# Supplementary material for: A computational approach to understand the role of metals and axial ligands in artificial heme enzyme catalyzed C–H insertion
Source: Royal Society of Chemistry journal article supplement (doi:10.1039/d1cp00412c), 2021-01-01
Supplement: d1cp00412c1.pdf [file d1cp00412c1.pdf]

*Electronic Supplementary Information*

for

**Computational Approach to Understand the Role of Metals and Axial Ligands in**

**Artificial Heme Enzymes Catalyzed C-H Insertion**

Reena Balhara, Ritwika Chatterjee and Garima Jindal\*

Department of Organic Chemistry, Indian Institute of Science, Bangalore 560012 (India)

## Table of Contents

### List of Tables

| <b>Computational Details</b> |                                                                                                                                                                                    | S4 |
|------------------------------|------------------------------------------------------------------------------------------------------------------------------------------------------------------------------------|----|
| <b>Table S1</b>              | Single Point Total Electronic Energies at the SMD <sub>(diethylether)</sub> /B3LYP/6-311++G**,LANL2DZ(Fe)//B3LYP/6-31G*,LANL2DZ(Fe) for Fe(his) System                             | S4 |
| <b>Table S2</b>              | Single Point Total Electronic Energies at the SMD <sub>(diethylether)</sub> /B3LYP/6-311++G**,LANL2DZ(Fe)//B3LYP/6-31G*,LANL2DZ(Fe) for Fe(cys) System                             | S5 |
| <b>Table S3</b>              | Single Point Total Electronic Energies at the SMD <sub>(diethylether)</sub> /B3LYP/6-311++G**,LANL2DZ(Ir)//B3LYP/6-31G*,LANL2DZ(Ir) for Ir Systems                                 | S5 |
| <b>Table S4</b>              | Single Point Total Electronic Energies at the SMD <sub>(diethylether)</sub> /B3LYP/6-311++G**,LANL2DZ(Fe)//B3LYP/6-31G*,LANL2DZ(Fe) for Fe Systems for <b>TS(C-D)</b>              | S6 |
| <b>Table S5</b>              | Single Point Total Electronic Energies (a.u.) at the SMD <sub>(diethylether)</sub> /M06/6-311++G**, LANL2DZ(Fe)//M06/6-31G*,LANL2DZ(Fe) for Fe Systems                             | S6 |
| <b>Table S6</b>              | Single Point Total Electronic Energies (a.u.) at the SMD <sub>(diethylether)</sub> /M06(or ωB97XD)/6-311++G**, LANL2DZ(Ir)//M06(or ωB97XD)/6-31G*,LANL2DZ(Ir) for Ir(Me)           | S6 |
| <b>Table S7</b>              | Relative Energies ( $\Delta E$ ) and Free Energies ( $\Delta G$ ) at the SMD <sub>(diethylether)</sub> /B3LYP/6-311++G**,LANL2DZ(Fe)//B3LYP/6-31G*,LANL2DZ(Fe) for Fe(his) System  | S7 |
| <b>Table S8</b>              | Relative Energies ( $\Delta E$ ) and Free Energies ( $\Delta G$ ) at the SMD <sub>(diethylether)</sub> /B3LYP/6-311++G**, LANL2DZ(Fe)//B3LYP/6-31G*,LANL2DZ(Fe) for Fe(cys) System | S7 |
| <b>Table S9</b>              | Relative Energies ( $\Delta E$ ) and Free Energies ( $\Delta G$ ) at the SMD <sub>(diethylether)</sub> /B3LYP/6-311++G**,LANL2DZ(Ir)//B3LYP/6-31G*,LANL2DZ(Ir) for Ir Systems      | S8 |

|                  |                                                                                                                                                                       |         |
|------------------|-----------------------------------------------------------------------------------------------------------------------------------------------------------------------|---------|
| <b>Table S10</b> | Natural Population Analysis Charges ( <i>e</i> ) and Mulliken Spin Densities for Fe(his) System                                                                       | S10     |
| <b>Table S11</b> | Natural Population Analysis Charges ( <i>e</i> ) and Mulliken Spin Densities for Fe(cys) System                                                                       | S11     |
| <b>Table S12</b> | Natural Population Analysis Charges ( <i>e</i> ) and Mulliken Spin Densities for Ir Systems                                                                           | S12     |
| <b>Table S13</b> | Comparison of Selected TSs at Different Level of Theories                                                                                                             | S13     |
| <b>Table S14</b> | Geometric parameters at different Level of Theories and basis sets for C intermediate                                                                                 | S13     |
| <b>Table S15</b> | Relative Free Energies (kcal/mol) of Key Stationary points at Different Level of Theories                                                                             | S14     |
| <b>Table S16</b> | Comparison of <b>TS(C-D)</b> at Different Level of Theories                                                                                                           | S14-S15 |
| <b>Table S17</b> | Comparison of <b>TS(C-D)</b> at Different Level of Theories with Cyclohexene as a Substrate for Intermolecular C-H Insertion                                          | S15     |
| <b>Table S18</b> | Energy Gaps for N <sub>2</sub> Expulsion TS                                                                                                                           | S16     |
| <b>Table S19</b> | Relative Energies and Optimized Dihedral Angles for Different Conformations in the Active Site of CYP119                                                              | S16     |
| <b>Table S20</b> | Single Point Total Electronic Energies at the SMD <sub>(diethylether)</sub> /B3LYP/6-311++G**, LANL2DZ(Fe/Ir)//B3LYP/6-31G*,LANL2DZ(Fe/Ir) for Fe(cys) and Ir Systems | S17     |
| <b>Table S21</b> | Relative Energies( $\Delta E$ ) at the SMD <sub>(diethylether)</sub> /B3LYP/6-311++G**,LANL2DZ(Fe/Ir)//B3LYP/6-31G*,LANL2DZ(Fe/Ir) for Fe(cys) and Ir systems         | S17     |

#### List of Figures

|                |                                                                                                                           |          |
|----------------|---------------------------------------------------------------------------------------------------------------------------|----------|
| <b>Fig. S1</b> | Optimized geometries of selected TSs                                                                                      | S8-S9    |
| <b>Fig. S2</b> | Optimized geometries of <b>TS(B-B')</b> for Ir systems and relative free energies with respect to the separated reactants | S9       |
| <b>Fig. S3</b> | Activation strain analysis                                                                                                | S9       |
| <b>Fig. S4</b> | Charge transfer analysis for Ir systems                                                                                   | S12      |
|                | <b>Coordinates of Optimized Geometries</b>                                                                                | S18-S382 |

## Computational Details

### *Distortion-Interaction Analysis*

To understand the origin of lower barriers in the Ir(Me) system for the first step, we carried out a *distortion-interaction* analysis. The *activation strain* model or *distortion-interaction* model is a robust tool for analyzing the origin of activation barriers. In this model, the strain energy comprises of two terms; the first is the energy required for deformation of the reactants on going from ground state geometry to the TS (transition state) geometry; the second is the and the interaction energy between the deformed reactants in the transition state.(Ref.- F. M. Bickelhaupt and K. N. Houk, *Angew. Chem. Int. Ed.*, 2017, **56**, 10070.)

$$\Delta E_{\text{strain}} = \Delta E_{\text{distortion}} + \Delta E_{\text{interaction}}$$

**Table S1** Single Point Total Electronic Energies (a.u.) at the SMD<sub>(diethylether)</sub>/B3LYP/6-311++G\*\*, LANL2DZ(Fe)//B3LYP/6-31G\*,LANL2DZ(Fe) for Fe(his) System

|                  | CSS            | OSS            | Triplet        | Quintet                   |
|------------------|----------------|----------------|----------------|---------------------------|
| <b>Substrate</b> | -761.771745    | -761.771745    | -761.771745    | -761.771745               |
| <b>A</b>         | -2185.316306   | -2185.317924   | -2185.322791   | -2185.323771              |
| <b>B</b>         | -2947.11358    | -2947.114490   | -2947.117906   | -2947.119302              |
| <b>TS(B-C)</b>   | -2947.075407   | - <sup>a</sup> | - <sup>a</sup> | - <sup>a</sup>            |
| <b>C</b>         | -2947.115093   | -2947.117885   | -2947.100418   | -2947.093364              |
| <b>TS(C-D)</b>   | -2837.535702   | -2837.532731   | -2837.509098   | - <sup>a</sup>            |
| <b>D</b>         | - <sup>b</sup> | -2837.548337   | -2837.548423   | -2837.541578 <sup>a</sup> |
| <b>TS(D-E)</b>   | - <sup>b</sup> | - <sup>a</sup> | -2837.531871   | - <sup>a</sup>            |
| <b>E</b>         | - <sup>b</sup> | -652.18813801  | -652.18813801  | -652.18813801             |
| <b>TS(E-P)</b>   | - <sup>b</sup> | -652.17654247  | -652.17654247  | -652.17654247             |
| <b>P</b>         | -652.2919369   | -652.2919369   | -652.2919369   | -652.2919369              |

CSS – Closed shell singlet.

OSS – Open shell singlet.

<sup>a</sup>Substrate moves away from Fe(his) system. <sup>b</sup>For CSS, we have concerted hydride transfer mechanism.

**Table S2** Single Point Total Electronic Energies (a.u.) at the SMD<sub>(diethylether)</sub>/B3LYP/6-311++G\*\*, LANL2DZ(Fe)//B3LYP/6-31G\*,LANL2DZ(Fe) for Fe(cys) System

|                  | CSS            | OSS           | Triplet       | Quintet                   |
|------------------|----------------|---------------|---------------|---------------------------|
| <b>Substrate</b> | -761.771745    | -761.771745   | -761.771745   | -761.771745               |
| <b>A</b>         | -2397.256925   | -2397.258367  | -2185.322791  | -2397.273748              |
| <b>B</b>         | -3159.048724   | -3159.051186  | -3159.056272  | -3159.066365              |
| <b>TS(B-C)</b>   | -3159.012259   | -3159.016936  | -3159.019534  | -3159.003381 <sup>a</sup> |
| <b>C</b>         | -3159.053811   | -3159.061891  | -3159.057162  | -3159.035085              |
| <b>TS(C-D)</b>   | -3049.469844   | -3049.475929  | -3049.474647  | -3049.458500              |
| <b>D</b>         | - <sup>b</sup> | -3049.500455  | -3049.500604  | -3049.492246 <sup>a</sup> |
| <b>TS(D-E)</b>   | - <sup>b</sup> | -3049.494445  | -3049.498029  | - <sup>a</sup>            |
| <b>E</b>         | - <sup>b</sup> | -652.18813801 | -652.18813801 | -652.18813801             |
| <b>TS(E-P)</b>   | - <sup>b</sup> | -652.17654247 | -652.17654247 | -652.17654247             |
| <b>P</b>         | -652.2919369   | -652.2919369  | -652.2919369  | -652.2919369              |

<sup>a</sup>Substrate moves away from Fe(cys) system. <sup>b</sup>For CSS, we have concerted hydride transfer mechanism.

**Table S3** Single Point Total Electronic Energies (a.u.) at the SMD<sub>(diethylether)</sub>/B3LYP/6-311++G\*\*, LANL2DZ(Ir)//B3LYP/6-31G\*,LANL2DZ(Ir) for Ir Systems

|                  | Ir(Me)         | Ir(His)        | Ir           | Ir(Cl)       |
|------------------|----------------|----------------|--------------|--------------|
| <b>Substrate</b> | -761.771745    | -761.771745    | -761.771745  | -761.771745  |
| <b>A</b>         | -1980.215866   | -2166.450756   | -1940.065005 | -2400.536386 |
| <b>B</b>         | -2742.012524   | -2928.274555   | -2701.859275 | -3162.330682 |
| <b>TS(B-B')</b>  | - <sup>a</sup> | - <sup>a</sup> | -2700.874803 | -3162.343074 |
| <b>B'</b>        | - <sup>a</sup> | -2928.261280   | -2701.903215 | -3162.343437 |
| <b>TS(B-C)</b>   | -2741.981866   | -2928.259459   | -2701.903009 | -3162.338866 |
| <b>C</b>         | -2742.011763   | -2928.297147   | -2701.955117 | -3162.384661 |
| <b>TS(C-P)</b>   | -2632.424474   | -2818.690755   | -2592.354467 | -3052.774479 |
| <b>P</b>         | -652.2919369   | -652.2919369   | -652.2919369 | -652.2919369 |

<sup>a</sup>Optimization of **B'** and **TS(B-B')** resulted in **B**.

**Table S4** Single Point Total Electronic Energies (a.u.) at the SMD<sub>(diethylether)</sub>/ $\omega$ B97XD/6-311++G\*\*, LANL2DZ(Fe)// $\omega$ B97XD/6-31G\*,LANL2DZ(Fe) for Fe Systems

|                |                | CSS        | OSS          | Triplet     | Quintet    |
|----------------|----------------|------------|--------------|-------------|------------|
| <b>Fe(his)</b> | <b>A</b>       | -          | -            | -           | -2184.5206 |
|                | <b>TS(B-C)</b> | -2945.9869 | -            | -           | -          |
|                | <b>TS(C-D)</b> | -2836.4865 | -2836.477124 | -2836.46982 | -          |
| <b>Fe(cys)</b> | <b>A</b>       | -          | -            | -           | -2396.5146 |
|                | <b>TS(B-C)</b> | -3157.9592 | -3157.9599   | -3157.9579  | -          |
|                | <b>TS(C-D)</b> | -3048.4598 | -3048.4654   | -3048.4604  | -          |

**Table S5** Single Point Total Electronic Energies (a.u.) at the SMD<sub>(diethylether)</sub>/M06/6-311++G\*\*, LANL2DZ(Fe)//M06/6-31G\*,LANL2DZ(Fe) for Fe Systems

|                |                | CSS        | OSS        | Triplet    | Quintet    |
|----------------|----------------|------------|------------|------------|------------|
| <b>Fe(his)</b> | <b>A</b>       | -          | -          | -          | -2183.8072 |
|                | <b>TS(B-C)</b> | -2945.0177 | -          | -2945.0085 | -          |
|                | <b>TS(C-D)</b> | -2835.5412 | -2835.5373 | -          | -          |
| <b>Fe(cys)</b> | <b>A</b>       | -          | -          | -          | -2395.8484 |
|                | <b>TS(B-C)</b> | -3157.0519 | -3157.0544 | -3157.0529 | -          |
|                | <b>TS(C-D)</b> | -3047.5718 | -3047.5782 | -3047.5725 | -          |

**Table S6** Single Point Total Electronic Energies (a.u.) at the SMD<sub>(diethylether)</sub>/M06(or  $\omega$ B97XD)/6-311++G\*\*, LANL2DZ(Ir)//M06(or  $\omega$ B97XD)/6-31G\*,LANL2DZ(Ir) for Ir(Me)

|                | $\omega$ B97XD | M06        |
|----------------|----------------|------------|
| <b>A</b>       | -1979.4777     | -1978.7584 |
| <b>B</b>       | -2740.9993     | -2740.0398 |
| <b>TS(B-C)</b> | -2740.9593     | -2740.0163 |
| <b>C</b>       | -2740.9877     | -2740.039  |
| <b>TS(C-D)</b> | -2631.4519     | -2630.5136 |

**Table S7** Relative Energies ( $\Delta E$ ) and Free Energies ( $\Delta G$ ) at the SMD<sub>(diethylether)</sub>/B3LYP/6-311++G\*\*,LANL2DZ(Fe)//B3LYP/6-31G\*,LANL2DZ(Fe) for Fe(his) System

|                  | CSS        |            | OSS        |            | Triplet    |            | Quintet    |            |
|------------------|------------|------------|------------|------------|------------|------------|------------|------------|
|                  | $\Delta E$ | $\Delta G$ |
| <b>A +</b>       | 6.7        | 9.8        | 5.2        | 7.7        | 1.8        | 2.3        | 0.0        | 0.0        |
| <b>Substrate</b> |            |            |            |            |            |            |            |            |
| <b>B</b>         | -7.6       | 10.3       | -8.8       | 7.3        | -11.3      | 2.7        | -13.4      | -0.3       |
| <b>TS(B-C)</b>   | 14.2       | 34.9       | -          | -          | -          | -          | -          | -          |
| <b>C</b>         | -11.2      | 4.5        | -13.3      | 2.7        | -3.0       | 11.3       | -0.5       | 9.9        |
| <b>TS(C-D)</b>   | 2.2        | 14.3       | 2.6        | 14.0       | 7.9        | 18.0       | -          | -          |
| <b>D</b>         | -          | -          | -5.1       | 4.9        | -5.3       | 4.0        | -3.8       | -0.2       |
| <b>TS(D-E)</b>   | -          | -          | -          | -          | 4.2        | 13.6       | -          | -          |
| <b>E</b>         | -          | -          | 13.7       | 4.3        | 13.7       | 4.3        | 13.7       | 4.3        |
| <b>TS(E-P)</b>   | -          | -          | 21.1       | 12.4       | 21.1       | 12.4       | 21.1       | 12.4       |
| <b>P</b>         | -47.9      | -56.9      | -47.9      | -56.9      | -47.9      | -56.9      | -47.9      | -56.9      |

Relative energies and free energies are given in kcal/mol.

**Table S8** Relative Energies ( $\Delta E$ ) and Free Energies ( $\Delta G$ ) at the SMD<sub>(diethylether)</sub>/B3LYP/6-311++G\*\*,LANL2DZ(Fe)//B3LYP/6-31G\*,LANL2DZ(Fe) for Fe(cys) System

|                  | CSS        |            | OSS        |            | Triplet    |            | Quintet    |            |
|------------------|------------|------------|------------|------------|------------|------------|------------|------------|
|                  | $\Delta E$ | $\Delta G$ |
| <b>A +</b>       | 12.4       | 15.1       | 11.2       | 13.5       | 6.9        | 8.5        | 0.0        | 0.0        |
| <b>Substrate</b> |            |            |            |            |            |            |            |            |
| <b>B</b>         | 1.2        | 17.1       | 0.0        | 17.3       | -4.4       | 9.5        | -11.7      | 1.3        |
| <b>TS(B-C)</b>   | 22.6       | 44.8       | 19.3       | 41.1       | 17.4       | 37.7       | 26.3       | 42.9       |
| <b>C</b>         | -4.4       | 10.5       | -10.7      | 2.2        | -6.9       | 9.1        | 5.5        | 18.5       |
| <b>TS(C-D)</b>   | 11.4       | 23.4       | 6.5        | 18.6       | 7.3        | 20.3       | 15.4       | 24.8       |
| <b>D</b>         | -          | -          | -6.9       | 4.0        | -6.9       | 3.4        | -3.8       | 1.2        |
| <b>TS(D-E)</b>   | -          | -          | -3.8       | 6.4        | -5.8       | 4.4        | -          | -          |
| <b>E</b>         | -          | -          | 13.7       | 4.3        | 13.7       | 4.3        | 13.7       | 4.3        |
| <b>TS(E-P)</b>   | -          | -          | 21.1       | 12.4       | 21.1       | 12.4       | 21.1       | 12.4       |
| <b>P</b>         | -47.9      | -56.9      | -47.9      | -56.9      | -47.9      | -56.9      | -47.9      | -56.9      |

Relative energies and free energies are given in kcal/mol.

**Table S9** Relative Energies ( $\Delta E$ ) and Free Energies ( $\Delta G$ ) at the SMD<sub>(diethylether)</sub>/B3LYP/6-311++G\*\*,LANL2DZ(Ir)//B3LYP/6-31G\*,LANL2DZ(Ir) for Ir Systems

|                  | Ir(Me)     |            | Ir(His)    |            | Ir         |            | Ir(Cl)     |            |
|------------------|------------|------------|------------|------------|------------|------------|------------|------------|
|                  | $\Delta E$ | $\Delta G$ |
| A+               | 0.0        | 0.0        | 0.0        | 0.0        | 0.0        | 0.0        | 0.0        | 0.0        |
| <b>Substrate</b> |            |            |            |            |            |            |            |            |
| B                | -17.5      | -5.9       | -29.9      | -11.1      | -12.9      | -1.9       | -12.7      | 1.6        |
| TS(B-B')         | -          | -          | -          | -          | -19.3      | -3.9       | -20.3      | -2.1       |
| B'               | -          | -          | -22.8      | -4.8       | -40.5      | -24.9      | -20.6      | -2.5       |
| TS(B-C)          | 2.4        | 17.9       | -22.6      | -3.1       | -41.1      | -25.3      | -18.9      | -0.3       |
| C                | -17.4      | -6.5       | -47.6      | -34.7      | -74.7      | -63.9      | -48.4      | -35.0      |
| TS(C-P)          | 0.3        | 5.2        | -16.5      | -8.3       | -47.7      | -41.6      | -15.5      | -7.6       |
| P                | -47.9      | -56.9      | -47.9      | -56.9      | -47.9      | -56.9      | -47.9      | -56.9      |

Relative energies and free energies are given in kcal/mol.

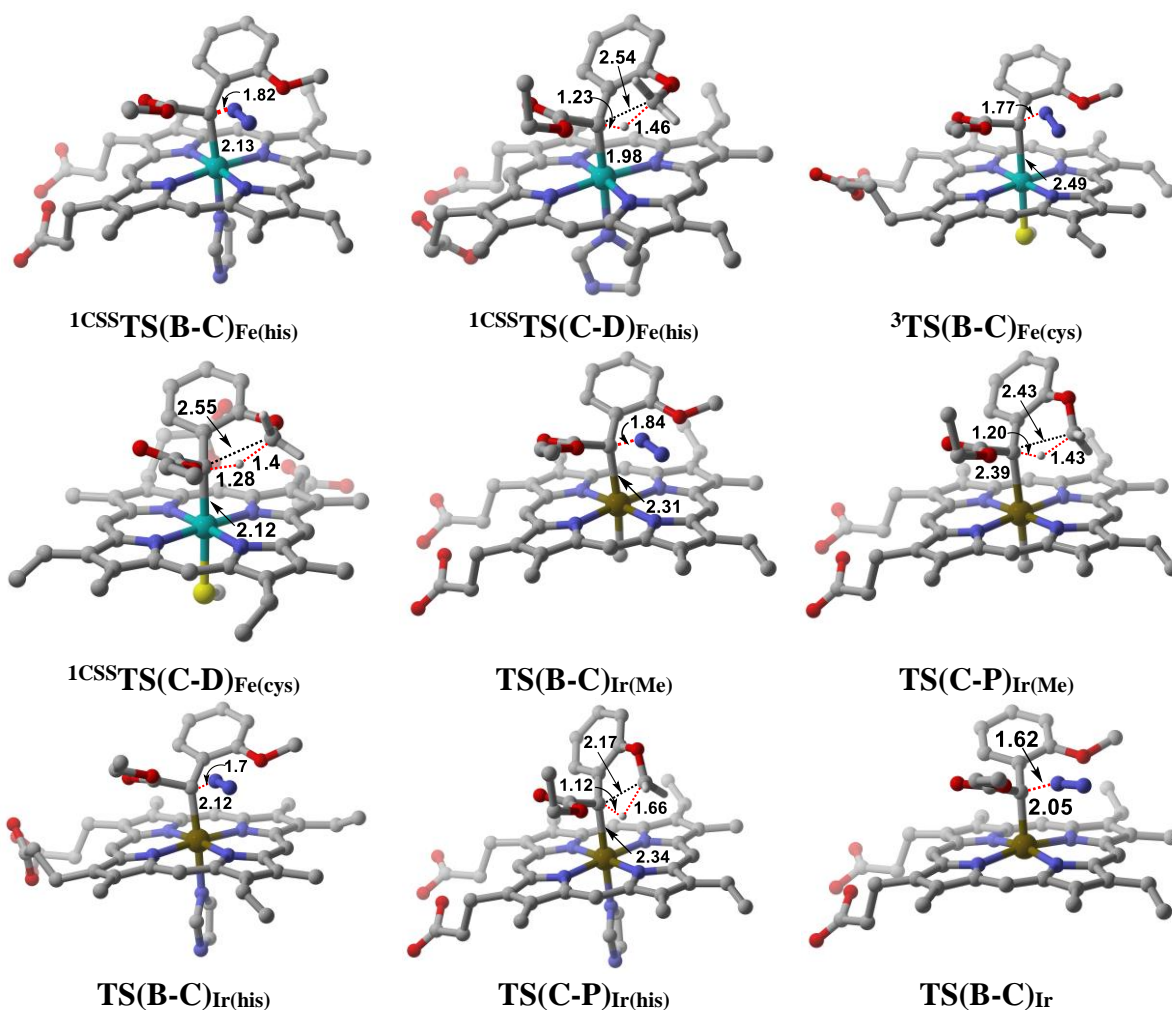



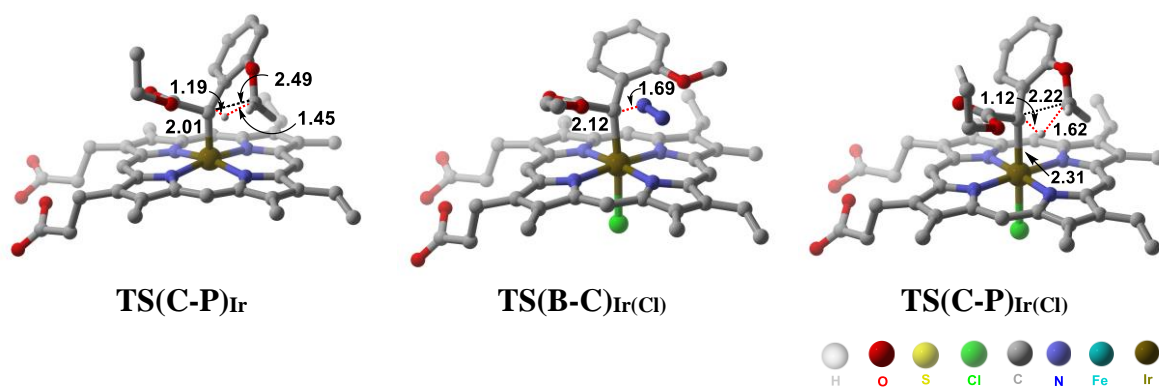

**Fig. S1** Optimized geometries of select TSs.

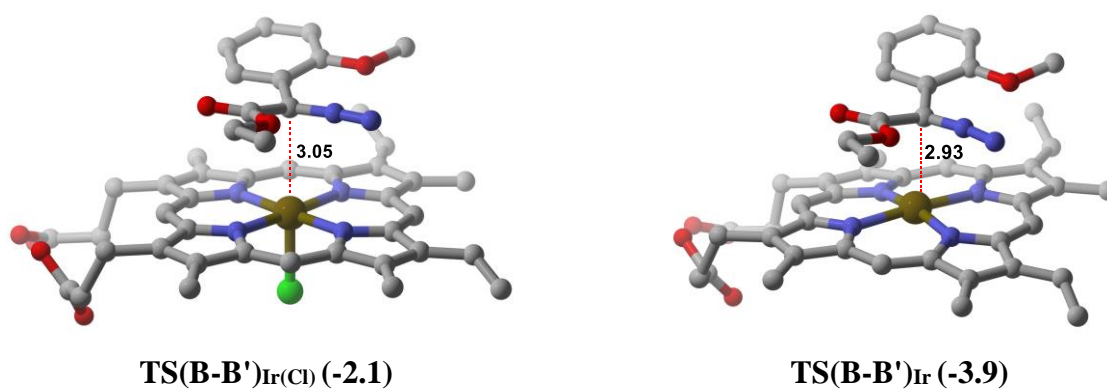

**Fig. S2** Optimized Geometries of **TS(B-B')** for Ir systems and relative free energies (kcal/mol).

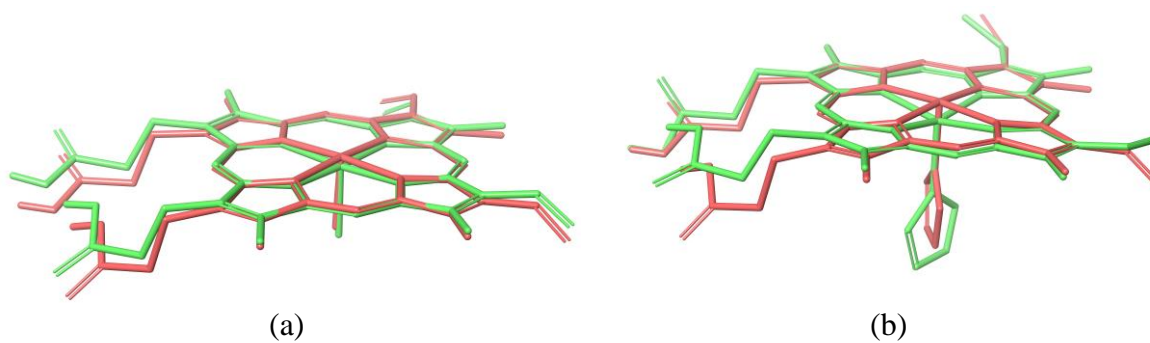

**Fig. S3** Overlay of the optimized geometries of ground state metal-porphyrin (in red) with fragment from TS geometry (in green) (a) Ir(Me)-Porphyrin (b) Fe(his)-Porphyrin.

**Table S10** Natural Population Analysis Charges ( $e$ ) and Mulliken Spin Densities for Fe(his) System<sup>a</sup>

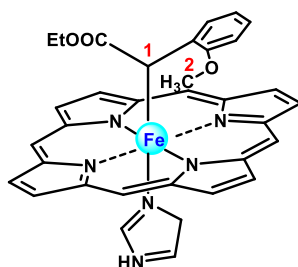

|         |    |              | CSS          | OSS      | Triplet  | Quintet  |         |
|---------|----|--------------|--------------|----------|----------|----------|---------|
| TS(B-C) | Fe | Charge       | 0.2005       | -        | -        | -        |         |
|         |    | Spin density | 0.0          | -        | -        | -        |         |
|         | C1 | Charge       | 0.0062       | -        | -        | -        |         |
|         |    | Spin density | 0.0          | -        | -        | -        |         |
|         | C  | Fe           | Charge       | 0.48853  | 0.19682  | 0.40730  | 1.08024 |
|         |    |              | Spin density | 0.0      | -0.8     | 1.4      | 4.3     |
| C1      |    | Charge       | 0.11011      | 0.13903  | -0.04245 | -0.19697 |         |
|         |    | Spin density | 0.0          | 0.6      | 0.9      | -0.4     |         |
| TS(C-D) |    | Fe           | Charge       | 0.24621  | 0.36735  | 0.52313  | -       |
|         |    |              | Spin density | 0.0      | 1.04     | 1.4      | -       |
|         | C1 | Charge       | -0.29944     | -0.33039 | -0.33242 | -        |         |
|         |    | Spin density | 0.0          | -0.24    | 0.3      | -        |         |
|         | C2 | Charge       | 0.0734       | -0.05126 | -0.13243 | -        |         |
|         |    | Spin density | 0.0          | -0.5     | 0.5      | -        |         |

<sup>a</sup>Substituents are not shown on porphyrin for clarity.

**Table S11** Natural Population Analysis Charges ( $e$ ) and Mulliken Spin Densities for Fe(cys) System<sup>a</sup>

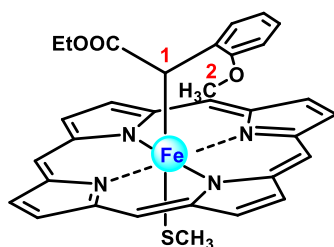

|                |           |                     | CSS                 | OSS      | Triplet  | Quintet   |         |
|----------------|-----------|---------------------|---------------------|----------|----------|-----------|---------|
| <b>TS(B-C)</b> | <b>Fe</b> | <b>Charge</b>       | 0.04697             | 0.2675   | 0.34036  | 0.53621   |         |
|                |           | <b>Spin density</b> | 0.0                 | 1.2      | 1.4      | 2.5       |         |
|                | <b>C1</b> | <b>Charge</b>       | -0.03485            | -0.16371 | -0.16183 | -0.142406 |         |
|                |           | <b>Spin density</b> | 0.0                 | -0.4     | 0.2      | -0.04     |         |
|                | <b>C</b>  | <b>Fe</b>           | <b>Charge</b>       | -0.07524 | 0.10987  | 0.18917   | 0.68177 |
|                |           |                     | <b>Spin density</b> | 0.0      | 1.0      | 1.3       | 3.0     |
| <b>C1</b>      |           | <b>Charge</b>       | 0.19740             | 0.00739  | -0.06010 | -0.18094  |         |
|                |           | <b>Spin density</b> | 0.0                 | -0.9     | 0.8      | 1.0       |         |
| <b>TS(C-D)</b> |           | <b>Fe</b>           | <b>Charge</b>       | 0.05652  | 0.27527  | 0.28554   | 0.71244 |
|                |           |                     | <b>Spin density</b> | 0.0      | 1.3      | 1.3       | 3.98    |
|                | <b>C1</b> | <b>Charge</b>       | -0.28643            | -0.38646 | -0.43982 | -0.38229  |         |
|                |           | <b>Spin density</b> | 0.0                 | -0.6     | 0.2      | 0.2       |         |
|                | <b>C2</b> | <b>Charge</b>       | 0.04553             | -0.13269 | -0.09794 | -0.12862  |         |
|                |           | <b>Spin density</b> | 0.0                 | -0.5     | 0.7      | 0.5       |         |

<sup>a</sup>Substituents are not shown on porphyrin for clarity.

**Table S112** Natural Population Analysis Charges ( $e$ ) and Spin Densities for Ir Systems<sup>a</sup>

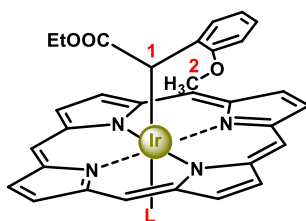

|                |           | Ir(Me)    | Ir(His)  | Ir       | Ir(Cl)   |
|----------------|-----------|-----------|----------|----------|----------|
|                | <b>Ir</b> | 0.37453   | 0.45146  | 0.64592  | 0.33191  |
| <b>TS(B-C)</b> | <b>C1</b> | -0.003741 | 0.00049  | 0.02027  | -0.01664 |
|                | <b>Ir</b> | 0.33240   | 0.45944  | 0.67737  | 0.34776  |
| <b>C</b>       | <b>C1</b> | 0.09808   | 0.20695  | 0.16789  | 0.19993  |
|                | <b>Ir</b> | 0.38572   | 0.50716  | 0.67558  | 0.35345  |
| <b>TS(C-P)</b> | <b>C1</b> | -0.31831  | -0.41986 | -0.20519 | -0.38913 |
|                | <b>C2</b> | 0.07417   | 0.14404  | 0.14308  | 0.13200  |

<sup>a</sup>Substituents are not shown on porphyrin due to clarity.

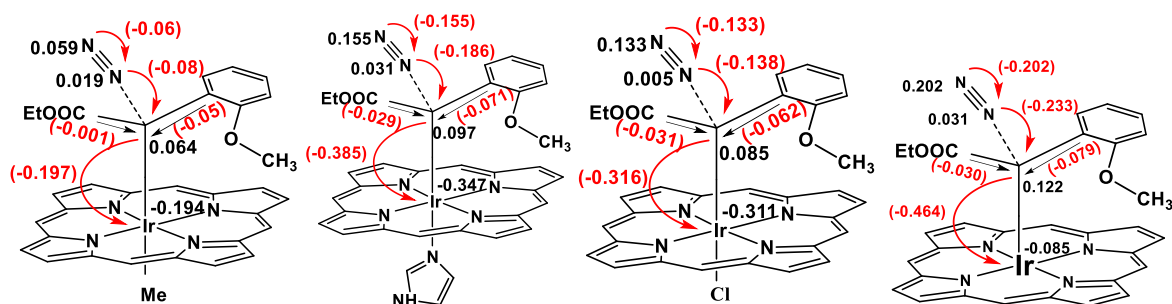

**Fig. S4** Charge transfer ( $e$ ) analysis for Ir Systems (change in charge on going from reactants to TS via **TS(B-C)** is shown in black, and the amount of charge transfer is shown in red).

**Table S13** Comparison of Selected TSs at Different Level of Theories. Relative Free Energies are in kcal/mol

|         |         |         | B3LYP          | $\omega$ B97XD | M06              |
|---------|---------|---------|----------------|----------------|------------------|
| Fe(his) | TS(B-C) | CSS     | - <sup>a</sup> | - <sup>a</sup> | 0.0              |
|         |         | Triplet | - <sup>a</sup> | - <sup>a</sup> | 3.1 <sup>b</sup> |
|         |         | OSS     | 0.0            | 0.0            | 0.0              |
|         | TS(C-D) | CSS     | 0.3            | -3.0           | -1.5             |
|         |         | Triplet | 4.0            | 3.6            | - <sup>c</sup>   |
|         |         | OSS     | 0.0            | 0.0            | 0.0              |
| Fe(cys) | TS(B-C) | CSS     | 3.7            | 1.0            | 2.4              |
|         |         | Triplet | -3.4           | 1.0            | -0.1             |
|         |         | OSS     | 0.0            | 0.0            | 0.0              |
|         | TS(C-D) | CSS     | 4.8            | 5.8            | 6.9              |
|         |         | Triplet | 1.7            | 2.1            | 2.9              |

<sup>a</sup>Only CSS is obtained. <sup>b</sup>Relative free energy with respect to CSS. Relative free energies with respect to OSS are given in kcal/mol.

**Table S14** Geometric Parameters at Different Level of Theories and Basis Sets for C Intermediate. Distances are in Å and Angles in °.

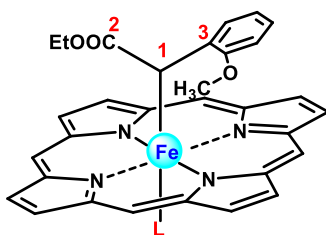

|         |               | M-L  | M-C1 | ∠ M-C1-C2 | ∠ M-C1-C3 | ∠ C2-C1-C3 |
|---------|---------------|------|------|-----------|-----------|------------|
| Ir(Me)  | B3LYP/6-31G*  | 2.15 | 2.05 | 117.11    | 128.83    | 110.88     |
|         | wB97XD/6-31G* | 2.12 | 2.01 | 117.21    | 128.37    | 111.09     |
|         | B3LYP/DEF2SVP | 2.15 | 2.06 | 117.22    | 126.46    | 113.47     |
| Fe(his) | B3LYP/6-31G*  | 2.22 | 1.85 | 118.77    | 128.73    | 110.50     |
|         | B3LYP/DEF2SVP | 2.19 | 1.86 | 118.74    | 128.63    | 110.59     |
| Fe(cys) | B3LYP/6-31G*  | 2.41 | 1.96 | 121.02    | 125.62    | 111.74     |
|         | wB97XD/6-31G* | 2.36 | 1.96 | 119.77    | 122.01    | 114.20     |
|         | B3LYP/DEF2SVP | 2.36 | 1.98 | 20.94     | 124.92    | 112.33     |

**Table S15** Relative Free Energies (kcal/mol) for Key Stationary points at Different Level of Theories.

|                |                    |                | <b>B3LYP</b> | <b><math>\omega</math>B97XD</b> | <b>M06</b> |
|----------------|--------------------|----------------|--------------|---------------------------------|------------|
| <b>Ir(Me)</b>  | <b>A+Substrate</b> |                | 0.0          | 0.0                             | 0.0        |
|                | <b>B</b>           |                | -5.9         | -8.4                            | -5.5       |
|                | <b>TS(B-C)</b>     |                | 17.9         | 15.9                            | 10.3       |
|                | <b>C</b>           |                | -6.5         | -5.1                            | -8.7       |
|                | <b>TS(C-P)</b>     |                | 5.2          | -1.6                            | 5.3        |
| <b>Fe(cys)</b> | <b>A+Substrate</b> | <b>Quintet</b> | 0.0          | 0.0                             | 0.0        |
|                | <b>TS(B-C)</b>     | <b>Triplet</b> | 37.7         | 47.7                            | 49.4       |
|                | <b>C</b>           | <b>OSS</b>     | 2.2          | 21.7                            | 13.9       |
|                | <b>TS(C-D)</b>     | <b>OSS</b>     | 18.6         | 20.9                            | 29.5       |
| <b>Fe(his)</b> | <b>A+Substrate</b> | <b>Quintet</b> | 0.0          | 0.0                             | 0.0        |
|                | <b>TS(B-C)</b>     | <b>CSS</b>     | 34.9         | 32.9                            | 46.6       |
|                | <b>TS(C-D)</b>     | <b>OSS</b>     | 14.0         | 16.3                            | 29.7       |

**Table S16** Comparison of TS(C-D) at Different Level of Theories<sup>a</sup>

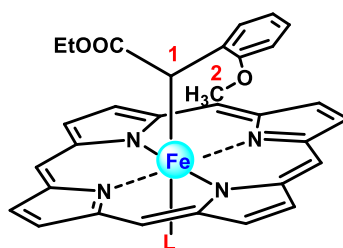

|                 |                | <b>B3LYP</b>         |                  |           |           | <b><math>\omega</math>B97XD</b> |                  |           |           | <b>Process Involved</b> |
|-----------------|----------------|----------------------|------------------|-----------|-----------|---------------------------------|------------------|-----------|-----------|-------------------------|
|                 |                | <b>Mulliken Spin</b> |                  |           |           | <b>Mulliken Spin</b>            |                  |           |           |                         |
|                 |                | $\Delta$ G           | <b>densities</b> |           |           | $\Delta$ G                      | <b>densities</b> |           |           |                         |
|                 |                |                      | <b>Fe</b>        | <b>C1</b> | <b>C2</b> |                                 | <b>Fe</b>        | <b>C1</b> | <b>C2</b> |                         |
| <b>Fe (his)</b> | <b>OSS</b>     | 0.0                  | 1.0              | -0.3      | -0.5      | 0.0                             | 1.1              | -0.3      | -0.6      | HAT                     |
|                 | <b>CSS</b>     | 0.3                  | 0.0              | 0.0       | 0.0       | -3.0                            | 0.0              | 0.0       | 0.0       | Hydride transfer        |
|                 | <b>Triplet</b> | 4.0                  | 1.4              | 0.3       | 0.5       | 3.6                             | 1.3              | 0.4       | 0.5       | HAT                     |
| <b>Fe (cys)</b> | <b>OSS</b>     | 0.0                  | 1.3              | -0.6      | -0.5      | 0.0                             | 1.2              | -0.5      | -0.5      | HAT                     |
|                 | <b>CSS</b>     | 4.8                  | 0.0              | 0.0       | 0.0       | 5.8                             | 0.0              | 0.0       | 0.0       | Hydride transfer        |
|                 | <b>Triplet</b> | 1.7                  | 1.3              | 0.2       | 0.7       | 2.1                             | 1.1              | 0.4       | 0.6       | HAT                     |
|                 | <b>OSS</b>     | 0.0                  | 1.2              | -0.4      | -0.5      | 0.0                             | 1.3              | -0.5      | -0.6      | HAT                     |

|           |                |     |     |      |       |     |     |      |       |                  |
|-----------|----------------|-----|-----|------|-------|-----|-----|------|-------|------------------|
| <b>Fe</b> | <b>CSS</b>     | 5.4 | 0.0 | 0.0  | 0.0   | 1.2 | 0.0 | 0.0  | 0.0   | Hydride transfer |
|           | <b>Triplet</b> | 0.8 | 2.3 | -0.2 | -0.04 | 0.3 | 2.1 | -0.1 | -0.04 | Hydride transfer |

<sup>a</sup>Substituents are not shown on porphyrin for clarity. Relative free energies with respect to OSS are given in kcal/mol.

**Table S17** Comparison of **TS(C-D)** at Different Level of Theories with Cyclohexene as a Substrate for Intermolecular C-H Insertion<sup>a</sup>

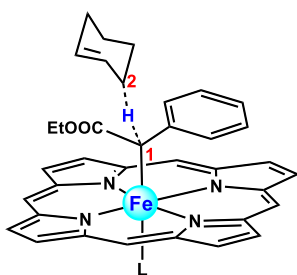

|                |                | <b>B3LYP</b>      |                                |           |           | <b>wB97XD</b> |                                |           |           | <b>Process involved</b> |
|----------------|----------------|-------------------|--------------------------------|-----------|-----------|---------------|--------------------------------|-----------|-----------|-------------------------|
|                |                | $\Delta G$        | <b>Mulliken Spin densities</b> |           |           | $\Delta G$    | <b>Mulliken Spin densities</b> |           |           |                         |
|                |                |                   | <b>Fe</b>                      | <b>C1</b> | <b>C2</b> |               | <b>Fe</b>                      | <b>C1</b> | <b>C2</b> |                         |
| <b>Fe(his)</b> | <b>OSS</b>     | 0.0               | -1.1                           | 0.4       | 0.3       | 0.0           | -1.1                           | 0.4       | 0.4       | HAT                     |
|                | <b>CSS</b>     | 1.6               | 0.0                            | 0.0       | 0.0       | 1.4           | 0.0                            | 0.0       | 0.0       | Hydride transfer        |
|                | <b>Triplet</b> | 0.7 <sup>b</sup>  | 2.0                            | -0.0      | 0.1       | 2.9           | 1.3                            | 0.5       | 0.3       | HAT                     |
| <b>Fe</b>      | <b>OSS</b>     | 0.0               | 1.0                            | -0.5      | -0.3      | 0.0           | 1.3                            | -0.6      | -0.3      | HAT                     |
|                | <b>CSS</b>     | 4.2               | 0.0                            | 0.0       | 0.0       | 5.5           | 0.0                            | 0.0       | 0.0       | Hydride transfer        |
|                | <b>Triplet</b> | 11.6 <sup>b</sup> | 2.0                            | 0.0       | 0.1       | -0.4          | 2.1                            | -0.1      | 0.1       | Hydride transfer        |

<sup>a</sup>R. L. Khade and Y. Zhang, *Chem. Eur. J.*, 2017, **23**, 17654. <sup>b</sup>Substrate moves away from metal-porphyrin.

Relative Energies with respect to OSS are in kcal/mol.

**Table S18** Energy Gaps for N<sub>2</sub> Expulsion Transition State

|                                                    | Orbital energy  |              |       |
|----------------------------------------------------|-----------------|--------------|-------|
|                                                    | M               | C-N*         | gap   |
| <sup>1</sup> CSST <b>S(B-C)</b> <sub>Fe(his)</sub> | -0.187 (homo-2) | -0.080(lumo) | 0.107 |
| <sup>1</sup> CSST <b>S(B-C)</b> <sub>Fe(cys)</sub> | -0.157(homo-3)  | -0.063(lumo) | 0.094 |
| <b>TS(B-C)</b> <sub>Ir(Me)</sub>                   | -0.196(homo-2)  | -0.096(lumo) | 0.100 |

**Table S19** Relative Energies( $\Delta E$ ) at the B3LYP/6-31G\*,LANL2DZ(Fe) and Optimized Dihedral Angles for Different Conformations in the Active Site of CYP119<sup>a</sup>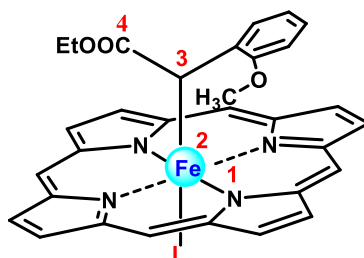

|                                               | N1-Fe2-C3-C4 |           |            |
|-----------------------------------------------|--------------|-----------|------------|
|                                               | Initial      | Optimized | $\Delta E$ |
| <sup>1</sup> CSST <b>C</b> <sub>Fe(cys)</sub> | -17.6        | -40.5     | 0.0        |
| <b>conf1</b>                                  | 0.0          | -24.6     | 0.1        |
| <b>Conf2</b>                                  | 45.2         | -26.9     | 0.1        |
| <b>Conf3</b>                                  | 90.4         | 65.3      | 2.6        |
| <b>Conf4</b>                                  | 127.9        | 137.1     | 14.9       |
| <b>Conf5</b>                                  | 168.6        | 169.0     | 2.1        |
| <b>Conf6</b>                                  | -58.6        | -24.6     | 0.1        |
| <b>Conf7</b>                                  | -135.6       | -169.1    | 0.2        |

<sup>a</sup>Substituents are not shown on porphyrin for clarity. Relative energies are given in kcal/mol.

As can be seen from Table S19, during optimization Conf6 converges to Conf1. Additionally, <sup>1</sup>CSST**C**<sub>Fe(cys)</sub>, Conf1, Conf2 and Conf7 lie within 0.2 kcal/mol. Such close conformations were also observed by Fasan, Zhang and coworkers in their QM cluster study of cyclopropanation



reaction (A. Tinoco, Y. Wei, J.-P. Bacik, D. M. Carminati, E. J. Moore, N. Ando, Y. Zhang and R. Fasan, *ACS Catal.*, 2019, **9**, 1514-1524). This shows that these conformations are affected by protein environment in a subtle way. However, the energy barriers are not going to be significantly affected by taking an average of these conformations. A thorough molecular dynamics study is currently underway in our laboratory.

**Table S20** Single Point Total Electronic Energies (a.u.) at the SMD<sub>(diethylether)</sub>/B3LYP/6-311++G\*\*, LANL2DZ(Fe/Ir)//B3LYP/6-31G\*,LANL2DZ(Fe/Ir) for Fe(cys) and Ir System

|                  | <b>Fe(cys)</b> | <b>Ir(Me)</b> | <b>(C317G,T213A)-<br/>Ir(Me)-CYP119</b> |
|------------------|----------------|---------------|-----------------------------------------|
| <b>Substrate</b> | -761.771746    | -761.771746   | -761.771746                             |
| <b>A</b>         | -4732.116045   | -4753.79759   | -4201.65681                             |
| <b>B</b>         | -              | -5515.59190   | -4963.44832                             |
| <b>TS(B-C)</b>   | -5493.831774   | -5515.56168   | -4963.42169                             |
| <b>C</b>         | -              | -5515.59789   | -4963.45357                             |

**Table S21** Relative Energies ( $\Delta E$ ) (kcal/mol) at the SMD<sub>(diethylether)</sub>/B3LYP/6-311++G\*\*,LANL2DZ(Fe/Ir)//B3LYP/6-31G\*,LANL2DZ(Fe/Ir) for Fe-CYP119 and Ir(Me)-CYP119 Systems

|                    | <b>Fe(cys)-CYP119</b> | <b>Ir(Me)-CYP119</b> | <b>(C317G,T213A)-<br/>Ir(Me)-CYP119</b> |
|--------------------|-----------------------|----------------------|-----------------------------------------|
| <b>A+Substrate</b> | 0.0                   | 0.0                  | 0.0                                     |
| <b>B</b>           | -                     | -13.9                | -12.2                                   |
| <b>TS(B-C)</b>     | 34.4                  | 3.3                  | 2.8                                     |
| <b>C</b>           | -                     | -20.6                | -17.7                                   |

## Coordinates of Optimized Geometries

---

### Substrate

---

Number of imaginary frequencies: 0    Electronic energy:    HF=-761.5076164  
Zero-point correction=                    0.219899 (Hartree/Particle)  
Thermal correction to Energy=            0.235519  
Thermal correction to Enthalpy=         0.236463  
Thermal correction to Gibbs Free Energy= 0.175535  
Sum of electronic and zero-point Energies= -761.287718  
Sum of electronic and thermal Energies= -761.272097  
Sum of electronic and thermal Enthalpies= -761.271153  
Sum of electronic and thermal Free Energies= -761.332082

---

### Cartesian Coordinates

---

|   |           |           |           |
|---|-----------|-----------|-----------|
| 6 | -3.566408 | -1.563524 | 0.068343  |
| 6 | -2.475665 | -2.388899 | 0.328879  |
| 6 | -1.192049 | -1.845874 | 0.385229  |
| 6 | -0.970993 | -0.478001 | 0.169944  |
| 6 | -2.089051 | 0.346204  | -0.110445 |
| 6 | -3.376139 | -0.197003 | -0.149316 |
| 6 | 0.399314  | 0.073797  | 0.224139  |
| 7 | 0.600111  | 1.296552  | 0.674325  |
| 7 | 0.787090  | 2.348120  | 1.063158  |
| 8 | -1.815598 | 1.666452  | -0.335600 |
| 6 | -2.884152 | 2.543047  | -0.654016 |
| 6 | 1.610795  | -0.667264 | -0.157992 |
| 8 | 2.727152  | 0.089233  | -0.006375 |
| 8 | 1.625069  | -1.816296 | -0.559250 |
| 1 | -0.340075 | -2.485100 | 0.578536  |
| 1 | -2.616616 | -3.452768 | 0.494958  |
| 1 | -4.230495 | 0.436265  | -0.358540 |
| 1 | -4.571786 | -1.973758 | 0.029510  |
| 1 | -2.429255 | 3.523581  | -0.805283 |
| 1 | -3.397395 | 2.232979  | -1.573452 |
| 1 | -3.612987 | 2.603308  | 0.164674  |
| 6 | 3.972243  | -0.554230 | -0.355022 |
| 1 | 4.089794  | -1.453499 | 0.258288  |
| 1 | 3.925968  | -0.871539 | -1.401754 |
| 6 | 5.084025  | 0.450092  | -0.112979 |
| 1 | 6.050593  | 0.001191  | -0.366746 |
| 1 | 4.945600  | 1.343342  | -0.730572 |
| 1 | 5.111740  | 0.758126  | 0.937221  |

---

### 1CSSA<sub>Fe(his)</sub>

---

Number of imaginary frequencies: 0    Electronic energy:    HF=-2184.5514934

|                                              |                             |
|----------------------------------------------|-----------------------------|
| Zero-point correction=                       | 0.671040 (Hartree/Particle) |
| Thermal correction to Energy=                | 0.716869                    |
| Thermal correction to Enthalpy=              | 0.717813                    |
| Thermal correction to Gibbs Free Energy=     | 0.586983                    |
| Sum of electronic and zero-point Energies=   | -2183.880453                |
| Sum of electronic and thermal Energies=      | -2183.834624                |
| Sum of electronic and thermal Enthalpies=    | -2183.833680                |
| Sum of electronic and thermal Free Energies= | -2183.964511                |

.....  
Cartesian Coordinates  
.....

|   |           |           |           |
|---|-----------|-----------|-----------|
| 6 | -1.670072 | -3.422859 | -0.615443 |
| 6 | -0.364057 | -2.785306 | -0.571814 |
| 7 | -0.485933 | -1.425306 | -0.409547 |
| 6 | -1.834649 | -1.182355 | -0.352140 |
| 6 | -2.591713 | -2.420249 | -0.479794 |
| 6 | 0.841265  | -3.464779 | -0.688662 |
| 6 | 2.107492  | -2.884484 | -0.695908 |
| 7 | 2.357992  | -1.541281 | -0.539869 |
| 6 | 3.721546  | -1.404596 | -0.620941 |
| 6 | 4.354813  | -2.697984 | -0.866846 |
| 6 | 3.336912  | -3.623958 | -0.882154 |
| 6 | 4.407725  | -0.212563 | -0.426914 |
| 6 | 3.836985  | 1.041019  | -0.238618 |
| 7 | 2.484774  | 1.290626  | -0.194761 |
| 6 | 2.364282  | 2.647144  | -0.050478 |
| 6 | 3.675565  | 3.283366  | 0.012585  |
| 6 | 4.598533  | 2.267680  | -0.107520 |
| 6 | 1.153956  | 3.328050  | 0.041591  |
| 6 | -0.108395 | 2.752294  | -0.016234 |
| 7 | -0.354918 | 1.404682  | -0.125208 |
| 6 | -1.721655 | 1.281402  | -0.133727 |
| 6 | -2.361716 | 2.586018  | -0.035771 |
| 6 | -1.351095 | 3.505353  | 0.039387  |
| 6 | -1.446681 | 4.998525  | 0.144219  |
| 6 | -3.844115 | 2.831420  | -0.058568 |
| 6 | -4.427200 | 2.840091  | -1.482590 |
| 6 | -5.924917 | 3.055638  | -1.498125 |
| 8 | -6.639091 | 3.175983  | -0.526270 |
| 6 | -2.408808 | 0.076627  | -0.218914 |
| 6 | 6.092121  | 2.374778  | -0.164795 |
| 6 | 3.887412  | 4.722043  | 0.131673  |
| 6 | 4.936049  | 5.341266  | 0.697591  |
| 6 | 3.428024  | -5.102247 | -1.117412 |
| 6 | 5.774832  | -2.979685 | -1.071534 |
| 6 | 6.675246  | -2.213199 | -1.706184 |
| 6 | -4.090163 | -2.530067 | -0.444894 |
| 6 | -4.657574 | -2.520224 | 0.985469  |
| 6 | -6.167091 | -2.623319 | 1.016671  |
| 8 | -6.897690 | -2.702645 | 0.053429  |

|    |           |           |           |
|----|-----------|-----------|-----------|
| 6  | -1.901710 | -4.894022 | -0.794752 |
| 8  | -6.408633 | 3.100007  | -2.765134 |
| 8  | -6.640084 | -2.618541 | 2.289251  |
| 1  | 1.197027  | 4.405073  | 0.161024  |
| 1  | -3.492481 | 0.125094  | -0.199853 |
| 1  | 0.791684  | -4.541730 | -0.813832 |
| 1  | 5.488813  | -0.269199 | -0.427885 |
| 1  | 6.528196  | 1.611258  | -0.817774 |
| 1  | 6.394426  | 3.355889  | -0.545761 |
| 1  | 6.555435  | 2.254423  | 0.824650  |
| 1  | 4.467180  | -5.443728 | -1.120943 |
| 1  | 2.894027  | -5.670981 | -0.345423 |
| 1  | 2.991082  | -5.386264 | -2.084235 |
| 1  | -1.409448 | -5.273550 | -1.699201 |
| 1  | -1.509877 | -5.476736 | 0.050014  |
| 1  | -2.968003 | -5.123311 | -0.882248 |
| 1  | -2.485589 | 5.325612  | 0.249063  |
| 1  | -0.893270 | 5.381250  | 1.011418  |
| 1  | -1.034017 | 5.496708  | -0.743162 |
| 1  | 3.101711  | 5.350548  | -0.288032 |
| 1  | 5.000940  | 6.425565  | 0.711918  |
| 1  | 5.744707  | 4.800161  | 1.178828  |
| 1  | 6.116262  | -3.942714 | -0.689488 |
| 1  | 7.708874  | -2.532951 | -1.803765 |
| 1  | 6.411032  | -1.268317 | -2.171143 |
| 1  | -4.372898 | 2.075115  | 0.532824  |
| 1  | -4.076363 | 3.788515  | 0.420482  |
| 1  | -3.960246 | 3.622023  | -2.094387 |
| 1  | -4.212922 | 1.898078  | -2.003214 |
| 1  | -7.372249 | 3.230443  | -2.680349 |
| 1  | -4.415179 | -3.449376 | -0.943081 |
| 1  | -4.551783 | -1.713530 | -1.011978 |
| 1  | -4.246226 | -3.348839 | 1.575941  |
| 1  | -4.365846 | -1.608192 | 1.521225  |
| 1  | -7.611390 | -2.679800 | 2.214043  |
| 7  | 1.073261  | -0.304003 | 1.778646  |
| 6  | 1.088651  | -1.458187 | 2.423354  |
| 6  | 1.115374  | 0.690843  | 2.735144  |
| 7  | 1.138984  | -1.243951 | 3.762703  |
| 1  | 1.065470  | -2.432806 | 1.961390  |
| 6  | 1.156981  | 0.121007  | 3.978481  |
| 1  | 1.113884  | 1.732692  | 2.456691  |
| 1  | 1.162359  | -1.962004 | 4.471013  |
| 1  | 1.196915  | 0.548368  | 4.967994  |
| 26 | 1.005373  | -0.082826 | -0.171127 |

---

$1\text{CSS}\mathbf{B}_{\text{Fe}(\text{his})}$

---

Number of imaginary frequencies: 0    Electronic energy:    HF=-2946.0694272  
Zero-point correction=                      0.893678 (Hartree/Particle)

|                                              |              |
|----------------------------------------------|--------------|
| Thermal correction to Energy=                | 0.956372     |
| Thermal correction to Enthalpy=              | 0.957316     |
| Thermal correction to Gibbs Free Energy=     | 0.788964     |
| Sum of electronic and zero-point Energies=   | -2945.175749 |
| Sum of electronic and thermal Energies=      | -2945.113056 |
| Sum of electronic and thermal Enthalpies=    | -2945.112111 |
| Sum of electronic and thermal Free Energies= | -2945.280463 |

.....  
Cartesian Coordinates  
.....

|   |           |           |           |
|---|-----------|-----------|-----------|
| 6 | 3.068830  | 2.086458  | 2.183004  |
| 6 | 2.474433  | 0.839226  | 1.746199  |
| 7 | 1.190617  | 1.035054  | 1.297180  |
| 6 | 0.943544  | 2.376992  | 1.449246  |
| 6 | 2.123230  | 3.061924  | 1.973285  |
| 6 | 3.136928  | -0.382602 | 1.765734  |
| 6 | 2.661358  | -1.580885 | 1.246924  |
| 7 | 1.427340  | -1.745559 | 0.676162  |
| 6 | 1.386273  | -3.051534 | 0.247506  |
| 6 | 2.624621  | -3.739735 | 0.551358  |
| 6 | 3.424742  | -2.825153 | 1.201701  |
| 6 | 0.291961  | -3.645999 | -0.375982 |
| 6 | -0.923710 | -3.032098 | -0.647761 |
| 7 | -1.232824 | -1.729776 | -0.335325 |
| 6 | -2.530770 | -1.551619 | -0.744993 |
| 6 | -3.062750 | -2.775324 | -1.332019 |
| 6 | -2.054546 | -3.698519 | -1.276948 |
| 7 | -1.485414 | 1.027178  | 0.344083  |
| 6 | -2.756082 | 0.837992  | -0.139921 |
| 6 | -3.515997 | 2.077908  | -0.088567 |
| 6 | -2.679486 | 3.023458  | 0.446112  |
| 6 | -1.417422 | 2.351436  | 0.703786  |
| 6 | -3.244986 | -0.363441 | -0.641278 |
| 6 | -0.288430 | 2.979753  | 1.220216  |
| 8 | 5.632254  | -0.750668 | -1.355332 |
| 6 | 5.120257  | 0.505861  | -1.280659 |
| 8 | 5.627140  | 1.403217  | -0.627017 |
| 6 | 3.904120  | 0.639160  | -2.090609 |
| 7 | 3.539585  | -0.458724 | -2.727932 |
| 7 | 3.249246  | -1.412057 | -3.271769 |
| 6 | 3.147855  | 1.894265  | -2.288405 |
| 6 | 3.800002  | 3.133215  | -2.202640 |
| 6 | 3.114141  | 4.329514  | -2.411982 |
| 6 | 1.757799  | 4.304447  | -2.727047 |
| 6 | 1.081623  | 3.085759  | -2.814785 |
| 6 | 1.761410  | 1.886324  | -2.585236 |
| 8 | 1.161704  | 0.659950  | -2.626961 |
| 6 | -0.187311 | 0.567776  | -3.074364 |
| 1 | -0.371332 | 4.032567  | 1.462066  |
| 1 | -4.267634 | -0.372636 | -0.998376 |

|   |           |           |           |
|---|-----------|-----------|-----------|
| 1 | 0.391948  | -4.686439 | -0.665709 |
| 1 | 4.133774  | -0.383172 | 2.191073  |
| 1 | 4.853473  | 3.148903  | -1.955014 |
| 1 | 3.646022  | 5.273316  | -2.336004 |
| 1 | 0.022776  | 3.074121  | -3.044308 |
| 1 | 1.215210  | 5.229135  | -2.905544 |
| 1 | -0.426863 | -0.495846 | -3.066716 |
| 1 | -0.868550 | 1.089682  | -2.394519 |
| 1 | -0.290584 | 0.968372  | -4.091385 |
| 6 | 6.870561  | -0.990057 | -0.652382 |
| 1 | 6.845112  | -2.056359 | -0.416508 |
| 1 | 6.867481  | -0.413926 | 0.276093  |
| 6 | 8.072069  | -0.630753 | -1.514838 |
| 1 | 8.086228  | 0.442558  | -1.726012 |
| 1 | 8.999171  | -0.890193 | -0.990200 |
| 1 | 8.048587  | -1.177944 | -2.463054 |
| 6 | 4.483393  | 2.249940  | 2.649565  |
| 1 | 4.657223  | 3.251031  | 3.055521  |
| 1 | 4.742542  | 1.524283  | 3.430941  |
| 1 | 5.181839  | 2.104959  | 1.815346  |
| 6 | 2.948675  | -5.152708 | 0.171606  |
| 1 | 4.020092  | -5.263423 | -0.027365 |
| 1 | 2.692739  | -5.868326 | 0.966092  |
| 1 | 2.409603  | -5.462569 | -0.729563 |
| 6 | 2.293198  | 4.493386  | 2.216408  |
| 6 | 1.798933  | 5.504640  | 1.485677  |
| 1 | 2.923408  | 4.747840  | 3.069716  |
| 1 | 1.997616  | 6.537575  | 1.758069  |
| 1 | 1.224229  | 5.338591  | 0.579627  |
| 6 | 4.774769  | -2.978959 | 1.727882  |
| 6 | 5.383781  | -4.116651 | 2.104526  |
| 1 | 5.343971  | -2.056578 | 1.834405  |
| 1 | 6.404345  | -4.101419 | 2.476594  |
| 1 | 4.891931  | -5.083403 | 2.083134  |
| 6 | -2.950961 | 4.474449  | 0.713800  |
| 1 | -3.938942 | 4.772996  | 0.349360  |
| 1 | -2.916024 | 4.705298  | 1.786938  |
| 1 | -2.210849 | 5.121924  | 0.226848  |
| 6 | -4.937173 | 2.250361  | -0.547587 |
| 1 | -5.122775 | 3.301155  | -0.797595 |
| 1 | -5.116294 | 1.672753  | -1.461646 |
| 6 | -4.468003 | -2.932717 | -1.845497 |
| 1 | -4.519761 | -3.786780 | -2.528999 |
| 1 | -4.740445 | -2.054216 | -2.438123 |
| 6 | -5.521467 | -3.131142 | -0.713102 |
| 1 | -5.064430 | -2.864965 | 0.249423  |
| 1 | -5.835718 | -4.174455 | -0.631559 |
| 6 | -5.980149 | 1.806278  | 0.520487  |
| 1 | -5.841872 | 0.746599  | 0.745050  |
| 1 | -5.838773 | 2.389054  | 1.434746  |

|    |           |           |           |
|----|-----------|-----------|-----------|
| 6  | -6.780167 | -2.285087 | -0.806350 |
| 8  | -7.891906 | -2.660666 | -0.504907 |
| 8  | -6.504628 | -1.019500 | -1.195686 |
| 1  | -7.296311 | -0.439645 | -1.081455 |
| 6  | -7.387031 | 2.002667  | 0.011304  |
| 8  | -8.037043 | 1.202066  | -0.642953 |
| 8  | -7.881140 | 3.220785  | 0.310457  |
| 1  | -8.769611 | 3.267330  | -0.093279 |
| 6  | -2.057038 | -5.122682 | -1.747439 |
| 1  | -1.919962 | -5.827164 | -0.916117 |
| 1  | -3.000272 | -5.379433 | -2.239141 |
| 1  | -1.248976 | -5.314127 | -2.465040 |
| 7  | -0.721723 | -0.860959 | 2.408858  |
| 6  | -1.017206 | -0.004397 | 3.371632  |
| 6  | -0.943939 | -2.126099 | 2.914728  |
| 7  | -1.424530 | -0.671902 | 4.481187  |
| 1  | -0.946376 | 1.069470  | 3.296526  |
| 6  | -1.382664 | -2.025902 | 4.207032  |
| 1  | -0.768769 | -3.004558 | 2.314292  |
| 1  | -1.699706 | -0.246198 | 5.353511  |
| 1  | -1.659555 | -2.771093 | 4.936051  |
| 26 | -0.066669 | -0.387448 | 0.620305  |

---

**<sup>1</sup>CCS<sup>S</sup>TS(B-C)<sub>Fe(his)</sub>**

---

Number of imaginary frequencies: 1    Electronic energy:    HF=-2946.0186418  
Zero-point correction=                    0.890263 (Hartree/Particle)  
Thermal correction to Energy=            0.952599  
Thermal correction to Enthalpy=         0.953543  
Thermal correction to Gibbs Free Energy= 0.789974  
Sum of electronic and zero-point Energies= -2945.128379  
Sum of electronic and thermal Energies= -2945.066043  
Sum of electronic and thermal Enthalpies= -2945.065099  
Sum of electronic and thermal Free Energies= -2945.228668

.....  
Cartesian Coordinates

.....  

|   |           |           |           |
|---|-----------|-----------|-----------|
| 6 | 3.122529  | -3.742782 | -0.686685 |
| 6 | 1.914788  | -3.022221 | -0.332748 |
| 7 | 2.062798  | -1.674259 | -0.565136 |
| 6 | 3.315610  | -1.517390 | -1.094486 |
| 6 | 4.001029  | -2.804411 | -1.184413 |
| 6 | 0.734371  | -3.630835 | 0.096131  |
| 6 | -0.490732 | -2.994901 | 0.281682  |
| 7 | -0.696563 | -1.644931 | 0.169078  |
| 6 | -2.045960 | -1.453531 | 0.301077  |
| 6 | -2.723352 | -2.726550 | 0.520995  |
| 6 | -1.748873 | -3.689585 | 0.523213  |
| 6 | -2.689752 | -0.220056 | 0.255376  |
| 6 | -2.084444 | 1.018525  | 0.062006  |

|   |           |           |           |
|---|-----------|-----------|-----------|
| 7 | -0.750871 | 1.214524  | -0.168240 |
| 6 | -0.589155 | 2.559764  | -0.363263 |
| 6 | -1.858941 | 3.255707  | -0.209336 |
| 6 | -2.795205 | 2.292428  | 0.056279  |
| 6 | 0.603778  | 3.181226  | -0.722638 |
| 6 | 1.813050  | 2.539821  | -0.986130 |
| 7 | 2.005278  | 1.188485  | -0.911943 |
| 6 | 3.250467  | 0.945954  | -1.426095 |
| 6 | 3.884633  | 2.183163  | -1.839675 |
| 6 | 3.006890  | 3.195714  | -1.524312 |
| 6 | 3.854204  | -0.305921 | -1.518095 |
| 1 | 0.574304  | 4.252883  | -0.876496 |
| 1 | 4.841613  | -0.335883 | -1.966433 |
| 1 | 0.751136  | -4.709265 | 0.215452  |
| 1 | -3.764027 | -0.222675 | 0.396756  |
| 6 | 1.066264  | 0.188968  | 1.777337  |
| 6 | 1.461030  | 1.560634  | 2.258786  |
| 6 | 0.484820  | 2.421316  | 2.794294  |
| 6 | 2.778152  | 2.080945  | 2.141836  |
| 6 | 0.778310  | 3.728237  | 3.182980  |
| 1 | -0.528768 | 2.058190  | 2.883173  |
| 6 | 3.077488  | 3.381968  | 2.560005  |
| 6 | 2.078502  | 4.209233  | 3.072523  |
| 1 | -0.013784 | 4.357005  | 3.579542  |
| 1 | 4.089709  | 3.757645  | 2.474542  |
| 1 | 2.327438  | 5.220401  | 3.383904  |
| 6 | 0.025882  | -0.470264 | 2.664775  |
| 8 | -1.062760 | 0.027218  | 2.876684  |
| 8 | 0.387922  | -1.665286 | 3.171051  |
| 8 | 3.728201  | 1.239917  | 1.649345  |
| 6 | 5.074217  | 1.677435  | 1.563613  |
| 1 | 5.628499  | 0.836034  | 1.144408  |
| 1 | 5.166646  | 2.541886  | 0.895903  |
| 1 | 5.479642  | 1.929041  | 2.552557  |
| 7 | 3.201616  | -1.679310 | 2.050670  |
| 7 | 2.492271  | -0.844509 | 2.228820  |
| 6 | -4.265157 | 2.480312  | 0.308246  |
| 1 | -4.602742 | 1.795137  | 1.095311  |
| 1 | -4.455926 | 3.493785  | 0.676129  |
| 6 | -5.145082 | 2.260411  | -0.952306 |
| 1 | -5.060855 | 1.233291  | -1.310710 |
| 1 | -4.802246 | 2.933184  | -1.746633 |
| 6 | -6.587855 | 2.609456  | -0.666376 |
| 8 | -6.998871 | 3.693315  | -0.323118 |
| 8 | -7.443344 | 1.546135  | -0.816490 |
| 1 | -8.333976 | 1.887550  | -0.604527 |
| 6 | -4.213692 | -2.883919 | 0.641345  |
| 1 | -4.617028 | -2.078839 | 1.262322  |
| 1 | -4.455962 | -3.818861 | 1.158377  |
| 6 | -4.934713 | -2.872391 | -0.741067 |



|    |           |           |           |
|----|-----------|-----------|-----------|
| 1  | -4.273790 | -2.397638 | -1.477984 |
| 1  | -5.140445 | -3.884213 | -1.098177 |
| 6  | -6.231822 | -2.090166 | -0.801623 |
| 8  | -7.251129 | -2.447189 | -1.349969 |
| 8  | -6.100010 | -0.874153 | -0.215602 |
| 1  | -6.890741 | -0.330114 | -0.414552 |
| 6  | -1.897565 | -5.173345 | 0.691332  |
| 1  | -2.925442 | -5.444138 | 0.952660  |
| 1  | -1.640397 | -5.718566 | -0.226998 |
| 1  | -1.244534 | -5.561699 | 1.483495  |
| 6  | -2.041038 | 4.740013  | -0.322130 |
| 1  | -1.803607 | 5.104881  | -1.330343 |
| 1  | -3.071144 | 5.037189  | -0.102604 |
| 1  | -1.385155 | 5.278377  | 0.373965  |
| 6  | 3.342261  | -5.212789 | -0.492853 |
| 1  | 2.785278  | -5.591903 | 0.370891  |
| 1  | 3.028482  | -5.803838 | -1.365402 |
| 1  | 4.403817  | -5.425400 | -0.327018 |
| 6  | 5.251707  | 2.293352  | -2.447522 |
| 1  | 6.037856  | 1.964485  | -1.753913 |
| 1  | 5.344378  | 1.673222  | -3.348271 |
| 1  | 5.482803  | 3.324714  | -2.729653 |
| 6  | 5.364548  | -2.977083 | -1.672292 |
| 6  | 5.896134  | -4.076645 | -2.231554 |
| 1  | 6.014868  | -2.108760 | -1.565049 |
| 1  | 6.937688  | -4.095954 | -2.539745 |
| 1  | 5.318415  | -4.975968 | -2.420019 |
| 6  | 3.238267  | 4.627480  | -1.706242 |
| 6  | 2.813986  | 5.622195  | -0.910621 |
| 1  | 3.852759  | 4.896801  | -2.566483 |
| 1  | 3.050591  | 6.657703  | -1.139657 |
| 1  | 2.248804  | 5.437113  | -0.002067 |
| 6  | -0.623531 | -2.359627 | 3.938859  |
| 1  | -0.973320 | -1.700054 | 4.738947  |
| 1  | -1.468986 | -2.576542 | 3.280505  |
| 6  | 0.015335  | -3.625687 | 4.479263  |
| 1  | 0.865720  | -3.392032 | 5.128371  |
| 1  | -0.719015 | -4.190898 | 5.063987  |
| 1  | 0.370061  | -4.259954 | 3.660547  |
| 7  | 0.135859  | -0.458919 | -2.277852 |
| 6  | -0.011274 | -1.613800 | -2.900526 |
| 6  | -0.128665 | 0.524341  | -3.209527 |
| 7  | -0.361623 | -1.414996 | -4.197740 |
| 1  | 0.125193  | -2.587205 | -2.456109 |
| 6  | -0.440093 | -0.051307 | -4.411677 |
| 1  | -0.074442 | 1.568798  | -2.947428 |
| 1  | -0.524893 | -2.139058 | -4.881116 |
| 1  | -0.701365 | 0.368236  | -5.370618 |
| 26 | 0.686053  | -0.215412 | -0.282273 |

1CSSC<sub>Fe(his)</sub>

-----  
Number of imaginary frequencies: 0    Electronic energy:    HF=-2946.0612815  
Zero-point correction=                    0.889470 (Hartree/Particle)  
Thermal correction to Energy=            0.953959  
Thermal correction to Enthalpy=           0.954903  
Thermal correction to Gibbs Free Energy=    0.781196  
Sum of electronic and zero-point Energies=    -2945.171811  
Sum of electronic and thermal Energies=    -2945.107322  
Sum of electronic and thermal Enthalpies=    -2945.106378  
Sum of electronic and thermal Free Energies=   -2945.280086  
-----

Cartesian Coordinates

-----  
6    3.259159 -3.128148 -1.278785  
6    2.018641 -2.576872 -0.770459  
7    1.997552 -1.212624 -0.915943  
6    3.171397 -0.872404 -1.526741  
6    3.976331 -2.064044 -1.784968  
6    0.950827 -3.349069 -0.312868  
6    -0.321729 -2.873062 -0.017798  
7    -0.677471 -1.549861 -0.015660  
6    -2.028282 -1.518119 0.199913  
6    -2.553058 -2.870394 0.345505  
6    -1.482704 -3.717075 0.226980  
6    -2.794385 -0.361384 0.304042  
6    -2.316977 0.942659 0.231037  
7    -1.022407 1.295575 -0.031026  
6    -0.978393 2.664656 0.003377  
6    -2.293983 3.206235 0.308796  
6    -3.131621 2.131399 0.445182  
6    0.142355 3.441735 -0.273097  
6    1.380438 2.961201 -0.694916  
7    1.678084 1.638082 -0.858857  
6    2.887753 1.590585 -1.498552  
6    3.393091 2.928189 -1.737619  
6    2.475032 3.795127 -1.190581  
6    3.562721 0.424326 -1.844824  
1    0.018306 4.517184 -0.238720  
1    4.500026 0.544365 -2.377038  
1    1.098768 -4.423026 -0.273892  
1    -3.853290 -0.487578 0.493898  
6    0.941717 0.212682 1.436543  
6    1.799319 1.207204 2.118997  
6    1.188155 2.194036 2.917028  
6    3.212817 1.221898 2.007757  
6    1.929234 3.217474 3.506345  
1    0.111094 2.162219 3.036904  
6    3.955365 2.241766 2.613640  
6    3.312791 3.242289 3.345669

|   |           |           |           |
|---|-----------|-----------|-----------|
| 1 | 1.425936  | 3.982003  | 4.091214  |
| 1 | 5.035235  | 2.256875  | 2.526452  |
| 1 | 3.906313  | 4.029373  | 3.803357  |
| 6 | 0.088069  | -0.495127 | 2.448975  |
| 8 | -0.942921 | -0.042156 | 2.909921  |
| 8 | 0.634107  | -1.663465 | 2.835838  |
| 8 | 3.774645  | 0.170862  | 1.355000  |
| 6 | 5.185178  | 0.131692  | 1.219917  |
| 1 | 5.401805  | -0.777062 | 0.657647  |
| 1 | 5.558780  | 1.000703  | 0.663043  |
| 1 | 5.679471  | 0.084629  | 2.198948  |
| 7 | 3.893217  | -3.493598 | 2.333758  |
| 7 | 4.198830  | -2.639605 | 2.964989  |
| 6 | -4.598306 | 2.140443  | 0.774193  |
| 1 | -4.832094 | 1.329495  | 1.474449  |
| 1 | -4.861276 | 3.074451  | 1.281357  |
| 6 | -5.516251 | 2.001199  | -0.471434 |
| 1 | -5.357868 | 1.040171  | -0.963628 |
| 1 | -5.275678 | 2.799979  | -1.181504 |
| 6 | -6.967679 | 2.171148  | -0.084953 |
| 8 | -7.467107 | 3.177360  | 0.361513  |
| 8 | -7.714404 | 1.033371  | -0.266023 |
| 1 | -8.620010 | 1.258554  | 0.023483  |
| 6 | -4.009341 | -3.196495 | 0.528490  |
| 1 | -4.447369 | -2.509121 | 1.258523  |
| 1 | -4.121986 | -4.201089 | 0.949998  |
| 6 | -4.819694 | -3.114270 | -0.801682 |
| 1 | -4.253350 | -2.508972 | -1.521388 |
| 1 | -4.960979 | -4.100421 | -1.249975 |
| 6 | -6.181004 | -2.454529 | -0.702738 |
| 8 | -7.203958 | -2.856740 | -1.211344 |
| 8 | -6.111690 | -1.286776 | -0.016168 |
| 1 | -6.960712 | -0.805173 | -0.105334 |
| 6 | -1.461215 | -5.216251 | 0.283183  |
| 1 | -2.438867 | -5.619346 | 0.565401  |
| 1 | -1.193687 | -5.658589 | -0.685983 |
| 1 | -0.730170 | -5.586156 | 1.013494  |
| 6 | -2.610154 | 4.667220  | 0.432693  |
| 1 | -2.488704 | 5.193285  | -0.523678 |
| 1 | -3.640573 | 4.828305  | 0.763806  |
| 1 | -1.950008 | 5.163869  | 1.154847  |
| 6 | 3.651015  | -4.573793 | -1.222047 |
| 1 | 3.226695  | -5.069986 | -0.343135 |
| 1 | 3.317596  | -5.133944 | -2.107588 |
| 1 | 4.740056  | -4.676353 | -1.169612 |
| 6 | 4.698387  | 3.254444  | -2.399956 |
| 1 | 5.556021  | 2.931781  | -1.793702 |
| 1 | 4.792319  | 2.760965  | -3.375562 |
| 1 | 4.806937  | 4.331034  | -2.560950 |
| 6 | 5.289500  | -2.047066 | -2.419891 |

|    |           |           |           |
|----|-----------|-----------|-----------|
| 6  | 5.881884  | -3.045066 | -3.096846 |
| 1  | 5.842066  | -1.111660 | -2.332185 |
| 1  | 6.877522  | -2.919283 | -3.512772 |
| 1  | 5.398080  | -3.999207 | -3.279140 |
| 6  | 2.583754  | 5.251253  | -1.132773 |
| 6  | 2.159996  | 6.048584  | -0.139879 |
| 1  | 3.096367  | 5.718834  | -1.974544 |
| 1  | 2.296289  | 7.125270  | -0.191134 |
| 1  | 1.698045  | 5.654607  | 0.760610  |
| 6  | -0.127010 | -2.415348 | 3.811987  |
| 1  | -0.331312 | -1.772330 | 4.673520  |
| 1  | -1.085869 | -2.692182 | 3.362878  |
| 6  | 0.691190  | -3.634698 | 4.193123  |
| 1  | 1.644511  | -3.342253 | 4.644449  |
| 1  | 0.137120  | -4.239898 | 4.919610  |
| 1  | 0.901373  | -4.252603 | 3.314336  |
| 7  | -0.128184 | -0.002014 | -2.425130 |
| 6  | -0.199125 | -1.079051 | -3.182436 |
| 6  | -0.540540 | 1.053290  | -3.210858 |
| 7  | -0.642093 | -0.762750 | -4.428255 |
| 1  | 0.058563  | -2.080400 | -2.872582 |
| 6  | -0.864873 | 0.601688  | -4.462363 |
| 1  | -0.572483 | 2.058060  | -2.818987 |
| 1  | -0.775234 | -1.410049 | -5.190907 |
| 1  | -1.220698 | 1.105261  | -5.347797 |
| 26 | 0.541388  | 0.046168  | -0.323976 |

---

**<sup>1</sup>ICSS<sup>†</sup>TS(C-P)<sub>Fe(his)</sub>**

---

Number of imaginary frequencies: 1    Electronic energy:    HF=-2836.5129554  
Zero-point correction=                    0.878137 (Hartree/Particle)  
Thermal correction to Energy=            0.937272  
Thermal correction to Enthalpy=         0.938216  
Thermal correction to Gibbs Free Energy= 0.781514  
Sum of electronic and zero-point Energies= -2835.634818  
Sum of electronic and thermal Energies= -2835.575684  
Sum of electronic and thermal Enthalpies= -2835.574740  
Sum of electronic and thermal Free Energies= -2835.731442

.....  
Cartesian Coordinates

.....  

|   |           |           |           |
|---|-----------|-----------|-----------|
| 6 | 3.499470  | -3.311954 | -0.973347 |
| 6 | 2.213434  | -2.758579 | -0.605657 |
| 7 | 2.227494  | -1.385863 | -0.689714 |
| 6 | 3.483671  | -1.048276 | -1.117369 |
| 6 | 4.301859  | -2.241519 | -1.304881 |
| 6 | 1.112719  | -3.524930 | -0.245498 |
| 6 | -0.142148 | -3.037562 | 0.097778  |
| 7 | -0.489211 | -1.713973 | 0.152508  |
| 6 | -1.812765 | -1.682176 | 0.505925  |

|   |           |           |           |
|---|-----------|-----------|-----------|
| 6 | -2.321792 | -3.032604 | 0.694737  |
| 6 | -1.273886 | -3.878665 | 0.437794  |
| 6 | -2.579381 | -0.525063 | 0.597171  |
| 6 | -2.151319 | 0.763594  | 0.290977  |
| 7 | -0.872376 | 1.109763  | -0.060972 |
| 6 | -0.892580 | 2.457300  | -0.305200 |
| 6 | -2.225638 | 2.991286  | -0.112193 |
| 6 | -3.014920 | 1.933716  | 0.257388  |
| 6 | 0.200250  | 3.232914  | -0.675686 |
| 6 | 1.490246  | 2.768174  | -0.884612 |
| 7 | 1.855896  | 1.449403  | -0.839961 |
| 6 | 3.165333  | 1.404784  | -1.240514 |
| 6 | 3.660331  | 2.735065  | -1.534168 |
| 6 | 2.622732  | 3.600287  | -1.283599 |
| 6 | 3.922492  | 0.245882  | -1.375954 |
| 1 | 0.029004  | 4.291680  | -0.824362 |
| 1 | 4.938460  | 0.364623  | -1.734763 |
| 1 | 1.238219  | -4.601993 | -0.246099 |
| 1 | -3.616027 | -0.642792 | 0.890173  |
| 6 | -4.503078 | 1.946356  | 0.457918  |
| 1 | -4.822000 | 1.131650  | 1.116958  |
| 1 | -4.811141 | 2.878995  | 0.945137  |
| 6 | -5.252235 | 1.830079  | -0.903660 |
| 1 | -5.002224 | 0.877719  | -1.382165 |
| 1 | -4.940441 | 2.648411  | -1.556950 |
| 6 | -6.743444 | 1.942654  | -0.720980 |
| 8 | -7.413509 | 2.945021  | -0.781257 |
| 8 | -7.313605 | 0.729431  | -0.412484 |
| 1 | -8.264479 | 0.892882  | -0.263127 |
| 6 | -3.728883 | -3.426697 | 1.043494  |
| 1 | -4.182874 | -2.714038 | 1.740652  |
| 1 | -3.706536 | -4.387541 | 1.569286  |
| 6 | -4.670256 | -3.597945 | -0.188253 |
| 1 | -4.142698 | -4.103969 | -0.999918 |
| 1 | -5.531516 | -4.206091 | 0.110209  |
| 6 | -5.196583 | -2.277670 | -0.705304 |
| 8 | -4.832460 | -1.707962 | -1.718188 |
| 8 | -6.128979 | -1.778047 | 0.130082  |
| 1 | -6.456611 | -0.917437 | -0.214846 |
| 6 | -1.250272 | -5.378685 | 0.465259  |
| 1 | -2.179957 | -5.788562 | 0.871977  |
| 1 | -1.118779 | -5.804141 | -0.538737 |
| 1 | -0.427473 | -5.759666 | 1.083118  |
| 6 | -2.615001 | 4.427353  | -0.301876 |
| 1 | -2.499662 | 4.748414  | -1.345444 |
| 1 | -3.657769 | 4.601723  | -0.019027 |
| 1 | -1.993077 | 5.094550  | 0.307939  |
| 6 | 3.859054  | -4.766487 | -0.943842 |
| 1 | 3.316142  | -5.300425 | -0.156706 |
| 1 | 3.632180  | -5.270603 | -1.893894 |

|   |           |           |           |
|---|-----------|-----------|-----------|
| 1 | 4.930664  | -4.895079 | -0.758859 |
| 6 | 5.059703  | 3.060651  | -1.960972 |
| 1 | 5.783761  | 2.835785  | -1.166595 |
| 1 | 5.361213  | 2.484568  | -2.845097 |
| 1 | 5.165446  | 4.121935  | -2.203792 |
| 6 | 5.698709  | -2.223089 | -1.726457 |
| 6 | 6.354957  | -3.185119 | -2.395192 |
| 1 | 6.259041  | -1.325434 | -1.464972 |
| 1 | 7.407134  | -3.072771 | -2.640817 |
| 1 | 5.871275  | -4.094334 | -2.737834 |
| 6 | 2.660696  | 5.058435  | -1.393233 |
| 6 | 2.059878  | 5.938354  | -0.577862 |
| 1 | 3.273170  | 5.453008  | -2.205016 |
| 1 | 2.157709  | 7.007822  | -0.743062 |
| 1 | 1.488171  | 5.625241  | 0.290760  |
| 6 | 1.234999  | 0.130780  | 1.640945  |
| 6 | 1.289575  | 1.500408  | 2.254008  |
| 6 | 0.670252  | -0.884820 | 2.587449  |
| 6 | 0.157692  | 2.179377  | 2.735497  |
| 6 | 2.528385  | 2.163050  | 2.394839  |
| 8 | -0.359716 | -0.761302 | 3.225463  |
| 8 | 1.463768  | -1.986980 | 2.682532  |
| 6 | 0.250313  | 3.457936  | 3.286684  |
| 1 | -0.801523 | 1.680838  | 2.678645  |
| 6 | 2.634607  | 3.444950  | 2.928986  |
| 8 | 3.704338  | 1.563849  | 1.965819  |
| 6 | 1.486814  | 4.101494  | 3.371129  |
| 1 | -0.647532 | 3.948756  | 3.652996  |
| 1 | 3.617528  | 3.899928  | 3.002268  |
| 6 | 3.735693  | 0.198441  | 2.107153  |
| 1 | 1.564522  | 5.098159  | 3.797517  |
| 1 | 3.644119  | -0.174128 | 3.130244  |
| 1 | 4.497807  | -0.254474 | 1.480717  |
| 1 | 2.431496  | -0.166923 | 1.543174  |
| 7 | 0.046383  | -0.353177 | -2.347787 |
| 6 | -1.145976 | -0.757464 | -2.749630 |
| 6 | 0.775126  | -0.093613 | -3.489978 |
| 7 | -1.213191 | -0.767294 | -4.105636 |
| 1 | -1.973801 | -1.040493 | -2.117121 |
| 6 | 0.008364  | -0.346224 | -4.596079 |
| 1 | 1.795210  | 0.252647  | -3.433167 |
| 1 | -2.022082 | -1.033987 | -4.647464 |
| 1 | 0.211308  | -0.269726 | -5.652961 |
| 6 | 0.991498  | -3.048802 | 3.537081  |
| 1 | -0.094507 | -3.122615 | 3.443046  |
| 1 | 1.452122  | -3.952037 | 3.127562  |
| 6 | 1.403082  | -2.824151 | 4.985836  |
| 1 | 0.924568  | -1.924679 | 5.382996  |
| 1 | 1.096836  | -3.678883 | 5.601023  |
| 1 | 2.489922  | -2.714101 | 5.069790  |

26 0.707744 -0.118995 -0.259019

---

1OSSA<sub>Fe(his)</sub>

---

Number of imaginary frequencies: 0    Electronic energy:    HF=-2184.5545156  
Zero-point correction=                    0.670254 (Hartree/Particle)  
Thermal correction to Energy=            0.716454  
Thermal correction to Enthalpy=         0.717398  
Thermal correction to Gibbs Free Energy= 0.585380  
Sum of electronic and zero-point Energies= -2183.884261  
Sum of electronic and thermal Energies= -2183.838062  
Sum of electronic and thermal Enthalpies= -2183.837117  
Sum of electronic and thermal Free Energies= -2183.969135

.....  
Cartesian Coordinates

.....  
6    -1.672326 -3.421637 -0.645799  
6    -0.366107 -2.784963 -0.602863  
7    -0.489279 -1.427074 -0.430552  
6    -1.836367 -1.181733 -0.369314  
6    -2.593604 -2.419283 -0.500267  
6    0.839810 -3.463375 -0.725421  
6    2.107013 -2.883461 -0.726233  
7    2.358678 -1.542599 -0.560051  
6    3.720970 -1.402347 -0.635110  
6    4.355357 -2.694391 -0.885062  
6    3.337410 -3.621035 -0.911466  
6    4.405018 -0.208769 -0.435121  
6    3.834832 1.046244 -0.246603  
7    2.484239 1.299228 -0.205838  
6    2.362242 2.655057 -0.062770  
6    3.673788 3.289734 0.003954  
6    4.596578 2.272604 -0.112907  
6    1.150794 3.335756 0.027678  
6    -0.112167 2.759721 -0.028189  
7    -0.359270 1.412879 -0.136573  
6    -1.724310 1.285201 -0.142957  
6    -2.365563 2.589108 -0.041804  
6    -1.355835 3.510581 0.031442  
6    -1.454203 5.003548 0.136954  
6    -3.848219 2.832453 -0.062058  
6    -4.430720 2.842453 -1.486270  
6    -5.928196 3.059422 -1.502779  
8    -6.641934 3.186769 -0.531512  
6    -2.409726 0.078223 -0.230070  
6    6.090399 2.378883 -0.163356  
6    3.887136 4.728216 0.122860  
6    4.935850 5.346742 0.689351  
6    3.431165 -5.097669 -1.156062  
6    5.776490 -2.975842 -1.082954

|    |           |           |           |
|----|-----------|-----------|-----------|
| 6  | 6.680468  | -2.207623 | -1.710304 |
| 6  | -4.091520 | -2.531232 | -0.454029 |
| 6  | -4.644352 | -2.530213 | 0.981974  |
| 6  | -6.153487 | -2.632687 | 1.028639  |
| 8  | -6.894020 | -2.711197 | 0.072940  |
| 6  | -1.905791 | -4.891865 | -0.830784 |
| 8  | -6.411875 | 3.097013  | -2.769983 |
| 8  | -6.613067 | -2.628674 | 2.306099  |
| 1  | 1.193411  | 4.412698  | 0.147623  |
| 1  | -3.493491 | 0.125909  | -0.209063 |
| 1  | 0.790504  | -4.539432 | -0.857698 |
| 1  | 5.486062  | -0.265332 | -0.432446 |
| 1  | 6.529037  | 1.612598  | -0.811279 |
| 1  | 6.395387  | 3.358568  | -0.545933 |
| 1  | 6.548196  | 2.261802  | 0.829028  |
| 1  | 4.470585  | -5.438450 | -1.155163 |
| 1  | 2.892453  | -5.672191 | -0.391737 |
| 1  | 3.001196  | -5.375407 | -2.127814 |
| 1  | -1.422050 | -5.266713 | -1.741767 |
| 1  | -1.506470 | -5.479073 | 0.007275  |
| 1  | -2.972918 | -5.120566 | -0.909591 |
| 1  | -2.491821 | 5.327777  | 0.262186  |
| 1  | -0.885036 | 5.388714  | 0.992675  |
| 1  | -1.060705 | 5.502016  | -0.758969 |
| 1  | 3.102560  | 5.357323  | -0.297962 |
| 1  | 5.001622  | 6.430987  | 0.703066  |
| 1  | 5.743525  | 4.805446  | 1.171978  |
| 1  | 6.115521  | -3.940210 | -0.702171 |
| 1  | 7.714500  | -2.527481 | -1.803120 |
| 1  | 6.419366  | -1.261172 | -2.173880 |
| 1  | -4.374912 | 2.073672  | 0.527970  |
| 1  | -4.081907 | 3.788203  | 0.418834  |
| 1  | -3.962606 | 3.624667  | -2.096870 |
| 1  | -4.215983 | 1.900807  | -2.007182 |
| 1  | -7.375236 | 3.229846  | -2.686070 |
| 1  | -4.419631 | -3.448074 | -0.954705 |
| 1  | -4.559266 | -1.711885 | -1.011866 |
| 1  | -4.227291 | -3.363096 | 1.562416  |
| 1  | -4.345766 | -1.621994 | 1.520345  |
| 1  | -7.585099 | -2.690222 | 2.241299  |
| 7  | 1.073237  | -0.317081 | 1.879402  |
| 6  | 1.090648  | -1.471989 | 2.518644  |
| 6  | 1.116057  | 0.670036  | 2.841788  |
| 7  | 1.142620  | -1.268666 | 3.860220  |
| 1  | 1.067520  | -2.445395 | 2.052481  |
| 6  | 1.159879  | 0.096065  | 4.083719  |
| 1  | 1.113260  | 1.713801  | 2.568151  |
| 1  | 1.167661  | -1.989847 | 4.565761  |
| 1  | 1.200636  | 0.516330  | 5.076431  |
| 26 | 1.003321  | -0.080089 | -0.182213 |



-----  
**1OSSB<sub>Fe(his)</sub>**  
-----

Number of imaginary frequencies: 0    Electronic energy:    HF=-2946.0722852  
Zero-point correction=                    0.892586 (Hartree/Particle)  
Thermal correction to Energy=            0.955826  
Thermal correction to Enthalpy=           0.956770  
Thermal correction to Gibbs Free Energy=   0.785090  
Sum of electronic and zero-point Energies=   -2945.179699  
Sum of electronic and thermal Energies=   -2945.116460  
Sum of electronic and thermal Enthalpies=   -2945.115515  
Sum of electronic and thermal Free Energies=   -2945.287195

.....  
Cartesian Coordinates  
.....

|   |           |           |           |
|---|-----------|-----------|-----------|
| 6 | 3.045589  | 2.004454  | 2.230148  |
| 6 | 2.440090  | 0.771386  | 1.769242  |
| 7 | 1.160419  | 0.990495  | 1.321529  |
| 6 | 0.927797  | 2.332437  | 1.489699  |
| 6 | 2.111685  | 2.994532  | 2.032329  |
| 6 | 3.090735  | -0.457821 | 1.767100  |
| 6 | 2.603900  | -1.646915 | 1.234882  |
| 7 | 1.367504  | -1.798086 | 0.668026  |
| 6 | 1.312046  | -3.099084 | 0.227456  |
| 6 | 2.543984  | -3.801260 | 0.523846  |
| 6 | 3.355793  | -2.897555 | 1.176137  |
| 6 | 0.212907  | -3.673666 | -0.407302 |
| 6 | -0.991652 | -3.039951 | -0.685637 |
| 7 | -1.285211 | -1.736064 | -0.366744 |
| 6 | -2.573237 | -1.530969 | -0.791659 |
| 6 | -3.117160 | -2.741277 | -1.394825 |
| 6 | -2.125401 | -3.682584 | -1.333268 |
| 7 | -1.507298 | 1.027650  | 0.340387  |
| 6 | -2.772394 | 0.858376  | -0.162536 |
| 6 | -3.518162 | 2.106475  | -0.102059 |
| 6 | -2.677344 | 3.034979  | 0.456464  |
| 6 | -1.426081 | 2.345434  | 0.718852  |
| 6 | -3.269885 | -0.331575 | -0.684825 |
| 6 | -0.295232 | 2.953128  | 1.256126  |
| 8 | 5.735965  | -0.752116 | -1.377729 |
| 6 | 5.230492  | 0.504112  | -1.263244 |
| 8 | 5.713637  | 1.363572  | -0.544021 |
| 6 | 4.051899  | 0.687882  | -2.117095 |
| 7 | 3.708767  | -0.370566 | -2.828269 |
| 7 | 3.433230  | -1.288453 | -3.437144 |
| 6 | 3.302285  | 1.953367  | -2.267841 |
| 6 | 3.954305  | 3.184151  | -2.104545 |
| 6 | 3.271931  | 4.391312  | -2.254638 |
| 6 | 1.919658  | 4.385121  | -2.587592 |
| 6 | 1.243920  | 3.174363  | -2.754590 |

|   |           |           |           |
|---|-----------|-----------|-----------|
| 6 | 1.920606  | 1.962800  | -2.586282 |
| 8 | 1.325641  | 0.741205  | -2.711951 |
| 6 | -0.041412 | 0.676215  | -3.103824 |
| 1 | -0.368368 | 4.003381  | 1.511539  |
| 1 | -4.288104 | -0.321953 | -1.054574 |
| 1 | 0.299966  | -4.712985 | -0.704923 |
| 1 | 4.088595  | -0.473231 | 2.189687  |
| 1 | 5.004209  | 3.184283  | -1.841161 |
| 1 | 3.802633  | 5.328850  | -2.117781 |
| 1 | 0.188559  | 3.177374  | -2.999824 |
| 1 | 1.379638  | 5.319098  | -2.719569 |
| 1 | -0.283283 | -0.386055 | -3.152223 |
| 1 | -0.690755 | 1.156133  | -2.363872 |
| 1 | -0.190368 | 1.137087  | -4.089258 |
| 6 | 6.933297  | -1.041676 | -0.624595 |
| 1 | 6.883311  | -2.117474 | -0.441111 |
| 1 | 6.888904  | -0.509791 | 0.328920  |
| 6 | 8.182019  | -0.659172 | -1.406211 |
| 1 | 8.219579  | 0.422655  | -1.564526 |
| 1 | 9.077666  | -0.956198 | -0.847947 |
| 1 | 8.201142  | -1.160346 | -2.379601 |
| 6 | 4.457794  | 2.143608  | 2.711501  |
| 1 | 4.641203  | 3.137584  | 3.130493  |
| 1 | 4.699210  | 1.405625  | 3.487001  |
| 1 | 5.162534  | 1.998683  | 1.882682  |
| 6 | 2.853975  | -5.215079 | 0.135575  |
| 1 | 3.922744  | -5.332909 | -0.073619 |
| 1 | 2.600066  | -5.931549 | 0.929888  |
| 1 | 2.304266  | -5.517861 | -0.761514 |
| 6 | 2.295401  | 4.419103  | 2.304723  |
| 6 | 1.817500  | 5.449885  | 1.590723  |
| 1 | 2.921436  | 4.649897  | 3.167750  |
| 1 | 2.024624  | 6.475033  | 1.885252  |
| 1 | 1.248067  | 5.307760  | 0.677388  |
| 6 | 4.708115  | -3.066039 | 1.692297  |
| 6 | 5.309628  | -4.211066 | 2.058200  |
| 1 | 5.285980  | -2.149107 | 1.799548  |
| 1 | 6.332749  | -4.206799 | 2.423472  |
| 1 | 4.809197  | -5.173338 | 2.034954  |
| 6 | -2.936084 | 4.484547  | 0.743659  |
| 1 | -3.918793 | 4.798538  | 0.378087  |
| 1 | -2.905231 | 4.698882  | 1.820277  |
| 1 | -2.186544 | 5.131468  | 0.270575  |
| 6 | -4.932552 | 2.302243  | -0.572515 |
| 1 | -5.103291 | 3.358557  | -0.809336 |
| 1 | -5.109631 | 1.739908  | -1.496396 |
| 6 | -4.518721 | -2.872561 | -1.925516 |
| 1 | -4.575341 | -3.717571 | -2.619748 |
| 1 | -4.773101 | -1.983236 | -2.509580 |
| 6 | -5.586012 | -3.069300 | -0.805975 |

|    |           |           |           |
|----|-----------|-----------|-----------|
| 1  | -5.134899 | -2.821834 | 0.164338  |
| 1  | -5.916315 | -4.108767 | -0.739954 |
| 6  | -5.990034 | 1.855242  | 0.479835  |
| 1  | -5.865819 | 0.790927  | 0.690263  |
| 1  | -5.849799 | 2.422814  | 1.403748  |
| 6  | -6.831570 | -2.203773 | -0.899416 |
| 8  | -7.949185 | -2.564328 | -0.601286 |
| 8  | -6.536839 | -0.941071 | -1.283593 |
| 1  | -7.320170 | -0.350220 | -1.167301 |
| 6  | -7.389860 | 2.075697  | -0.038861 |
| 8  | -8.042012 | 1.293886  | -0.713397 |
| 8  | -7.873812 | 3.293544  | 0.277318  |
| 1  | -8.757884 | 3.356888  | -0.133742 |
| 6  | -2.147152 | -5.103139 | -1.814316 |
| 1  | -2.028115 | -5.815822 | -0.987279 |
| 1  | -3.090675 | -5.340754 | -2.315024 |
| 1  | -1.336915 | -5.302646 | -2.527324 |
| 7  | -0.826939 | -0.930204 | 2.501772  |
| 6  | -1.065284 | -0.084719 | 3.487144  |
| 6  | -1.119802 | -2.190135 | 2.980126  |
| 7  | -1.503699 | -0.751372 | 4.585900  |
| 1  | -0.932878 | 0.985560  | 3.438578  |
| 6  | -1.543523 | -2.099271 | 4.278655  |
| 1  | -1.001036 | -3.062265 | 2.355881  |
| 1  | -1.747844 | -0.332802 | 5.471206  |
| 1  | -1.859283 | -2.843470 | 4.993019  |
| 26 | -0.113045 | -0.416651 | 0.622631  |

---

**10SSC<sub>Fe(his)</sub>**

---

Number of imaginary frequencies: 0    Electronic energy:    HF=-2946.0635899  
Zero-point correction=                    0.888944 (Hartree/Particle)  
Thermal correction to Energy=            0.953584  
Thermal correction to Enthalpy=         0.954529  
Thermal correction to Gibbs Free Energy= 0.781092  
Sum of electronic and zero-point Energies= -2945.174646  
Sum of electronic and thermal Energies= -2945.110005  
Sum of electronic and thermal Enthalpies= -2945.109061  
Sum of electronic and thermal Free Energies= -2945.282498

.....  
Cartesian Coordinates

.....

|   |           |           |           |
|---|-----------|-----------|-----------|
| 6 | 3.253985  | -3.110596 | -1.292685 |
| 6 | 2.008538  | -2.561472 | -0.798280 |
| 7 | 1.991105  | -1.195150 | -0.935940 |
| 6 | 3.177506  | -0.853194 | -1.523433 |
| 6 | 3.981800  | -2.043774 | -1.778531 |
| 6 | 0.937957  | -3.335583 | -0.353495 |
| 6 | -0.333411 | -2.859004 | -0.056976 |
| 7 | -0.688996 | -1.535972 | -0.054527 |

|   |           |           |           |
|---|-----------|-----------|-----------|
| 6 | -2.037948 | -1.504133 | 0.174959  |
| 6 | -2.561432 | -2.855849 | 0.325519  |
| 6 | -1.492197 | -3.702478 | 0.197425  |
| 6 | -2.800935 | -0.347427 | 0.290611  |
| 6 | -2.319273 | 0.954896  | 0.220486  |
| 7 | -1.025215 | 1.305943  | -0.051043 |
| 6 | -0.977672 | 2.675185  | -0.005041 |
| 6 | -2.288583 | 3.217177  | 0.312986  |
| 6 | -3.128165 | 2.143157  | 0.449437  |
| 6 | 0.143414  | 3.453496  | -0.273860 |
| 6 | 1.382979  | 2.974114  | -0.688558 |
| 7 | 1.678183  | 1.651661  | -0.862961 |
| 6 | 2.900259  | 1.607458  | -1.478856 |
| 6 | 3.413661  | 2.945584  | -1.694785 |
| 6 | 2.488082  | 3.809378  | -1.156579 |
| 6 | 3.579374  | 0.443836  | -1.822950 |
| 1 | 0.021533  | 4.528661  | -0.229002 |
| 1 | 4.528110  | 0.565526  | -2.333614 |
| 1 | 1.085687  | -4.409437 | -0.316159 |
| 1 | -3.857830 | -0.471480 | 0.491999  |
| 6 | 0.953561  | 0.194636  | 1.440948  |
| 6 | 1.818318  | 1.189797  | 2.117852  |
| 6 | 1.216515  | 2.198808  | 2.892347  |
| 6 | 3.233011  | 1.168354  | 2.041989  |
| 6 | 1.970328  | 3.198579  | 3.507782  |
| 1 | 0.136153  | 2.194272  | 2.986136  |
| 6 | 3.989080  | 2.168230  | 2.664628  |
| 6 | 3.357432  | 3.185256  | 3.384085  |
| 1 | 1.473364  | 3.974975  | 4.082802  |
| 1 | 5.070887  | 2.154588  | 2.602993  |
| 1 | 3.961150  | 3.954636  | 3.858395  |
| 6 | 0.095647  | -0.518969 | 2.438522  |
| 8 | -0.930707 | -0.063777 | 2.910289  |
| 8 | 0.618467  | -1.706439 | 2.811158  |
| 8 | 3.784565  | 0.107709  | 1.388512  |
| 6 | 5.195031  | 0.041055  | 1.279578  |
| 1 | 5.405622  | -0.867609 | 0.714246  |
| 1 | 5.597960  | 0.906613  | 0.736961  |
| 1 | 5.672350  | -0.023536 | 2.266270  |
| 7 | 3.842065  | -3.569283 | 2.294140  |
| 7 | 4.147375  | -2.734698 | 2.950929  |
| 6 | -4.591508 | 2.153652  | 0.792423  |
| 1 | -4.817723 | 1.344987  | 1.497829  |
| 1 | -4.849961 | 3.089052  | 1.298993  |
| 6 | -5.520432 | 2.010163  | -0.444147 |
| 1 | -5.364040 | 1.049087  | -0.936730 |
| 1 | -5.288393 | 2.808341  | -1.158000 |
| 6 | -6.968968 | 2.177560  | -0.045214 |
| 8 | -7.462780 | 3.177899  | 0.420027  |
| 8 | -7.719767 | 1.044955  | -0.240937 |

|   |           |           |           |
|---|-----------|-----------|-----------|
| 1 | -8.623617 | 1.267732  | 0.055962  |
| 6 | -4.015107 | -3.182662 | 0.526211  |
| 1 | -4.446162 | -2.490455 | 1.255527  |
| 1 | -4.120722 | -4.183930 | 0.957199  |
| 6 | -4.840953 | -3.113675 | -0.795079 |
| 1 | -4.280830 | -2.521649 | -1.530598 |
| 1 | -4.993048 | -4.104815 | -1.228615 |
| 6 | -6.197957 | -2.445757 | -0.688789 |
| 8 | -7.226253 | -2.844711 | -1.189012 |
| 8 | -6.117911 | -1.275934 | -0.007287 |
| 1 | -6.965837 | -0.791100 | -0.090352 |
| 6 | -1.468629 | -5.201263 | 0.260243  |
| 1 | -2.446765 | -5.604371 | 0.540496  |
| 1 | -1.196282 | -5.647808 | -0.705574 |
| 1 | -0.740077 | -5.565689 | 0.995751  |
| 6 | -2.600183 | 4.677906  | 0.450575  |
| 1 | -2.477364 | 5.211640  | -0.501255 |
| 1 | -3.629773 | 4.839051  | 0.783854  |
| 1 | -1.938090 | 5.165419  | 1.177025  |
| 6 | 3.641274  | -4.557692 | -1.243787 |
| 1 | 3.212633  | -5.058061 | -0.369519 |
| 1 | 3.308762  | -5.110373 | -2.134304 |
| 1 | 4.729765  | -4.663778 | -1.188706 |
| 6 | 4.733239  | 3.274181  | -2.326703 |
| 1 | 5.576252  | 2.941240  | -1.705933 |
| 1 | 4.845780  | 2.791706  | -3.305843 |
| 1 | 4.848742  | 4.352142  | -2.472674 |
| 6 | 5.304788  | -2.026836 | -2.393610 |
| 6 | 5.894999  | -3.018368 | -3.081414 |
| 1 | 5.865723  | -1.099326 | -2.279746 |
| 1 | 6.897585  | -2.896557 | -3.481456 |
| 1 | 5.402436  | -3.963033 | -3.288174 |
| 6 | 2.598600  | 5.264878  | -1.080948 |
| 6 | 2.166036  | 6.049754  | -0.082106 |
| 1 | 3.119953  | 5.741606  | -1.912106 |
| 1 | 2.304371  | 7.126783  | -0.118118 |
| 1 | 1.696248  | 5.644453  | 0.809242  |
| 6 | -0.155047 | -2.449198 | 3.781901  |
| 1 | -0.330340 | -1.815651 | 4.657005  |
| 1 | -1.127957 | -2.688716 | 3.341228  |
| 6 | 0.627538  | -3.700401 | 4.134807  |
| 1 | 1.594313  | -3.445823 | 4.580394  |
| 1 | 0.062421  | -4.300650 | 4.856958  |
| 1 | 0.809814  | -4.309706 | 3.243640  |
| 7 | -0.131273 | 0.028401  | -2.467092 |
| 6 | -0.240739 | -1.050535 | -3.216975 |
| 6 | -0.490412 | 1.094700  | -3.263837 |
| 7 | -0.657554 | -0.724731 | -4.469106 |
| 1 | -0.029329 | -2.059543 | -2.897046 |
| 6 | -0.821807 | 0.647633  | -4.515096 |

|    |           |           |           |
|----|-----------|-----------|-----------|
| 1  | -0.484075 | 2.102688  | -2.878969 |
| 1  | -0.811144 | -1.371373 | -5.228569 |
| 1  | -1.147902 | 1.159055  | -5.407430 |
| 26 | 0.531360  | 0.060234  | -0.352565 |

-----  
<sup>10</sup>SS<sup>TS(C-D)</sup>Fe(his)  
 -----

Number of imaginary frequencies: 1    Electronic energy:    HF=-2836.5129554  
 Zero-point correction=                    0.878137 (Hartree/Particle)  
 Thermal correction to Energy=            0.937272  
 Thermal correction to Enthalpy=         0.938216  
 Thermal correction to Gibbs Free Energy= 0.781514  
 Sum of electronic and zero-point Energies= -2835.634818  
 Sum of electronic and thermal Energies= -2835.575684  
 Sum of electronic and thermal Enthalpies= -2835.574740  
 Sum of electronic and thermal Free Energies= -2835.731442

.....  
 Cartesian Coordinates  
 .....

|   |           |           |           |
|---|-----------|-----------|-----------|
| 6 | 3.499470  | -3.311954 | -0.973347 |
| 6 | 2.213434  | -2.758579 | -0.605657 |
| 7 | 2.227494  | -1.385863 | -0.689714 |
| 6 | 3.483671  | -1.048276 | -1.117369 |
| 6 | 4.301859  | -2.241519 | -1.304881 |
| 6 | 1.112719  | -3.524930 | -0.245498 |
| 6 | -0.142148 | -3.037562 | 0.097778  |
| 7 | -0.489211 | -1.713973 | 0.152508  |
| 6 | -1.812765 | -1.682176 | 0.505925  |
| 6 | -2.321792 | -3.032604 | 0.694737  |
| 6 | -1.273886 | -3.878665 | 0.437794  |
| 6 | -2.579381 | -0.525063 | 0.597171  |
| 6 | -2.151319 | 0.763594  | 0.290977  |
| 7 | -0.872376 | 1.109763  | -0.060972 |
| 6 | -0.892580 | 2.457300  | -0.305200 |
| 6 | -2.225638 | 2.991286  | -0.112193 |
| 6 | -3.014920 | 1.933716  | 0.257388  |
| 6 | 0.200250  | 3.232914  | -0.675686 |
| 6 | 1.490246  | 2.768174  | -0.884612 |
| 7 | 1.855896  | 1.449403  | -0.839961 |
| 6 | 3.165333  | 1.404784  | -1.240514 |
| 6 | 3.660331  | 2.735065  | -1.534168 |
| 6 | 2.622732  | 3.600287  | -1.283599 |
| 6 | 3.922492  | 0.245882  | -1.375954 |
| 1 | 0.029004  | 4.291680  | -0.824362 |
| 1 | 4.938460  | 0.364623  | -1.734763 |
| 1 | 1.238219  | -4.601993 | -0.246099 |
| 1 | -3.616027 | -0.642792 | 0.890173  |
| 6 | -4.503078 | 1.946356  | 0.457918  |
| 1 | -4.822000 | 1.131650  | 1.116958  |
| 1 | -4.811141 | 2.878995  | 0.945137  |

|   |           |           |           |
|---|-----------|-----------|-----------|
| 6 | -5.252235 | 1.830079  | -0.903660 |
| 1 | -5.002224 | 0.877719  | -1.382165 |
| 1 | -4.940441 | 2.648411  | -1.556950 |
| 6 | -6.743444 | 1.942654  | -0.720980 |
| 8 | -7.413509 | 2.945021  | -0.781257 |
| 8 | -7.313605 | 0.729431  | -0.412484 |
| 1 | -8.264479 | 0.892882  | -0.263127 |
| 6 | -3.728883 | -3.426697 | 1.043494  |
| 1 | -4.182874 | -2.714038 | 1.740652  |
| 1 | -3.706536 | -4.387541 | 1.569286  |
| 6 | -4.670256 | -3.597945 | -0.188253 |
| 1 | -4.142698 | -4.103969 | -0.999918 |
| 1 | -5.531516 | -4.206091 | 0.110209  |
| 6 | -5.196583 | -2.277670 | -0.705304 |
| 8 | -4.832460 | -1.707962 | -1.718188 |
| 8 | -6.128979 | -1.778047 | 0.130082  |
| 1 | -6.456611 | -0.917437 | -0.214846 |
| 6 | -1.250272 | -5.378685 | 0.465259  |
| 1 | -2.179957 | -5.788562 | 0.871977  |
| 1 | -1.118779 | -5.804141 | -0.538737 |
| 1 | -0.427473 | -5.759666 | 1.083118  |
| 6 | -2.615001 | 4.427353  | -0.301876 |
| 1 | -2.499662 | 4.748414  | -1.345444 |
| 1 | -3.657769 | 4.601723  | -0.019027 |
| 1 | -1.993077 | 5.094550  | 0.307939  |
| 6 | 3.859054  | -4.766487 | -0.943842 |
| 1 | 3.316142  | -5.300425 | -0.156706 |
| 1 | 3.632180  | -5.270603 | -1.893894 |
| 1 | 4.930664  | -4.895079 | -0.758859 |
| 6 | 5.059703  | 3.060651  | -1.960972 |
| 1 | 5.783761  | 2.835785  | -1.166595 |
| 1 | 5.361213  | 2.484568  | -2.845097 |
| 1 | 5.165446  | 4.121935  | -2.203792 |
| 6 | 5.698709  | -2.223089 | -1.726457 |
| 6 | 6.354957  | -3.185119 | -2.395192 |
| 1 | 6.259041  | -1.325434 | -1.464972 |
| 1 | 7.407134  | -3.072771 | -2.640817 |
| 1 | 5.871275  | -4.094334 | -2.737834 |
| 6 | 2.660696  | 5.058435  | -1.393233 |
| 6 | 2.059878  | 5.938354  | -0.577862 |
| 1 | 3.273170  | 5.453008  | -2.205016 |
| 1 | 2.157709  | 7.007822  | -0.743062 |
| 1 | 1.488171  | 5.625241  | 0.290760  |
| 6 | 1.234999  | 0.130780  | 1.640945  |
| 6 | 1.289575  | 1.500408  | 2.254008  |
| 6 | 0.670252  | -0.884820 | 2.587449  |
| 6 | 0.157692  | 2.179377  | 2.735497  |
| 6 | 2.528385  | 2.163050  | 2.394839  |
| 8 | -0.359716 | -0.761302 | 3.225463  |
| 8 | 1.463768  | -1.986980 | 2.682532  |

|    |           |           |           |
|----|-----------|-----------|-----------|
| 6  | 0.250313  | 3.457936  | 3.286684  |
| 1  | -0.801523 | 1.680838  | 2.678645  |
| 6  | 2.634607  | 3.444950  | 2.928986  |
| 8  | 3.704338  | 1.563849  | 1.965819  |
| 6  | 1.486814  | 4.101494  | 3.371129  |
| 1  | -0.647532 | 3.948756  | 3.652996  |
| 1  | 3.617528  | 3.899928  | 3.002268  |
| 6  | 3.735693  | 0.198441  | 2.107153  |
| 1  | 1.564522  | 5.098159  | 3.797517  |
| 1  | 3.644119  | -0.174128 | 3.130244  |
| 1  | 4.497807  | -0.254474 | 1.480717  |
| 1  | 2.431496  | -0.166923 | 1.543174  |
| 7  | 0.046383  | -0.353177 | -2.347787 |
| 6  | -1.145976 | -0.757464 | -2.749630 |
| 6  | 0.775126  | -0.093613 | -3.489978 |
| 7  | -1.213191 | -0.767294 | -4.105636 |
| 1  | -1.973801 | -1.040493 | -2.117121 |
| 6  | 0.008364  | -0.346224 | -4.596079 |
| 1  | 1.795210  | 0.252647  | -3.433167 |
| 1  | -2.022082 | -1.033987 | -4.647464 |
| 1  | 0.211308  | -0.269726 | -5.652961 |
| 6  | 0.991498  | -3.048802 | 3.537081  |
| 1  | -0.094507 | -3.122615 | 3.443046  |
| 1  | 1.452122  | -3.952037 | 3.127562  |
| 6  | 1.403082  | -2.824151 | 4.985836  |
| 1  | 0.924568  | -1.924679 | 5.382996  |
| 1  | 1.096836  | -3.678883 | 5.601023  |
| 1  | 2.489922  | -2.714101 | 5.069790  |
| 26 | 0.707744  | -0.118995 | -0.259019 |

---

**IOSSD<sub>Fe(his)</sub>**

---

Number of imaginary frequencies: 0    Electronic energy:    HF=-2836.531508  
Zero-point correction=                    0.881503 (Hartree/Particle)  
Thermal correction to Energy=            0.941880  
Thermal correction to Enthalpy=         0.942824  
Thermal correction to Gibbs Free Energy= 0.782612  
Sum of electronic and zero-point Energies= -2835.650005  
Sum of electronic and thermal Energies= -2835.589628  
Sum of electronic and thermal Enthalpies= -2835.588684  
Sum of electronic and thermal Free Energies= -2835.748896

.....  
Cartesian Coordinates

.....  

|   |          |           |           |
|---|----------|-----------|-----------|
| 6 | 3.410286 | -3.461844 | -0.871298 |
| 6 | 2.127400 | -2.871265 | -0.553583 |
| 7 | 2.177513 | -1.503135 | -0.653816 |
| 6 | 3.454108 | -1.200503 | -1.040418 |
| 6 | 4.250046 | -2.414609 | -1.181117 |
| 6 | 0.998116 | -3.600846 | -0.205859 |



|   |           |           |           |
|---|-----------|-----------|-----------|
| 6 | -0.238381 | -3.067410 | 0.129371  |
| 7 | -0.547049 | -1.730588 | 0.164384  |
| 6 | -1.863496 | -1.654658 | 0.539461  |
| 6 | -2.406381 | -2.985566 | 0.759004  |
| 6 | -1.388911 | -3.866956 | 0.497723  |
| 6 | -2.599201 | -0.477865 | 0.622341  |
| 6 | -2.141769 | 0.791879  | 0.283638  |
| 7 | -0.860092 | 1.093656  | -0.095568 |
| 6 | -0.849909 | 2.436565  | -0.373699 |
| 6 | -2.163542 | 3.010325  | -0.172081 |
| 6 | -2.973755 | 1.983156  | 0.236267  |
| 6 | 0.254280  | 3.170602  | -0.785751 |
| 6 | 1.529030  | 2.663014  | -0.989886 |
| 7 | 1.861299  | 1.336955  | -0.901698 |
| 6 | 3.179958  | 1.249477  | -1.267366 |
| 6 | 3.707076  | 2.556546  | -1.599317 |
| 6 | 2.683753  | 3.453000  | -1.400215 |
| 6 | 3.922676  | 0.075945  | -1.327366 |
| 1 | 0.110828  | 4.228877  | -0.963044 |
| 1 | 4.952348  | 0.164907  | -1.653746 |
| 1 | 1.089386  | -4.681019 | -0.189861 |
| 1 | -3.633293 | -0.563542 | 0.934097  |
| 6 | -4.457019 | 2.041303  | 0.463323  |
| 1 | -4.786067 | 1.247797  | 1.142796  |
| 1 | -4.729198 | 2.990840  | 0.939067  |
| 6 | -5.233852 | 1.922096  | -0.882233 |
| 1 | -5.020011 | 0.954352  | -1.347257 |
| 1 | -4.911299 | 2.719036  | -1.556389 |
| 6 | -6.717833 | 2.080519  | -0.675158 |
| 8 | -7.360848 | 3.099620  | -0.746778 |
| 8 | -7.315009 | 0.890898  | -0.328691 |
| 1 | -8.258241 | 1.083608  | -0.166232 |
| 6 | -3.816934 | -3.332775 | 1.141917  |
| 1 | -4.236888 | -2.593795 | 1.832731  |
| 1 | -3.810559 | -4.282808 | 1.687150  |
| 6 | -4.785342 | -3.502025 | -0.068776 |
| 1 | -4.287262 | -4.037914 | -0.879910 |
| 1 | -5.656771 | -4.080535 | 0.257571  |
| 6 | -5.285363 | -2.177853 | -0.602090 |
| 8 | -4.924394 | -1.637804 | -1.632106 |
| 8 | -6.188375 | -1.637392 | 0.240052  |
| 1 | -6.499829 | -0.775156 | -0.115618 |
| 6 | -1.408252 | -5.366213 | 0.553579  |
| 1 | -2.350784 | -5.741334 | 0.963828  |
| 1 | -1.284969 | -5.813843 | -0.441638 |
| 1 | -0.599284 | -5.757908 | 1.182761  |
| 6 | -2.516624 | 4.452136  | -0.386786 |
| 1 | -2.401153 | 4.750201  | -1.437082 |
| 1 | -3.552120 | 4.659140  | -0.099522 |
| 1 | -1.872534 | 5.113057  | 0.206506  |

|   |           |           |           |
|---|-----------|-----------|-----------|
| 6 | 3.731481  | -4.924315 | -0.811687 |
| 1 | 3.153877  | -5.432428 | -0.032167 |
| 1 | 3.517946  | -5.436724 | -1.760375 |
| 1 | 4.793828  | -5.076597 | -0.594593 |
| 6 | 5.122805  | 2.845140  | -1.997428 |
| 1 | 5.806135  | 2.738846  | -1.144088 |
| 1 | 5.474157  | 2.165260  | -2.782983 |
| 1 | 5.230791  | 3.868074  | -2.370101 |
| 6 | 5.662719  | -2.433281 | -1.546525 |
| 6 | 6.315864  | -3.412566 | -2.192285 |
| 1 | 6.236338  | -1.552814 | -1.257332 |
| 1 | 7.379869  | -3.331812 | -2.395778 |
| 1 | 5.818646  | -4.306209 | -2.556179 |
| 6 | 2.758192  | 4.905254  | -1.562275 |
| 6 | 2.179550  | 5.829691  | -0.781171 |
| 1 | 3.381982  | 5.253683  | -2.386603 |
| 1 | 2.304941  | 6.889364  | -0.985986 |
| 1 | 1.599997  | 5.563983  | 0.097987  |
| 6 | 1.377035  | 0.104480  | 1.700918  |
| 6 | 1.296461  | 1.496307  | 2.232286  |
| 6 | 0.765186  | -0.925666 | 2.589756  |
| 6 | 0.120444  | 2.054883  | 2.762895  |
| 6 | 2.454235  | 2.308212  | 2.275219  |
| 8 | -0.271987 | -0.835977 | 3.224646  |
| 8 | 1.555854  | -2.037829 | 2.649088  |
| 6 | 0.085091  | 3.350392  | 3.278577  |
| 1 | -0.770159 | 1.440714  | 2.781064  |
| 6 | 2.427270  | 3.614984  | 2.768013  |
| 8 | 3.624609  | 1.748264  | 1.798993  |
| 6 | 1.235819  | 4.139157  | 3.270351  |
| 1 | -0.844901 | 3.742556  | 3.681889  |
| 1 | 3.330133  | 4.215684  | 2.737665  |
| 6 | 4.826552  | 2.218371  | 2.229689  |
| 1 | 1.215262  | 5.155359  | 3.656027  |
| 1 | 5.655113  | 1.680953  | 1.783879  |
| 1 | 4.888560  | 2.580264  | 3.253676  |
| 1 | 2.405369  | -0.172075 | 1.490098  |
| 7 | 0.012221  | -0.469588 | -2.413731 |
| 6 | -1.197670 | -0.831589 | -2.801441 |
| 6 | 0.751524  | -0.283531 | -3.562704 |
| 7 | -1.266413 | -0.885503 | -4.156843 |
| 1 | -2.036030 | -1.056175 | -2.158609 |
| 6 | -0.027003 | -0.538567 | -4.660382 |
| 1 | 1.786789  | 0.017559  | -3.516259 |
| 1 | -2.086275 | -1.133726 | -4.691076 |
| 1 | 0.177863  | -0.507835 | -5.719261 |
| 6 | 1.080888  | -3.119714 | 3.470726  |
| 1 | -0.006415 | -3.186505 | 3.381572  |
| 1 | 1.535197  | -4.014568 | 3.035400  |
| 6 | 1.499139  | -2.940096 | 4.924431  |

|    |          |           |           |
|----|----------|-----------|-----------|
| 1  | 1.024625 | -2.051016 | 5.348863  |
| 1  | 1.193482 | -3.811762 | 5.516100  |
| 1  | 2.586268 | -2.832987 | 5.005312  |
| 26 | 0.675719 | -0.184084 | -0.289946 |

---

**1CSS<sub>E</sub>Fe**

---

Number of imaginary frequencies: 0    Electronic energy:    HF=-651.9553325  
Zero-point correction=                    0.207676 (Hartree/Particle)  
Thermal correction to Energy=            0.221445  
Thermal correction to Enthalpy=         0.222389  
Thermal correction to Gibbs Free Energy= 0.166289  
Sum of electronic and zero-point Energies= -651.747657  
Sum of electronic and thermal Energies= -651.733888  
Sum of electronic and thermal Enthalpies= -651.732943  
Sum of electronic and thermal Free Energies= -651.789043

---

Cartesian Coordinates

---

|   |           |           |           |
|---|-----------|-----------|-----------|
| 6 | -3.528469 | -1.325185 | 0.000119  |
| 6 | -2.387087 | -2.183676 | 0.000062  |
| 6 | -1.117480 | -1.680153 | -0.000027 |
| 6 | -0.859341 | -0.253335 | -0.000055 |
| 6 | -2.050342 | 0.574638  | -0.000006 |
| 6 | -3.357671 | 0.036552  | 0.000088  |
| 6 | 0.415431  | 0.293045  | -0.000082 |
| 8 | -1.833043 | 1.903262  | -0.000026 |
| 6 | -2.669390 | 2.901262  | -0.000071 |
| 6 | 1.659966  | -0.455194 | -0.000087 |
| 8 | 2.722865  | 0.408345  | 0.000062  |
| 8 | 1.820905  | -1.671314 | -0.000194 |
| 1 | -0.252739 | -2.331048 | -0.000084 |
| 1 | -2.536151 | -3.260094 | 0.000090  |
| 1 | -4.221318 | 0.693095  | 0.000117  |
| 1 | -4.528337 | -1.748525 | 0.000179  |
| 1 | -3.739762 | 2.743925  | -0.000005 |
| 1 | 0.526567  | 1.370425  | -0.000054 |
| 1 | -2.205518 | 3.876203  | -0.000082 |
| 6 | 4.021362  | -0.205723 | 0.000050  |
| 6 | 5.053516  | 0.908655  | 0.000117  |
| 1 | 4.117227  | -0.849372 | -0.881659 |
| 1 | 4.117205  | -0.849459 | 0.881698  |
| 1 | 6.063883  | 0.484435  | 0.000122  |
| 1 | 4.945098  | 1.541413  | -0.887068 |
| 1 | 4.945060  | 1.541338  | 0.887352  |

---

**1CSS<sub>TS</sub>(E-P)**

---

Number of imaginary frequencies: 1    Electronic energy:    HF=-651.9391778  
 Zero-point correction=                    0.207457 (Hartree/Particle)  
 Thermal correction to Energy=            0.220196  
 Thermal correction to Enthalpy=         0.221140  
 Thermal correction to Gibbs Free Energy= 0.167651  
 Sum of electronic and zero-point Energies= -651.731721  
 Sum of electronic and thermal Energies= -651.718982  
 Sum of electronic and thermal Enthalpies= -651.718037  
 Sum of electronic and thermal Free Energies= -651.771526

.....  
 Cartesian Coordinates

.....

|   |           |           |           |
|---|-----------|-----------|-----------|
| 6 | 0.331932  | 0.402218  | -0.422274 |
| 6 | -0.930294 | -0.230365 | -0.292904 |
| 6 | 1.600963  | -0.283052 | -0.297738 |
| 6 | -1.174110 | -1.620969 | -0.090404 |
| 6 | -2.088495 | 0.589893  | -0.236565 |
| 8 | 1.788626  | -1.468523 | -0.039416 |
| 8 | 2.636270  | 0.592627  | -0.507543 |
| 6 | -2.449782 | -2.085435 | 0.190801  |
| 1 | -0.332291 | -2.297850 | -0.157569 |
| 6 | -3.352733 | 0.154488  | 0.120688  |
| 8 | -1.841089 | 1.963649  | -0.445509 |
| 6 | -3.547555 | -1.215355 | 0.305601  |
| 1 | -2.602541 | -3.153110 | 0.325736  |
| 1 | -4.171304 | 0.865501  | 0.186763  |
| 6 | -1.573836 | 2.628344  | 0.649540  |
| 1 | -4.541713 | -1.599956 | 0.509751  |
| 1 | -1.595259 | 2.121709  | 1.607903  |
| 1 | -1.505285 | 3.704826  | 0.541555  |
| 1 | 0.384563  | 1.442116  | -0.707273 |
| 6 | 3.962257  | 0.044677  | -0.408140 |
| 1 | 3.967775  | -0.961616 | -0.835608 |
| 1 | 4.579651  | 0.703174  | -1.026189 |
| 6 | 4.454748  | 0.021362  | 1.033777  |
| 1 | 3.842025  | -0.657170 | 1.633808  |
| 1 | 5.493853  | -0.327259 | 1.070899  |
| 1 | 4.411503  | 1.022774  | 1.475689  |

-----  
**P**

Number of imaginary frequencies: 0    Electronic energy:    HF=-652.0616192  
 Zero-point correction=                    0.212779 (Hartree/Particle)  
 Thermal correction to Energy=            0.225119  
 Thermal correction to Enthalpy=         0.226063  
 Thermal correction to Gibbs Free Energy= 0.172469  
 Sum of electronic and zero-point Energies= -651.848841  
 Sum of electronic and thermal Energies= -651.836500  
 Sum of electronic and thermal Enthalpies= -651.835556

Sum of electronic and thermal Free Energies= -651.889150

.....  
Cartesian Coordinates

.....  
6 -0.209046 0.398183 0.615283  
6 1.135619 -0.216018 0.277875  
6 1.590284 -1.529259 0.264452  
6 2.015515 0.834789 0.005646  
6 2.938650 -1.769338 -0.033218  
1 0.905900 -2.346468 0.464826  
6 3.357965 0.620081 -0.285049  
6 3.806950 -0.705762 -0.298654  
1 3.310714 -2.789473 -0.057016  
1 4.020330 1.453088 -0.496463  
1 4.850395 -0.907995 -0.525825  
6 -1.422796 -0.315479 0.039424  
8 -1.516291 -1.515785 -0.099548  
8 -2.410391 0.560504 -0.247461  
8 1.425709 2.068656 0.066943  
6 -0.002402 1.858454 0.131704  
1 -0.421663 2.002179 -0.870449  
1 -0.358908 0.383393 1.707255  
1 -0.423075 2.608987 0.802606  
6 -3.649774 0.003915 -0.756991  
1 -4.094441 0.821619 -1.329024  
1 -3.409984 -0.823021 -1.429455  
6 -4.559462 -0.448652 0.375036  
1 -5.515792 -0.793994 -0.034254  
1 -4.104563 -1.275777 0.927105  
1 -4.760138 0.374975 1.068175

-----  
<sup>3</sup>A<sub>Fe(his)</sub>

-----  
Number of imaginary frequencies: 0    Electronic energy:    HF=-2184.5622635  
Zero-point correction=                    0.669628 (Hartree/Particle)  
Thermal correction to Energy=            0.716265  
Thermal correction to Enthalpy=         0.717209  
Thermal correction to Gibbs Free Energy= 0.581510  
Sum of electronic and zero-point Energies= -2183.892636  
Sum of electronic and thermal Energies= -2183.845999  
Sum of electronic and thermal Enthalpies= -2183.845054  
Sum of electronic and thermal Free Energies= -2183.980754

.....  
Cartesian Coordinates

.....  
6 -1.666460 -3.419655 -0.685534  
6 -0.362761 -2.780745 -0.650462  
7 -0.489212 -1.423129 -0.472202  
6 -1.836094 -1.180493 -0.402081  
6 -2.589423 -2.419589 -0.530109

|   |           |           |           |
|---|-----------|-----------|-----------|
| 6 | 0.842658  | -3.456464 | -0.782063 |
| 6 | 2.107392  | -2.872922 | -0.777673 |
| 7 | 2.356052  | -1.532044 | -0.605129 |
| 6 | 3.717818  | -1.387174 | -0.673991 |
| 6 | 4.355094  | -2.676516 | -0.924735 |
| 6 | 3.339444  | -3.606084 | -0.959328 |
| 6 | 4.399341  | -0.193443 | -0.467503 |
| 6 | 3.825620  | 1.059151  | -0.274637 |
| 7 | 2.475036  | 1.311420  | -0.239883 |
| 6 | 2.349948  | 2.666799  | -0.089873 |
| 6 | 3.659077  | 3.301432  | -0.011377 |
| 6 | 4.583838  | 2.285207  | -0.128624 |
| 6 | 1.138149  | 3.345858  | -0.000859 |
| 6 | -0.121870 | 2.765571  | -0.055289 |
| 7 | -0.366224 | 1.417867  | -0.169219 |
| 6 | -1.730251 | 1.284884  | -0.168517 |
| 6 | -2.373821 | 2.585873  | -0.055750 |
| 6 | -1.366633 | 3.510901  | 0.016312  |
| 6 | -1.469684 | 5.002708  | 0.133700  |
| 6 | -3.857209 | 2.824946  | -0.062591 |
| 6 | -4.450016 | 2.844836  | -1.482464 |
| 6 | -5.947713 | 3.061235  | -1.485884 |
| 8 | -6.652901 | 3.187315  | -0.508283 |
| 6 | -2.413307 | 0.076898  | -0.257479 |
| 6 | 6.077709  | 2.394128  | -0.165221 |
| 6 | 3.870409  | 4.739321  | 0.118862  |
| 6 | 4.916195  | 5.354829  | 0.693809  |
| 6 | 3.438655  | -5.082036 | -1.206084 |
| 6 | 5.778286  | -2.953725 | -1.114690 |
| 6 | 6.680695  | -2.183676 | -1.741816 |
| 6 | -4.086324 | -2.536880 | -0.469585 |
| 6 | -4.624154 | -2.545208 | 0.972094  |
| 6 | -6.132522 | -2.651710 | 1.032759  |
| 8 | -6.882061 | -2.723194 | 0.083503  |
| 6 | -1.897801 | -4.890321 | -0.869994 |
| 8 | -6.442043 | 3.100020  | -2.748831 |
| 8 | -6.579410 | -2.660063 | 2.314489  |
| 1 | 1.178140  | 4.422091  | 0.124163  |
| 1 | -3.496866 | 0.121154  | -0.230554 |
| 1 | 0.795619  | -4.531840 | -0.918821 |
| 1 | 5.480290  | -0.248402 | -0.460227 |
| 1 | 6.524273  | 1.627398  | -0.806959 |
| 1 | 6.384148  | 3.373748  | -0.546794 |
| 1 | 6.525327  | 2.280360  | 0.832088  |
| 1 | 4.479486  | -5.418387 | -1.206233 |
| 1 | 2.902887  | -5.659557 | -0.442027 |
| 1 | 3.009357  | -5.360120 | -2.177978 |
| 1 | -1.417169 | -5.264064 | -1.783013 |
| 1 | -1.494286 | -5.476694 | -0.033458 |
| 1 | -2.964826 | -5.120707 | -0.944696 |

|    |           |           |           |
|----|-----------|-----------|-----------|
| 1  | -2.507557 | 5.321717  | 0.269453  |
| 1  | -0.895597 | 5.383373  | 0.988036  |
| 1  | -1.085300 | 5.509437  | -0.761512 |
| 1  | 3.087000  | 5.370576  | -0.300759 |
| 1  | 4.980453  | 6.439010  | 0.715510  |
| 1  | 5.722542  | 4.811290  | 1.176036  |
| 1  | 6.119575  | -3.915049 | -0.728478 |
| 1  | 7.716645  | -2.498664 | -1.829672 |
| 1  | 6.416225  | -1.240413 | -2.210020 |
| 1  | -4.376874 | 2.059814  | 0.525314  |
| 1  | -4.089868 | 3.776066  | 0.427723  |
| 1  | -3.987178 | 3.632233  | -2.090476 |
| 1  | -4.238353 | 1.907451  | -2.012129 |
| 1  | -7.404639 | 3.233071  | -2.656825 |
| 1  | -4.415992 | -3.452294 | -0.971789 |
| 1  | -4.562432 | -1.716370 | -1.018408 |
| 1  | -4.199049 | -3.379937 | 1.543881  |
| 1  | -4.322353 | -1.639090 | 1.512187  |
| 1  | -7.551924 | -2.723006 | 2.258951  |
| 7  | 1.091736  | -0.343743 | 2.086029  |
| 6  | 1.116532  | -1.501846 | 2.714073  |
| 6  | 1.146537  | 0.626088  | 3.063955  |
| 7  | 1.184690  | -1.321497 | 4.061279  |
| 1  | 1.088340  | -2.472417 | 2.240159  |
| 6  | 1.204978  | 0.040371  | 4.301233  |
| 1  | 1.141210  | 1.674940  | 2.806345  |
| 1  | 1.217857  | -2.050853 | 4.758321  |
| 1  | 1.257536  | 0.447161  | 5.299362  |
| 26 | 0.997544  | -0.069734 | -0.246744 |

---

**<sup>3</sup>B<sub>Fe(his)</sub>**

---

Number of imaginary frequencies: 0    Electronic energy:    HF=-2946.0801418  
Zero-point correction=                    0.892028 (Hartree/Particle)  
Thermal correction to Energy=            0.955730  
Thermal correction to Enthalpy=         0.956674  
Thermal correction to Gibbs Free Energy= 0.781132  
Sum of electronic and zero-point Energies= -2945.188114  
Sum of electronic and thermal Energies= -2945.124412  
Sum of electronic and thermal Enthalpies= -2945.123468  
Sum of electronic and thermal Free Energies= -2945.299010

.....  
Cartesian Coordinates

.....

|   |          |           |          |
|---|----------|-----------|----------|
| 6 | 2.586313 | 2.422149  | 1.824005 |
| 6 | 2.027070 | 1.135769  | 1.470235 |
| 7 | 0.742567 | 1.271659  | 1.002808 |
| 6 | 0.464287 | 2.616086  | 1.047970 |
| 6 | 1.619731 | 3.361294  | 1.538690 |
| 6 | 2.723382 | -0.062721 | 1.577069 |

|   |           |           |           |
|---|-----------|-----------|-----------|
| 6 | 2.271152  | -1.313344 | 1.174051  |
| 7 | 1.036413  | -1.567150 | 0.640440  |
| 6 | 1.020647  | -2.911400 | 0.350022  |
| 6 | 2.275509  | -3.535312 | 0.712684  |
| 6 | 3.061532  | -2.536957 | 1.248116  |
| 6 | -0.061880 | -3.589054 | -0.204893 |
| 6 | -1.286229 | -3.026196 | -0.539433 |
| 7 | -1.616769 | -1.702412 | -0.370267 |
| 6 | -2.908162 | -1.580944 | -0.815009 |
| 6 | -3.418609 | -2.867112 | -1.269940 |
| 6 | -2.402216 | -3.768899 | -1.101687 |
| 7 | -1.917032 | 1.118162  | 0.021730  |
| 6 | -3.171524 | 0.857243  | -0.465723 |
| 6 | -3.954035 | 2.080797  | -0.540118 |
| 6 | -3.147164 | 3.088657  | -0.077326 |
| 6 | -1.878312 | 2.470771  | 0.261176  |
| 6 | -3.635418 | -0.396220 | -0.851106 |
| 6 | -0.775619 | 3.168569  | 0.742466  |
| 8 | 6.714793  | -1.390726 | -1.025400 |
| 6 | 6.160410  | -0.179386 | -0.761605 |
| 8 | 6.408142  | 0.479849  | 0.236216  |
| 6 | 5.236437  | 0.231429  | -1.820453 |
| 7 | 5.026225  | -0.647379 | -2.780873 |
| 7 | 4.833879  | -1.401925 | -3.608078 |
| 6 | 4.576682  | 1.552463  | -1.887764 |
| 6 | 5.278147  | 2.707552  | -1.517112 |
| 6 | 4.675448  | 3.964177  | -1.562786 |
| 6 | 3.357579  | 4.079636  | -2.000418 |
| 6 | 2.637597  | 2.946033  | -2.381934 |
| 6 | 3.234813  | 1.682533  | -2.320053 |
| 8 | 2.603954  | 0.523432  | -2.659049 |
| 6 | 1.225831  | 0.568720  | -3.008870 |
| 1 | -0.893086 | 4.233424  | 0.899694  |
| 1 | -4.651336 | -0.455606 | -1.221876 |
| 1 | 0.056008  | -4.652324 | -0.382809 |
| 1 | 3.727060  | -0.001710 | 1.980394  |
| 1 | 6.301380  | 2.606944  | -1.173797 |
| 1 | 5.235967  | 4.844404  | -1.262329 |
| 1 | 1.609719  | 3.048055  | -2.709184 |
| 1 | 2.876272  | 5.052665  | -2.038988 |
| 1 | 0.928837  | -0.467446 | -3.176337 |
| 1 | 0.622919  | 0.991582  | -2.196804 |
| 1 | 1.067226  | 1.148550  | -3.927834 |
| 6 | 7.681742  | -1.888988 | -0.075071 |
| 1 | 7.605313  | -2.975889 | -0.155195 |
| 1 | 7.385586  | -1.580930 | 0.929770  |
| 6 | 9.081916  | -1.395487 | -0.409862 |
| 1 | 9.140503  | -0.307854 | -0.306427 |
| 1 | 9.810061  | -1.845146 | 0.275407  |
| 1 | 9.357935  | -1.668824 | -1.433618 |



|   |           |           |           |
|---|-----------|-----------|-----------|
| 6 | 3.978932  | 2.636157  | 2.336594  |
| 1 | 4.198061  | 3.699409  | 2.468121  |
| 1 | 4.132052  | 2.140755  | 3.304770  |
| 1 | 4.724459  | 2.227521  | 1.643689  |
| 6 | 2.626566  | -4.974948 | 0.488363  |
| 1 | 3.704662  | -5.089625 | 0.334038  |
| 1 | 2.352944  | -5.609372 | 1.343438  |
| 1 | 2.118066  | -5.382169 | -0.391973 |
| 6 | 1.759137  | 4.806859  | 1.702820  |
| 6 | 1.214818  | 5.779511  | 0.954319  |
| 1 | 2.415129  | 5.113660  | 2.518085  |
| 1 | 1.402243  | 6.825414  | 1.180560  |
| 1 | 0.597180  | 5.572966  | 0.085799  |
| 6 | 4.421745  | -2.601143 | 1.770259  |
| 6 | 5.029007  | -3.668935 | 2.314326  |
| 1 | 4.990502  | -1.673668 | 1.717691  |
| 1 | 6.054121  | -3.603624 | 2.668277  |
| 1 | 4.529425  | -4.622331 | 2.452935  |
| 6 | -3.454194 | 4.550970  | 0.056866  |
| 1 | -4.446712 | 4.791263  | -0.336771 |
| 1 | -3.431350 | 4.877881  | 1.104919  |
| 1 | -2.727378 | 5.169784  | -0.484592 |
| 6 | -5.370397 | 2.182920  | -1.033574 |
| 1 | -5.566433 | 3.199649  | -1.392512 |
| 1 | -5.527152 | 1.512528  | -1.886015 |
| 6 | -4.815383 | -3.096923 | -1.778762 |
| 1 | -4.848588 | -4.019674 | -2.367410 |
| 1 | -5.090881 | -2.290340 | -2.464407 |
| 6 | -5.878887 | -3.186503 | -0.642135 |
| 1 | -5.436858 | -2.812568 | 0.291127  |
| 1 | -6.181534 | -4.219034 | -0.451922 |
| 6 | -6.421104 | 1.834400  | 0.061701  |
| 1 | -6.271387 | 0.805268  | 0.394693  |
| 1 | -6.299875 | 2.508469  | 0.913932  |
| 6 | -7.146765 | -2.372099 | -0.838313 |
| 8 | -8.255548 | -2.725272 | -0.501178 |
| 8 | -6.884090 | -1.156104 | -1.368568 |
| 1 | -7.683414 | -0.576982 | -1.323343 |
| 6 | -7.823319 | 1.957817  | -0.482297 |
| 8 | -8.451984 | 1.087088  | -1.063761 |
| 8 | -8.339338 | 3.191132  | -0.309629 |
| 1 | -9.222664 | 3.184111  | -0.727065 |
| 6 | -2.386941 | -5.236287 | -1.412187 |
| 1 | -2.249027 | -5.843243 | -0.507476 |
| 1 | -3.324202 | -5.555171 | -1.878144 |
| 1 | -1.572403 | -5.497286 | -2.099970 |
| 7 | -1.245781 | -0.604820 | 2.630378  |
| 6 | -1.413276 | 0.336297  | 3.537441  |
| 6 | -1.559042 | -1.796102 | 3.248730  |
| 7 | -1.824361 | -0.197866 | 4.719637  |

|    |           |           |          |
|----|-----------|-----------|----------|
| 1  | -1.248830 | 1.392768  | 3.381903 |
| 6  | -1.921958 | -1.566904 | 4.549966 |
| 1  | -1.497585 | -2.731957 | 2.713023 |
| 1  | -2.015073 | 0.313540  | 5.568808 |
| 1  | -2.229941 | -2.224293 | 5.348423 |
| 26 | -0.481436 | -0.242627 | 0.442354 |

-----  
<sup>3</sup>C<sub>Fe(his)</sub>  
 -----

Number of imaginary frequencies: 0    Electronic energy:    HF=-2946.0448528  
 Zero-point correction=                    0.887889 (Hartree/Particle)  
 Thermal correction to Energy=            0.952949  
 Thermal correction to Enthalpy=         0.953894  
 Thermal correction to Gibbs Free Energy= 0.777381  
 Sum of electronic and zero-point Energies= -2945.156964  
 Sum of electronic and thermal Energies= -2945.091903  
 Sum of electronic and thermal Enthalpies= -2945.090959  
 Sum of electronic and thermal Free Energies= -2945.267472

.....  
 Cartesian Coordinates  
 .....

|   |           |           |           |
|---|-----------|-----------|-----------|
| 6 | 3.300078  | -3.225152 | -1.099304 |
| 6 | 2.034987  | -2.647929 | -0.686652 |
| 7 | 2.031499  | -1.290326 | -0.876004 |
| 6 | 3.240470  | -0.980148 | -1.427092 |
| 6 | 4.054018  | -2.182882 | -1.594547 |
| 6 | 0.932162  | -3.388502 | -0.272009 |
| 6 | -0.339173 | -2.877221 | -0.043193 |
| 7 | -0.681592 | -1.547494 | -0.087629 |
| 6 | -2.033079 | -1.491142 | 0.141685  |
| 6 | -2.570930 | -2.828788 | 0.315068  |
| 6 | -1.509471 | -3.693005 | 0.217350  |
| 6 | -2.785134 | -0.326581 | 0.250127  |
| 6 | -2.287662 | 0.967641  | 0.175078  |
| 7 | -0.988767 | 1.293275  | -0.100310 |
| 6 | -0.928527 | 2.661472  | -0.089416 |
| 6 | -2.231070 | 3.229809  | 0.222916  |
| 6 | -3.082959 | 2.170562  | 0.384386  |
| 6 | 0.200581  | 3.411508  | -0.390244 |
| 6 | 1.426270  | 2.891308  | -0.792068 |
| 7 | 1.700593  | 1.555467  | -0.935006 |
| 6 | 2.945079  | 1.474979  | -1.511915 |
| 6 | 3.476657  | 2.796425  | -1.751012 |
| 6 | 2.551422  | 3.689098  | -1.254592 |
| 6 | 3.642479  | 0.301863  | -1.780306 |
| 1 | 0.106561  | 4.489988  | -0.369880 |
| 1 | 4.608863  | 0.409581  | -2.259770 |
| 1 | 1.055344  | -4.462600 | -0.188123 |
| 1 | -3.842793 | -0.440149 | 0.452356  |
| 6 | 1.002576  | 0.143380  | 1.526901  |

|   |           |           |           |
|---|-----------|-----------|-----------|
| 6 | 1.735160  | 1.275068  | 2.125014  |
| 6 | 1.057867  | 2.288718  | 2.830673  |
| 6 | 3.151692  | 1.367234  | 2.056767  |
| 6 | 1.729990  | 3.370379  | 3.402467  |
| 1 | -0.019514 | 2.207619  | 2.920330  |
| 6 | 3.826700  | 2.453597  | 2.623398  |
| 6 | 3.115273  | 3.456854  | 3.287616  |
| 1 | 1.171393  | 4.135080  | 3.936063  |
| 1 | 4.907002  | 2.520111  | 2.565126  |
| 1 | 3.655940  | 4.292708  | 3.724564  |
| 6 | 0.049462  | -0.499956 | 2.469054  |
| 8 | -0.979380 | -0.011423 | 2.908132  |
| 8 | 0.478582  | -1.729263 | 2.859661  |
| 8 | 3.791929  | 0.325504  | 1.450043  |
| 6 | 5.204731  | 0.339693  | 1.396614  |
| 1 | 5.492658  | -0.584667 | 0.892831  |
| 1 | 5.581472  | 1.196681  | 0.821048  |
| 1 | 5.647883  | 0.360080  | 2.401512  |
| 7 | 3.721444  | -3.217820 | 2.516052  |
| 7 | 3.824520  | -2.356457 | 3.200569  |
| 6 | -4.544505 | 2.203863  | 0.732868  |
| 1 | -4.776879 | 1.407115  | 1.449648  |
| 1 | -4.788986 | 3.148703  | 1.228665  |
| 6 | -5.479834 | 2.056358  | -0.498187 |
| 1 | -5.335043 | 1.088956  | -0.981908 |
| 1 | -5.243693 | 2.845112  | -1.221239 |
| 6 | -6.925327 | 2.241569  | -0.095372 |
| 8 | -7.405840 | 3.248976  | 0.368255  |
| 8 | -7.689275 | 1.117299  | -0.286737 |
| 1 | -8.589935 | 1.350466  | 0.011945  |
| 6 | -4.028732 | -3.136153 | 0.517166  |
| 1 | -4.453308 | -2.427399 | 1.234004  |
| 1 | -4.145326 | -4.128398 | 0.965353  |
| 6 | -4.851297 | -3.081203 | -0.806645 |
| 1 | -4.284022 | -2.509396 | -1.552587 |
| 1 | -5.014599 | -4.078054 | -1.222518 |
| 6 | -6.200822 | -2.396200 | -0.712375 |
| 8 | -7.232797 | -2.790939 | -1.207921 |
| 8 | -6.108269 | -1.217537 | -0.047690 |
| 1 | -6.951920 | -0.725931 | -0.134776 |
| 6 | -1.508979 | -5.189584 | 0.323417  |
| 1 | -2.498994 | -5.570502 | 0.591903  |
| 1 | -1.221128 | -5.666323 | -0.622960 |
| 1 | -0.803629 | -5.541930 | 1.086592  |
| 6 | -2.519011 | 4.697303  | 0.334857  |
| 1 | -2.386542 | 5.213092  | -0.625515 |
| 1 | -3.546026 | 4.880606  | 0.664537  |
| 1 | -1.849066 | 5.184815  | 1.053996  |
| 6 | 3.676008  | -4.669202 | -0.962522 |
| 1 | 3.198915  | -5.124615 | -0.088725 |

|    |           |           |           |
|----|-----------|-----------|-----------|
| 1  | 3.387703  | -5.263389 | -1.841639 |
| 1  | 4.759414  | -4.775233 | -0.844252 |
| 6  | 4.815923  | 3.096461  | -2.355665 |
| 1  | 5.638410  | 2.774228  | -1.702889 |
| 1  | 4.950569  | 2.587079  | -3.318033 |
| 1  | 4.943398  | 4.169273  | -2.526485 |
| 6  | 5.404716  | -2.191065 | -2.145294 |
| 6  | 6.027129  | -3.212446 | -2.756775 |
| 1  | 5.958847  | -1.257671 | -2.047024 |
| 1  | 7.048065  | -3.107923 | -3.112773 |
| 1  | 5.545222  | -4.167272 | -2.941040 |
| 6  | 2.684449  | 5.145490  | -1.209564 |
| 6  | 2.290307  | 5.946923  | -0.208718 |
| 1  | 3.187118  | 5.601886  | -2.063288 |
| 1  | 2.439892  | 7.021798  | -0.262265 |
| 1  | 1.843863  | 5.556103  | 0.701117  |
| 6  | -0.367906 | -2.411768 | 3.807043  |
| 1  | -0.523469 | -1.767839 | 4.678869  |
| 1  | -1.346105 | -2.586768 | 3.346889  |
| 6  | 0.317382  | -3.713795 | 4.182397  |
| 1  | 1.290067  | -3.524435 | 4.647394  |
| 1  | -0.302354 | -4.271936 | 4.893632  |
| 1  | 0.477975  | -4.338476 | 3.297365  |
| 7  | -0.061265 | -0.095265 | -2.561788 |
| 6  | 0.183818  | -1.096768 | -3.384016 |
| 6  | -0.739528 | 0.855183  | -3.295049 |
| 7  | -0.311419 | -0.832567 | -4.621289 |
| 1  | 0.704672  | -2.005956 | -3.125534 |
| 6  | -0.904844 | 0.416003  | -4.581424 |
| 1  | -1.054956 | 1.783311  | -2.844078 |
| 1  | -0.248107 | -1.439128 | -5.425675 |
| 1  | -1.372292 | 0.859179  | -5.447063 |
| 26 | 0.541584  | 0.012471  | -0.407740 |

-----  
<sup>3</sup>TS(C-D)<sub>Fe(his)</sub>  
 -----

Number of imaginary frequencies: 1    Electronic energy:    HF=-2836.5033584  
 Zero-point correction=                    0.877330 (Hartree/Particle)  
 Thermal correction to Energy=            0.936870  
 Thermal correction to Enthalpy=         0.937815  
 Thermal correction to Gibbs Free Energy= 0.778643  
 Sum of electronic and zero-point Energies= -2835.626029  
 Sum of electronic and thermal Energies= -2835.566488  
 Sum of electronic and thermal Enthalpies= -2835.565544  
 Sum of electronic and thermal Free Energies= -2835.724715

.....  
 Cartesian Coordinates  
 .....

|   |          |           |           |
|---|----------|-----------|-----------|
| 6 | 3.555051 | -3.276348 | -0.903234 |
| 6 | 2.261795 | -2.724414 | -0.550933 |

|   |           |           |           |
|---|-----------|-----------|-----------|
| 7 | 2.263683  | -1.357944 | -0.668588 |
| 6 | 3.514375  | -1.020201 | -1.106582 |
| 6 | 4.345944  | -2.207672 | -1.263593 |
| 6 | 1.164452  | -3.492896 | -0.184354 |
| 6 | -0.101295 | -3.016908 | 0.133171  |
| 7 | -0.480394 | -1.698968 | 0.157797  |
| 6 | -1.808389 | -1.690802 | 0.505310  |
| 6 | -2.288106 | -3.045253 | 0.709117  |
| 6 | -1.218929 | -3.873127 | 0.475887  |
| 6 | -2.597162 | -0.549319 | 0.587720  |
| 6 | -2.178396 | 0.740452  | 0.282276  |
| 7 | -0.898404 | 1.087004  | -0.067771 |
| 6 | -0.919829 | 2.434836  | -0.307663 |
| 6 | -2.254501 | 2.966549  | -0.113624 |
| 6 | -3.043314 | 1.907159  | 0.251183  |
| 6 | 0.167936  | 3.213529  | -0.683089 |
| 6 | 1.459481  | 2.757064  | -0.904176 |
| 7 | 1.841820  | 1.443181  | -0.868847 |
| 6 | 3.153862  | 1.417213  | -1.273478 |
| 6 | 3.626204  | 2.751586  | -1.569701 |
| 6 | 2.578206  | 3.602328  | -1.309265 |
| 6 | 3.931745  | 0.272589  | -1.398865 |
| 1 | -0.007678 | 4.271958  | -0.827686 |
| 1 | 4.944801  | 0.403327  | -1.761312 |
| 1 | 1.302061  | -4.568016 | -0.158291 |
| 1 | -3.632319 | -0.680827 | 0.879019  |
| 6 | -4.531349 | 1.912371  | 0.451999  |
| 1 | -4.843401 | 1.101598  | 1.119396  |
| 1 | -4.846243 | 2.847070  | 0.930287  |
| 6 | -5.280477 | 1.776906  | -0.907610 |
| 1 | -5.015073 | 0.827724  | -1.383798 |
| 1 | -4.983688 | 2.598377  | -1.564242 |
| 6 | -6.772962 | 1.865107  | -0.720239 |
| 8 | -7.453933 | 2.861452  | -0.745957 |
| 8 | -7.328234 | 0.635628  | -0.452133 |
| 1 | -8.280405 | 0.782980  | -0.294071 |
| 6 | -3.691310 | -3.462034 | 1.047394  |
| 1 | -4.162975 | -2.754620 | 1.738036  |
| 1 | -3.657553 | -4.420213 | 1.577026  |
| 6 | -4.617847 | -3.652530 | -0.192731 |
| 1 | -4.075045 | -4.154200 | -0.997061 |
| 1 | -5.472522 | -4.272419 | 0.100288  |
| 6 | -5.159447 | -2.342605 | -0.721270 |
| 8 | -4.794321 | -1.771848 | -1.733229 |
| 8 | -6.107269 | -1.853622 | 0.102742  |
| 1 | -6.445167 | -0.999721 | -0.249042 |
| 6 | -1.165063 | -5.371445 | 0.531945  |
| 1 | -2.096526 | -5.793258 | 0.921457  |
| 1 | -0.997734 | -5.811244 | -0.460269 |
| 1 | -0.351462 | -5.722714 | 1.178688  |

|   |           |           |           |
|---|-----------|-----------|-----------|
| 6 | -2.643154 | 4.403648  | -0.293255 |
| 1 | -2.509775 | 4.736935  | -1.330672 |
| 1 | -3.690823 | 4.573024  | -0.026317 |
| 1 | -2.032073 | 5.062675  | 0.336054  |
| 6 | 3.928434  | -4.725695 | -0.833415 |
| 1 | 3.396354  | -5.240688 | -0.026503 |
| 1 | 3.699497  | -5.259786 | -1.766442 |
| 1 | 5.002500  | -4.838112 | -0.652717 |
| 6 | 5.019467  | 3.099777  | -1.998798 |
| 1 | 5.743680  | 2.911395  | -1.195323 |
| 1 | 5.338563  | 2.511302  | -2.868182 |
| 1 | 5.100710  | 4.157455  | -2.265509 |
| 6 | 5.742667  | -2.183622 | -1.686082 |
| 6 | 6.406311  | -3.152649 | -2.336645 |
| 1 | 6.294556  | -1.276309 | -1.440591 |
| 1 | 7.457554  | -3.037011 | -2.584605 |
| 1 | 5.929645  | -4.072388 | -2.660814 |
| 6 | 2.597292  | 5.061437  | -1.413093 |
| 6 | 2.004936  | 5.928296  | -0.577999 |
| 1 | 3.187622  | 5.466824  | -2.235796 |
| 1 | 2.087584  | 6.999916  | -0.737554 |
| 1 | 1.458929  | 5.601972  | 0.302255  |
| 6 | 1.291640  | 0.153856  | 1.701764  |
| 6 | 1.232377  | 1.532978  | 2.273759  |
| 6 | 0.727889  | -0.886034 | 2.613245  |
| 6 | 0.059006  | 2.127812  | 2.773799  |
| 6 | 2.421412  | 2.299934  | 2.355911  |
| 8 | -0.314968 | -0.814364 | 3.241729  |
| 8 | 1.555428  | -1.965771 | 2.701733  |
| 6 | 0.050487  | 3.426660  | 3.280661  |
| 1 | -0.852918 | 1.544337  | 2.759413  |
| 6 | 2.418219  | 3.604307  | 2.854093  |
| 8 | 3.637943  | 1.810729  | 1.934815  |
| 6 | 1.230229  | 4.174947  | 3.307219  |
| 1 | -0.876918 | 3.851065  | 3.656533  |
| 1 | 3.359825  | 4.143686  | 2.891162  |
| 6 | 3.810731  | 0.426541  | 2.083090  |
| 1 | 1.233879  | 5.187995  | 3.701945  |
| 1 | 3.929785  | 0.116976  | 3.127981  |
| 1 | 4.598067  | 0.079651  | 1.417719  |
| 1 | 2.606125  | -0.043362 | 1.687811  |
| 7 | 0.061668  | -0.400721 | -2.397655 |
| 6 | -1.141922 | -0.776108 | -2.794616 |
| 6 | 0.810755  | -0.218065 | -3.541383 |
| 7 | -1.196762 | -0.841348 | -4.148983 |
| 1 | -1.983457 | -1.007401 | -2.158642 |
| 6 | 0.044885  | -0.487547 | -4.643913 |
| 1 | 1.842853  | 0.091825  | -3.487393 |
| 1 | -2.008726 | -1.104366 | -4.688338 |
| 1 | 0.258863  | -0.462241 | -5.701112 |

|    |          |           |           |
|----|----------|-----------|-----------|
| 6  | 1.119347 | -3.042900 | 3.553598  |
| 1  | 0.036396 | -3.155662 | 3.459280  |
| 1  | 1.612654 | -3.929843 | 3.145613  |
| 6  | 1.520488 | -2.805534 | 5.003569  |
| 1  | 1.008767 | -1.924486 | 5.400590  |
| 1  | 1.245298 | -3.671645 | 5.617690  |
| 1  | 2.602150 | -2.654343 | 5.087899  |
| 26 | 0.698164 | -0.114473 | -0.278298 |

-----  
<sup>3</sup>D<sub>Fe(his)</sub>  
-----

Number of imaginary frequencies: 0    Electronic energy:    HF=-2836.5318632  
Zero-point correction=                    0.881356 (Hartree/Particle)  
Thermal correction to Energy=            0.941786  
Thermal correction to Enthalpy=         0.942730  
Thermal correction to Gibbs Free Energy= 0.781270  
Sum of electronic and zero-point Energies= -2835.650507  
Sum of electronic and thermal Energies= -2835.590077  
Sum of electronic and thermal Enthalpies= -2835.589133  
Sum of electronic and thermal Free Energies= -2835.750593

-----  
Cartesian Coordinates  
-----

|   |           |           |           |
|---|-----------|-----------|-----------|
| 6 | 3.410104  | -3.467550 | -0.860494 |
| 6 | 2.127638  | -2.875158 | -0.544195 |
| 7 | 2.178833  | -1.507242 | -0.647657 |
| 6 | 3.455229  | -1.206727 | -1.036461 |
| 6 | 4.250338  | -2.421831 | -1.174029 |
| 6 | 0.997075  | -3.603180 | -0.197255 |
| 6 | -0.240342 | -3.068486 | 0.132899  |
| 7 | -0.547905 | -1.731392 | 0.165944  |
| 6 | -1.865666 | -1.653912 | 0.536123  |
| 6 | -2.410843 | -2.984224 | 0.753611  |
| 6 | -1.393136 | -3.866780 | 0.496959  |
| 6 | -2.599831 | -0.476044 | 0.618738  |
| 6 | -2.139557 | 0.793883  | 0.284537  |
| 7 | -0.856902 | 1.094143  | -0.092178 |
| 6 | -0.843848 | 2.437540  | -0.367106 |
| 6 | -2.156561 | 3.013670  | -0.164943 |
| 6 | -2.969254 | 1.987035  | 0.239556  |
| 6 | 0.261659  | 3.169630  | -0.779365 |
| 6 | 1.534866  | 2.659582  | -0.987470 |
| 7 | 1.865175  | 1.332886  | -0.899877 |
| 6 | 3.182680  | 1.243063  | -1.269317 |
| 6 | 3.710756  | 2.548966  | -1.604145 |
| 6 | 2.689613  | 3.447365  | -1.401972 |
| 6 | 3.924119  | 0.068574  | -1.328158 |
| 1 | 0.120047  | 4.228341  | -0.955540 |
| 1 | 4.953152  | 0.155740  | -1.657077 |
| 1 | 1.087512  | -4.683409 | -0.179414 |

|   |           |           |           |
|---|-----------|-----------|-----------|
| 1 | -3.634860 | -0.560812 | 0.927684  |
| 6 | -4.452676 | 2.047249  | 0.464899  |
| 1 | -4.783819 | 1.252824  | 1.142332  |
| 1 | -4.724117 | 2.996219  | 0.942158  |
| 6 | -5.228116 | 1.932024  | -0.881824 |
| 1 | -5.014562 | 0.965515  | -1.349426 |
| 1 | -4.904020 | 2.730615  | -1.553332 |
| 6 | -6.712028 | 2.091655  | -0.675194 |
| 8 | -7.351958 | 3.113504  | -0.734430 |
| 8 | -7.313077 | 0.899402  | -0.344943 |
| 1 | -8.255856 | 1.092860  | -0.180726 |
| 6 | -3.823405 | -3.329918 | 1.130433  |
| 1 | -4.245085 | -2.591313 | 1.820617  |
| 1 | -3.820614 | -4.280742 | 1.674310  |
| 6 | -4.787269 | -3.496039 | -0.084334 |
| 1 | -4.286521 | -4.030802 | -0.894568 |
| 1 | -5.660408 | -4.074476 | 0.237560  |
| 6 | -5.284348 | -2.170551 | -0.617152 |
| 8 | -4.919701 | -1.629207 | -1.645183 |
| 8 | -6.189707 | -1.630632 | 0.222842  |
| 1 | -6.499279 | -0.767632 | -0.132639 |
| 6 | -1.414247 | -5.366002 | 0.553088  |
| 1 | -2.358365 | -5.740071 | 0.960662  |
| 1 | -1.288522 | -5.813983 | -0.441667 |
| 1 | -0.607542 | -5.758450 | 1.184706  |
| 6 | -2.506356 | 4.456824  | -0.375954 |
| 1 | -2.387382 | 4.758078  | -1.424946 |
| 1 | -3.542265 | 4.664866  | -0.090907 |
| 1 | -1.862662 | 5.114631  | 0.221256  |
| 6 | 3.730254  | -4.930078 | -0.796701 |
| 1 | 3.152383  | -5.435465 | -0.015601 |
| 1 | 3.516200  | -5.445115 | -1.743853 |
| 1 | 4.792530  | -5.082532 | -0.579335 |
| 6 | 5.125548  | 2.835087  | -2.007495 |
| 1 | 5.811138  | 2.732887  | -1.155471 |
| 1 | 5.474463  | 2.151252  | -2.790659 |
| 1 | 5.232930  | 3.856129  | -2.385539 |
| 6 | 5.662714  | -2.442522 | -1.540416 |
| 6 | 6.315048  | -3.424498 | -2.182921 |
| 1 | 6.236921  | -1.561199 | -1.254995 |
| 1 | 7.378941  | -3.344910 | -2.387471 |
| 1 | 5.817251  | -4.319337 | -2.543054 |
| 6 | 2.766488  | 4.899274  | -1.565694 |
| 6 | 2.190953  | 5.826186  | -0.785199 |
| 1 | 3.389752  | 5.245368  | -2.391411 |
| 1 | 2.318264  | 6.885252  | -0.991949 |
| 1 | 1.611918  | 5.563214  | 0.095107  |
| 6 | 1.378602  | 0.103401  | 1.718950  |
| 6 | 1.301456  | 1.494608  | 2.242151  |
| 6 | 0.753832  | -0.924968 | 2.599510  |



|    |           |           |           |
|----|-----------|-----------|-----------|
| 6  | 0.127427  | 2.055130  | 2.778162  |
| 6  | 2.458734  | 2.309829  | 2.271616  |
| 8  | -0.287212 | -0.831266 | 3.227599  |
| 8  | 1.538724  | -2.040883 | 2.661821  |
| 6  | 0.093792  | 3.352443  | 3.287121  |
| 1  | -0.762077 | 1.439692  | 2.804353  |
| 6  | 2.431868  | 3.619732  | 2.757749  |
| 8  | 3.625480  | 1.749699  | 1.792778  |
| 6  | 1.243460  | 4.143940  | 3.265409  |
| 1  | -0.833974 | 3.745695  | 3.694408  |
| 1  | 3.332042  | 4.223668  | 2.714516  |
| 6  | 4.832021  | 2.233316  | 2.190769  |
| 1  | 1.222881  | 5.163003  | 3.643427  |
| 1  | 5.654703  | 1.686962  | 1.745375  |
| 1  | 4.910457  | 2.626844  | 3.201554  |
| 1  | 2.404040  | -0.180871 | 1.505509  |
| 7  | 0.010107  | -0.473167 | -2.419703 |
| 6  | -1.200715 | -0.832186 | -2.806991 |
| 6  | 0.748918  | -0.288345 | -3.569155 |
| 7  | -1.270661 | -0.885331 | -4.162524 |
| 1  | -2.039320 | -1.055349 | -2.163926 |
| 6  | -0.030797 | -0.540919 | -4.666650 |
| 1  | 1.784938  | 0.010432  | -3.523294 |
| 1  | -2.091450 | -1.131402 | -4.696326 |
| 1  | 0.173426  | -0.510085 | -5.725665 |
| 6  | 1.053623  | -3.121827 | 3.478835  |
| 1  | -0.033341 | -3.183657 | 3.382538  |
| 1  | 1.506734  | -4.017987 | 3.045019  |
| 6  | 1.463426  | -2.946155 | 4.935427  |
| 1  | 0.990165  | -2.055632 | 5.358244  |
| 1  | 1.150125  | -3.817333 | 5.523791  |
| 1  | 2.550481  | -2.844033 | 5.023404  |
| 26 | 0.677395  | -0.186551 | -0.287975 |

---

**<sup>3</sup>TS(D-E)<sub>Fe(his)</sub>**

---

Number of imaginary frequencies: 1    Electronic energy:    HF=-2836.5308683  
Zero-point correction=                    0.879809 (Hartree/Particle)  
Thermal correction to Energy=            0.939994  
Thermal correction to Enthalpy=         0.940938  
Thermal correction to Gibbs Free Energy= 0.780007  
Sum of electronic and zero-point Energies= -2835.651060  
Sum of electronic and thermal Energies= -2835.590874  
Sum of electronic and thermal Enthalpies= -2835.589930  
Sum of electronic and thermal Free Energies= -2835.750861

.....  
Cartesian Coordinates

|   |          |           |           |
|---|----------|-----------|-----------|
| 6 | 3.099777 | -3.750829 | -0.722060 |
| 6 | 1.878930 | -3.037584 | -0.411048 |

|   |           |           |           |
|---|-----------|-----------|-----------|
| 7 | 2.037829  | -1.685740 | -0.595747 |
| 6 | 3.319710  | -1.515753 | -1.041475 |
| 6 | 4.009556  | -2.798412 | -1.126616 |
| 6 | 0.696092  | -3.651081 | -0.017285 |
| 6 | -0.497736 | -3.003986 | 0.272338  |
| 7 | -0.692704 | -1.645395 | 0.245703  |
| 6 | -2.004742 | -1.443317 | 0.586891  |
| 6 | -2.666243 | -2.713875 | 0.835118  |
| 6 | -1.720178 | -3.688194 | 0.641843  |
| 6 | -2.628501 | -0.201219 | 0.642043  |
| 6 | -2.046991 | 1.019422  | 0.315728  |
| 7 | -0.745204 | 1.195902  | -0.070556 |
| 6 | -0.608242 | 2.531753  | -0.346071 |
| 6 | -1.858374 | 3.233198  | -0.122558 |
| 6 | -2.759695 | 2.287590  | 0.287909  |
| 6 | 0.551666  | 3.147969  | -0.797524 |
| 6 | 1.759697  | 2.512728  | -1.053924 |
| 7 | 1.964632  | 1.161318  | -0.954491 |
| 6 | 3.249805  | 0.938004  | -1.380100 |
| 6 | 3.882265  | 2.179981  | -1.771850 |
| 6 | 2.963690  | 3.177709  | -1.539805 |
| 6 | 3.879986  | -0.300879 | -1.419732 |
| 1 | 0.507419  | 4.213582  | -0.983267 |
| 1 | 4.897269  | -0.319749 | -1.793716 |
| 1 | 0.699195  | -4.733085 | 0.054447  |
| 1 | -3.672038 | -0.186501 | 0.935788  |
| 6 | -4.228355 | 2.461987  | 0.542345  |
| 1 | -4.563504 | 1.800725  | 1.350437  |
| 1 | -4.451339 | 3.481409  | 0.872088  |
| 6 | -5.053993 | 2.166358  | -0.733281 |
| 1 | -4.832671 | 1.171158  | -1.128402 |
| 1 | -4.773188 | 2.883935  | -1.515410 |
| 6 | -6.536288 | 2.324044  | -0.498013 |
| 8 | -7.080619 | 3.211650  | 0.113309  |
| 8 | -7.261918 | 1.309183  | -1.076540 |
| 1 | -8.200338 | 1.494796  | -0.875661 |
| 6 | -4.113407 | -2.927937 | 1.176627  |
| 1 | -4.518809 | -2.087214 | 1.750210  |
| 1 | -4.200562 | -3.804053 | 1.829300  |
| 6 | -5.028135 | -3.189990 | -0.060069 |
| 1 | -4.528480 | -3.873947 | -0.750389 |
| 1 | -5.963003 | -3.645978 | 0.281375  |
| 6 | -5.367773 | -1.919660 | -0.807430 |
| 8 | -4.780031 | -1.481273 | -1.779513 |
| 8 | -6.412308 | -1.287725 | -0.234125 |
| 1 | -6.602901 | -0.459098 | -0.727801 |
| 6 | -1.873299 | -5.176393 | 0.756630  |
| 1 | -2.843328 | -5.448547 | 1.184513  |
| 1 | -1.796841 | -5.672946 | -0.220064 |
| 1 | -1.099116 | -5.614777 | 1.398642  |

|   |           |           |           |
|---|-----------|-----------|-----------|
| 6 | -2.068265 | 4.704163  | -0.325932 |
| 1 | -1.936853 | 4.995186  | -1.376415 |
| 1 | -3.074440 | 5.010670  | -0.023438 |
| 1 | -1.354234 | 5.295053  | 0.261402  |
| 6 | 3.303263  | -5.228241 | -0.575167 |
| 1 | 2.710005  | -5.636459 | 0.250087  |
| 1 | 3.020378  | -5.780083 | -1.482781 |
| 1 | 4.355875  | -5.454381 | -0.375251 |
| 6 | 5.296134  | 2.320564  | -2.249439 |
| 1 | 6.010080  | 2.198065  | -1.423572 |
| 1 | 5.546722  | 1.572686  | -3.011139 |
| 1 | 5.474397  | 3.309085  | -2.683389 |
| 6 | 5.401875  | -2.957527 | -1.533081 |
| 6 | 5.953173  | -4.029108 | -2.125259 |
| 1 | 6.052887  | -2.107782 | -1.327720 |
| 1 | 7.012067  | -4.048103 | -2.367109 |
| 1 | 5.375193  | -4.903385 | -2.407583 |
| 6 | 3.176786  | 4.610287  | -1.743866 |
| 6 | 2.718919  | 5.613494  | -0.979475 |
| 1 | 3.808162  | 4.870445  | -2.594675 |
| 1 | 2.945857  | 6.647506  | -1.224218 |
| 1 | 2.139446  | 5.438231  | -0.078075 |
| 6 | 1.491763  | 0.092450  | 1.945905  |
| 6 | 1.584349  | 1.498620  | 2.311113  |
| 6 | 0.647702  | -0.804916 | 2.763294  |
| 6 | 0.506413  | 2.233733  | 2.857376  |
| 6 | 2.820453  | 2.191012  | 2.173943  |
| 8 | -0.396527 | -0.529168 | 3.332854  |
| 8 | 1.230335  | -2.034362 | 2.861068  |
| 6 | 0.643139  | 3.565605  | 3.230610  |
| 1 | -0.436795 | 1.720656  | 2.990670  |
| 6 | 2.956454  | 3.535267  | 2.528264  |
| 8 | 3.876120  | 1.464053  | 1.683721  |
| 6 | 1.865329  | 4.224176  | 3.055931  |
| 1 | -0.207558 | 4.096304  | 3.649383  |
| 1 | 3.901236  | 4.040753  | 2.360706  |
| 6 | 5.157663  | 1.866417  | 1.873579  |
| 1 | 1.972129  | 5.271484  | 3.326482  |
| 1 | 5.869295  | 1.180865  | 1.431503  |
| 1 | 5.392857  | 2.410400  | 2.784285  |
| 1 | 2.425560  | -0.367450 | 1.648243  |
| 7 | -0.139903 | -0.527565 | -2.488691 |
| 6 | -1.368764 | -0.881899 | -2.817776 |
| 6 | 0.529090  | -0.307917 | -3.674048 |
| 7 | -1.517527 | -0.899367 | -4.169121 |
| 1 | -2.173413 | -1.124050 | -2.138991 |
| 6 | -0.310023 | -0.534587 | -4.733676 |
| 1 | 1.565192  | -0.003823 | -3.679898 |
| 1 | -2.368894 | -1.132301 | -4.659050 |
| 1 | -0.166724 | -0.474969 | -5.801592 |

|    |           |           |           |
|----|-----------|-----------|-----------|
| 6  | 0.535007  | -3.011564 | 3.657433  |
| 1  | -0.540706 | -2.900569 | 3.500844  |
| 1  | 0.861121  | -3.973920 | 3.253354  |
| 6  | 0.890626  | -2.882662 | 5.133096  |
| 1  | 0.543998  | -1.922856 | 5.526082  |
| 1  | 0.411246  | -3.684802 | 5.707408  |
| 1  | 1.973768  | -2.954459 | 5.279604  |
| 26 | 0.650087  | -0.233640 | -0.301609 |

-----  
<sup>5</sup>A<sub>Fe(his)</sub>  
 -----

Number of imaginary frequencies: 0    Electronic energy:    HF=-2184.5613636  
 Zero-point correction=                    0.667802 (Hartree/Particle)  
 Thermal correction to Energy=            0.714818  
 Thermal correction to Enthalpy=         0.715762  
 Thermal correction to Gibbs Free Energy= 0.578878  
 Sum of electronic and zero-point Energies= -2183.893562  
 Sum of electronic and thermal Energies= -2183.846546  
 Sum of electronic and thermal Enthalpies= -2183.845602  
 Sum of electronic and thermal Free Energies= -2183.982486

-----  
 Cartesian Coordinates  
 -----

|   |           |           |           |
|---|-----------|-----------|-----------|
| 6 | -1.667262 | -3.438676 | -0.692007 |
| 6 | -0.363671 | -2.795041 | -0.630464 |
| 7 | -0.523169 | -1.445757 | -0.444728 |
| 6 | -1.867370 | -1.197020 | -0.385344 |
| 6 | -2.604449 | -2.444709 | -0.540458 |
| 6 | 0.864149  | -3.454365 | -0.758125 |
| 6 | 2.148288  | -2.891952 | -0.752539 |
| 7 | 2.416450  | -1.566495 | -0.544525 |
| 6 | 3.762614  | -1.387043 | -0.692027 |
| 6 | 4.397698  | -2.674498 | -0.997145 |
| 6 | 3.384392  | -3.611853 | -1.006613 |
| 6 | 4.412984  | -0.158031 | -0.532195 |
| 6 | 3.835729  | 1.105344  | -0.333701 |
| 7 | 2.488798  | 1.355358  | -0.243516 |
| 6 | 2.330239  | 2.702270  | -0.080672 |
| 6 | 3.637195  | 3.352295  | -0.060728 |
| 6 | 4.575803  | 2.347762  | -0.221913 |
| 6 | 1.096928  | 3.358753  | 0.056804  |
| 6 | -0.181024 | 2.793715  | 0.040919  |
| 7 | -0.438374 | 1.453425  | -0.040920 |
| 6 | -1.794029 | 1.300843  | -0.091259 |
| 6 | -2.443545 | 2.609242  | -0.006697 |
| 6 | -1.437887 | 3.538027  | 0.077663  |
| 6 | -1.550064 | 5.031253  | 0.162491  |
| 6 | -3.926284 | 2.846867  | -0.060867 |
| 6 | -4.475417 | 2.857743  | -1.498322 |
| 6 | -5.973338 | 3.065863  | -1.549270 |

|   |           |           |           |
|---|-----------|-----------|-----------|
| 8 | -6.709928 | 3.189691  | -0.594725 |
| 6 | -2.447527 | 0.069688  | -0.220814 |
| 6 | 6.064337  | 2.487633  | -0.325903 |
| 6 | 3.837760  | 4.792055  | 0.063107  |
| 6 | 4.908373  | 5.423148  | 0.572043  |
| 6 | 3.483931  | -5.078493 | -1.303146 |
| 6 | 5.809379  | -2.942401 | -1.263991 |
| 6 | 6.690250  | -2.143655 | -1.886713 |
| 6 | -4.100757 | -2.581404 | -0.505194 |
| 6 | -4.659418 | -2.624037 | 0.927914  |
| 6 | -6.166421 | -2.756124 | 0.965181  |
| 8 | -6.899996 | -2.842901 | 0.004749  |
| 6 | -1.893045 | -4.908407 | -0.891247 |
| 8 | -6.428196 | 3.099784  | -2.827232 |
| 8 | -6.633443 | -2.770278 | 2.239891  |
| 1 | 1.138360  | 4.437405  | 0.168719  |
| 1 | -3.533034 | 0.100176  | -0.220350 |
| 1 | 0.813406  | -4.527550 | -0.916646 |
| 1 | 5.494899  | -0.186031 | -0.578777 |
| 1 | 6.499769  | 1.708674  | -0.960522 |
| 1 | 6.333671  | 3.459663  | -0.752930 |
| 1 | 6.557519  | 2.418154  | 0.653995  |
| 1 | 4.522255  | -5.423221 | -1.291463 |
| 1 | 2.925870  | -5.678261 | -0.573330 |
| 1 | 3.075906  | -5.318816 | -2.294336 |
| 1 | -1.380307 | -5.277433 | -1.788509 |
| 1 | -1.517594 | -5.497189 | -0.043508 |
| 1 | -2.956531 | -5.139991 | -1.003916 |
| 1 | -2.588597 | 5.349139  | 0.297426  |
| 1 | -0.971309 | 5.433425  | 1.003784  |
| 1 | -1.173095 | 5.519485  | -0.746261 |
| 1 | 3.018133  | 5.412526  | -0.299388 |
| 1 | 4.953861  | 6.508219  | 0.597187  |
| 1 | 5.754499  | 4.892676  | 0.996918  |
| 1 | 6.163495  | -3.922995 | -0.942590 |
| 1 | 7.720097  | -2.457490 | -2.031663 |
| 1 | 6.412844  | -1.177922 | -2.297696 |
| 1 | -4.462048 | 2.082018  | 0.513372  |
| 1 | -4.177305 | 3.799667  | 0.417448  |
| 1 | -3.997958 | 3.644782  | -2.095346 |
| 1 | -4.242521 | 1.919022  | -2.016665 |
| 1 | -7.393908 | 3.227542  | -2.765376 |
| 1 | -4.413907 | -3.489761 | -1.030292 |
| 1 | -4.577357 | -1.754556 | -1.044314 |
| 1 | -4.229235 | -3.462412 | 1.490677  |
| 1 | -4.379329 | -1.723552 | 1.488590  |
| 1 | -7.603423 | -2.853277 | 2.168713  |
| 7 | 1.143789  | -0.369384 | 2.172875  |
| 6 | 1.978436  | -1.195907 | 2.775460  |
| 6 | 0.441389  | 0.274288  | 3.170664  |

|    |           |           |           |
|----|-----------|-----------|-----------|
| 7  | 1.842282  | -1.111959 | 4.123621  |
| 1  | 2.677868  | -1.850278 | 2.276653  |
| 6  | 0.861571  | -0.174518 | 4.393880  |
| 1  | -0.310173 | 1.011664  | 2.932001  |
| 1  | 2.368588  | -1.638602 | 4.805462  |
| 1  | 0.567242  | 0.075337  | 5.401358  |
| 26 | 0.998223  | -0.085725 | -0.029698 |

-----  
<sup>5</sup>BFe(his)  
-----

Number of imaginary frequencies: 0    Electronic energy:    HF=-2946.0792397  
Zero-point correction=                    0.890097 (Hartree/Particle)  
Thermal correction to Energy=            0.954245  
Thermal correction to Enthalpy=         0.955189  
Thermal correction to Gibbs Free Energy= 0.777757  
Sum of electronic and zero-point Energies= -2945.189142  
Sum of electronic and thermal Energies= -2945.124995  
Sum of electronic and thermal Enthalpies= -2945.124051  
Sum of electronic and thermal Free Energies= -2945.301482

-----  
Cartesian Coordinates  
-----

|   |           |           |           |
|---|-----------|-----------|-----------|
| 6 | 2.735071  | 2.412460  | 1.863109  |
| 6 | 2.149555  | 1.118983  | 1.550828  |
| 7 | 0.841520  | 1.275778  | 1.176660  |
| 6 | 0.564310  | 2.612802  | 1.196736  |
| 6 | 1.756287  | 3.355757  | 1.625771  |
| 6 | 2.830877  | -0.102434 | 1.595227  |
| 6 | 2.368128  | -1.365845 | 1.201740  |
| 7 | 1.116676  | -1.630516 | 0.718921  |
| 6 | 1.060831  | -2.970199 | 0.427457  |
| 6 | 2.330301  | -3.596343 | 0.740723  |
| 6 | 3.150275  | -2.598074 | 1.238820  |
| 6 | -0.058118 | -3.631911 | -0.104470 |
| 6 | -1.297685 | -3.082675 | -0.443108 |
| 7 | -1.641468 | -1.771655 | -0.259607 |
| 6 | -2.898956 | -1.606057 | -0.765521 |
| 6 | -3.406034 | -2.885656 | -1.264044 |
| 6 | -2.407247 | -3.803969 | -1.065184 |
| 7 | -1.868187 | 1.134019  | 0.091472  |
| 6 | -3.109196 | 0.876868  | -0.427748 |
| 6 | -3.868856 | 2.116145  | -0.509193 |
| 6 | -3.058875 | 3.110914  | -0.010764 |
| 6 | -1.802831 | 2.477727  | 0.358165  |
| 6 | -3.578356 | -0.383772 | -0.824103 |
| 6 | -0.687544 | 3.152423  | 0.875048  |
| 8 | 6.543753  | -1.365584 | -1.230426 |
| 6 | 6.033829  | -0.135597 | -0.960992 |
| 8 | 6.382050  | 0.551851  | -0.013592 |
| 6 | 5.024596  | 0.255949  | -1.946706 |

|   |           |           |           |
|---|-----------|-----------|-----------|
| 7 | 4.722291  | -0.649541 | -2.856684 |
| 7 | 4.452561  | -1.427289 | -3.639491 |
| 6 | 4.378123  | 1.584225  | -2.000245 |
| 6 | 5.120067  | 2.738618  | -1.716022 |
| 6 | 4.531831  | 4.002345  | -1.752503 |
| 6 | 3.186525  | 4.125559  | -2.093712 |
| 6 | 2.425319  | 2.992780  | -2.387480 |
| 6 | 3.009015  | 1.722502  | -2.334347 |
| 8 | 2.339461  | 0.564725  | -2.591874 |
| 6 | 0.939725  | 0.620665  | -2.842415 |
| 1 | -0.803572 | 4.219138  | 1.026386  |
| 1 | -4.581226 | -0.414590 | -1.234259 |
| 1 | 0.060144  | -4.694275 | -0.293140 |
| 1 | 3.857993  | -0.051831 | 1.939576  |
| 1 | 6.164742  | 2.632464  | -1.447394 |
| 1 | 5.124784  | 4.881926  | -1.520044 |
| 1 | 1.377029  | 3.100547  | -2.639411 |
| 1 | 2.716581  | 5.104444  | -2.125389 |
| 1 | 0.617111  | -0.415647 | -2.951173 |
| 1 | 0.402051  | 1.080271  | -2.005394 |
| 1 | 0.723690  | 1.171230  | -3.767720 |
| 6 | 7.589632  | -1.845863 | -0.357911 |
| 1 | 7.481864  | -2.932861 | -0.376716 |
| 1 | 7.402893  | -1.483462 | 0.655124  |
| 6 | 8.959041  | -1.404497 | -0.853964 |
| 1 | 9.050632  | -0.315046 | -0.809428 |
| 1 | 9.743164  | -1.840764 | -0.224006 |
| 1 | 9.124617  | -1.731093 | -1.885898 |
| 6 | 4.159796  | 2.625472  | 2.278966  |
| 1 | 4.384664  | 3.686629  | 2.418524  |
| 1 | 4.386397  | 2.109092  | 3.221680  |
| 1 | 4.854387  | 2.235758  | 1.524493  |
| 6 | 2.670671  | -5.037656 | 0.510721  |
| 1 | 3.732925  | -5.151452 | 0.268674  |
| 1 | 2.473137  | -5.658084 | 1.396439  |
| 1 | 2.092026  | -5.461918 | -0.316336 |
| 6 | 1.918433  | 4.800799  | 1.768091  |
| 6 | 1.332934  | 5.772974  | 1.050593  |
| 1 | 2.628150  | 5.108551  | 2.536796  |
| 1 | 1.542226  | 6.818719  | 1.257555  |
| 1 | 0.660109  | 5.566018  | 0.224492  |
| 6 | 4.532302  | -2.674038 | 1.696948  |
| 6 | 5.170616  | -3.749033 | 2.189682  |
| 1 | 5.095099  | -1.743125 | 1.638665  |
| 1 | 6.210576  | -3.683026 | 2.497140  |
| 1 | 4.685276  | -4.709245 | 2.330311  |
| 6 | -3.360186 | 4.573682  | 0.132753  |
| 1 | -4.330885 | 4.831441  | -0.302194 |
| 1 | -3.382525 | 4.881995  | 1.186384  |
| 1 | -2.602706 | 5.193603  | -0.363385 |

|    |           |           |           |
|----|-----------|-----------|-----------|
| 6  | -5.268756 | 2.247238  | -1.041834 |
| 1  | -5.443661 | 3.272935  | -1.385879 |
| 1  | -5.406526 | 1.595681  | -1.912296 |
| 6  | -4.778695 | -3.087883 | -1.845554 |
| 1  | -4.797354 | -4.000608 | -2.450362 |
| 1  | -5.007501 | -2.265646 | -2.530149 |
| 6  | -5.899843 | -3.178215 | -0.765100 |
| 1  | -5.493677 | -2.845237 | 0.199485  |
| 1  | -6.241059 | -4.206239 | -0.621300 |
| 6  | -6.356510 | 1.887370  | 0.012922  |
| 1  | -6.224021 | 0.851446  | 0.332106  |
| 1  | -6.258771 | 2.545471  | 0.880499  |
| 6  | -7.133646 | -2.321217 | -0.995720 |
| 8  | -8.267207 | -2.654317 | -0.727089 |
| 8  | -6.812072 | -1.096442 | -1.469245 |
| 1  | -7.598217 | -0.497963 | -1.448907 |
| 6  | -7.739125 | 2.028693  | -0.574636 |
| 8  | -8.352081 | 1.171960  | -1.192740 |
| 8  | -8.254834 | 3.261359  | -0.397108 |
| 1  | -9.123631 | 3.266484  | -0.844022 |
| 6  | -2.395981 | -5.263945 | -1.408354 |
| 1  | -2.292281 | -5.891394 | -0.512981 |
| 1  | -3.319255 | -5.565379 | -1.912588 |
| 1  | -1.560087 | -5.516558 | -2.073429 |
| 7  | -1.209236 | -0.630187 | 2.788751  |
| 6  | -0.778281 | 0.029202  | 3.848351  |
| 6  | -2.148961 | -1.531742 | 3.243924  |
| 7  | -1.403616 | -0.410685 | 4.969970  |
| 1  | -0.033063 | 0.810633  | 3.836269  |
| 6  | -2.284881 | -1.411049 | 4.600839  |
| 1  | -2.653237 | -2.198274 | 2.560550  |
| 1  | -1.247516 | -0.068415 | 5.906891  |
| 1  | -2.904420 | -1.925230 | 5.319105  |
| 26 | -0.486562 | -0.301612 | 0.713408  |

---

<sup>5</sup>C<sub>Fe(his)</sub>

---

Number of imaginary frequencies: 0    Electronic energy:    HF=-2946.0402448  
Zero-point correction=                    0.884815 (Hartree/Particle)  
Thermal correction to Energy=            0.951220  
Thermal correction to Enthalpy=         0.952164  
Thermal correction to Gibbs Free Energy= 0.768096  
Sum of electronic and zero-point Energies= -2945.155430  
Sum of electronic and thermal Energies= -2945.089025  
Sum of electronic and thermal Enthalpies= -2945.088081  
Sum of electronic and thermal Free Energies= -2945.272149

---

Cartesian Coordinates

---

|   |          |           |           |
|---|----------|-----------|-----------|
| 6 | 3.198293 | -3.356151 | -1.285654 |
|---|----------|-----------|-----------|



|   |           |           |           |
|---|-----------|-----------|-----------|
| 6 | 1.992269  | -2.742626 | -0.757319 |
| 7 | 2.072271  | -1.380941 | -0.866870 |
| 6 | 3.253855  | -1.086514 | -1.479099 |
| 6 | 3.985750  | -2.323114 | -1.761484 |
| 6 | 0.866229  | -3.440601 | -0.299068 |
| 6 | -0.386859 | -2.910439 | 0.023144  |
| 7 | -0.698403 | -1.577658 | 0.047186  |
| 6 | -2.041535 | -1.474757 | 0.278249  |
| 6 | -2.615943 | -2.806924 | 0.428213  |
| 6 | -1.582644 | -3.700582 | 0.282732  |
| 6 | -2.760202 | -0.276175 | 0.360486  |
| 6 | -2.265524 | 1.022079  | 0.207748  |
| 7 | -0.966716 | 1.334881  | -0.065587 |
| 6 | -0.885627 | 2.693505  | -0.180735 |
| 6 | -2.197442 | 3.287688  | 0.055652  |
| 6 | -3.057806 | 2.246386  | 0.297954  |
| 6 | 0.264023  | 3.405930  | -0.535249 |
| 6 | 1.509083  | 2.881329  | -0.906985 |
| 7 | 1.811045  | 1.549668  | -0.944147 |
| 6 | 3.025080  | 1.415372  | -1.561744 |
| 6 | 3.541685  | 2.722676  | -1.915788 |
| 6 | 2.618628  | 3.649236  | -1.471135 |
| 6 | 3.679005  | 0.203670  | -1.815071 |
| 1 | 0.156854  | 4.481047  | -0.617719 |
| 1 | 4.625233  | 0.279554  | -2.341126 |
| 1 | 0.946495  | -4.522735 | -0.278047 |
| 1 | -3.821654 | -0.366544 | 0.560238  |
| 6 | 1.043289  | 0.257999  | 1.898818  |
| 6 | 1.863075  | 1.247190  | 2.571134  |
| 6 | 1.298372  | 2.125288  | 3.530711  |
| 6 | 3.248783  | 1.414905  | 2.264147  |
| 6 | 2.026949  | 3.165964  | 4.093118  |
| 1 | 0.250572  | 1.997603  | 3.779313  |
| 6 | 3.983423  | 2.450354  | 2.853374  |
| 6 | 3.370454  | 3.327791  | 3.748685  |
| 1 | 1.552837  | 3.843319  | 4.797409  |
| 1 | 5.033891  | 2.577097  | 2.620974  |
| 1 | 3.955781  | 4.132387  | 4.186190  |
| 6 | 0.019369  | -0.359901 | 2.776182  |
| 8 | -1.042495 | 0.146121  | 3.099107  |
| 8 | 0.412190  | -1.588277 | 3.179633  |
| 8 | 3.798062  | 0.482352  | 1.452277  |
| 6 | 5.197219  | 0.520620  | 1.217082  |
| 1 | 5.410866  | -0.339131 | 0.582483  |
| 1 | 5.492243  | 1.439141  | 0.694229  |
| 1 | 5.757712  | 0.436710  | 2.156870  |
| 7 | 3.500261  | -3.301082 | 2.448790  |
| 7 | 3.805947  | -2.384346 | 2.984709  |
| 6 | -4.526019 | 2.320430  | 0.610758  |
| 1 | -4.784596 | 1.572614  | 1.370131  |

|   |           |           |           |
|---|-----------|-----------|-----------|
| 1 | -4.768857 | 3.297549  | 1.040957  |
| 6 | -5.436511 | 2.106262  | -0.629387 |
| 1 | -5.295895 | 1.106632  | -1.043804 |
| 1 | -5.171882 | 2.842064  | -1.396765 |
| 6 | -6.886744 | 2.339344  | -0.271749 |
| 8 | -7.364046 | 3.387000  | 0.096716  |
| 8 | -7.659948 | 1.210579  | -0.380303 |
| 1 | -8.562896 | 1.476762  | -0.118679 |
| 6 | -4.081152 | -3.082214 | 0.622694  |
| 1 | -4.499005 | -2.352136 | 1.321885  |
| 1 | -4.224205 | -4.064555 | 1.085621  |
| 6 | -4.886449 | -3.032363 | -0.712237 |
| 1 | -4.299332 | -2.481535 | -1.458496 |
| 1 | -5.061708 | -4.032376 | -1.115363 |
| 6 | -6.223988 | -2.322512 | -0.643862 |
| 8 | -7.259929 | -2.710031 | -1.137197 |
| 8 | -6.115621 | -1.130363 | -0.005478 |
| 1 | -6.948823 | -0.626074 | -0.116963 |
| 6 | -1.634716 | -5.199380 | 0.325750  |
| 1 | -2.621137 | -5.556859 | 0.637341  |
| 1 | -1.422297 | -5.642785 | -0.656328 |
| 1 | -0.898650 | -5.611232 | 1.027761  |
| 6 | -2.491850 | 4.757962  | 0.022515  |
| 1 | -2.351868 | 5.177801  | -0.982558 |
| 1 | -3.522256 | 4.969735  | 0.323830  |
| 1 | -1.829578 | 5.316441  | 0.695919  |
| 6 | 3.501397  | -4.823827 | -1.270977 |
| 1 | 3.016029  | -5.323631 | -0.426307 |
| 1 | 3.165616  | -5.330868 | -2.186976 |
| 1 | 4.579910  | -4.995641 | -1.186573 |
| 6 | 4.852282  | 2.979616  | -2.598865 |
| 1 | 5.704428  | 2.680482  | -1.973308 |
| 1 | 4.934264  | 2.419247  | -3.538798 |
| 1 | 4.982783  | 4.040103  | -2.832496 |
| 6 | 5.296971  | -2.373048 | -2.397635 |
| 6 | 5.836541  | -3.394594 | -3.083668 |
| 1 | 5.897594  | -1.468134 | -2.303201 |
| 1 | 6.836761  | -3.316286 | -3.500143 |
| 1 | 5.305335  | -4.321839 | -3.271912 |
| 6 | 2.742013  | 5.102135  | -1.571334 |
| 6 | 2.300946  | 6.010751  | -0.687615 |
| 1 | 3.280366  | 5.468506  | -2.446258 |
| 1 | 2.450276  | 7.073243  | -0.858004 |
| 1 | 1.806227  | 5.728494  | 0.237016  |
| 6 | -0.524380 | -2.310541 | 4.011632  |
| 1 | -0.763915 | -1.703171 | 4.890546  |
| 1 | -1.448290 | -2.462390 | 3.445320  |
| 6 | 0.128184  | -3.627257 | 4.390433  |
| 1 | 1.053552  | -3.459525 | 4.951050  |
| 1 | -0.553199 | -4.214282 | 5.016651  |

|    |           |           |           |
|----|-----------|-----------|-----------|
| 1  | 0.368553  | -4.210832 | 3.496006  |
| 7  | -0.161001 | -0.145818 | -2.750810 |
| 6  | 0.250188  | -1.036691 | -3.627538 |
| 6  | -1.022271 | 0.683794  | -3.435063 |
| 7  | -0.309516 | -0.820412 | -4.853384 |
| 1  | 0.942579  | -1.841843 | -3.428036 |
| 6  | -1.131028 | 0.285726  | -4.743186 |
| 1  | -1.504592 | 1.513404  | -2.938766 |
| 1  | -0.148245 | -1.364322 | -5.688139 |
| 1  | -1.693870 | 0.668934  | -5.580796 |
| 26 | 0.678426  | 0.004154  | -0.093924 |

-----  
<sup>5</sup>D<sub>Fe(his)</sub>  
 -----

Number of imaginary frequencies: 0    Electronic energy:    HF=-2836.5401407  
 Zero-point correction=                    0.876852 (Hartree/Particle)  
 Thermal correction to Energy=            0.939114  
 Thermal correction to Enthalpy=         0.940058  
 Thermal correction to Gibbs Free Energy= 0.767794  
 Sum of electronic and zero-point Energies= -2835.663289  
 Sum of electronic and thermal Energies= -2835.601027  
 Sum of electronic and thermal Enthalpies= -2835.600083  
 Sum of electronic and thermal Free Energies= -2835.772347

-----  
 Cartesian Coordinates  
 -----

|   |           |           |           |
|---|-----------|-----------|-----------|
| 6 | 2.165128  | -4.068680 | -0.393075 |
| 6 | 1.013538  | -3.242264 | -0.088741 |
| 7 | 1.215675  | -1.969891 | -0.557755 |
| 6 | 2.447628  | -1.936974 | -1.145798 |
| 6 | 3.064154  | -3.259202 | -1.067184 |
| 6 | -0.140744 | -3.674444 | 0.581721  |
| 6 | -1.272569 | -2.924996 | 0.918429  |
| 7 | -1.440531 | -1.595747 | 0.649086  |
| 6 | -2.666307 | -1.230356 | 1.126172  |
| 6 | -3.333795 | -2.393367 | 1.707786  |
| 6 | -2.457605 | -3.444627 | 1.590044  |
| 6 | -3.184267 | 0.070485  | 1.047835  |
| 6 | -2.569812 | 1.209390  | 0.505540  |
| 7 | -1.305530 | 1.253110  | -0.018687 |
| 6 | -1.082326 | 2.534126  | -0.447651 |
| 6 | -2.254654 | 3.353922  | -0.179929 |
| 6 | -3.183444 | 2.527138  | 0.405020  |
| 6 | 0.087142  | 2.992185  | -1.068900 |
| 6 | 1.220269  | 2.244799  | -1.409596 |
| 7 | 1.304823  | 0.889432  | -1.286697 |
| 6 | 2.534884  | 0.507158  | -1.750835 |
| 6 | 3.264265  | 1.669910  | -2.233127 |
| 6 | 2.461559  | 2.764865  | -1.995876 |

|   |           |           |           |
|---|-----------|-----------|-----------|
| 6 | 3.035072  | -0.799277 | -1.719021 |
| 1 | 0.114535  | 4.045681  | -1.322181 |
| 1 | 4.020018  | -0.935329 | -2.152377 |
| 1 | -0.160552 | -4.720098 | 0.872194  |
| 1 | -4.182470 | 0.214311  | 1.449985  |
| 6 | -4.603830 | 2.845961  | 0.770690  |
| 1 | -4.887854 | 2.336503  | 1.699996  |
| 1 | -4.734965 | 3.916117  | 0.957834  |
| 6 | -5.576710 | 2.420312  | -0.356292 |
| 1 | -5.445116 | 1.365990  | -0.614105 |
| 1 | -5.348905 | 2.997232  | -1.262091 |
| 6 | -7.016240 | 2.699186  | 0.000245  |
| 8 | -7.453624 | 3.703730  | 0.507451  |
| 8 | -7.840533 | 1.646278  | -0.321236 |
| 1 | -8.742679 | 1.914321  | -0.057168 |
| 6 | -4.728098 | -2.443965 | 2.264273  |
| 1 | -5.006249 | -1.494541 | 2.735886  |
| 1 | -4.776958 | -3.199432 | 3.056819  |
| 6 | -5.814480 | -2.821437 | 1.209773  |
| 1 | -5.464506 | -3.661007 | 0.604421  |
| 1 | -6.729451 | -3.115754 | 1.734702  |
| 6 | -6.153154 | -1.674519 | 0.283256  |
| 8 | -5.705238 | -1.498581 | -0.835372 |
| 8 | -7.020166 | -0.822452 | 0.868090  |
| 1 | -7.219664 | -0.084064 | 0.250540  |
| 6 | -2.641696 | -4.866369 | 2.031671  |
| 1 | -3.544415 | -4.988574 | 2.638791  |
| 1 | -2.727526 | -5.551997 | 1.177691  |
| 1 | -1.792797 | -5.212915 | 2.634216  |
| 6 | -2.383793 | 4.810052  | -0.516382 |
| 1 | -2.369650 | 4.980258  | -1.601058 |
| 1 | -3.316577 | 5.232141  | -0.129579 |
| 1 | -1.558201 | 5.394953  | -0.092003 |
| 6 | 2.336795  | -5.503361 | 0.004487  |
| 1 | 1.745382  | -5.749862 | 0.892138  |
| 1 | 2.029977  | -6.194884 | -0.793061 |
| 1 | 3.386428  | -5.721704 | 0.231079  |
| 6 | 4.656906  | 1.647094  | -2.787746 |
| 1 | 5.398069  | 1.442600  | -2.003359 |
| 1 | 4.774884  | 0.871815  | -3.555039 |
| 1 | 4.924467  | 2.606246  | -3.241164 |
| 6 | 4.392013  | -3.574389 | -1.578961 |
| 6 | 4.876626  | -4.780647 | -1.922223 |
| 1 | 5.060762  | -2.722218 | -1.693979 |
| 1 | 5.895927  | -4.884417 | -2.283478 |
| 1 | 4.282142  | -5.687409 | -1.886148 |
| 6 | 2.809857  | 4.158072  | -2.266318 |
| 6 | 2.468559  | 5.235598  | -1.542736 |
| 1 | 3.444532  | 4.317576  | -3.139109 |
| 1 | 2.790876  | 6.229854  | -1.839182 |

|    |           |           |           |
|----|-----------|-----------|-----------|
| 1  | 1.895714  | 5.161549  | -0.623541 |
| 6  | 3.803166  | 0.602960  | 1.968501  |
| 6  | 5.072627  | 1.145676  | 1.674278  |
| 6  | 2.666951  | 1.337719  | 2.517334  |
| 6  | 5.418058  | 2.516786  | 1.884223  |
| 6  | 6.110240  | 0.300444  | 1.150102  |
| 8  | 2.625068  | 2.524189  | 2.821391  |
| 8  | 1.605488  | 0.499016  | 2.672158  |
| 6  | 6.683823  | 2.995623  | 1.600891  |
| 1  | 4.648315  | 3.168285  | 2.277137  |
| 6  | 7.381743  | 0.794645  | 0.855958  |
| 8  | 5.775336  | -1.007823 | 0.942745  |
| 6  | 7.669285  | 2.140544  | 1.078673  |
| 1  | 6.912691  | 4.043734  | 1.771612  |
| 1  | 8.125067  | 0.137253  | 0.418108  |
| 6  | 6.718748  | -1.973909 | 0.830399  |
| 1  | 8.654868  | 2.525069  | 0.831488  |
| 1  | 6.296726  | -2.946875 | 0.620070  |
| 1  | 7.651765  | -1.847757 | 1.370313  |
| 1  | 3.632967  | -0.449235 | 1.780684  |
| 7  | -1.329809 | -0.869579 | -2.413626 |
| 6  | -2.599504 | -1.241862 | -2.421510 |
| 6  | -0.962134 | -0.711649 | -3.734660 |
| 7  | -3.060483 | -1.329158 | -3.693694 |
| 1  | -3.217432 | -1.440335 | -1.558445 |
| 6  | -2.026447 | -0.994162 | -4.548769 |
| 1  | 0.038246  | -0.403755 | -4.000489 |
| 1  | -4.003435 | -1.582201 | -3.951551 |
| 1  | -2.142816 | -0.990811 | -5.621421 |
| 6  | 0.400362  | 1.073380  | 3.223213  |
| 1  | 0.274212  | 2.081937  | 2.822947  |
| 1  | -0.399971 | 0.434440  | 2.846182  |
| 6  | 0.441859  | 1.085785  | 4.745737  |
| 1  | 1.239452  | 1.742325  | 5.105444  |
| 1  | -0.512275 | 1.454886  | 5.140838  |
| 1  | 0.608984  | 0.076975  | 5.138622  |
| 26 | -0.170772 | -0.417273 | -0.555267 |

---

$1\text{CSS}A_{\text{FE}}(\text{eys})$

---

Number of imaginary frequencies: 0    Electronic energy:    HF=-2396.4789516  
Zero-point correction=                    0.634862 (Hartree/Particle)  
Thermal correction to Energy=            0.679956  
Thermal correction to Enthalpy=         0.680900  
Thermal correction to Gibbs Free Energy=    0.551580  
Sum of electronic and zero-point Energies=    -2395.844089  
Sum of electronic and thermal Energies=    -2395.798996  
Sum of electronic and thermal Enthalpies=   -2395.798051

Sum of electronic and thermal Free Energies= -2395.927372

.....  
Cartesian Coordinates

.....  
26 1.047720 -0.070787 -0.021412  
7 2.404005 -1.525768 -0.379996  
6 2.152694 -2.862363 -0.575321  
6 3.382245 -3.605580 -0.736558  
6 4.406542 -2.687397 -0.664317  
6 3.768527 -1.395073 -0.412389  
6 0.885567 -3.437136 -0.622073  
6 -0.317090 -2.758122 -0.502666  
7 -0.439062 -1.402095 -0.312479  
6 -1.786761 -1.160030 -0.259257  
6 -2.544275 -2.396712 -0.403607  
6 -1.622649 -3.395931 -0.560168  
6 -2.362375 0.098635 -0.127824  
6 -1.673081 1.302037 -0.042588  
7 -0.309006 1.422291 -0.025917  
6 -0.060852 2.766500 0.095588  
6 -1.302417 3.524661 0.140204  
6 -2.313565 2.608329 0.052852  
6 1.198924 3.340525 0.179489  
6 2.408819 2.656646 0.126451  
6 3.720629 3.289511 0.236889  
6 4.641828 2.266614 0.156951  
6 3.879059 1.045562 -0.003739  
7 2.528574 1.301876 -0.015061  
6 4.451354 -0.209598 -0.176948  
1 0.835539 -4.511720 -0.770072  
1 5.530907 -0.272414 -0.126704  
1 1.239083 4.416962 0.309172  
1 -3.447034 0.147350 -0.110028  
16 1.118868 -0.197752 2.302632  
6 0.585164 -1.888763 2.781387  
1 1.202582 -2.660953 2.309735  
1 0.694316 -1.982587 3.869281  
1 -0.463209 -2.081202 2.525627  
6 -1.394377 5.016943 0.261281  
1 -0.866503 5.383063 1.151803  
1 -0.949206 5.527948 -0.603940  
1 -2.434938 5.350070 0.337778  
6 -1.853969 -4.865608 -0.752220  
1 -1.353625 -5.241141 -1.654915  
1 -1.468055 -5.454161 0.091741  
1 -2.920535 -5.094901 -0.849961  
6 3.469442 -5.080696 -0.993850  
1 2.902860 -5.654519 -0.248888  
1 3.062632 -5.349177 -1.979229  
1 4.505073 -5.434364 -0.966116

|   |           |           |           |
|---|-----------|-----------|-----------|
| 6 | 6.136961  | 2.367327  | 0.168535  |
| 1 | 6.548534  | 2.315490  | 1.187156  |
| 1 | 6.602722  | 1.559130  | -0.405753 |
| 1 | 6.466093  | 3.319964  | -0.262787 |
| 6 | 5.824507  | -2.985350 | -0.832415 |
| 6 | 6.785988  | -2.207085 | -1.358204 |
| 1 | 6.121476  | -3.986896 | -0.514816 |
| 1 | 7.811974  | -2.560164 | -1.425126 |
| 1 | 6.584084  | -1.217128 | -1.754720 |
| 6 | 3.933475  | 4.724133  | 0.356150  |
| 6 | 4.995046  | 5.363633  | 0.879862  |
| 1 | 3.126284  | 5.347212  | -0.030976 |
| 1 | 5.039400  | 6.449741  | 0.889574  |
| 1 | 5.829354  | 4.840155  | 1.335406  |
| 6 | -4.041407 | -2.510102 | -0.344044 |
| 6 | -4.577512 | -2.472073 | 1.098347  |
| 1 | -4.374720 | -3.441010 | -0.816162 |
| 1 | -4.516989 | -1.703743 | -0.915760 |
| 1 | -4.137414 | -3.279392 | 1.697877  |
| 1 | -4.277560 | -1.545860 | 1.603930  |
| 6 | -3.795139 | 2.856080  | 0.012869  |
| 6 | -4.367147 | 2.788273  | -1.414516 |
| 1 | -4.030339 | 3.838459  | 0.436621  |
| 1 | -4.328254 | 2.130618  | 0.639616  |
| 1 | -3.865006 | 3.514636  | -2.067293 |
| 1 | -4.171937 | 1.809948  | -1.870377 |
| 6 | -6.080950 | -2.593137 | 1.180148  |
| 8 | -6.849374 | -2.721112 | 0.249971  |
| 8 | -6.520768 | -2.546888 | 2.467331  |
| 1 | -7.491996 | -2.622776 | 2.412399  |
| 6 | -5.852724 | 3.055169  | -1.479660 |
| 8 | -6.576282 | 3.359469  | -0.555160 |
| 8 | -6.332839 | 2.921905  | -2.747234 |
| 1 | -7.288554 | 3.107806  | -2.682428 |

---

**1CSSB<sub>FE(cys)</sub>**

---

Number of imaginary frequencies: 0    Electronic energy:    HF=-3157.9972622  
Zero-point correction=                    0.856930 (Hartree/Particle)  
Thermal correction to Energy=            0.919264  
Thermal correction to Enthalpy=         0.920209  
Thermal correction to Gibbs Free Energy=    0.750267  
Sum of electronic and zero-point Energies=    -3157.140332  
Sum of electronic and thermal Energies=    -3157.077998  
Sum of electronic and thermal Enthalpies=   -3157.077054  
Sum of electronic and thermal Free Energies=   -3157.246995

.....  
Cartesian Coordinates

.....  
6        -8.494014   -3.744776   0.542899

|    |           |           |           |
|----|-----------|-----------|-----------|
| 6  | -7.437961 | -4.257404 | 1.291505  |
| 6  | -6.383488 | -3.425236 | 1.668944  |
| 6  | -6.351852 | -2.072469 | 1.298496  |
| 6  | -7.424109 | -1.572562 | 0.516525  |
| 6  | -8.489010 | -2.402314 | 0.155785  |
| 6  | -5.223608 | -1.213043 | 1.708213  |
| 7  | -5.428913 | 0.065753  | 1.952006  |
| 7  | -5.594144 | 1.167147  | 2.177221  |
| 8  | -7.330478 | -0.259071 | 0.148225  |
| 6  | -8.339022 | 0.301569  | -0.673962 |
| 26 | 0.968228  | 1.042243  | -0.547985 |
| 7  | 0.296588  | 2.919680  | -0.227454 |
| 6  | 1.010838  | 3.998814  | 0.214631  |
| 6  | 0.175669  | 5.196605  | 0.258943  |
| 6  | -1.073259 | 4.803884  | -0.172918 |
| 6  | -0.970534 | 3.391354  | -0.478331 |
| 6  | 2.361783  | 3.971188  | 0.547913  |
| 6  | 3.177943  | 2.850165  | 0.522894  |
| 7  | 2.764421  | 1.587298  | 0.180737  |
| 6  | 3.875854  | 0.794891  | 0.292696  |
| 6  | 5.035789  | 1.576847  | 0.708467  |
| 6  | 4.595988  | 2.861972  | 0.859676  |
| 6  | -2.024893 | 2.624639  | -0.962963 |
| 6  | -1.995597 | 1.260679  | -1.222047 |
| 7  | -0.907906 | 0.452401  | -1.004646 |
| 6  | -1.347064 | -0.831369 | -1.231225 |
| 6  | -2.745244 | -0.846631 | -1.601769 |
| 6  | -3.153536 | 0.468350  | -1.635365 |
| 6  | 3.900026  | -0.576697 | 0.079216  |
| 6  | 2.806694  | -1.364934 | -0.260471 |
| 7  | 1.548439  | -0.892509 | -0.517948 |
| 6  | 0.787047  | -2.003292 | -0.795221 |
| 6  | 1.580847  | -3.217460 | -0.696427 |
| 6  | 2.847504  | -2.818012 | -0.360810 |
| 6  | -0.560137 | -1.975378 | -1.128297 |
| 6  | -3.841216 | -1.688827 | 1.915704  |
| 8  | -3.035213 | -0.695373 | 2.329634  |
| 8  | -3.485555 | -2.842830 | 1.742780  |
| 1  | -1.045784 | -2.926578 | -1.322329 |
| 1  | -2.973188 | 3.126054  | -1.110345 |
| 1  | 2.823692  | 4.908872  | 0.838919  |
| 1  | 4.847355  | -1.081193 | 0.221347  |
| 1  | -5.554394 | -3.822013 | 2.240575  |
| 1  | -7.430073 | -5.301870 | 1.590160  |
| 1  | -9.308072 | -2.011550 | -0.437162 |
| 1  | -9.324504 | -4.381595 | 0.249452  |
| 1  | -8.026403 | 1.329795  | -0.863476 |
| 1  | -8.424519 | -0.234927 | -1.627936 |
| 1  | -9.315252 | 0.301690  | -0.170251 |
| 6  | 0.733427  | 0.381584  | -3.835160 |



|    |           |           |           |
|----|-----------|-----------|-----------|
| 1  | -0.334483 | 0.626371  | -3.848227 |
| 1  | 1.126241  | 0.508679  | -4.851929 |
| 1  | 0.843697  | -0.672129 | -3.556616 |
| 16 | 1.683129  | 1.485779  | -2.716314 |
| 6  | 5.368054  | 4.079721  | 1.272284  |
| 1  | 6.422603  | 3.844574  | 1.451717  |
| 1  | 5.331520  | 4.863347  | 0.503697  |
| 1  | 4.969893  | 4.521915  | 2.196114  |
| 6  | 1.056643  | -4.604934 | -0.920991 |
| 1  | 0.186762  | -4.818018 | -0.285893 |
| 1  | 0.734409  | -4.754901 | -1.960689 |
| 1  | 1.816209  | -5.364041 | -0.704515 |
| 6  | -3.538727 | -2.081080 | -1.913958 |
| 1  | -3.112809 | -2.631757 | -2.763868 |
| 1  | -3.562114 | -2.769184 | -1.059179 |
| 1  | -4.573665 | -1.837209 | -2.172941 |
| 6  | -2.320999 | 5.628325  | -0.271166 |
| 1  | -2.426601 | 6.109383  | -1.254864 |
| 1  | -3.219389 | 5.022309  | -0.111306 |
| 1  | -2.317316 | 6.428486  | 0.477998  |
| 6  | 0.629906  | 6.497886  | 0.727031  |
| 6  | 0.131153  | 7.708492  | 0.418230  |
| 1  | 1.478357  | 6.475231  | 1.412027  |
| 1  | 0.551185  | 8.610345  | 0.856311  |
| 1  | -0.679839 | 7.845616  | -0.289766 |
| 6  | -4.485992 | 0.937686  | -2.004027 |
| 6  | -4.809196 | 2.073329  | -2.645381 |
| 1  | -5.301054 | 0.262315  | -1.739864 |
| 1  | -5.846435 | 2.311353  | -2.869794 |
| 1  | -4.061741 | 2.782283  | -2.987877 |
| 6  | 4.051940  | -3.677115 | -0.097533 |
| 6  | 5.075028  | -3.692107 | -1.274685 |
| 1  | 3.735381  | -4.708961 | 0.097246  |
| 1  | 4.580017  | -3.333524 | 0.799565  |
| 1  | 4.578367  | -4.022458 | -2.190179 |
| 1  | 5.465103  | -2.682962 | -1.427040 |
| 6  | 6.421841  | 1.015932  | 0.875862  |
| 6  | 6.598629  | 0.082450  | 2.113055  |
| 1  | 7.147771  | 1.833542  | 0.947331  |
| 1  | 6.685271  | 0.454098  | -0.026221 |
| 1  | 7.073259  | 0.600834  | 2.950183  |
| 1  | 5.607328  | -0.238948 | 2.458255  |
| 6  | 6.227986  | -4.610418 | -0.963684 |
| 8  | 7.183976  | -4.367275 | -0.241548 |
| 8  | 6.098212  | -5.828969 | -1.536909 |
| 1  | 6.866200  | -6.350016 | -1.232704 |
| 6  | 7.379423  | -1.196603 | 1.863951  |
| 8  | 8.198416  | -1.681910 | 2.617237  |
| 8  | 7.001880  | -1.780573 | 0.705939  |
| 1  | 7.383542  | -2.682850 | 0.605660  |

|   |           |           |          |
|---|-----------|-----------|----------|
| 6 | -1.630764 | -1.027384 | 2.502781 |
| 6 | -0.914039 | 0.243052  | 2.917049 |
| 1 | -1.247922 | -1.420054 | 1.558452 |
| 1 | -1.556840 | -1.813747 | 3.261907 |
| 1 | 0.149424  | 0.026723  | 3.066778 |
| 1 | -0.995317 | 1.006395  | 2.137828 |
| 1 | -1.323678 | 0.642926  | 3.851646 |

---

1CSS<sup>TS</sup>(B-C)<sub>FE(cys)</sub>

---

Number of imaginary frequencies: 1    Electronic energy:    HF=-3157.9434826  
Zero-point correction=                    0.854600 (Hartree/Particle)  
Thermal correction to Energy=            0.915669  
Thermal correction to Enthalpy=         0.916613  
Thermal correction to Gibbs Free Energy= 0.758012  
Sum of electronic and zero-point Energies= -3157.088883  
Sum of electronic and thermal Energies= -3157.027814  
Sum of electronic and thermal Enthalpies= -3157.026869  
Sum of electronic and thermal Free Energies= -3157.185470

.....  
Cartesian Coordinates

.....

|    |           |           |           |
|----|-----------|-----------|-----------|
| 6  | -1.116458 | -3.904761 | 3.579630  |
| 6  | 0.123264  | -3.305319 | 3.391539  |
| 6  | 0.204088  | -2.039493 | 2.808166  |
| 6  | -0.931894 | -1.331296 | 2.375245  |
| 6  | -2.186219 | -1.976393 | 2.562687  |
| 6  | -2.269633 | -3.234286 | 3.170433  |
| 6  | -0.785454 | 0.002487  | 1.688843  |
| 7  | -2.196565 | 0.937988  | 2.272336  |
| 7  | -2.959660 | 1.697671  | 1.967862  |
| 8  | -3.294295 | -1.296679 | 2.157822  |
| 6  | -4.574223 | -1.868496 | 2.335337  |
| 26 | -0.746642 | 0.128992  | -0.478109 |
| 7  | -2.228666 | 1.466195  | -0.673831 |
| 6  | -2.127989 | 2.831096  | -0.686440 |
| 6  | -3.436199 | 3.443475  | -0.910199 |
| 6  | -4.326118 | 2.401588  | -1.050296 |
| 6  | -3.552196 | 1.182793  | -0.917017 |
| 6  | -0.935984 | 3.544962  | -0.600450 |
| 6  | 0.338531  | 2.991679  | -0.532128 |
| 7  | 0.603763  | 1.655906  | -0.439455 |
| 6  | 1.965400  | 1.534795  | -0.494413 |
| 6  | 2.594953  | 2.848185  | -0.598134 |
| 6  | 1.575925  | 3.761330  | -0.615157 |
| 6  | -4.086946 | -0.092795 | -1.059204 |
| 6  | -3.384894 | -1.293917 | -0.998736 |
| 7  | -2.058358 | -1.398629 | -0.700180 |
| 6  | -1.776201 | -2.739559 | -0.657149 |
| 6  | -2.967050 | -3.522652 | -0.906267 |

|    |           |           |           |
|----|-----------|-----------|-----------|
| 6  | -3.980479 | -2.622865 | -1.163156 |
| 6  | 2.667632  | 0.338034  | -0.444481 |
| 6  | 2.115391  | -0.937062 | -0.372973 |
| 7  | 0.781935  | -1.219324 | -0.392522 |
| 6  | 0.680525  | -2.583194 | -0.371321 |
| 6  | 1.998204  | -3.196964 | -0.287846 |
| 6  | 2.898757  | -2.165316 | -0.289961 |
| 6  | -0.511011 | -3.291576 | -0.468520 |
| 6  | 0.316664  | 0.855469  | 2.278247  |
| 8  | -0.067116 | 2.115444  | 2.594464  |
| 8  | 1.467053  | 0.483745  | 2.434362  |
| 1  | -0.445342 | -4.374820 | -0.444064 |
| 1  | -5.152042 | -0.159683 | -1.240908 |
| 1  | -0.998024 | 4.625317  | -0.680673 |
| 1  | 3.748041  | 0.402024  | -0.464469 |
| 1  | 1.172647  | -1.582921 | 2.665533  |
| 1  | 1.036034  | -3.809778 | 3.698386  |
| 1  | -3.237688 | -3.699870 | 3.314492  |
| 1  | -1.199973 | -4.886997 | 4.039469  |
| 1  | -5.277589 | -1.146857 | 1.916407  |
| 1  | -4.667726 | -2.814909 | 1.789301  |
| 1  | -4.801470 | -2.032072 | 3.398855  |
| 6  | -0.655132 | -1.411546 | -3.605357 |
| 1  | -1.686851 | -1.759497 | -3.482474 |
| 1  | -0.446213 | -1.338625 | -4.680123 |
| 1  | 0.015981  | -2.166918 | -3.180206 |
| 16 | -0.382558 | 0.242067  | -2.858635 |
| 6  | 1.651275  | 5.254555  | -0.739554 |
| 1  | 2.689286  | 5.601778  | -0.779065 |
| 1  | 1.150302  | 5.611107  | -1.649582 |
| 1  | 1.168943  | 5.762019  | 0.107283  |
| 6  | 2.251674  | -4.672894 | -0.208838 |
| 1  | 1.713964  | -5.127452 | 0.633950  |
| 1  | 1.920025  | -5.194122 | -1.117495 |
| 1  | 3.316795  | -4.893830 | -0.078875 |
| 6  | -3.017514 | -5.021188 | -0.946031 |
| 1  | -2.468174 | -5.425124 | -1.807932 |
| 1  | -2.569155 | -5.461383 | -0.045990 |
| 1  | -4.045915 | -5.389962 | -1.020058 |
| 6  | -5.808860 | 2.471500  | -1.255780 |
| 1  | -6.083439 | 2.489823  | -2.320813 |
| 1  | -6.319272 | 1.611935  | -0.807247 |
| 1  | -6.219872 | 3.380747  | -0.802270 |
| 6  | -3.676201 | 4.879207  | -0.925638 |
| 6  | -4.671355 | 5.545185  | -1.538238 |
| 1  | -2.955343 | 5.475864  | -0.365191 |
| 1  | -4.752667 | 6.625726  | -1.451257 |
| 1  | -5.411583 | 5.051629  | -2.159799 |
| 6  | -5.346100 | -2.973136 | -1.537680 |
| 6  | -6.200520 | -2.294506 | -2.323014 |

|   |           |           |           |
|---|-----------|-----------|-----------|
| 1 | -5.693368 | -3.933681 | -1.150754 |
| 1 | -7.196152 | -2.682156 | -2.523932 |
| 1 | -5.932185 | -1.362740 | -2.810091 |
| 6 | 4.396309  | -2.241146 | -0.194120 |
| 6 | 5.118037  | -2.063989 | -1.565886 |
| 1 | 4.691098  | -3.209926 | 0.227311  |
| 1 | 4.775193  | -1.470983 | 0.487396  |
| 1 | 4.748943  | -2.810425 | -2.273587 |
| 1 | 4.908497  | -1.066599 | -1.958844 |
| 6 | 4.078439  | 3.070076  | -0.713650 |
| 6 | 4.880599  | 2.741589  | 0.583317  |
| 1 | 4.280169  | 4.108598  | -0.999151 |
| 1 | 4.464092  | 2.450537  | -1.529739 |
| 1 | 5.118053  | 3.643627  | 1.153485  |
| 1 | 4.263130  | 2.105671  | 1.231301  |
| 6 | 6.607909  | -2.214336 | -1.403863 |
| 8 | 7.393582  | -1.363250 | -1.013099 |
| 8 | 7.042838  | -3.463726 | -1.690039 |
| 1 | 8.001491  | -3.460666 | -1.503818 |
| 6 | 6.176889  | 1.979341  | 0.371597  |
| 8 | 7.224829  | 2.191774  | 0.946539  |
| 8 | 6.009120  | 0.971106  | -0.511618 |
| 1 | 6.793809  | 0.377557  | -0.548251 |
| 6 | 0.976463  | 2.999199  | 3.040617  |
| 6 | 0.317382  | 4.320780  | 3.396484  |
| 1 | 1.707341  | 3.117595  | 2.235771  |
| 1 | 1.486415  | 2.550272  | 3.900104  |
| 1 | 1.074292  | 5.038978  | 3.733443  |
| 1 | -0.196594 | 4.736431  | 2.524089  |
| 1 | -0.417630 | 4.190094  | 4.198272  |

---

ICSSC<sub>FE(cys)</sub>

---

Number of imaginary frequencies: 0    Electronic energy:    HF=-3157.9878355  
Zero-point correction=                    0.853058 (Hartree/Particle)  
Thermal correction to Energy=            0.916866  
Thermal correction to Enthalpy=         0.917810  
Thermal correction to Gibbs Free Energy= 0.744867  
Sum of electronic and zero-point Energies= -3157.134778  
Sum of electronic and thermal Energies= -3157.070969  
Sum of electronic and thermal Enthalpies= -3157.070025  
Sum of electronic and thermal Free Energies= -3157.242968

---

Cartesian Coordinates

---

|   |           |           |          |
|---|-----------|-----------|----------|
| 6 | -0.449260 | -3.323849 | 3.958499 |
| 6 | 0.705476  | -2.628000 | 3.613153 |
| 6 | 0.628665  | -1.555539 | 2.719766 |
| 6 | -0.591110 | -1.160085 | 2.153890 |
| 6 | -1.759641 | -1.854468 | 2.544965 |

|    |           |           |           |
|----|-----------|-----------|-----------|
| 6  | -1.683933 | -2.936327 | 3.428480  |
| 6  | -0.643963 | -0.011458 | 1.207332  |
| 7  | -6.837001 | 0.537174  | 1.892212  |
| 7  | -6.694932 | 1.376566  | 2.596871  |
| 8  | -2.931081 | -1.376193 | 2.029573  |
| 6  | -4.117005 | -2.109544 | 2.251072  |
| 26 | -0.392349 | -0.053503 | -0.606763 |
| 7  | -2.031398 | 1.088889  | -0.986522 |
| 6  | -2.108553 | 2.442772  | -1.070363 |
| 6  | -3.484209 | 2.865186  | -1.335171 |
| 6  | -4.229502 | 1.707119  | -1.397052 |
| 6  | -3.298357 | 0.613156  | -1.192713 |
| 6  | -1.024418 | 3.311539  | -0.952868 |
| 6  | 0.294367  | 2.930556  | -0.739157 |
| 7  | 0.721763  | 1.645161  | -0.574969 |
| 6  | 2.074541  | 1.708106  | -0.420657 |
| 6  | 2.534401  | 3.094328  | -0.485989 |
| 6  | 1.419484  | 3.858067  | -0.681853 |
| 6  | -3.658736 | -0.729036 | -1.255595 |
| 6  | -2.807252 | -1.824528 | -1.144972 |
| 7  | -1.479540 | -1.755721 | -0.842559 |
| 6  | -1.033978 | -3.044857 | -0.736516 |
| 6  | -2.115859 | -3.978871 | -0.963098 |
| 6  | -3.230646 | -3.222659 | -1.256088 |
| 6  | 2.918796  | 0.619306  | -0.236856 |
| 6  | 2.546330  | -0.722452 | -0.234215 |
| 7  | 1.279804  | -1.192156 | -0.409595 |
| 6  | 1.359479  | -2.555751 | -0.347794 |
| 6  | 2.733032  | -2.976948 | -0.115176 |
| 6  | 3.477225  | -1.829509 | -0.038196 |
| 6  | 0.283779  | -3.422696 | -0.486021 |
| 6  | -0.704809 | 1.266400  | 1.974841  |
| 8  | -1.936152 | 1.820389  | 2.025298  |
| 8  | 0.268946  | 1.754300  | 2.523634  |
| 1  | 0.489196  | -4.486009 | -0.414594 |
| 1  | -4.705875 | -0.946646 | -1.422802 |
| 1  | -1.214680 | 4.371821  | -1.079844 |
| 1  | 3.971795  | 0.832907  | -0.106880 |
| 1  | 1.524456  | -1.011668 | 2.441965  |
| 1  | 1.668535  | -2.914783 | 4.028028  |
| 1  | -2.582444 | -3.471651 | 3.715702  |
| 1  | -0.403711 | -4.165448 | 4.646146  |
| 1  | -4.895347 | -1.594211 | 1.685945  |
| 1  | -4.027912 | -3.139646 | 1.881441  |
| 1  | -4.392156 | -2.129847 | 3.316544  |
| 6  | 0.264231  | -1.670122 | -3.667183 |
| 1  | -0.606332 | -2.316501 | -3.506482 |
| 1  | 0.448143  | -1.609763 | -4.747017 |
| 1  | 1.133332  | -2.146937 | -3.198955 |
| 16 | -0.012365 | 0.024088  | -3.019564 |

|   |           |           |           |
|---|-----------|-----------|-----------|
| 6 | 1.309933  | 5.345560  | -0.836497 |
| 1 | 2.290035  | 5.829129  | -0.767316 |
| 1 | 0.873167  | 5.622781  | -1.805320 |
| 1 | 0.671727  | 5.788907  | -0.059877 |
| 6 | 3.179899  | -4.402329 | 0.018659  |
| 1 | 2.630903  | -4.923523 | 0.814013  |
| 1 | 3.015105  | -4.969517 | -0.907643 |
| 1 | 4.247124  | -4.470776 | 0.255677  |
| 6 | -1.980554 | -5.472491 | -0.947989 |
| 1 | -1.384740 | -5.836442 | -1.796750 |
| 1 | -1.483023 | -5.822598 | -0.034450 |
| 1 | -2.955888 | -5.966742 | -1.005379 |
| 6 | -5.706748 | 1.565062  | -1.604748 |
| 1 | -5.974046 | 1.488722  | -2.669120 |
| 1 | -6.100456 | 0.671200  | -1.108771 |
| 1 | -6.240276 | 2.434126  | -1.202576 |
| 6 | -3.905428 | 4.252808  | -1.462981 |
| 6 | -4.991129 | 4.736064  | -2.094022 |
| 1 | -3.251150 | 4.982472  | -0.984681 |
| 1 | -5.201632 | 5.802460  | -2.097040 |
| 1 | -5.680450 | 4.104521  | -2.644816 |
| 6 | -4.541538 | -3.752023 | -1.617360 |
| 6 | -5.454985 | -3.222357 | -2.448805 |
| 1 | -4.781473 | -4.721221 | -1.174896 |
| 1 | -6.397937 | -3.730725 | -2.634003 |
| 1 | -5.285431 | -2.295535 | -2.987231 |
| 6 | 4.949860  | -1.695289 | 0.230138  |
| 6 | 5.794053  | -1.400805 | -1.047522 |
| 1 | 5.326171  | -2.618558 | 0.687179  |
| 1 | 5.136589  | -0.888120 | 0.947614  |
| 1 | 5.616140  | -2.178241 | -1.794522 |
| 1 | 5.496381  | -0.434566 | -1.461421 |
| 6 | 3.975916  | 3.516063  | -0.410660 |
| 6 | 4.632483  | 3.340595  | 0.994289  |
| 1 | 4.072998  | 4.564171  | -0.714717 |
| 1 | 4.550132  | 2.934645  | -1.139670 |
| 1 | 4.667299  | 4.283555  | 1.545449  |
| 1 | 4.024636  | 2.644961  | 1.586579  |
| 6 | 7.262044  | -1.347678 | -0.711937 |
| 8 | 7.863756  | -0.415200 | -0.200278 |
| 8 | 7.904763  | -2.506528 | -0.987721 |
| 1 | 8.825893  | -2.377213 | -0.690079 |
| 6 | 6.037524  | 2.766119  | 0.973183  |
| 8 | 6.985182  | 3.174877  | 1.611980  |
| 8 | 6.101481  | 1.680377  | 0.170055  |
| 1 | 6.972227  | 1.226191  | 0.225919  |
| 6 | -2.023331 | 3.081541  | 2.714037  |
| 6 | -3.482829 | 3.501188  | 2.708956  |
| 1 | -1.390986 | 3.809273  | 2.194242  |
| 1 | -1.632151 | 2.966599  | 3.731030  |

|   |           |          |          |
|---|-----------|----------|----------|
| 1 | -3.597877 | 4.467723 | 3.214678 |
| 1 | -3.852191 | 3.596055 | 1.683187 |
| 1 | -4.103399 | 2.763573 | 3.228725 |

-----  
**1CSS<sup>†</sup>TS(C-P)<sub>FE(cys)</sub>**  
 -----

Number of imaginary frequencies: 1    Electronic energy:    HF=-3048.4332305  
 Zero-point correction=                    0.843437 (Hartree/Particle)  
 Thermal correction to Energy=            0.901734  
 Thermal correction to Enthalpy=         0.902678  
 Thermal correction to Gibbs Free Energy= 0.749035  
 Sum of electronic and zero-point Energies= -3047.589793  
 Sum of electronic and thermal Energies= -3047.531496  
 Sum of electronic and thermal Enthalpies= -3047.530552  
 Sum of electronic and thermal Free Energies= -3047.684195

.....  
 Cartesian Coordinates  
 .....

|    |           |           |           |
|----|-----------|-----------|-----------|
| 6  | -1.938763 | 3.926205  | 3.301445  |
| 6  | -2.945945 | 3.112027  | 2.785532  |
| 6  | -2.644278 | 1.863151  | 2.231777  |
| 6  | -1.323461 | 1.399815  | 2.186110  |
| 6  | -0.335859 | 2.238519  | 2.734800  |
| 6  | -0.612365 | 3.481647  | 3.282433  |
| 6  | -0.918817 | 0.082591  | 1.628826  |
| 8  | 0.979169  | 1.791091  | 2.682877  |
| 6  | 1.071628  | 0.427423  | 2.662150  |
| 26 | -0.727132 | -0.235785 | -0.538944 |
| 7  | -2.430941 | 0.822431  | -0.808499 |
| 6  | -2.553283 | 2.167897  | -0.972206 |
| 6  | -3.957274 | 2.543676  | -1.140942 |
| 6  | -4.675217 | 1.369001  | -1.057718 |
| 6  | -3.701711 | 0.310694  | -0.862363 |
| 6  | -1.485234 | 3.065400  | -0.980174 |
| 6  | -0.143267 | 2.739230  | -0.837462 |
| 7  | 0.349989  | 1.472138  | -0.672423 |
| 6  | 1.710598  | 1.596524  | -0.645382 |
| 6  | 2.104910  | 2.998312  | -0.765125 |
| 6  | 0.941508  | 3.710301  | -0.882236 |
| 6  | -4.027537 | -1.039965 | -0.769584 |
| 6  | -3.138147 | -2.100511 | -0.640163 |
| 7  | -1.789623 | -1.969731 | -0.463159 |
| 6  | -1.292931 | -3.237829 | -0.331914 |
| 6  | -2.358977 | -4.217134 | -0.398220 |
| 6  | -3.521662 | -3.513331 | -0.619896 |
| 6  | 2.602101  | 0.534449  | -0.512698 |
| 6  | 2.267235  | -0.809198 | -0.354267 |
| 7  | 0.993692  | -1.301180 | -0.317654 |
| 6  | 1.115124  | -2.660711 | -0.192637 |
| 6  | 2.515543  | -3.045927 | -0.103533 |

|    |           |           |           |
|----|-----------|-----------|-----------|
| 6  | 3.238494  | -1.886484 | -0.195290 |
| 6  | 0.057031  | -3.559739 | -0.186989 |
| 6  | -1.495870 | -1.072863 | 2.353665  |
| 8  | -0.575172 | -2.010363 | 2.710111  |
| 8  | -2.683154 | -1.189908 | 2.600918  |
| 1  | 0.304700  | -4.613698 | -0.101255 |
| 1  | -5.078715 | -1.295011 | -0.815012 |
| 1  | -1.718772 | 4.114091  | -1.129648 |
| 1  | 3.656736  | 0.773203  | -0.549469 |
| 1  | -3.429831 | 1.236935  | 1.829206  |
| 1  | -3.980225 | 3.445351  | 2.805087  |
| 1  | 0.199457  | 4.074436  | 3.692743  |
| 1  | -2.176497 | 4.896963  | 3.729046  |
| 1  | 0.770295  | -0.090828 | 3.572919  |
| 1  | 0.279193  | -0.005017 | 1.575530  |
| 1  | 2.003967  | 0.096998  | 2.207691  |
| 6  | -0.468994 | 0.937862  | -3.783302 |
| 1  | 0.450338  | 1.469783  | -3.512446 |
| 1  | -0.439339 | 0.731605  | -4.860680 |
| 1  | -1.318936 | 1.601370  | -3.587990 |
| 16 | -0.631497 | -0.658917 | -2.892091 |
| 6  | 0.745931  | 5.190542  | -1.026669 |
| 1  | 1.699768  | 5.728256  | -1.037104 |
| 1  | 0.218586  | 5.441633  | -1.956877 |
| 1  | 0.148027  | 5.599243  | -0.200906 |
| 6  | 3.013016  | -4.452730 | 0.050590  |
| 1  | 2.761375  | -5.069422 | -0.823083 |
| 1  | 4.101590  | -4.485694 | 0.168952  |
| 1  | 2.573498  | -4.949863 | 0.926028  |
| 6  | -2.173391 | -5.704251 | -0.329815 |
| 1  | -1.688247 | -6.095894 | -1.235080 |
| 1  | -1.544639 | -5.998668 | 0.520668  |
| 1  | -3.131528 | -6.224742 | -0.228507 |
| 6  | -6.161549 | 1.185216  | -1.114418 |
| 1  | -6.524102 | 1.029875  | -2.141353 |
| 1  | -6.483772 | 0.319851  | -0.525186 |
| 1  | -6.677122 | 2.069937  | -0.723128 |
| 6  | -4.427758 | 3.910922  | -1.305556 |
| 6  | -5.570792 | 4.330139  | -1.878175 |
| 1  | -3.764538 | 4.680377  | -0.908769 |
| 1  | -5.817080 | 5.388290  | -1.916277 |
| 1  | -6.276939 | 3.650896  | -2.344897 |
| 6  | -4.844474 | -4.099438 | -0.811088 |
| 6  | -5.837815 | -3.664912 | -1.604365 |
| 1  | -5.020962 | -5.024944 | -0.258773 |
| 1  | -6.781973 | -4.201419 | -1.657296 |
| 1  | -5.735650 | -2.790295 | -2.238770 |
| 6  | 4.726434  | -1.709134 | -0.107005 |
| 6  | 5.402062  | -1.462057 | -1.488784 |
| 1  | 5.179692  | -2.602468 | 0.340185  |



|   |           |           |           |
|---|-----------|-----------|-----------|
| 1 | 4.975212  | -0.870605 | 0.554239  |
| 1 | 5.215962  | -2.304457 | -2.158753 |
| 1 | 4.978214  | -0.560732 | -1.942204 |
| 6 | 3.509505  | 3.538377  | -0.758784 |
| 6 | 4.274705  | 3.413248  | 0.595468  |
| 1 | 3.468041  | 4.600577  | -1.021867 |
| 1 | 4.114218  | 3.063331  | -1.539659 |
| 1 | 4.921922  | 4.293696  | 0.716124  |
| 1 | 3.583203  | 3.390985  | 1.440737  |
| 6 | 6.881700  | -1.252670 | -1.318633 |
| 8 | 7.415501  | -0.295951 | -0.774993 |
| 8 | 7.628416  | -2.274847 | -1.790409 |
| 1 | 8.556218  | -2.042894 | -1.591434 |
| 6 | 5.190358  | 2.209012  | 0.719625  |
| 8 | 5.266084  | 1.483588  | 1.693337  |
| 8 | 5.950629  | 2.042550  | -0.382530 |
| 1 | 6.489840  | 1.218445  | -0.296114 |
| 6 | -1.109627 | -3.211346 | 3.294927  |
| 6 | 0.067985  | -4.080530 | 3.699984  |
| 1 | -1.745091 | -3.707876 | 2.555275  |
| 1 | -1.736883 | -2.946227 | 4.152987  |
| 1 | -0.290683 | -5.015327 | 4.147232  |
| 1 | 0.681372  | -4.322381 | 2.826542  |
| 1 | 0.700618  | -3.567962 | 4.433372  |

---

$10SS A_{FE(cys)}$

---

Number of imaginary frequencies: 0    Electronic energy:    HF=-2396.4796783  
Zero-point correction=                    0.634414 (Hartree/Particle)  
Thermal correction to Energy=            0.679736  
Thermal correction to Enthalpy=         0.680680  
Thermal correction to Gibbs Free Energy=    0.550487  
Sum of electronic and zero-point Energies=    -2395.845264  
Sum of electronic and thermal Energies=    -2395.799942  
Sum of electronic and thermal Enthalpies=   -2395.798998  
Sum of electronic and thermal Free Energies=   -2395.929191

.....  
Cartesian Coordinates

.....  

|    |           |           |           |
|----|-----------|-----------|-----------|
| 26 | 1.046559  | -0.070834 | -0.014089 |
| 7  | 2.405117  | -1.524452 | -0.383912 |
| 6  | 2.153020  | -2.861318 | -0.570873 |
| 6  | 3.383112  | -3.604053 | -0.734873 |
| 6  | 4.406489  | -2.684087 | -0.677240 |
| 6  | 3.768683  | -1.390551 | -0.429484 |
| 6  | 0.886021  | -3.437914 | -0.614472 |
| 6  | -0.319231 | -2.760674 | -0.502382 |
| 7  | -0.444874 | -1.405405 | -0.317660 |
| 6  | -1.791937 | -1.162585 | -0.270549 |
| 6  | -2.547536 | -2.399871 | -0.415633 |

|    |           |           |           |
|----|-----------|-----------|-----------|
| 6  | -1.623863 | -3.399291 | -0.564041 |
| 6  | -2.367495 | 0.096619  | -0.136499 |
| 6  | -1.678594 | 1.299541  | -0.036147 |
| 7  | -0.315018 | 1.420993  | -0.011226 |
| 6  | -0.066294 | 2.763293  | 0.122426  |
| 6  | -1.308769 | 3.520544  | 0.171549  |
| 6  | -2.319487 | 2.605133  | 0.070028  |
| 6  | 1.193652  | 3.338404  | 0.205037  |
| 6  | 2.406292  | 2.659104  | 0.134146  |
| 6  | 3.717517  | 3.294101  | 0.235975  |
| 6  | 4.640994  | 2.274353  | 0.135389  |
| 6  | 3.879931  | 1.052778  | -0.026639 |
| 7  | 2.529684  | 1.307244  | -0.021416 |
| 6  | 4.451879  | -0.202241 | -0.207268 |
| 1  | 0.838245  | -4.513302 | -0.757049 |
| 1  | 5.532048  | -0.263232 | -0.168500 |
| 1  | 1.232015  | 4.413579  | 0.345234  |
| 1  | -3.452315 | 0.145525  | -0.124076 |
| 16 | 1.133827  | -0.218675 | 2.359200  |
| 6  | 0.596156  | -1.916161 | 2.811259  |
| 1  | 1.214389  | -2.681923 | 2.329485  |
| 1  | 0.696487  | -2.032945 | 3.897828  |
| 1  | -0.450964 | -2.102230 | 2.544815  |
| 6  | -1.402200 | 5.011602  | 0.305231  |
| 1  | -0.861337 | 5.372228  | 1.190047  |
| 1  | -0.971747 | 5.529961  | -0.563130 |
| 1  | -2.442194 | 5.341770  | 0.400598  |
| 6  | -1.854219 | -4.869916 | -0.750347 |
| 1  | -1.348317 | -5.249999 | -1.647974 |
| 1  | -1.473918 | -5.454265 | 0.099021  |
| 1  | -2.920202 | -5.099630 | -0.853624 |
| 6  | 3.471402  | -5.080711 | -0.982104 |
| 1  | 2.906297  | -5.649823 | -0.232526 |
| 1  | 3.063927  | -5.356472 | -1.965199 |
| 1  | 4.507451  | -5.433134 | -0.953263 |
| 6  | 6.135867  | 2.378684  | 0.130364  |
| 1  | 6.559764  | 2.316928  | 1.143339  |
| 1  | 6.595931  | 1.577370  | -0.458009 |
| 1  | 6.457904  | 3.336504  | -0.294763 |
| 6  | 5.823762  | -2.981327 | -0.853512 |
| 6  | 6.778092  | -2.206641 | -1.397039 |
| 1  | 6.125899  | -3.978231 | -0.526461 |
| 1  | 7.804600  | -2.557146 | -1.468928 |
| 1  | 6.569201  | -1.222131 | -1.803398 |
| 6  | 3.928431  | 4.728129  | 0.366999  |
| 6  | 4.994453  | 5.364403  | 0.885280  |
| 1  | 3.115612  | 5.353255  | -0.004628 |
| 1  | 5.036647  | 6.450435  | 0.905751  |
| 1  | 5.834651  | 4.838186  | 1.326577  |
| 6  | -4.044583 | -2.516279 | -0.360503 |

|   |           |           |           |
|---|-----------|-----------|-----------|
| 6 | -4.582874 | -2.488413 | 1.081138  |
| 1 | -4.375001 | -3.444787 | -0.839371 |
| 1 | -4.520381 | -1.707229 | -0.928116 |
| 1 | -4.140615 | -3.297957 | 1.676150  |
| 1 | -4.286608 | -1.564432 | 1.592820  |
| 6 | -3.800541 | 2.853896  | 0.021143  |
| 6 | -4.354522 | 2.822329  | -1.414455 |
| 1 | -4.040523 | 3.825219  | 0.467218  |
| 1 | -4.340211 | 2.112566  | 0.623008  |
| 1 | -3.844109 | 3.565025  | -2.041899 |
| 1 | -4.152371 | 1.855812  | -1.892043 |
| 6 | -6.085978 | -2.615831 | 1.160012  |
| 8 | -6.851452 | -2.751374 | 0.228447  |
| 8 | -6.528871 | -2.566280 | 2.445883  |
| 1 | -7.499548 | -2.647917 | 2.389471  |
| 6 | -5.839263 | 3.090265  | -1.492760 |
| 8 | -6.576035 | 3.367489  | -0.570235 |
| 8 | -6.301060 | 2.993314  | -2.770407 |
| 1 | -7.257717 | 3.177169  | -2.714259 |

---

**10SSB<sub>FE(cys)</sub>**

---

Number of imaginary frequencies: 0    Electronic energy:    HF=-3158.0010275  
Zero-point correction=                    0.857468 (Hartree/Particle)  
Thermal correction to Energy=            0.919478  
Thermal correction to Enthalpy=         0.920423  
Thermal correction to Gibbs Free Energy= 0.753189  
Sum of electronic and zero-point Energies= -3157.143560  
Sum of electronic and thermal Energies= -3157.081549  
Sum of electronic and thermal Enthalpies= -3157.080605  
Sum of electronic and thermal Free Energies= -3157.247839

.....  
Cartesian Coordinates

|    |           |           |           |
|----|-----------|-----------|-----------|
| 6  | -4.997299 | 5.224751  | -0.691243 |
| 6  | -3.808803 | 5.862274  | -1.039352 |
| 6  | -2.785726 | 5.138068  | -1.653492 |
| 6  | -2.923383 | 3.768776  | -1.921032 |
| 6  | -4.135827 | 3.130576  | -1.553150 |
| 6  | -5.163384 | 3.861388  | -0.948577 |
| 6  | -1.815666 | 3.009053  | -2.531655 |
| 7  | -2.075101 | 1.986723  | -3.322691 |
| 7  | -2.277159 | 1.119139  | -4.028042 |
| 8  | -4.212734 | 1.800283  | -1.828497 |
| 6  | -5.283453 | 1.037751  | -1.287819 |
| 26 | -0.248941 | -1.336464 | 0.689116  |
| 7  | -1.394980 | -2.871374 | 0.068568  |
| 6  | -1.002998 | -3.976954 | -0.633801 |
| 6  | -2.129098 | -4.880615 | -0.857585 |
| 6  | -3.216778 | -4.286750 | -0.253882 |

|    |           |           |           |
|----|-----------|-----------|-----------|
| 6  | -2.735122 | -3.046022 | 0.319675  |
| 6  | 0.304233  | -4.237521 | -1.032124 |
| 6  | 1.400904  | -3.420457 | -0.796237 |
| 7  | 1.352753  | -2.199927 | -0.173150 |
| 6  | 2.649793  | -1.760154 | -0.121191 |
| 6  | 3.555978  | -2.734892 | -0.719620 |
| 6  | 2.767363  | -3.765525 | -1.157098 |
| 6  | -3.536071 | -2.155679 | 1.027277  |
| 6  | -3.146588 | -0.910805 | 1.506627  |
| 7  | -1.902148 | -0.368386 | 1.315437  |
| 6  | -1.991853 | 0.936602  | 1.736131  |
| 6  | -3.317607 | 1.233975  | 2.228289  |
| 6  | -4.042432 | 0.063010  | 2.133157  |
| 6  | 3.038295  | -0.521700 | 0.372075  |
| 6  | 2.179367  | 0.479799  | 0.813989  |
| 7  | 0.827461  | 0.337682  | 0.970738  |
| 6  | 0.368938  | 1.571418  | 1.371695  |
| 6  | 1.455878  | 2.534572  | 1.438868  |
| 6  | 2.593388  | 1.847374  | 1.106128  |
| 6  | -0.942768 | 1.851988  | 1.723285  |
| 6  | -0.385642 | 3.278073  | -2.297523 |
| 8  | 0.387062  | 2.351295  | -2.897710 |
| 8  | 0.043322  | 4.221054  | -1.653366 |
| 1  | -1.165518 | 2.865115  | 2.042541  |
| 1  | -4.574458 | -2.429653 | 1.165316  |
| 1  | 0.492685  | -5.177867 | -1.539458 |
| 1  | 4.096525  | -0.293130 | 0.354916  |
| 1  | -1.850845 | 5.621550  | -1.907338 |
| 1  | -3.671082 | 6.920791  | -0.836571 |
| 1  | -6.086189 | 3.367195  | -0.666808 |
| 1  | -5.801983 | 5.779068  | -0.214726 |
| 1  | -5.059168 | -0.000696 | -1.534921 |
| 1  | -5.329789 | 1.142256  | -0.198871 |
| 1  | -6.244544 | 1.324867  | -1.736544 |
| 6  | -0.251899 | -1.142666 | 4.036852  |
| 1  | -1.340061 | -1.021819 | 4.080232  |
| 1  | 0.087570  | -1.533820 | 5.004242  |
| 1  | 0.200673  | -0.156045 | 3.889514  |
| 16 | 0.260775  | -2.327364 | 2.730179  |
| 6  | 3.166025  | -5.032162 | -1.855153 |
| 1  | 4.250314  | -5.095666 | -1.994236 |
| 1  | 2.854678  | -5.921048 | -1.290436 |
| 1  | 2.705504  | -5.110353 | -2.849777 |
| 6  | 1.288930  | 3.989697  | 1.760619  |
| 1  | 0.693624  | 4.492845  | 0.988082  |
| 1  | 0.778430  | 4.138241  | 2.721360  |
| 1  | 2.254352  | 4.503457  | 1.822545  |
| 6  | -3.748575 | 2.559248  | 2.783962  |
| 1  | -3.161537 | 2.835802  | 3.670252  |
| 1  | -3.622027 | 3.365444  | 2.049654  |

|   |           |           |           |
|---|-----------|-----------|-----------|
| 1 | -4.800775 | 2.548718  | 3.085732  |
| 6 | -4.635386 | -4.769332 | -0.222246 |
| 1 | -4.838855 | -5.410256 | 0.648393  |
| 1 | -5.345334 | -3.935957 | -0.179829 |
| 1 | -4.864367 | -5.361115 | -1.116116 |
| 6 | -2.048711 | -6.119492 | -1.617295 |
| 6 | -2.843380 | -7.200974 | -1.523753 |
| 1 | -1.242119 | -6.162873 | -2.350256 |
| 1 | -2.689515 | -8.060857 | -2.170758 |
| 1 | -3.643474 | -7.279753 | -0.794736 |
| 6 | -5.415197 | -0.123557 | 2.587847  |
| 6 | -6.009219 | -1.252764 | 3.012713  |
| 1 | -6.015781 | 0.787884  | 2.617691  |
| 1 | -7.047453 | -1.245573 | 3.334906  |
| 1 | -5.482426 | -2.198657 | 3.084670  |
| 6 | 3.995029  | 2.374385  | 0.997339  |
| 6 | 4.900581  | 1.937885  | 2.189015  |
| 1 | 3.977677  | 3.470077  | 0.963270  |
| 1 | 4.466025  | 2.040821  | 0.065095  |
| 1 | 4.483321  | 2.302410  | 3.130484  |
| 1 | 4.946494  | 0.845505  | 2.229346  |
| 6 | 5.056815  | -2.643929 | -0.796480 |
| 6 | 5.641580  | -1.657034 | -1.853142 |
| 1 | 5.444015  | -3.641188 | -1.031175 |
| 1 | 5.476871  | -2.385982 | 0.182019  |
| 1 | 6.596617  | -2.063314 | -2.215702 |
| 1 | 4.977523  | -1.556776 | -2.714522 |
| 6 | 6.297184  | 2.463201  | 2.005681  |
| 8 | 7.115734  | 2.064030  | 1.188579  |
| 8 | 6.592085  | 3.502319  | 2.815599  |
| 1 | 7.496007  | 3.783276  | 2.574520  |
| 6 | 5.959025  | -0.263644 | -1.343991 |
| 8 | 5.657408  | 0.775442  | -1.903896 |
| 8 | 6.661337  | -0.298898 | -0.196107 |
| 1 | 6.817068  | 0.623008  | 0.130558  |
| 6 | 1.814427  | 2.431617  | -2.656845 |
| 6 | 2.448178  | 1.213479  | -3.300219 |
| 1 | 1.981982  | 2.455227  | -1.577266 |
| 1 | 2.186594  | 3.370033  | -3.083408 |
| 1 | 3.526663  | 1.212645  | -3.112286 |
| 1 | 2.029559  | 0.297905  | -2.870345 |
| 1 | 2.272825  | 1.204977  | -4.382267 |

-----  
<sup>1</sup>OSS<sup>TS(B-C)</sup>FE(cys)  
 -----

|                                          |                             |                  |
|------------------------------------------|-----------------------------|------------------|
| Number of imaginary frequencies: 1       | Electronic energy:          | HF=-3157.9482728 |
| Zero-point correction=                   | 0.854026 (Hartree/Particle) |                  |
| Thermal correction to Energy=            | 0.915286                    |                  |
| Thermal correction to Enthalpy=          | 0.916230                    |                  |
| Thermal correction to Gibbs Free Energy= | 0.756723                    |                  |

|                                              |              |
|----------------------------------------------|--------------|
| Sum of electronic and zero-point Energies=   | -3157.094247 |
| Sum of electronic and thermal Energies=      | -3157.032987 |
| Sum of electronic and thermal Enthalpies=    | -3157.032043 |
| Sum of electronic and thermal Free Energies= | -3157.191550 |

.....  
Cartesian Coordinates  
.....

|    |           |           |           |
|----|-----------|-----------|-----------|
| 6  | -1.101709 | -3.901807 | 3.525309  |
| 6  | 0.128579  | -3.271712 | 3.379222  |
| 6  | 0.198052  | -1.993409 | 2.820052  |
| 6  | -0.937409 | -1.287704 | 2.376834  |
| 6  | -2.182285 | -1.971193 | 2.515919  |
| 6  | -2.255370 | -3.243354 | 3.094578  |
| 6  | -0.850239 | 0.089872  | 1.787358  |
| 7  | -2.217754 | 0.909494  | 2.447753  |
| 7  | -2.759588 | 1.857481  | 2.096535  |
| 8  | -3.298984 | -1.333686 | 2.053758  |
| 6  | -4.572064 | -1.863938 | 2.340470  |
| 26 | -0.743312 | 0.116923  | -0.568779 |
| 7  | -2.227827 | 1.455699  | -0.717626 |
| 6  | -2.136768 | 2.818789  | -0.675500 |
| 6  | -3.454820 | 3.424768  | -0.823378 |
| 6  | -4.340891 | 2.381370  | -0.967315 |
| 6  | -3.552775 | 1.165760  | -0.911322 |
| 6  | -0.949922 | 3.540455  | -0.625140 |
| 6  | 0.322906  | 2.985787  | -0.603629 |
| 7  | 0.588383  | 1.648781  | -0.526543 |
| 6  | 1.948654  | 1.524526  | -0.587140 |
| 6  | 2.576627  | 2.836046  | -0.697827 |
| 6  | 1.558874  | 3.750871  | -0.700939 |
| 6  | -4.087447 | -0.107133 | -1.072075 |
| 6  | -3.379466 | -1.303617 | -1.033382 |
| 7  | -2.049909 | -1.412771 | -0.748489 |
| 6  | -1.776230 | -2.755578 | -0.672439 |
| 6  | -2.971540 | -3.532373 | -0.903939 |
| 6  | -3.978781 | -2.630597 | -1.175719 |
| 6  | 2.651648  | 0.330712  | -0.517267 |
| 6  | 2.097180  | -0.938890 | -0.403774 |
| 7  | 0.762839  | -1.227869 | -0.430603 |
| 6  | 0.664340  | -2.591386 | -0.356323 |
| 6  | 1.979159  | -3.192595 | -0.226568 |
| 6  | 2.878355  | -2.158768 | -0.259729 |
| 6  | -0.520236 | -3.309114 | -0.455464 |
| 6  | 0.302821  | 0.905358  | 2.258250  |
| 8  | -0.013205 | 2.209173  | 2.506053  |
| 8  | 1.455113  | 0.515732  | 2.417018  |
| 1  | -0.456360 | -4.389953 | -0.390603 |
| 1  | -5.156534 | -0.176500 | -1.224592 |
| 1  | -1.019846 | 4.621650  | -0.672324 |
| 1  | 3.731799  | 0.394094  | -0.531571 |

|    |           |           |           |
|----|-----------|-----------|-----------|
| 1  | 1.159074  | -1.509481 | 2.723028  |
| 1  | 1.043675  | -3.760251 | 3.707329  |
| 1  | -3.217249 | -3.733165 | 3.197551  |
| 1  | -1.178366 | -4.892931 | 3.967822  |
| 1  | -5.289079 | -1.140973 | 1.945768  |
| 1  | -4.735214 | -2.830640 | 1.844144  |
| 1  | -4.728682 | -1.983369 | 3.422773  |
| 6  | -0.494440 | -1.475021 | -3.581943 |
| 1  | -1.464234 | -1.958490 | -3.428659 |
| 1  | -0.310398 | -1.399457 | -4.660341 |
| 1  | 0.284631  | -2.104438 | -3.140155 |
| 16 | -0.460003 | 0.222457  | -2.895135 |
| 6  | 1.635466  | 5.245291  | -0.806296 |
| 1  | 2.672809  | 5.588316  | -0.879805 |
| 1  | 1.101767  | 5.617546  | -1.690795 |
| 1  | 1.188741  | 5.739387  | 0.067079  |
| 6  | 2.232214  | -4.661539 | -0.063456 |
| 1  | 1.695919  | -5.060707 | 0.807255  |
| 1  | 1.897097  | -5.234615 | -0.938773 |
| 1  | 3.297383  | -4.874966 | 0.075903  |
| 6  | -3.034636 | -5.030738 | -0.895602 |
| 1  | -2.459392 | -5.469030 | -1.722856 |
| 1  | -2.622420 | -5.440355 | 0.035420  |
| 1  | -4.063432 | -5.392063 | -0.992533 |
| 6  | -5.831875 | 2.442503  | -1.101361 |
| 1  | -6.157601 | 2.456934  | -2.151906 |
| 1  | -6.313309 | 1.580697  | -0.626289 |
| 1  | -6.223823 | 3.349873  | -0.628862 |
| 6  | -3.706791 | 4.858634  | -0.770349 |
| 6  | -4.710687 | 5.536167  | -1.353221 |
| 1  | -2.992237 | 5.434765  | -0.181762 |
| 1  | -4.809341 | 6.610260  | -1.218486 |
| 1  | -5.444912 | 5.057601  | -1.993810 |
| 6  | -5.350216 | -2.973443 | -1.537053 |
| 6  | -6.191605 | -2.299659 | -2.339556 |
| 1  | -5.710806 | -3.917902 | -1.124849 |
| 1  | -7.194124 | -2.673261 | -2.532037 |
| 1  | -5.906233 | -1.382884 | -2.845472 |
| 6  | 4.373484  | -2.226939 | -0.125322 |
| 6  | 5.128106  | -2.118837 | -1.486061 |
| 1  | 4.656980  | -3.172764 | 0.351458  |
| 1  | 4.733826  | -1.423385 | 0.526458  |
| 1  | 4.775975  | -2.900854 | -2.163683 |
| 1  | 4.930895  | -1.142558 | -1.934440 |
| 6  | 4.060508  | 3.055673  | -0.807888 |
| 6  | 4.850303  | 2.756101  | 0.503997  |
| 1  | 4.263324  | 4.087878  | -1.114271 |
| 1  | 4.453365  | 2.418765  | -1.606917 |
| 1  | 5.079608  | 3.671085  | 1.056125  |
| 1  | 4.228705  | 2.132444  | 1.159890  |

|   |           |           |           |
|---|-----------|-----------|-----------|
| 6 | 6.613964  | -2.261378 | -1.281201 |
| 8 | 7.394406  | -1.385553 | -0.938910 |
| 8 | 7.047337  | -3.529986 | -1.465145 |
| 1 | 8.001370  | -3.519019 | -1.256735 |
| 6 | 6.150753  | 1.995473  | 0.315816  |
| 8 | 7.199376  | 2.233741  | 0.878222  |
| 8 | 5.987068  | 0.956083  | -0.533098 |
| 1 | 6.777366  | 0.369227  | -0.551340 |
| 6 | 1.061905  | 3.044447  | 2.945608  |
| 6 | 0.460380  | 4.393961  | 3.304932  |
| 1 | 1.802739  | 3.138444  | 2.145032  |
| 1 | 1.559236  | 2.580637  | 3.805097  |
| 1 | 1.245720  | 5.081387  | 3.642620  |
| 1 | -0.040991 | 4.833303  | 2.436436  |
| 1 | -0.279591 | 4.289631  | 4.105737  |

---

<sup>10</sup>SSC<sub>FE(cys)</sub>

---

Number of imaginary frequencies: 0    Electronic energy:    HF=-3157.9938429  
Zero-point correction=                    0.851169 (Hartree/Particle)  
Thermal correction to Energy=            0.915724  
Thermal correction to Enthalpy=         0.916668  
Thermal correction to Gibbs Free Energy= 0.739810  
Sum of electronic and zero-point Energies= -3157.142674  
Sum of electronic and thermal Energies= -3157.078119  
Sum of electronic and thermal Enthalpies= -3157.077175  
Sum of electronic and thermal Free Energies= -3157.254033

.....  
Cartesian Coordinates

.....

|    |           |           |           |
|----|-----------|-----------|-----------|
| 6  | -0.281875 | -3.397592 | 3.961246  |
| 6  | 0.848998  | -2.687210 | 3.569846  |
| 6  | 0.718028  | -1.605908 | 2.694061  |
| 6  | -0.527932 | -1.207319 | 2.186309  |
| 6  | -1.668984 | -1.920806 | 2.628507  |
| 6  | -1.542892 | -3.012484 | 3.495115  |
| 6  | -0.629888 | -0.058449 | 1.251582  |
| 8  | -2.875196 | -1.453866 | 2.179404  |
| 6  | -4.042435 | -2.162067 | 2.534696  |
| 26 | -0.405643 | -0.145949 | -0.689545 |
| 7  | -1.914563 | 1.158393  | -1.054327 |
| 6  | -1.841693 | 2.512207  | -1.170604 |
| 6  | -3.150058 | 3.071596  | -1.501167 |
| 6  | -4.013734 | 1.997628  | -1.570739 |
| 6  | -3.220234 | 0.817882  | -1.288608 |
| 6  | -0.677396 | 3.263291  | -1.017237 |
| 6  | 0.584911  | 2.748016  | -0.757559 |
| 7  | 0.882383  | 1.418352  | -0.634797 |
| 6  | 2.223702  | 1.345907  | -0.401579 |
| 6  | 2.806830  | 2.682260  | -0.356731 |



|    |           |           |           |
|----|-----------|-----------|-----------|
| 6  | 1.782235  | 3.557792  | -0.587253 |
| 6  | -3.738077 | -0.474286 | -1.265450 |
| 6  | -3.031781 | -1.647212 | -1.030111 |
| 7  | -1.684512 | -1.721731 | -0.827537 |
| 6  | -1.369906 | -3.048774 | -0.762988 |
| 6  | -2.555839 | -3.862629 | -0.917079 |
| 6  | -3.614002 | -2.991308 | -1.062004 |
| 6  | 2.955880  | 0.169723  | -0.268240 |
| 6  | 2.451080  | -1.125490 | -0.340696 |
| 7  | 1.135021  | -1.452683 | -0.473914 |
| 6  | 1.075412  | -2.818134 | -0.478113 |
| 6  | 2.408032  | -3.388302 | -0.346543 |
| 6  | 3.270945  | -2.330973 | -0.262099 |
| 6  | -0.085631 | -3.565374 | -0.600637 |
| 6  | -0.584326 | 1.236376  | 1.967235  |
| 8  | -1.762888 | 1.916342  | 1.949115  |
| 8  | 0.404637  | 1.678084  | 2.534499  |
| 1  | 0.014419  | -4.645646 | -0.581168 |
| 1  | -4.786936 | -0.582451 | -1.507785 |
| 1  | -0.753809 | 4.338544  | -1.136422 |
| 1  | 4.026224  | 0.272204  | -0.120183 |
| 1  | 1.594839  | -1.048623 | 2.383969  |
| 1  | 1.833335  | -2.970165 | 3.935090  |
| 1  | -2.421114 | -3.560003 | 3.819611  |
| 1  | -0.197731 | -4.247618 | 4.635083  |
| 1  | -4.869417 | -1.639902 | 2.050879  |
| 1  | -4.016895 | -3.197954 | 2.170804  |
| 1  | -4.202986 | -2.166284 | 3.623714  |
| 16 | -0.059951 | -0.419466 | -3.057321 |
| 6  | -0.046776 | 1.218356  | -3.880058 |
| 1  | -1.002651 | 1.740575  | -3.761484 |
| 1  | 0.746524  | 1.862426  | -3.484968 |
| 1  | 0.132431  | 1.068749  | -4.951551 |
| 6  | 1.821462  | 5.055918  | -0.646923 |
| 1  | 1.388541  | 5.436426  | -1.581441 |
| 1  | 1.255046  | 5.512482  | 0.176536  |
| 1  | 2.848032  | 5.432060  | -0.584902 |
| 6  | 2.713424  | -4.856248 | -0.320639 |
| 1  | 2.150140  | -5.370239 | 0.469171  |
| 1  | 2.452634  | -5.344159 | -1.269770 |
| 1  | 3.777363  | -5.041368 | -0.138599 |
| 6  | -5.487992 | 2.013704  | -1.838867 |
| 1  | -5.716831 | 1.940253  | -2.912133 |
| 1  | -5.998177 | 1.180658  | -1.344124 |
| 1  | -5.937875 | 2.945836  | -1.477913 |
| 6  | -2.577240 | -5.361560 | -0.874803 |
| 1  | -1.872101 | -5.794844 | -1.595838 |
| 1  | -2.295394 | -5.742945 | 0.116413  |
| 1  | -3.571075 | -5.758906 | -1.103852 |
| 6  | -5.010743 | -3.382344 | -1.217403 |

|   |           |           |           |
|---|-----------|-----------|-----------|
| 6 | -6.120997 | -2.722702 | -0.843385 |
| 1 | -5.156577 | -4.362799 | -1.674472 |
| 1 | -7.104358 | -3.148035 | -1.027415 |
| 1 | -6.094837 | -1.763786 | -0.336234 |
| 6 | -3.414573 | 4.492575  | -1.676934 |
| 6 | -4.410042 | 5.070263  | -2.373538 |
| 1 | -2.712163 | 5.161389  | -1.178481 |
| 1 | -4.507093 | 6.152295  | -2.407884 |
| 1 | -5.134411 | 4.500289  | -2.946124 |
| 6 | 4.770085  | -2.356853 | -0.168979 |
| 6 | 5.446227  | -2.110766 | -1.529637 |
| 1 | 5.112067  | -3.320919 | 0.223019  |
| 1 | 5.130288  | -1.605121 | 0.544063  |
| 1 | 5.116067  | -2.855248 | -2.265861 |
| 1 | 5.145220  | -1.143230 | -1.949152 |
| 6 | 4.243646  | 2.991851  | -0.048135 |
| 6 | 4.544713  | 2.907338  | 1.459102  |
| 1 | 4.504335  | 3.995075  | -0.402460 |
| 1 | 4.915033  | 2.307998  | -0.581726 |
| 1 | 3.890322  | 3.584928  | 2.022691  |
| 1 | 4.318180  | 1.908666  | 1.851055  |
| 6 | 6.954594  | -2.156528 | -1.462970 |
| 8 | 7.629093  | -2.413622 | -0.487841 |
| 8 | 7.520842  | -1.873624 | -2.667784 |
| 1 | 8.483986  | -1.924793 | -2.520075 |
| 6 | 5.976553  | 3.246019  | 1.799052  |
| 8 | 6.835164  | 3.620696  | 1.027663  |
| 8 | 6.230219  | 3.091341  | 3.127103  |
| 1 | 7.169338  | 3.330459  | 3.240810  |
| 6 | -1.746554 | 3.201104  | 2.589369  |
| 6 | -3.158588 | 3.759193  | 2.530924  |
| 1 | -1.035109 | 3.850635  | 2.066648  |
| 1 | -1.393844 | 3.090537  | 3.621151  |
| 1 | -3.193881 | 4.748261  | 3.004499  |
| 1 | -3.492488 | 3.856187  | 1.493043  |
| 1 | -3.859997 | 3.100510  | 3.053923  |
| 7 | -6.213498 | 1.475577  | 2.399824  |
| 7 | -6.391265 | 0.729927  | 1.603877  |

---

**<sup>10</sup>SS<sup>TS(C-D)</sup>FE(cys)**

---

|                                              |                             |                  |
|----------------------------------------------|-----------------------------|------------------|
| Number of imaginary frequencies: 1           | Electronic energy:          | HF=-3048.4458203 |
| Zero-point correction=                       | 0.841674 (Hartree/Particle) |                  |
| Thermal correction to Energy=                | 0.900087                    |                  |
| Thermal correction to Enthalpy=              | 0.901031                    |                  |
| Thermal correction to Gibbs Free Energy=     | 0.747483                    |                  |
| Sum of electronic and zero-point Energies=   | -3047.604146                |                  |
| Sum of electronic and thermal Energies=      | -3047.545734                |                  |
| Sum of electronic and thermal Enthalpies=    | -3047.544789                |                  |
| Sum of electronic and thermal Free Energies= | -3047.698337                |                  |

.....  
 Cartesian Coordinates  
 .....

|    |           |           |           |
|----|-----------|-----------|-----------|
| 6  | 2.718403  | 1.244630  | 3.721561  |
| 6  | 1.876185  | 2.221947  | 3.186037  |
| 6  | 0.709210  | 1.854609  | 2.513804  |
| 6  | 0.334372  | 0.508037  | 2.354635  |
| 6  | 1.178159  | -0.453909 | 2.961181  |
| 6  | 2.355974  | -0.097535 | 3.617856  |
| 6  | -0.885466 | 0.071083  | 1.614308  |
| 8  | 0.886539  | -1.805247 | 2.915722  |
| 6  | -0.473148 | -2.112049 | 2.872328  |
| 26 | -0.835891 | -0.102019 | -0.499864 |
| 7  | -2.492632 | 1.062097  | -0.693811 |
| 6  | -2.509197 | 2.419555  | -0.795351 |
| 6  | -3.878350 | 2.906130  | -0.940147 |
| 6  | -4.683922 | 1.787230  | -0.925729 |
| 6  | -3.796682 | 0.651144  | -0.778853 |
| 6  | -1.382208 | 3.236773  | -0.812939 |
| 6  | -0.060498 | 2.816360  | -0.757018 |
| 7  | 0.360775  | 1.522919  | -0.625503 |
| 6  | 1.725772  | 1.560978  | -0.634783 |
| 6  | 2.202360  | 2.931600  | -0.784424 |
| 6  | 1.081805  | 3.715567  | -0.850789 |
| 6  | -4.219541 | -0.674741 | -0.754662 |
| 6  | -3.396288 | -1.788723 | -0.650187 |
| 7  | -2.040903 | -1.743760 | -0.483286 |
| 6  | -1.615710 | -3.040839 | -0.394663 |
| 6  | -2.738234 | -3.951204 | -0.472239 |
| 6  | -3.859504 | -3.175234 | -0.663716 |
| 6  | 2.547713  | 0.448070  | -0.505668 |
| 6  | 2.114477  | -0.865274 | -0.367272 |
| 7  | 0.810381  | -1.268835 | -0.376891 |
| 6  | 0.829111  | -2.632691 | -0.274375 |
| 6  | 2.196993  | -3.117310 | -0.168498 |
| 6  | 3.000926  | -2.010837 | -0.220848 |
| 6  | -0.290116 | -3.455074 | -0.278602 |
| 6  | -2.126841 | 0.673543  | 2.147422  |
| 8  | -3.121863 | -0.255593 | 2.316025  |
| 8  | -2.307810 | 1.846530  | 2.441768  |
| 1  | -0.115060 | -4.523870 | -0.205904 |
| 1  | -5.283948 | -0.856805 | -0.825662 |
| 1  | -1.548133 | 4.302693  | -0.922090 |
| 1  | 3.615640  | 0.615520  | -0.525632 |
| 1  | 0.058174  | 2.613419  | 2.098037  |
| 1  | 2.126631  | 3.275928  | 3.287588  |
| 1  | 2.966199  | -0.886550 | 4.048480  |
| 1  | 3.642969  | 1.519882  | 4.222205  |
| 1  | -1.009914 | -1.887322 | 3.801120  |
| 1  | -0.945940 | -1.168911 | 1.951833  |

|    |           |           |           |
|----|-----------|-----------|-----------|
| 1  | -0.622575 | -3.114455 | 2.479770  |
| 6  | 0.824862  | -0.227200 | -3.534757 |
| 1  | 1.425417  | -1.052587 | -3.137247 |
| 1  | 0.774526  | -0.329570 | -4.625376 |
| 1  | 1.333887  | 0.713786  | -3.299487 |
| 16 | -0.884584 | -0.255496 | -2.876994 |
| 6  | 0.975188  | 5.204243  | -1.002407 |
| 1  | 1.960760  | 5.679511  | -1.034674 |
| 1  | 0.445781  | 5.482358  | -1.923532 |
| 1  | 0.422076  | 5.655330  | -0.167802 |
| 6  | 2.587191  | -4.556591 | -0.011528 |
| 1  | 2.275872  | -5.160252 | -0.874889 |
| 1  | 3.671440  | -4.670579 | 0.091870  |
| 1  | 2.123476  | -5.004911 | 0.876906  |
| 6  | -2.641186 | -5.446966 | -0.424054 |
| 1  | -2.067044 | -5.788831 | 0.446908  |
| 1  | -3.630821 | -5.912055 | -0.372104 |
| 1  | -2.141122 | -5.850958 | -1.315299 |
| 6  | -6.179100 | 1.719719  | -1.006424 |
| 1  | -6.537609 | 1.644835  | -2.043570 |
| 1  | -6.574996 | 0.852966  | -0.466091 |
| 1  | -6.630544 | 2.620432  | -0.575045 |
| 6  | -4.245585 | 4.312366  | -1.030021 |
| 6  | -5.338612 | 4.841144  | -1.607509 |
| 1  | -3.545052 | 5.006628  | -0.565363 |
| 1  | -5.514338 | 5.913602  | -1.586445 |
| 1  | -6.072186 | 4.239635  | -2.134876 |
| 6  | -5.219058 | -3.677005 | -0.845350 |
| 6  | -6.195413 | -3.169695 | -1.616002 |
| 1  | -5.443404 | -4.599157 | -0.305482 |
| 1  | -7.170727 | -3.647501 | -1.663164 |
| 1  | -6.050554 | -2.292346 | -2.238303 |
| 6  | 4.496701  | -1.938233 | -0.112055 |
| 6  | 5.198077  | -1.759739 | -1.494126 |
| 1  | 4.880841  | -2.854272 | 0.351401  |
| 1  | 4.793315  | -1.108473 | 0.540483  |
| 1  | 4.937825  | -2.597349 | -2.146809 |
| 1  | 4.862315  | -0.830460 | -1.960516 |
| 6  | 3.639191  | 3.371845  | -0.894436 |
| 6  | 4.515766  | 3.176094  | 0.377930  |
| 1  | 3.647083  | 4.436004  | -1.152232 |
| 1  | 4.126859  | 2.862199  | -1.732517 |
| 1  | 5.153613  | 4.061679  | 0.513244  |
| 1  | 3.902892  | 3.085767  | 1.277910  |
| 6  | 6.690932  | -1.694166 | -1.323802 |
| 8  | 7.351496  | -0.694605 | -1.081632 |
| 8  | 7.285929  | -2.904406 | -1.410372 |
| 1  | 8.232406  | -2.752414 | -1.224050 |
| 6  | 5.471098  | 1.993656  | 0.376688  |
| 8  | 5.806144  | 1.381979  | 1.372231  |

|   |           |           |           |
|---|-----------|-----------|-----------|
| 8 | 5.954064  | 1.709776  | -0.852354 |
| 1 | 6.532958  | 0.909690  | -0.790825 |
| 6 | -4.373996 | 0.253598  | 2.789125  |
| 6 | -5.299393 | -0.934690 | 2.996565  |
| 1 | -4.780100 | 0.956227  | 2.053083  |
| 1 | -4.214703 | 0.810461  | 3.719845  |
| 1 | -6.278256 | -0.594922 | 3.357169  |
| 1 | -5.441924 | -1.480913 | 2.058778  |
| 1 | -4.881358 | -1.628351 | 3.734834  |

---

<sup>10</sup>SSD<sub>FE(cys)</sub>

---

Number of imaginary frequencies: 0    Electronic energy:    HF=-3048.4689254  
Zero-point correction=                    0.844887 (Hartree/Particle)  
Thermal correction to Energy=            0.904580  
Thermal correction to Enthalpy=         0.905525  
Thermal correction to Gibbs Free Energy= 0.748845  
Sum of electronic and zero-point Energies= -3047.624038  
Sum of electronic and thermal Energies= -3047.564345  
Sum of electronic and thermal Enthalpies= -3047.563401  
Sum of electronic and thermal Free Energies= -3047.720080

.....  
Cartesian Coordinates

.....

|    |           |           |           |
|----|-----------|-----------|-----------|
| 6  | 2.148832  | 2.768425  | 3.322634  |
| 6  | 0.900342  | 3.261755  | 2.937807  |
| 6  | -0.071397 | 2.403929  | 2.426038  |
| 6  | 0.141526  | 1.014601  | 2.294411  |
| 6  | 1.400646  | 0.544447  | 2.743872  |
| 6  | 2.397056  | 1.398761  | 3.219858  |
| 6  | -0.874201 | 0.078990  | 1.764808  |
| 8  | 1.628499  | -0.823304 | 2.667983  |
| 6  | 2.343247  | -1.456802 | 3.631616  |
| 26 | -0.840648 | -0.083546 | -0.554688 |
| 7  | -2.421936 | 1.158325  | -0.756771 |
| 6  | -2.410532 | 2.515755  | -0.851727 |
| 6  | -3.767846 | 3.033090  | -0.994400 |
| 6  | -4.596071 | 1.933042  | -0.990615 |
| 6  | -3.733897 | 0.775410  | -0.847307 |
| 6  | -1.262200 | 3.300073  | -0.898852 |
| 6  | 0.039172  | 2.818620  | -0.874638 |
| 7  | 0.390884  | 1.506773  | -0.737271 |
| 6  | 1.753494  | 1.465132  | -0.822357 |
| 6  | 2.296776  | 2.806908  | -1.012548 |
| 6  | 1.221325  | 3.652147  | -1.032909 |
| 6  | -4.196527 | -0.535513 | -0.809913 |
| 6  | -3.421728 | -1.677107 | -0.625664 |
| 7  | -2.074536 | -1.679219 | -0.408215 |
| 6  | -1.727684 | -2.969872 | -0.111388 |
| 6  | -2.890023 | -3.827780 | -0.133148 |

|    |           |           |           |
|----|-----------|-----------|-----------|
| 6  | -3.955014 | -3.032956 | -0.502173 |
| 6  | 2.525641  | 0.317417  | -0.702517 |
| 6  | 2.053644  | -0.964034 | -0.433568 |
| 7  | 0.740403  | -1.316834 | -0.336570 |
| 6  | 0.719852  | -2.650189 | -0.025788 |
| 6  | 2.071969  | -3.166526 | 0.093665  |
| 6  | 2.908003  | -2.112599 | -0.165157 |
| 6  | -0.428144 | -3.418495 | 0.111467  |
| 6  | -2.255484 | 0.331626  | 2.188593  |
| 8  | -2.917247 | -0.850132 | 2.459835  |
| 8  | -2.830587 | 1.404043  | 2.335411  |
| 1  | -0.299743 | -4.468243 | 0.354696  |
| 1  | -5.265597 | -0.682641 | -0.892282 |
| 1  | -1.391265 | 4.370070  | -1.017037 |
| 1  | 3.597255  | 0.436590  | -0.791115 |
| 1  | -1.037345 | 2.791444  | 2.130057  |
| 1  | 0.682447  | 4.324628  | 3.023558  |
| 1  | 3.373510  | 0.995560  | 3.468869  |
| 1  | 2.924247  | 3.433111  | 3.697132  |
| 1  | 2.743514  | -0.879955 | 4.457695  |
| 1  | -0.606410 | -0.957896 | 1.933750  |
| 1  | 2.794385  | -2.383352 | 3.299789  |
| 6  | -0.590718 | -2.047176 | -3.321601 |
| 1  | -1.454814 | -2.630441 | -2.986895 |
| 1  | -0.515094 | -2.133678 | -4.411955 |
| 1  | 0.312428  | -2.476832 | -2.875651 |
| 16 | -0.768104 | -0.272368 | -2.901214 |
| 6  | 1.190137  | 5.144286  | -1.178152 |
| 1  | 2.193013  | 5.557832  | -1.325135 |
| 1  | 0.576941  | 5.457096  | -2.033567 |
| 1  | 0.766453  | 5.624861  | -0.286001 |
| 6  | 2.419040  | -4.584438 | 0.439590  |
| 1  | 2.081658  | -5.287408 | -0.334519 |
| 1  | 3.500115  | -4.719491 | 0.551117  |
| 1  | 1.949236  | -4.897945 | 1.380946  |
| 6  | -2.875285 | -5.305687 | 0.122017  |
| 1  | -2.346919 | -5.547892 | 1.052705  |
| 1  | -3.889406 | -5.710050 | 0.202547  |
| 1  | -2.371912 | -5.855558 | -0.685655 |
| 6  | -6.092167 | 1.900290  | -1.061964 |
| 1  | -6.459279 | 1.814878  | -2.095323 |
| 1  | -6.504061 | 1.053915  | -0.501960 |
| 1  | -6.517402 | 2.819161  | -0.643221 |
| 6  | -4.100688 | 4.448702  | -1.075086 |
| 6  | -5.174006 | 5.007400  | -1.660651 |
| 1  | -3.388794 | 5.121846  | -0.596559 |
| 1  | -5.325915 | 6.083311  | -1.632206 |
| 1  | -5.915317 | 4.426560  | -2.200370 |
| 6  | -5.322026 | -3.492145 | -0.726835 |
| 6  | -6.220486 | -3.012076 | -1.602780 |

|   |           |           |           |
|---|-----------|-----------|-----------|
| 1 | -5.623244 | -4.353681 | -0.128017 |
| 1 | -7.212987 | -3.449115 | -1.677125 |
| 1 | -5.992943 | -2.196469 | -2.281924 |
| 6 | 4.408049  | -2.087085 | -0.115561 |
| 6 | 5.069423  | -2.061884 | -1.526579 |
| 1 | 4.774093  | -2.972809 | 0.417250  |
| 1 | 4.757737  | -1.216534 | 0.451615  |
| 1 | 4.756849  | -2.936719 | -2.101874 |
| 1 | 4.755923  | -1.160904 | -2.061320 |
| 6 | 3.749507  | 3.172325  | -1.160617 |
| 6 | 4.613739  | 3.046467  | 0.130967  |
| 1 | 3.803702  | 4.211763  | -1.500813 |
| 1 | 4.217567  | 2.576928  | -1.951929 |
| 1 | 5.344855  | 3.867819  | 0.145777  |
| 1 | 4.001375  | 3.136496  | 1.031092  |
| 6 | 6.568126  | -2.039594 | -1.399864 |
| 8 | 7.250737  | -1.077718 | -1.078978 |
| 8 | 7.141286  | -3.241801 | -1.626891 |
| 1 | 8.096909  | -3.118006 | -1.467179 |
| 6 | 5.433775  | 1.775523  | 0.262115  |
| 8 | 5.605545  | 1.159038  | 1.296295  |
| 8 | 6.002964  | 1.412921  | -0.908113 |
| 1 | 6.498885  | 0.566746  | -0.782525 |
| 6 | -4.279582 | -0.715938 | 2.867111  |
| 6 | -4.766861 | -2.093115 | 3.290525  |
| 1 | -4.875197 | -0.322446 | 2.034540  |
| 1 | -4.349807 | 0.006844  | 3.688103  |
| 1 | -5.816528 | -2.045307 | 3.606737  |
| 1 | -4.684218 | -2.801213 | 2.459862  |
| 1 | -4.170209 | -2.475136 | 4.126658  |

-----  
<sup>10</sup>SS<sup>TS(D-E)</sup><sub>FE(cys)</sub>  
 -----

Number of imaginary frequencies: 1    Electronic energy:    HF=-3048.4659826  
 Zero-point correction=                    0.843821 (Hartree/Particle)  
 Thermal correction to Energy=            0.903326  
 Thermal correction to Enthalpy=         0.904271  
 Thermal correction to Gibbs Free Energy= 0.746542  
 Sum of electronic and zero-point Energies= -3047.622161  
 Sum of electronic and thermal Energies= -3047.562656  
 Sum of electronic and thermal Enthalpies= -3047.561712  
 Sum of electronic and thermal Free Energies= -3047.719441

-----  
 Cartesian Coordinates  
 -----

|   |           |          |          |
|---|-----------|----------|----------|
| 6 | 1.985412  | 3.997331 | 2.808350 |
| 6 | 0.651634  | 4.279282 | 2.498612 |
| 6 | -0.284866 | 3.255283 | 2.406476 |
| 6 | 0.068679  | 1.894319 | 2.612351 |
| 6 | 1.442766  | 1.643811 | 2.921195 |

|    |           |           |           |
|----|-----------|-----------|-----------|
| 6  | 2.376703  | 2.670270  | 3.027082  |
| 6  | -0.862296 | 0.810538  | 2.564196  |
| 8  | 1.768797  | 0.326085  | 3.162795  |
| 6  | 3.072121  | -0.068470 | 3.207825  |
| 26 | -0.836037 | -0.336557 | -0.753622 |
| 7  | -2.411078 | 0.900020  | -1.007043 |
| 6  | -2.387910 | 2.243140  | -1.247433 |
| 6  | -3.739279 | 2.758000  | -1.437259 |
| 6  | -4.580238 | 1.675290  | -1.306192 |
| 6  | -3.731400 | 0.530653  | -1.038763 |
| 6  | -1.232354 | 3.006027  | -1.370811 |
| 6  | 0.065294  | 2.523813  | -1.278626 |
| 7  | 0.406768  | 1.228245  | -1.002330 |
| 6  | 1.772897  | 1.176754  | -1.062914 |
| 6  | 2.322927  | 2.484739  | -1.403767 |
| 6  | 1.252388  | 3.329726  | -1.515082 |
| 6  | -4.208595 | -0.757753 | -0.824136 |
| 6  | -3.445001 | -1.864140 | -0.466868 |
| 7  | -2.093603 | -1.842323 | -0.257791 |
| 6  | -1.762719 | -3.071348 | 0.253674  |
| 6  | -2.934096 | -3.908563 | 0.374539  |
| 6  | -3.991691 | -3.174266 | -0.119379 |
| 6  | 2.534632  | 0.053650  | -0.770188 |
| 6  | 2.045790  | -1.164997 | -0.307429 |
| 7  | 0.723574  | -1.485852 | -0.184178 |
| 6  | 0.685601  | -2.753587 | 0.339684  |
| 6  | 2.028884  | -3.251319 | 0.573944  |
| 6  | 2.881597  | -2.260631 | 0.161019  |
| 6  | -0.471341 | -3.486017 | 0.566214  |
| 6  | -2.293236 | 0.963603  | 2.570674  |
| 8  | -2.909973 | -0.245971 | 2.833290  |
| 8  | -2.961118 | 1.987888  | 2.420258  |
| 1  | -0.356446 | -4.484089 | 0.976693  |
| 1  | -5.279686 | -0.903415 | -0.880442 |
| 1  | -1.351731 | 4.059345  | -1.598011 |
| 1  | 3.608458  | 0.150027  | -0.862231 |
| 1  | -1.321541 | 3.468433  | 2.179052  |
| 1  | 0.336475  | 5.307902  | 2.334877  |
| 1  | 3.398885  | 2.438917  | 3.306212  |
| 1  | 2.717927  | 4.796072  | 2.898186  |
| 1  | 3.786925  | 0.429928  | 2.559047  |
| 1  | -0.489509 | -0.190119 | 2.732879  |
| 1  | 3.156018  | -1.130015 | 3.411533  |
| 6  | -0.542016 | -2.754124 | -3.171850 |
| 1  | -1.423221 | -3.257138 | -2.759110 |
| 1  | -0.432679 | -3.058017 | -4.219968 |
| 1  | 0.341977  | -3.095164 | -2.621760 |
| 16 | -0.711789 | -0.928826 | -3.103220 |
| 6  | 1.231638  | 4.800793  | -1.803438 |
| 1  | 0.589915  | 5.039510  | -2.661469 |



|   |           |           |           |
|---|-----------|-----------|-----------|
| 1 | 0.848253  | 5.366632  | -0.943797 |
| 1 | 2.232533  | 5.184500  | -2.025670 |
| 6 | 2.355003  | -4.593725 | 1.158578  |
| 1 | 2.019728  | -5.413603 | 0.508647  |
| 1 | 3.432702  | -4.717811 | 1.308100  |
| 1 | 1.869338  | -4.739833 | 2.132242  |
| 6 | -2.935641 | -5.322009 | 0.876379  |
| 1 | -3.954104 | -5.702610 | 1.003038  |
| 1 | -2.420706 | -6.001748 | 0.183132  |
| 1 | -2.427049 | -5.406390 | 1.845147  |
| 6 | -6.077332 | 1.655390  | -1.359562 |
| 1 | -6.455072 | 1.451846  | -2.372226 |
| 1 | -6.494407 | 0.887776  | -0.698954 |
| 1 | -6.485981 | 2.623596  | -1.050168 |
| 6 | -4.058719 | 4.160858  | -1.665867 |
| 6 | -5.123677 | 4.661842  | -2.314801 |
| 1 | -3.344883 | 4.874520  | -1.253735 |
| 1 | -5.268819 | 5.735642  | -2.399900 |
| 1 | -5.864960 | 4.031795  | -2.796389 |
| 6 | -5.366513 | -3.645335 | -0.258060 |
| 6 | -6.258335 | -3.309586 | -1.204658 |
| 1 | -5.679485 | -4.383543 | 0.482433  |
| 1 | -7.258151 | -3.736060 | -1.203411 |
| 1 | -6.018037 | -2.628174 | -2.014812 |
| 6 | 4.381948  | -2.249356 | 0.210438  |
| 6 | 5.039299  | -2.463827 | -1.186234 |
| 1 | 4.736460  | -3.041228 | 0.880916  |
| 1 | 4.746515  | -1.303227 | 0.626196  |
| 1 | 4.728801  | -3.424651 | -1.603662 |
| 1 | 4.719771  | -1.668793 | -1.866026 |
| 6 | 3.774192  | 2.825224  | -1.613287 |
| 6 | 4.657327  | 2.883792  | -0.330212 |
| 1 | 3.822718  | 3.806983  | -2.095497 |
| 1 | 4.233942  | 2.125171  | -2.319345 |
| 1 | 5.408230  | 3.676579  | -0.458697 |
| 1 | 4.062408  | 3.133208  | 0.551309  |
| 6 | 6.538401  | -2.412998 | -1.071731 |
| 8 | 7.215494  | -1.407436 | -0.912900 |
| 8 | 7.118979  | -3.631579 | -1.106807 |
| 1 | 8.074837  | -3.478626 | -0.976067 |
| 6 | 5.445934  | 1.626169  | -0.018605 |
| 8 | 5.577330  | 1.138836  | 1.090088  |
| 8 | 6.033281  | 1.107772  | -1.115134 |
| 1 | 6.499990  | 0.269010  | -0.874237 |
| 6 | -4.334556 | -0.205710 | 2.911599  |
| 6 | -4.802487 | -1.559389 | 3.423154  |
| 1 | -4.751493 | 0.008534  | 1.920424  |
| 1 | -4.644509 | 0.607334  | 3.578751  |
| 1 | -5.897049 | -1.579530 | 3.496492  |
| 1 | -4.485399 | -2.357175 | 2.744168  |

1 -4.384903 -1.764861 4.415486

-----  
 $^3\text{A}_{\text{Fe(cys)}}$   
-----

Number of imaginary frequencies: 0    Electronic energy:    HF=-2396.4851303  
Zero-point correction=                    0.633704 (Hartree/Particle)  
Thermal correction to Energy=            0.679384  
Thermal correction to Enthalpy=         0.680328  
Thermal correction to Gibbs Free Energy= 0.548637  
Sum of electronic and zero-point Energies= -2395.851426  
Sum of electronic and thermal Energies= -2395.805746  
Sum of electronic and thermal Enthalpies= -2395.804802  
Sum of electronic and thermal Free Energies= -2395.936493

-----  
Cartesian Coordinates  
-----

|    |           |           |           |
|----|-----------|-----------|-----------|
| 26 | 1.042663  | -0.067033 | 0.031487  |
| 7  | 2.415093  | -1.515610 | -0.435089 |
| 6  | 2.168413  | -2.850429 | -0.623365 |
| 6  | 3.402492  | -3.579028 | -0.810598 |
| 6  | 4.418157  | -2.647095 | -0.760434 |
| 6  | 3.773599  | -1.363190 | -0.491267 |
| 6  | 0.902329  | -3.434545 | -0.635444 |
| 6  | -0.302665 | -2.763656 | -0.487187 |
| 7  | -0.435960 | -1.410099 | -0.295697 |
| 6  | -1.782679 | -1.167932 | -0.255025 |
| 6  | -2.532789 | -2.410614 | -0.394617 |
| 6  | -1.606756 | -3.407428 | -0.539766 |
| 6  | -2.368188 | 0.090149  | -0.147440 |
| 6  | -1.692144 | 1.303653  | -0.060069 |
| 7  | -0.332335 | 1.440243  | -0.029549 |
| 6  | -0.089096 | 2.783026  | 0.094920  |
| 6  | -1.335752 | 3.530464  | 0.131399  |
| 6  | -2.340419 | 2.605062  | 0.032077  |
| 6  | 1.170029  | 3.359173  | 0.197226  |
| 6  | 2.383302  | 2.677331  | 0.154841  |
| 6  | 3.693455  | 3.314729  | 0.263478  |
| 6  | 4.619517  | 2.298252  | 0.158404  |
| 6  | 3.863767  | 1.073217  | -0.013196 |
| 7  | 2.513088  | 1.325592  | 0.008442  |
| 6  | 4.444687  | -0.170451 | -0.242810 |
| 1  | 0.855881  | -4.509392 | -0.780815 |
| 1  | 5.525711  | -0.220508 | -0.217549 |
| 1  | 1.206802  | 4.435068  | 0.330323  |
| 1  | -3.453160 | 0.129318  | -0.142875 |
| 16 | 1.122056  | -0.284532 | 2.520589  |
| 6  | 0.807610  | -2.053677 | 2.910988  |
| 1  | 1.603443  | -2.697276 | 2.515100  |
| 1  | 0.763010  | -2.200002 | 3.997665  |

|   |           |           |           |
|---|-----------|-----------|-----------|
| 1 | -0.142565 | -2.396342 | 2.482944  |
| 6 | -1.441059 | 5.021502  | 0.258207  |
| 1 | -0.924466 | 5.387688  | 1.155163  |
| 1 | -0.992588 | 5.539807  | -0.600852 |
| 1 | -2.484926 | 5.345653  | 0.326766  |
| 6 | -1.830953 | -4.879044 | -0.724552 |
| 1 | -1.334538 | -5.255283 | -1.629107 |
| 1 | -1.436018 | -5.461188 | 0.119476  |
| 1 | -2.896730 | -5.114647 | -0.814349 |
| 6 | 3.503115  | -5.053050 | -1.069058 |
| 1 | 2.953322  | -5.632561 | -0.316259 |
| 1 | 3.086779  | -5.326375 | -2.049062 |
| 1 | 4.543101  | -5.394636 | -1.054817 |
| 6 | 6.113688  | 2.410284  | 0.154351  |
| 1 | 6.536625  | 2.337416  | 1.166762  |
| 1 | 6.578663  | 1.619499  | -0.444174 |
| 1 | 6.429712  | 3.375593  | -0.257843 |
| 6 | 5.836787  | -2.927075 | -0.955855 |
| 6 | 6.770375  | -2.133840 | -1.507761 |
| 1 | 6.156906  | -3.921766 | -0.639721 |
| 1 | 7.801354  | -2.466654 | -1.597250 |
| 1 | 6.538714  | -1.149667 | -1.902708 |
| 6 | 3.901128  | 4.748823  | 0.399172  |
| 6 | 4.960405  | 5.384370  | 0.931733  |
| 1 | 3.092232  | 5.373912  | 0.019138  |
| 1 | 5.001840  | 6.470325  | 0.955271  |
| 1 | 5.795048  | 4.857262  | 1.382475  |
| 6 | -4.029486 | -2.530775 | -0.339627 |
| 6 | -4.571730 | -2.476966 | 1.099930  |
| 1 | -4.355860 | -3.469112 | -0.801571 |
| 1 | -4.506247 | -1.734103 | -0.923699 |
| 1 | -4.132393 | -3.275462 | 1.711528  |
| 1 | -4.276689 | -1.543897 | 1.595663  |
| 6 | -3.823287 | 2.843775  | -0.017051 |
| 6 | -4.383023 | 2.778759  | -1.449352 |
| 1 | -4.068200 | 3.822356  | 0.409716  |
| 1 | -4.355368 | 2.111370  | 0.602127  |
| 1 | -3.878575 | 3.509479  | -2.095490 |
| 1 | -4.180402 | 1.802789  | -1.906937 |
| 6 | -6.075331 | -2.600918 | 1.174571  |
| 8 | -6.838077 | -2.736138 | 0.240650  |
| 8 | -6.521979 | -2.547233 | 2.458688  |
| 1 | -7.492800 | -2.625019 | 2.399504  |
| 6 | -5.869063 | 3.040797  | -1.524908 |
| 8 | -6.599355 | 3.344056  | -0.605480 |
| 8 | -6.339730 | 2.904455  | -2.795465 |
| 1 | -7.296411 | 3.087802  | -2.738031 |

---

${}^3\mathbf{B}_{\text{Fe(cys)}}$

---

Number of imaginary frequencies: 0    Electronic energy:    HF=-3158.0028436  
 Zero-point correction=                    0.855532 (Hartree/Particle)  
 Thermal correction to Energy=            0.918613  
 Thermal correction to Enthalpy=         0.919557  
 Thermal correction to Gibbs Free Energy= 0.745729  
 Sum of electronic and zero-point Energies= -3157.147312  
 Sum of electronic and thermal Energies= -3157.084231  
 Sum of electronic and thermal Enthalpies= -3157.083287  
 Sum of electronic and thermal Free Energies= -3157.257115

.....  
 Cartesian Coordinates

.....

|    |           |           |           |
|----|-----------|-----------|-----------|
| 6  | 2.402469  | -2.165540 | 4.566668  |
| 6  | 3.252146  | -1.061687 | 4.540213  |
| 6  | 2.750697  | 0.188391  | 4.175808  |
| 6  | 1.405040  | 0.354713  | 3.823306  |
| 6  | 0.553904  | -0.778587 | 3.841469  |
| 6  | 1.056608  | -2.027811 | 4.220631  |
| 6  | 0.897471  | 1.678696  | 3.410734  |
| 7  | -0.329322 | 2.039231  | 3.731810  |
| 7  | -1.379188 | 2.364932  | 4.019375  |
| 8  | -0.736851 | -0.556237 | 3.479328  |
| 6  | -1.600326 | -1.669345 | 3.268710  |
| 26 | -1.360095 | -0.387507 | -0.956869 |
| 7  | -2.886563 | 0.961167  | -0.789593 |
| 6  | -2.847561 | 2.298934  | -1.058104 |
| 6  | -4.170084 | 2.895306  | -0.902624 |
| 6  | -5.009078 | 1.864908  | -0.526452 |
| 6  | -4.191727 | 0.671075  | -0.479909 |
| 6  | -1.709059 | 2.989654  | -1.470259 |
| 6  | -0.436708 | 2.448489  | -1.595121 |
| 7  | -0.102373 | 1.151239  | -1.307201 |
| 6  | 1.253098  | 1.065477  | -1.477336 |
| 6  | 1.797825  | 2.341097  | -1.935600 |
| 6  | 0.739294  | 3.204194  | -2.013511 |
| 6  | -4.681925 | -0.601996 | -0.196576 |
| 6  | -3.946447 | -1.781396 | -0.150994 |
| 7  | -2.585031 | -1.860713 | -0.298501 |
| 6  | -2.243390 | -3.159488 | -0.008508 |
| 6  | -3.419307 | -3.942251 | 0.303753  |
| 6  | -4.498644 | -3.092907 | 0.190321  |
| 6  | 2.026442  | -0.058592 | -1.215678 |
| 6  | 1.554842  | -1.294655 | -0.783125 |
| 7  | 0.239395  | -1.611681 | -0.597388 |
| 6  | 0.213792  | -2.932440 | -0.231697 |
| 6  | 1.561487  | -3.471585 | -0.159380 |
| 6  | 2.402874  | -2.442424 | -0.496130 |
| 6  | -0.942868 | -3.659936 | 0.026794  |
| 6  | 1.661195  | 2.653026  | 2.623013  |
| 8  | 0.929021  | 3.764747  | 2.366173  |

|    |           |           |           |
|----|-----------|-----------|-----------|
| 8  | 2.812601  | 2.499333  | 2.253355  |
| 1  | -0.823370 | -4.708009 | 0.284222  |
| 1  | -5.737843 | -0.682522 | 0.028423  |
| 1  | -1.824626 | 4.038507  | -1.722414 |
| 1  | 3.095749  | 0.039812  | -1.350601 |
| 1  | 3.408075  | 1.048357  | 4.133771  |
| 1  | 4.301836  | -1.166395 | 4.800015  |
| 1  | 0.405166  | -2.893916 | 4.229090  |
| 1  | 2.780970  | -3.144407 | 4.850480  |
| 1  | -2.520819 | -1.255525 | 2.856657  |
| 1  | -1.170901 | -2.370362 | 2.546385  |
| 1  | -1.814973 | -2.184964 | 4.215238  |
| 6  | -1.820156 | -2.667931 | -3.591345 |
| 1  | -2.695306 | -3.032430 | -3.039722 |
| 1  | -1.956875 | -2.922417 | -4.649809 |
| 1  | -0.941442 | -3.212502 | -3.223147 |
| 16 | -1.608825 | -0.850659 | -3.398640 |
| 6  | 0.720176  | 4.632986  | -2.471349 |
| 1  | 1.722607  | 4.978914  | -2.744971 |
| 1  | 0.074309  | 4.765359  | -3.349598 |
| 1  | 0.340826  | 5.311309  | -1.694831 |
| 6  | 1.904158  | -4.880431 | 0.225219  |
| 1  | 1.484800  | -5.148327 | 1.204378  |
| 1  | 1.511290  | -5.607674 | -0.498635 |
| 1  | 2.987570  | -5.031037 | 0.281153  |
| 6  | -3.418325 | -5.407169 | 0.626255  |
| 1  | -3.128418 | -6.013892 | -0.242866 |
| 1  | -2.710409 | -5.646803 | 1.430844  |
| 1  | -4.408094 | -5.751221 | 0.943081  |
| 6  | -6.467524 | 1.937344  | -0.189562 |
| 1  | -7.106639 | 1.820228  | -1.077036 |
| 1  | -6.757294 | 1.156604  | 0.521833  |
| 1  | -6.714264 | 2.907640  | 0.256961  |
| 6  | -4.456945 | 4.311422  | -1.077628 |
| 6  | -5.637264 | 4.888351  | -1.366478 |
| 1  | -3.601025 | 4.976125  | -0.955660 |
| 1  | -5.720553 | 5.968813  | -1.450899 |
| 1  | -6.540531 | 4.316747  | -1.553211 |
| 6  | -5.896999 | -3.466954 | 0.375155  |
| 6  | -6.977472 | -2.961264 | -0.242999 |
| 1  | -6.066307 | -4.283106 | 1.080404  |
| 1  | -7.972895 | -3.335182 | -0.016987 |
| 1  | -6.905391 | -2.190937 | -1.004112 |
| 6  | 3.905013  | -2.450549 | -0.544216 |
| 6  | 4.477815  | -2.587320 | -1.988114 |
| 1  | 4.289689  | -3.280622 | 0.060471  |
| 1  | 4.304438  | -1.528486 | -0.107640 |
| 1  | 4.083406  | -3.492725 | -2.456278 |
| 1  | 4.176990  | -1.720438 | -2.580637 |
| 6  | 3.239534  | 2.566695  | -2.303696 |

|   |           |           |           |
|---|-----------|-----------|-----------|
| 6 | 4.225873  | 2.662266  | -1.096243 |
| 1 | 3.328138  | 3.481260  | -2.900718 |
| 1 | 3.561401  | 1.748848  | -2.956354 |
| 1 | 4.491302  | 3.699806  | -0.877675 |
| 1 | 3.748765  | 2.261599  | -0.192920 |
| 6 | 5.983021  | -2.648884 | -1.958376 |
| 8 | 6.753932  | -1.704588 | -1.876940 |
| 8 | 6.455003  | -3.917524 | -1.977947 |
| 1 | 7.425929  | -3.841136 | -1.906023 |
| 6 | 5.521557  | 1.893746  | -1.279528 |
| 8 | 6.638125  | 2.313503  | -1.055661 |
| 8 | 5.279348  | 0.630648  | -1.697535 |
| 1 | 6.099750  | 0.088931  | -1.732406 |
| 6 | 1.549769  | 4.751193  | 1.517071  |
| 6 | 0.579543  | 5.913410  | 1.403381  |
| 1 | 1.752185  | 4.295882  | 0.543101  |
| 1 | 2.505531  | 5.052369  | 1.959010  |
| 1 | 1.005975  | 6.693068  | 0.761988  |
| 1 | -0.366809 | 5.581450  | 0.964611  |
| 1 | 0.370897  | 6.349454  | 2.386393  |

---

**<sup>3</sup>TS(B-C)<sub>Fe(cys)</sub>**

---

Number of imaginary frequencies: 1    Electronic energy:    HF=-3157.9465852  
Zero-point correction=                    0.853586 (Hartree/Particle)  
Thermal correction to Energy=            0.915206  
Thermal correction to Enthalpy=         0.916150  
Thermal correction to Gibbs Free Energy= 0.753976  
Sum of electronic and zero-point Energies= -3157.092999  
Sum of electronic and thermal Energies= -3157.031379  
Sum of electronic and thermal Enthalpies= -3157.030435  
Sum of electronic and thermal Free Energies= -3157.192609

---

Cartesian Coordinates

---

|    |           |           |           |
|----|-----------|-----------|-----------|
| 6  | -1.127531 | -3.939846 | 3.489480  |
| 6  | 0.099489  | -3.293522 | 3.381359  |
| 6  | 0.165787  | -2.000156 | 2.859394  |
| 6  | -0.970847 | -1.294954 | 2.412350  |
| 6  | -2.211684 | -1.992384 | 2.518958  |
| 6  | -2.282050 | -3.280265 | 3.061211  |
| 6  | -0.896912 | 0.086310  | 1.858449  |
| 7  | -2.277071 | 0.930349  | 2.582493  |
| 7  | -2.894574 | 1.792174  | 2.146167  |
| 8  | -3.325097 | -1.344287 | 2.064035  |
| 6  | -4.599139 | -1.874896 | 2.345408  |
| 26 | -0.717015 | 0.118132  | -0.629512 |
| 7  | -2.214845 | 1.465031  | -0.758464 |
| 6  | -2.128432 | 2.823969  | -0.715867 |
| 6  | -3.448582 | 3.428130  | -0.857931 |

|    |           |           |           |
|----|-----------|-----------|-----------|
| 6  | -4.332588 | 2.381797  | -0.993664 |
| 6  | -3.539312 | 1.169008  | -0.939583 |
| 6  | -0.940644 | 3.544643  | -0.645500 |
| 6  | 0.330282  | 2.989148  | -0.612730 |
| 7  | 0.600272  | 1.649438  | -0.554243 |
| 6  | 1.961024  | 1.531345  | -0.603365 |
| 6  | 2.585006  | 2.845768  | -0.686946 |
| 6  | 1.564735  | 3.757974  | -0.684861 |
| 6  | -4.070012 | -0.107493 | -1.084860 |
| 6  | -3.361960 | -1.303554 | -1.045192 |
| 7  | -2.029076 | -1.414652 | -0.773494 |
| 6  | -1.757237 | -2.754291 | -0.687791 |
| 6  | -2.955516 | -3.531870 | -0.902100 |
| 6  | -3.963731 | -2.630348 | -1.170700 |
| 6  | 2.668892  | 0.339377  | -0.545217 |
| 6  | 2.115498  | -0.930429 | -0.436836 |
| 7  | 0.781513  | -1.219709 | -0.470914 |
| 6  | 0.682563  | -2.584131 | -0.379677 |
| 6  | 1.997575  | -3.182513 | -0.236497 |
| 6  | 2.895937  | -2.148724 | -0.276435 |
| 6  | -0.498278 | -3.305316 | -0.470422 |
| 6  | 0.264188  | 0.896438  | 2.291587  |
| 8  | -0.055566 | 2.198557  | 2.560035  |
| 8  | 1.428956  | 0.520956  | 2.396506  |
| 1  | -0.432893 | -4.385041 | -0.392452 |
| 1  | -5.140637 | -0.181042 | -1.225113 |
| 1  | -1.008149 | 4.626329  | -0.682405 |
| 1  | 3.748758  | 0.406482  | -0.551033 |
| 1  | 1.122947  | -1.502538 | 2.789628  |
| 1  | 1.013130  | -3.782723 | 3.713085  |
| 1  | -3.240994 | -3.780810 | 3.138679  |
| 1  | -1.200637 | -4.943506 | 3.903446  |
| 1  | -5.315462 | -1.139666 | 1.972420  |
| 1  | -4.770454 | -2.829515 | 1.828645  |
| 1  | -4.749620 | -2.018672 | 3.425608  |
| 6  | -0.327426 | -1.481384 | -3.615326 |
| 1  | -1.198399 | -2.107008 | -3.396289 |
| 1  | -0.212685 | -1.413854 | -4.703758 |
| 1  | 0.563183  | -1.963941 | -3.200525 |
| 16 | -0.534912 | 0.219741  | -2.969377 |
| 6  | 1.639009  | 5.254325  | -0.760609 |
| 1  | 2.676147  | 5.600281  | -0.821350 |
| 1  | 1.109954  | 5.643067  | -1.640746 |
| 1  | 1.186441  | 5.729887  | 0.119915  |
| 6  | 2.249602  | -4.648859 | -0.050607 |
| 1  | 1.714692  | -5.032699 | 0.827755  |
| 1  | 1.911495  | -5.235231 | -0.915827 |
| 1  | 3.314793  | -4.861289 | 0.089565  |
| 6  | -3.020890 | -5.029796 | -0.875393 |
| 1  | -2.434221 | -5.479509 | -1.688253 |

|   |           |           |           |
|---|-----------|-----------|-----------|
| 1 | -2.622637 | -5.427050 | 0.067113  |
| 1 | -4.048736 | -5.390737 | -0.982604 |
| 6 | -5.824515 | 2.438868  | -1.116918 |
| 1 | -6.157686 | 2.457294  | -2.165056 |
| 1 | -6.300081 | 1.573938  | -0.641874 |
| 1 | -6.215385 | 3.343047  | -0.637441 |
| 6 | -3.703529 | 4.861345  | -0.806899 |
| 6 | -4.714765 | 5.534610  | -1.382054 |
| 1 | -2.984721 | 5.441492  | -0.227515 |
| 1 | -4.814541 | 6.608888  | -1.249890 |
| 1 | -5.454474 | 5.052165  | -2.013324 |
| 6 | -5.340322 | -2.972815 | -1.514538 |
| 6 | -6.181097 | -2.308912 | -2.325369 |
| 1 | -5.704515 | -3.905728 | -1.080005 |
| 1 | -7.187970 | -2.677628 | -2.503998 |
| 1 | -5.891087 | -1.404645 | -2.850922 |
| 6 | 4.390054  | -2.213686 | -0.128890 |
| 6 | 5.156443  | -2.103950 | -1.482458 |
| 1 | 4.671126  | -3.158631 | 0.350845  |
| 1 | 4.742002  | -1.409023 | 0.525994  |
| 1 | 4.813208  | -2.886952 | -2.163505 |
| 1 | 4.960846  | -1.128223 | -1.932937 |
| 6 | 4.069582  | 3.071602  | -0.771730 |
| 6 | 4.838896  | 2.754887  | 0.548192  |
| 1 | 4.273486  | 4.108873  | -1.059593 |
| 1 | 4.476891  | 2.447915  | -1.573897 |
| 1 | 5.059409  | 3.662640  | 1.115584  |
| 1 | 4.206991  | 2.123516  | 1.186762  |
| 6 | 6.640971  | -2.241442 | -1.263549 |
| 8 | 7.412738  | -1.364915 | -0.904269 |
| 8 | 7.082687  | -3.505650 | -1.456462 |
| 1 | 8.034572  | -3.492291 | -1.238470 |
| 6 | 6.142382  | 1.996633  | 0.371850  |
| 8 | 7.178510  | 2.222113  | 0.961819  |
| 8 | 5.997199  | 0.974407  | -0.501410 |
| 1 | 6.786908  | 0.386593  | -0.510701 |
| 6 | 1.025068  | 3.038211  | 2.973566  |
| 6 | 0.425201  | 4.382446  | 3.355736  |
| 1 | 1.744735  | 3.141676  | 2.154810  |
| 1 | 1.549377  | 2.574907  | 3.817528  |
| 1 | 1.214472  | 5.073131  | 3.677481  |
| 1 | -0.100767 | 4.823853  | 2.502803  |
| 1 | -0.293876 | 4.269056  | 4.174145  |

-----  
 $^3\text{C}_{\text{Fe}(\text{cys})}$   
 -----

|                                    |                             |                  |
|------------------------------------|-----------------------------|------------------|
| Number of imaginary frequencies: 0 | Electronic energy:          | HF=-3157.9926334 |
| Zero-point correction=             | 0.852497 (Hartree/Particle) |                  |
| Thermal correction to Energy=      | 0.916248                    |                  |
| Thermal correction to Enthalpy=    | 0.917192                    |                  |



|                                              |              |
|----------------------------------------------|--------------|
| Thermal correction to Gibbs Free Energy=     | 0.746021     |
| Sum of electronic and zero-point Energies=   | -3157.140137 |
| Sum of electronic and thermal Energies=      | -3157.076385 |
| Sum of electronic and thermal Enthalpies=    | -3157.075441 |
| Sum of electronic and thermal Free Energies= | -3157.246612 |

.....  
Cartesian Coordinates  
.....

|    |           |           |           |
|----|-----------|-----------|-----------|
| 6  | -4.896973 | 0.227015  | 3.000746  |
| 6  | -4.232421 | -0.986212 | 2.854979  |
| 6  | -2.948470 | -1.011882 | 2.301805  |
| 6  | -2.288402 | 0.154620  | 1.892158  |
| 6  | -2.976228 | 1.381446  | 2.081778  |
| 6  | -4.267744 | 1.415728  | 2.613938  |
| 6  | -0.928808 | 0.129566  | 1.308883  |
| 7  | 1.620863  | 4.059328  | 1.989943  |
| 7  | 0.637974  | 4.506429  | 1.754785  |
| 8  | -2.281634 | 2.506461  | 1.719503  |
| 6  | -2.935412 | 3.753823  | 1.794905  |
| 26 | -0.603745 | -0.441462 | -0.649435 |
| 7  | -2.234955 | 0.624813  | -1.207882 |
| 6  | -2.301524 | 1.948066  | -1.513927 |
| 6  | -3.673456 | 2.329123  | -1.839280 |
| 6  | -4.425587 | 1.178117  | -1.723096 |
| 6  | -3.505306 | 0.126801  | -1.337793 |
| 6  | -1.203585 | 2.803383  | -1.588086 |
| 6  | 0.117642  | 2.425494  | -1.397390 |
| 7  | 0.533118  | 1.179575  | -1.025820 |
| 6  | 1.894946  | 1.207449  | -1.038223 |
| 6  | 2.375001  | 2.529869  | -1.431619 |
| 6  | 1.263499  | 3.295730  | -1.640882 |
| 6  | -3.877453 | -1.199093 | -1.141820 |
| 6  | -3.050463 | -2.237533 | -0.723729 |
| 7  | -1.734603 | -2.101570 | -0.385321 |
| 6  | -1.336911 | -3.298611 | 0.145051  |
| 6  | -2.433528 | -4.240505 | 0.148946  |
| 6  | -3.503836 | -3.597032 | -0.437131 |
| 6  | 2.729010  | 0.157525  | -0.680385 |
| 6  | 2.314068  | -1.078422 | -0.197785 |
| 7  | 1.022669  | -1.503960 | -0.119511 |
| 6  | 1.057681  | -2.761070 | 0.422211  |
| 6  | 2.426754  | -3.142141 | 0.731419  |
| 6  | 3.214324  | -2.093881 | 0.333497  |
| 6  | -0.043965 | -3.591013 | 0.579483  |
| 6  | 0.132720  | 0.577292  | 2.194445  |
| 8  | -0.269538 | 0.620626  | 3.529312  |
| 8  | 1.287988  | 0.883819  | 1.912073  |
| 1  | 0.127702  | -4.574633 | 1.004898  |
| 1  | -4.923045 | -1.441567 | -1.279455 |
| 1  | -1.384771 | 3.828900  | -1.890453 |

|    |           |           |           |
|----|-----------|-----------|-----------|
| 1  | 3.794826  | 0.340171  | -0.717308 |
| 1  | -2.430594 | -1.958245 | 2.191814  |
| 1  | -4.707668 | -1.915854 | 3.159481  |
| 1  | -4.787474 | 2.359584  | 2.739663  |
| 1  | -5.902127 | 0.263902  | 3.415574  |
| 1  | -2.214513 | 4.490742  | 1.435941  |
| 1  | -3.831955 | 3.780561  | 1.159694  |
| 1  | -3.222601 | 4.004789  | 2.827370  |
| 6  | 0.024537  | -2.801575 | -3.051832 |
| 1  | -0.830325 | -3.393189 | -2.706613 |
| 1  | 0.219489  | -3.054826 | -4.100557 |
| 1  | 0.900895  | -3.083546 | -2.457960 |
| 16 | -0.308338 | -1.003113 | -2.937565 |
| 6  | 1.173109  | 4.735363  | -2.050262 |
| 1  | 2.166123  | 5.168329  | -2.210838 |
| 1  | 0.605261  | 4.859414  | -2.981937 |
| 1  | 0.670391  | 5.343472  | -1.285636 |
| 6  | 2.832506  | -4.444504 | 1.355285  |
| 1  | 2.296500  | -4.627293 | 2.295758  |
| 1  | 2.619042  | -5.297177 | 0.695830  |
| 1  | 3.904427  | -4.468003 | 1.578670  |
| 6  | -2.351110 | -5.658755 | 0.630461  |
| 1  | -1.757812 | -6.287666 | -0.048267 |
| 1  | -1.880101 | -5.722903 | 1.619525  |
| 1  | -3.343154 | -6.115666 | 0.706934  |
| 6  | -5.904371 | 1.016847  | -1.901566 |
| 1  | -6.177679 | 0.799456  | -2.944651 |
| 1  | -6.297146 | 0.201607  | -1.285485 |
| 1  | -6.430411 | 1.935213  | -1.616486 |
| 6  | -4.087075 | 3.683585  | -2.176327 |
| 6  | -5.175816 | 4.072136  | -2.864451 |
| 1  | -3.423644 | 4.472333  | -1.820275 |
| 1  | -5.379549 | 5.126972  | -3.029630 |
| 1  | -5.876301 | 3.369019  | -3.302863 |
| 6  | -4.809534 | -4.189433 | -0.706368 |
| 6  | -5.641355 | -3.919682 | -1.726132 |
| 1  | -5.117003 | -4.967647 | -0.005184 |
| 1  | -6.593664 | -4.435537 | -1.819190 |
| 1  | -5.394304 | -3.203447 | -2.503532 |
| 6  | 4.705018  | -1.954502 | 0.460599  |
| 6  | 5.468440  | -2.160706 | -0.882856 |
| 1  | 5.082545  | -2.683388 | 1.187678  |
| 1  | 4.961369  | -0.961142 | 0.845151  |
| 1  | 5.219310  | -3.138221 | -1.303354 |
| 1  | 5.171879  | -1.383108 | -1.590747 |
| 6  | 3.827521  | 2.896550  | -1.562838 |
| 6  | 4.582817  | 3.003502  | -0.201982 |
| 1  | 3.924830  | 3.848406  | -2.096933 |
| 1  | 4.327120  | 2.147036  | -2.184965 |
| 1  | 4.691013  | 4.042074  | 0.120683  |

|   |           |           |           |
|---|-----------|-----------|-----------|
| 1 | 3.996355  | 2.491356  | 0.571954  |
| 6 | 6.956778  | -2.068058 | -0.666254 |
| 8 | 7.617161  | -1.046892 | -0.548651 |
| 8 | 7.546091  | -3.280976 | -0.552009 |
| 1 | 8.488302  | -3.102866 | -0.366656 |
| 6 | 5.961104  | 2.368681  | -0.169639 |
| 8 | 6.942173  | 2.834100  | 0.372755  |
| 8 | 5.960343  | 1.161063  | -0.779185 |
| 1 | 6.803118  | 0.676722  | -0.625046 |
| 6 | 0.731097  | 1.028395  | 4.457338  |
| 6 | 0.120398  | 0.953285  | 5.849014  |
| 1 | 1.066973  | 2.047043  | 4.224194  |
| 1 | 1.611068  | 0.378653  | 4.369436  |
| 1 | 0.851625  | 1.263956  | 6.605813  |
| 1 | -0.755927 | 1.606380  | 5.923065  |
| 1 | -0.201596 | -0.068941 | 6.075776  |

---

**<sup>3</sup>TS(C-D)<sub>Fe(cys)</sub>**

---

Number of imaginary frequencies: 3    Electronic energy:    HF=-3048.4413124  
Zero-point correction=                    0.841704 (Hartree/Particle)  
Thermal correction to Energy=            0.898673  
Thermal correction to Enthalpy=         0.899617  
Thermal correction to Gibbs Free Energy= 0.748908  
Sum of electronic and zero-point Energies= -3047.599609  
Sum of electronic and thermal Energies= -3047.542639  
Sum of electronic and thermal Enthalpies= -3047.541695  
Sum of electronic and thermal Free Energies= -3047.692405

.....  
Cartesian Coordinates

.....

|    |           |           |           |
|----|-----------|-----------|-----------|
| 6  | 1.093667  | -3.222517 | 3.821392  |
| 6  | 1.803980  | -2.079578 | 3.445898  |
| 6  | 1.165479  | -1.047280 | 2.755815  |
| 6  | -0.195917 | -1.118909 | 2.408431  |
| 6  | -0.897572 | -2.270962 | 2.841697  |
| 6  | -0.268313 | -3.309196 | 3.526563  |
| 6  | -0.948335 | -0.077148 | 1.659935  |
| 8  | -2.246034 | -2.427031 | 2.577510  |
| 6  | -2.987935 | -1.246452 | 2.527183  |
| 26 | -0.748416 | -0.067513 | -0.575100 |
| 7  | -2.486159 | 0.978763  | -0.704077 |
| 6  | -2.650282 | 2.328219  | -0.740484 |
| 6  | -4.063451 | 2.672550  | -0.870777 |
| 6  | -4.743859 | 1.473809  | -0.906880 |
| 6  | -3.738418 | 0.433159  | -0.819574 |
| 6  | -1.612621 | 3.256894  | -0.705460 |
| 6  | -0.261810 | 2.950031  | -0.627636 |
| 7  | 0.260045  | 1.689576  | -0.555624 |
| 6  | 1.616806  | 1.838432  | -0.551186 |

|    |           |           |           |
|----|-----------|-----------|-----------|
| 6  | 1.979669  | 3.251992  | -0.607129 |
| 6  | 0.801033  | 3.944308  | -0.648693 |
| 6  | -4.024514 | -0.925732 | -0.885551 |
| 6  | -3.105213 | -1.970036 | -0.841007 |
| 7  | -1.761233 | -1.825869 | -0.642778 |
| 6  | -1.242894 | -3.090205 | -0.544608 |
| 6  | -2.288212 | -4.079593 | -0.673830 |
| 6  | -3.457185 | -3.384393 | -0.895227 |
| 6  | 2.533706  | 0.797789  | -0.503716 |
| 6  | 2.233046  | -0.559783 | -0.436673 |
| 7  | 0.979527  | -1.093760 | -0.459628 |
| 6  | 1.137487  | -2.451521 | -0.357506 |
| 6  | 2.544729  | -2.794446 | -0.246269 |
| 6  | 3.231876  | -1.611724 | -0.299230 |
| 6  | 0.110149  | -3.380846 | -0.382158 |
| 6  | -0.790335 | 1.274535  | 2.222511  |
| 8  | -2.005720 | 1.913553  | 2.349079  |
| 8  | 0.240840  | 1.826057  | 2.582909  |
| 1  | 0.389881  | -4.423990 | -0.288082 |
| 1  | -5.066848 | -1.205205 | -0.970254 |
| 1  | -1.875113 | 4.306076  | -0.781360 |
| 1  | 3.581444  | 1.065153  | -0.516862 |
| 1  | 1.716573  | -0.159476 | 2.470423  |
| 1  | 2.860667  | -1.987721 | 3.687210  |
| 1  | -0.864316 | -4.166413 | 3.828769  |
| 1  | 1.585731  | -4.031253 | 4.357852  |
| 1  | -3.087198 | -0.734014 | 3.489913  |
| 1  | -2.068697 | -0.417750 | 1.805458  |
| 1  | -3.906010 | -1.396490 | 1.966179  |
| 6  | -0.189745 | -1.644115 | -3.560499 |
| 1  | -0.944953 | -2.392218 | -3.297891 |
| 1  | -0.122789 | -1.588043 | -4.653396 |
| 1  | 0.777591  | -1.976352 | -3.169422 |
| 16 | -0.636277 | 0.016880  | -2.929497 |
| 6  | 0.571633  | 5.425168  | -0.713773 |
| 1  | 1.514488  | 5.981127  | -0.719031 |
| 1  | 0.017069  | 5.711229  | -1.617554 |
| 1  | -0.011520 | 5.781283  | 0.146075  |
| 6  | 3.072286  | -4.186032 | -0.063928 |
| 1  | 2.780005  | -4.846196 | -0.891511 |
| 1  | 4.165807  | -4.198889 | -0.008056 |
| 1  | 2.688069  | -4.634767 | 0.861252  |
| 6  | -2.128968 | -5.570903 | -0.612559 |
| 1  | -2.636477 | -5.992144 | 0.266879  |
| 1  | -2.558116 | -6.059571 | -1.496450 |
| 1  | -1.079370 | -5.871381 | -0.550784 |
| 6  | -6.223461 | 1.250476  | -0.984700 |
| 1  | -6.584714 | 1.205315  | -2.022650 |
| 1  | -6.516627 | 0.313328  | -0.499883 |
| 1  | -6.764010 | 2.066727  | -0.491935 |

|   |           |           |           |
|---|-----------|-----------|-----------|
| 6 | -4.574992 | 4.035382  | -0.911307 |
| 6 | -5.737226 | 4.466896  | -1.432928 |
| 1 | -3.928041 | 4.788571  | -0.460934 |
| 1 | -6.012668 | 5.516945  | -1.379789 |
| 1 | -6.431642 | 3.809024  | -1.945204 |
| 6 | -4.760129 | -3.997920 | -1.128368 |
| 6 | -5.760622 | -3.550998 | -1.905962 |
| 1 | -4.906272 | -4.958091 | -0.629202 |
| 1 | -6.687428 | -4.111628 | -1.997649 |
| 1 | -5.681607 | -2.638506 | -2.488771 |
| 6 | 4.712477  | -1.394040 | -0.178761 |
| 6 | 5.397149  | -1.090796 | -1.546999 |
| 1 | 5.182942  | -2.286929 | 0.248860  |
| 1 | 4.926762  | -0.567756 | 0.509257  |
| 1 | 5.216917  | -1.916329 | -2.240302 |
| 1 | 4.978807  | -0.175166 | -1.972852 |
| 6 | 3.373867  | 3.818095  | -0.649367 |
| 6 | 4.227114  | 3.625465  | 0.640640  |
| 1 | 3.296747  | 4.892183  | -0.846921 |
| 1 | 3.929405  | 3.401567  | -1.496670 |
| 1 | 4.807912  | 4.541440  | 0.821296  |
| 1 | 3.596969  | 3.465689  | 1.518554  |
| 6 | 6.876647  | -0.895623 | -1.359989 |
| 8 | 7.432153  | 0.129903  | -0.993699 |
| 8 | 7.592477  | -2.018788 | -1.586869 |
| 1 | 8.519698  | -1.793127 | -1.379188 |
| 6 | 5.247929  | 2.500858  | 0.605354  |
| 8 | 5.525472  | 1.787562  | 1.549865  |
| 8 | 5.855966  | 2.395384  | -0.595642 |
| 1 | 6.475639  | 1.624227  | -0.576819 |
| 6 | -1.959767 | 3.240321  | 2.878258  |
| 6 | -3.393551 | 3.684784  | 3.122770  |
| 1 | -1.454199 | 3.899825  | 2.162375  |
| 1 | -1.370004 | 3.248387  | 3.801871  |
| 1 | -3.412825 | 4.706042  | 3.523562  |
| 1 | -3.970598 | 3.663721  | 2.192579  |
| 1 | -3.886787 | 3.022213  | 3.842829  |

---

**<sup>3</sup>D<sub>Fe(cys)</sub>**

---

Number of imaginary frequencies: 0    Electronic energy:    HF=-3048.4691061  
Zero-point correction=                    0.844884 (Hartree/Particle)  
Thermal correction to Energy=            0.904571  
Thermal correction to Enthalpy=         0.905516  
Thermal correction to Gibbs Free Energy= 0.747890  
Sum of electronic and zero-point Energies= -3047.624222  
Sum of electronic and thermal Energies= -3047.564535  
Sum of electronic and thermal Enthalpies= -3047.563590  
Sum of electronic and thermal Free Energies= -3047.721216

---

Cartesian Coordinates

|    |           |           |           |
|----|-----------|-----------|-----------|
| 6  | 2.140429  | 2.790030  | 3.315767  |
| 6  | 0.887531  | 3.276266  | 2.935003  |
| 6  | -0.080802 | 2.413072  | 2.426697  |
| 6  | 0.139387  | 1.024436  | 2.294996  |
| 6  | 1.403106  | 0.561502  | 2.740363  |
| 6  | 2.396150  | 1.422027  | 3.213082  |
| 6  | -0.872326 | 0.083818  | 1.770172  |
| 8  | 1.637341  | -0.804336 | 2.664942  |
| 6  | 2.368581  | -1.433853 | 3.618251  |
| 26 | -0.841228 | -0.085211 | -0.555986 |
| 7  | -2.421694 | 1.157281  | -0.758542 |
| 6  | -2.409424 | 2.514684  | -0.854905 |
| 6  | -3.766442 | 3.032742  | -0.997692 |
| 6  | -4.595367 | 1.933222  | -0.992527 |
| 6  | -3.733923 | 0.775187  | -0.848266 |
| 6  | -1.260617 | 3.298175  | -0.903082 |
| 6  | 0.040504  | 2.815968  | -0.878568 |
| 7  | 0.391372  | 1.504038  | -0.739953 |
| 6  | 1.753955  | 1.461397  | -0.825378 |
| 6  | 2.298036  | 2.802618  | -1.017189 |
| 6  | 1.223142  | 3.648571  | -1.037944 |
| 6  | -4.197357 | -0.535420 | -0.809171 |
| 6  | -3.423174 | -1.677170 | -0.623281 |
| 7  | -2.075987 | -1.679639 | -0.405606 |
| 6  | -1.729876 | -2.970073 | -0.106701 |
| 6  | -2.892689 | -3.827363 | -0.127308 |
| 6  | -3.957197 | -3.032544 | -0.497765 |
| 6  | 2.525391  | 0.313327  | -0.704117 |
| 6  | 2.052676  | -0.967382 | -0.432884 |
| 7  | 0.739240  | -1.319182 | -0.334911 |
| 6  | 0.717869  | -2.651815 | -0.021351 |
| 6  | 2.069676  | -3.168777 | 0.099122  |
| 6  | 2.906361  | -2.115918 | -0.162116 |
| 6  | -0.430696 | -3.419130 | 0.117215  |
| 6  | -2.255269 | 0.331535  | 2.190687  |
| 8  | -2.912053 | -0.852436 | 2.464056  |
| 8  | -2.835243 | 1.401826  | 2.334078  |
| 1  | -0.303019 | -4.468522 | 0.362360  |
| 1  | -5.266514 | -0.682043 | -0.891312 |
| 1  | -1.389031 | 4.368142  | -1.022272 |
| 1  | 3.597077  | 0.431747  | -0.793104 |
| 1  | -1.049797 | 2.794938  | 2.133363  |
| 1  | 0.664133  | 4.337977  | 3.020949  |
| 1  | 3.376300  | 1.024974  | 3.457334  |
| 1  | 2.913554  | 3.459555  | 3.686371  |
| 1  | 2.776632  | -0.855278 | 4.439255  |
| 1  | -0.600326 | -0.951967 | 1.938542  |
| 1  | 2.820060  | -2.357760 | 3.279762  |

|    |           |           |           |
|----|-----------|-----------|-----------|
| 6  | -0.592805 | -2.054339 | -3.320173 |
| 1  | -1.458332 | -2.635198 | -2.984923 |
| 1  | -0.516360 | -2.143604 | -4.410257 |
| 1  | 0.309085  | -2.484876 | -2.872479 |
| 16 | -0.766948 | -0.278240 | -2.903707 |
| 6  | 1.192943  | 5.140611  | -1.184319 |
| 1  | 2.195895  | 5.553214  | -1.333454 |
| 1  | 0.578446  | 5.453254  | -2.038852 |
| 1  | 0.771310  | 5.622199  | -0.291737 |
| 6  | 2.415835  | -4.586220 | 0.447898  |
| 1  | 2.076770  | -5.290586 | -0.324195 |
| 1  | 3.496921  | -4.722106 | 0.558331  |
| 1  | 1.946932  | -4.897142 | 1.390565  |
| 6  | -2.878808 | -5.304902 | 0.130073  |
| 1  | -2.350580 | -5.546036 | 1.061118  |
| 1  | -3.893163 | -5.708562 | 0.211206  |
| 1  | -2.375752 | -5.856258 | -0.676782 |
| 6  | -6.091505 | 1.901344  | -1.063288 |
| 1  | -6.459045 | 1.814909  | -2.096410 |
| 1  | -6.503696 | 1.055902  | -0.502098 |
| 1  | -6.516007 | 2.820984  | -0.645493 |
| 6  | -4.098419 | 4.448480  | -1.079722 |
| 6  | -5.171594 | 5.007256  | -1.665475 |
| 1  | -3.385926 | 5.121675  | -0.602155 |
| 1  | -5.322812 | 6.083293  | -1.638085 |
| 1  | -5.913468 | 4.426327  | -2.204322 |
| 6  | -5.324403 | -3.491356 | -0.722008 |
| 6  | -6.222406 | -3.012139 | -1.598887 |
| 1  | -5.626200 | -4.351835 | -0.121966 |
| 1  | -7.215109 | -3.448789 | -1.672822 |
| 1  | -5.994251 | -2.197713 | -2.279237 |
| 6  | 4.406426  | -2.091201 | -0.112506 |
| 6  | 5.068025  | -2.068520 | -1.523401 |
| 1  | 4.771904  | -2.976354 | 0.421666  |
| 1  | 4.756536  | -1.220049 | 0.453498  |
| 1  | 4.755374  | -2.944099 | -2.097493 |
| 1  | 4.754821  | -1.168304 | -2.059654 |
| 6  | 3.750891  | 3.167124  | -1.166112 |
| 6  | 4.614941  | 3.045138  | 0.126002  |
| 1  | 3.805452  | 4.205533  | -1.509393 |
| 1  | 4.219017  | 2.569223  | -1.955493 |
| 1  | 5.348026  | 3.864786  | 0.136706  |
| 1  | 4.002755  | 3.140758  | 1.025643  |
| 6  | 6.566721  | -2.046251 | -1.396462 |
| 8  | 7.248922  | -1.085131 | -1.072440 |
| 8  | 7.140339  | -3.247529 | -1.627155 |
| 1  | 8.095947  | -3.123781 | -1.467293 |
| 6  | 5.431874  | 1.772796  | 0.262417  |
| 8  | 5.599382  | 1.157871  | 1.298234  |
| 8  | 6.003731  | 1.406898  | -0.905485 |

|   |           |           |           |
|---|-----------|-----------|-----------|
| 1 | 6.497820  | 0.560082  | -0.777092 |
| 6 | -4.275345 | -0.723229 | 2.869825  |
| 6 | -4.756749 | -2.101355 | 3.296822  |
| 1 | -4.871991 | -0.334837 | 2.035614  |
| 1 | -4.349481 | 0.001580  | 3.688684  |
| 1 | -5.806834 | -2.057298 | 3.612176  |
| 1 | -4.670393 | -2.811406 | 2.468215  |
| 1 | -4.158993 | -2.478319 | 4.134462  |

-----  
<sup>3</sup>TS(D-E)<sub>Fe(cys)</sub>  
 -----

Number of imaginary frequencies: 1    Electronic energy:    HF=-3048.467686  
 Zero-point correction=                    0.844155 (Hartree/Particle)  
 Thermal correction to Energy=            0.903421  
 Thermal correction to Enthalpy=         0.904365  
 Thermal correction to Gibbs Free Energy= 0.747042  
 Sum of electronic and zero-point Energies= -3047.623531  
 Sum of electronic and thermal Energies= -3047.564265  
 Sum of electronic and thermal Enthalpies= -3047.563321  
 Sum of electronic and thermal Free Energies= -3047.720644

-----  
 Cartesian Coordinates  
 -----

|    |           |           |           |
|----|-----------|-----------|-----------|
| 6  | -1.861691 | -3.769805 | 2.973118  |
| 6  | -0.529559 | -4.037216 | 2.632711  |
| 6  | 0.368540  | -2.999162 | 2.423872  |
| 6  | -0.016871 | -1.634382 | 2.534146  |
| 6  | -1.383740 | -1.401021 | 2.884660  |
| 6  | -2.283949 | -2.444950 | 3.103873  |
| 6  | 0.885072  | -0.536143 | 2.356892  |
| 8  | -1.741255 | -0.084430 | 3.055385  |
| 6  | -3.039892 | 0.292050  | 3.168290  |
| 26 | 0.825937  | 0.246411  | -0.705511 |
| 7  | 2.394272  | -0.999918 | -0.944759 |
| 6  | 2.365781  | -2.349488 | -1.139589 |
| 6  | 3.714962  | -2.873754 | -1.322334 |
| 6  | 4.558817  | -1.789040 | -1.234632 |
| 6  | 3.713982  | -0.633889 | -1.001543 |
| 6  | 1.207284  | -3.112868 | -1.230315 |
| 6  | -0.088285 | -2.623099 | -1.146446 |
| 7  | -0.423803 | -1.318510 | -0.911611 |
| 6  | -1.789307 | -1.261801 | -0.971459 |
| 6  | -2.346338 | -2.579260 | -1.261146 |
| 6  | -1.279723 | -3.431881 | -1.349383 |
| 6  | 4.194938  | 0.661423  | -0.845278 |
| 6  | 3.436253  | 1.784553  | -0.531299 |
| 7  | 2.088110  | 1.775392  | -0.306404 |
| 6  | 1.763127  | 3.027748  | 0.147377  |
| 6  | 2.936476  | 3.868369  | 0.215103  |
| 6  | 3.987996  | 3.109437  | -0.253889 |



|    |           |           |           |
|----|-----------|-----------|-----------|
| 6  | -2.545745 | -0.122777 | -0.730068 |
| 6  | -2.052307 | 1.114583  | -0.325443 |
| 7  | -0.729512 | 1.433553  | -0.208757 |
| 6  | -0.686059 | 2.724672  | 0.251733  |
| 6  | -2.027636 | 3.242214  | 0.451368  |
| 6  | -2.884090 | 2.237887  | 0.081388  |
| 6  | 0.474533  | 3.461267  | 0.445420  |
| 6  | 2.318419  | -0.664684 | 2.455219  |
| 8  | 2.902491  | 0.562608  | 2.711870  |
| 8  | 3.008713  | -1.681588 | 2.385675  |
| 1  | 0.364353  | 4.478374  | 0.807602  |
| 1  | 5.265575  | 0.802539  | -0.918843 |
| 1  | 1.321795  | -4.173304 | -1.424720 |
| 1  | -3.619867 | -0.218047 | -0.820166 |
| 1  | 1.402022  | -3.202289 | 2.174901  |
| 1  | -0.188453 | -5.066306 | 2.538671  |
| 1  | -3.299626 | -2.222180 | 3.411933  |
| 1  | -2.563035 | -4.580176 | 3.158034  |
| 1  | -3.796907 | -0.271872 | 2.631564  |
| 1  | 0.493180  | 0.464063  | 2.479135  |
| 1  | -3.132844 | 1.363798  | 3.298505  |
| 6  | 0.519650  | 2.547349  | -3.231874 |
| 1  | 1.394729  | 3.074115  | -2.836198 |
| 1  | 0.420034  | 2.796878  | -4.295192 |
| 1  | -0.370992 | 2.912375  | -2.708585 |
| 16 | 0.695462  | 0.728519  | -3.070872 |
| 6  | -1.265792 | -4.911684 | -1.589708 |
| 1  | -0.638391 | -5.179308 | -2.449887 |
| 1  | -0.868880 | -5.450620 | -0.718959 |
| 1  | -2.270649 | -5.300601 | -1.783265 |
| 6  | -2.348529 | 4.614777  | 0.964598  |
| 1  | -2.006548 | 5.398337  | 0.274568  |
| 1  | -3.426093 | 4.752115  | 1.103381  |
| 1  | -1.865541 | 4.808592  | 1.931259  |
| 6  | 2.943940  | 5.305459  | 0.644776  |
| 1  | 3.963953  | 5.689895  | 0.745002  |
| 1  | 2.425490  | 5.950543  | -0.078379 |
| 1  | 2.442251  | 5.439718  | 1.611490  |
| 6  | 6.055432  | -1.773484 | -1.298823 |
| 1  | 6.427060  | -1.606770 | -2.320501 |
| 1  | 6.477292  | -0.983587 | -0.668276 |
| 1  | 6.464942  | -2.730631 | -0.957680 |
| 6  | 4.029190  | -4.284058 | -1.506986 |
| 6  | 5.091220  | -4.810375 | -2.140769 |
| 1  | 3.312901  | -4.981735 | -1.072197 |
| 1  | 5.231224  | -5.887035 | -2.191786 |
| 1  | 5.834815  | -4.199575 | -2.643058 |
| 6  | 5.361383  | 3.571593  | -0.430257 |
| 6  | 6.244056  | 3.188294  | -1.367436 |
| 1  | 5.682059  | 4.345794  | 0.269103  |

|   |           |           |           |
|---|-----------|-----------|-----------|
| 1 | 7.243915  | 3.613699  | -1.396984 |
| 1 | 5.996002  | 2.467381  | -2.140172 |
| 6 | -4.384634 | 2.237734  | 0.123033  |
| 6 | -5.035342 | 2.379367  | -1.285643 |
| 1 | -4.737619 | 3.066749  | 0.747990  |
| 1 | -4.756265 | 1.317744  | 0.588369  |
| 1 | -4.718062 | 3.313694  | -1.754789 |
| 1 | -4.717661 | 1.546307  | -1.919458 |
| 6 | -3.800858 | -2.921340 | -1.443022 |
| 6 | -4.670606 | -2.916456 | -0.149345 |
| 1 | -3.859112 | -3.923713 | -1.879620 |
| 1 | -4.264360 | -2.251599 | -2.175560 |
| 1 | -5.424399 | -3.712718 | -0.231218 |
| 1 | -4.066345 | -3.124562 | 0.736515  |
| 6 | -6.535177 | 2.342561  | -1.174582 |
| 8 | -7.216135 | 1.354713  | -0.939259 |
| 8 | -7.112081 | 3.555899  | -1.310030 |
| 1 | -8.069198 | 3.415770  | -1.174095 |
| 6 | -5.453472 | -1.643598 | 0.111301  |
| 8 | -5.576307 | -1.107199 | 1.198054  |
| 8 | -6.047020 | -1.173312 | -1.003523 |
| 1 | -6.508546 | -0.322236 | -0.799233 |
| 6 | 4.318117  | 0.544031  | 2.893631  |
| 6 | 4.729064  | 1.909391  | 3.423091  |
| 1 | 4.809152  | 0.326140  | 1.937625  |
| 1 | 4.589765  | -0.257518 | 3.590226  |
| 1 | 5.815404  | 1.947631  | 3.572629  |
| 1 | 4.447476  | 2.695431  | 2.715415  |
| 1 | 4.239717  | 2.117298  | 4.381504  |

---

$^5\text{A}_{\text{Fe}(\text{cys})}$

---

Number of imaginary frequencies: 0    Electronic energy:    HF=-2396.4990185  
Zero-point correction=                    0.631875 (Hartree/Particle)  
Thermal correction to Energy=            0.678217  
Thermal correction to Enthalpy=         0.679161  
Thermal correction to Gibbs Free Energy= 0.544324  
Sum of electronic and zero-point Energies= -2395.867143  
Sum of electronic and thermal Energies= -2395.820801  
Sum of electronic and thermal Enthalpies= -2395.819857  
Sum of electronic and thermal Free Energies= -2395.954695

.....  
Cartesian Coordinates

.....  
26    1.047005   -0.125685   0.481423  
7    2.428775   -1.543539   -0.405257  
6    2.153084   -2.862245   -0.630727  
6    3.380184   -3.593405   -0.887069  
6    4.404378   -2.666704   -0.855796

|    |           |           |           |
|----|-----------|-----------|-----------|
| 6  | 3.776008  | -1.380775 | -0.530639 |
| 6  | 0.868149  | -3.426937 | -0.651915 |
| 6  | -0.355242 | -2.765223 | -0.514037 |
| 7  | -0.497529 | -1.425516 | -0.291053 |
| 6  | -1.833214 | -1.162611 | -0.268975 |
| 6  | -2.592077 | -2.397657 | -0.467124 |
| 6  | -1.666959 | -3.399015 | -0.619859 |
| 6  | -2.393824 | 0.112586  | -0.117605 |
| 6  | -1.713870 | 1.330030  | 0.018667  |
| 7  | -0.359649 | 1.465925  | 0.077969  |
| 6  | -0.094655 | 2.800227  | 0.187390  |
| 6  | -1.341522 | 3.560564  | 0.211509  |
| 6  | -2.354721 | 2.642634  | 0.103322  |
| 6  | 1.183236  | 3.364373  | 0.241570  |
| 6  | 2.413074  | 2.698748  | 0.132623  |
| 6  | 3.728592  | 3.345512  | 0.149426  |
| 6  | 4.654303  | 2.330120  | -0.004272 |
| 6  | 3.891994  | 1.095859  | -0.110409 |
| 7  | 2.553032  | 1.354859  | -0.010728 |
| 6  | 4.450668  | -0.169429 | -0.334794 |
| 1  | 0.818758  | -4.497871 | -0.829906 |
| 1  | 5.532459  | -0.219171 | -0.368851 |
| 1  | 1.223137  | 4.442679  | 0.363026  |
| 1  | -3.479280 | 0.166653  | -0.130911 |
| 16 | 1.089438  | -0.419469 | 2.874761  |
| 6  | 1.328647  | -2.239862 | 3.063727  |
| 1  | 2.281595  | -2.565004 | 2.632709  |
| 1  | 1.330317  | -2.491777 | 4.130521  |
| 1  | 0.523727  | -2.803332 | 2.579464  |
| 6  | -1.441197 | 5.053736  | 0.318928  |
| 1  | -0.890774 | 5.432589  | 1.189932  |
| 1  | -1.023206 | 5.557069  | -0.564183 |
| 1  | -2.481161 | 5.382349  | 0.420700  |
| 6  | -1.903612 | -4.861910 | -0.854627 |
| 1  | -1.376977 | -5.218985 | -1.749667 |
| 1  | -1.548088 | -5.472688 | -0.013219 |
| 1  | -2.967918 | -5.082114 | -0.991203 |
| 6  | 3.467990  | -5.058727 | -1.196220 |
| 1  | 2.903414  | -5.657626 | -0.470354 |
| 1  | 3.059084  | -5.292247 | -2.189620 |
| 1  | 4.503701  | -5.413919 | -1.184157 |
| 6  | 6.144440  | 2.451088  | -0.107590 |
| 1  | 6.631874  | 2.425948  | 0.877971  |
| 1  | 6.575671  | 1.635781  | -0.698451 |
| 1  | 6.428372  | 3.398434  | -0.581265 |
| 6  | 5.810791  | -2.952513 | -1.120808 |
| 6  | 6.723688  | -2.156403 | -1.702280 |
| 1  | 6.139416  | -3.953282 | -0.833095 |
| 1  | 7.747917  | -2.492934 | -1.841551 |
| 1  | 6.479988  | -1.166243 | -2.074237 |

|   |           |           |           |
|---|-----------|-----------|-----------|
| 6 | 3.938966  | 4.781855  | 0.256601  |
| 6 | 5.034583  | 5.429426  | 0.692240  |
| 1 | 3.094978  | 5.398040  | -0.055595 |
| 1 | 5.067579  | 6.515843  | 0.707424  |
| 1 | 5.910507  | 4.912782  | 1.070769  |
| 6 | -4.090431 | -2.511253 | -0.456481 |
| 6 | -4.667266 | -2.520659 | 0.970382  |
| 1 | -4.412152 | -3.423937 | -0.970612 |
| 1 | -4.546487 | -1.683375 | -1.013023 |
| 1 | -4.248994 | -3.351221 | 1.553538  |
| 1 | -4.376700 | -1.614745 | 1.516634  |
| 6 | -3.833470 | 2.898974  | 0.022612  |
| 6 | -4.353628 | 2.877196  | -1.425718 |
| 1 | -4.081194 | 3.868350  | 0.468955  |
| 1 | -4.388463 | 2.155102  | 0.606917  |
| 1 | -3.826433 | 3.621265  | -2.037430 |
| 1 | -4.143740 | 1.912328  | -1.903294 |
| 6 | -6.173200 | -2.634991 | 1.004257  |
| 8 | -6.914111 | -2.728928 | 0.048042  |
| 8 | -6.650215 | -2.626378 | 2.278611  |
| 1 | -7.619814 | -2.695021 | 2.193615  |
| 6 | -5.835363 | 3.150934  | -1.536248 |
| 8 | -6.591163 | 3.427705  | -0.629148 |
| 8 | -6.268537 | 3.060004  | -2.824056 |
| 1 | -7.225599 | 3.246986  | -2.789179 |

---

**<sup>5</sup>B<sub>Fe(cys)</sub>**

---

Number of imaginary frequencies: 0    Electronic energy:    HF=-3158.0180389  
Zero-point correction=                    0.854018 (Hartree/Particle)  
Thermal correction to Energy=            0.917626  
Thermal correction to Enthalpy=        0.918570  
Thermal correction to Gibbs Free Energy=    0.742868  
Sum of electronic and zero-point Energies=    -3157.164021  
Sum of electronic and thermal Energies=    -3157.100413  
Sum of electronic and thermal Enthalpies=   -3157.099468  
Sum of electronic and thermal Free Energies=   -3157.275171

.....  
Cartesian Coordinates

.....

|   |          |           |           |
|---|----------|-----------|-----------|
| 6 | 8.240614 | -3.950356 | -0.761117 |
| 6 | 7.104514 | -4.442470 | -1.397799 |
| 6 | 6.058822 | -3.577984 | -1.723428 |
| 6 | 6.115863 | -2.211258 | -1.410876 |
| 6 | 7.270446 | -1.731571 | -0.741336 |
| 6 | 8.325254 | -2.594777 | -0.433479 |
| 6 | 4.995924 | -1.317735 | -1.766524 |
| 7 | 5.234704 | -0.059387 | -2.076084 |
| 7 | 5.426540 | 1.024902  | -2.357125 |

|    |           |           |           |
|----|-----------|-----------|-----------|
| 8  | 7.265118  | -0.401394 | -0.422669 |
| 6  | 8.369325  | 0.145183  | 0.276487  |
| 26 | -1.040367 | 1.195065  | 1.085284  |
| 7  | -0.207356 | 3.014877  | 0.246051  |
| 6  | -0.915354 | 4.055609  | -0.268171 |
| 6  | -0.057546 | 5.237145  | -0.394083 |
| 6  | 1.195219  | 4.848011  | 0.042745  |
| 6  | 1.074801  | 3.453894  | 0.437964  |
| 6  | -2.269262 | 3.998978  | -0.633181 |
| 6  | -3.105917 | 2.879890  | -0.609392 |
| 7  | -2.729591 | 1.634489  | -0.198780 |
| 6  | -3.806786 | 0.817884  | -0.364580 |
| 6  | -4.943179 | 1.579460  | -0.888755 |
| 6  | -4.502631 | 2.867531  | -1.045723 |
| 6  | 2.131576  | 2.669861  | 0.920187  |
| 6  | 2.109801  | 1.310855  | 1.256258  |
| 7  | 1.013625  | 0.506557  | 1.148520  |
| 6  | 1.419543  | -0.771389 | 1.414051  |
| 6  | 2.839723  | -0.795458 | 1.716217  |
| 6  | 3.276462  | 0.512828  | 1.649262  |
| 6  | -3.818396 | -0.558819 | -0.112283 |
| 6  | -2.750959 | -1.349757 | 0.331561  |
| 7  | -1.520026 | -0.880478 | 0.674719  |
| 6  | -0.754195 | -1.963264 | 1.005494  |
| 6  | -1.536548 | -3.189482 | 0.879842  |
| 6  | -2.785046 | -2.806351 | 0.454237  |
| 6  | 0.596236  | -1.907263 | 1.365295  |
| 6  | 3.582079  | -1.739736 | -1.854432 |
| 8  | 2.790737  | -0.728046 | -2.246703 |
| 8  | 3.195621  | -2.871019 | -1.610692 |
| 1  | 1.076513  | -2.855217 | 1.590149  |
| 1  | 3.095600  | 3.158651  | 0.997409  |
| 1  | -2.715745 | 4.922411  | -0.989506 |
| 1  | -4.748809 | -1.075901 | -0.313921 |
| 1  | 5.168822  | -3.958062 | -2.208057 |
| 1  | 7.026820  | -5.496373 | -1.649705 |
| 1  | 9.207049  | -2.219262 | 0.073061  |
| 1  | 9.064800  | -4.612728 | -0.509430 |
| 1  | 8.122594  | 1.195228  | 0.442407  |
| 1  | 8.518817  | -0.351199 | 1.244285  |
| 1  | 9.293892  | 0.074453  | -0.312507 |
| 6  | -1.049920 | 0.264889  | 4.293844  |
| 1  | 0.043877  | 0.238543  | 4.244134  |
| 1  | -1.343568 | 0.365681  | 5.344987  |
| 1  | -1.434151 | -0.690333 | 3.920150  |
| 16 | -1.734092 | 1.688031  | 3.337658  |
| 6  | -5.255712 | 4.060941  | -1.554417 |
| 1  | -6.294167 | 3.810136  | -1.795876 |
| 1  | -5.276281 | 4.872126  | -0.814561 |
| 1  | -4.798369 | 4.472499  | -2.464733 |

|   |           |           |           |
|---|-----------|-----------|-----------|
| 6 | -1.019500 | -4.571469 | 1.151349  |
| 1 | -0.113226 | -4.784528 | 0.569768  |
| 1 | -0.756764 | -4.705225 | 2.209666  |
| 1 | -1.759862 | -5.339172 | 0.901295  |
| 6 | 3.633512  | -2.026588 | 2.040907  |
| 1 | 3.236342  | -2.541721 | 2.926058  |
| 1 | 3.612221  | -2.743766 | 1.210223  |
| 1 | 4.681003  | -1.787004 | 2.248404  |
| 6 | 2.455576  | 5.658752  | 0.065840  |
| 1 | 2.572488  | 6.218438  | 1.005522  |
| 1 | 3.343388  | 5.027133  | -0.045132 |
| 1 | 2.461318  | 6.393947  | -0.747436 |
| 6 | -0.493118 | 6.517154  | -0.934221 |
| 6 | 0.037055  | 7.733068  | -0.711743 |
| 1 | -1.358437 | 6.470647  | -1.596289 |
| 1 | -0.377043 | 8.615538  | -1.192725 |
| 1 | 0.868317  | 7.895893  | -0.033466 |
| 6 | 4.639679  | 0.971029  | 1.906100  |
| 6 | 5.015495  | 2.127133  | 2.477400  |
| 1 | 5.426792  | 0.275459  | 1.611308  |
| 1 | 6.067266  | 2.364571  | 2.619310  |
| 1 | 4.297458  | 2.856036  | 2.840924  |
| 6 | -3.958944 | -3.683680 | 0.119948  |
| 6 | -5.068843 | -3.678787 | 1.215016  |
| 1 | -3.622734 | -4.717146 | -0.027063 |
| 1 | -4.418324 | -3.363106 | -0.822455 |
| 1 | -4.644049 | -3.990830 | 2.172243  |
| 1 | -5.470827 | -2.668008 | 1.317616  |
| 6 | -6.309087 | 1.002217  | -1.146044 |
| 6 | -6.380234 | 0.030036  | -2.363855 |
| 1 | -7.033975 | 1.809604  | -1.298566 |
| 1 | -6.637073 | 0.464711  | -0.250346 |
| 1 | -6.796848 | 0.516629  | -3.249462 |
| 1 | -5.361917 | -0.287118 | -2.623676 |
| 6 | -6.194149 | -4.605297 | 0.833602  |
| 8 | -7.097798 | -4.372457 | 0.044079  |
| 8 | -6.100494 | -5.816906 | 1.427301  |
| 1 | -6.843276 | -6.344977 | 1.076184  |
| 6 | -7.162296 | -1.252119 | -2.134914 |
| 8 | -7.921003 | -1.767081 | -2.930230 |
| 8 | -6.860372 | -1.800933 | -0.938088 |
| 1 | -7.240501 | -2.704430 | -0.841231 |
| 6 | 1.363041  | -1.003817 | -2.316826 |
| 6 | 0.666621  | 0.293267  | -2.676833 |
| 1 | 1.035040  | -1.383486 | -1.347748 |
| 1 | 1.206609  | -1.785744 | -3.068332 |
| 1 | -0.412618 | 0.118137  | -2.738826 |
| 1 | 0.832249  | 1.049577  | -1.905087 |
| 1 | 1.017226  | 0.677962  | -3.641530 |

**<sup>5</sup>TS(B-C)<sub>Fe(cys)</sub>**

-----  
Number of imaginary frequencies: 1    Electronic energy:    HF=-3157.9521929  
Zero-point correction=                    0.851612 (Hartree/Particle)  
Thermal correction to Energy=            0.914450  
Thermal correction to Enthalpy=           0.915394  
Thermal correction to Gibbs Free Energy= 0.746060  
Sum of electronic and zero-point Energies= -3157.100581  
Sum of electronic and thermal Energies= -3157.037743  
Sum of electronic and thermal Enthalpies= -3157.036799  
Sum of electronic and thermal Free Energies= -3157.206133

.....  
Cartesian Coordinates

.....  
6      8.080383   -0.130543   -0.590995  
6      7.231989   0.965605   -0.404413  
6      6.140822   0.872314   0.456737  
6      5.826757   -0.316759   1.168290  
6      6.709801   -1.427528   0.946958  
6      7.813754   -1.325782   0.102753  
6      4.685875   -0.418874   2.018345  
7      5.111365   -1.324946   3.640364  
7      4.339718   -1.825721   4.309199  
8      6.366342   -2.594696   1.583929  
6      7.215471   -3.708232   1.453762  
26     -2.708802   -0.166656   -0.422976  
7      -4.371921   0.630693   0.421654  
6      -4.613218   1.956696   0.679568  
6      -5.957840   2.144723   1.193585  
6      -6.531178   0.889753   1.241287  
6      -5.537139   -0.030553   0.745683  
6      -3.713615   2.988025   0.449066  
6      -2.419399   2.830879   -0.013147  
7      -1.813413   1.624147   -0.288351  
6      -0.526499   1.937303   -0.664617  
6      -0.324259   3.376167   -0.668086  
6      -1.505371   3.929538   -0.247441  
6      -5.751622   -1.392541   0.591064  
6      -4.810109   -2.306304   0.144607  
7      -3.497548   -2.004445   -0.133668  
6      -2.878800   -3.209313   -0.382935  
6      -3.814290   -4.297258   -0.274508  
6      -5.038699   -3.737107   0.024363  
6      0.468413   1.013893   -0.946921  
6      0.295825   -0.361526   -0.919013  
7      -0.900734   -1.005929   -0.709964  
6      -0.609825   -2.351335   -0.801389  
6      0.802337   -2.557295   -1.046380  
6      1.375305   -1.314386   -1.113664

|    |           |           |           |
|----|-----------|-----------|-----------|
| 6  | -1.531278 | -3.373558 | -0.675587 |
| 6  | 3.582050  | 0.443235  | 2.094933  |
| 8  | 2.851504  | 0.347730  | 3.264695  |
| 8  | 3.185069  | 1.211626  | 1.183100  |
| 1  | -1.169633 | -4.387843 | -0.803457 |
| 1  | -6.723579 | -1.781375 | 0.863939  |
| 1  | -4.049298 | 4.000038  | 0.642457  |
| 1  | 1.457043  | 1.389249  | -1.173498 |
| 1  | 5.487703  | 1.727066  | 0.585072  |
| 1  | 7.410352  | 1.899803  | -0.930312 |
| 1  | 8.466468  | -2.179630 | -0.047076 |
| 1  | 8.956182  | -0.061076 | -1.232372 |
| 1  | 6.768317  | -4.501958 | 2.057957  |
| 1  | 7.292423  | -4.051875 | 0.410351  |
| 1  | 8.229333  | -3.499828 | 1.827809  |
| 6  | -2.056181 | 0.704121  | -3.662579 |
| 1  | -1.156482 | 0.090643  | -3.558495 |
| 1  | -2.331634 | 0.744566  | -4.721701 |
| 1  | -1.830981 | 1.718530  | -3.320298 |
| 16 | -3.460924 | -0.018601 | -2.729980 |
| 6  | -1.847954 | 5.376876  | -0.054135 |
| 1  | -1.000574 | 6.021863  | -0.303558 |
| 1  | -2.694249 | 5.682940  | -0.682932 |
| 1  | -2.125702 | 5.590283  | 0.986556  |
| 6  | 1.467476  | -3.896301 | -1.158731 |
| 1  | 2.550183  | -3.788287 | -1.267266 |
| 1  | 1.285957  | -4.513402 | -0.269651 |
| 1  | 1.101029  | -4.461150 | -2.026665 |
| 6  | -3.484711 | -5.742374 | -0.501651 |
| 1  | -4.340049 | -6.387229 | -0.279429 |
| 1  | -3.197572 | -5.931810 | -1.544421 |
| 1  | -2.647602 | -6.070388 | 0.127477  |
| 6  | -7.890525 | 0.509801  | 1.744531  |
| 1  | -8.645413 | 0.515291  | 0.945226  |
| 1  | -7.892275 | -0.492848 | 2.184654  |
| 1  | -8.228273 | 1.214853  | 2.511752  |
| 6  | -6.506537 | 3.431852  | 1.604799  |
| 6  | -7.799169 | 3.796573  | 1.619567  |
| 1  | -5.775638 | 4.169638  | 1.935448  |
| 1  | -8.094174 | 4.782597  | 1.967855  |
| 1  | -8.594878 | 3.148112  | 1.267033  |
| 6  | -6.296100 | -4.462097 | 0.190978  |
| 6  | -7.527625 | -4.048621 | -0.147360 |
| 1  | -6.200401 | -5.465599 | 0.608174  |
| 1  | -8.393534 | -4.683226 | 0.020951  |
| 1  | -7.709010 | -3.090217 | -0.624077 |
| 6  | 2.827833  | -0.957016 | -1.249432 |
| 6  | 3.274363  | -0.612713 | -2.698446 |
| 1  | 3.444586  | -1.785016 | -0.889216 |
| 1  | 3.050674  | -0.109655 | -0.589745 |



|   |          |           |           |
|---|----------|-----------|-----------|
| 1 | 3.176821 | -1.498851 | -3.337854 |
| 1 | 2.663670 | 0.188438  | -3.120418 |
| 6 | 0.926955 | 4.065169  | -1.140756 |
| 6 | 2.188856 | 3.891548  | -0.245925 |
| 1 | 0.720441 | 5.134253  | -1.262066 |
| 1 | 1.159337 | 3.689168  | -2.142092 |
| 1 | 2.375406 | 4.780722  | 0.361940  |
| 1 | 2.078063 | 3.047328  | 0.447261  |
| 6 | 4.718535 | -0.158063 | -2.701073 |
| 8 | 5.105122 | 0.973950  | -2.958637 |
| 8 | 5.558187 | -1.138307 | -2.348066 |
| 1 | 6.420881 | -0.732891 | -2.094362 |
| 6 | 3.464269 | 3.576313  | -1.007567 |
| 8 | 4.566522 | 3.999799  | -0.729247 |
| 8 | 3.230270 | 2.716854  | -2.023360 |
| 1 | 4.076162 | 2.343936  | -2.375036 |
| 6 | 1.629434 | 1.077471  | 3.300879  |
| 6 | 0.957913 | 0.764501  | 4.630064  |
| 1 | 0.990241 | 0.789168  | 2.457265  |
| 1 | 1.826237 | 2.153189  | 3.201568  |
| 1 | 0.005251 | 1.302241  | 4.711783  |
| 1 | 0.761556 | -0.309221 | 4.718253  |
| 1 | 1.599046 | 1.060240  | 5.467918  |

---

<sup>5</sup>C<sub>Fe(cys)</sub>

---

Number of imaginary frequencies: 0    Electronic energy:    HF=-3157.9609089  
Zero-point correction=                    0.850194 (Hartree/Particle)  
Thermal correction to Energy=            0.915141  
Thermal correction to Enthalpy=         0.916085  
Thermal correction to Gibbs Free Energy= 0.738881  
Sum of electronic and zero-point Energies= -3157.110715  
Sum of electronic and thermal Energies= -3157.045768  
Sum of electronic and thermal Enthalpies= -3157.044823  
Sum of electronic and thermal Free Energies= -3157.222028

.....  
Cartesian Coordinates

.....  

|   |           |           |          |
|---|-----------|-----------|----------|
| 6 | -2.173962 | -3.100038 | 3.916346 |
| 6 | -0.798834 | -2.886152 | 3.853569 |
| 6 | -0.301102 | -1.800937 | 3.129982 |
| 6 | -1.136756 | -0.902043 | 2.434344 |
| 6 | -2.536860 | -1.126749 | 2.547177 |
| 6 | -3.041961 | -2.212308 | 3.268039 |
| 6 | -0.563710 | 0.148072  | 1.596137 |
| 7 | -3.642814 | 2.973034  | 2.200218 |
| 7 | -2.664663 | 3.484101  | 2.145912 |
| 8 | -3.334563 | -0.192432 | 1.939295 |
| 6 | -4.733036 | -0.342188 | 2.039084 |

|    |           |           |           |
|----|-----------|-----------|-----------|
| 26 | -0.548272 | -0.110153 | -0.864547 |
| 7  | -2.140285 | 1.087771  | -1.205582 |
| 6  | -2.135132 | 2.445327  | -1.337472 |
| 6  | -3.484102 | 2.936489  | -1.586681 |
| 6  | -4.300011 | 1.823474  | -1.609740 |
| 6  | -3.440783 | 0.682851  | -1.374167 |
| 6  | -0.998036 | 3.247084  | -1.312599 |
| 6  | 0.305058  | 2.787600  | -1.181215 |
| 7  | 0.668774  | 1.483294  | -1.015488 |
| 6  | 2.031525  | 1.470010  | -0.930730 |
| 6  | 2.561555  | 2.818588  | -1.073071 |
| 6  | 1.481633  | 3.643157  | -1.220223 |
| 6  | -3.889388 | -0.630945 | -1.331016 |
| 6  | -3.109691 | -1.751339 | -1.064222 |
| 7  | -1.774937 | -1.723165 | -0.773096 |
| 6  | -1.415610 | -3.005763 | -0.445301 |
| 6  | -2.559509 | -3.881707 | -0.511281 |
| 6  | -3.621294 | -3.112103 | -0.940217 |
| 6  | 2.818882  | 0.357454  | -0.673964 |
| 6  | 2.350367  | -0.926646 | -0.423592 |
| 7  | 1.043911  | -1.311853 | -0.478564 |
| 6  | 1.013911  | -2.642322 | -0.159063 |
| 6  | 2.354619  | -3.122636 | 0.128962  |
| 6  | 3.192155  | -2.049354 | -0.035912 |
| 6  | -0.127805 | -3.430470 | -0.131429 |
| 6  | 0.157866  | 1.204461  | 2.269276  |
| 8  | -0.450687 | 1.593518  | 3.465951  |
| 8  | 1.181517  | 1.784414  | 1.907678  |
| 1  | -0.004731 | -4.474854 | 0.134645  |
| 1  | -4.947930 | -0.798192 | -1.479066 |
| 1  | -1.132990 | 4.313479  | -1.452340 |
| 1  | 3.887127  | 0.514916  | -0.610023 |
| 1  | 0.772603  | -1.638552 | 3.072502  |
| 1  | -0.112163 | -3.556870 | 4.366440  |
| 1  | -4.112583 | -2.371907 | 3.339862  |
| 1  | -2.583089 | -3.940047 | 4.473670  |
| 1  | -5.163848 | 0.506554  | 1.505082  |
| 1  | -5.079057 | -1.275416 | 1.572847  |
| 1  | -5.070647 | -0.319114 | 3.086409  |
| 6  | -0.069213 | -2.271269 | -3.716598 |
| 1  | -0.977429 | -2.798198 | -3.401230 |
| 1  | 0.086964  | -2.467475 | -4.784207 |
| 1  | 0.777794  | -2.696431 | -3.164521 |
| 16 | -0.206138 | -0.463502 | -3.431783 |
| 6  | 1.450060  | 5.133321  | -1.380702 |
| 1  | 2.460779  | 5.552697  | -1.415297 |
| 1  | 0.936969  | 5.432439  | -2.304250 |
| 1  | 0.922549  | 5.617022  | -0.547780 |
| 6  | 2.689070  | -4.526504 | 0.536810  |
| 1  | 2.117969  | -4.834520 | 1.422032  |

|   |           |           |           |
|---|-----------|-----------|-----------|
| 1 | 2.458425  | -5.246604 | -0.259995 |
| 1 | 3.752228  | -4.635166 | 0.775380  |
| 6 | -2.538239 | -5.347849 | -0.197997 |
| 1 | -1.882480 | -5.901698 | -0.883338 |
| 1 | -2.171946 | -5.529639 | 0.820458  |
| 1 | -3.535924 | -5.790213 | -0.277998 |
| 6 | -5.786014 | 1.771150  | -1.796974 |
| 1 | -6.068507 | 1.684805  | -2.856236 |
| 1 | -6.230248 | 0.917086  | -1.274846 |
| 1 | -6.256507 | 2.682925  | -1.411896 |
| 6 | -3.828052 | 4.344600  | -1.733402 |
| 6 | -4.873964 | 4.869993  | -2.394291 |
| 1 | -3.149779 | 5.042799  | -1.242484 |
| 1 | -5.035471 | 5.944604  | -2.413196 |
| 1 | -5.579215 | 4.263603  | -2.953418 |
| 6 | -4.974427 | -3.596190 | -1.199566 |
| 6 | -5.840419 | -3.163209 | -2.130694 |
| 1 | -5.292184 | -4.432453 | -0.574363 |
| 1 | -6.825485 | -3.612801 | -2.225929 |
| 1 | -5.591175 | -2.377403 | -2.836975 |
| 6 | 4.676074  | -1.985560 | 0.192559  |
| 6 | 5.513425  | -1.973358 | -1.120707 |
| 1 | 4.991377  | -2.844652 | 0.796700  |
| 1 | 4.933072  | -1.086674 | 0.763592  |
| 1 | 5.276980  | -2.853016 | -1.724145 |
| 1 | 5.270334  | -1.075719 | -1.695325 |
| 6 | 4.023338  | 3.164036  | -1.016298 |
| 6 | 4.640339  | 3.050510  | 0.412876  |
| 1 | 4.178739  | 4.182333  | -1.389487 |
| 1 | 4.574513  | 2.505425  | -1.694734 |
| 1 | 4.753193  | 4.030932  | 0.882443  |
| 1 | 3.956929  | 2.474686  | 1.051354  |
| 6 | 6.988127  | -1.952140 | -0.808124 |
| 8 | 7.630796  | -1.000396 | -0.391917 |
| 8 | 7.581038  | -3.154783 | -0.987146 |
| 1 | 8.512515  | -3.035862 | -0.718272 |
| 6 | 5.987261  | 2.354791  | 0.486715  |
| 8 | 6.915598  | 2.684382  | 1.195362  |
| 8 | 6.023072  | 1.259516  | -0.308126 |
| 1 | 6.839397  | 0.730619  | -0.160463 |
| 6 | 0.186216  | 2.666323  | 4.156812  |
| 6 | -0.623168 | 2.944393  | 5.415038  |
| 1 | 0.236336  | 3.551249  | 3.510158  |
| 1 | 1.220546  | 2.392381  | 4.401569  |
| 1 | -0.167371 | 3.758331  | 5.992884  |
| 1 | -1.648676 | 3.232823  | 5.159966  |
| 1 | -0.671093 | 2.052316  | 6.049112  |

---

<sup>5</sup>TS(C-D)<sub>Fe(cys)</sub>

-----

|                                              |                             |                  |
|----------------------------------------------|-----------------------------|------------------|
| Number of imaginary frequencies: 1           | Electronic energy:          | HF=-3048.4246379 |
| Zero-point correction=                       | 0.838381 (Hartree/Particle) |                  |
| Thermal correction to Energy=                | 0.897900                    |                  |
| Thermal correction to Enthalpy=              | 0.898844                    |                  |
| Thermal correction to Gibbs Free Energy=     | 0.740028                    |                  |
| Sum of electronic and zero-point Energies=   | -3047.586257                |                  |
| Sum of electronic and thermal Energies=      | -3047.526738                |                  |
| Sum of electronic and thermal Enthalpies=    | -3047.525794                |                  |
| Sum of electronic and thermal Free Energies= | -3047.684610                |                  |

.....

Cartesian Coordinates

.....

|    |           |           |           |
|----|-----------|-----------|-----------|
| 6  | 2.860525  | 1.178821  | 3.647520  |
| 6  | 2.020448  | 2.176202  | 3.146171  |
| 6  | 0.806691  | 1.837668  | 2.547859  |
| 6  | 0.385245  | 0.498861  | 2.428422  |
| 6  | 1.231224  | -0.486105 | 3.001234  |
| 6  | 2.452167  | -0.153204 | 3.587641  |
| 6  | -0.866788 | 0.079042  | 1.757739  |
| 8  | 0.897747  | -1.824487 | 3.000128  |
| 6  | -0.478075 | -2.104974 | 3.011319  |
| 26 | -0.817427 | -0.076318 | -0.476264 |
| 7  | -2.526181 | 1.121173  | -0.676602 |
| 6  | -2.533136 | 2.472219  | -0.805453 |
| 6  | -3.908947 | 2.935927  | -0.999613 |
| 6  | -4.704300 | 1.803863  | -0.988126 |
| 6  | -3.810463 | 0.672722  | -0.793895 |
| 6  | -1.388285 | 3.285528  | -0.824420 |
| 6  | -0.046520 | 2.891821  | -0.761816 |
| 7  | 0.393879  | 1.612672  | -0.609913 |
| 6  | 1.752390  | 1.621492  | -0.671451 |
| 6  | 2.224271  | 2.996940  | -0.856694 |
| 6  | 1.102333  | 3.785912  | -0.903081 |
| 6  | -4.202866 | -0.673540 | -0.751049 |
| 6  | -3.390735 | -1.808826 | -0.614430 |
| 7  | -2.041475 | -1.778742 | -0.441707 |
| 6  | -1.596166 | -3.060672 | -0.296291 |
| 6  | -2.724554 | -3.973106 | -0.347658 |
| 6  | -3.849329 | -3.203272 | -0.577062 |
| 6  | 2.565193  | 0.486692  | -0.559621 |
| 6  | 2.167500  | -0.846699 | -0.382902 |
| 7  | 0.881512  | -1.280037 | -0.344767 |
| 6  | 0.890057  | -2.634881 | -0.191989 |
| 6  | 2.270504  | -3.101838 | -0.099863 |
| 6  | 3.065426  | -1.988372 | -0.216134 |
| 6  | -0.250519 | -3.446892 | -0.160442 |
| 6  | -2.082239 | 0.778411  | 2.222653  |
| 8  | -3.130127 | -0.089511 | 2.381423  |
| 8  | -2.205378 | 1.969680  | 2.470164  |

|    |           |           |           |
|----|-----------|-----------|-----------|
| 1  | -0.072566 | -4.512977 | -0.047764 |
| 1  | -5.266631 | -0.861860 | -0.831731 |
| 1  | -1.560391 | 4.348753  | -0.959090 |
| 1  | 3.632304  | 0.658436  | -0.617762 |
| 1  | 0.158294  | 2.608759  | 2.151488  |
| 1  | 2.311110  | 3.222312  | 3.214811  |
| 1  | 3.061541  | -0.953449 | 3.998141  |
| 1  | 3.821570  | 1.431810  | 4.087233  |
| 1  | -0.946796 | -1.918550 | 3.985924  |
| 1  | -0.962502 | -1.181945 | 2.153950  |
| 1  | -0.652479 | -3.101968 | 2.612508  |
| 6  | -0.597060 | -1.904878 | -3.429811 |
| 1  | -1.490552 | -2.470697 | -3.147322 |
| 1  | -0.504868 | -1.925947 | -4.522652 |
| 1  | 0.280401  | -2.398019 | -2.999105 |
| 16 | -0.707126 | -0.153491 | -2.907358 |
| 6  | 0.999144  | 5.271958  | -1.081465 |
| 1  | 1.984824  | 5.744457  | -1.142361 |
| 1  | 0.452777  | 5.533289  | -1.997844 |
| 1  | 0.462713  | 5.741213  | -0.245882 |
| 6  | 2.680846  | -4.529550 | 0.105689  |
| 1  | 2.355669  | -5.171117 | -0.724876 |
| 1  | 3.768212  | -4.630654 | 0.188490  |
| 1  | 2.241432  | -4.944916 | 1.022136  |
| 6  | -2.632969 | -5.466546 | -0.239489 |
| 1  | -2.024876 | -5.772287 | 0.621441  |
| 1  | -3.620641 | -5.925459 | -0.126693 |
| 1  | -2.170642 | -5.912934 | -1.131337 |
| 6  | -6.195511 | 1.723721  | -1.116667 |
| 1  | -6.520304 | 1.658199  | -2.165505 |
| 1  | -6.598299 | 0.845607  | -0.600224 |
| 1  | -6.671392 | 2.614064  | -0.689280 |
| 6  | -4.290395 | 4.334800  | -1.132219 |
| 6  | -5.382646 | 4.841545  | -1.731118 |
| 1  | -3.596402 | 5.046769  | -0.684466 |
| 1  | -5.562184 | 5.913523  | -1.742511 |
| 1  | -6.111196 | 4.222722  | -2.244938 |
| 6  | -5.204200 | -3.719242 | -0.746778 |
| 6  | -6.187314 | -3.229314 | -1.520620 |
| 1  | -5.420813 | -4.634812 | -0.192693 |
| 1  | -7.159854 | -3.713573 | -1.556855 |
| 1  | -6.051266 | -2.359134 | -2.154931 |
| 6  | 4.562867  | -1.905150 | -0.146029 |
| 6  | 5.225244  | -1.743834 | -1.549146 |
| 1  | 4.967840  | -2.809285 | 0.323269  |
| 1  | 4.868016  | -1.060217 | 0.483005  |
| 1  | 4.959698  | -2.596307 | -2.179950 |
| 1  | 4.863982  | -0.827804 | -2.022963 |
| 6  | 3.656681  | 3.436529  | -1.012748 |
| 6  | 4.562569  | 3.264372  | 0.242718  |

|   |           |           |           |
|---|-----------|-----------|-----------|
| 1 | 3.660031  | 4.495687  | -1.290747 |
| 1 | 4.123966  | 2.909409  | -1.851681 |
| 1 | 5.219582  | 4.141833  | 0.331641  |
| 1 | 3.971375  | 3.214002  | 1.159940  |
| 6 | 6.720632  | -1.654344 | -1.418161 |
| 8 | 7.370422  | -0.644281 | -1.190793 |
| 8 | 7.333799  | -2.854171 | -1.522760 |
| 1 | 8.282206  | -2.685768 | -1.362058 |
| 6 | 5.496129  | 2.064948  | 0.254042  |
| 8 | 5.824482  | 1.459371  | 1.255718  |
| 8 | 5.970321  | 1.760710  | -0.973055 |
| 1 | 6.541427  | 0.955575  | -0.905362 |
| 6 | -4.368559 | 0.499696  | 2.795923  |
| 6 | -5.362782 | -0.631759 | 3.001328  |
| 1 | -4.709581 | 1.201208  | 2.026727  |
| 1 | -4.210834 | 1.073640  | 3.716578  |
| 1 | -6.334490 | -0.230490 | 3.314790  |
| 1 | -5.499402 | -1.196639 | 2.073797  |
| 1 | -5.009534 | -1.324426 | 3.773514  |

---

$^5\text{D}_{\text{Fe}(\text{cys})}$

---

Number of imaginary frequencies: 0    Electronic energy:    HF=-3048.4856298  
Zero-point correction=                    0.841548 (Hartree/Particle)  
Thermal correction to Energy=            0.902976  
Thermal correction to Enthalpy=         0.903920  
Thermal correction to Gibbs Free Energy= 0.736069  
Sum of electronic and zero-point Energies= -3047.644082  
Sum of electronic and thermal Energies= -3047.582654  
Sum of electronic and thermal Enthalpies= -3047.581710  
Sum of electronic and thermal Free Energies= -3047.749561

.....  
Cartesian Coordinates

.....

|    |           |           |           |
|----|-----------|-----------|-----------|
| 6  | -0.221676 | 6.224046  | 1.949819  |
| 6  | -1.558444 | 6.680106  | 1.937729  |
| 6  | -2.602441 | 5.793055  | 1.796197  |
| 6  | -2.378042 | 4.382194  | 1.657821  |
| 6  | -0.999778 | 3.957267  | 1.697156  |
| 6  | 0.057456  | 4.870014  | 1.830214  |
| 6  | -3.410321 | 3.446472  | 1.475621  |
| 8  | -0.806452 | 2.617819  | 1.595469  |
| 6  | 0.364694  | 1.984095  | 1.541702  |
| 26 | 0.297825  | -2.036936 | -0.859935 |
| 7  | -1.867822 | -1.872767 | -0.892663 |
| 6  | -2.595341 | -0.931497 | -1.549968 |
| 6  | -4.008142 | -1.320290 | -1.593914 |
| 6  | -4.092566 | -2.524525 | -0.922023 |
| 6  | -2.740760 | -2.846373 | -0.490433 |

|    |           |           |           |
|----|-----------|-----------|-----------|
| 6  | -2.069380 | 0.245963  | -2.099374 |
| 6  | -0.755051 | 0.712014  | -2.009010 |
| 7  | 0.262870  | 0.071218  | -1.365377 |
| 6  | 1.360381  | 0.876097  | -1.452566 |
| 6  | 1.041480  | 2.082565  | -2.219239 |
| 6  | -0.285064 | 1.979980  | -2.557679 |
| 6  | -2.396470 | -3.979523 | 0.257287  |
| 6  | -1.146123 | -4.299841 | 0.798996  |
| 7  | -0.040854 | -3.509015 | 0.698918  |
| 6  | 0.921066  | -4.051759 | 1.501605  |
| 6  | 0.426502  | -5.263623 | 2.130010  |
| 6  | -0.863096 | -5.446100 | 1.670939  |
| 6  | 2.580407  | 0.620423  | -0.814940 |
| 6  | 2.882316  | -0.447538 | 0.042434  |
| 7  | 2.067491  | -1.512906 | 0.281535  |
| 6  | 2.705024  | -2.310952 | 1.190742  |
| 6  | 3.990569  | -1.727591 | 1.556972  |
| 6  | 4.097250  | -0.556838 | 0.848189  |
| 6  | 2.189511  | -3.496043 | 1.723153  |
| 6  | -4.826330 | 3.743886  | 1.400213  |
| 8  | -5.533792 | 2.587806  | 1.194926  |
| 8  | -5.390500 | 4.832239  | 1.490931  |
| 1  | 2.833125  | -4.031726 | 2.415736  |
| 1  | -3.203991 | -4.661320 | 0.496007  |
| 1  | -2.764642 | 0.883854  | -2.635819 |
| 1  | 3.359684  | 1.361123  | -0.954254 |
| 1  | -3.630309 | 6.132709  | 1.777598  |
| 1  | -1.765492 | 7.742809  | 2.037436  |
| 1  | 1.087304  | 4.530329  | 1.831497  |
| 1  | 0.597227  | 6.930393  | 2.056439  |
| 1  | 1.293432  | 2.532335  | 1.457624  |
| 1  | -3.148382 | 2.402935  | 1.356618  |
| 1  | 0.275046  | 0.919755  | 1.382023  |
| 6  | 2.085158  | -4.549767 | -2.133275 |
| 1  | 1.506812  | -5.249913 | -1.521030 |
| 1  | 2.540222  | -5.109969 | -2.958079 |
| 1  | 2.888746  | -4.135188 | -1.515126 |
| 16 | 1.012573  | -3.218376 | -2.830048 |
| 6  | -1.138425 | 2.948822  | -3.321757 |
| 1  | -0.551263 | 3.781770  | -3.722537 |
| 1  | -1.640357 | 2.462717  | -4.168212 |
| 1  | -1.924782 | 3.380873  | -2.688080 |
| 6  | 4.952725  | -2.314010 | 2.547634  |
| 1  | 5.340392  | -3.284760 | 2.209497  |
| 1  | 5.815824  | -1.659972 | 2.712604  |
| 1  | 4.478011  | -2.484426 | 3.522912  |
| 6  | 1.213024  | -6.143181 | 3.056126  |
| 1  | 1.673444  | -5.565408 | 3.868092  |
| 1  | 0.584896  | -6.914486 | 3.513553  |
| 1  | 2.028137  | -6.660438 | 2.530941  |

|   |           |           |           |
|---|-----------|-----------|-----------|
| 6 | -5.321979 | -3.328270 | -0.624835 |
| 1 | -5.565312 | -4.030328 | -1.435834 |
| 1 | -5.206786 | -3.919734 | 0.289521  |
| 1 | -6.192538 | -2.674551 | -0.495289 |
| 6 | -5.064976 | -0.510670 | -2.183137 |
| 6 | -6.264570 | -0.917169 | -2.638337 |
| 1 | -4.844129 | 0.554096  | -2.259460 |
| 1 | -6.972965 | -0.201801 | -3.047916 |
| 1 | -6.566301 | -1.959477 | -2.650375 |
| 6 | -1.737881 | -6.563320 | 2.011522  |
| 6 | -2.680772 | -7.132113 | 1.241934  |
| 1 | -1.573764 | -6.997472 | 2.999781  |
| 1 | -3.271583 | -7.966909 | 1.610344  |
| 1 | -2.874526 | -6.806871 | 0.224565  |
| 6 | 5.176507  | 0.482431  | 0.938588  |
| 6 | 6.148790  | 0.480847  | -0.274123 |
| 1 | 5.766263  | 0.328554  | 1.850612  |
| 1 | 4.731178  | 1.480565  | 1.024938  |
| 1 | 6.665461  | -0.478171 | -0.355441 |
| 1 | 5.579124  | 0.637774  | -1.196691 |
| 6 | 1.978681  | 3.203495  | -2.579850 |
| 6 | 2.241129  | 4.263538  | -1.465473 |
| 1 | 1.559550  | 3.738812  | -3.438800 |
| 1 | 2.944879  | 2.810362  | -2.915522 |
| 1 | 2.531728  | 5.205415  | -1.949595 |
| 1 | 1.338827  | 4.447683  | -0.878784 |
| 6 | 7.148845  | 1.598664  | -0.149547 |
| 8 | 6.883404  | 2.790974  | -0.088688 |
| 8 | 8.427110  | 1.175188  | -0.066169 |
| 1 | 8.972666  | 1.979822  | 0.031524  |
| 6 | 3.369628  | 3.907751  | -0.520213 |
| 8 | 3.279209  | 3.791428  | 0.691304  |
| 8 | 4.525623  | 3.742717  | -1.186856 |
| 1 | 5.251600  | 3.471907  | -0.572297 |
| 6 | -6.953284 | 2.733773  | 1.070831  |
| 6 | -7.540020 | 1.343544  | 0.889142  |
| 1 | -7.178371 | 3.384070  | 0.216566  |
| 1 | -7.348875 | 3.230341  | 1.964847  |
| 1 | -8.629179 | 1.407257  | 0.778122  |
| 1 | -7.126980 | 0.854598  | 0.000775  |
| 1 | -7.317531 | 0.713046  | 1.756551  |

---

**AIr(Me)**

---

Number of imaginary frequencies: 0    Electronic energy:    HF=-1979.5214745  
Zero-point correction=                    0.636846 (Hartree/Particle)  
Thermal correction to Energy=            0.679358  
Thermal correction to Enthalpy=        0.680302  
Thermal correction to Gibbs Free Energy=    0.560149



|                                              |              |
|----------------------------------------------|--------------|
| Sum of electronic and zero-point Energies=   | -1978.884629 |
| Sum of electronic and thermal Energies=      | -1978.842117 |
| Sum of electronic and thermal Enthalpies=    | -1978.841173 |
| Sum of electronic and thermal Free Energies= | -1978.961325 |

.....  
Cartesian Coordinates  
.....

|    |           |           |           |
|----|-----------|-----------|-----------|
| 6  | -3.996948 | -3.095273 | -0.083567 |
| 6  | -2.638459 | -2.595259 | -0.138213 |
| 7  | -2.640442 | -1.218189 | -0.103397 |
| 6  | -3.952900 | -0.822693 | -0.016116 |
| 6  | -4.821358 | -1.993724 | -0.001647 |
| 6  | -1.495425 | -3.386323 | -0.221120 |
| 6  | -0.179733 | -2.949140 | -0.309575 |
| 7  | 0.214334  | -1.630430 | -0.324469 |
| 6  | 1.584816  | -1.624533 | -0.433554 |
| 6  | 2.078691  | -2.992981 | -0.486452 |
| 6  | 0.984816  | -3.813191 | -0.411994 |
| 6  | 2.375506  | -0.482153 | -0.512069 |
| 6  | 1.939901  | 0.838752  | -0.479207 |
| 7  | 0.631925  | 1.231223  | -0.320636 |
| 6  | 0.622116  | 2.606700  | -0.328431 |
| 6  | 1.971937  | 3.107086  | -0.520321 |
| 6  | 2.790061  | 2.011201  | -0.615451 |
| 6  | -0.508208 | 3.401650  | -0.172120 |
| 6  | -1.821131 | 2.970166  | -0.012023 |
| 7  | -2.216619 | 1.654215  | -0.044035 |
| 6  | -3.589758 | 1.641570  | 0.048888  |
| 6  | -4.089721 | 2.996084  | 0.134183  |
| 6  | -2.993684 | 3.829397  | 0.124443  |
| 77 | -0.996428 | 0.007106  | -0.128507 |
| 6  | -4.381498 | 0.497100  | 0.065331  |
| 1  | -0.355334 | 4.473386  | -0.205579 |
| 1  | -5.450606 | 0.655974  | 0.154234  |
| 1  | -1.647633 | -4.460319 | -0.222804 |
| 1  | 3.443077  | -0.638459 | -0.612043 |
| 6  | -0.850834 | -0.004688 | 1.931383  |
| 1  | -1.849017 | -0.151372 | 2.353251  |
| 1  | -0.189190 | -0.820681 | 2.235475  |
| 1  | -0.441007 | 0.954783  | 2.259335  |
| 6  | 4.276253  | 1.987020  | -0.839182 |
| 1  | 4.539733  | 1.169560  | -1.521562 |
| 1  | 4.596612  | 2.912833  | -1.327374 |
| 6  | 5.101206  | 1.828069  | 0.466404  |
| 1  | 4.879335  | 0.877930  | 0.954935  |
| 1  | 4.841322  | 2.640086  | 1.154568  |
| 6  | 6.580413  | 1.946045  | 0.174462  |
| 8  | 7.133588  | 2.917900  | -0.283927 |
| 8  | 7.280445  | 0.802163  | 0.463174  |
| 1  | 8.211809  | 0.989881  | 0.234646  |

|   |           |           |           |
|---|-----------|-----------|-----------|
| 6 | 3.534582  | -3.359638 | -0.559402 |
| 1 | 4.042648  | -2.695041 | -1.264760 |
| 1 | 3.647130  | -4.371619 | -0.961777 |
| 6 | 4.251573  | -3.284227 | 0.824473  |
| 1 | 3.648046  | -2.670290 | 1.505197  |
| 1 | 4.347776  | -4.271573 | 1.281321  |
| 6 | 5.627219  | -2.647740 | 0.809336  |
| 8 | 6.616740  | -3.076887 | 1.358469  |
| 8 | 5.613227  | -1.466612 | 0.139358  |
| 1 | 6.469577  | -1.008324 | 0.272988  |
| 6 | 0.934349  | -5.311652 | -0.425546 |
| 1 | 1.927078  | -5.743147 | -0.584529 |
| 1 | 0.550014  | -5.714031 | 0.521057  |
| 1 | 0.280889  | -5.687515 | -1.223163 |
| 6 | 2.336856  | 4.559476  | -0.599128 |
| 1 | 2.135231  | 5.080291  | 0.346373  |
| 1 | 3.398422  | 4.695474  | -0.825534 |
| 1 | 1.763986  | 5.078080  | -1.378023 |
| 6 | -4.383770 | -4.540640 | -0.163104 |
| 1 | -3.699676 | -5.105365 | -0.806014 |
| 1 | -4.377625 | -5.026779 | 0.822519  |
| 1 | -5.393998 | -4.648047 | -0.570792 |
| 6 | -5.537099 | 3.366407  | 0.257582  |
| 1 | -6.132471 | 2.951509  | -0.565688 |
| 1 | -5.972467 | 2.988511  | 1.192182  |
| 1 | -5.673866 | 4.451170  | 0.253468  |
| 6 | -6.278831 | -1.928284 | 0.043196  |
| 6 | -7.108940 | -2.833352 | 0.584939  |
| 1 | -6.725657 | -1.045217 | -0.413810 |
| 1 | -8.185601 | -2.695462 | 0.544983  |
| 1 | -6.751345 | -3.718448 | 1.101676  |
| 6 | -3.024169 | 5.287797  | 0.228687  |
| 6 | -2.136680 | 6.078613  | 0.851091  |
| 1 | -3.890301 | 5.766839  | -0.228608 |
| 1 | -2.268730 | 7.156611  | 0.868396  |
| 1 | -1.276510 | 5.685575  | 1.384590  |

---

**BIr(Me)**

---

Number of imaginary frequencies: 0    Electronic energy:    HF=-2741.0390459  
Zero-point correction=                    0.858326 (Hartree/Particle)  
Thermal correction to Energy=            0.918039  
Thermal correction to Enthalpy=         0.918983  
Thermal correction to Gibbs Free Energy= 0.759223  
Sum of electronic and zero-point Energies= -2740.180720  
Sum of electronic and thermal Energies= -2740.121007  
Sum of electronic and thermal Enthalpies= -2740.120063  
Sum of electronic and thermal Free Energies= -2740.279822

## Cartesian Coordinates

|    |           |           |           |
|----|-----------|-----------|-----------|
| 6  | -3.075919 | 2.378958  | -2.026531 |
| 6  | -2.527176 | 1.083885  | -1.682828 |
| 7  | -1.226845 | 1.223186  | -1.257032 |
| 6  | -0.915157 | 2.558872  | -1.341570 |
| 6  | -2.086526 | 3.305488  | -1.793443 |
| 6  | -3.219872 | -0.120298 | -1.763658 |
| 6  | -2.766116 | -1.379327 | -1.383808 |
| 7  | -1.516602 | -1.641037 | -0.881465 |
| 6  | -1.460908 | -2.992271 | -0.622700 |
| 6  | -2.725640 | -3.613426 | -0.957173 |
| 6  | -3.539864 | -2.614851 | -1.449111 |
| 6  | -0.345887 | -3.662375 | -0.123458 |
| 6  | 0.894537  | -3.114861 | 0.181090  |
| 7  | 1.226998  | -1.787763 | 0.038496  |
| 6  | 2.544099  | -1.663212 | 0.410349  |
| 6  | 3.065213  | -2.960793 | 0.818015  |
| 6  | 2.040690  | -3.859227 | 0.679298  |
| 77 | 0.013036  | -0.291984 | -0.663176 |
| 7  | 1.524943  | 1.064943  | -0.378978 |
| 6  | 2.803725  | 0.787251  | 0.041365  |
| 6  | 3.590877  | 2.010403  | 0.048674  |
| 6  | 2.767197  | 3.014761  | -0.392972 |
| 6  | 1.474116  | 2.409262  | -0.657053 |
| 6  | 3.268183  | -0.473982 | 0.406669  |
| 6  | 0.346351  | 3.092547  | -1.102887 |
| 8  | -5.527568 | -0.756533 | 1.315424  |
| 6  | -4.936412 | 0.465594  | 1.318528  |
| 8  | -5.448825 | 1.466963  | 0.846178  |
| 6  | -3.620176 | 0.422432  | 1.967763  |
| 7  | -3.256630 | -0.768034 | 2.408214  |
| 7  | -2.974010 | -1.801524 | 2.783850  |
| 6  | -2.756414 | 1.595397  | 2.217811  |
| 6  | -3.323302 | 2.872957  | 2.362006  |
| 6  | -2.534553 | 3.984325  | 2.652753  |
| 6  | -1.157674 | 3.839730  | 2.817223  |
| 6  | -0.568360 | 2.584433  | 2.664428  |
| 6  | -1.354293 | 1.473730  | 2.353589  |
| 8  | -0.812702 | 0.224618  | 2.142377  |
| 6  | 0.334842  | -0.140012 | 2.916913  |
| 1  | 0.460993  | 4.153564  | -1.289344 |
| 1  | 4.305185  | -0.541525 | 0.713502  |
| 1  | -0.450703 | -4.730909 | 0.030514  |
| 1  | -4.229130 | -0.060949 | -2.154599 |
| 1  | -4.392563 | 2.984334  | 2.237887  |
| 1  | -3.002675 | 4.958220  | 2.761965  |
| 1  | 0.505781  | 2.471958  | 2.759738  |
| 1  | -0.536400 | 4.698399  | 3.057014  |
| 1  | 0.440876  | -1.218934 | 2.800423  |

|   |           |           |           |
|---|-----------|-----------|-----------|
| 1 | 1.240880  | 0.347437  | 2.545114  |
| 1 | 0.177815  | 0.114298  | 3.971765  |
| 6 | 0.664590  | -0.610536 | -2.593461 |
| 1 | 1.710620  | -0.931416 | -2.570508 |
| 1 | 0.047923  | -1.386255 | -3.057670 |
| 1 | 0.575055  | 0.322555  | -3.158244 |
| 6 | -6.858241 | -0.834791 | 0.757165  |
| 1 | -6.940744 | -1.865766 | 0.405532  |
| 1 | -6.925517 | -0.154443 | -0.095291 |
| 6 | -7.914568 | -0.508250 | 1.802833  |
| 1 | -7.823927 | 0.532031  | 2.128955  |
| 1 | -8.915421 | -0.649284 | 1.378317  |
| 1 | -7.814917 | -1.163175 | 2.674625  |
| 6 | -4.493343 | 2.618593  | -2.448062 |
| 1 | -4.649098 | 3.656707  | -2.755257 |
| 1 | -4.782882 | 1.975392  | -3.288797 |
| 1 | -5.180787 | 2.411745  | -1.617798 |
| 6 | -3.055536 | -5.059575 | -0.746197 |
| 1 | -4.123709 | -5.186374 | -0.540657 |
| 1 | -2.819727 | -5.673121 | -1.627126 |
| 1 | -2.501143 | -5.479607 | 0.099536  |
| 6 | -2.207409 | 4.753128  | -1.959669 |
| 6 | -1.656423 | 5.704807  | -1.190891 |
| 1 | -2.844614 | 5.074362  | -2.784176 |
| 1 | -1.818646 | 6.757332  | -1.405691 |
| 1 | -1.065794 | 5.470130  | -0.310569 |
| 6 | -4.916048 | -2.686784 | -1.924478 |
| 6 | -5.550523 | -3.756389 | -2.433067 |
| 1 | -5.480265 | -1.756851 | -1.866495 |
| 1 | -6.587973 | -3.687400 | -2.747564 |
| 1 | -5.063564 | -4.714660 | -2.579910 |
| 6 | 3.080982  | 4.469304  | -0.580399 |
| 1 | 4.086932  | 4.712905  | -0.225142 |
| 1 | 3.027192  | 4.762128  | -1.637189 |
| 1 | 2.375082  | 5.109503  | -0.036517 |
| 6 | 5.032795  | 2.110076  | 0.461774  |
| 1 | 5.251514  | 3.127749  | 0.804531  |
| 1 | 5.233581  | 1.443721  | 1.308367  |
| 6 | 4.483653  | -3.202744 | 1.256483  |
| 1 | 4.537875  | -4.129253 | 1.837342  |
| 1 | 4.797300  | -2.402475 | 1.933568  |
| 6 | 5.493292  | -3.293013 | 0.070597  |
| 1 | 5.008778  | -2.922662 | -0.842517 |
| 1 | 5.789441  | -4.325452 | -0.128891 |
| 6 | 6.021227  | 1.752494  | -0.687149 |
| 1 | 5.842968  | 0.725882  | -1.014275 |
| 1 | 5.864497  | 2.429272  | -1.531099 |
| 6 | 6.766092  | -2.475359 | 0.212975  |
| 8 | 7.867196  | -2.837702 | -0.137358 |
| 8 | 6.514080  | -1.245139 | 0.716943  |

|   |          |           |           |
|---|----------|-----------|-----------|
| 1 | 7.312940 | -0.667548 | 0.643807  |
| 6 | 7.450729 | 1.856192  | -0.214015 |
| 8 | 8.087539 | 0.981233  | 0.352444  |
| 8 | 7.983060 | 3.074291  | -0.432756 |
| 1 | 8.886842 | 3.054625  | -0.061977 |
| 6 | 2.042246 | -5.333128 | 0.955565  |
| 1 | 1.893244 | -5.918153 | 0.038307  |
| 1 | 2.989831 | -5.655776 | 1.397110  |
| 1 | 1.241453 | -5.616268 | 1.650552  |

-----

**TS(B-C)<sub>Ir(Me)</sub>**

-----

Number of imaginary frequencies: 1    Electronic energy:    HF=-2740.9924631  
Zero-point correction=                    0.854747 (Hartree/Particle)  
Thermal correction to Energy=            0.914244  
Thermal correction to Enthalpy=         0.915188  
Thermal correction to Gibbs Free Energy=    0.758524  
Sum of electronic and zero-point Energies=    -2740.137716  
Sum of electronic and thermal Energies=    -2740.078219  
Sum of electronic and thermal Enthalpies=   -2740.077275  
Sum of electronic and thermal Free Energies=   -2740.233940

.....

Cartesian Coordinates

.....

|    |           |           |           |
|----|-----------|-----------|-----------|
| 6  | 3.082642  | -3.713430 | -1.006070 |
| 6  | 1.862039  | -3.021142 | -0.649454 |
| 7  | 2.040618  | -1.659955 | -0.778181 |
| 6  | 3.315654  | -1.463428 | -1.248176 |
| 6  | 3.988279  | -2.748406 | -1.393165 |
| 6  | 0.665462  | -3.642254 | -0.296615 |
| 6  | -0.564727 | -3.029405 | -0.076192 |
| 7  | -0.787130 | -1.677289 | -0.100434 |
| 6  | -2.135791 | -1.482809 | 0.054062  |
| 6  | -2.797994 | -2.771431 | 0.211559  |
| 6  | -1.821849 | -3.730617 | 0.140104  |
| 6  | -2.776412 | -0.246579 | 0.057744  |
| 6  | -2.189652 | 1.005613  | -0.112741 |
| 7  | -0.858376 | 1.227625  | -0.339651 |
| 6  | -0.693461 | 2.571549  | -0.536402 |
| 6  | -1.971333 | 3.247772  | -0.384612 |
| 6  | -2.900899 | 2.276345  | -0.116989 |
| 6  | 0.504789  | 3.196672  | -0.874121 |
| 6  | 1.736376  | 2.588465  | -1.101444 |
| 7  | 1.971529  | 1.240557  | -1.028162 |
| 6  | 3.242253  | 1.017532  | -1.491092 |
| 6  | 3.858096  | 2.275864  | -1.858926 |
| 6  | 2.941676  | 3.264980  | -1.579753 |
| 77 | 0.616439  | -0.213461 | -0.492224 |
| 6  | 3.858942  | -0.228189 | -1.586814 |

|   |           |           |           |
|---|-----------|-----------|-----------|
| 1 | 0.463627  | 4.267707  | -1.029927 |
| 1 | 4.863687  | -0.235644 | -1.995390 |
| 1 | 0.678181  | -4.726214 | -0.254974 |
| 1 | -3.850881 | -0.260743 | 0.196883  |
| 6 | 0.990986  | 0.114144  | 1.764163  |
| 6 | 1.312440  | 1.479706  | 2.278608  |
| 6 | 0.300305  | 2.282032  | 2.842048  |
| 6 | 2.601433  | 2.066589  | 2.147920  |
| 6 | 0.533556  | 3.598264  | 3.237550  |
| 1 | -0.691143 | 1.864279  | 2.943341  |
| 6 | 2.840464  | 3.376125  | 2.576500  |
| 6 | 1.806609  | 4.145364  | 3.110882  |
| 1 | -0.282012 | 4.183665  | 3.652054  |
| 1 | 3.830803  | 3.804393  | 2.481744  |
| 1 | 2.007604  | 5.165422  | 3.427515  |
| 6 | -0.053240 | -0.627035 | 2.568136  |
| 8 | -1.169630 | -0.181272 | 2.759219  |
| 8 | 0.323860  | -1.848604 | 2.987867  |
| 8 | 3.581351  | 1.274653  | 1.636865  |
| 6 | 4.913988  | 1.760277  | 1.584497  |
| 1 | 5.507319  | 0.942510  | 1.172299  |
| 1 | 4.990816  | 2.632963  | 0.925751  |
| 1 | 5.285989  | 2.017332  | 2.584697  |
| 7 | 3.148347  | -1.720177 | 1.843216  |
| 7 | 2.462316  | -0.910139 | 2.178922  |
| 6 | 0.044593  | -0.348605 | -2.515921 |
| 1 | -1.040438 | -0.477755 | -2.587762 |
| 1 | 0.330397  | 0.566337  | -3.046021 |
| 1 | 0.536933  | -1.206228 | -2.987445 |
| 6 | -4.372332 | 2.454275  | 0.132497  |
| 1 | -4.709553 | 1.752574  | 0.904945  |
| 1 | -4.567105 | 3.459250  | 0.520666  |
| 6 | -5.245958 | 2.256768  | -1.135667 |
| 1 | -5.153798 | 1.238752  | -1.517245 |
| 1 | -4.906961 | 2.949521  | -1.914063 |
| 6 | -6.691578 | 2.588740  | -0.842021 |
| 8 | -7.109901 | 3.663120  | -0.478860 |
| 8 | -7.536112 | 1.520052  | -1.007728 |
| 1 | -8.430894 | 1.847237  | -0.790745 |
| 6 | -4.285151 | -2.945106 | 0.345237  |
| 1 | -4.686844 | -2.159997 | 0.992263  |
| 1 | -4.510300 | -3.894352 | 0.842991  |
| 6 | -5.025529 | -2.908509 | -1.027467 |
| 1 | -4.373598 | -2.431300 | -1.770287 |
| 1 | -5.246663 | -3.913916 | -1.392485 |
| 6 | -6.317514 | -2.116284 | -1.048157 |
| 8 | -7.361532 | -2.470083 | -1.548549 |
| 8 | -6.152559 | -0.895011 | -0.478953 |
| 1 | -6.950011 | -0.349691 | -0.645778 |
| 6 | -1.967309 | -5.221661 | 0.215695  |

|   |           |           |           |
|---|-----------|-----------|-----------|
| 1 | -2.993182 | -5.509708 | 0.464790  |
| 1 | -1.714857 | -5.703193 | -0.738319 |
| 1 | -1.308883 | -5.657894 | 0.977844  |
| 6 | -2.170231 | 4.729015  | -0.505562 |
| 1 | -1.937875 | 5.087903  | -1.516856 |
| 1 | -3.203605 | 5.014789  | -0.287584 |
| 1 | -1.521061 | 5.279916  | 0.186819  |
| 6 | 3.286150  | -5.195241 | -0.916799 |
| 1 | 2.714565  | -5.630107 | -0.089556 |
| 1 | 2.974965  | -5.713949 | -1.834377 |
| 1 | 4.343180  | -5.430261 | -0.755111 |
| 6 | 5.246140  | 2.422348  | -2.407811 |
| 1 | 6.006953  | 2.064099  | -1.701133 |
| 1 | 5.375506  | 1.846359  | -3.333023 |
| 1 | 5.479667  | 3.467018  | -2.631449 |
| 6 | 5.373601  | -2.898042 | -1.826356 |
| 6 | 5.912216  | -3.946630 | -2.468733 |
| 1 | 6.030637  | -2.058900 | -1.597056 |
| 1 | 6.967573  | -3.959221 | -2.725653 |
| 1 | 5.327049  | -4.806236 | -2.779651 |
| 6 | 3.147135  | 4.703307  | -1.745061 |
| 6 | 2.675258  | 5.679915  | -0.954478 |
| 1 | 3.779490  | 4.992664  | -2.585011 |
| 1 | 2.893218  | 6.722754  | -1.167325 |
| 1 | 2.087063  | 5.473657  | -0.065202 |
| 6 | -0.691471 | -2.625672 | 3.668398  |
| 1 | -1.056601 | -2.052333 | 4.526187  |
| 1 | -1.527835 | -2.781721 | 2.981846  |
| 6 | -0.045574 | -3.933548 | 4.086155  |
| 1 | 0.795997  | -3.758659 | 4.764350  |
| 1 | -0.779966 | -4.561445 | 4.602676  |
| 1 | 0.323629  | -4.478148 | 3.211237  |

-----  
**Cr(Me)**  
 -----

Number of imaginary frequencies: 0    Electronic energy:    HF=-2741.0240614  
 Zero-point correction=                    0.853187 (Hartree/Particle)  
 Thermal correction to Energy=            0.914977  
 Thermal correction to Enthalpy=         0.915922  
 Thermal correction to Gibbs Free Energy= 0.749483  
 Sum of electronic and zero-point Energies= -2740.170874  
 Sum of electronic and thermal Energies= -2740.109084  
 Sum of electronic and thermal Enthalpies= -2740.108140  
 Sum of electronic and thermal Free Energies= -2740.274578

-----  
 Cartesian Coordinates  
 -----

|   |          |           |           |
|---|----------|-----------|-----------|
| 6 | 3.158903 | -3.247025 | -1.472178 |
| 6 | 1.917100 | -2.674204 | -0.998230 |
| 7 | 1.981269 | -1.305922 | -1.076785 |

|    |           |           |           |
|----|-----------|-----------|-----------|
| 6  | 3.196865  | -0.975330 | -1.609836 |
| 6  | 3.953564  | -2.192211 | -1.878740 |
| 6  | 0.800908  | -3.405866 | -0.590476 |
| 6  | -0.458795 | -2.904991 | -0.276604 |
| 7  | -0.788674 | -1.577504 | -0.228923 |
| 6  | -2.139669 | -1.493988 | -0.016132 |
| 6  | -2.693035 | -2.837890 | 0.103566  |
| 6  | -1.648318 | -3.711755 | -0.044357 |
| 6  | -2.872369 | -0.312457 | 0.073347  |
| 6  | -2.382258 | 0.989248  | -0.017553 |
| 7  | -1.079140 | 1.325971  | -0.246798 |
| 6  | -0.995567 | 2.689511  | -0.282913 |
| 6  | -2.312215 | 3.257871  | -0.042830 |
| 6  | -3.173402 | 2.202822  | 0.121723  |
| 6  | 0.159983  | 3.423347  | -0.547339 |
| 6  | 1.418806  | 2.925174  | -0.881196 |
| 7  | 1.735194  | 1.598999  | -0.986479 |
| 6  | 2.979502  | 1.509835  | -1.552275 |
| 6  | 3.505051  | 2.840148  | -1.783680 |
| 6  | 2.556444  | 3.728041  | -1.328742 |
| 77 | 0.498486  | 0.006275  | -0.535785 |
| 6  | 3.640641  | 0.321978  | -1.857506 |
| 1  | 0.052183  | 4.500969  | -0.567999 |
| 1  | 4.609009  | 0.422619  | -2.335217 |
| 1  | 0.904087  | -4.485416 | -0.592997 |
| 1  | -3.937760 | -0.417126 | 0.239223  |
| 6  | 0.876673  | 0.200711  | 1.470902  |
| 6  | 1.741717  | 1.165764  | 2.153254  |
| 6  | 1.171259  | 2.182302  | 2.951794  |
| 6  | 3.157055  | 1.153134  | 2.001404  |
| 6  | 1.946121  | 3.203436  | 3.493572  |
| 1  | 0.096222  | 2.176781  | 3.093433  |
| 6  | 3.934423  | 2.168107  | 2.570665  |
| 6  | 3.327138  | 3.194521  | 3.295971  |
| 1  | 1.476236  | 3.993774  | 4.071471  |
| 1  | 5.011812  | 2.161947  | 2.457324  |
| 1  | 3.946480  | 3.979828  | 3.721250  |
| 6  | -0.135095 | -0.366478 | 2.412619  |
| 8  | -1.163676 | 0.186036  | 2.759195  |
| 8  | 0.246007  | -1.585560 | 2.839037  |
| 8  | 3.677947  | 0.077402  | 1.363689  |
| 6  | 5.088818  | -0.031694 | 1.250912  |
| 1  | 5.269804  | -0.968918 | 0.724381  |
| 1  | 5.509547  | 0.798153  | 0.669460  |
| 1  | 5.563318  | -0.066432 | 2.239638  |
| 7  | 3.225787  | -3.645375 | 2.269009  |
| 7  | 3.661183  | -2.809993 | 2.846793  |
| 6  | -0.142187 | 0.072803  | -2.582439 |
| 1  | -1.144445 | -0.358385 | -2.687734 |
| 1  | -0.164561 | 1.106251  | -2.945810 |



|   |           |           |           |
|---|-----------|-----------|-----------|
| 1 | 0.554619  | -0.499770 | -3.206747 |
| 6 | -4.647490 | 2.252163  | 0.410076  |
| 1 | -4.915637 | 1.464737  | 1.124704  |
| 1 | -4.902880 | 3.203925  | 0.886973  |
| 6 | -5.534891 | 2.100060  | -0.855553 |
| 1 | -5.380962 | 1.125976  | -1.322829 |
| 1 | -5.264263 | 2.878129  | -1.577485 |
| 6 | -6.991962 | 2.301862  | -0.506263 |
| 8 | -7.484240 | 3.326221  | -0.094895 |
| 8 | -7.750355 | 1.170726  | -0.675404 |
| 1 | -8.660022 | 1.414102  | -0.414713 |
| 6 | -4.156409 | -3.133512 | 0.281159  |
| 1 | -4.587829 | -2.423938 | 0.993498  |
| 1 | -4.287880 | -4.126584 | 0.723590  |
| 6 | -4.956373 | -3.068198 | -1.057123 |
| 1 | -4.367370 | -2.510814 | -1.796641 |
| 1 | -5.131813 | -4.064017 | -1.469960 |
| 6 | -6.294145 | -2.359468 | -0.981178 |
| 8 | -7.335274 | -2.752020 | -1.458046 |
| 8 | -6.180035 | -1.162424 | -0.351357 |
| 1 | -7.016440 | -0.661131 | -0.453408 |
| 6 | -1.671824 | -5.211176 | -0.028916 |
| 1 | -2.655688 | -5.592053 | 0.261364  |
| 1 | -1.436680 | -5.631080 | -1.015921 |
| 1 | -0.938287 | -5.621915 | 0.676520  |
| 6 | -2.610575 | 4.726834  | 0.001098  |
| 1 | -2.470497 | 5.198347  | -0.980603 |
| 1 | -3.642607 | 4.917262  | 0.310117  |
| 1 | -1.953015 | 5.252271  | 0.704838  |
| 6 | 3.485416  | -4.709325 | -1.473585 |
| 1 | 2.998228  | -5.229833 | -0.642433 |
| 1 | 3.167667  | -5.204977 | -2.401586 |
| 1 | 4.565211  | -4.863651 | -1.378669 |
| 6 | 4.852742  | 3.140291  | -2.368142 |
| 1 | 5.666701  | 2.793310  | -1.717056 |
| 1 | 4.989386  | 2.651358  | -3.340989 |
| 1 | 4.994396  | 4.214776  | -2.514082 |
| 6 | 5.302640  | -2.207721 | -2.434352 |
| 6 | 5.878373  | -3.191822 | -3.143947 |
| 1 | 5.896991  | -1.312478 | -2.251437 |
| 1 | 6.901898  | -3.097008 | -3.494989 |
| 1 | 5.353463  | -4.100322 | -3.420613 |
| 6 | 2.672617  | 5.185039  | -1.311637 |
| 6 | 2.192850  | 6.015932  | -0.373632 |
| 1 | 3.238138  | 5.621221  | -2.135581 |
| 1 | 2.338310  | 7.089653  | -0.451445 |
| 1 | 1.671689  | 5.654586  | 0.508059  |
| 6 | -0.660675 | -2.247553 | 3.755025  |
| 1 | -0.833588 | -1.594716 | 4.616452  |
| 1 | -1.618427 | -2.396796 | 3.247565  |

|   |           |           |          |
|---|-----------|-----------|----------|
| 6 | -0.020478 | -3.563337 | 4.155317 |
| 1 | 0.937643  | -3.396485 | 4.657723 |
| 1 | -0.681273 | -4.103562 | 4.842489 |
| 1 | 0.155882  | -4.191642 | 3.276553 |

-----  
**TS(C-P)<sub>Ir(Me)</sub>**  
 -----

Number of imaginary frequencies: 1    Electronic energy:    HF=-2631.4739795  
 Zero-point correction=                    0.843160 (Hartree/Particle)  
 Thermal correction to Energy=            0.899862  
 Thermal correction to Enthalpy=         0.900806  
 Thermal correction to Gibbs Free Energy= 0.748437  
 Sum of electronic and zero-point Energies= -2630.630820  
 Sum of electronic and thermal Energies= -2630.574118  
 Sum of electronic and thermal Enthalpies= -2630.573173  
 Sum of electronic and thermal Free Energies= -2630.725542

.....  
 Cartesian Coordinates  
 .....

|    |           |           |           |
|----|-----------|-----------|-----------|
| 6  | 3.396672  | -3.497412 | -0.993282 |
| 6  | 2.119741  | -2.877918 | -0.703992 |
| 7  | 2.222673  | -1.510845 | -0.832955 |
| 6  | 3.504548  | -1.238167 | -1.238742 |
| 6  | 4.262992  | -2.480701 | -1.339155 |
| 6  | 0.948636  | -3.565085 | -0.391663 |
| 6  | -0.315763 | -3.022482 | -0.182636 |
| 7  | -0.614835 | -1.684705 | -0.209978 |
| 6  | -1.964537 | -1.565488 | -0.002276 |
| 6  | -2.549097 | -2.888439 | 0.179056  |
| 6  | -1.525683 | -3.791723 | 0.070468  |
| 6  | -2.669368 | -0.365131 | 0.028699  |
| 6  | -2.156743 | 0.914660  | -0.170949 |
| 7  | -0.843810 | 1.203569  | -0.434376 |
| 6  | -0.754520 | 2.554418  | -0.639486 |
| 6  | -2.063567 | 3.163126  | -0.467815 |
| 6  | -2.933432 | 2.147057  | -0.164716 |
| 6  | 0.412661  | 3.247972  | -0.955068 |
| 6  | 1.687095  | 2.717951  | -1.128396 |
| 7  | 1.994498  | 1.382845  | -1.058913 |
| 6  | 3.304747  | 1.243705  | -1.446168 |
| 6  | 3.869380  | 2.544310  | -1.745445 |
| 6  | 2.877746  | 3.471099  | -1.518663 |
| 77 | 0.695625  | -0.149561 | -0.599269 |
| 6  | 3.995460  | 0.033514  | -1.529483 |
| 1  | 0.313530  | 4.315550  | -1.110006 |
| 1  | 5.021814  | 0.091376  | -1.875324 |
| 1  | 1.021426  | -4.646515 | -0.344209 |
| 1  | -3.735951 | -0.436314 | 0.206842  |
| 6  | 0.240920  | -0.293316 | -2.643178 |
| 1  | -0.560669 | -1.022335 | -2.806153 |

|   |           |           |           |
|---|-----------|-----------|-----------|
| 1 | -0.078247 | 0.682397  | -3.025504 |
| 1 | 1.134334  | -0.614425 | -3.191157 |
| 6 | -4.404288 | 2.251277  | 0.126765  |
| 1 | -4.683897 | 1.534254  | 0.907964  |
| 1 | -4.636615 | 3.246262  | 0.520501  |
| 6 | -5.303884 | 2.009729  | -1.116167 |
| 1 | -5.177092 | 0.993817  | -1.493669 |
| 1 | -5.018474 | 2.713268  | -1.905561 |
| 6 | -6.752760 | 2.280262  | -0.779104 |
| 8 | -7.216437 | 3.352225  | -0.467782 |
| 8 | -7.538648 | 1.156875  | -0.829216 |
| 1 | -8.439801 | 1.445922  | -0.586256 |
| 6 | -4.016711 | -3.141977 | 0.380806  |
| 1 | -4.426447 | -2.383903 | 1.054603  |
| 1 | -4.166151 | -4.104843 | 0.880605  |
| 6 | -4.824992 | -3.136719 | -0.953635 |
| 1 | -4.232146 | -2.631598 | -1.726930 |
| 1 | -5.020503 | -4.150512 | -1.309965 |
| 6 | -6.149681 | -2.401640 | -0.908838 |
| 8 | -7.199966 | -2.799631 | -1.360522 |
| 8 | -6.011691 | -1.175457 | -0.342734 |
| 1 | -6.839742 | -0.666140 | -0.469839 |
| 6 | -1.583385 | -5.287913 | 0.155930  |
| 1 | -2.581542 | -5.633004 | 0.442120  |
| 1 | -1.336941 | -5.759663 | -0.804586 |
| 1 | -0.875044 | -5.681511 | 0.896266  |
| 6 | -2.346946 | 4.629680  | -0.602802 |
| 1 | -2.184136 | 4.980150  | -1.630535 |
| 1 | -3.382237 | 4.864661  | -0.338229 |
| 1 | -1.695686 | 5.229531  | 0.045507  |
| 6 | 3.682988  | -4.964565 | -0.888856 |
| 1 | 3.085569  | -5.435868 | -0.100856 |
| 1 | 3.463910  | -5.497828 | -1.824471 |
| 1 | 4.739585  | -5.137375 | -0.659067 |
| 6 | 5.285630  | 2.784491  | -2.174644 |
| 1 | 6.003128  | 2.479220  | -1.401132 |
| 1 | 5.533829  | 2.220329  | -3.082848 |
| 1 | 5.465986  | 3.843015  | -2.381159 |
| 6 | 5.674102  | -2.547059 | -1.704493 |
| 6 | 6.309556  | -3.568644 | -2.300665 |
| 1 | 6.264531  | -1.662503 | -1.464523 |
| 1 | 7.374052  | -3.514897 | -2.509896 |
| 1 | 5.797036  | -4.469924 | -2.621203 |
| 6 | 3.007097  | 4.922183  | -1.645818 |
| 6 | 2.430330  | 5.852326  | -0.869474 |
| 1 | 3.671686  | 5.265304  | -2.439214 |
| 1 | 2.599303  | 6.910421  | -1.048347 |
| 1 | 1.803351  | 5.593513  | -0.021300 |
| 6 | 1.126998  | 0.089640  | 1.739563  |
| 6 | 1.280596  | 1.419826  | 2.353147  |

|   |           |           |          |
|---|-----------|-----------|----------|
| 6 | 0.291614  | -0.837361 | 2.552205 |
| 6 | 0.203037  | 2.308987  | 2.544201 |
| 6 | 2.524219  | 1.831115  | 2.882324 |
| 8 | -0.835033 | -0.566930 | 2.927083 |
| 8 | 0.906946  | -2.020413 | 2.782277 |
| 6 | 0.394844  | 3.554543  | 3.133833 |
| 1 | -0.779311 | 2.006947  | 2.205964 |
| 6 | 2.733142  | 3.071033  | 3.478833 |
| 8 | 3.529660  | 0.873124  | 2.980807 |
| 6 | 1.659346  | 3.949042  | 3.587904 |
| 1 | -0.452146 | 4.226908  | 3.238047 |
| 1 | 3.717654  | 3.316224  | 3.863518 |
| 6 | 3.552014  | -0.012320 | 1.977561 |
| 1 | 1.802326  | 4.924036  | 4.044264 |
| 1 | 4.027491  | -0.952260 | 2.248764 |
| 1 | 3.731801  | 0.380892  | 0.976436 |
| 1 | 2.221046  | -0.379825 | 1.576888 |
| 6 | 0.138960  | -3.016512 | 3.499350 |
| 1 | -0.898911 | -2.968251 | 3.162736 |
| 1 | 0.576280  | -3.967489 | 3.185094 |
| 6 | 0.246007  | -2.822637 | 5.005063 |
| 1 | -0.209052 | -1.873954 | 5.302934 |
| 1 | -0.277813 | -3.634099 | 5.524007 |
| 1 | 1.293111  | -2.829563 | 5.326288 |

---

**AIr(his)**

---

Number of imaginary frequencies: 0    Electronic energy:    HF=-2165.6403788  
Zero-point correction=                    0.672835 (Hartree/Particle)  
Thermal correction to Energy=            0.718515  
Thermal correction to Enthalpy=         0.719459  
Thermal correction to Gibbs Free Energy= 0.588480  
Sum of electronic and zero-point Energies= -2164.967544  
Sum of electronic and thermal Energies= -2164.921864  
Sum of electronic and thermal Enthalpies= -2164.920920  
Sum of electronic and thermal Free Energies= -2165.051899

.....  
Cartesian Coordinates

|   |          |           |           |
|---|----------|-----------|-----------|
| 6 | 4.250683 | -2.724075 | -0.774294 |
| 6 | 3.631594 | -1.422015 | -0.564320 |
| 7 | 2.263649 | -1.570712 | -0.497930 |
| 6 | 1.996639 | -2.918647 | -0.615863 |
| 6 | 3.231629 | -3.651232 | -0.776919 |
| 6 | 4.306849 | -0.218722 | -0.398855 |
| 6 | 3.749912 | 1.047098  | -0.238972 |
| 7 | 2.397142 | 1.312553  | -0.196936 |
| 6 | 2.258574 | 2.674047  | -0.055132 |
| 6 | 3.571748 | 3.298730  | -0.014226 |

|    |           |           |           |
|----|-----------|-----------|-----------|
| 6  | 4.497540  | 2.281577  | -0.131922 |
| 6  | 1.040045  | 3.341412  | 0.049468  |
| 6  | -0.233264 | 2.781974  | -0.000879 |
| 7  | -0.498491 | 1.433894  | -0.118742 |
| 6  | -1.868354 | 1.293640  | -0.115567 |
| 6  | -2.493718 | 2.600614  | -0.011855 |
| 6  | -1.479213 | 3.521920  | 0.061324  |
| 6  | -2.542613 | 0.079655  | -0.201471 |
| 6  | -1.982664 | -1.186899 | -0.331557 |
| 7  | -0.631495 | -1.447868 | -0.382624 |
| 6  | -0.492803 | -2.812641 | -0.520022 |
| 6  | -1.802096 | -3.435494 | -0.572474 |
| 6  | -2.726811 | -2.428701 | -0.457983 |
| 7  | 0.948825  | -0.250080 | 1.812370  |
| 6  | 1.012039  | 0.762490  | 2.674686  |
| 7  | 1.039441  | 0.263305  | 3.927332  |
| 6  | 0.992268  | -1.114017 | 3.863243  |
| 6  | 0.935631  | -1.431006 | 2.535842  |
| 6  | 0.722274  | -3.482764 | -0.607645 |
| 1  | -3.625623 | 0.127884  | -0.181155 |
| 1  | 0.672917  | -4.561862 | -0.707449 |
| 1  | 5.388039  | -0.277743 | -0.401436 |
| 1  | 1.086679  | 4.418111  | 0.169034  |
| 1  | 1.037809  | 1.809479  | 2.417550  |
| 1  | 1.003136  | -1.735391 | 4.744628  |
| 1  | 0.887963  | -2.391066 | 2.048634  |
| 1  | 1.087268  | 0.818548  | 4.771042  |
| 77 | 0.886799  | -0.081115 | -0.166704 |
| 6  | -2.036612 | -4.906503 | -0.742383 |
| 1  | -3.102406 | -5.131750 | -0.830966 |
| 1  | -1.543782 | -5.291560 | -1.643433 |
| 1  | -1.649892 | -5.480734 | 0.109403  |
| 6  | 3.328133  | -5.133138 | -0.979166 |
| 1  | 2.862092  | -5.439975 | -1.924280 |
| 1  | 4.369470  | -5.462393 | -1.011537 |
| 1  | 2.828026  | -5.686991 | -0.175121 |
| 6  | 5.989376  | 2.392055  | -0.209273 |
| 1  | 6.416428  | 1.638694  | -0.879112 |
| 1  | 6.282673  | 3.377951  | -0.582004 |
| 1  | 6.463720  | 2.259677  | 0.772380  |
| 6  | -1.578671 | 5.014723  | 0.159608  |
| 1  | -1.212802 | 5.504268  | -0.752017 |
| 1  | -2.613000 | 5.334858  | 0.309731  |
| 1  | -0.988975 | 5.408057  | 0.996762  |
| 6  | 5.676938  | -3.003805 | -0.953913 |
| 6  | 6.553041  | -2.266386 | -1.651245 |
| 1  | 6.033358  | -3.926979 | -0.498170 |
| 1  | 7.592516  | -2.568450 | -1.734612 |
| 1  | 6.263083  | -1.368571 | -2.189613 |
| 6  | 3.785905  | 4.741445  | 0.080192  |

|   |           |           |           |
|---|-----------|-----------|-----------|
| 6 | 4.821847  | 5.352480  | 0.673959  |
| 1 | 3.022679  | 5.366938  | -0.381757 |
| 1 | 4.903273  | 6.435122  | 0.674159  |
| 1 | 5.605450  | 4.806998  | 1.190552  |
| 6 | -4.225246 | -2.538551 | -0.453342 |
| 6 | -4.823936 | -2.588428 | 0.963695  |
| 1 | -4.536373 | -3.434966 | -0.998501 |
| 1 | -4.675780 | -1.701750 | -0.997789 |
| 1 | -4.462216 | -3.463329 | 1.517261  |
| 1 | -4.519510 | -1.716875 | 1.557562  |
| 6 | -6.339955 | -2.630082 | 0.935210  |
| 8 | -7.024258 | -2.563588 | -0.061094 |
| 8 | -6.851863 | -2.746410 | 2.181285  |
| 1 | -7.823566 | -2.758678 | 2.083737  |
| 6 | -3.975381 | 2.847383  | -0.019813 |
| 6 | -4.570469 | 2.924289  | -1.437453 |
| 1 | -4.201152 | 3.779370  | 0.508326  |
| 1 | -4.501842 | 2.066238  | 0.538879  |
| 1 | -4.154751 | 3.767445  | -2.001088 |
| 1 | -4.322502 | 2.028334  | -2.021543 |
| 6 | -6.081278 | 3.055724  | -1.405039 |
| 8 | -6.770249 | 2.966509  | -0.412804 |
| 8 | -6.582863 | 3.276885  | -2.639567 |
| 1 | -7.553045 | 3.333283  | -2.542593 |

---

**B<sub>r</sub>(his)**

---

Number of imaginary frequencies: 0    Electronic energy:    HF=-2927.186901  
Zero-point correction=                    0.897181 (Hartree/Particle)  
Thermal correction to Energy=            0.958570  
Thermal correction to Enthalpy=         0.959514  
Thermal correction to Gibbs Free Energy= 0.798421  
Sum of electronic and zero-point Energies= -2926.289720  
Sum of electronic and thermal Energies= -2926.228331  
Sum of electronic and thermal Enthalpies= -2926.227387  
Sum of electronic and thermal Free Energies= -2926.388480

---

Cartesian Coordinates

---

|   |          |           |          |
|---|----------|-----------|----------|
| 6 | 3.028252 | 2.350044  | 1.950906 |
| 6 | 2.506077 | 1.068331  | 1.524529 |
| 7 | 1.235924 | 1.229798  | 1.024239 |
| 6 | 0.912314 | 2.560435  | 1.141059 |
| 6 | 2.051955 | 3.286094  | 1.690818 |
| 6 | 3.190051 | -0.143438 | 1.603146 |
| 6 | 2.755577 | -1.390429 | 1.162580 |
| 7 | 1.533933 | -1.643608 | 0.594987 |
| 6 | 1.481228 | -2.989092 | 0.315229 |
| 6 | 2.729286 | -3.619304 | 0.699045 |
| 6 | 3.522153 | -2.629189 | 1.239300 |

|   |           |           |           |
|---|-----------|-----------|-----------|
| 6 | 0.379026  | -3.648242 | -0.228876 |
| 6 | -0.854321 | -3.094234 | -0.568881 |
| 7 | -1.189063 | -1.767555 | -0.439094 |
| 6 | -2.484457 | -1.625887 | -0.876553 |
| 6 | -2.994384 | -2.919481 | -1.307856 |
| 6 | -1.982086 | -3.827514 | -1.113985 |
| 7 | -1.486808 | 1.097289  | 0.007589  |
| 6 | -2.750244 | 0.822577  | -0.456377 |
| 6 | -3.551973 | 2.034305  | -0.409968 |
| 6 | -2.746908 | 3.028455  | 0.089471  |
| 6 | -1.452131 | 2.428106  | 0.349549  |
| 6 | -3.191266 | -0.425617 | -0.894336 |
| 6 | -0.342349 | 3.098439  | 0.863684  |
| 8 | 5.750714  | -0.335001 | -1.191144 |
| 6 | 5.020439  | 0.799371  | -1.265151 |
| 8 | 5.395391  | 1.889840  | -0.871784 |
| 6 | 3.704422  | 0.552422  | -1.879662 |
| 7 | 3.464550  | -0.693138 | -2.235308 |
| 7 | 3.284147  | -1.772451 | -2.542988 |
| 6 | 2.707746  | 1.600377  | -2.176036 |
| 6 | 3.136362  | 2.898002  | -2.516391 |
| 6 | 2.223869  | 3.892232  | -2.857975 |
| 6 | 0.854936  | 3.618647  | -2.882489 |
| 6 | 0.402965  | 2.348390  | -2.528857 |
| 6 | 1.319773  | 1.366736  | -2.164998 |
| 8 | 0.851136  | 0.086275  | -1.790994 |
| 6 | 0.249017  | -0.653203 | -2.890872 |
| 1 | -0.468631 | 4.152138  | 1.081619  |
| 1 | -4.203317 | -0.470350 | -1.276548 |
| 1 | 0.486013  | -4.715261 | -0.389315 |
| 1 | 4.174878  | -0.105349 | 2.053954  |
| 1 | 4.196567  | 3.115168  | -2.506278 |
| 1 | 2.588995  | 4.879273  | -3.125398 |
| 1 | -0.656617 | 2.118181  | -2.515461 |
| 1 | 0.142232  | 4.385716  | -3.170020 |
| 1 | 0.262217  | -1.703496 | -2.609034 |
| 1 | -0.776234 | -0.316145 | -3.057803 |
| 1 | 0.853222  | -0.489085 | -3.785522 |
| 6 | 7.109769  | -0.210086 | -0.692778 |
| 1 | 7.338006  | -1.205033 | -0.304207 |
| 1 | 7.118007  | 0.513106  | 0.126015  |
| 6 | 8.069930  | 0.194093  | -1.800210 |
| 1 | 7.836203  | 1.196534  | -2.170035 |
| 1 | 9.094941  | 0.203454  | -1.413039 |
| 1 | 8.024621  | -0.513644 | -2.633965 |
| 6 | 4.413121  | 2.581659  | 2.472087  |
| 1 | 4.514302  | 3.580884  | 2.904058  |
| 1 | 4.685539  | 1.855252  | 3.246865  |
| 1 | 5.145670  | 2.499070  | 1.659110  |
| 6 | 3.063508  | -5.063482 | 0.482996  |

|   |           |           |           |
|---|-----------|-----------|-----------|
| 1 | 4.145801  | -5.197749 | 0.394386  |
| 1 | 2.724540  | -5.696409 | 1.314355  |
| 1 | 2.602118  | -5.451652 | -0.431102 |
| 6 | 2.151786  | 4.727968  | 1.919274  |
| 6 | 1.654846  | 5.696681  | 1.136229  |
| 1 | 2.722663  | 5.023999  | 2.799029  |
| 1 | 1.792960  | 6.743494  | 1.389473  |
| 1 | 1.137411  | 5.483155  | 0.205428  |
| 6 | 4.884554  | -2.712303 | 1.759635  |
| 6 | 5.440919  | -3.767574 | 2.373125  |
| 1 | 5.494012  | -1.818670 | 1.631515  |
| 1 | 6.472187  | -3.735027 | 2.711482  |
| 1 | 4.892089  | -4.680866 | 2.580017  |
| 6 | -3.089276 | 4.466006  | 0.346323  |
| 1 | -4.085346 | 4.713142  | -0.031164 |
| 1 | -3.077407 | 4.703231  | 1.418006  |
| 1 | -2.376599 | 5.143901  | -0.138894 |
| 6 | -5.011741 | 2.121778  | -0.754427 |
| 1 | -5.242086 | 3.116803  | -1.152241 |
| 1 | -5.270225 | 1.408344  | -1.543564 |
| 6 | -4.370897 | -3.200897 | -1.847423 |
| 1 | -4.334371 | -4.139900 | -2.407896 |
| 1 | -4.674380 | -2.434317 | -2.568846 |
| 6 | -5.485549 | -3.337476 | -0.768581 |
| 1 | -5.116505 | -3.873640 | 0.108455  |
| 1 | -6.312112 | -3.910232 | -1.204671 |
| 6 | -5.913684 | 1.848338  | 0.482180  |
| 1 | -5.683175 | 0.859633  | 0.894963  |
| 1 | -5.744286 | 2.605313  | 1.251434  |
| 6 | -6.053355 | -2.006531 | -0.313278 |
| 8 | -5.969119 | -1.558670 | 0.815924  |
| 8 | -6.651411 | -1.365855 | -1.331397 |
| 1 | -7.074299 | -0.525528 | -1.009559 |
| 6 | -7.370588 | 1.826248  | 0.093015  |
| 8 | -7.883486 | 0.985653  | -0.631964 |
| 8 | -8.077553 | 2.846216  | 0.598117  |
| 1 | -8.999155 | 2.743087  | 0.287629  |
| 6 | -1.975678 | -5.302942 | -1.383857 |
| 1 | -1.879047 | -5.882607 | -0.456792 |
| 1 | -2.897347 | -5.626996 | -1.873548 |
| 1 | -1.140272 | -5.591491 | -2.033498 |
| 7 | -0.671617 | -0.623919 | 2.160706  |
| 6 | -1.014022 | 0.303344  | 3.050861  |
| 6 | -0.888129 | -1.862524 | 2.741061  |
| 7 | -1.441583 | -0.302227 | 4.178165  |
| 1 | -0.960987 | 1.369551  | 2.901955  |
| 6 | -1.370792 | -1.669016 | 4.003718  |
| 1 | -0.684201 | -2.777753 | 2.211296  |
| 1 | -1.763590 | 0.176439  | 5.007855  |
| 1 | -1.664970 | -2.366742 | 4.771430  |



77 0.023220 -0.271969 0.303713

---

**B'<sub>Ir(his)</sub>**

---

Number of imaginary frequencies: 0    Electronic energy:    HF=-2927.1665817  
Zero-point correction=                    0.895162 (Hartree/Particle)  
Thermal correction to Energy=            0.957147  
Thermal correction to Enthalpy=           0.958091  
Thermal correction to Gibbs Free Energy= 0.795187  
Sum of electronic and zero-point Energies= -2926.271420  
Sum of electronic and thermal Energies= -2926.209435  
Sum of electronic and thermal Enthalpies= -2926.208491  
Sum of electronic and thermal Free Energies= -2926.371395

.....  
Cartesian Coordinates

.....  
6    3.169142 -3.688508 -0.628954  
6    1.924945 -3.007397 -0.334721  
7    2.077031 -1.653706 -0.541963  
6    3.357883 -1.448628 -0.993915  
6    4.060722 -2.723834 -1.053767  
6    0.731908 -3.628130 0.041694  
6    -0.509916 -3.023726 0.232735  
7    -0.756581 -1.674864 0.134571  
6    -2.104932 -1.488147 0.309786  
6    -2.743067 -2.774553 0.548219  
6    -1.754011 -3.725316 0.506816  
6    -2.758634 -0.258204 0.272731  
6    -2.190797 0.992620 0.038881  
7    -0.864280 1.223402 -0.221506  
6    -0.716770 2.565548 -0.461746  
6    -2.001802 3.228607 -0.313786  
6    -2.915081 2.255569 0.004035  
6    0.474937 3.195808 -0.816233  
6    1.719843 2.597548 -1.005277  
7    1.966790 1.252945 -0.895024  
6    3.255212 1.028959 -1.313114  
6    3.867223 2.285672 -1.691992  
6    2.930568 3.270982 -1.468446  
6    3.886755 -0.213097 -1.360311  
1    0.423114 4.261927 -0.999509  
1    4.904154 -0.216238 -1.735016  
1    0.762951 -4.706997 0.149398  
1    -3.830088 -0.279144 0.432783  
6    1.104472 0.182839 1.899099  
6    1.186687 1.655955 2.316190  
6    0.022806 2.328436 2.712931  
6    2.400722 2.386475 2.311906  
6    0.049930 3.664875 3.112337  
1    -0.916470 1.796480 2.715385

|   |           |           |           |
|---|-----------|-----------|-----------|
| 6 | 2.426418  | 3.723485  | 2.722209  |
| 6 | 1.253445  | 4.362008  | 3.123232  |
| 1 | -0.872578 | 4.146743  | 3.420747  |
| 1 | 3.362099  | 4.268836  | 2.729984  |
| 1 | 1.291997  | 5.398726  | 3.445168  |
| 6 | 0.103958  | -0.654817 | 2.734383  |
| 8 | -1.028592 | -0.303798 | 2.960185  |
| 8 | 0.642833  | -1.800168 | 3.164649  |
| 8 | 3.518135  | 1.722159  | 1.898272  |
| 6 | 4.780076  | 2.382041  | 1.938555  |
| 1 | 5.507510  | 1.645046  | 1.594890  |
| 1 | 4.792320  | 3.248215  | 1.267833  |
| 1 | 5.031812  | 2.695969  | 2.958407  |
| 7 | 3.253070  | -1.121786 | 2.052807  |
| 7 | 2.347468  | -0.473162 | 2.038213  |
| 6 | -4.382141 | 2.425031  | 0.285262  |
| 1 | -4.687050 | 1.748921  | 1.092929  |
| 1 | -4.577757 | 3.440100  | 0.644152  |
| 6 | -5.289095 | 2.172749  | -0.946855 |
| 1 | -5.189418 | 1.146607  | -1.304605 |
| 1 | -4.995910 | 2.850656  | -1.756417 |
| 6 | -6.731756 | 2.483225  | -0.605289 |
| 8 | -7.146525 | 3.554221  | -0.234250 |
| 8 | -7.556798 | 1.397734  | -0.737879 |
| 1 | -8.455913 | 1.700792  | -0.501620 |
| 6 | -4.222544 | -2.962548 | 0.738753  |
| 1 | -4.614496 | -2.151733 | 1.358944  |
| 1 | -4.411344 | -3.886348 | 1.294435  |
| 6 | -5.010002 | -3.012669 | -0.606555 |
| 1 | -4.378470 | -2.612265 | -1.410480 |
| 1 | -5.267257 | -4.037149 | -0.883687 |
| 6 | -6.288247 | -2.195031 | -0.647925 |
| 8 | -7.336743 | -2.554558 | -1.128734 |
| 8 | -6.097768 | -0.952855 | -0.132431 |
| 1 | -6.896903 | -0.408376 | -0.303531 |
| 6 | -1.877884 | -5.211634 | 0.670357  |
| 1 | -2.891852 | -5.496122 | 0.964476  |
| 1 | -1.647919 | -5.744712 | -0.261426 |
| 1 | -1.193490 | -5.596527 | 1.436467  |
| 6 | -2.218742 | 4.703674  | -0.471444 |
| 1 | -2.001429 | 5.039401  | -1.493504 |
| 1 | -3.252212 | 4.983031  | -0.249804 |
| 1 | -1.568857 | 5.276738  | 0.201303  |
| 6 | 3.406403  | -5.157623 | -0.452228 |
| 1 | 2.824817  | -5.563180 | 0.382401  |
| 1 | 3.135705  | -5.733766 | -1.347569 |
| 1 | 4.463891  | -5.354206 | -0.250462 |
| 6 | 5.272259  | 2.438111  | -2.193232 |
| 1 | 6.007933  | 2.099222  | -1.452298 |
| 1 | 5.441939  | 1.851416  | -3.104697 |

|    |           |           |           |
|----|-----------|-----------|-----------|
| 1  | 5.502466  | 3.481462  | -2.423040 |
| 6  | 5.457745  | -2.866257 | -1.456903 |
| 6  | 6.013188  | -3.933829 | -2.049779 |
| 1  | 6.100157  | -2.010774 | -1.250717 |
| 1  | 7.071101  | -3.946581 | -2.293721 |
| 1  | 5.440883  | -4.812306 | -2.330512 |
| 6  | 3.119164  | 4.709008  | -1.669226 |
| 6  | 2.626568  | 5.691911  | -0.900447 |
| 1  | 3.753001  | 4.987170  | -2.510798 |
| 1  | 2.831554  | 6.733314  | -1.129983 |
| 1  | 2.036280  | 5.494085  | -0.010268 |
| 6  | -0.231093 | -2.671676 | 3.944044  |
| 1  | -0.609199 | -2.098149 | 4.794459  |
| 1  | -1.077840 | -2.949713 | 3.311393  |
| 6  | 0.593244  | -3.868522 | 4.373073  |
| 1  | 1.442968  | -3.562385 | 4.991133  |
| 1  | -0.030818 | -4.547893 | 4.963145  |
| 1  | 0.973242  | -4.415265 | 3.504179  |
| 7  | 0.131472  | -0.469549 | -2.336595 |
| 6  | 0.004385  | -1.638378 | -2.952957 |
| 6  | -0.103516 | 0.519745  | -3.274258 |
| 7  | -0.304334 | -1.431609 | -4.251614 |
| 1  | 0.128442  | -2.607606 | -2.497429 |
| 6  | -0.376942 | -0.071321 | -4.475669 |
| 1  | -0.058395 | 1.564517  | -3.015285 |
| 1  | -0.450306 | -2.157441 | -4.939390 |
| 1  | -0.610074 | 0.343697  | -5.443413 |
| 77 | 0.619521  | -0.201740 | -0.325698 |

---

**TS(B-C)<sub>Ir(his)</sub>**

---

Number of imaginary frequencies: 1    Electronic energy:    HF=-2927.1600184  
Zero-point correction=                    0.891808 (Hartree/Particle)  
Thermal correction to Energy=            0.954446  
Thermal correction to Enthalpy=         0.955390  
Thermal correction to Gibbs Free Energy= 0.788107  
Sum of electronic and zero-point Energies= -2926.268210  
Sum of electronic and thermal Energies= -2926.205573  
Sum of electronic and thermal Enthalpies= -2926.204629  
Sum of electronic and thermal Free Energies= -2926.371912

---

Cartesian Coordinates

---

|   |           |           |           |
|---|-----------|-----------|-----------|
| 6 | -3.970345 | -3.017875 | -0.401775 |
| 6 | -3.420907 | -1.666893 | -0.428367 |
| 7 | -2.050259 | -1.734913 | -0.328234 |
| 6 | -1.702961 | -3.066086 | -0.285536 |
| 6 | -2.896518 | -3.880333 | -0.341924 |
| 6 | -4.150151 | -0.496858 | -0.625327 |
| 6 | -3.660286 | 0.803820  | -0.736115 |

|    |           |           |           |
|----|-----------|-----------|-----------|
| 7  | -2.337680 | 1.165240  | -0.626742 |
| 6  | -2.257523 | 2.513314  | -0.866377 |
| 6  | -3.593167 | 3.043565  | -1.108807 |
| 6  | -4.464397 | 1.975188  | -1.021264 |
| 6  | -1.072877 | 3.247520  | -0.924735 |
| 6  | 0.224589  | 2.766132  | -0.768542 |
| 7  | 0.563188  | 1.454751  | -0.541790 |
| 6  | 1.930748  | 1.377906  | -0.529409 |
| 6  | 2.492743  | 2.705890  | -0.730073 |
| 6  | 1.433858  | 3.565171  | -0.878306 |
| 6  | 2.666361  | 0.201921  | -0.393329 |
| 6  | 2.174095  | -1.095894 | -0.276636 |
| 7  | 0.847862  | -1.439604 | -0.238449 |
| 6  | 0.779038  | -2.809829 | -0.201286 |
| 6  | 2.123783  | -3.363515 | -0.184699 |
| 6  | 2.990215  | -2.301596 | -0.223796 |
| 77 | -0.747430 | -0.133957 | -0.340400 |
| 7  | -0.651906 | -0.332827 | -2.485307 |
| 6  | -0.736757 | 0.659124  | -3.361685 |
| 7  | -0.630932 | 0.170973  | -4.617492 |
| 6  | -0.471168 | -1.198042 | -4.542278 |
| 6  | -0.485204 | -1.499266 | -3.209133 |
| 6  | -0.396786 | -3.554510 | -0.216267 |
| 1  | 3.745353  | 0.306525  | -0.406442 |
| 1  | -0.287611 | -4.633905 | -0.200636 |
| 1  | -5.216811 | -0.624359 | -0.760598 |
| 1  | -1.169213 | 4.307843  | -1.128752 |
| 1  | -0.868451 | 1.702257  | -3.123188 |
| 1  | -0.366000 | -1.816995 | -5.419237 |
| 1  | -0.390795 | -2.455821 | -2.722539 |
| 1  | -0.664144 | 0.722358  | -5.463602 |
| 6  | -0.745119 | 0.204793  | 1.751923  |
| 6  | 0.553704  | 0.155736  | 2.541490  |
| 6  | 1.252450  | 1.349030  | 2.791917  |
| 6  | 1.131911  | -1.049136 | 3.016267  |
| 6  | 2.465527  | 1.359879  | 3.480155  |
| 1  | 0.839896  | 2.282005  | 2.437396  |
| 6  | 2.342003  | -1.033499 | 3.717172  |
| 6  | 3.010426  | 0.167560  | 3.945921  |
| 1  | 2.968665  | 2.305004  | 3.659004  |
| 1  | 2.766568  | -1.959597 | 4.084766  |
| 1  | 3.949640  | 0.162027  | 4.491238  |
| 6  | -1.622704 | 1.412819  | 2.144329  |
| 8  | -1.219890 | 2.548885  | 2.034390  |
| 8  | -2.841769 | 1.087891  | 2.581798  |
| 8  | 0.438215  | -2.197615 | 2.781398  |
| 6  | 0.861079  | -3.410746 | 3.396329  |
| 1  | 0.107381  | -4.153380 | 3.130373  |
| 1  | 1.836131  | -3.727978 | 3.009969  |
| 1  | 0.909814  | -3.308085 | 4.486607  |

|   |           |           |           |
|---|-----------|-----------|-----------|
| 7 | -1.702407 | -1.053616 | 2.425592  |
| 7 | -2.479744 | -1.837619 | 2.506117  |
| 6 | 2.443763  | -4.829057 | -0.159846 |
| 1 | 2.160320  | -5.322841 | -1.098597 |
| 1 | 3.513884  | -5.000147 | -0.013787 |
| 1 | 1.914217  | -5.350297 | 0.647144  |
| 6 | -2.914003 | -5.378889 | -0.296484 |
| 1 | -2.308434 | -5.816493 | -1.099870 |
| 1 | -2.514987 | -5.759146 | 0.652804  |
| 1 | -3.929968 | -5.768475 | -0.397019 |
| 6 | -5.956846 | 1.982540  | -1.157034 |
| 1 | -6.364495 | 2.960246  | -0.881761 |
| 1 | -6.278388 | 1.775898  | -2.186706 |
| 1 | -6.426369 | 1.228580  | -0.516630 |
| 6 | 1.457526  | 5.046684  | -1.108898 |
| 1 | 2.477976  | 5.410509  | -1.255996 |
| 1 | 0.877825  | 5.330135  | -1.996140 |
| 1 | 1.032528  | 5.593822  | -0.257752 |
| 6 | -5.383097 | -3.400035 | -0.443243 |
| 6 | -6.401523 | -2.771215 | 0.161261  |
| 1 | -5.605197 | -4.310648 | -0.998774 |
| 1 | -7.417355 | -3.144620 | 0.074851  |
| 1 | -6.257950 | -1.892262 | 0.783175  |
| 6 | -3.875844 | 4.455548  | -1.358924 |
| 6 | -4.877283 | 4.950488  | -2.102123 |
| 1 | -3.195999 | 5.164811  | -0.887667 |
| 1 | -5.012578 | 6.022512  | -2.209079 |
| 1 | -5.575915 | 4.317867  | -2.640530 |
| 6 | 4.492287  | -2.327609 | -0.248321 |
| 6 | 5.079126  | -2.253776 | -1.669002 |
| 1 | 4.859522  | -3.239531 | 0.233208  |
| 1 | 4.900712  | -1.503366 | 0.346576  |
| 1 | 4.740176  | -3.098829 | -2.280971 |
| 1 | 4.739582  | -1.353619 | -2.196563 |
| 6 | 3.960981  | 3.023494  | -0.755881 |
| 6 | 4.560734  | 3.225042  | 0.646890  |
| 1 | 4.139268  | 3.925999  | -1.349556 |
| 1 | 4.519549  | 2.229984  | -1.263648 |
| 1 | 4.120986  | 4.096509  | 1.146256  |
| 1 | 4.338374  | 2.369122  | 1.297357  |
| 6 | 6.595286  | -2.251967 | -1.656038 |
| 8 | 7.289200  | -2.290228 | -0.664339 |
| 8 | 7.098584  | -2.200165 | -2.910274 |
| 1 | 8.070974  | -2.197288 | -2.820067 |
| 6 | 6.065639  | 3.399734  | 0.602334  |
| 8 | 6.761878  | 3.259884  | -0.378684 |
| 8 | 6.560374  | 3.725630  | 1.818867  |
| 1 | 7.527670  | 3.807702  | 1.712267  |
| 6 | -3.723757 | 2.201656  | 2.921656  |
| 6 | -5.002379 | 1.609653  | 3.479184  |

|   |           |          |          |
|---|-----------|----------|----------|
| 1 | -3.894640 | 2.781922 | 2.011398 |
| 1 | -3.206149 | 2.836702 | 3.645263 |
| 1 | -5.693251 | 2.417853 | 3.740931 |
| 1 | -5.491126 | 0.965491 | 2.741395 |
| 1 | -4.806286 | 1.022249 | 4.381575 |

-----  
**C<sub>Ir(his)</sub>**  
 -----

Number of imaginary frequencies: 0    Electronic energy:    HF=-2927.2069843  
 Zero-point correction=                    0.891593 (Hartree/Particle)  
 Thermal correction to Energy=            0.956107  
 Thermal correction to Enthalpy=         0.957051  
 Thermal correction to Gibbs Free Energy= 0.783300  
 Sum of electronic and zero-point Energies= -2926.315391  
 Sum of electronic and thermal Energies= -2926.250877  
 Sum of electronic and thermal Enthalpies= -2926.249933  
 Sum of electronic and thermal Free Energies= -2926.423684

.....  
 Cartesian Coordinates  
 .....

|   |           |           |           |
|---|-----------|-----------|-----------|
| 6 | 3.189474  | -3.132326 | -1.360123 |
| 6 | 1.956085  | -2.591558 | -0.832772 |
| 7 | 1.984655  | -1.219038 | -0.914922 |
| 6 | 3.172920  | -0.858393 | -1.496526 |
| 6 | 3.938742  | -2.057592 | -1.803730 |
| 6 | 0.866900  | -3.348089 | -0.395303 |
| 6 | -0.398539 | -2.874083 | -0.059782 |
| 7 | -0.756405 | -1.548507 | -0.020637 |
| 6 | -2.108898 | -1.489502 | 0.210037  |
| 6 | -2.631185 | -2.841675 | 0.345420  |
| 6 | -1.569136 | -3.698048 | 0.192458  |
| 6 | -2.858920 | -0.319884 | 0.310082  |
| 6 | -2.389445 | 0.989153  | 0.227306  |
| 7 | -1.092398 | 1.352106  | -0.025758 |
| 6 | -1.024309 | 2.721968  | 0.005697  |
| 6 | -2.343591 | 3.259689  | 0.286819  |
| 6 | -3.189760 | 2.186693  | 0.422853  |
| 6 | 0.120791  | 3.480064  | -0.232491 |
| 6 | 1.378770  | 3.007146  | -0.605679 |
| 7 | 1.697418  | 1.684273  | -0.770600 |
| 6 | 2.928625  | 1.622255  | -1.376797 |
| 6 | 3.437036  | 2.962912  | -1.575007 |
| 6 | 2.498560  | 3.828864  | -1.056466 |
| 6 | 3.585697  | 0.449566  | -1.740842 |
| 1 | 0.004133  | 4.556314  | -0.199253 |
| 1 | 4.534654  | 0.572303  | -2.250448 |
| 1 | 0.996589  | -4.424543 | -0.391518 |
| 1 | -3.919723 | -0.442672 | 0.491756  |
| 6 | 0.890043  | 0.194222  | 1.581382  |
| 6 | 1.822476  | 1.066655  | 2.292486  |

|   |           |           |           |
|---|-----------|-----------|-----------|
| 6 | 1.285427  | 1.992442  | 3.221228  |
| 6 | 3.234463  | 1.043643  | 2.108339  |
| 6 | 2.088638  | 2.936770  | 3.846785  |
| 1 | 0.215260  | 1.991138  | 3.392857  |
| 6 | 4.037965  | 1.985367  | 2.762269  |
| 6 | 3.464761  | 2.933659  | 3.608114  |
| 1 | 1.646053  | 3.663842  | 4.519981  |
| 1 | 5.112414  | 1.973477  | 2.627941  |
| 1 | 4.106063  | 3.658953  | 4.100629  |
| 6 | -0.071954 | -0.464056 | 2.545101  |
| 8 | -1.093185 | 0.069011  | 2.929688  |
| 8 | 0.382877  | -1.652486 | 2.943579  |
| 8 | 3.725772  | 0.024128  | 1.371000  |
| 6 | 5.139978  | -0.141181 | 1.287880  |
| 1 | 5.294188  | -1.043361 | 0.696994  |
| 1 | 5.611655  | 0.711277  | 0.785059  |
| 1 | 5.576103  | -0.273983 | 2.284011  |
| 7 | 3.444919  | -3.815067 | 2.327087  |
| 7 | 3.930062  | -2.975757 | 2.857533  |
| 6 | -4.657923 | 2.204872  | 0.743944  |
| 1 | -4.890883 | 1.406830  | 1.459026  |
| 1 | -4.919632 | 3.145484  | 1.237510  |
| 6 | -5.571822 | 2.047166  | -0.498917 |
| 1 | -5.402201 | 1.088647  | -0.992498 |
| 1 | -5.351290 | 2.847611  | -1.214021 |
| 6 | -7.025449 | 2.193518  | -0.099134 |
| 8 | -7.516207 | 3.174604  | 0.403767  |
| 8 | -7.762321 | 1.065035  | -0.345925 |
| 1 | -8.676353 | 1.260886  | -0.059091 |
| 6 | -4.083921 | -3.169406 | 0.554741  |
| 1 | -4.517122 | -2.461848 | 1.267248  |
| 1 | -4.177616 | -4.157784 | 1.015142  |
| 6 | -4.914493 | -3.146896 | -0.765504 |
| 1 | -4.338195 | -2.635429 | -1.547676 |
| 1 | -5.117989 | -4.156197 | -1.129386 |
| 6 | -6.242365 | -2.414197 | -0.693651 |
| 8 | -7.278980 | -2.791846 | -1.186087 |
| 8 | -6.117082 | -1.220990 | -0.057056 |
| 1 | -6.954982 | -0.717045 | -0.149885 |
| 6 | -1.563804 | -5.197560 | 0.226549  |
| 1 | -2.536083 | -5.592241 | 0.533688  |
| 1 | -1.334506 | -5.626415 | -0.757665 |
| 1 | -0.814575 | -5.584466 | 0.927963  |
| 6 | -2.658362 | 4.721514  | 0.397436  |
| 1 | -2.516338 | 5.238995  | -0.560002 |
| 1 | -3.693934 | 4.885829  | 0.706291  |
| 1 | -2.012757 | 5.218859  | 1.131366  |
| 6 | 3.550034  | -4.586601 | -1.376574 |
| 1 | 3.130415  | -5.114102 | -0.514034 |
| 1 | 3.187478  | -5.094252 | -2.280864 |

|    |           |           |           |
|----|-----------|-----------|-----------|
| 1  | 4.636603  | -4.713696 | -1.350139 |
| 6  | 4.762857  | 3.294081  | -2.191674 |
| 1  | 5.597253  | 2.916462  | -1.586310 |
| 1  | 4.865014  | 2.855451  | -3.191940 |
| 1  | 4.898977  | 4.374106  | -2.287671 |
| 6  | 5.259925  | -2.045012 | -2.427883 |
| 6  | 5.794871  | -3.010539 | -3.190895 |
| 1  | 5.858815  | -1.151445 | -2.255354 |
| 1  | 6.796173  | -2.905818 | -3.597373 |
| 1  | 5.257385  | -3.915341 | -3.455538 |
| 6  | 2.600779  | 5.287075  | -0.995313 |
| 6  | 2.147905  | 6.073661  | -0.007895 |
| 1  | 3.129841  | 5.758009  | -1.823175 |
| 1  | 2.280192  | 7.150625  | -0.047412 |
| 1  | 1.665354  | 5.673608  | 0.879367  |
| 6  | -0.446458 | -2.368074 | 3.910386  |
| 1  | -0.661628 | -1.693511 | 4.743171  |
| 1  | -1.390728 | -2.620022 | 3.419538  |
| 6  | 0.320606  | -3.598822 | 4.348986  |
| 1  | 1.263819  | -3.323368 | 4.830453  |
| 1  | -0.279712 | -4.164310 | 5.069604  |
| 1  | 0.541779  | -4.249884 | 3.497517  |
| 7  | -0.130475 | 0.067227  | -2.469242 |
| 6  | -0.331544 | -1.005466 | -3.218591 |
| 6  | -0.384199 | 1.166761  | -3.265319 |
| 7  | -0.703494 | -0.636159 | -4.466143 |
| 1  | -0.215365 | -2.028967 | -2.897617 |
| 6  | -0.743494 | 0.743415  | -4.515351 |
| 1  | -0.292869 | 2.170901  | -2.883084 |
| 1  | -0.911214 | -1.265579 | -5.228941 |
| 1  | -1.015501 | 1.281282  | -5.409881 |
| 77 | 0.503889  | 0.065548  | -0.306153 |

-----  
**TS(C-P)<sub>Ir(his)</sub>**  
 -----

Number of imaginary frequencies: 1    Electronic energy:    HF=-2817.6306953  
 Zero-point correction=                    0.883861 (Hartree/Particle)  
 Thermal correction to Energy=            0.942957  
 Thermal correction to Enthalpy=         0.943901  
 Thermal correction to Gibbs Free Energy= 0.786549  
 Sum of electronic and zero-point Energies= -2816.746834  
 Sum of electronic and thermal Energies= -2816.687738  
 Sum of electronic and thermal Enthalpies= -2816.686794  
 Sum of electronic and thermal Free Energies= -2816.844146

.....  
 Cartesian Coordinates  
 .....

|   |          |           |           |
|---|----------|-----------|-----------|
| 6 | 3.483256 | -3.368071 | -0.771878 |
| 6 | 2.188394 | -2.786165 | -0.485312 |
| 7 | 2.253372 | -1.418253 | -0.635470 |



|   |           |           |           |
|---|-----------|-----------|-----------|
| 6 | 3.530262  | -1.106144 | -1.034986 |
| 6 | 4.320874  | -2.327218 | -1.123154 |
| 6 | 1.035646  | -3.497424 | -0.148237 |
| 6 | -0.237840 | -2.981928 | 0.089498  |
| 7 | -0.577172 | -1.651889 | 0.034232  |
| 6 | -1.922264 | -1.558382 | 0.287536  |
| 6 | -2.461770 | -2.889463 | 0.529519  |
| 6 | -1.418496 | -3.770825 | 0.405748  |
| 6 | -2.659042 | -0.376335 | 0.292427  |
| 6 | -2.192512 | 0.909832  | 0.023472  |
| 7 | -0.894277 | 1.232829  | -0.277626 |
| 6 | -0.847623 | 2.582343  | -0.521358 |
| 6 | -2.174494 | 3.150550  | -0.354589 |
| 6 | -3.006442 | 2.117001  | -0.001349 |
| 6 | 0.300799  | 3.305482  | -0.842057 |
| 6 | 1.594765  | 2.810281  | -0.989722 |
| 7 | 1.937795  | 1.483891  | -0.903637 |
| 6 | 3.259854  | 1.372672  | -1.265375 |
| 6 | 3.792182  | 2.685206  | -1.568957 |
| 6 | 2.770299  | 3.587423  | -1.370833 |
| 6 | 3.983996  | 0.180068  | -1.325246 |
| 1 | 0.173406  | 4.367722  | -1.011868 |
| 1 | 5.013754  | 0.265998  | -1.653543 |
| 1 | 1.137096  | -4.575045 | -0.078819 |
| 1 | -3.718008 | -0.471561 | 0.501273  |
| 6 | -4.474004 | 2.184941  | 0.317529  |
| 1 | -4.710352 | 1.492476  | 1.134083  |
| 1 | -4.729064 | 3.185809  | 0.679244  |
| 6 | -5.392682 | 1.866497  | -0.890911 |
| 1 | -5.236533 | 0.845175  | -1.242406 |
| 1 | -5.163534 | 2.555573  | -1.711152 |
| 6 | -6.842688 | 2.088881  | -0.513091 |
| 8 | -7.322972 | 3.145509  | -0.182476 |
| 8 | -7.586596 | 0.939842  | -0.555060 |
| 1 | -8.496841 | 1.185903  | -0.296346 |
| 6 | -3.911127 | -3.181357 | 0.801952  |
| 1 | -4.325204 | -2.398257 | 1.442736  |
| 1 | -4.000088 | -4.112794 | 1.369553  |
| 6 | -4.767127 | -3.298039 | -0.497039 |
| 1 | -4.203286 | -2.881323 | -1.341985 |
| 1 | -4.984161 | -4.339674 | -0.742814 |
| 6 | -6.088417 | -2.551182 | -0.480584 |
| 8 | -7.139287 | -2.974749 | -0.899948 |
| 8 | -5.940831 | -1.292257 | 0.008193  |
| 1 | -6.779023 | -0.797927 | -0.124675 |
| 6 | -1.435012 | -5.264308 | 0.544014  |
| 1 | -2.416618 | -5.622580 | 0.865557  |
| 1 | -1.200401 | -5.764670 | -0.404552 |
| 1 | -0.701080 | -5.612875 | 1.281133  |
| 6 | -2.508318 | 4.601840  | -0.532312 |

|   |           |           |           |
|---|-----------|-----------|-----------|
| 1 | -2.365521 | 4.925461  | -1.571267 |
| 1 | -3.548440 | 4.808864  | -0.266968 |
| 1 | -1.874350 | 5.242443  | 0.092929  |
| 6 | 3.815644  | -4.824555 | -0.654142 |
| 1 | 3.231005  | -5.310156 | 0.134077  |
| 1 | 3.621780  | -5.371436 | -1.586878 |
| 1 | 4.875503  | -4.959251 | -0.416773 |
| 6 | 5.207949  | 2.962925  | -1.976292 |
| 1 | 5.918939  | 2.680607  | -1.189127 |
| 1 | 5.486312  | 2.404821  | -2.878902 |
| 1 | 5.361018  | 4.025158  | -2.181910 |
| 6 | 5.736447  | -2.356600 | -1.483696 |
| 6 | 6.385050  | -3.359433 | -2.094859 |
| 1 | 6.309983  | -1.466337 | -1.227486 |
| 1 | 7.447979  | -3.287458 | -2.304054 |
| 1 | 5.886709  | -4.264963 | -2.425790 |
| 6 | 2.853227  | 5.041395  | -1.520502 |
| 6 | 2.251590  | 5.955548  | -0.745380 |
| 1 | 3.499186  | 5.395885  | -2.323110 |
| 1 | 2.383339  | 7.017166  | -0.931279 |
| 1 | 1.643528  | 5.682185  | 0.112337  |
| 6 | 1.219089  | 0.189050  | 1.855363  |
| 6 | 1.198012  | 1.555153  | 2.462186  |
| 6 | 0.542232  | -0.852559 | 2.700434  |
| 6 | 0.085301  | 2.400654  | 2.548084  |
| 6 | 2.327919  | 1.934420  | 3.209703  |
| 8 | -0.531595 | -0.669210 | 3.233163  |
| 8 | 1.268852  | -1.984657 | 2.802568  |
| 6 | 0.163492  | 3.607413  | 3.246885  |
| 1 | -0.842749 | 2.106463  | 2.080051  |
| 6 | 2.441147  | 3.127439  | 3.906441  |
| 8 | 3.288926  | 0.935233  | 3.357381  |
| 6 | 1.338501  | 3.982749  | 3.903278  |
| 1 | -0.706969 | 4.255296  | 3.285773  |
| 1 | 3.349322  | 3.357384  | 4.452768  |
| 6 | 3.347850  | 0.140109  | 2.288683  |
| 1 | 1.389503  | 4.925377  | 4.439550  |
| 1 | 3.643123  | -0.881293 | 2.510713  |
| 1 | 3.724683  | 0.596246  | 1.370739  |
| 1 | 2.084100  | -0.178140 | 1.257197  |
| 7 | 0.213666  | -0.327201 | -2.422895 |
| 6 | 0.132521  | -1.490698 | -3.057728 |
| 6 | -0.042246 | 0.667359  | -3.349857 |
| 7 | -0.166576 | -1.275077 | -4.357008 |
| 1 | 0.282652  | -2.461745 | -2.614103 |
| 6 | -0.281303 | 0.085065  | -4.562723 |
| 1 | -0.033606 | 1.709356  | -3.076502 |
| 1 | -0.281959 | -1.995313 | -5.056481 |
| 1 | -0.515569 | 0.506311  | -5.527513 |
| 6 | 0.692240  | -3.055098 | 3.603378  |

|    |           |           |           |
|----|-----------|-----------|-----------|
| 1  | -0.385397 | -3.074405 | 3.428966  |
| 1  | 1.144714  | -3.961045 | 3.193996  |
| 6  | 1.018468  | -2.878760 | 5.077662  |
| 1  | 0.551650  | -1.972225 | 5.472465  |
| 1  | 0.635335  | -3.735027 | 5.644019  |
| 1  | 2.100249  | -2.821391 | 5.237039  |
| 77 | 0.682372  | -0.080975 | -0.409914 |

-----  
**Alr**  
 -----

Number of imaginary frequencies: 0    Electronic energy:    HF=-1939.3627749  
 Zero-point correction=                    0.598678 (Hartree/Particle)  
 Thermal correction to Energy=            0.638988  
 Thermal correction to Enthalpy=         0.639932  
 Thermal correction to Gibbs Free Energy= 0.523994  
 Sum of electronic and zero-point Energies= -1938.764097  
 Sum of electronic and thermal Energies= -1938.723787  
 Sum of electronic and thermal Enthalpies= -1938.722843  
 Sum of electronic and thermal Free Energies= -1938.838781

-----  
 Cartesian Coordinates  
 -----

|    |           |           |           |
|----|-----------|-----------|-----------|
| 6  | -3.900310 | -3.106387 | -0.041168 |
| 6  | -2.581921 | -2.617385 | -0.092293 |
| 7  | -2.583004 | -1.197325 | -0.050542 |
| 6  | -3.936249 | -0.822683 | 0.033478  |
| 6  | -4.760865 | -1.982063 | 0.043306  |
| 6  | -1.441436 | -3.417373 | -0.163270 |
| 6  | -0.139559 | -2.975378 | -0.230107 |
| 7  | 0.230056  | -1.649516 | -0.254576 |
| 6  | 1.593275  | -1.643246 | -0.360069 |
| 6  | 2.116454  | -3.007764 | -0.379564 |
| 6  | 1.036530  | -3.836936 | -0.301890 |
| 6  | 2.363087  | -0.495137 | -0.471099 |
| 6  | 1.885204  | 0.803719  | -0.459435 |
| 7  | 0.527086  | 1.178356  | -0.280954 |
| 6  | 0.524209  | 2.589051  | -0.295721 |
| 6  | 1.845754  | 3.074042  | -0.506732 |
| 6  | 2.688781  | 1.966464  | -0.613096 |
| 6  | -0.585775 | 3.395620  | -0.112005 |
| 6  | -1.884752 | 2.955273  | 0.082738  |
| 7  | -2.256917 | 1.639036  | 0.039934  |
| 6  | -3.629905 | 1.627294  | 0.142543  |
| 6  | -4.144784 | 2.977772  | 0.267569  |
| 6  | -3.056781 | 3.812323  | 0.261032  |
| 77 | -1.021439 | -0.009146 | -0.129683 |
| 6  | -4.402499 | 0.483913  | 0.129989  |
| 1  | -0.427496 | 4.466187  | -0.140863 |
| 1  | -5.473295 | 0.619305  | 0.217838  |
| 1  | -1.596782 | -4.489133 | -0.160688 |

|   |           |           |           |
|---|-----------|-----------|-----------|
| 1 | 3.434599  | -0.623164 | -0.563849 |
| 6 | 4.169262  | 1.979076  | -0.856829 |
| 1 | 4.442642  | 1.139541  | -1.505561 |
| 1 | 4.452607  | 2.889520  | -1.392775 |
| 6 | 5.011221  | 1.904160  | 0.443341  |
| 1 | 4.819039  | 0.976571  | 0.984463  |
| 1 | 4.754781  | 2.744489  | 1.098467  |
| 6 | 6.483932  | 2.034219  | 0.103129  |
| 8 | 6.977686  | 2.961963  | -0.489526 |
| 8 | 7.218171  | 0.962469  | 0.524688  |
| 1 | 8.147663  | 1.141591  | 0.278270  |
| 6 | 3.578262  | -3.348633 | -0.436830 |
| 1 | 4.076019  | -2.693419 | -1.158037 |
| 1 | 3.703986  | -4.365834 | -0.818885 |
| 6 | 4.288544  | -3.233930 | 0.948267  |
| 1 | 3.657893  | -2.658966 | 1.638569  |
| 1 | 4.441025  | -4.216342 | 1.399156  |
| 6 | 5.631976  | -2.529168 | 0.925861  |
| 8 | 6.639965  | -2.911204 | 1.468040  |
| 8 | 5.558888  | -1.345970 | 0.254091  |
| 1 | 6.407674  | -0.866546 | 0.368659  |
| 6 | 0.992462  | -5.333840 | -0.285647 |
| 1 | 1.991283  | -5.761631 | -0.402818 |
| 1 | 0.580810  | -5.714775 | 0.657592  |
| 1 | 0.368741  | -5.727947 | -1.097541 |
| 6 | 2.222213  | 4.519002  | -0.591991 |
| 1 | 2.016959  | 5.036753  | 0.353705  |
| 1 | 3.282759  | 4.649880  | -0.817351 |
| 1 | 1.647373  | 5.033163  | -1.371518 |
| 6 | -4.305108 | -4.543799 | -0.111499 |
| 1 | -3.526337 | -5.167324 | -0.556002 |
| 1 | -4.521510 | -4.948427 | 0.886410  |
| 1 | -5.211400 | -4.660383 | -0.713789 |
| 6 | -5.592303 | 3.330495  | 0.419309  |
| 1 | -6.190552 | 2.952992  | -0.419277 |
| 1 | -6.014275 | 2.907481  | 1.339897  |
| 1 | -5.733202 | 4.412812  | 0.467126  |
| 6 | -6.210899 | -1.951837 | 0.091999  |
| 6 | -7.023329 | -2.935660 | 0.520591  |
| 1 | -6.676632 | -1.025836 | -0.236465 |
| 1 | -8.099787 | -2.796377 | 0.518237  |
| 1 | -6.661408 | -3.879623 | 0.911304  |
| 6 | -3.069132 | 5.269819  | 0.391982  |
| 6 | -2.178495 | 6.016375  | 1.061065  |
| 1 | -3.912908 | 5.774581  | -0.076613 |
| 1 | -2.283320 | 7.095723  | 1.111379  |
| 1 | -1.346789 | 5.583092  | 1.609472  |

---

**B<sub>Ir</sub>**

---

Number of imaginary frequencies: 0    Electronic energy:    HF=-2700.8957001  
 Zero-point correction=                    0.820514 (Hartree/Particle)  
 Thermal correction to Energy=            0.878198  
 Thermal correction to Enthalpy=         0.879142  
 Thermal correction to Gibbs Free Energy= 0.718999  
 Sum of electronic and zero-point Energies= -2700.075186  
 Sum of electronic and thermal Energies= -2700.017502  
 Sum of electronic and thermal Enthalpies= -2700.016558  
 Sum of electronic and thermal Free Energies= -2700.176701

.....  
 Cartesian Coordinates

.....

|    |           |           |           |
|----|-----------|-----------|-----------|
| 6  | -1.780934 | 3.270128  | -0.658294 |
| 6  | -1.338200 | 1.889365  | -0.720557 |
| 7  | -0.027740 | 1.782801  | -0.306727 |
| 6  | 0.372421  | 3.050786  | 0.016904  |
| 6  | -0.726392 | 3.995567  | -0.165387 |
| 6  | -2.118184 | 0.824718  | -1.125427 |
| 6  | -1.714474 | -0.505821 | -1.180841 |
| 7  | -0.436246 | -0.986781 | -0.844316 |
| 6  | -0.484131 | -2.388738 | -1.068306 |
| 6  | -1.756198 | -2.763450 | -1.532712 |
| 6  | -2.538316 | -1.580702 | -1.613865 |
| 6  | 0.574141  | -3.273078 | -0.854782 |
| 6  | 1.831484  | -2.946834 | -0.402151 |
| 7  | 2.242501  | -1.669217 | -0.093648 |
| 6  | 3.540993  | -1.782611 | 0.317728  |
| 6  | 3.978218  | -3.177359 | 0.277192  |
| 6  | 2.912146  | -3.898536 | -0.178231 |
| 77 | 1.102752  | 0.053652  | -0.212493 |
| 7  | 2.651445  | 1.102286  | 0.370490  |
| 6  | 3.954003  | 0.623948  | 0.668132  |
| 6  | 4.814860  | 1.721220  | 0.951013  |
| 6  | 4.053977  | 2.884309  | 0.858177  |
| 6  | 2.724714  | 2.502347  | 0.518428  |
| 6  | 4.333969  | -0.705772 | 0.685202  |
| 6  | 1.670234  | 3.385285  | 0.370888  |
| 8  | -7.789392 | 1.814687  | -0.781004 |
| 6  | -6.714346 | 1.115860  | -0.361170 |
| 8  | -5.583988 | 1.252759  | -0.821582 |
| 6  | -7.060175 | 0.169320  | 0.695262  |
| 7  | -8.334673 | 0.145127  | 1.050214  |
| 7  | -9.425710 | 0.114573  | 1.355949  |
| 6  | -6.099399 | -0.711693 | 1.393803  |
| 6  | -4.815371 | -0.249833 | 1.713032  |
| 6  | -3.892600 | -1.069207 | 2.363940  |
| 6  | -4.256110 | -2.366024 | 2.723077  |
| 6  | -5.531412 | -2.850393 | 2.424182  |
| 6  | -6.451306 | -2.036043 | 1.755626  |
| 8  | -7.709160 | -2.430604 | 1.410196  |

|   |           |           |           |
|---|-----------|-----------|-----------|
| 6 | -8.146256 | -3.735987 | 1.769114  |
| 1 | 1.882447  | 4.435985  | 0.522520  |
| 1 | 5.348636  | -0.919666 | 0.992919  |
| 1 | 0.386654  | -4.316948 | -1.073892 |
| 1 | -3.137786 | 1.042278  | -1.418201 |
| 1 | -4.544327 | 0.763816  | 1.442636  |
| 1 | -2.906240 | -0.685281 | 2.607104  |
| 1 | -5.802347 | -3.859538 | 2.711635  |
| 1 | -3.553374 | -3.008449 | 3.246408  |
| 1 | -9.170766 | -3.816034 | 1.403219  |
| 1 | -7.527710 | -4.508476 | 1.295185  |
| 1 | -8.135309 | -3.875717 | 2.856924  |
| 6 | -7.596953 | 2.794356  | -1.831640 |
| 1 | -8.521044 | 2.752917  | -2.412885 |
| 1 | -6.760054 | 2.478369  | -2.457621 |
| 6 | -7.371728 | 4.178615  | -1.243760 |
| 1 | -6.441825 | 4.212982  | -0.667322 |
| 1 | -7.303415 | 4.916816  | -2.050832 |
| 1 | -8.200371 | 4.463229  | -0.587939 |
| 6 | -3.135898 | 3.763441  | -1.063102 |
| 1 | -3.335911 | 4.749332  | -0.634647 |
| 1 | -3.212060 | 3.853751  | -2.155423 |
| 1 | -3.933961 | 3.085553  | -0.743818 |
| 6 | -2.206232 | -4.157630 | -1.830363 |
| 1 | -3.251272 | -4.294602 | -1.537161 |
| 1 | -2.135436 | -4.381291 | -2.903435 |
| 1 | -1.607074 | -4.902445 | -1.301207 |
| 6 | -0.706826 | 5.434888  | 0.101121  |
| 6 | -0.103756 | 6.046658  | 1.130959  |
| 1 | -1.273939 | 6.047213  | -0.598750 |
| 1 | -0.158748 | 7.124606  | 1.248277  |
| 1 | 0.426983  | 5.500124  | 1.905555  |
| 6 | -3.926434 | -1.438715 | -2.010148 |
| 6 | -4.591503 | -2.254588 | -2.849908 |
| 1 | -4.457698 | -0.582466 | -1.600696 |
| 1 | -5.630564 | -2.055963 | -3.094012 |
| 1 | -4.135061 | -3.104228 | -3.345855 |
| 6 | 4.512312  | 4.293725  | 1.062141  |
| 1 | 5.551483  | 4.337129  | 1.396140  |
| 1 | 4.435613  | 4.873221  | 0.133428  |
| 1 | 3.899108  | 4.806754  | 1.812692  |
| 6 | 6.288080  | 1.629091  | 1.218514  |
| 1 | 6.587599  | 2.422039  | 1.912932  |
| 1 | 6.535137  | 0.682804  | 1.707559  |
| 6 | 5.337343  | -3.696282 | 0.660387  |
| 1 | 5.244078  | -4.765091 | 0.874764  |
| 1 | 5.683075  | -3.234058 | 1.591583  |
| 6 | 6.442035  | -3.526069 | -0.423637 |
| 1 | 6.045795  | -3.724028 | -1.421854 |
| 1 | 7.235105  | -4.253013 | -0.213689 |

|   |           |           |           |
|---|-----------|-----------|-----------|
| 6 | 7.118942  | 1.750543  | -0.088338 |
| 1 | 6.808821  | 0.972245  | -0.796005 |
| 1 | 6.976791  | 2.727862  | -0.554917 |
| 6 | 7.084320  | -2.152100 | -0.429762 |
| 8 | 7.042219  | -1.364790 | -1.356373 |
| 8 | 7.697729  | -1.897561 | 0.740429  |
| 1 | 8.171261  | -1.025632 | 0.688432  |
| 6 | 8.586196  | 1.515422  | 0.181675  |
| 8 | 9.043027  | 0.506120  | 0.698030  |
| 8 | 9.366508  | 2.534916  | -0.194732 |
| 1 | 10.291865 | 2.282062  | -0.003773 |
| 6 | 2.798162  | -5.371510 | -0.426366 |
| 1 | 2.627740  | -5.587336 | -1.488852 |
| 1 | 3.707145  | -5.900012 | -0.129236 |
| 1 | 1.964001  | -5.811476 | 0.134121  |

---

**TS(B-B')<sub>IR</sub>**

---

|                                              |                             |                  |
|----------------------------------------------|-----------------------------|------------------|
| Number of imaginary frequencies: 1           | Electronic energy:          | HF=-2700.8748029 |
| Zero-point correction=                       | 0.819545 (Hartree/Particle) |                  |
| Thermal correction to Energy=                | 0.876418                    |                  |
| Thermal correction to Enthalpy=              | 0.877362                    |                  |
| Thermal correction to Gibbs Free Energy=     | 0.725001                    |                  |
| Sum of electronic and zero-point Energies=   | -2700.055258                |                  |
| Sum of electronic and thermal Energies=      | -2699.998385                |                  |
| Sum of electronic and thermal Enthalpies=    | -2699.997441                |                  |
| Sum of electronic and thermal Free Energies= | -2700.149802                |                  |

.....  
 Cartesian Coordinates

|   |           |           |           |
|---|-----------|-----------|-----------|
| 6 | -3.051045 | 3.348648  | -1.607038 |
| 6 | -1.840668 | 2.789704  | -1.089808 |
| 7 | -1.917159 | 1.406639  | -1.075092 |
| 6 | -3.163958 | 1.082258  | -1.590519 |
| 6 | -3.886141 | 2.274178  | -1.932859 |
| 6 | -0.735485 | 3.534129  | -0.670721 |
| 6 | 0.480223  | 3.041501  | -0.236734 |
| 7 | 0.808385  | 1.703729  | -0.157642 |
| 6 | 2.115409  | 1.651226  | 0.235590  |
| 6 | 2.634133  | 2.993443  | 0.463181  |
| 6 | 1.617383  | 3.857356  | 0.156054  |
| 6 | 2.859450  | 0.475683  | 0.291878  |
| 6 | 2.416385  | -0.787016 | -0.058526 |
| 7 | 1.091973  | -1.111966 | -0.382192 |
| 6 | 1.079793  | -2.509709 | -0.583753 |
| 6 | 2.407370  | -3.030257 | -0.442578 |
| 6 | 3.231846  | -1.971696 | -0.117812 |
| 6 | -0.041054 | -3.272275 | -0.835796 |
| 6 | -1.337656 | -2.796393 | -1.038258 |
| 7 | -1.657705 | -1.474107 | -1.066977 |

|    |           |           |           |
|----|-----------|-----------|-----------|
| 6  | -2.956430 | -1.394385 | -1.539414 |
| 6  | -3.482340 | -2.725260 | -1.776442 |
| 6  | -2.490088 | -3.609161 | -1.428048 |
| 77 | -0.439679 | 0.111554  | -0.544704 |
| 6  | -3.636928 | -0.220295 | -1.786926 |
| 1  | 0.107817  | -4.339705 | -0.939934 |
| 1  | -4.631329 | -0.316185 | -2.206582 |
| 1  | -0.828469 | 4.612625  | -0.725837 |
| 1  | 3.896478  | 0.563683  | 0.590243  |
| 6  | -1.692965 | 0.088184  | 2.105401  |
| 6  | -1.376176 | -1.290092 | 2.518133  |
| 6  | -0.106841 | -1.589249 | 3.054900  |
| 6  | -2.319290 | -2.353845 | 2.413405  |
| 6  | 0.211276  | -2.870171 | 3.488582  |
| 1  | 0.621944  | -0.796306 | 3.134644  |
| 6  | -1.991312 | -3.639012 | 2.859131  |
| 6  | -0.732697 | -3.895512 | 3.397643  |
| 1  | 1.194619  | -3.063978 | 3.905123  |
| 1  | -2.719386 | -4.437805 | 2.790506  |
| 1  | -0.495319 | -4.896129 | 3.747074  |
| 6  | -0.961687 | 1.295276  | 2.639244  |
| 8  | 0.159604  | 1.265383  | 3.097399  |
| 8  | -1.723493 | 2.396474  | 2.563402  |
| 8  | -3.526293 | -2.039292 | 1.881285  |
| 6  | -4.559121 | -3.025198 | 1.847527  |
| 1  | -5.431435 | -2.519868 | 1.431303  |
| 1  | -4.277709 | -3.865269 | 1.203893  |
| 1  | -4.790563 | -3.384239 | 2.856535  |
| 7  | -3.904981 | 0.793356  | 1.271403  |
| 7  | -2.929707 | 0.405380  | 1.687129  |
| 6  | 4.720707  | -2.014617 | 0.064360  |
| 1  | 5.047967  | -1.251153 | 0.776762  |
| 1  | 5.009050  | -2.980699 | 0.493414  |
| 6  | 5.467540  | -1.816234 | -1.285704 |
| 1  | 5.253122  | -0.818995 | -1.687798 |
| 1  | 5.144845  | -2.565507 | -2.011605 |
| 6  | 6.963044  | -1.963117 | -1.131280 |
| 8  | 7.657113  | -2.833597 | -1.590599 |
| 8  | 7.492394  | -0.959515 | -0.353778 |
| 1  | 8.455091  | -1.118131 | -0.301193 |
| 6  | 4.021488  | 3.352130  | 0.920944  |
| 1  | 4.381949  | 2.639889  | 1.670997  |
| 1  | 3.974278  | 4.320802  | 1.428687  |
| 6  | 5.081463  | 3.470880  | -0.213452 |
| 1  | 4.662228  | 3.977612  | -1.085221 |
| 1  | 5.923023  | 4.061192  | 0.165921  |
| 6  | 5.627157  | 2.131134  | -0.660430 |
| 8  | 5.436052  | 1.613862  | -1.742759 |
| 8  | 6.348391  | 1.549304  | 0.322808  |
| 1  | 6.728288  | 0.705684  | -0.014729 |



|   |           |           |           |
|---|-----------|-----------|-----------|
| 6 | 1.623825  | 5.356971  | 0.164507  |
| 1 | 2.528176  | 5.750667  | 0.635858  |
| 1 | 1.584620  | 5.764441  | -0.854072 |
| 1 | 0.765273  | 5.767611  | 0.709682  |
| 6 | 2.778369  | -4.469146 | -0.629728 |
| 1 | 2.589621  | -4.799771 | -1.658727 |
| 1 | 3.835328  | -4.645029 | -0.415870 |
| 1 | 2.193732  | -5.121413 | 0.030967  |
| 6 | -3.361767 | 4.807320  | -1.722244 |
| 1 | -2.794842 | 5.405899  | -1.003454 |
| 1 | -3.125004 | 5.192087  | -2.723451 |
| 1 | -4.426943 | 4.990390  | -1.549303 |
| 6 | -4.859039 | -3.021176 | -2.288817 |
| 1 | -5.033393 | -4.097113 | -2.365898 |
| 1 | -5.635244 | -2.610601 | -1.630428 |
| 1 | -5.018405 | -2.587135 | -3.283872 |
| 6 | -5.245759 | 2.295643  | -2.456776 |
| 6 | -5.794879 | 3.253180  | -3.221791 |
| 1 | -5.866029 | 1.438171  | -2.201621 |
| 1 | -6.824753 | 3.170724  | -3.554843 |
| 1 | -5.244667 | 4.122437  | -3.565559 |
| 6 | -2.567561 | -5.069397 | -1.463787 |
| 6 | -1.978356 | -5.919384 | -0.608372 |
| 1 | -3.195366 | -5.487822 | -2.249411 |
| 1 | -2.103668 | -6.992577 | -0.714991 |
| 1 | -1.380181 | -5.578956 | 0.232297  |
| 6 | -1.144158 | 3.611715  | 3.118783  |
| 1 | -0.871753 | 3.413596  | 4.159185  |
| 1 | -0.229158 | 3.836512  | 2.564411  |
| 6 | -2.185299 | 4.705902  | 2.994852  |
| 1 | -3.094885 | 4.449250  | 3.546433  |
| 1 | -1.786541 | 5.638319  | 3.408167  |
| 1 | -2.451904 | 4.877766  | 1.947077  |

-----  
**B'<sub>fr</sub>**  
 -----

Number of imaginary frequencies: 0    Electronic energy:    HF=-2700.9012763  
 Zero-point correction=                    0.820439 (Hartree/Particle)  
 Thermal correction to Energy=            0.877705  
 Thermal correction to Enthalpy=         0.878649  
 Thermal correction to Gibbs Free Energy= 0.726375  
 Sum of electronic and zero-point Energies= -2700.080837  
 Sum of electronic and thermal Energies= -2700.023571  
 Sum of electronic and thermal Enthalpies= -2700.022627  
 Sum of electronic and thermal Free Energies= -2700.174901

.....  
 Cartesian Coordinates  
 .....

|   |          |           |           |
|---|----------|-----------|-----------|
| 6 | 3.324330 | -3.517030 | -1.095547 |
| 6 | 2.051983 | -2.916578 | -0.759758 |

|    |           |           |           |
|----|-----------|-----------|-----------|
| 7  | 2.131523  | -1.542961 | -0.873937 |
| 6  | 3.413184  | -1.253796 | -1.278388 |
| 6  | 4.176532  | -2.483770 | -1.426192 |
| 6  | 0.900548  | -3.615359 | -0.412009 |
| 6  | -0.361015 | -3.084860 | -0.170603 |
| 7  | -0.673649 | -1.741413 | -0.192430 |
| 6  | -2.026914 | -1.647199 | 0.049059  |
| 6  | -2.588555 | -2.974950 | 0.228508  |
| 6  | -1.555478 | -3.865577 | 0.093473  |
| 6  | -2.749592 | -0.460304 | 0.078466  |
| 6  | -2.264169 | 0.818427  | -0.177951 |
| 7  | -0.952274 | 1.117141  | -0.465163 |
| 6  | -0.895207 | 2.475058  | -0.700387 |
| 6  | -2.216880 | 3.054630  | -0.559073 |
| 6  | -3.064992 | 2.030483  | -0.224274 |
| 6  | 0.251854  | 3.185257  | -1.026569 |
| 6  | 1.535060  | 2.675961  | -1.212490 |
| 7  | 1.861472  | 1.346843  | -1.112246 |
| 6  | 3.179690  | 1.223027  | -1.500065 |
| 6  | 3.709757  | 2.519067  | -1.856357 |
| 6  | 2.699963  | 3.434164  | -1.650127 |
| 77 | 0.635201  | -0.176992 | -0.455410 |
| 6  | 3.888917  | 0.027541  | -1.554452 |
| 1  | 0.127285  | 4.246195  | -1.204205 |
| 1  | 4.915526  | 0.096522  | -1.896303 |
| 1  | 0.982605  | -4.696034 | -0.374629 |
| 1  | -3.813747 | -0.547557 | 0.264197  |
| 6  | 1.130215  | 0.137659  | 1.564756  |
| 6  | 0.817967  | 1.508473  | 2.170118  |
| 6  | -0.467377 | 1.735139  | 2.691079  |
| 6  | 1.745948  | 2.582018  | 2.207518  |
| 6  | -0.824055 | 2.959326  | 3.248473  |
| 1  | -1.194987 | 0.938464  | 2.657462  |
| 6  | 1.384322  | 3.807101  | 2.782647  |
| 6  | 0.106563  | 3.994775  | 3.302139  |
| 1  | -1.825640 | 3.094362  | 3.643590  |
| 1  | 2.103582  | 4.615711  | 2.824596  |
| 1  | -0.154728 | 4.950974  | 3.745904  |
| 6  | 0.557547  | -1.053985 | 2.408976  |
| 8  | -0.586356 | -1.100931 | 2.785709  |
| 8  | 1.482611  | -1.984862 | 2.640628  |
| 8  | 2.978674  | 2.360499  | 1.677202  |
| 6  | 3.989413  | 3.363954  | 1.790365  |
| 1  | 4.887903  | 2.922087  | 1.358220  |
| 1  | 3.718647  | 4.260790  | 1.223731  |
| 1  | 4.173661  | 3.619875  | 2.839751  |
| 7  | 3.661473  | -0.372678 | 1.496290  |
| 7  | 2.591587  | -0.086556 | 1.592035  |
| 6  | -4.540622 | 2.110238  | 0.048597  |
| 1  | -4.810835 | 1.411278  | 0.849289  |

|   |           |           |           |
|---|-----------|-----------|-----------|
| 1 | -4.796536 | 3.109315  | 0.414416  |
| 6 | -5.423812 | 1.815718  | -1.190766 |
| 1 | -5.263093 | 0.800378  | -1.556592 |
| 1 | -5.167740 | 2.515737  | -1.993954 |
| 6 | -6.883116 | 2.039470  | -0.849987 |
| 8 | -7.356208 | 3.079382  | -0.460529 |
| 8 | -7.643759 | 0.912324  | -1.004958 |
| 1 | -8.561212 | 1.158172  | -0.772517 |
| 6 | -4.048598 | -3.260356 | 0.441368  |
| 1 | -4.482456 | -2.487056 | 1.081020  |
| 1 | -4.162896 | -4.201399 | 0.988278  |
| 6 | -4.855653 | -3.348639 | -0.891154 |
| 1 | -4.260030 | -2.920754 | -1.707970 |
| 1 | -5.068791 | -4.384557 | -1.162305 |
| 6 | -6.172480 | -2.594993 | -0.903119 |
| 8 | -7.216324 | -3.008805 | -1.347460 |
| 8 | -6.029525 | -1.338746 | -0.401962 |
| 1 | -6.861251 | -0.840361 | -0.558010 |
| 6 | -1.601741 | -5.363525 | 0.147069  |
| 1 | -2.580494 | -5.718134 | 0.480957  |
| 1 | -1.411352 | -5.808918 | -0.837923 |
| 1 | -0.852485 | -5.772264 | 0.836160  |
| 6 | -2.533831 | 4.506576  | -0.754626 |
| 1 | -2.350308 | 4.823881  | -1.788912 |
| 1 | -3.581521 | 4.721139  | -0.528460 |
| 1 | -1.919206 | 5.143193  | -0.106283 |
| 6 | 3.619827  | -4.985213 | -1.055541 |
| 1 | 3.062341  | -5.490886 | -0.259774 |
| 1 | 3.359998  | -5.482539 | -1.999494 |
| 1 | 4.685963  | -5.158078 | -0.880572 |
| 6 | 5.106458  | 2.769279  | -2.340818 |
| 1 | 5.856666  | 2.418521  | -1.620550 |
| 1 | 5.302656  | 2.250747  | -3.287647 |
| 1 | 5.287070  | 3.834597  | -2.503084 |
| 6 | 5.580497  | -2.530054 | -1.829491 |
| 6 | 6.173417  | -3.507584 | -2.530664 |
| 1 | 6.191741  | -1.680743 | -1.525252 |
| 1 | 7.231974  | -3.458962 | -2.767012 |
| 1 | 5.630381  | -4.366537 | -2.911874 |
| 6 | 2.792085  | 4.881696  | -1.850698 |
| 6 | 2.205860  | 5.833846  | -1.108613 |
| 1 | 3.434574  | 5.200239  | -2.670630 |
| 1 | 2.347893  | 6.885160  | -1.339566 |
| 1 | 1.589061  | 5.605651  | -0.243695 |
| 6 | 1.048328  | -3.150322 | 3.414034  |
| 1 | 0.657479  | -2.790336 | 4.369207  |
| 1 | 0.232854  | -3.626319 | 2.864329  |
| 6 | 2.251201  | -4.055286 | 3.579738  |
| 1 | 3.056532  | -3.549256 | 4.120968  |
| 1 | 1.960570  | -4.941862 | 4.152841  |

1 2.633760 -4.382615 2.608009

---

**TS(B-C)<sub>lr</sub>**

---

Number of imaginary frequencies: 1 Electronic energy: HF=-2700.9005444  
Zero-point correction= 0.819333 (Hartree/Particle)  
Thermal correction to Energy= 0.876354  
Thermal correction to Enthalpy= 0.877298  
Thermal correction to Gibbs Free Energy= 0.725496  
Sum of electronic and zero-point Energies= -2700.081211  
Sum of electronic and thermal Energies= -2700.024190  
Sum of electronic and thermal Enthalpies= -2700.023246  
Sum of electronic and thermal Free Energies= -2700.175049

---

Cartesian Coordinates

---

6 3.305664 -3.518970 -1.106635  
6 2.039277 -2.914090 -0.759008  
7 2.123884 -1.540002 -0.870836  
6 3.403302 -1.256080 -1.290499  
6 4.158271 -2.489296 -1.447744  
6 0.886765 -3.611138 -0.411332  
6 -0.373589 -3.077248 -0.174104  
7 -0.681261 -1.732492 -0.194598  
6 -2.035666 -1.633263 0.037439  
6 -2.603376 -2.959079 0.209235  
6 -1.572533 -3.853639 0.079955  
6 -2.753895 -0.443780 0.069475  
6 -2.261622 0.834229 -0.175093  
7 -0.947585 1.130431 -0.457722  
6 -0.883790 2.489880 -0.680832  
6 -2.202588 3.073782 -0.535848  
6 -3.056211 2.050111 -0.212273  
6 0.266349 3.196726 -1.003798  
6 1.544541 2.679936 -1.198731  
7 1.865332 1.348552 -1.104232  
6 3.178375 1.218994 -1.507337  
6 3.710720 2.513076 -1.867273  
6 2.709217 3.433117 -1.645253  
77 0.637341 -0.170086 -0.440790  
6 3.881468 0.021458 -1.574334  
1 0.147847 4.259592 -1.173741  
1 4.903397 0.085692 -1.930609  
1 0.966161 -4.692018 -0.376349  
1 -3.819109 -0.527560 0.250177  
6 1.068703 0.116225 1.541446  
6 0.838338 1.487795 2.161109  
6 -0.425549 1.766010 2.713909  
6 1.807285 2.525060 2.179831  
6 -0.720257 3.002002 3.281106

|   |           |           |           |
|---|-----------|-----------|-----------|
| 1 | -1.185158 | 0.999016  | 2.696994  |
| 6 | 1.509434  | 3.760901  | 2.767955  |
| 6 | 0.252219  | 3.998866  | 3.316215  |
| 1 | -1.705816 | 3.175030  | 3.700956  |
| 1 | 2.261709  | 4.539529  | 2.795760  |
| 1 | 0.040031  | 4.963383  | 3.768111  |
| 6 | 0.488319  | -1.049405 | 2.400634  |
| 8 | -0.661565 | -1.067286 | 2.768006  |
| 8 | 1.387398  | -1.999690 | 2.655990  |
| 8 | 3.018393  | 2.257034  | 1.622929  |
| 6 | 4.083428  | 3.199869  | 1.756099  |
| 1 | 4.956275  | 2.717659  | 1.314429  |
| 1 | 3.862755  | 4.120997  | 1.206883  |
| 1 | 4.280554  | 3.425293  | 2.810124  |
| 7 | 3.695240  | -0.536512 | 1.517882  |
| 7 | 2.657479  | -0.173108 | 1.662549  |
| 6 | -4.531965 | 2.134268  | 0.058700  |
| 1 | -4.806584 | 1.429750  | 0.852934  |
| 1 | -4.784021 | 3.131326  | 0.432580  |
| 6 | -5.414037 | 1.854179  | -1.184762 |
| 1 | -5.257058 | 0.841293  | -1.558923 |
| 1 | -5.153493 | 2.559837  | -1.981569 |
| 6 | -6.873042 | 2.081334  | -0.844827 |
| 8 | -7.341947 | 3.119317  | -0.445290 |
| 8 | -7.638778 | 0.959709  | -1.013862 |
| 1 | -8.555565 | 1.207617  | -0.780982 |
| 6 | -4.065948 | -3.238946 | 0.411621  |
| 1 | -4.499491 | -2.467984 | 1.054308  |
| 1 | -4.188034 | -4.183297 | 0.951070  |
| 6 | -4.865785 | -3.313471 | -0.926013 |
| 1 | -4.264688 | -2.879796 | -1.735732 |
| 1 | -5.079974 | -4.346419 | -1.207456 |
| 6 | -6.180634 | -2.556305 | -0.938226 |
| 8 | -7.223383 | -2.963718 | -1.390940 |
| 8 | -6.036619 | -1.304578 | -0.426221 |
| 1 | -6.866202 | -0.802475 | -0.581689 |
| 6 | -1.624945 | -5.351554 | 0.129590  |
| 1 | -2.606558 | -5.703146 | 0.458246  |
| 1 | -1.432016 | -5.795149 | -0.855706 |
| 1 | -0.880255 | -5.764803 | 0.820863  |
| 6 | -2.512889 | 4.528793  | -0.719051 |
| 1 | -2.328304 | 4.853814  | -1.750746 |
| 1 | -3.559503 | 4.746232  | -0.490683 |
| 1 | -1.895016 | 5.157043  | -0.065723 |
| 6 | 3.595711  | -4.988284 | -1.068611 |
| 1 | 3.046344  | -5.490323 | -0.264985 |
| 1 | 3.322114  | -5.485801 | -2.008560 |
| 1 | 4.663226  | -5.165056 | -0.906648 |
| 6 | 5.102353  | 2.757433  | -2.368966 |
| 1 | 5.860084  | 2.400906  | -1.659493 |

|   |          |           |           |
|---|----------|-----------|-----------|
| 1 | 5.283609 | 2.240452  | -3.319600 |
| 1 | 5.286133 | 3.822297  | -2.530688 |
| 6 | 5.557292 | -2.542185 | -1.867315 |
| 6 | 6.136893 | -3.522336 | -2.575857 |
| 1 | 6.176136 | -1.695995 | -1.569988 |
| 1 | 7.192763 | -3.478851 | -2.824886 |
| 1 | 5.585102 | -4.378484 | -2.950766 |
| 6 | 2.806576 | 4.881223  | -1.840116 |
| 6 | 2.240293 | 5.830871  | -1.079789 |
| 1 | 3.434916 | 5.201289  | -2.670362 |
| 1 | 2.383604 | 6.883191  | -1.305348 |
| 1 | 1.639801 | 5.598766  | -0.204456 |
| 6 | 0.915297 | -3.139048 | 3.444978  |
| 1 | 0.527573 | -2.753292 | 4.391367  |
| 1 | 0.090568 | -3.601604 | 2.897449  |
| 6 | 2.090946 | -4.074814 | 3.634805  |
| 1 | 2.906356 | -3.582880 | 4.173958  |
| 1 | 1.771379 | -4.943474 | 4.219809  |
| 1 | 2.471264 | -4.428607 | 2.671472  |

---

**Cr**

---

Number of imaginary frequencies: 0    Electronic energy:    HF=-2700.9575091  
Zero-point correction=                    0.817889 (Hartree/Particle)  
Thermal correction to Energy=            0.877395  
Thermal correction to Enthalpy=         0.878339  
Thermal correction to Gibbs Free Energy= 0.716051  
Sum of electronic and zero-point Energies= -2700.139620  
Sum of electronic and thermal Energies= -2700.080114  
Sum of electronic and thermal Enthalpies= -2700.079170  
Sum of electronic and thermal Free Energies= -2700.241458

.....  
Cartesian Coordinates

.....  

|   |           |           |           |
|---|-----------|-----------|-----------|
| 6 | 3.091668  | -3.065728 | -1.763396 |
| 6 | 1.875149  | -2.533685 | -1.204085 |
| 7 | 1.908132  | -1.150107 | -1.234786 |
| 6 | 3.121411  | -0.791343 | -1.788897 |
| 6 | 3.859173  | -1.983713 | -2.156686 |
| 6 | 0.801898  | -3.299607 | -0.760281 |
| 6 | -0.446431 | -2.829386 | -0.379597 |
| 7 | -0.789865 | -1.498153 | -0.298206 |
| 6 | -2.144119 | -1.448811 | -0.056168 |
| 6 | -2.671016 | -2.798588 | 0.049863  |
| 6 | -1.614545 | -3.654158 | -0.138740 |
| 6 | -2.891044 | -0.281221 | 0.042621  |
| 6 | -2.417170 | 1.018534  | -0.077805 |
| 7 | -1.105742 | 1.372204  | -0.335404 |
| 6 | -1.050245 | 2.752878  | -0.307388 |
| 6 | -2.371477 | 3.287142  | -0.066073 |

|    |           |           |           |
|----|-----------|-----------|-----------|
| 6  | -3.218050 | 2.213852  | 0.077170  |
| 6  | 0.093767  | 3.518208  | -0.491885 |
| 6  | 1.360380  | 3.049596  | -0.818817 |
| 7  | 1.674267  | 1.721552  | -0.983899 |
| 6  | 2.925575  | 1.673637  | -1.562064 |
| 6  | 3.440891  | 3.012433  | -1.729872 |
| 6  | 2.489499  | 3.873590  | -1.229123 |
| 77 | 0.501816  | 0.109124  | -0.456126 |
| 6  | 3.574578  | 0.510964  | -1.954481 |
| 1  | -0.029371 | 4.593550  | -0.458387 |
| 1  | 4.534472  | 0.635978  | -2.441938 |
| 1  | 0.925870  | -4.375676 | -0.796598 |
| 1  | -3.953140 | -0.397968 | 0.220255  |
| 6  | 0.871144  | 0.175301  | 1.392074  |
| 6  | 1.867003  | 0.987625  | 2.093540  |
| 6  | 1.388891  | 1.957522  | 3.006073  |
| 6  | 3.271340  | 0.835242  | 1.935654  |
| 6  | 2.261277  | 2.814389  | 3.665127  |
| 1  | 0.318573  | 2.049860  | 3.152901  |
| 6  | 4.141394  | 1.692772  | 2.619754  |
| 6  | 3.636801  | 2.681294  | 3.463641  |
| 1  | 1.871468  | 3.574204  | 4.334660  |
| 1  | 5.213244  | 1.584349  | 2.509680  |
| 1  | 4.329848  | 3.337921  | 3.981468  |
| 6  | -0.127644 | -0.467661 | 2.330968  |
| 8  | -1.125459 | 0.119146  | 2.698057  |
| 8  | 0.264879  | -1.675190 | 2.725812  |
| 8  | 3.682118  | -0.205199 | 1.175688  |
| 6  | 5.079022  | -0.486515 | 1.099675  |
| 1  | 5.163835  | -1.379100 | 0.480735  |
| 1  | 5.625249  | 0.339195  | 0.628622  |
| 1  | 5.492166  | -0.686714 | 2.094247  |
| 7  | 3.153077  | -4.034747 | 1.943274  |
| 7  | 3.628711  | -3.264023 | 2.576540  |
| 6  | -4.693108 | 2.238581  | 0.362801  |
| 1  | -4.946852 | 1.445259  | 1.075807  |
| 1  | -4.961368 | 3.182388  | 0.846450  |
| 6  | -5.575839 | 2.080406  | -0.901901 |
| 1  | -5.398319 | 1.119861  | -1.388579 |
| 1  | -5.336380 | 2.877365  | -1.614626 |
| 6  | -7.037667 | 2.233365  | -0.533684 |
| 8  | -7.533313 | 3.217458  | -0.041877 |
| 8  | -7.771042 | 1.107048  | -0.794271 |
| 1  | -8.692182 | 1.304182  | -0.531875 |
| 6  | -4.123768 | -3.130694 | 0.249983  |
| 1  | -4.568204 | -2.417510 | 0.949726  |
| 1  | -4.212423 | -4.113274 | 0.723676  |
| 6  | -4.943711 | -3.135353 | -1.078045 |
| 1  | -4.356062 | -2.658300 | -1.873090 |
| 1  | -5.160483 | -4.152338 | -1.410846 |

|   |           |           |           |
|---|-----------|-----------|-----------|
| 6 | -6.261517 | -2.383465 | -1.030641 |
| 8 | -7.306012 | -2.767163 | -1.499428 |
| 8 | -6.118683 | -1.166629 | -0.441000 |
| 1 | -6.953822 | -0.660630 | -0.548942 |
| 6 | -1.619282 | -5.153205 | -0.166342 |
| 1 | -2.575824 | -5.553555 | 0.180111  |
| 1 | -1.452810 | -5.538596 | -1.180514 |
| 1 | -0.834085 | -5.573935 | 0.473110  |
| 6 | -2.695981 | 4.749016  | 0.001915  |
| 1 | -2.540004 | 5.239807  | -0.967042 |
| 1 | -3.737365 | 4.914653  | 0.288773  |
| 1 | -2.065970 | 5.268975  | 0.733579  |
| 6 | 3.424312  | -4.523016 | -1.860620 |
| 1 | 3.030485  | -5.083471 | -1.006675 |
| 1 | 3.012417  | -4.977854 | -2.771351 |
| 1 | 4.508040  | -4.669112 | -1.886551 |
| 6 | 4.775186  | 3.347595  | -2.324744 |
| 1 | 5.597260  | 2.897983  | -1.753433 |
| 1 | 4.859935  | 2.984508  | -3.356597 |
| 1 | 4.944026  | 4.426922  | -2.337843 |
| 6 | 5.176731  | -1.967827 | -2.790358 |
| 6 | 5.659131  | -2.886496 | -3.640268 |
| 1 | 5.814226  | -1.118218 | -2.548663 |
| 1 | 6.659157  | -2.791177 | -4.052020 |
| 1 | 5.076580  | -3.738900 | -3.974612 |
| 6 | 2.581758  | 5.332453  | -1.163012 |
| 6 | 2.106219  | 6.110063  | -0.179424 |
| 1 | 3.120409  | 5.809316  | -1.980759 |
| 1 | 2.231293  | 7.188063  | -0.210534 |
| 1 | 1.610924  | 5.701999  | 0.697289  |
| 6 | -0.604868 | -2.353957 | 3.687852  |
| 1 | -0.776601 | -1.676426 | 4.528180  |
| 1 | -1.562937 | -2.542503 | 3.195661  |
| 6 | 0.089783  | -3.632424 | 4.108654  |
| 1 | 1.049997  | -3.419139 | 4.587923  |
| 1 | -0.540157 | -4.168108 | 4.826553  |
| 1 | 0.266078  | -4.286900 | 3.249452  |

---

**TS(C-P)<sub>Ir</sub>**

---

Number of imaginary frequencies: 3    Electronic energy:    HF=-2591.3873191  
Zero-point correction=                    0.808646 (Hartree/Particle)  
Thermal correction to Energy=            0.860904  
Thermal correction to Enthalpy=         0.861849  
Thermal correction to Gibbs Free Energy= 0.721229  
Sum of electronic and zero-point Energies= -2590.578673  
Sum of electronic and thermal Energies= -2590.526415  
Sum of electronic and thermal Enthalpies= -2590.525470  
Sum of electronic and thermal Free Energies= -2590.666090

---



## Cartesian Coordinates

|   |           |           |           |
|---|-----------|-----------|-----------|
| 6 | 3.219182  | -3.428930 | -1.394331 |
| 6 | 1.976871  | -2.809187 | -1.003611 |
| 7 | 2.098235  | -1.432351 | -1.058685 |
| 6 | 3.380105  | -1.159960 | -1.486980 |
| 6 | 4.095608  | -2.404250 | -1.710053 |
| 6 | 0.810798  | -3.493112 | -0.656543 |
| 6 | -0.427048 | -2.941443 | -0.365375 |
| 7 | -0.698402 | -1.590049 | -0.310948 |
| 6 | -2.042281 | -1.463925 | -0.057352 |
| 6 | -2.647560 | -2.782982 | 0.056915  |
| 6 | -1.643988 | -3.697714 | -0.128079 |
| 6 | -2.721013 | -0.253715 | 0.049112  |
| 6 | -2.184083 | 1.016252  | -0.116312 |
| 7 | -0.857877 | 1.290542  | -0.391407 |
| 6 | -0.760922 | 2.660536  | -0.544198 |
| 6 | -2.061533 | 3.269521  | -0.350922 |
| 6 | -2.940325 | 2.253133  | -0.071865 |
| 6 | 0.404857  | 3.354664  | -0.836628 |
| 6 | 1.668001  | 2.812635  | -1.055459 |
| 7 | 1.949472  | 1.467527  | -1.049143 |
| 6 | 3.258416  | 1.330265  | -1.473610 |
| 6 | 3.831242  | 2.632762  | -1.728634 |
| 6 | 2.853806  | 3.560420  | -1.443312 |
| 6 | 3.906602  | 0.115614  | -1.665422 |
| 1 | 0.316551  | 4.428246  | -0.949081 |
| 1 | 4.925157  | 0.165976  | -2.030604 |
| 1 | 0.864908  | -4.575909 | -0.668508 |
| 1 | -3.786696 | -0.310707 | 0.236061  |
| 6 | -4.408737 | 2.366713  | 0.226425  |
| 1 | -4.694320 | 1.623263  | 0.979745  |
| 1 | -4.621568 | 3.345823  | 0.666249  |
| 6 | -5.314943 | 2.195189  | -1.019888 |
| 1 | -5.198765 | 1.202078  | -1.456882 |
| 1 | -5.038836 | 2.939128  | -1.775372 |
| 6 | -6.760741 | 2.452550  | -0.646909 |
| 8 | -7.192235 | 3.488830  | -0.203893 |
| 8 | -7.562121 | 1.359530  | -0.839871 |
| 1 | -8.466643 | 1.624982  | -0.580031 |
| 6 | -4.116268 | -3.028267 | 0.262488  |
| 1 | -4.517643 | -2.284134 | 0.956039  |
| 1 | -4.263193 | -4.000138 | 0.743856  |
| 6 | -4.934709 | -2.993581 | -1.065456 |
| 1 | -4.328871 | -2.532222 | -1.856083 |
| 1 | -5.188075 | -3.999553 | -1.405852 |
| 6 | -6.222632 | -2.192483 | -1.012793 |
| 8 | -7.282229 | -2.533522 | -1.480824 |
| 8 | -6.030512 | -0.984062 | -0.419832 |
| 1 | -6.842460 | -0.442719 | -0.532039 |

|   |           |           |           |
|---|-----------|-----------|-----------|
| 6 | -1.733681 | -5.194246 | -0.141313 |
| 1 | -2.723443 | -5.535641 | 0.173431  |
| 1 | -1.552328 | -5.600543 | -1.144632 |
| 1 | -0.998084 | -5.652417 | 0.531120  |
| 6 | -2.336397 | 4.739264  | -0.455514 |
| 1 | -2.182356 | 5.104315  | -1.478934 |
| 1 | -3.366407 | 4.974362  | -0.175558 |
| 1 | -1.676095 | 5.322544  | 0.197741  |
| 6 | 3.474485  | -4.905304 | -1.423990 |
| 1 | 2.900122  | -5.433954 | -0.656220 |
| 1 | 3.205324  | -5.347560 | -2.392347 |
| 1 | 4.534866  | -5.116931 | -1.255677 |
| 6 | 5.225331  | 2.924047  | -2.199982 |
| 1 | 5.216569  | 3.447618  | -3.164362 |
| 1 | 5.755753  | 3.568667  | -1.489435 |
| 1 | 5.823010  | 2.018686  | -2.331130 |
| 6 | 5.485278  | -2.479973 | -2.155950 |
| 6 | 6.033115  | -3.460853 | -2.888888 |
| 1 | 6.125932  | -1.648268 | -1.865126 |
| 1 | 7.083459  | -3.428834 | -3.161642 |
| 1 | 5.460996  | -4.303293 | -3.263633 |
| 6 | 3.005758  | 5.010660  | -1.552536 |
| 6 | 2.462467  | 5.939321  | -0.751736 |
| 1 | 3.667538  | 5.347437  | -2.350341 |
| 1 | 2.650851  | 6.995910  | -0.915159 |
| 1 | 1.844893  | 5.683106  | 0.104409  |
| 6 | 1.178986  | -0.193937 | 1.436678  |
| 6 | 1.954755  | 0.895048  | 2.140008  |
| 6 | 0.037340  | -0.665158 | 2.345707  |
| 6 | 1.489192  | 2.209721  | 2.267916  |
| 6 | 3.109967  | 0.567713  | 2.872611  |
| 8 | -0.863126 | 0.070238  | 2.682280  |
| 8 | 0.204017  | -1.934762 | 2.740917  |
| 6 | 2.196820  | 3.151346  | 3.017081  |
| 1 | 0.564886  | 2.484907  | 1.777864  |
| 6 | 3.828065  | 1.479276  | 3.631415  |
| 8 | 3.456080  | -0.793848 | 2.956679  |
| 6 | 3.369024  | 2.795623  | 3.687376  |
| 1 | 1.825474  | 4.169549  | 3.079649  |
| 1 | 4.709675  | 1.153591  | 4.173049  |
| 6 | 3.269162  | -1.468154 | 1.836244  |
| 1 | 3.915588  | 3.531385  | 4.268582  |
| 1 | 3.180001  | -2.542575 | 1.973553  |
| 1 | 3.718828  | -1.077221 | 0.924357  |
| 1 | 1.918598  | -1.108808 | 1.427586  |
| 6 | -0.797037 | -2.474665 | 3.659333  |
| 1 | -1.772203 | -2.076532 | 3.373030  |
| 1 | -0.771526 | -3.549117 | 3.468632  |
| 6 | -0.451449 | -2.143463 | 5.101124  |
| 1 | -0.492353 | -1.064396 | 5.274622  |

|    |           |           |           |
|----|-----------|-----------|-----------|
| 1  | -1.174847 | -2.623534 | 5.769328  |
| 1  | 0.547245  | -2.509407 | 5.360101  |
| 77 | 0.668859  | -0.058155 | -0.512902 |

-----

**A<sub>Ir(Cl)</sub>**

-----

Number of imaginary frequencies: 0    Electronic energy:    HF=-2399.8125195  
Zero-point correction=                    0.599343 (Hartree/Particle)  
Thermal correction to Energy=            0.642032  
Thermal correction to Enthalpy=         0.642976  
Thermal correction to Gibbs Free Energy= 0.518876  
Sum of electronic and zero-point Energies= -2399.213177  
Sum of electronic and thermal Energies= -2399.170487  
Sum of electronic and thermal Enthalpies= -2399.169543  
Sum of electronic and thermal Free Energies= -2399.293644

.....

Cartesian Coordinates

.....

|    |           |           |           |
|----|-----------|-----------|-----------|
| 6  | 3.586597  | 3.295475  | 0.244171  |
| 6  | 2.279040  | 2.661538  | 0.149864  |
| 7  | 2.429922  | 1.307059  | -0.008175 |
| 6  | 3.782583  | 1.049554  | -0.000358 |
| 6  | 4.520782  | 2.285805  | 0.148778  |
| 6  | 1.056851  | 3.321041  | 0.225782  |
| 6  | -0.207609 | 2.752412  | 0.143583  |
| 7  | -0.462035 | 1.408718  | -0.001946 |
| 6  | -1.828553 | 1.260394  | -0.014933 |
| 6  | -2.465230 | 2.562698  | 0.095772  |
| 6  | -1.458598 | 3.486731  | 0.196990  |
| 6  | -2.494062 | 0.043164  | -0.105744 |
| 6  | -1.921370 | -1.220124 | -0.209717 |
| 7  | -0.571123 | -1.468726 | -0.249402 |
| 6  | -0.418964 | -2.833049 | -0.342013 |
| 6  | -1.721800 | -3.471546 | -0.384909 |
| 6  | -2.655206 | -2.471887 | -0.304193 |
| 6  | 0.799695  | -3.495422 | -0.395344 |
| 6  | 2.067958  | -2.922117 | -0.384089 |
| 7  | 2.324952  | -1.572930 | -0.297403 |
| 6  | 3.690889  | -1.419495 | -0.318320 |
| 6  | 4.324821  | -2.723585 | -0.476324 |
| 6  | 3.309711  | -3.653897 | -0.487306 |
| 77 | 0.931277  | -0.091548 | -0.033092 |
| 6  | 4.353572  | -0.211023 | -0.141999 |
| 1  | 0.760098  | -4.577683 | -0.461631 |
| 1  | 5.434159  | -0.262730 | -0.097529 |
| 1  | 1.092356  | 4.395316  | 0.369035  |
| 1  | -3.577999 | 0.082883  | -0.091225 |
| 17 | 0.940586  | -0.310922 | 2.288582  |
| 6  | -1.941184 | -4.950517 | -0.496827 |

|   |           |           |           |
|---|-----------|-----------|-----------|
| 1 | -3.002333 | -5.188524 | -0.614045 |
| 1 | -1.412118 | -5.373945 | -1.359850 |
| 1 | -1.581550 | -5.482016 | 0.394102  |
| 6 | 3.415298  | -5.141864 | -0.634585 |
| 1 | 2.964408  | -5.487982 | -1.574069 |
| 1 | 4.458296  | -5.469564 | -0.636643 |
| 1 | 2.902813  | -5.665589 | 0.182176  |
| 6 | 6.014168  | 2.402755  | 0.137860  |
| 1 | 6.474303  | 1.649002  | -0.510064 |
| 1 | 6.321096  | 3.389746  | -0.222625 |
| 1 | 6.444393  | 2.273067  | 1.140430  |
| 6 | -1.564267 | 4.975918  | 0.335311  |
| 1 | -1.128994 | 5.496754  | -0.527726 |
| 1 | -2.606854 | 5.295525  | 0.419054  |
| 1 | -1.037423 | 5.335639  | 1.228122  |
| 6 | 5.753885  | -3.007092 | -0.604107 |
| 6 | 6.671797  | -2.267402 | -1.244542 |
| 1 | 6.084552  | -3.941378 | -0.150105 |
| 1 | 7.711569  | -2.579162 | -1.280987 |
| 1 | 6.418432  | -1.353937 | -1.774293 |
| 6 | 3.787626  | 4.736161  | 0.366962  |
| 6 | 4.808319  | 5.355478  | 0.979896  |
| 1 | 3.019781  | 5.360699  | -0.089751 |
| 1 | 4.871556  | 6.439637  | 0.997328  |
| 1 | 5.591607  | 4.814602  | 1.501361  |
| 6 | -4.152295 | -2.596329 | -0.280409 |
| 6 | -4.729772 | -2.591079 | 1.146219  |
| 1 | -4.462643 | -3.519171 | -0.781337 |
| 1 | -4.617903 | -1.785946 | -0.852568 |
| 1 | -4.330568 | -3.424909 | 1.736580  |
| 1 | -4.435600 | -1.684708 | 1.690554  |
| 6 | -3.948317 | 2.802312  | 0.070812  |
| 6 | -4.527040 | 2.833856  | -1.354695 |
| 1 | -4.185207 | 3.748963  | 0.566847  |
| 1 | -4.474232 | 2.033927  | 0.648836  |
| 1 | -4.058940 | 3.626262  | -1.952056 |
| 1 | -4.314267 | 1.900921  | -1.891892 |
| 6 | -6.240956 | -2.677986 | 1.157343  |
| 8 | -6.959303 | -2.699429 | 0.181483  |
| 8 | -6.726816 | -2.728191 | 2.421911  |
| 1 | -7.698313 | -2.771286 | 2.336982  |
| 6 | -6.024975 | 3.053014  | -1.366743 |
| 8 | -6.733622 | 3.178409  | -0.392059 |
| 8 | -6.510470 | 3.095148  | -2.632291 |
| 1 | -7.473478 | 3.230793  | -2.547844 |

-----

**B<sub>IR</sub>(Cl)**

-----

Number of imaginary frequencies: 0    Electronic energy:    HF=-3161.3263613  
Zero-point correction=                      0.821602 (Hartree/Particle)

|                                              |              |
|----------------------------------------------|--------------|
| Thermal correction to Energy=                | 0.881397     |
| Thermal correction to Enthalpy=              | 0.882341     |
| Thermal correction to Gibbs Free Energy=     | 0.719563     |
| Sum of electronic and zero-point Energies=   | -3160.504759 |
| Sum of electronic and thermal Energies=      | -3160.444964 |
| Sum of electronic and thermal Enthalpies=    | -3160.444020 |
| Sum of electronic and thermal Free Energies= | -3160.606798 |

.....  
Cartesian Coordinates  
.....

|    |           |           |           |
|----|-----------|-----------|-----------|
| 6  | -4.113223 | 3.581354  | 0.658929  |
| 6  | -2.779814 | 3.057782  | 0.450407  |
| 7  | -2.847838 | 1.768480  | -0.024926 |
| 6  | -4.179807 | 1.462016  | -0.158734 |
| 6  | -4.991704 | 2.592155  | 0.271537  |
| 6  | -1.598709 | 3.755892  | 0.687092  |
| 6  | -0.302681 | 3.297128  | 0.497514  |
| 7  | 0.034428  | 2.041489  | 0.046663  |
| 6  | 1.404828  | 1.994585  | -0.022282 |
| 6  | 1.960242  | 3.269544  | 0.408909  |
| 6  | 0.901058  | 4.073368  | 0.737499  |
| 6  | 2.147037  | 0.887152  | -0.423641 |
| 6  | 1.651772  | -0.344321 | -0.838550 |
| 7  | 0.317740  | -0.659376 | -0.941687 |
| 6  | 0.247077  | -1.942727 | -1.429583 |
| 6  | 1.585375  | -2.474168 | -1.613454 |
| 6  | 2.457890  | -1.488635 | -1.235543 |
| 6  | -0.926173 | -2.639777 | -1.684456 |
| 6  | -2.227516 | -2.197154 | -1.470131 |
| 7  | -2.559700 | -0.940770 | -1.024355 |
| 6  | -3.933974 | -0.853950 | -1.040251 |
| 6  | -4.499331 | -2.103878 | -1.492220 |
| 6  | -3.444003 | -2.957567 | -1.733772 |
| 77 | -1.263045 | 0.586786  | -0.583555 |
| 6  | -4.671547 | 0.258753  | -0.648254 |
| 1  | -0.817747 | -3.634901 | -2.096982 |
| 1  | -5.749188 | 0.173767  | -0.734913 |
| 1  | -1.701488 | 4.773649  | 1.047612  |
| 1  | 3.225103  | 0.998565  | -0.421078 |
| 6  | 1.247968  | -1.876937 | 3.106502  |
| 6  | 0.838088  | -3.197444 | 2.584526  |
| 6  | 1.796352  | -4.194530 | 2.350621  |
| 6  | -0.520664 | -3.494291 | 2.309569  |
| 6  | 1.431075  | -5.451330 | 1.867129  |
| 1  | 2.837730  | -3.967594 | 2.540131  |
| 6  | -0.887057 | -4.762470 | 1.848161  |
| 6  | 0.088953  | -5.737288 | 1.625869  |
| 1  | 2.194931  | -6.204475 | 1.697419  |
| 1  | -1.927741 | -4.991448 | 1.651061  |
| 1  | -0.210319 | -6.718815 | 1.268011  |

|   |           |           |           |
|---|-----------|-----------|-----------|
| 6 | 2.552779  | -1.245477 | 2.867016  |
| 8 | 3.448540  | -1.724174 | 2.192427  |
| 8 | 2.651183  | -0.052359 | 3.503527  |
| 8 | -1.409638 | -2.480368 | 2.521466  |
| 6 | -2.793769 | -2.722227 | 2.303133  |
| 1 | -3.297150 | -1.781224 | 2.529781  |
| 1 | -2.991910 | -2.997838 | 1.261434  |
| 1 | -3.168218 | -3.508994 | 2.970915  |
| 7 | -0.249999 | -0.605102 | 4.579169  |
| 7 | 0.435043  | -1.199851 | 3.895592  |
| 6 | 3.958464  | -1.555984 | -1.196908 |
| 1 | 4.329404  | -1.054345 | -0.296677 |
| 1 | 4.277199  | -2.599363 | -1.114167 |
| 6 | 4.633167  | -0.945059 | -2.455355 |
| 1 | 4.408745  | 0.119601  | -2.539700 |
| 1 | 4.249656  | -1.451384 | -3.347594 |
| 6 | 6.126575  | -1.175986 | -2.421467 |
| 8 | 6.678429  | -2.248139 | -2.496699 |
| 8 | 6.849342  | -0.018585 | -2.266807 |
| 1 | 7.788734  | -0.286221 | -2.247364 |
| 6 | 3.427228  | 3.596287  | 0.408104  |
| 1 | 3.990907  | 2.747171  | 0.805377  |
| 1 | 3.623735  | 4.434281  | 1.084651  |
| 6 | 3.974522  | 3.951579  | -1.008122 |
| 1 | 3.268423  | 3.590548  | -1.767094 |
| 1 | 4.064636  | 5.031286  | -1.145872 |
| 6 | 5.310543  | 3.328204  | -1.362898 |
| 8 | 6.227168  | 3.886592  | -1.921869 |
| 8 | 5.342302  | 2.012255  | -1.030896 |
| 1 | 6.142417  | 1.596750  | -1.418277 |
| 6 | 0.914790  | 5.488732  | 1.232310  |
| 1 | 1.936017  | 5.844922  | 1.396211  |
| 1 | 0.441002  | 6.171948  | 0.515449  |
| 1 | 0.373524  | 5.591287  | 2.181415  |
| 6 | 1.888613  | -3.863888 | -2.086448 |
| 1 | 1.445505  | -4.061437 | -3.070844 |
| 1 | 2.965971  | -4.030341 | -2.173056 |
| 1 | 1.493347  | -4.616134 | -1.392027 |
| 6 | -4.426207 | 4.927688  | 1.236570  |
| 1 | -3.679426 | 5.231092  | 1.978401  |
| 1 | -4.456026 | 5.710809  | 0.466409  |
| 1 | -5.404101 | 4.918433  | 1.728342  |
| 6 | -5.967384 | -2.383130 | -1.612529 |
| 1 | -6.473193 | -2.325347 | -0.639523 |
| 1 | -6.460731 | -1.660760 | -2.274929 |
| 1 | -6.152871 | -3.382945 | -2.013910 |
| 6 | -6.451080 | 2.582704  | 0.304757  |
| 6 | -7.265300 | 3.638388  | 0.150773  |
| 1 | -6.913557 | 1.609585  | 0.470509  |
| 1 | -8.343557 | 3.523150  | 0.212430  |

|    |           |           |           |
|----|-----------|-----------|-----------|
| 1  | -6.894910 | 4.635421  | -0.065572 |
| 6  | -3.549506 | -4.350718 | -2.167615 |
| 6  | -2.753728 | -5.374586 | -1.821922 |
| 1  | -4.394379 | -4.567975 | -2.821338 |
| 1  | -2.936400 | -6.372998 | -2.208852 |
| 1  | -1.920738 | -5.264108 | -1.133870 |
| 6  | 3.908028  | 0.641111  | 3.359257  |
| 1  | 4.704470  | 0.021616  | 3.785472  |
| 1  | 4.121882  | 0.769176  | 2.293712  |
| 6  | 3.773851  | 1.971569  | 4.076890  |
| 1  | 3.545011  | 1.823240  | 5.137138  |
| 1  | 4.713327  | 2.530172  | 4.001647  |
| 1  | 2.974913  | 2.572829  | 3.631148  |
| 17 | -1.284318 | 1.406246  | -2.766667 |

---

**TS(B-B')<sub>Ir(Cl)</sub>**

---

Number of imaginary frequencies: 1    Electronic energy:    HF=-3162.34307388  
Zero-point correction=                    0.821764 (Hartree/Particle)  
Thermal correction to Energy=            0.880181  
Thermal correction to Enthalpy=         0.881125  
Thermal correction to Gibbs Free Energy= 0.725972  
Sum of electronic and zero-point Energies= -3160.504447  
Sum of electronic and thermal Energies= -3160.446029  
Sum of electronic and thermal Enthalpies= -3160.445085  
Sum of electronic and thermal Free Energies= -3160.600239

.....  
Cartesian Coordinates

.....

|   |           |           |           |
|---|-----------|-----------|-----------|
| 6 | -3.368022 | 3.475295  | -1.045374 |
| 6 | -2.078884 | 2.897766  | -0.725656 |
| 7 | -2.140244 | 1.527762  | -0.824234 |
| 6 | -3.408953 | 1.211173  | -1.241013 |
| 6 | -4.200094 | 2.427336  | -1.375004 |
| 6 | -0.936981 | 3.621778  | -0.393678 |
| 6 | 0.327176  | 3.116743  | -0.111568 |
| 7 | 0.668930  | 1.786608  | -0.107121 |
| 6 | 2.006625  | 1.711685  | 0.192179  |
| 6 | 2.529901  | 3.049454  | 0.426550  |
| 6 | 1.488140  | 3.919912  | 0.225103  |
| 6 | 2.748968  | 0.535263  | 0.222676  |
| 6 | 2.295436  | -0.748468 | -0.064073 |
| 7 | 0.995388  | -1.078213 | -0.354951 |
| 6 | 0.961274  | -2.428606 | -0.592500 |
| 6 | 2.291438  | -2.986624 | -0.436842 |
| 6 | 3.119984  | -1.945884 | -0.108502 |
| 6 | -0.172976 | -3.161659 | -0.922349 |
| 6 | -1.464329 | -2.675598 | -1.095950 |
| 7 | -1.815039 | -1.350883 | -1.032654 |
| 6 | -3.130001 | -1.256082 | -1.420684 |

|    |           |           |           |
|----|-----------|-----------|-----------|
| 6  | -3.651263 | -2.573073 | -1.709849 |
| 6  | -2.629468 | -3.467613 | -1.477449 |
| 77 | -0.562971 | 0.224103  | -0.613878 |
| 6  | -3.856585 | -0.073307 | -1.522493 |
| 1  | -0.033207 | -4.223005 | -1.085351 |
| 1  | -4.878301 | -0.166374 | -1.873431 |
| 1  | -1.037926 | 4.701621  | -0.376212 |
| 1  | 3.796474  | 0.632232  | 0.481293  |
| 6  | -1.252895 | -0.226592 | 2.324746  |
| 6  | -0.960512 | -1.670493 | 2.539625  |
| 6  | 0.353891  | -2.085341 | 2.805724  |
| 6  | -1.970014 | -2.666862 | 2.506156  |
| 6  | 0.661706  | -3.424042 | 3.049179  |
| 1  | 1.136754  | -1.341920 | 2.829441  |
| 6  | -1.657471 | -4.006852 | 2.748417  |
| 6  | -0.342054 | -4.386691 | 3.022603  |
| 1  | 1.690493  | -3.703145 | 3.256123  |
| 1  | -2.439131 | -4.756762 | 2.727396  |
| 1  | -0.115921 | -5.431758 | 3.216562  |
| 6  | -0.403064 | 0.863734  | 2.892040  |
| 8  | 0.747265  | 0.729737  | 3.258247  |
| 8  | -1.079368 | 2.028908  | 2.971295  |
| 8  | -3.237206 | -2.235967 | 2.237663  |
| 6  | -4.286591 | -3.187121 | 2.135700  |
| 1  | -5.182593 | -2.612303 | 1.894316  |
| 1  | -4.089420 | -3.910934 | 1.336244  |
| 1  | -4.440470 | -3.716300 | 3.085038  |
| 7  | -3.513507 | 0.657866  | 1.898872  |
| 7  | -2.505241 | 0.190159  | 2.100379  |
| 6  | 4.609088  | -1.989160 | 0.084468  |
| 1  | 4.931622  | -1.227691 | 0.802333  |
| 1  | 4.897966  | -2.956539 | 0.512491  |
| 6  | 5.372695  | -1.788423 | -1.255960 |
| 1  | 5.153673  | -0.795188 | -1.665183 |
| 1  | 5.057375  | -2.539375 | -1.983342 |
| 6  | 6.864806  | -1.924110 | -1.091980 |
| 8  | 7.576857  | -2.791181 | -1.536565 |
| 8  | 7.389306  | -0.914934 | -0.314232 |
| 1  | 8.350396  | -1.078127 | -0.261600 |
| 6  | 3.938568  | 3.404830  | 0.818687  |
| 1  | 4.325107  | 2.699296  | 1.561767  |
| 1  | 3.919076  | 4.380634  | 1.315223  |
| 6  | 4.955729  | 3.501456  | -0.355750 |
| 1  | 4.492042  | 3.937433  | -1.243062 |
| 1  | 5.780537  | 4.153943  | -0.041595 |
| 6  | 5.578246  | 2.179442  | -0.754406 |
| 8  | 5.546487  | 1.685613  | -1.862620 |
| 8  | 6.207651  | 1.597809  | 0.293641  |
| 1  | 6.618245  | 0.759176  | -0.017767 |
| 6  | 1.487114  | 5.418313  | 0.301430  |



|    |           |           |           |
|----|-----------|-----------|-----------|
| 1  | 2.438080  | 5.803255  | 0.680957  |
| 1  | 1.323883  | 5.870805  | -0.685570 |
| 1  | 0.694288  | 5.793728  | 0.960792  |
| 6  | 2.632429  | -4.435488 | -0.614905 |
| 1  | 2.454404  | -4.770735 | -1.644793 |
| 1  | 3.683766  | -4.631894 | -0.384450 |
| 1  | 2.025303  | -5.071821 | 0.041434  |
| 6  | -3.696989 | 4.935184  | -0.975885 |
| 1  | -3.139118 | 5.437087  | -0.177532 |
| 1  | -3.461157 | 5.457367  | -1.913520 |
| 1  | -4.764643 | 5.081220  | -0.782912 |
| 6  | -5.058097 | -2.859259 | -2.142408 |
| 1  | -5.210732 | -3.925941 | -2.328140 |
| 1  | -5.788671 | -2.553412 | -1.381634 |
| 1  | -5.312063 | -2.321332 | -3.064553 |
| 6  | -5.611196 | 2.445460  | -1.747553 |
| 6  | -6.258491 | 3.422615  | -2.401404 |
| 1  | -6.186132 | 1.565689  | -1.458363 |
| 1  | -7.321107 | 3.342353  | -2.611767 |
| 1  | -5.756474 | 4.311911  | -2.769141 |
| 6  | -2.717243 | -4.922617 | -1.593494 |
| 6  | -2.093835 | -5.834496 | -0.830218 |
| 1  | -3.390370 | -5.287858 | -2.369466 |
| 1  | -2.236460 | -6.896968 | -1.006335 |
| 1  | -1.448369 | -5.557174 | -0.002203 |
| 6  | -0.345831 | 3.148631  | 3.521425  |
| 1  | 0.022889  | 2.870228  | 4.513584  |
| 1  | 0.518349  | 3.346886  | 2.881538  |
| 6  | -1.300875 | 4.326102  | 3.576202  |
| 1  | -2.164171 | 4.103371  | 4.211652  |
| 1  | -0.786106 | 5.200946  | 3.988785  |
| 1  | -1.664565 | 4.575410  | 2.574413  |
| 17 | -0.022223 | 0.466871  | -2.878359 |

-----  
**B'<sub>IR(CI)</sub>**  
 -----

Number of imaginary frequencies: 0    Electronic energy:    HF=-3161.3256228  
 Zero-point correction=                    0.821722 (Hartree/Particle)  
 Thermal correction to Energy=            0.880696  
 Thermal correction to Enthalpy=         0.881640  
 Thermal correction to Gibbs Free Energy= 0.725671  
 Sum of electronic and zero-point Energies= -3160.503901  
 Sum of electronic and thermal Energies= -3160.444927  
 Sum of electronic and thermal Enthalpies= -3160.443983  
 Sum of electronic and thermal Free Energies= -3160.599952

-----  
 Cartesian Coordinates  
 -----

|   |          |           |           |
|---|----------|-----------|-----------|
| 6 | 3.148348 | -3.698927 | -0.902415 |
| 6 | 1.913320 | -3.020239 | -0.567840 |

|    |           |           |           |
|----|-----------|-----------|-----------|
| 7  | 2.079134  | -1.661381 | -0.692757 |
| 6  | 3.356209  | -1.447651 | -1.145592 |
| 6  | 4.049145  | -2.723533 | -1.274300 |
| 6  | 0.719912  | -3.653810 | -0.226230 |
| 6  | -0.514325 | -3.053688 | 0.001125  |
| 7  | -0.753265 | -1.703086 | -0.006578 |
| 6  | -2.099645 | -1.524441 | 0.173344  |
| 6  | -2.743474 | -2.819900 | 0.336648  |
| 6  | -1.759582 | -3.768552 | 0.233647  |
| 6  | -2.756194 | -0.296826 | 0.177277  |
| 6  | -2.192479 | 0.955510  | -0.051086 |
| 7  | -0.867813 | 1.191527  | -0.305066 |
| 6  | -0.732392 | 2.526701  | -0.574051 |
| 6  | -2.021195 | 3.184269  | -0.440367 |
| 6  | -2.927144 | 2.211712  | -0.106002 |
| 6  | 0.451842  | 3.165464  | -0.929116 |
| 6  | 1.702030  | 2.579558  | -1.103457 |
| 7  | 1.964889  | 1.241419  | -0.979534 |
| 6  | 3.252042  | 1.030631  | -1.402528 |
| 6  | 3.853977  | 2.291608  | -1.780094 |
| 6  | 2.906647  | 3.267345  | -1.562287 |
| 77 | 0.618039  | -0.224383 | -0.445154 |
| 6  | 3.890528  | -0.205480 | -1.471277 |
| 1  | 0.386840  | 4.226918  | -1.133349 |
| 1  | 4.904999  | -0.199364 | -1.854164 |
| 1  | 0.740453  | -4.737980 | -0.195816 |
| 1  | -3.827761 | -0.322922 | 0.335962  |
| 6  | 1.130770  | 0.145869  | 1.865463  |
| 6  | 1.154472  | 1.614731  | 2.256973  |
| 6  | -0.040992 | 2.255384  | 2.609953  |
| 6  | 2.341661  | 2.388458  | 2.268873  |
| 6  | -0.069428 | 3.599437  | 2.984052  |
| 1  | -0.960203 | 1.690270  | 2.593324  |
| 6  | 2.311441  | 3.733937  | 2.648289  |
| 6  | 1.107162  | 4.339805  | 3.006965  |
| 1  | -1.017275 | 4.055844  | 3.252752  |
| 1  | 3.227297  | 4.312153  | 2.661866  |
| 1  | 1.101057  | 5.385657  | 3.301831  |
| 6  | 0.150459  | -0.745552 | 2.637995  |
| 8  | -0.968025 | -0.411050 | 2.952142  |
| 8  | 0.684925  | -1.941896 | 2.926711  |
| 8  | 3.492975  | 1.751990  | 1.906611  |
| 6  | 4.708124  | 2.485563  | 1.847940  |
| 1  | 5.463505  | 1.774842  | 1.508421  |
| 1  | 4.635664  | 3.311454  | 1.131434  |
| 1  | 4.989767  | 2.872335  | 2.835720  |
| 7  | 3.285150  | -1.120875 | 1.867019  |
| 7  | 2.369645  | -0.479743 | 1.922172  |
| 6  | -4.398419 | 2.375805  | 0.153796  |
| 1  | -4.718484 | 1.692824  | 0.950012  |

|   |           |           |           |
|---|-----------|-----------|-----------|
| 1 | -4.603543 | 3.389122  | 0.514249  |
| 6 | -5.281498 | 2.128780  | -1.098586 |
| 1 | -5.179916 | 1.100890  | -1.449637 |
| 1 | -4.958743 | 2.800525  | -1.901748 |
| 6 | -6.727319 | 2.453944  | -0.798107 |
| 8 | -7.152351 | 3.534176  | -0.460497 |
| 8 | -7.562183 | 1.372709  | -0.923134 |
| 1 | -8.458549 | 1.697206  | -0.708618 |
| 6 | -4.226150 | -3.011548 | 0.490080  |
| 1 | -4.630398 | -2.228585 | 1.138076  |
| 1 | -4.433181 | -3.961161 | 0.995057  |
| 6 | -4.979570 | -2.991533 | -0.875620 |
| 1 | -4.343568 | -2.503987 | -1.625593 |
| 1 | -5.184586 | -4.001870 | -1.236238 |
| 6 | -6.286048 | -2.224017 | -0.885367 |
| 8 | -7.326386 | -2.595962 | -1.379940 |
| 8 | -6.141155 | -1.000242 | -0.314666 |
| 1 | -6.946765 | -0.468849 | -0.487446 |
| 6 | -1.892434 | -5.261885 | 0.286084  |
| 1 | -2.904563 | -5.561267 | 0.574885  |
| 1 | -1.681205 | -5.721030 | -0.688637 |
| 1 | -1.198228 | -5.710521 | 1.008201  |
| 6 | -2.251364 | 4.652731  | -0.636356 |
| 1 | -2.050112 | 4.958917  | -1.671146 |
| 1 | -3.284511 | 4.931309  | -0.408235 |
| 1 | -1.596070 | 5.251195  | 0.009178  |
| 6 | 3.366049  | -5.178745 | -0.815600 |
| 1 | 2.780419  | -5.625759 | -0.004709 |
| 1 | 3.081039  | -5.693937 | -1.743387 |
| 1 | 4.421667  | -5.403555 | -0.631486 |
| 6 | 5.256798  | 2.453861  | -2.284600 |
| 1 | 5.998997  | 2.122426  | -1.545871 |
| 1 | 5.426693  | 1.864205  | -3.194380 |
| 1 | 5.478693  | 3.498412  | -2.520080 |
| 6 | 5.442798  | -2.856336 | -1.686404 |
| 6 | 6.000917  | -3.898391 | -2.322338 |
| 1 | 6.087115  | -2.010225 | -1.447063 |
| 1 | 7.059583  | -3.899452 | -2.565452 |
| 1 | 5.428202  | -4.762336 | -2.643926 |
| 6 | 3.087677  | 4.705022  | -1.760031 |
| 6 | 2.566138  | 5.691933  | -1.014462 |
| 1 | 3.743626  | 4.985193  | -2.584635 |
| 1 | 2.769063  | 6.733185  | -1.248641 |
| 1 | 1.946688  | 5.496802  | -0.144001 |
| 6 | -0.187687 | -2.883932 | 3.605052  |
| 1 | -0.540443 | -2.420845 | 4.531345  |
| 1 | -1.052052 | -3.071670 | 2.963128  |
| 6 | 0.623257  | -4.139537 | 3.860286  |
| 1 | 1.491229  | -3.927371 | 4.493017  |
| 1 | -0.000037 | -4.882741 | 4.369443  |

|    |          |           |           |
|----|----------|-----------|-----------|
| 1  | 0.977150 | -4.568488 | 2.917694  |
| 17 | 0.038148 | -0.479077 | -2.755733 |

-----  
**TS(B-C)<sub>Ir(Cl)</sub>**  
 -----

|                                              |                             |                  |
|----------------------------------------------|-----------------------------|------------------|
| Number of imaginary frequencies: 1           | Electronic energy:          | HF=-3161.3184563 |
| Zero-point correction=                       | 0.819821 (Hartree/Particle) |                  |
| Thermal correction to Energy=                | 0.878548                    |                  |
| Thermal correction to Enthalpy=              | 0.879492                    |                  |
| Thermal correction to Gibbs Free Energy=     | 0.724744                    |                  |
| Sum of electronic and zero-point Energies=   | -3160.498635                |                  |
| Sum of electronic and thermal Energies=      | -3160.439909                |                  |
| Sum of electronic and thermal Enthalpies=    | -3160.438964                |                  |
| Sum of electronic and thermal Free Energies= | -3160.593713                |                  |

.....  
 Cartesian Coordinates  
 .....

|    |           |           |           |
|----|-----------|-----------|-----------|
| 6  | 3.062944  | -3.708229 | -0.978624 |
| 6  | 1.858162  | -3.017191 | -0.576757 |
| 7  | 2.044813  | -1.654398 | -0.682414 |
| 6  | 3.305848  | -1.456447 | -1.190873 |
| 6  | 3.963917  | -2.741415 | -1.375122 |
| 6  | 0.667639  | -3.638830 | -0.208149 |
| 6  | -0.558079 | -3.025731 | 0.031130  |
| 7  | -0.780125 | -1.674378 | 0.030074  |
| 6  | -2.128895 | -1.480101 | 0.176093  |
| 6  | -2.791154 | -2.769521 | 0.315367  |
| 6  | -1.815218 | -3.728378 | 0.234678  |
| 6  | -2.772554 | -0.246681 | 0.176714  |
| 6  | -2.191057 | 1.003943  | -0.017059 |
| 7  | -0.861859 | 1.231809  | -0.244058 |
| 6  | -0.706587 | 2.568373  | -0.485694 |
| 6  | -1.989043 | 3.238011  | -0.357002 |
| 6  | -2.911502 | 2.267813  | -0.060200 |
| 6  | 0.486058  | 3.195900  | -0.835401 |
| 6  | 1.721091  | 2.592129  | -1.047568 |
| 7  | 1.968927  | 1.249703  | -0.944604 |
| 6  | 3.231958  | 1.023766  | -1.421939 |
| 6  | 3.838088  | 2.278965  | -1.814887 |
| 6  | 2.917612  | 3.266823  | -1.547184 |
| 77 | 0.622842  | -0.204543 | -0.370170 |
| 6  | 3.847743  | -0.220850 | -1.526293 |
| 1  | 0.435374  | 4.261397  | -1.021827 |
| 1  | 4.842664  | -0.228830 | -1.957390 |
| 1  | 0.676074  | -4.723169 | -0.187514 |
| 1  | -3.847662 | -0.263472 | 0.309962  |
| 6  | 1.008152  | 0.108835  | 1.693692  |
| 6  | 1.311366  | 1.510204  | 2.200545  |
| 6  | 0.262684  | 2.314058  | 2.676298  |
| 6  | 2.605986  | 2.089092  | 2.164957  |

|   |           |           |           |
|---|-----------|-----------|-----------|
| 6 | 0.472605  | 3.623745  | 3.108880  |
| 1 | -0.736273 | 1.904736  | 2.698741  |
| 6 | 2.818390  | 3.395566  | 2.617601  |
| 6 | 1.753366  | 4.164179  | 3.085870  |
| 1 | -0.370110 | 4.208174  | 3.465858  |
| 1 | 3.814577  | 3.820162  | 2.595612  |
| 1 | 1.935936  | 5.178926  | 3.429180  |
| 6 | -0.015503 | -0.628921 | 2.575189  |
| 8 | -1.107461 | -0.173512 | 2.836158  |
| 8 | 0.401145  | -1.832855 | 2.995821  |
| 8 | 3.618114  | 1.307077  | 1.696334  |
| 6 | 4.947385  | 1.805548  | 1.693247  |
| 1 | 5.561892  | 0.996799  | 1.294377  |
| 1 | 5.037057  | 2.684208  | 1.044189  |
| 1 | 5.283997  | 2.057251  | 2.707088  |
| 7 | 3.106595  | -1.614352 | 1.791603  |
| 7 | 2.392081  | -0.800083 | 2.049735  |
| 6 | -4.385754 | 2.442087  | 0.174069  |
| 1 | -4.728153 | 1.746354  | 0.949553  |
| 1 | -4.587490 | 3.449820  | 0.551659  |
| 6 | -5.245483 | 2.230433  | -1.100641 |
| 1 | -5.145662 | 1.209756  | -1.472604 |
| 1 | -4.900892 | 2.916318  | -1.882576 |
| 6 | -6.694289 | 2.561906  | -0.822148 |
| 8 | -7.116034 | 3.636001  | -0.461639 |
| 8 | -7.536840 | 1.493890  | -0.998673 |
| 1 | -8.434651 | 1.821611  | -0.795369 |
| 6 | -4.279757 | -2.945139 | 0.424691  |
| 1 | -4.693367 | -2.165939 | 1.071372  |
| 1 | -4.511888 | -3.898902 | 0.910556  |
| 6 | -4.993707 | -2.897444 | -0.961349 |
| 1 | -4.332465 | -2.404631 | -1.685604 |
| 1 | -5.197550 | -3.900288 | -1.342859 |
| 6 | -6.292509 | -2.117645 | -0.994890 |
| 8 | -7.322423 | -2.472370 | -1.522690 |
| 8 | -6.152129 | -0.904037 | -0.401605 |
| 1 | -6.948115 | -0.362551 | -0.587174 |
| 6 | -1.964557 | -5.220323 | 0.275903  |
| 1 | -2.985045 | -5.510645 | 0.543679  |
| 1 | -1.739767 | -5.676065 | -0.697363 |
| 1 | -1.288836 | -5.679628 | 1.008685  |
| 6 | -2.201894 | 4.711853  | -0.531719 |
| 1 | -2.004312 | 5.029093  | -1.563930 |
| 1 | -3.230010 | 4.999663  | -0.292666 |
| 1 | -1.535358 | 5.294580  | 0.116524  |
| 6 | 3.257978  | -5.192904 | -0.929008 |
| 1 | 2.701912  | -5.644892 | -0.100436 |
| 1 | 2.922447  | -5.684965 | -1.852326 |
| 1 | 4.316672  | -5.438514 | -0.796953 |
| 6 | 5.217695  | 2.423533  | -2.384672 |

|    |           |           |           |
|----|-----------|-----------|-----------|
| 1  | 5.988516  | 2.060867  | -1.691404 |
| 1  | 5.329590  | 1.851248  | -3.314373 |
| 1  | 5.449464  | 3.468554  | -2.608156 |
| 6  | 5.333971  | -2.893234 | -1.855080 |
| 6  | 5.839437  | -3.932785 | -2.537144 |
| 1  | 6.006065  | -2.064928 | -1.630510 |
| 1  | 6.884944  | -3.949369 | -2.831208 |
| 1  | 5.234393  | -4.778439 | -2.847856 |
| 6  | 3.107780  | 4.703577  | -1.743254 |
| 6  | 2.638072  | 5.688138  | -0.961662 |
| 1  | 3.722897  | 4.983271  | -2.598847 |
| 1  | 2.840674  | 6.729635  | -1.194990 |
| 1  | 2.064881  | 5.489846  | -0.060652 |
| 6  | -0.564801 | -2.614906 | 3.746629  |
| 1  | -0.889605 | -2.028420 | 4.611117  |
| 1  | -1.432385 | -2.791289 | 3.105474  |
| 6  | 0.121977  | -3.905641 | 4.149914  |
| 1  | 0.994327  | -3.708285 | 4.781389  |
| 1  | -0.576089 | -4.533645 | 4.714134  |
| 1  | 0.451920  | -4.460768 | 3.266175  |
| 17 | -0.016517 | -0.416085 | -2.726622 |

---

**CIr(Cl)**

---

Number of imaginary frequencies: 0    Electronic energy:    HF=-3161.3663639  
Zero-point correction=                    0.818590 (Hartree/Particle)  
Thermal correction to Energy=            0.879805  
Thermal correction to Enthalpy=         0.880749  
Thermal correction to Gibbs Free Energy= 0.715130  
Sum of electronic and zero-point Energies= -3160.547774  
Sum of electronic and thermal Energies= -3160.486559  
Sum of electronic and thermal Enthalpies= -3160.485615  
Sum of electronic and thermal Free Energies= -3160.651234

.....  
Cartesian Coordinates

.....  

|   |           |           |           |
|---|-----------|-----------|-----------|
| 6 | 3.175986  | -3.129729 | -1.487037 |
| 6 | 1.938990  | -2.590071 | -0.967367 |
| 7 | 1.978587  | -1.219916 | -1.019110 |
| 6 | 3.171110  | -0.856048 | -1.581490 |
| 6 | 3.939634  | -2.052419 | -1.894167 |
| 6 | 0.845913  | -3.352208 | -0.556754 |
| 6 | -0.417747 | -2.883084 | -0.217075 |
| 7 | -0.772518 | -1.563409 | -0.125835 |
| 6 | -2.124158 | -1.511366 | 0.091171  |
| 6 | -2.650090 | -2.866811 | 0.173747  |
| 6 | -1.589695 | -3.716849 | -0.003580 |
| 6 | -2.880686 | -0.349306 | 0.207808  |
| 6 | -2.420729 | 0.961365  | 0.113130  |
| 7 | -1.129663 | 1.330825  | -0.139269 |

|    |           |           |           |
|----|-----------|-----------|-----------|
| 6  | -1.079617 | 2.696900  | -0.176295 |
| 6  | -2.405599 | 3.230860  | 0.079423  |
| 6  | -3.237743 | 2.154779  | 0.259275  |
| 6  | 0.051468  | 3.461216  | -0.449643 |
| 6  | 1.315926  | 2.994193  | -0.800008 |
| 7  | 1.665365  | 1.676729  | -0.906139 |
| 6  | 2.898667  | 1.618247  | -1.500517 |
| 6  | 3.383769  | 2.960170  | -1.743821 |
| 6  | 2.422270  | 3.824083  | -1.270482 |
| 77 | 0.476150  | 0.053827  | -0.437900 |
| 6  | 3.581847  | 0.450613  | -1.826333 |
| 1  | -0.084823 | 4.535328  | -0.470296 |
| 1  | 4.533259  | 0.576653  | -2.330748 |
| 1  | 0.968131  | -4.429003 | -0.591710 |
| 1  | -3.942031 | -0.478660 | 0.381191  |
| 6  | 0.867799  | 0.194808  | 1.442328  |
| 6  | 1.732887  | 1.164793  | 2.140827  |
| 6  | 1.126552  | 2.138781  | 2.959192  |
| 6  | 3.146189  | 1.164641  | 2.025154  |
| 6  | 1.878656  | 3.141564  | 3.566481  |
| 1  | 0.048877  | 2.116103  | 3.075385  |
| 6  | 3.898231  | 2.164425  | 2.652511  |
| 6  | 3.263263  | 3.153996  | 3.404627  |
| 1  | 1.384476  | 3.901740  | 4.163819  |
| 1  | 4.978019  | 2.171455  | 2.565592  |
| 1  | 3.863603  | 3.926172  | 3.877984  |
| 6  | -0.014650 | -0.534115 | 2.423184  |
| 8  | -1.039495 | -0.061119 | 2.873909  |
| 8  | 0.496310  | -1.723863 | 2.763867  |
| 8  | 3.689855  | 0.119515  | 1.353796  |
| 6  | 5.103829  | 0.044591  | 1.241142  |
| 1  | 5.305149  | -0.862627 | 0.671621  |
| 1  | 5.506908  | 0.910292  | 0.701256  |
| 1  | 5.576360  | -0.027978 | 2.228507  |
| 7  | 3.613115  | -3.719716 | 2.091057  |
| 7  | 4.027684  | -2.884142 | 2.683715  |
| 6  | -4.710554 | 2.169218  | 0.557106  |
| 1  | -4.956878 | 1.372405  | 1.269206  |
| 1  | -4.984894 | 3.112112  | 1.040856  |
| 6  | -5.599605 | 2.003449  | -0.704308 |
| 1  | -5.423454 | 1.038360  | -1.181739 |
| 1  | -5.352599 | 2.792546  | -1.423134 |
| 6  | -7.059521 | 2.165763  | -0.345215 |
| 8  | -7.564827 | 3.158352  | 0.124503  |
| 8  | -7.802991 | 1.038071  | -0.584364 |
| 1  | -8.717743 | 1.256044  | -0.318818 |
| 6  | -4.108574 | -3.195118 | 0.329911  |
| 1  | -4.561796 | -2.512645 | 1.054943  |
| 1  | -4.224702 | -4.201524 | 0.745779  |
| 6  | -4.891792 | -3.110816 | -1.016987 |

|    |           |           |           |
|----|-----------|-----------|-----------|
| 1  | -4.309936 | -2.514042 | -1.731035 |
| 1  | -5.032059 | -4.098207 | -1.462085 |
| 6  | -6.250485 | -2.444445 | -0.936163 |
| 8  | -7.273731 | -2.851243 | -1.438507 |
| 8  | -6.180064 | -1.264745 | -0.266841 |
| 1  | -7.028158 | -0.784264 | -0.372436 |
| 6  | -1.588891 | -5.216004 | -0.043283 |
| 1  | -2.562801 | -5.622552 | 0.245414  |
| 1  | -1.361700 | -5.593679 | -1.048806 |
| 1  | -0.839707 | -5.641635 | 0.636407  |
| 6  | -2.742457 | 4.691514  | 0.115518  |
| 1  | -2.638235 | 5.153831  | -0.874743 |
| 1  | -3.771850 | 4.857005  | 0.446683  |
| 1  | -2.083461 | 5.242750  | 0.797768  |
| 6  | 3.524267  | -4.585971 | -1.536308 |
| 1  | 3.081243  | -5.133354 | -0.697893 |
| 1  | 3.173907  | -5.062914 | -2.462111 |
| 1  | 4.609299  | -4.724811 | -1.491352 |
| 6  | 4.706912  | 3.293764  | -2.364528 |
| 1  | 5.546607  | 2.949531  | -1.745673 |
| 1  | 4.818727  | 2.824287  | -3.349883 |
| 1  | 4.824917  | 4.372881  | -2.495412 |
| 6  | 5.271364  | -2.033051 | -2.491349 |
| 6  | 5.831587  | -2.987722 | -3.250929 |
| 1  | 5.861986  | -1.137525 | -2.298459 |
| 1  | 6.841605  | -2.871418 | -3.633125 |
| 1  | 5.304113  | -3.890438 | -3.541106 |
| 6  | 2.497689  | 5.284073  | -1.261082 |
| 6  | 2.020824  | 6.102709  | -0.311196 |
| 1  | 3.026336  | 5.733223  | -2.102065 |
| 1  | 2.132479  | 7.179996  | -0.394411 |
| 1  | 1.533862  | 5.728513  | 0.584698  |
| 6  | -0.295243 | -2.506571 | 3.698352  |
| 1  | -0.478952 | -1.902924 | 4.592024  |
| 1  | -1.259501 | -2.723374 | 3.229558  |
| 6  | 0.483152  | -3.770216 | 4.008341  |
| 1  | 1.443807  | -3.535619 | 4.477329  |
| 1  | -0.092869 | -4.397463 | 4.697628  |
| 1  | 0.674409  | -4.342184 | 3.095046  |
| 17 | -0.255152 | 0.041121  | -2.827355 |

---

**TS(C-P)<sub>Ir(Cl)</sub>**

---

Number of imaginary frequencies: 1    Electronic energy:    HF=-3051.7914464  
Zero-point correction=                    0.809954 (Hartree/Particle)  
Thermal correction to Energy=            0.866073  
Thermal correction to Enthalpy=        0.867017  
Thermal correction to Gibbs Free Energy=    0.716183  
Sum of electronic and zero-point Energies=    -3050.981492  
Sum of electronic and thermal Energies=    -3050.925373



Sum of electronic and thermal Enthalpies= -3050.924429  
Sum of electronic and thermal Free Energies= -3051.075263

.....  
Cartesian Coordinates

.....  
6 3.445351 -3.367911 -1.073446  
6 2.162719 -2.787506 -0.735870  
7 2.241046 -1.416798 -0.805800  
6 3.509056 -1.098732 -1.218475  
6 4.288911 -2.319711 -1.381146  
6 1.012006 -3.508536 -0.425596  
6 -0.253021 -2.998622 -0.151166  
7 -0.581794 -1.669404 -0.110788  
6 -1.925776 -1.586291 0.136837  
6 -2.474779 -2.927261 0.289786  
6 -1.437394 -3.802676 0.110464  
6 -2.662383 -0.406548 0.192832  
6 -2.196246 0.884757 -0.045340  
7 -0.899780 1.215078 -0.334301  
6 -0.862276 2.559012 -0.591339  
6 -2.190667 3.122975 -0.425035  
6 -3.017555 2.086978 -0.071330  
6 0.275483 3.287863 -0.928745  
6 1.568593 2.801363 -1.089697  
7 1.925534 1.481866 -0.993558  
6 3.237210 1.379328 -1.384848  
6 3.755875 2.693704 -1.702317  
6 2.730770 3.588403 -1.494032  
77 0.675009 -0.090540 -0.517277  
6 3.965418 0.192393 -1.474626  
1 0.135328 4.345472 -1.115378  
1 4.986990 0.284912 -1.826342  
1 1.102676 -4.589382 -0.433310  
1 -3.722654 -0.508600 0.392177  
6 -4.489949 2.147524 0.223756  
1 -4.745021 1.435132 1.017385  
1 -4.753225 3.141047 0.601581  
6 -5.381902 1.856850 -1.013750  
1 -5.225152 0.838418 -1.372334  
1 -5.116584 2.552592 -1.816833  
6 -6.837534 2.093444 -0.679722  
8 -7.329027 3.157424 -0.383760  
8 -7.592907 0.949188 -0.712606  
1 -8.502394 1.217486 -0.477005  
6 -3.931344 -3.224138 0.510066  
1 -4.356331 -2.481425 1.191141  
1 -4.045779 -4.192793 1.008096  
6 -4.751289 -3.238928 -0.817029  
1 -4.181274 -2.713808 -1.594253  
1 -4.918402 -4.257090 -1.175243

|   |           |           |           |
|---|-----------|-----------|-----------|
| 6 | -6.097021 | -2.544964 | -0.758256 |
| 8 | -7.135724 | -2.967964 | -1.213546 |
| 8 | -5.995420 | -1.322400 | -0.175656 |
| 1 | -6.836819 | -0.835921 | -0.305410 |
| 6 | -1.464878 | -5.301954 | 0.128770  |
| 1 | -2.443397 | -5.678360 | 0.441765  |
| 1 | -1.253983 | -5.722659 | -0.863209 |
| 1 | -0.717825 | -5.716234 | 0.817971  |
| 6 | -2.534951 | 4.569602  | -0.619748 |
| 1 | -2.420554 | 4.873014  | -1.668567 |
| 1 | -3.569157 | 4.778097  | -0.330165 |
| 1 | -1.886401 | 5.225038  | -0.024936 |
| 6 | 3.759493  | -4.832745 | -1.049517 |
| 1 | 3.172187  | -5.359638 | -0.289813 |
| 1 | 3.549589  | -5.315332 | -2.013998 |
| 1 | 4.819432  | -4.997647 | -0.829429 |
| 6 | 5.160963  | 2.975992  | -2.142094 |
| 1 | 5.893845  | 2.676958  | -1.380890 |
| 1 | 5.412173  | 2.432249  | -3.061746 |
| 1 | 5.311972  | 4.041700  | -2.333947 |
| 6 | 5.696703  | -2.341752 | -1.764960 |
| 6 | 6.343804  | -3.323709 | -2.412360 |
| 1 | 6.272708  | -1.457090 | -1.492840 |
| 1 | 7.404144  | -3.239308 | -2.632100 |
| 1 | 5.844570  | -4.219473 | -2.767063 |
| 6 | 2.806398  | 5.040135  | -1.653641 |
| 6 | 2.191740  | 5.965433  | -0.901255 |
| 1 | 3.460225  | 5.389151  | -2.453067 |
| 1 | 2.320930  | 7.024699  | -1.104184 |
| 1 | 1.568963  | 5.703000  | -0.051131 |
| 6 | 1.219990  | 0.127532  | 1.722387  |
| 6 | 1.221128  | 1.473122  | 2.364092  |
| 6 | 0.573711  | -0.936033 | 2.554923  |
| 6 | 0.106931  | 2.311970  | 2.491726  |
| 6 | 2.378211  | 1.857640  | 3.065418  |
| 8 | -0.479037 | -0.774609 | 3.137453  |
| 8 | 1.296424  | -2.078003 | 2.584243  |
| 6 | 0.201375  | 3.516664  | 3.191432  |
| 1 | -0.830130 | 2.015661  | 2.042476  |
| 6 | 2.505235  | 3.051606  | 3.760624  |
| 8 | 3.364585  | 0.879684  | 3.168566  |
| 6 | 1.396970  | 3.897911  | 3.805478  |
| 1 | -0.670213 | 4.161301  | 3.256627  |
| 1 | 3.434464  | 3.289250  | 4.267254  |
| 6 | 3.406715  | 0.082231  | 2.093326  |
| 1 | 1.462892  | 4.841128  | 4.339896  |
| 1 | 3.723756  | -0.933872 | 2.309298  |
| 1 | 3.753646  | 0.542092  | 1.165505  |
| 1 | 2.117045  | -0.221372 | 1.148467  |
| 6 | 0.717472  | -3.187397 | 3.316880  |

|    |           |           |           |
|----|-----------|-----------|-----------|
| 1  | -0.361670 | -3.190229 | 3.150033  |
| 1  | 1.158171  | -4.071657 | 2.850814  |
| 6  | 1.052594  | -3.107866 | 4.798854  |
| 1  | 0.592528  | -2.224996 | 5.251115  |
| 1  | 0.670200  | -3.996984 | 5.313699  |
| 1  | 2.135990  | -3.062565 | 4.953598  |
| 17 | 0.079970  | -0.305827 | -2.842099 |

-----

N<sub>2</sub>

-----

Number of imaginary frequencies: 0    Electronic energy:    HF=-109.5207179  
Zero-point correction=                    0.005599 (Hartree/Particle)  
Thermal correction to Energy=            0.007960  
Thermal correction to Enthalpy=         0.008904  
Thermal correction to Gibbs Free Energy= -0.012850  
Sum of electronic and zero-point Energies= -109.515119  
Sum of electronic and thermal Energies= -109.512758  
Sum of electronic and thermal Enthalpies= -109.511814  
Sum of electronic and thermal Free Energies= -109.533568

.....

Cartesian Coordinates

.....

|   |          |          |           |
|---|----------|----------|-----------|
| 7 | 0.000000 | 0.000000 | 0.552657  |
| 7 | 0.000000 | 0.000000 | -0.552657 |

-----

Q-A<sub>Ir(Me)</sub>

-----

Number of imaginary frequencies: 7    Electronic energy:    HF=-4752.0971348  
Zero-point correction=                    2.098008 (Hartree/Particle)  
Thermal correction to Energy=            2.224168  
Thermal correction to Enthalpy=         2.225112  
Thermal correction to Gibbs Free Energy= 1.885693  
Sum of electronic and zero-point Energies= -4749.999127  
Sum of electronic and thermal Energies= -4749.872967  
Sum of electronic and thermal Enthalpies= -4749.872023  
Sum of electronic and thermal Free Energies= -4750.211442

.....

Cartesian Coordinates

.....

|   |          |           |           |
|---|----------|-----------|-----------|
| 6 | 3.151403 | 5.228463  | -3.997654 |
| 6 | 3.990290 | 5.444093  | -2.732417 |
| 6 | 5.466412 | 5.012060  | -2.844985 |
| 6 | 6.255845 | 5.459941  | -1.605503 |
| 6 | 5.621290 | 3.498926  | -3.063308 |
| 6 | 4.366490 | -5.858215 | -4.628565 |
| 6 | 5.647028 | -5.118141 | -4.269336 |
| 8 | 6.752776 | -5.646338 | -4.273202 |
| 6 | 4.083932 | -7.105585 | -3.750160 |
| 6 | 5.055631 | -8.260557 | -4.033836 |

|    |           |           |           |
|----|-----------|-----------|-----------|
| 6  | 4.051701  | -6.752011 | -2.255445 |
| 7  | 5.479844  | -3.800339 | -3.906125 |
| 6  | 6.622923  | -2.934762 | -3.639836 |
| 6  | 7.106944  | -2.965243 | -2.177176 |
| 8  | 8.145731  | -2.387437 | -1.866208 |
| 6  | 6.326162  | -1.489182 | -4.054600 |
| 7  | 6.304847  | -3.623026 | -1.302379 |
| 6  | 6.614996  | -3.770246 | 0.107121  |
| 6  | 5.592687  | -3.101775 | 1.039604  |
| 6  | 5.402388  | -1.599983 | 0.893991  |
| 6  | 4.198519  | -1.024715 | 1.333617  |
| 6  | 6.391655  | -0.750920 | 0.377161  |
| 6  | 3.988553  | 0.354982  | 1.273400  |
| 6  | 6.183059  | 0.631190  | 0.312377  |
| 6  | 4.987477  | 1.191291  | 0.763258  |
| 6  | -0.927719 | -3.733838 | -4.409033 |
| 6  | -1.521012 | -4.543342 | -3.271621 |
| 8  | -0.884664 | -4.829846 | -2.250598 |
| 6  | 0.552184  | -4.053773 | -4.642758 |
| 7  | -2.811364 | -4.902390 | -3.453961 |
| 6  | -3.566330 | -5.563878 | -2.413101 |
| 6  | -1.617903 | -7.905760 | 1.915245  |
| 6  | -0.856694 | -7.092502 | 0.868269  |
| 8  | -1.834776 | -6.451696 | 0.048667  |
| 6  | 0.079669  | -7.959384 | 0.021872  |
| 6  | 2.671298  | -4.685533 | 6.500144  |
| 6  | 3.354977  | -3.310060 | 6.552363  |
| 6  | 4.477627  | -3.289858 | 7.599807  |
| 6  | 3.883988  | -2.895885 | 5.170689  |
| 6  | 7.147739  | 1.571371  | 5.629657  |
| 6  | 6.776526  | 0.851672  | 4.337715  |
| 8  | 5.375461  | 0.551523  | 4.411340  |
| 6  | 7.599668  | -0.421171 | 4.128613  |
| 6  | -3.123992 | 1.025949  | 6.166375  |
| 6  | -4.161227 | 1.319758  | 5.067000  |
| 6  | -5.039564 | 0.124199  | 4.760894  |
| 6  | -6.214071 | -0.109533 | 5.490446  |
| 6  | -4.676411 | -0.800968 | 3.771866  |
| 6  | -6.999313 | -1.237689 | 5.247606  |
| 6  | -5.458441 | -1.931015 | 3.523207  |
| 6  | -6.621579 | -2.154993 | 4.264074  |
| 6  | -6.318716 | 0.989128  | -1.409473 |
| 6  | -7.351552 | -0.122230 | -1.335968 |
| 8  | -7.444332 | -0.976048 | -2.219647 |
| 6  | -6.410668 | 1.750019  | -2.736688 |
| 16 | -7.954186 | 2.737878  | -2.948952 |
| 7  | -8.172524 | -0.080025 | -0.254848 |
| 6  | -9.230700 | -1.052934 | -0.037548 |
| 6  | -8.750254 | -2.320409 | 0.686390  |
| 6  | -9.841477 | -3.393632 | 0.870387  |

|   |            |           |           |
|---|------------|-----------|-----------|
| 6 | -9.222637  | -4.702400 | 1.384578  |
| 6 | -10.973489 | -2.931375 | 1.802587  |
| 6 | 0.808111   | 5.273354  | 0.412476  |
| 6 | 0.455655   | 1.048949  | 2.760707  |
| 6 | -2.211833  | -0.745611 | -0.869158 |
| 6 | -1.842930  | 3.477703  | -3.225500 |
| 7 | 0.443128   | 3.013704  | 1.290940  |
| 6 | 0.993116   | 4.272308  | 1.361121  |
| 6 | 1.776475   | 4.401556  | 2.580790  |
| 6 | 1.674945   | 3.207365  | 3.246428  |
| 6 | 0.826457   | 2.348730  | 2.435263  |
| 6 | 2.315398   | 2.806550  | 4.543094  |
| 6 | 2.571212   | 5.615073  | 2.971953  |
| 6 | 3.969524   | 5.678626  | 2.318897  |
| 6 | 4.760770   | 6.923479  | 2.731412  |
| 7 | -0.840439  | 0.476692  | 0.756405  |
| 6 | -0.310848  | 0.176481  | 1.991003  |
| 6 | -0.640783  | -1.187993 | 2.354464  |
| 6 | -1.379724  | -1.706519 | 1.313771  |
| 6 | -1.503289  | -0.646036 | 0.322083  |
| 6 | -0.188940  | -1.879950 | 3.604220  |
| 6 | -1.891701  | -3.063563 | 1.131494  |
| 6 | -2.414476  | -3.853506 | 2.082228  |
| 7 | -1.790485  | 1.491883  | -1.791565 |
| 6 | -2.342338  | 0.230142  | -1.855908 |
| 6 | -3.045986  | 0.064907  | -3.109770 |
| 6 | -2.879339  | 1.237545  | -3.817021 |
| 6 | -2.120557  | 2.138692  | -2.958083 |
| 6 | -3.801789  | -1.160393 | -3.538387 |
| 6 | -3.376692  | 1.496348  | -5.168060 |
| 6 | -2.785080  | 2.227566  | -6.125577 |
| 7 | -0.548283  | 4.047904  | -1.219263 |
| 6 | -1.123899  | 4.360692  | -2.429271 |
| 6 | -0.845926  | 5.747719  | -2.762343 |
| 6 | -0.089745  | 6.258295  | -1.739394 |
| 6 | 0.088113   | 5.181934  | -0.774953 |
| 6 | -1.324999  | 6.434288  | -4.006733 |
| 6 | 0.435327   | 7.657121  | -1.575894 |
| 6 | -0.452607  | 8.553630  | -0.685019 |
| 6 | 0.107780   | 9.970266  | -0.526640 |
| 1 | 7.615679   | -3.356145 | 0.248243  |
| 1 | 6.668743   | -4.837524 | 0.358162  |
| 1 | 4.458504   | -6.174096 | -5.675694 |
| 1 | 3.504475   | -5.180672 | -4.572742 |
| 1 | 1.845783   | -4.694440 | 5.777910  |
| 1 | 3.384486   | -5.464879 | 6.199897  |
| 1 | 2.264314   | -4.967057 | 7.478939  |
| 1 | 8.204000   | 1.861492  | 5.620859  |
| 1 | 6.538582   | 2.472276  | 5.756969  |
| 1 | 6.974162   | 0.917317  | 6.492208  |

|   |            |           |           |
|---|------------|-----------|-----------|
| 1 | 2.128615   | 5.592387  | -3.850831 |
| 1 | 3.581740   | 5.763623  | -4.854036 |
| 1 | 3.083905   | 4.168681  | -4.267778 |
| 1 | -0.923387  | -8.413133 | 2.593999  |
| 1 | -2.269859  | -7.256989 | 2.509089  |
| 1 | -2.242351  | -8.661974 | 1.425407  |
| 1 | -2.506393  | 1.908762  | 6.368586  |
| 1 | -3.614092  | 0.730539  | 7.101078  |
| 1 | -2.459251  | 0.207356  | 5.867096  |
| 1 | -4.520020  | -5.898274 | -2.828534 |
| 1 | -3.021816  | -6.427102 | -2.027056 |
| 1 | -3.766161  | -4.895626 | -1.567296 |
| 1 | -1.032028  | -2.673505 | -4.140272 |
| 1 | -1.506241  | -3.881553 | -5.328945 |
| 1 | -5.323730  | 0.530079  | -1.344378 |
| 1 | -6.410721  | 1.689721  | -0.572159 |
| 1 | -9.629731  | -1.321881 | -1.020937 |
| 1 | -10.027777 | -0.553886 | 0.522930  |
| 1 | -0.541345  | 10.586219 | 0.105894  |
| 1 | 1.104021   | 9.955208  | -0.067053 |
| 1 | 0.200346   | 10.472173 | -1.497836 |
| 1 | 5.746873   | 6.943698  | 2.253941  |
| 1 | 4.233467   | 7.842568  | 2.446348  |
| 1 | 4.914853   | 6.954462  | 3.817136  |
| 1 | 3.524247   | 4.909989  | -1.890867 |
| 1 | 3.960865   | 6.511124  | -2.468123 |
| 1 | 5.896521   | 5.525079  | -3.719858 |
| 1 | 7.315231   | 5.187904  | -1.685719 |
| 1 | 6.197798   | 6.546204  | -1.464867 |
| 1 | 5.859663   | 4.985761  | -0.697179 |
| 1 | 6.679180   | 3.221263  | -3.145063 |
| 1 | 5.194473   | 2.935686  | -2.222428 |
| 1 | 5.121285   | 3.161710  | -3.977677 |
| 1 | 3.075054   | -7.439513 | -4.032334 |
| 1 | 4.792834   | -9.138168 | -3.430968 |
| 1 | 5.017679   | -8.555402 | -5.089493 |
| 1 | 6.085166   | -7.972283 | -3.806500 |
| 1 | 3.739700   | -7.615699 | -1.657611 |
| 1 | 5.047261   | -6.453168 | -1.903026 |
| 1 | 3.346927   | -5.936066 | -2.047913 |
| 1 | 4.575304   | -3.368668 | -4.038586 |
| 1 | 7.463751   | -3.322022 | -4.223622 |
| 1 | 7.193448   | -0.865668 | -3.827272 |
| 1 | 6.115589   | -1.429319 | -5.127555 |
| 1 | 5.467550   | -1.086149 | -3.502737 |
| 1 | 5.492514   | -4.089945 | -1.680985 |
| 1 | 5.900609   | -3.328773 | 2.071623  |
| 1 | 4.618374   | -3.594068 | 0.914043  |
| 1 | 3.411150   | -1.667014 | 1.723181  |
| 1 | 7.320905   | -1.158635 | -0.007893 |

|   |            |           |           |
|---|------------|-----------|-----------|
| 1 | 3.045439   | 0.773087  | 1.612937  |
| 1 | 6.962051   | 1.267797  | -0.098979 |
| 1 | 4.826434   | 2.264873  | 0.714570  |
| 1 | 0.979387   | -3.378877 | -5.391678 |
| 1 | 1.106530   | -3.944720 | -3.706223 |
| 1 | 0.683712   | -5.083119 | -4.994608 |
| 1 | -3.292257  | -4.583155 | -4.281753 |
| 1 | -0.257024  | -6.326901 | 1.388655  |
| 1 | -1.383198  | -5.915446 | -0.633929 |
| 1 | 0.588681   | -7.351401 | -0.736101 |
| 1 | 0.846314   | -8.440661 | 0.641334  |
| 1 | -0.490423  | -8.740537 | -0.494948 |
| 1 | 2.598899   | -2.570642 | 6.857142  |
| 1 | 4.945874   | -2.300392 | 7.661563  |
| 1 | 4.099443   | -3.547315 | 8.596723  |
| 1 | 5.262362   | -4.014691 | 7.344701  |
| 1 | 4.337379   | -1.897510 | 5.190592  |
| 1 | 4.647742   | -3.604525 | 4.820765  |
| 1 | 3.077735   | -2.887753 | 4.425669  |
| 1 | 6.954726   | 1.531631  | 3.489193  |
| 1 | 5.102398   | 0.211314  | 3.542327  |
| 1 | 7.315867   | -0.917607 | 3.193875  |
| 1 | 8.671031   | -0.192846 | 4.073516  |
| 1 | 7.434877   | -1.119273 | 4.957592  |
| 1 | -3.638499  | 1.636915  | 4.155931  |
| 1 | -4.786217  | 2.165824  | 5.380804  |
| 1 | -6.515383  | 0.601419  | 6.257462  |
| 1 | -3.771594  | -0.636586 | 3.190136  |
| 1 | -7.905262  | -1.400367 | 5.826329  |
| 1 | -5.153996  | -2.633732 | 2.752222  |
| 1 | -7.226708  | -3.038619 | 4.078070  |
| 1 | -6.323725  | 1.054426  | -3.573600 |
| 1 | -5.597051  | 2.475376  | -2.811716 |
| 1 | -8.015895  | 0.631653  | 0.443583  |
| 1 | -8.331508  | -2.046602 | 1.665459  |
| 1 | -7.926483  | -2.741589 | 0.096845  |
| 1 | -10.279210 | -3.597660 | -0.119283 |
| 1 | -11.724255 | -3.720751 | 1.926891  |
| 1 | -10.582175 | -2.685823 | 2.798829  |
| 1 | -11.492409 | -2.045207 | 1.420280  |
| 1 | 1.279830   | 6.227794  | 0.619451  |
| 1 | 0.813861   | 0.669221  | 3.711621  |
| 1 | -2.712955  | -1.690187 | -1.050420 |
| 1 | -2.240442  | 3.874350  | -4.151883 |
| 1 | 1.613364   | 2.268116  | 5.191145  |
| 1 | 3.188440   | 2.155229  | 4.397580  |
| 1 | 2.659923   | 3.684920  | 5.098135  |
| 1 | 2.692112   | 5.636575  | 4.062552  |
| 1 | 2.016828   | 6.528537  | 2.715299  |
| 1 | 3.858487   | 5.652931  | 1.226748  |

|    |           |           |           |
|----|-----------|-----------|-----------|
| 1  | 4.528294  | 4.773770  | 2.591790  |
| 1  | -0.214031 | -2.966009 | 3.471528  |
| 1  | 0.832492  | -1.593113 | 3.880128  |
| 1  | -0.832761 | -1.643457 | 4.462770  |
| 1  | -1.817601 | -3.469357 | 0.122323  |
| 1  | -2.723695 | -4.862671 | 1.830104  |
| 1  | -2.556781 | -3.516780 | 3.105417  |
| 1  | -3.857869 | -1.222913 | -4.630058 |
| 1  | -3.324457 | -2.078859 | -3.180663 |
| 1  | -4.833341 | -1.167565 | -3.157935 |
| 1  | -4.317536 | 1.006046  | -5.418249 |
| 1  | -3.248517 | 2.346417  | -7.100703 |
| 1  | -1.820363 | 2.705253  | -5.983286 |
| 1  | -0.934851 | 7.453875  | -4.075221 |
| 1  | -1.010542 | 5.899452  | -4.912047 |
| 1  | -2.420517 | 6.499472  | -4.037546 |
| 1  | 0.535688  | 8.129633  | -2.561271 |
| 1  | 1.450252  | 7.630128  | -1.155515 |
| 1  | -0.565565 | 8.084081  | 0.300748  |
| 1  | -1.460376 | 8.596251  | -1.118242 |
| 1  | -8.766276 | -4.558712 | 2.373062  |
| 1  | -9.980492 | -5.488955 | 1.481680  |
| 1  | -8.441574 | -5.068082 | 0.707780  |
| 77 | -0.741423 | 2.279406  | -0.209110 |
| 6  | -2.488512 | 2.914896  | 0.686722  |
| 1  | -2.248294 | 3.355295  | 1.658765  |
| 1  | -2.964501 | 3.660928  | 0.043827  |
| 1  | -3.150328 | 2.053528  | 0.816852  |
| 1  | -8.785523 | 1.689309  | -3.130020 |

---

**Q-B<sub>Ir(Me)</sub>**

---

-----  
Number of imaginary frequencies: 7    Electronic energy:    HF=-5513.603695  
Zero-point correction=                    2.318349 (Hartree/Particle)  
Thermal correction to Energy=            2.462486  
Thermal correction to Enthalpy=         2.463430  
Thermal correction to Gibbs Free Energy= 2.081834  
Sum of electronic and zero-point Energies= -5511.285346  
Sum of electronic and thermal Energies= -5511.141209  
Sum of electronic and thermal Enthalpies= -5511.140265  
Sum of electronic and thermal Free Energies= -5511.521861

.....  
Cartesian Coordinates

.....

|   |          |          |           |
|---|----------|----------|-----------|
| 6 | 0.798185 | 6.668201 | -1.381094 |
| 6 | 1.982552 | 6.182001 | -0.537268 |
| 6 | 3.365804 | 6.687667 | -0.994073 |
| 6 | 4.445717 | 6.306613 | 0.030325  |
| 6 | 3.746123 | 6.176423 | -2.392178 |



|   |           |           |           |
|---|-----------|-----------|-----------|
| 6 | 5.428838  | -2.493878 | -5.785644 |
| 6 | 6.412018  | -1.469515 | -5.231743 |
| 8 | 7.611068  | -1.501453 | -5.495792 |
| 6 | 5.666293  | -3.939603 | -5.275744 |
| 6 | 6.965031  | -4.552159 | -5.820167 |
| 6 | 5.607905  | -4.015497 | -3.742426 |
| 7 | 5.876025  | -0.500950 | -4.419460 |
| 6 | 6.725353  | 0.536798  | -3.849080 |
| 6 | 7.449215  | 0.121824  | -2.548566 |
| 8 | 8.525834  | 0.619929  | -2.249573 |
| 6 | 5.943162  | 1.836558  | -3.622743 |
| 7 | 6.784198  | -0.776411 | -1.759773 |
| 6 | 7.422886  | -1.415737 | -0.618164 |
| 6 | 7.092050  | -0.811120 | 0.764182  |
| 6 | 7.635666  | 0.579563  | 1.022838  |
| 6 | 6.780286  | 1.684361  | 1.114816  |
| 6 | 9.011657  | 0.786983  | 1.200248  |
| 6 | 7.283847  | 2.962359  | 1.374484  |
| 6 | 9.518664  | 2.059332  | 1.458576  |
| 6 | 8.654470  | 3.154367  | 1.547615  |
| 6 | -0.203551 | -2.500023 | -4.854907 |
| 6 | -0.395221 | -3.743217 | -4.009731 |
| 8 | 0.348406  | -4.027781 | -3.063869 |
| 6 | 1.259047  | -2.304269 | -5.273519 |
| 7 | -1.453730 | -4.504387 | -4.372165 |
| 6 | -1.862714 | -5.662449 | -3.613355 |
| 6 | 1.225231  | -8.463470 | -0.352396 |
| 6 | 1.568757  | -7.136696 | -1.033461 |
| 8 | 0.331661  | -6.473918 | -1.309292 |
| 6 | 2.382418  | -7.330523 | -2.315286 |
| 6 | 4.755783  | -5.639708 | 5.065465  |
| 6 | 4.372328  | -6.908906 | 4.290191  |
| 6 | 3.402723  | -7.779699 | 5.102285  |
| 6 | 3.783857  | -6.560672 | 2.915081  |
| 6 | 6.850724  | 1.691665  | 6.405301  |
| 6 | 6.710434  | 0.646026  | 5.297801  |
| 8 | 5.627711  | -0.256866 | 5.589418  |
| 6 | 8.007329  | -0.120757 | 5.041260  |
| 6 | -2.564511 | -2.473659 | 6.709767  |
| 6 | -3.914678 | -2.329499 | 5.983278  |
| 6 | -4.231100 | -3.519070 | 5.100389  |
| 6 | -4.856079 | -4.657463 | 5.629435  |
| 6 | -3.866301 | -3.530041 | 3.746730  |
| 6 | -5.101111 | -5.778023 | 4.834406  |
| 6 | -4.108122 | -4.648596 | 2.945704  |
| 6 | -4.723661 | -5.778604 | 3.489398  |
| 6 | -6.437907 | -1.146219 | -0.420109 |
| 6 | -7.052085 | -2.498463 | -0.739743 |
| 8 | -7.011820 | -2.976508 | -1.874770 |
| 6 | -7.015611 | -0.048567 | -1.321973 |

|    |           |           |           |
|----|-----------|-----------|-----------|
| 16 | -8.800991 | 0.319266  | -1.037023 |
| 7  | -7.676511 | -3.111018 | 0.300205  |
| 6  | -8.358506 | -4.387238 | 0.162260  |
| 6  | -7.431397 | -5.595028 | 0.369919  |
| 6  | -8.116436 | -6.960871 | 0.166622  |
| 6  | -7.071702 | -8.087335 | 0.165366  |
| 6  | -9.204589 | -7.238247 | 1.216861  |
| 6  | -2.540313 | 5.575518  | 1.108537  |
| 6  | -0.951362 | 1.295367  | 2.737229  |
| 6  | -2.563014 | -0.844215 | -1.299012 |
| 6  | -4.201715 | 3.428798  | -2.908439 |
| 7  | -1.857813 | 3.272257  | 1.599991  |
| 6  | -1.952649 | 4.606970  | 1.916978  |
| 6  | -1.364980 | 4.845417  | 3.227059  |
| 6  | -0.929633 | 3.631044  | 3.689039  |
| 6  | -1.243804 | 2.651758  | 2.663545  |
| 6  | -0.252807 | 3.309417  | 4.987594  |
| 6  | -1.250532 | 6.189261  | 3.890342  |
| 6  | -0.034404 | 7.016763  | 3.419573  |
| 6  | 0.052058  | 8.384687  | 4.103254  |
| 7  | -1.851591 | 0.564493  | 0.576862  |
| 6  | -1.206155 | 0.327265  | 1.769822  |
| 6  | -0.816731 | -1.066902 | 1.854884  |
| 6  | -1.243164 | -1.670991 | 0.691587  |
| 6  | -1.911456 | -0.636559 | -0.088644 |
| 6  | -0.031802 | -1.677968 | 2.974297  |
| 6  | -1.006888 | -3.031581 | 0.212731  |
| 6  | -0.902165 | -4.145646 | 0.955991  |
| 7  | -3.236016 | 1.463414  | -1.810804 |
| 6  | -3.191589 | 0.114656  | -2.091817 |
| 6  | -3.858800 | -0.148821 | -3.347818 |
| 6  | -4.257723 | 1.071232  | -3.851237 |
| 6  | -3.885801 | 2.073548  | -2.858552 |
| 6  | -4.083374 | -1.510303 | -3.938015 |
| 6  | -4.935229 | 1.287353  | -5.129921 |
| 6  | -4.779170 | 2.324188  | -5.967366 |
| 7  | -3.215823 | 4.174985  | -0.785829 |
| 6  | -3.887431 | 4.400836  | -1.965023 |
| 6  | -4.222994 | 5.809849  | -2.077504 |
| 6  | -3.747438 | 6.423612  | -0.948444 |
| 6  | -3.127536 | 5.384869  | -0.139002 |
| 6  | -4.953052 | 6.419312  | -3.236926 |
| 6  | -3.860275 | 7.870376  | -0.557211 |
| 6  | -5.061791 | 8.173210  | 0.364984  |
| 6  | -5.149841 | 9.651480  | 0.756107  |
| 1  | 8.504017  | -1.371244 | -0.783655 |
| 1  | 7.123483  | -2.469770 | -0.615610 |
| 1  | 5.534942  | -2.477776 | -6.877333 |
| 1  | 4.397874  | -2.199129 | -5.552602 |
| 1  | 5.475539  | -5.030803 | 4.504591  |

|   |           |           |           |
|---|-----------|-----------|-----------|
| 1 | 3.870130  | -5.019857 | 5.260651  |
| 1 | 5.208113  | -5.884234 | 6.034304  |
| 1 | 7.610295  | 2.438487  | 6.147723  |
| 1 | 5.898753  | 2.206836  | 6.569851  |
| 1 | 7.153719  | 1.220209  | 7.350631  |
| 1 | -0.151671 | 6.322418  | -0.958146 |
| 1 | 0.767447  | 7.764739  | -1.421528 |
| 1 | 0.850118  | 6.302237  | -2.412788 |
| 1 | 2.137434  | -9.001663 | -0.071677 |
| 1 | 0.631030  | -8.287147 | 0.550194  |
| 1 | 0.640180  | -9.097018 | -1.029208 |
| 1 | -2.364639 | -1.601868 | 7.343858  |
| 1 | -2.553889 | -3.366539 | 7.345113  |
| 1 | -1.741425 | -2.568679 | 5.992175  |
| 1 | -2.440384 | -6.329607 | -4.259364 |
| 1 | -0.991146 | -6.197862 | -3.236618 |
| 1 | -2.484115 | -5.388235 | -2.750877 |
| 1 | -0.529815 | -1.643628 | -4.248296 |
| 1 | -0.855848 | -2.525951 | -5.736223 |
| 1 | -5.359588 | -1.213395 | -0.611592 |
| 1 | -6.571993 | -0.873473 | 0.632443  |
| 1 | -8.782200 | -4.419994 | -0.846686 |
| 1 | -9.188715 | -4.397778 | 0.875955  |
| 1 | -6.011243 | 9.840130  | 1.406701  |
| 1 | -4.249362 | 9.975758  | 1.292798  |
| 1 | -5.254234 | 10.291371 | -0.128960 |
| 1 | 0.924006  | 8.949698  | 3.754876  |
| 1 | -0.840365 | 8.989066  | 3.897983  |
| 1 | 0.135855  | 8.280171  | 5.192167  |
| 1 | 1.993419  | 5.080949  | -0.522661 |
| 1 | 1.823966  | 6.494576  | 0.504734  |
| 1 | 3.317761  | 7.787254  | -1.038968 |
| 1 | 5.429971  | 6.688130  | -0.266182 |
| 1 | 4.213860  | 6.710299  | 1.023608  |
| 1 | 4.528806  | 5.215440  | 0.124499  |
| 1 | 4.731429  | 6.551640  | -2.692934 |
| 1 | 3.794020  | 5.078850  | -2.405521 |
| 1 | 3.026354  | 6.490320  | -3.155910 |
| 1 | 4.826377  | -4.531521 | -5.668473 |
| 1 | 7.077129  | -5.586237 | -5.471440 |
| 1 | 6.964723  | -4.565036 | -6.916859 |
| 1 | 7.836278  | -3.975374 | -5.498300 |
| 1 | 5.656099  | -5.056238 | -3.401509 |
| 1 | 6.454519  | -3.482425 | -3.291692 |
| 1 | 4.680830  | -3.578448 | -3.351020 |
| 1 | 4.890231  | -0.520539 | -4.180293 |
| 1 | 7.534690  | 0.712796  | -4.561087 |
| 1 | 6.610086  | 2.595772  | -3.204635 |
| 1 | 5.533726  | 2.208237  | -4.568414 |
| 1 | 5.117294  | 1.686609  | -2.917385 |

|   |            |           |           |
|---|------------|-----------|-----------|
| 1 | 5.973325   | -1.226314 | -2.162402 |
| 1 | 7.508809   | -1.505170 | 1.509155  |
| 1 | 6.007462   | -0.819232 | 0.913593  |
| 1 | 5.710553   | 1.546387  | 0.984064  |
| 1 | 9.694232   | -0.057107 | 1.129095  |
| 1 | 6.600402   | 3.805358  | 1.441574  |
| 1 | 10.589288  | 2.197994  | 1.586176  |
| 1 | 9.048678   | 4.147362  | 1.748113  |
| 1 | 1.371678   | -1.382850 | -5.855001 |
| 1 | 1.900993   | -2.238499 | -4.392240 |
| 1 | 1.604280   | -3.138962 | -5.894193 |
| 1 | -2.052308  | -4.174426 | -5.114595 |
| 1 | 2.160521   | -6.526116 | -0.330779 |
| 1 | 0.509644   | -5.641502 | -1.792041 |
| 1 | 2.585906   | -6.365286 | -2.794349 |
| 1 | 3.344577   | -7.813030 | -2.105166 |
| 1 | 1.829295   | -7.955827 | -3.026512 |
| 1 | 5.291215   | -7.491395 | 4.125467  |
| 1 | 3.153212   | -8.703790 | 4.567363  |
| 1 | 3.832184   | -8.058475 | 6.072183  |
| 1 | 2.463822   | -7.243844 | 5.295093  |
| 1 | 3.536654   | -7.464510 | 2.345453  |
| 1 | 2.860799   | -5.975084 | 3.020641  |
| 1 | 4.487950   | -5.970734 | 2.315395  |
| 1 | 6.399020   | 1.138084  | 4.370661  |
| 1 | 5.860436   | -0.735346 | 6.402252  |
| 1 | 7.855457   | -0.878060 | 4.265803  |
| 1 | 8.802912   | 0.553522  | 4.706392  |
| 1 | 8.351400   | -0.625003 | 5.955403  |
| 1 | -3.902433  | -1.414079 | 5.378385  |
| 1 | -4.710009  | -2.200996 | 6.728827  |
| 1 | -5.153572  | -4.664340 | 6.676333  |
| 1 | -3.388348  | -2.653943 | 3.312405  |
| 1 | -5.586187  | -6.650461 | 5.265137  |
| 1 | -3.807227  | -4.636314 | 1.901765  |
| 1 | -4.904997  | -6.652890 | 2.869795  |
| 1 | -6.872524  | -0.310457 | -2.371579 |
| 1 | -6.500873  | 0.896794  | -1.136947 |
| 1 | -7.653081  | -2.667684 | 1.206578  |
| 1 | -6.990648  | -5.548743 | 1.376220  |
| 1 | -6.603038  | -5.497739 | -0.342900 |
| 1 | -8.596365  | -6.949409 | -0.824409 |
| 1 | -9.660787  | -8.222297 | 1.056274  |
| 1 | -8.779673  | -7.230751 | 2.229443  |
| 1 | -10.010664 | -6.496560 | 1.187651  |
| 1 | -2.547938  | 6.588577  | 1.495973  |
| 1 | -0.450806  | 0.960174  | 3.638697  |
| 1 | -2.588306  | -1.866000 | -1.662152 |
| 1 | -4.769631  | 3.757597  | -3.770115 |
| 1 | -0.822435  | 2.573418  | 5.569957  |

|   |           |           |           |
|---|-----------|-----------|-----------|
| 1 | 0.746026  | 2.885195  | 4.824194  |
| 1 | -0.136018 | 4.201541  | 5.609779  |
| 1 | -1.185893 | 6.057055  | 4.977884  |
| 1 | -2.165543 | 6.772637  | 3.717251  |
| 1 | -0.086028 | 7.145982  | 2.330540  |
| 1 | 0.881061  | 6.442726  | 3.614511  |
| 1 | 0.592199  | -2.494912 | 2.596893  |
| 1 | 0.623398  | -0.942865 | 3.452412  |
| 1 | -0.681379 | -2.099578 | 3.753918  |
| 1 | -0.864806 | -3.134461 | -0.863039 |
| 1 | -0.667647 | -5.096582 | 0.484181  |
| 1 | -1.056748 | -4.144739 | 2.031225  |
| 1 | -4.357397 | -1.442447 | -4.995081 |
| 1 | -3.186530 | -2.137667 | -3.869715 |
| 1 | -4.891117 | -2.043947 | -3.416821 |
| 1 | -5.615073 | 0.491640  | -5.434687 |
| 1 | -5.335411 | 2.375804  | -6.898862 |
| 1 | -4.083219 | 3.134364  | -5.770963 |
| 1 | -5.020297 | 7.506703  | -3.138604 |
| 1 | -4.452951 | 6.204410  | -4.189983 |
| 1 | -5.977762 | 6.033664  | -3.319068 |
| 1 | -3.944997 | 8.489211  | -1.459703 |
| 1 | -2.937180 | 8.197920  | -0.059237 |
| 1 | -4.990243 | 7.551570  | 1.266969  |
| 1 | -5.984804 | 7.865017  | -0.142947 |
| 1 | -6.556950 | -8.145538 | 1.133756  |
| 1 | -7.538587 | -9.062175 | -0.019544 |
| 1 | -6.310765 | -7.925838 | -0.607114 |
| 6 | 3.096281  | -0.414530 | -0.455717 |
| 6 | 3.036275  | 0.408905  | 0.773477  |
| 6 | 2.798541  | 1.792673  | 0.707539  |
| 6 | 3.289537  | -0.149664 | 2.055490  |
| 6 | 2.814379  | 2.594659  | 1.848789  |
| 1 | 2.599991  | 2.246749  | -0.252610 |
| 6 | 3.330808  | 0.658084  | 3.195857  |
| 6 | 3.094204  | 2.030224  | 3.090294  |
| 1 | 2.620730  | 3.658624  | 1.753932  |
| 1 | 3.586046  | 0.229496  | 4.157951  |
| 1 | 3.142942  | 2.649661  | 3.981651  |
| 6 | 2.773621  | -0.049439 | -1.848526 |
| 8 | 3.202987  | -0.670889 | -2.818414 |
| 8 | 1.958669  | 1.010330  | -1.956718 |
| 6 | 1.597476  | 1.409835  | -3.304592 |
| 1 | 2.508509  | 1.700350  | -3.837573 |
| 1 | 1.167527  | 0.545293  | -3.817421 |
| 6 | 0.609581  | 2.554902  | -3.192648 |
| 1 | -0.294408 | 2.244562  | -2.659076 |
| 1 | 1.050037  | 3.408740  | -2.667800 |
| 1 | 0.318520  | 2.883798  | -4.196376 |
| 8 | 3.507694  | -1.495428 | 2.086512  |

|    |           |           |           |
|----|-----------|-----------|-----------|
| 6  | 3.792238  | -2.127652 | 3.332697  |
| 1  | 4.673475  | -1.694322 | 3.816857  |
| 1  | 2.934615  | -2.051546 | 4.012615  |
| 1  | 3.969403  | -3.176889 | 3.091440  |
| 77 | -2.595669 | 2.359348  | -0.073895 |
| 6  | -4.425067 | 2.050237  | 0.826318  |
| 1  | -4.420278 | 2.522037  | 1.813096  |
| 1  | -5.205182 | 2.499254  | 0.204535  |
| 1  | -4.590475 | 0.974043  | 0.927504  |
| 1  | -9.285358 | -0.813466 | -1.589987 |
| 7  | 3.639719  | -1.622414 | -0.448107 |
| 7  | 4.076710  | -2.664074 | -0.557486 |

-----  
**Q-TS(B-C)<sub>Ir(Me)</sub>**  
 -----

-----  
 Number of imaginary frequencies: 10    Electronic energy:    HF=-5513.55220876  
 Zero-point correction=                    2.315434 (Hartree/Particle)  
 Thermal correction to Energy=            2.456897  
 Thermal correction to Enthalpy=         2.457841  
 Thermal correction to Gibbs Free Energy= 2.089027  
 Sum of electronic and zero-point Energies= -5511.236775  
 Sum of electronic and thermal Energies= -5511.095312  
 Sum of electronic and thermal Enthalpies= -5511.094368  
 Sum of electronic and thermal Free Energies= -5511.463182  
 -----

Cartesian Coordinates  
 -----

|   |           |           |           |
|---|-----------|-----------|-----------|
| 6 | 0.387948  | -5.534413 | -1.977818 |
| 6 | -0.160317 | -5.930150 | -0.785408 |
| 6 | -0.107579 | -4.773616 | 0.099157  |
| 6 | 0.611756  | -6.346433 | -3.219267 |
| 6 | -0.666090 | -7.291542 | -0.398223 |
| 6 | 0.384818  | -8.165799 | 0.320779  |
| 6 | -0.159426 | -9.542238 | 0.714843  |
| 8 | -7.055188 | 4.354059  | 0.284490  |
| 8 | -5.570589 | 5.309157  | 0.456868  |
| 8 | -3.964231 | 6.650108  | -5.684873 |
| 8 | -2.996278 | 5.502461  | -4.756645 |
| 8 | -1.175814 | 4.098838  | 5.828413  |
| 8 | -1.594568 | 5.817676  | 5.741403  |
| 8 | -1.119427 | 5.100109  | 7.289611  |
| 8 | -7.709892 | -1.251698 | 5.593095  |
| 8 | -6.070685 | -1.564244 | 4.986228  |
| 8 | -6.326108 | -1.235595 | 6.712023  |
| 8 | -2.576622 | -5.127236 | -3.422465 |
| 8 | -2.966071 | -4.534955 | -5.046179 |
| 8 | -3.966655 | -4.061866 | -3.664129 |
| 8 | 2.015679  | 8.344811  | 2.318995  |
| 8 | 3.258414  | 7.091747  | 2.115858  |

|   |           |            |           |
|---|-----------|------------|-----------|
| 8 | 3.287213  | 8.541219   | 1.089727  |
| 8 | 2.905113  | -2.019979  | 5.911030  |
| 8 | 4.131777  | -1.020939  | 6.718444  |
| 8 | 3.104949  | -0.315819  | 5.459676  |
| 8 | 5.167794  | 5.556901   | -3.274917 |
| 8 | 3.752078  | 6.279873   | -2.476126 |
| 8 | 4.335424  | 4.697588   | -1.958483 |
| 8 | 1.296968  | 2.686375   | -4.367120 |
| 8 | 1.918228  | 3.746591   | -5.628021 |
| 8 | 5.526088  | -0.892710  | -1.744155 |
| 8 | 6.610385  | -2.170775  | -1.187930 |
| 8 | 9.930748  | 0.705320   | -1.719412 |
| 8 | 10.405352 | -0.166201  | -0.253908 |
| 8 | 0.605576  | -10.143278 | 1.219344  |
| 8 | -1.015009 | -9.451839  | 1.395975  |
| 8 | -0.497067 | -10.103443 | -0.165473 |
| 8 | -4.328977 | -6.513262  | 5.052399  |
| 8 | -2.816665 | -7.340928  | 4.649019  |
| 8 | -2.956134 | -6.445335  | 6.168483  |
| 8 | -4.718225 | -6.455994  | -3.387303 |
| 8 | -3.651113 | -6.950008  | -4.691163 |
| 8 | -4.973067 | -5.556587  | -6.297336 |
| 8 | -6.909918 | -7.132144  | -6.416487 |
| 8 | -5.411792 | -8.001087  | -6.038784 |
| 8 | -6.590256 | -7.666193  | -4.759062 |
| 8 | -7.249967 | -4.750581  | -5.634145 |
| 8 | -6.915540 | -5.176772  | -3.948697 |
| 8 | -5.992955 | -3.888231  | -4.740110 |
| 8 | -2.294974 | 7.679031   | -4.150759 |
| 8 | -3.765421 | 9.470873   | -3.243473 |
| 8 | -4.237913 | 9.025659   | -4.892824 |
| 8 | -5.195560 | 8.447501   | -3.524337 |
| 8 | -2.661409 | 7.747422   | -1.705336 |
| 8 | -4.084183 | 6.709211   | -1.858194 |
| 8 | -2.463862 | 6.073139   | -2.239649 |
| 8 | -4.176024 | 3.763660   | -4.159529 |
| 8 | -7.044039 | 3.903132   | -4.181136 |
| 8 | -6.905328 | 1.470191   | -3.595130 |
| 8 | -5.827736 | 1.867071   | -4.954464 |
| 8 | -5.162019 | 1.617314   | -3.318787 |
| 8 | -4.821027 | 4.384571   | -1.640177 |
| 8 | -5.496741 | 3.548905   | 2.102943  |
| 8 | -4.271197 | 3.196418   | 0.887621  |
| 8 | -4.383212 | 1.146086   | -0.442619 |
| 8 | -7.698452 | 2.267823   | 2.057971  |
| 8 | -5.435494 | -1.050487  | -0.849498 |
| 8 | -8.752172 | 0.067905   | 1.651020  |
| 8 | -7.626932 | -1.602883  | 0.185969  |
| 8 | -0.612549 | 3.567950   | -5.664662 |
| 8 | -0.654991 | 4.245588   | -4.017265 |

|   |           |           |           |
|---|-----------|-----------|-----------|
| 8 | -0.097588 | 5.240660  | -5.371755 |
| 8 | 3.778302  | 4.310515  | -4.641620 |
| 8 | 1.136617  | 6.358363  | 1.072608  |
| 8 | 2.104718  | 5.971436  | -1.032639 |
| 8 | 0.233099  | 7.544661  | -0.940943 |
| 8 | 0.140449  | 8.577950  | 0.498967  |
| 8 | 1.421201  | 8.843387  | -0.708357 |
| 8 | -3.169816 | 3.676133  | 7.277435  |
| 8 | -4.867151 | 5.464456  | 7.677525  |
| 8 | -3.303428 | 5.914080  | 8.379391  |
| 8 | -3.832075 | 6.644010  | 6.854627  |
| 8 | -4.957120 | 4.024383  | 5.561614  |
| 8 | -3.909617 | 5.144264  | 4.683467  |
| 8 | -3.447967 | 3.442354  | 4.807828  |
| 8 | -6.785651 | 0.745373  | 4.420401  |
| 8 | -4.909206 | 1.712963  | 5.418211  |
| 8 | -7.098833 | 2.448171  | 6.232714  |
| 8 | -8.334371 | 1.186592  | 6.341619  |
| 8 | -6.948348 | 1.171529  | 7.458426  |
| 8 | 4.139754  | -1.845781 | 3.749948  |
| 8 | 5.156687  | -2.563069 | 4.994549  |
| 8 | 7.057685  | -1.287819 | 5.972267  |
| 8 | 4.628530  | 0.412397  | 2.862515  |
| 8 | 8.739317  | 0.497039  | 5.639974  |
| 8 | 6.305681  | 2.193324  | 2.520305  |
| 8 | 8.369255  | 2.256491  | 3.917596  |
| 8 | 6.234308  | -1.294509 | -4.104706 |
| 8 | 5.508676  | -2.731768 | -3.368811 |
| 8 | 8.310123  | -1.218228 | -0.214501 |
| 8 | 8.890361  | 1.347999  | 1.097521  |
| 8 | 8.405239  | 2.149911  | -0.395615 |
| 8 | 10.779777 | 2.891694  | -0.754417 |
| 8 | 12.381321 | 2.823140  | 1.175597  |
| 8 | 11.252264 | 1.799828  | 2.078072  |
| 8 | 12.018291 | 1.193814  | 0.599906  |
| 8 | -0.868457 | -5.706967 | 1.834229  |
| 8 | 0.637494  | -0.061265 | 4.373245  |
| 8 | 3.036555  | 1.824128  | -1.216848 |
| 8 | 1.678592  | -3.895867 | -3.704627 |
| 8 | 0.481676  | -1.758019 | 6.135211  |
| 8 | -1.209939 | -1.345992 | 5.851941  |
| 8 | -0.778370 | -2.969547 | 6.393393  |
| 8 | -0.890994 | -5.010680 | 5.531747  |
| 8 | -0.736418 | -5.936721 | 4.056094  |
| 8 | -3.046478 | -5.170367 | 3.357712  |
| 8 | -3.188154 | -4.285263 | 4.865012  |
| 8 | 1.898762  | 3.452575  | 3.713748  |
| 8 | 0.863882  | 2.211051  | 4.444214  |
| 8 | 2.623007  | 2.077741  | 4.550088  |
| 8 | 2.640104  | 3.743141  | 0.056730  |



|    |           |           |           |
|----|-----------|-----------|-----------|
| 8  | 4.151426  | 4.981663  | 1.420015  |
| 8  | 4.143264  | 3.667292  | 2.734880  |
| 8  | 3.774441  | 0.940024  | -4.810636 |
| 8  | 3.484185  | 1.958948  | -3.398864 |
| 8  | 4.865780  | 0.869002  | -3.423186 |
| 8  | 3.926440  | -1.340368 | -5.404200 |
| 8  | 2.718618  | -2.815077 | -6.848097 |
| 8  | 1.360785  | -3.015529 | -5.613154 |
| 8  | 0.169291  | -7.342960 | -3.128157 |
| 8  | 0.171054  | -5.869487 | -4.104002 |
| 8  | 1.681265  | -6.482014 | -3.428034 |
| 8  | -1.010590 | -7.823615 | -1.294615 |
| 8  | -1.550293 | -7.192671 | 0.246471  |
| 8  | 0.744692  | -7.636531 | 1.212493  |
| 8  | 1.257455  | -8.282197 | -0.334945 |
| 8  | 9.518959  | 3.788011  | 1.897152  |
| 8  | 10.713114 | 4.702234  | 0.962698  |
| 8  | 9.098139  | 4.408012  | 0.292059  |
| 6  | -1.284142 | -1.188729 | -0.396691 |
| 6  | -2.431800 | -2.037798 | 0.065831  |
| 6  | -2.900477 | -3.061546 | -0.779210 |
| 6  | -3.050537 | -1.912225 | 1.337687  |
| 6  | -3.913373 | -3.937393 | -0.390652 |
| 8  | -2.433314 | -3.194425 | -1.745539 |
| 6  | -4.094923 | -2.767058 | 1.707324  |
| 6  | -4.518657 | -3.783845 | 0.853687  |
| 8  | -4.226347 | -4.727025 | -1.067122 |
| 8  | -4.574237 | -2.640565 | 2.670361  |
| 8  | -5.322584 | -4.445132 | 1.165533  |
| 6  | -1.560702 | -0.653694 | -1.800585 |
| 8  | -2.046389 | 0.434294  | -2.058679 |
| 8  | -1.232126 | -1.551056 | -2.741749 |
| 6  | -1.668967 | -1.249057 | -4.096431 |
| 8  | -1.632481 | -2.220314 | -4.594322 |
| 8  | -2.706790 | -0.906936 | -4.050602 |
| 6  | -0.788547 | -0.229276 | -4.802154 |
| 8  | -0.850736 | 0.741075  | -4.304389 |
| 8  | 0.254132  | -0.554679 | -4.825328 |
| 8  | -1.136587 | -0.115382 | -5.836377 |
| 8  | -2.606477 | -0.913093 | 2.139920  |
| 6  | -3.383654 | -0.515988 | 3.266797  |
| 8  | -4.407414 | -0.266746 | 2.972035  |
| 8  | -3.394010 | -1.292178 | 4.039119  |
| 8  | -2.891141 | 0.370425  | 3.666471  |
| 7  | -1.548500 | 0.451772  | 0.397034  |
| 7  | -1.077365 | 1.375817  | 0.797926  |
| 77 | 0.821901  | -1.834659 | 0.223763  |
| 6  | 2.714782  | -2.637950 | 0.694629  |
| 8  | 2.639856  | -3.293547 | 1.569433  |
| 8  | 3.097718  | -3.219744 | -0.150588 |

8 3.418593 -1.826380 0.913124  
8 8.681664 -2.088827 -3.997064

-----  
**Q-C<sub>Ir(Me)</sub>**  
-----

-----  
Number of imaginary frequencies: 7    Electronic energy:    HF=-5513.5999187  
Zero-point correction=                    2.313692 (Hartree/Particle)  
Thermal correction to Energy=            2.459170  
Thermal correction to Enthalpy=         2.460114  
Thermal correction to Gibbs Free Energy= 2.075899  
Sum of electronic and zero-point Energies= -5511.286226  
Sum of electronic and thermal Energies= -5511.140749  
Sum of electronic and thermal Enthalpies= -5511.139805  
Sum of electronic and thermal Free Energies= -5511.524020  
-----

.....  
Cartesian Coordinates  
-----

6 -0.156739 -5.015137 -4.507374  
6 1.080214 -4.695044 -5.354803  
6 1.393306 -5.714142 -6.469056  
6 2.527645 -5.201067 -7.369016  
6 1.735852 -7.105125 -5.913381  
6 -7.409553 3.466153 -4.003996  
6 -8.034795 2.092810 -3.805072  
8 -9.244593 1.898121 -3.839964  
6 -7.858907 4.527015 -2.964657  
6 -9.326384 4.943459 -3.142577  
6 -7.575721 4.068632 -1.525822  
7 -7.147867 1.069683 -3.563687  
6 -7.604082 -0.306781 -3.418374  
6 -8.052041 -0.672201 -1.987588  
8 -8.688151 -1.699796 -1.786302  
6 -6.531429 -1.296168 -3.887678  
7 -7.659073 0.188567 -1.008049  
6 -7.961551 -0.026420 0.393708  
6 -6.761979 -0.559018 1.208935  
6 -6.240127 -1.895444 0.718471  
6 -4.975172 -2.008278 0.124923  
6 -7.032537 -3.051679 0.820704  
6 -4.518254 -3.236214 -0.364157  
6 -6.578239 -4.279827 0.336919  
6 -5.318717 -4.374921 -0.260786  
6 -1.832967 4.671572 -3.808536  
6 -1.748702 5.535301 -2.568906  
8 -2.445427 5.318894 -1.569053  
6 -3.271766 4.577704 -4.336806  
7 -0.865886 6.552733 -2.647530  
6 -0.623930 7.435938 -1.530034  
6 -3.428810 7.790195 2.944611

|    |           |           |           |
|----|-----------|-----------|-----------|
| 6  | -3.664564 | 6.824596  | 1.782735  |
| 8  | -2.528401 | 6.924580  | 0.922234  |
| 6  | -4.954678 | 7.132103  | 1.017682  |
| 6  | -5.035687 | 2.239899  | 6.994147  |
| 6  | -4.650463 | 0.839475  | 6.489467  |
| 6  | -4.232517 | -0.070295 | 7.653964  |
| 6  | -5.788756 | 0.203945  | 5.675697  |
| 6  | -5.244486 | -5.310929 | 5.293446  |
| 6  | -6.089282 | -4.615407 | 4.231754  |
| 8  | -5.364446 | -3.448732 | 3.822147  |
| 6  | -7.480565 | -4.237879 | 4.746164  |
| 6  | 2.955391  | 0.844428  | 6.278157  |
| 6  | 4.087068  | 0.981789  | 5.241323  |
| 6  | 4.200298  | 2.380623  | 4.668514  |
| 6  | 5.081872  | 3.319229  | 5.223415  |
| 6  | 3.401018  | 2.778903  | 3.587077  |
| 6  | 5.160912  | 4.619044  | 4.720194  |
| 6  | 3.470739  | 4.079220  | 3.081575  |
| 6  | 4.351535  | 5.005733  | 3.648541  |
| 6  | 5.362333  | 3.495931  | -1.122962 |
| 6  | 5.987297  | 4.881307  | -0.991527 |
| 8  | 6.342813  | 5.542555  | -1.967477 |
| 6  | 5.582816  | 2.880053  | -2.503674 |
| 16 | 7.334496  | 2.449384  | -2.880464 |
| 7  | 6.116936  | 5.336223  | 0.284285  |
| 6  | 6.660599  | 6.655873  | 0.568482  |
| 6  | 5.620041  | 7.781403  | 0.451931  |
| 6  | 6.187254  | 9.197744  | 0.669725  |
| 6  | 5.133543  | 10.256804 | 0.311223  |
| 6  | 6.702081  | 9.414617  | 2.102032  |
| 6  | 3.886225  | -4.233857 | 1.074063  |
| 6  | 0.912296  | -0.985151 | 3.091286  |
| 6  | 1.075652  | 1.656069  | -0.969603 |
| 6  | 3.599905  | -1.866335 | -3.152099 |
| 7  | 2.318136  | -2.479035 | 1.745739  |
| 6  | 3.043524  | -3.608909 | 1.992629  |
| 6  | 2.828632  | -4.034403 | 3.370177  |
| 6  | 1.973828  | -3.122479 | 3.932152  |
| 6  | 1.675854  | -2.134962 | 2.904765  |
| 6  | 1.421135  | -3.096589 | 5.325900  |
| 6  | 3.417907  | -5.268412 | 3.992556  |
| 6  | 2.627223  | -6.557308 | 3.677740  |
| 6  | 3.258645  | -7.805784 | 4.301111  |
| 7  | 1.137486  | 0.057986  | 0.881493  |
| 6  | 0.690093  | 0.042819  | 2.173176  |
| 6  | -0.000195 | 1.286998  | 2.463427  |
| 6  | 0.074467  | 2.055615  | 1.322607  |
| 6  | 0.785582  | 1.255073  | 0.331503  |
| 6  | -0.681230 | 1.611724  | 3.757936  |
| 6  | -0.462948 | 3.394508  | 1.081726  |

|   |           |           |           |
|---|-----------|-----------|-----------|
| 6 | -0.497131 | 4.398335  | 1.973398  |
| 7 | 2.226033  | -0.356155 | -1.796317 |
| 6 | 1.726559  | 0.914836  | -1.956642 |
| 6 | 1.985269  | 1.363877  | -3.307616 |
| 6 | 2.621782  | 0.329080  | -3.961776 |
| 6 | 2.811465  | -0.728882 | -2.975677 |
| 6 | 1.572247  | 2.684904  | -3.883811 |
| 6 | 3.025942  | 0.326677  | -5.365512 |
| 6 | 3.052007  | -0.724009 | -6.200097 |
| 7 | 3.485668  | -2.825506 | -0.894898 |
| 6 | 3.944624  | -2.807066 | -2.186304 |
| 6 | 4.882785  | -3.899651 | -2.382270 |
| 6 | 4.985931  | -4.556478 | -1.182039 |
| 6 | 4.105237  | -3.867030 | -0.251388 |
| 6 | 5.596349  | -4.187229 | -3.669424 |
| 6 | 5.862193  | -5.726905 | -0.834553 |
| 6 | 7.194044  | -5.326199 | -0.162811 |
| 6 | 8.066419  | -6.534990 | 0.188837  |
| 1 | -8.790049 | -0.738378 | 0.427396  |
| 1 | -8.308683 | 0.915763  | 0.834998  |
| 1 | -7.695443 | 3.807891  | -5.006830 |
| 1 | -6.314086 | 3.394420  | -3.989887 |
| 1 | -5.302380 | 2.904573  | 6.163497  |
| 1 | -5.900308 | 2.187195  | 7.669126  |
| 1 | -4.210571 | 2.706094  | 7.546040  |
| 1 | -5.734689 | -6.225915 | 5.643545  |
| 1 | -4.261103 | -5.574474 | 4.890396  |
| 1 | -5.094643 | -4.647441 | 6.153189  |
| 1 | -0.338484 | -4.229393 | -3.766966 |
| 1 | -1.052068 | -5.105030 | -5.136880 |
| 1 | -0.044414 | -5.956468 | -3.957861 |
| 1 | -4.252084 | 7.739469  | 3.665667  |
| 1 | -2.495897 | 7.544719  | 3.462298  |
| 1 | -3.353208 | 8.818544  | 2.572437  |
| 1 | 2.917149  | -0.175130 | 6.679863  |
| 1 | 3.102060  | 1.534195  | 7.117341  |
| 1 | 1.982071  | 1.070437  | 5.828295  |
| 1 | -0.039950 | 8.292288  | -1.876052 |
| 1 | -1.564655 | 7.791374  | -1.106385 |
| 1 | -0.072609 | 6.931861  | -0.727534 |
| 1 | -1.484219 | 3.669617  | -3.529315 |
| 1 | -1.161189 | 5.036041  | -4.594646 |
| 1 | 4.279037  | 3.592763  | -0.950425 |
| 1 | 5.741773  | 2.828437  | -0.340745 |
| 1 | 7.471204  | 6.834737  | -0.144877 |
| 1 | 7.096983  | 6.622441  | 1.571912  |
| 1 | 9.005136  | -6.223523 | 0.660628  |
| 1 | 7.551286  | -7.209175 | 0.884764  |
| 1 | 8.320307  | -7.116343 | -0.706376 |
| 1 | 2.677321  | -8.705130 | 4.067686  |

|   |           |           |           |
|---|-----------|-----------|-----------|
| 1 | 4.279150  | -7.963470 | 3.929928  |
| 1 | 3.315422  | -7.720320 | 5.393524  |
| 1 | 1.957999  | -4.601888 | -4.697304 |
| 1 | 0.944084  | -3.706674 | -5.817667 |
| 1 | 0.489685  | -5.812880 | -7.091326 |
| 1 | 2.734603  | -5.898185 | -8.189949 |
| 1 | 2.280111  | -4.227642 | -7.809848 |
| 1 | 3.457662  | -5.080520 | -6.796629 |
| 1 | 1.957740  | -7.808543 | -6.724985 |
| 1 | 2.620707  | -7.057728 | -5.264270 |
| 1 | 0.913622  | -7.527602 | -5.326140 |
| 1 | -7.234021 | 5.410638  | -3.159155 |
| 1 | -9.591168 | 5.727754  | -2.423151 |
| 1 | -9.503074 | 5.338738  | -4.150153 |
| 1 | -9.996691 | 4.092119  | -2.998677 |
| 1 | -7.793626 | 4.870857  | -0.811778 |
| 1 | -8.205112 | 3.210648  | -1.257475 |
| 1 | -6.523552 | 3.784532  | -1.391705 |
| 1 | -6.154402 | 1.250745  | -3.610558 |
| 1 | -8.503071 | -0.416182 | -4.031347 |
| 1 | -6.901913 | -2.315768 | -3.758700 |
| 1 | -6.290818 | -1.134909 | -4.943953 |
| 1 | -5.613581 | -1.195814 | -3.294704 |
| 1 | -7.164005 | 1.022969  | -1.288337 |
| 1 | -7.082565 | -0.635453 | 2.257610  |
| 1 | -5.952461 | 0.181173  | 1.186556  |
| 1 | -4.330127 | -1.135585 | 0.053289  |
| 1 | -8.027638 | -2.983524 | 1.254068  |
| 1 | -3.530874 | -3.302934 | -0.811323 |
| 1 | -7.214641 | -5.157347 | 0.413919  |
| 1 | -4.964145 | -5.328719 | -0.641961 |
| 1 | -3.332683 | 3.877236  | -5.176198 |
| 1 | -3.938788 | 4.235234  | -3.540648 |
| 1 | -3.631508 | 5.553280  | -4.682096 |
| 1 | -0.291704 | 6.636069  | -3.472661 |
| 1 | -3.728407 | 5.800069  | 2.186723  |
| 1 | -2.632876 | 6.308085  | 0.169000  |
| 1 | -5.082247 | 6.437121  | 0.178602  |
| 1 | -5.833847 | 7.043360  | 1.667445  |
| 1 | -4.922381 | 8.151033  | 0.614034  |
| 1 | -3.782207 | 0.950889  | 5.821951  |
| 1 | -3.926083 | -1.060401 | 7.295713  |
| 1 | -3.394969 | 0.359466  | 8.216978  |
| 1 | -5.065352 | -0.213604 | 8.355362  |
| 1 | -5.510222 | -0.784356 | 5.288652  |
| 1 | -6.685714 | 0.077717  | 6.297301  |
| 1 | -6.065632 | 0.835714  | 4.822140  |
| 1 | -6.200301 | -5.293029 | 3.370121  |
| 1 | -5.763512 | -3.131019 | 2.994106  |
| 1 | -8.060966 | -3.732230 | 3.965051  |

|   |           |           |           |
|---|-----------|-----------|-----------|
| 1 | -8.042988 | -5.125496 | 5.060187  |
| 1 | -7.396253 | -3.557462 | 5.601136  |
| 1 | 3.914457  | 0.265387  | 4.428828  |
| 1 | 5.038527  | 0.701197  | 5.710407  |
| 1 | 5.716295  | 3.026244  | 6.057594  |
| 1 | 2.718017  | 2.065146  | 3.133963  |
| 1 | 5.851041  | 5.330385  | 5.167106  |
| 1 | 2.826820  | 4.367531  | 2.254403  |
| 1 | 4.395646  | 6.023869  | 3.268931  |
| 1 | 5.221574  | 3.557658  | -3.280411 |
| 1 | 5.032645  | 1.939068  | -2.583424 |
| 1 | 5.752281  | 4.783159  | 1.049490  |
| 1 | 4.803096  | 7.600794  | 1.167300  |
| 1 | 5.182368  | 7.719389  | -0.551793 |
| 1 | 7.036844  | 9.324424  | -0.019001 |
| 1 | 7.087815  | 10.433118 | 2.229013  |
| 1 | 5.893779  | 9.273902  | 2.832374  |
| 1 | 7.511874  | 8.723899  | 2.362126  |
| 1 | 4.426956  | -5.104060 | 1.429345  |
| 1 | 0.483258  | -0.848956 | 4.078248  |
| 1 | 0.750518  | 2.652796  | -1.246647 |
| 1 | 4.062118  | -1.981257 | -4.124644 |
| 1 | 1.623674  | -2.141337 | 5.826308  |
| 1 | 0.331872  | -3.236566 | 5.333609  |
| 1 | 1.856146  | -3.889309 | 5.941619  |
| 1 | 3.470439  | -5.143101 | 5.081734  |
| 1 | 4.457019  | -5.397650 | 3.659269  |
| 1 | 2.551143  | -6.676908 | 2.589494  |
| 1 | 1.597535  | -6.437770 | 4.039107  |
| 1 | -1.440157 | 2.385532  | 3.606811  |
| 1 | -1.173541 | 0.730205  | 4.185026  |
| 1 | 0.020813  | 1.990841  | 4.513503  |
| 1 | -0.881151 | 3.579784  | 0.092160  |
| 1 | -0.952750 | 5.353495  | 1.724187  |
| 1 | -0.065035 | 4.296095  | 2.965612  |
| 1 | 2.224314  | 2.978341  | -4.713132 |
| 1 | 0.547394  | 2.655386  | -4.278562 |
| 1 | 1.612266  | 3.484824  | -3.136372 |
| 1 | 3.300780  | 1.300747  | -5.771539 |
| 1 | 3.368926  | -0.606289 | -7.232298 |
| 1 | 2.741553  | -1.719200 | -5.895987 |
| 1 | 6.171390  | -5.115761 | -3.607748 |
| 1 | 4.896250  | -4.287190 | -4.508761 |
| 1 | 6.297224  | -3.383767 | -3.930828 |
| 1 | 6.084426  | -6.301738 | -1.742754 |
| 1 | 5.322729  | -6.417134 | -0.170946 |
| 1 | 6.979503  | -4.743409 | 0.742224  |
| 1 | 7.741162  | -4.652435 | -0.834660 |
| 1 | 4.255148  | 10.173044 | 0.964890  |
| 1 | 5.535098  | 11.270945 | 0.424246  |

|    |           |           |           |
|----|-----------|-----------|-----------|
| 1  | 4.791310  | 10.143562 | -0.724262 |
| 6  | 0.441933  | -2.433829 | -0.401109 |
| 6  | 0.148666  | -3.803416 | 0.025712  |
| 6  | 0.904512  | -4.859719 | -0.514864 |
| 6  | -0.905792 | -4.126679 | 0.927593  |
| 6  | 0.591742  | -6.190672 | -0.243991 |
| 1  | 1.710758  | -4.614919 | -1.194557 |
| 6  | -1.185976 | -5.461487 | 1.237927  |
| 6  | -0.447096 | -6.484821 | 0.639056  |
| 1  | 1.164457  | -6.988140 | -0.707904 |
| 1  | -1.979963 | -5.706531 | 1.933453  |
| 1  | -0.686031 | -7.518245 | 0.876801  |
| 6  | -0.738995 | -1.707594 | -0.962016 |
| 8  | -1.314967 | -0.731487 | -0.528582 |
| 8  | -1.056618 | -2.299754 | -2.152856 |
| 6  | -2.041013 | -1.637693 | -2.978946 |
| 1  | -2.471684 | -2.441716 | -3.580781 |
| 1  | -2.816793 | -1.214584 | -2.336228 |
| 6  | -1.403860 | -0.568296 | -3.854095 |
| 1  | -0.979766 | 0.229944  | -3.238532 |
| 1  | -0.604609 | -0.991907 | -4.469940 |
| 1  | -2.159655 | -0.134096 | -4.520382 |
| 8  | -1.550051 | -3.069237 | 1.472422  |
| 6  | -2.501497 | -3.296560 | 2.510226  |
| 1  | -3.352340 | -3.886280 | 2.162247  |
| 1  | -2.029656 | -3.794780 | 3.366179  |
| 1  | -2.855484 | -2.311394 | 2.810355  |
| 7  | -3.971968 | 1.692390  | -1.815903 |
| 7  | -2.992617 | 1.982383  | -1.393547 |
| 77 | 2.203392  | -1.456129 | -0.050044 |
| 6  | 3.908072  | -0.353955 | 0.652220  |
| 1  | 3.856179  | -0.211617 | 1.736849  |
| 1  | 4.828391  | -0.901985 | 0.418123  |
| 1  | 3.947333  | 0.631063  | 0.172629  |
| 1  | 7.768318  | 3.725287  | -2.948196 |

-----  
**Qmutated-A<sub>Ir(Me)</sub>**  
 -----

-----Number of imaginary frequencies: 10    Electronic energy:    HF=-4200.06901572  
 Zero-point correction=                            2.034047 (Hartree/Particle)  
 Thermal correction to Energy=                    2.153830  
 Thermal correction to Enthalpy=                2.154774  
 Thermal correction to Gibbs Free Energy=      1.826212  
 Sum of electronic and zero-point Energies=    -4198.034969  
 Sum of electronic and thermal Energies=       -4197.915186  
 Sum of electronic and thermal Enthalpies=     -4197.914241  
 Sum of electronic and thermal Free Energies=   -4198.242803

.....  
 Cartesian Coordinates  
 .....

|   |           |           |           |
|---|-----------|-----------|-----------|
| 6 | -3.594067 | -4.433811 | -4.433424 |
| 6 | -4.291336 | -4.717252 | -3.097591 |
| 6 | -5.730941 | -4.176575 | -2.982964 |
| 6 | -6.395802 | -4.684293 | -1.694441 |
| 6 | -5.791018 | -2.642612 | -3.051118 |
| 6 | -3.953519 | 6.723492  | -4.015885 |
| 6 | -5.263052 | 6.047987  | -3.634160 |
| 8 | -6.324650 | 6.651615  | -3.531549 |
| 6 | -3.549298 | 7.896289  | -3.083948 |
| 6 | -4.448088 | 9.128993  | -3.261693 |
| 6 | -3.484339 | 7.455610  | -1.613514 |
| 7 | -5.172561 | 4.698419  | -3.379238 |
| 6 | -6.356760 | 3.896482  | -3.094954 |
| 6 | -6.720381 | 3.821528  | -1.599439 |
| 8 | -7.768018 | 3.281595  | -1.252359 |
| 6 | -6.212108 | 2.479743  | -3.662413 |
| 7 | -5.809710 | 4.348362  | -0.742562 |
| 6 | -5.995072 | 4.383726  | 0.695769  |
| 6 | -4.943849 | 3.580132  | 1.476864  |
| 6 | -4.866818 | 2.086177  | 1.202130  |
| 6 | -3.680238 | 1.402415  | 1.515557  |
| 6 | -5.941365 | 1.346115  | 0.688320  |
| 6 | -3.568671 | 0.021636  | 1.336809  |
| 6 | -5.831602 | -0.036894 | 0.504565  |
| 6 | -4.651890 | -0.705986 | 0.831626  |
| 6 | 1.152861  | 4.203187  | -4.419311 |
| 6 | 2.101269  | 4.442536  | -3.261496 |
| 8 | 2.074953  | 3.769914  | -2.231174 |
| 6 | -0.228588 | 3.733138  | -3.954385 |
| 7 | 3.007670  | 5.434062  | -3.453980 |
| 6 | 4.075552  | 5.643796  | -2.501606 |
| 6 | 2.659185  | 7.718352  | 2.157388  |
| 6 | 1.495174  | 7.128567  | 1.356894  |
| 6 | -1.513431 | 4.418438  | 6.792893  |
| 6 | -2.313396 | 3.106392  | 6.784410  |
| 6 | -3.326467 | 3.068572  | 7.937683  |
| 6 | -3.009233 | 2.885207  | 5.432739  |
| 6 | -6.534431 | -1.385579 | 5.769155  |
| 6 | -6.208190 | -0.581649 | 4.515352  |
| 8 | -4.794575 | -0.337386 | 4.530219  |
| 6 | -6.989716 | 0.732213  | 4.449992  |
| 6 | 3.758653  | -1.650664 | 5.493342  |
| 6 | 4.761659  | -1.908904 | 4.354300  |
| 6 | 5.719173  | -0.753106 | 4.151646  |
| 6 | 6.927340  | -0.688410 | 4.860261  |
| 6 | 5.398650  | 0.302370  | 3.286064  |
| 6 | 7.787983  | 0.401126  | 4.716987  |
| 6 | 6.255793  | 1.394632  | 3.137841  |
| 6 | 7.452887  | 1.448936  | 3.856282  |
| 6 | 6.357743  | -1.158545 | -2.291491 |



|   |           |           |           |
|---|-----------|-----------|-----------|
| 6 | 7.443137  | -0.107243 | -2.171466 |
| 8 | 7.427843  | 0.927811  | -2.835114 |
| 7 | 8.434351  | -0.396568 | -1.279223 |
| 6 | 9.521564  | 0.529404  | -0.998075 |
| 6 | 9.134985  | 1.661057  | -0.032823 |
| 6 | 10.261213 | 2.684986  | 0.212700  |
| 6 | 9.718157  | 3.912563  | 0.959769  |
| 6 | 11.454564 | 2.079434  | 0.969946  |
| 6 | -1.080551 | -5.170194 | 0.211676  |
| 6 | -0.096358 | -1.112716 | 2.673522  |
| 6 | 2.429550  | 0.569608  | -1.110540 |
| 6 | 1.493586  | -3.517990 | -3.547921 |
| 7 | -0.403734 | -3.003759 | 1.140046  |
| 6 | -1.080897 | -4.198711 | 1.208382  |
| 6 | -1.777346 | -4.299086 | 2.481788  |
| 6 | -1.494501 | -3.154201 | 3.180880  |
| 6 | -0.624462 | -2.353039 | 2.335032  |
| 6 | -1.987186 | -2.747720 | 4.538579  |
| 6 | -2.669574 | -5.436551 | 2.890785  |
| 6 | -4.111741 | -5.318951 | 2.350335  |
| 6 | -5.003327 | -6.488246 | 2.779061  |
| 7 | 1.095289  | -0.587050 | 0.591731  |
| 6 | 0.696177  | -0.288824 | 1.875512  |
| 6 | 1.197091  | 1.014932  | 2.260263  |
| 6 | 1.910493  | 1.499298  | 1.183509  |
| 6 | 1.834200  | 0.480639  | 0.143114  |
| 6 | 0.915953  | 1.692222  | 3.567418  |
| 6 | 2.586420  | 2.784893  | 1.019598  |
| 6 | 3.194798  | 3.486041  | 1.991524  |
| 7 | 1.734634  | -1.591363 | -2.056398 |
| 6 | 2.377326  | -0.373926 | -2.133516 |
| 6 | 2.976183  | -0.215551 | -3.442138 |
| 6 | 2.672720  | -1.353092 | -4.158620 |
| 6 | 1.916264  | -2.221887 | -3.263568 |
| 6 | 3.738921  | 0.990784  | -3.906425 |
| 6 | 3.044906  | -1.602528 | -5.550623 |
| 6 | 2.343211  | -2.270919 | -6.479594 |
| 7 | 0.286528  | -4.030064 | -1.472704 |
| 6 | 0.741104  | -4.352711 | -2.730221 |
| 6 | 0.286600  | -5.685082 | -3.090224 |
| 6 | -0.454270 | -6.151347 | -2.035354 |
| 6 | -0.442213 | -5.105495 | -1.022856 |
| 6 | 0.601004  | -6.367824 | -4.388235 |
| 6 | -1.126923 | -7.487190 | -1.886569 |
| 6 | -0.293312 | -8.518652 | -1.094909 |
| 6 | -1.004230 | -9.867462 | -0.948607 |
| 1 | -7.004660 | 4.013504  | 0.886725  |
| 1 | -5.962551 | 5.425438  | 1.040672  |
| 1 | -4.070615 | 7.105225  | -5.038325 |
| 1 | -3.137611 | 5.988686  | -4.040669 |

|   |           |            |           |
|---|-----------|------------|-----------|
| 1 | -0.764020 | 4.434629   | 5.992069  |
| 1 | -2.176852 | 5.281176   | 6.645228  |
| 1 | -0.989772 | 4.561484   | 7.745947  |
| 1 | -7.601016 | -1.632955  | 5.803654  |
| 1 | -5.958618 | -2.316623  | 5.790018  |
| 1 | -6.282649 | -0.808254  | 6.666493  |
| 1 | -2.597115 | -4.888145  | -4.451090 |
| 1 | -4.167051 | -4.843681  | -5.275274 |
| 1 | -3.465995 | -3.359960  | -4.609136 |
| 1 | 2.599433  | 7.435539   | 3.214703  |
| 1 | 3.625735  | 7.366370   | 1.777291  |
| 1 | 2.665764  | 8.813593   | 2.108509  |
| 1 | 3.081776  | -2.503493  | 5.620350  |
| 1 | 4.277554  | -1.480962  | 6.443693  |
| 1 | 3.150337  | -0.763408  | 5.283155  |
| 1 | 4.602680  | 6.567855   | -2.751818 |
| 1 | 3.660023  | 5.733563   | -1.494811 |
| 1 | 4.792508  | 4.813420   | -2.500485 |
| 1 | 1.607571  | 3.427875   | -5.052300 |
| 1 | 1.070169  | 5.103309   | -5.041881 |
| 1 | 5.436377  | -0.791405  | -1.826996 |
| 1 | 6.621178  | -2.114070  | -1.825851 |
| 1 | 9.834167  | 0.960639   | -1.954920 |
| 1 | 10.359286 | -0.057975  | -0.608226 |
| 1 | -0.391356 | -10.581646 | -0.387042 |
| 1 | -1.958863 | -9.758725  | -0.418672 |
| 1 | -1.220039 | -10.311595 | -1.928404 |
| 1 | -6.019497 | -6.379757  | 2.383372  |
| 1 | -4.605515 | -7.445089  | 2.418090  |
| 1 | -5.075859 | -6.552310  | 3.871881  |
| 1 | -3.687128 | -4.304545  | -2.276114 |
| 1 | -4.316140 | -5.804825  | -2.937692 |
| 1 | -6.304204 | -4.574653  | -3.835403 |
| 1 | -7.432066 | -4.334338  | -1.613626 |
| 1 | -6.407542 | -5.780386  | -1.655266 |
| 1 | -5.854565 | -4.326332  | -0.807956 |
| 1 | -6.825540 | -2.287117  | -2.970738 |
| 1 | -5.219847 | -2.190714  | -2.228958 |
| 1 | -5.382889 | -2.256325  | -3.991343 |
| 1 | -2.531520 | 8.177627   | -3.391150 |
| 1 | -4.100866 | 9.950771   | -2.623838 |
| 1 | -4.430998 | 9.480638   | -4.300393 |
| 1 | -5.485180 | 8.897941   | -3.005865 |
| 1 | -3.095193 | 8.261802   | -0.981624 |
| 1 | -4.483110 | 7.199035   | -1.238487 |
| 1 | -2.827317 | 6.585860   | -1.479864 |
| 1 | -4.310893 | 4.216267   | -3.596869 |
| 1 | -7.205268 | 4.399915   | -3.568457 |
| 1 | -7.106484 | 1.902697   | -3.418105 |
| 1 | -6.092145 | 2.508720   | -4.750409 |

|   |           |           |           |
|---|-----------|-----------|-----------|
| 1 | -5.348306 | 1.963159  | -3.225171 |
| 1 | -4.999237 | 4.796341  | -1.146936 |
| 1 | -5.146065 | 3.739924  | 2.546839  |
| 1 | -3.953134 | 4.022358  | 1.301792  |
| 1 | -2.828529 | 1.959885  | 1.900297  |
| 1 | -6.863462 | 1.840839  | 0.399995  |
| 1 | -2.637791 | -0.481405 | 1.581827  |
| 1 | -6.675767 | -0.587932 | 0.098277  |
| 1 | -4.567913 | -1.780315 | 0.691711  |
| 1 | -0.853371 | 3.463856  | -4.812635 |
| 1 | -0.129199 | 2.861992  | -3.301862 |
| 1 | -0.739529 | 4.519777  | -3.386475 |
| 1 | 3.054220  | 5.888887  | -4.353775 |
| 1 | 1.491554  | 6.034004  | 1.407552  |
| 1 | -1.603251 | 2.279157  | 6.935049  |
| 1 | -3.876198 | 2.120089  | 7.952688  |
| 1 | -2.831428 | 3.187490  | 8.909287  |
| 1 | -4.061698 | 3.878411  | 7.838008  |
| 1 | -3.549681 | 1.931535  | 5.404364  |
| 1 | -3.733302 | 3.688071  | 5.234838  |
| 1 | -2.282503 | 2.887878  | 4.609945  |
| 1 | -6.459175 | -1.187531 | 3.630063  |
| 1 | -4.550423 | 0.038303  | 3.667080  |
| 1 | -6.737130 | 1.288735  | 3.540527  |
| 1 | -8.070817 | 0.547470  | 4.439583  |
| 1 | -6.751908 | 1.357771  | 5.318235  |
| 1 | 4.208463  | -2.098879 | 3.426009  |
| 1 | 5.328125  | -2.822852 | 4.575019  |
| 1 | 7.195304  | -1.501922 | 5.531829  |
| 1 | 4.468665  | 0.270395  | 2.722100  |
| 1 | 8.719543  | 0.431521  | 5.276867  |
| 1 | 5.983479  | 2.199795  | 2.460712  |
| 1 | 8.117843  | 2.301974  | 3.748175  |
| 1 | 8.327978  | -1.207518 | -0.687464 |
| 1 | 8.806485  | 1.234670  | 0.925975  |
| 1 | 8.268444  | 2.174847  | -0.465793 |
| 1 | 10.621365 | 3.026485  | -0.770394 |
| 1 | 12.234251 | 2.831850  | 1.138621  |
| 1 | 11.140522 | 1.700500  | 1.951589  |
| 1 | 11.915644 | 1.248737  | 0.423863  |
| 1 | -1.640113 | -6.075751 | 0.419789  |
| 1 | -0.340112 | -0.740358 | 3.662707  |
| 1 | 2.972373  | 1.482066  | -1.324032 |
| 1 | 1.784157  | -3.917260 | -4.512002 |
| 1 | -1.187492 | -2.301472 | 5.142002  |
| 1 | -2.804358 | -2.015151 | 4.484377  |
| 1 | -2.366852 | -3.612297 | 5.092803  |
| 1 | -2.709398 | -5.494288 | 3.986131  |
| 1 | -2.241500 | -6.392085 | 2.556952  |
| 1 | -4.081176 | -5.256151 | 1.254354  |

|    |           |           |           |
|----|-----------|-----------|-----------|
| 1  | -4.543734 | -4.372008 | 2.699621  |
| 1  | 0.986784  | 2.779395  | 3.460639  |
| 1  | -0.086446 | 1.452747  | 3.940082  |
| 1  | 1.629278  | 1.397254  | 4.349796  |
| 1  | 2.582838  | 3.197759  | 0.011547  |
| 1  | 3.656896  | 4.445944  | 1.777203  |
| 1  | 3.279152  | 3.126020  | 3.012571  |
| 1  | 3.730738  | 1.061881  | -4.998879 |
| 1  | 3.297922  | 1.908225  | -3.505137 |
| 1  | 4.791035  | 0.972311  | -3.588714 |
| 1  | 3.990637  | -1.157040 | -5.860169 |
| 1  | 2.725776  | -2.384603 | -7.489945 |
| 1  | 1.364951  | -2.697306 | -6.279364 |
| 1  | 0.092276  | -7.333257 | -4.464802 |
| 1  | 0.292597  | -5.763191 | -5.250769 |
| 1  | 1.677440  | -6.554677 | -4.497696 |
| 1  | -1.347156 | -7.900615 | -2.879111 |
| 1  | -2.101534 | -7.363521 | -1.394180 |
| 1  | -0.060410 | -8.109479 | -0.103331 |
| 1  | 0.671366  | -8.657180 | -1.600299 |
| 1  | 9.336448  | 3.631200  | 1.950055  |
| 1  | 10.500815 | 4.666313  | 1.108449  |
| 1  | 8.896123  | 4.383389  | 0.407909  |
| 77 | 0.737217  | -2.332456 | -0.422476 |
| 6  | 2.471479  | -3.173629 | 0.313234  |
| 1  | 2.257190  | -3.642591 | 1.278093  |
| 1  | 2.829985  | -3.923429 | -0.398002 |
| 1  | 3.219984  | -2.384958 | 0.435142  |
| 1  | 6.142522  | -1.328340 | -3.349377 |
| 1  | 1.555196  | 7.411865  | 0.299213  |
| 1  | 0.530502  | 7.482795  | 1.738880  |

-----  
**Qmutated-BIr(Me)**  
 -----

-----Number of imaginary frequencies: 8    Electronic energy:    HF=-4961.5739089  
 Zero-point correction=                    2.254257 (Hartree/Particle)  
 Thermal correction to Energy=            2.393912  
 Thermal correction to Enthalpy=         2.394856  
 Thermal correction to Gibbs Free Energy=    2.018552  
 Sum of electronic and zero-point Energies=    -4959.319652  
 Sum of electronic and thermal Energies=    -4959.179997  
 Sum of electronic and thermal Enthalpies=    -4959.179053  
 Sum of electronic and thermal Free Energies=   -4959.555357

-----  
 Cartesian Coordinates  
 -----

|   |          |          |           |
|---|----------|----------|-----------|
| 6 | 0.193144 | 6.641628 | -0.667274 |
| 6 | 1.457731 | 6.157701 | 0.052171  |
| 6 | 2.773328 | 6.803253 | -0.427823 |
| 6 | 3.938712 | 6.403052 | 0.490068  |

|   |           |           |           |
|---|-----------|-----------|-----------|
| 6 | 3.097134  | 6.458806  | -1.889745 |
| 6 | 5.500112  | -1.620498 | -5.992652 |
| 6 | 6.399735  | -0.567810 | -5.356016 |
| 8 | 7.588245  | -0.459096 | -5.646216 |
| 6 | 5.880533  | -3.079386 | -5.626177 |
| 6 | 7.214151  | -3.515410 | -6.250520 |
| 6 | 5.871954  | -3.302575 | -4.106013 |
| 7 | 5.800140  | 0.257055  | -4.436838 |
| 6 | 6.569006  | 1.295951  | -3.763741 |
| 6 | 7.345003  | 0.806839  | -2.520290 |
| 8 | 8.392192  | 1.345432  | -2.188156 |
| 6 | 5.684669  | 2.493700  | -3.394687 |
| 7 | 6.758394  | -0.208003 | -1.815296 |
| 6 | 7.460523  | -0.907981 | -0.749498 |
| 6 | 7.103335  | -0.475538 | 0.689905  |
| 6 | 7.530992  | 0.923501  | 1.085273  |
| 6 | 6.584549  | 1.929821  | 1.313962  |
| 6 | 8.887974  | 1.235208  | 1.256653  |
| 6 | 6.980397  | 3.213349  | 1.701613  |
| 6 | 9.287694  | 2.513459  | 1.642646  |
| 6 | 8.333178  | 3.509549  | 1.867786  |
| 6 | -0.102003 | -2.181783 | -5.047708 |
| 6 | -0.345548 | -3.410177 | -4.201093 |
| 8 | 0.171657  | -3.563661 | -3.095822 |
| 6 | 1.392739  | -1.987023 | -5.343779 |
| 7 | -1.179196 | -4.325203 | -4.767702 |
| 6 | -1.484239 | -5.578118 | -4.127086 |
| 6 | 1.858819  | -8.430612 | -1.177088 |
| 6 | 1.916190  | -7.553268 | -2.431235 |
| 6 | 5.211796  | -5.886520 | 4.486528  |
| 6 | 5.106917  | -7.049559 | 3.488986  |
| 6 | 4.376807  | -8.247606 | 4.113121  |
| 6 | 4.424364  | -6.602310 | 2.188121  |
| 6 | 6.720440  | 1.419692  | 6.554380  |
| 6 | 6.546676  | 0.472161  | 5.366204  |
| 8 | 5.510103  | -0.490120 | 5.634428  |
| 6 | 7.848872  | -0.222436 | 4.969100  |
| 6 | -2.321478 | -3.512457 | 6.468144  |
| 6 | -3.761187 | -3.612483 | 5.931645  |
| 6 | -3.936182 | -4.752520 | 4.950165  |
| 6 | -4.278298 | -6.037218 | 5.395178  |
| 6 | -3.711757 | -4.561928 | 3.579508  |
| 6 | -4.384970 | -7.103170 | 4.500429  |
| 6 | -3.815814 | -5.624331 | 2.679164  |
| 6 | -4.150386 | -6.900475 | 3.138627  |
| 6 | -6.373049 | -1.796143 | -0.477286 |
| 6 | -6.826453 | -3.176066 | -0.910843 |
| 8 | -6.572437 | -3.634584 | -2.024043 |
| 7 | -7.541451 | -3.871839 | 0.019905  |
| 6 | -8.017420 | -5.225809 | -0.219295 |

|   |           |           |           |
|---|-----------|-----------|-----------|
| 6 | -6.955859 | -6.307753 | 0.033406  |
| 6 | -7.430349 | -7.738602 | -0.290438 |
| 6 | -6.249525 | -8.720079 | -0.242162 |
| 6 | -8.559325 | -8.211823 | 0.640020  |
| 6 | -3.478212 | 5.303251  | 1.192445  |
| 6 | -1.360329 | 1.205961  | 2.681558  |
| 6 | -2.744779 | -1.003239 | -1.403971 |
| 6 | -4.921248 | 3.078978  | -2.865717 |
| 7 | -2.513576 | 3.088216  | 1.610500  |
| 6 | -2.761907 | 4.393175  | 1.965118  |
| 6 | -2.178822 | 4.669337  | 3.269924  |
| 6 | -1.586358 | 3.506843  | 3.688844  |
| 6 | -1.805486 | 2.521436  | 2.645117  |
| 6 | -0.838627 | 3.240202  | 4.960914  |
| 6 | -2.219118 | 5.998109  | 3.971591  |
| 6 | -1.126515 | 6.986562  | 3.508954  |
| 6 | -1.196644 | 8.331088  | 4.239503  |
| 7 | -2.193728 | 0.428078  | 0.508892  |
| 6 | -1.521962 | 0.236335  | 1.695831  |
| 6 | -0.993500 | -1.111779 | 1.754623  |
| 6 | -1.357208 | -1.733438 | 0.579822  |
| 6 | -2.124487 | -0.757321 | -0.183945 |
| 6 | -0.157417 | -1.661045 | 2.869070  |
| 6 | -0.999611 | -3.063329 | 0.088679  |
| 6 | -0.839347 | -4.166763 | 0.836605  |
| 7 | -3.696231 | 1.221179  | -1.841418 |
| 6 | -3.487766 | -0.102791 | -2.164462 |
| 6 | -4.137266 | -0.412388 | -3.419648 |
| 6 | -4.699312 | 0.760191  | -3.876711 |
| 6 | -4.437779 | 1.773463  | -2.859576 |
| 6 | -4.195117 | -1.773397 | -4.047247 |
| 6 | -5.426134 | 0.922930  | -5.135777 |
| 6 | -5.427798 | 1.994255  | -5.944100 |
| 7 | -4.006191 | 3.882517  | -0.733839 |
| 6 | -4.715745 | 4.056805  | -1.898636 |
| 6 | -5.222164 | 5.416621  | -1.966764 |
| 6 | -4.809702 | 6.052598  | -0.825125 |
| 6 | -4.056805 | 5.075708  | -0.052831 |
| 6 | -6.035132 | 5.964557  | -3.101517 |
| 6 | -5.090847 | 7.464033  | -0.391795 |
| 6 | -6.303507 | 7.594262  | 0.555890  |
| 6 | -6.563557 | 9.040002  | 0.989847  |
| 1 | 8.531944  | -0.760134 | -0.917027 |
| 1 | 7.245515  | -1.977449 | -0.852637 |
| 1 | 5.578902  | -1.492165 | -7.079137 |
| 1 | 4.452555  | -1.445692 | -5.716732 |
| 1 | 5.764277  | -5.041259 | 4.058012  |
| 1 | 4.213966  | -5.526453 | 4.771830  |
| 1 | 5.727901  | -6.192414 | 5.404764  |
| 1 | 7.440810  | 2.212558  | 6.323230  |

|   |           |           |           |
|---|-----------|-----------|-----------|
| 1 | 5.764706  | 1.884275  | 6.817823  |
| 1 | 7.092622  | 0.877054  | 7.434593  |
| 1 | -0.703657 | 6.185170  | -0.233336 |
| 1 | 0.087089  | 7.731286  | -0.586954 |
| 1 | 0.204457  | 6.389916  | -1.733840 |
| 1 | 2.261409  | -9.431859 | -1.370832 |
| 1 | 2.441196  | -7.992174 | -0.358234 |
| 1 | 0.829162  | -8.552418 | -0.820208 |
| 1 | -2.222624 | -2.681523 | 7.176480  |
| 1 | -2.029417 | -4.435284 | 6.982090  |
| 1 | -1.609486 | -3.349642 | 5.650835  |
| 1 | -1.034427 | -6.426441 | -4.659271 |
| 1 | -1.071002 | -5.540966 | -3.118721 |
| 1 | -2.567038 | -5.736571 | -4.066233 |
| 1 | -0.479677 | -1.319224 | -4.483381 |
| 1 | -0.674725 | -2.222355 | -5.982735 |
| 1 | -5.285070 | -1.789675 | -0.356561 |
| 1 | -6.831103 | -1.457853 | 0.457687  |
| 1 | -8.341793 | -5.272432 | -1.263907 |
| 1 | -8.899194 | -5.380652 | 0.411148  |
| 1 | -7.429861 | 9.105551  | 1.657860  |
| 1 | -5.699699 | 9.457292  | 1.522436  |
| 1 | -6.760254 | 9.685442  | 0.124704  |
| 1 | -0.410259 | 9.012647  | 3.895963  |
| 1 | -2.162070 | 8.824820  | 4.071857  |
| 1 | -1.076363 | 8.201994  | 5.322389  |
| 1 | 1.540163  | 5.064372  | -0.049698 |
| 1 | 1.345703  | 6.352514  | 1.128281  |
| 1 | 2.650363  | 7.895731  | -0.358376 |
| 1 | 4.874991  | 6.881231  | 0.178762  |
| 1 | 3.744007  | 6.690949  | 1.530558  |
| 1 | 4.099961  | 5.316826  | 0.468750  |
| 1 | 4.034093  | 6.931925  | -2.206575 |
| 1 | 3.217014  | 5.374015  | -2.016381 |
| 1 | 2.310787  | 6.791662  | -2.575827 |
| 1 | 5.087310  | -3.707685 | -6.057773 |
| 1 | 7.429705  | -4.562245 | -6.003131 |
| 1 | 7.184934  | -3.426919 | -7.343352 |
| 1 | 8.037738  | -2.892059 | -5.891963 |
| 1 | 6.025423  | -4.361298 | -3.867004 |
| 1 | 6.678040  | -2.736055 | -3.623243 |
| 1 | 4.919963  | -2.993388 | -3.656830 |
| 1 | 4.829274  | 0.114869  | -4.178692 |
| 1 | 7.349515  | 1.613503  | -4.458414 |
| 1 | 6.291229  | 3.257731  | -2.900206 |
| 1 | 5.232702  | 2.928395  | -4.292902 |
| 1 | 4.883733  | 2.200068  | -2.705897 |
| 1 | 5.963194  | -0.665086 | -2.240689 |
| 1 | 7.588875  | -1.203136 | 1.357157  |
| 1 | 6.025863  | -0.590481 | 0.847529  |

|   |           |           |           |
|---|-----------|-----------|-----------|
| 1 | 5.527708  | 1.709961  | 1.190221  |
| 1 | 9.640189  | 0.469576  | 1.079775  |
| 1 | 6.227127  | 3.978382  | 1.873444  |
| 1 | 10.345149 | 2.734546  | 1.763621  |
| 1 | 8.643971  | 4.507073  | 2.167793  |
| 1 | 1.552807  | -1.076450 | -5.931535 |
| 1 | 1.957166  | -1.901520 | -4.412243 |
| 1 | 1.792840  | -2.831872 | -5.916516 |
| 1 | -1.541589 | -4.146661 | -5.692174 |
| 1 | 2.946421  | -7.436363 | -2.787108 |
| 1 | 6.129410  | -7.370692 | 3.239706  |
| 1 | 4.329407  | -9.092769 | 3.416090  |
| 1 | 4.879950  | -8.591864 | 5.024830  |
| 1 | 3.346132  | -7.980453 | 4.381895  |
| 1 | 4.376130  | -7.421433 | 1.460409  |
| 1 | 3.395407  | -6.269796 | 2.380293  |
| 1 | 4.961945  | -5.770399 | 1.716933  |
| 1 | 6.167050  | 1.033693  | 4.506391  |
| 1 | 5.803407  | -1.029281 | 6.387478  |
| 1 | 7.673662  | -0.915464 | 4.140168  |
| 1 | 8.601712  | 0.506281  | 4.649730  |
| 1 | 8.262746  | -0.791069 | 5.813897  |
| 1 | -4.031972 | -2.664653 | 5.449320  |
| 1 | -4.450662 | -3.742188 | 6.775677  |
| 1 | -4.462956 | -6.202661 | 6.454879  |
| 1 | -3.452617 | -3.571039 | 3.211329  |
| 1 | -4.651729 | -8.091411 | 4.866669  |
| 1 | -3.629329 | -5.452682 | 1.622584  |
| 1 | -4.225619 | -7.729826 | 2.440476  |
| 1 | -7.635797 | -3.483313 | 0.946706  |
| 1 | -6.618238 | -6.257972 | 1.078780  |
| 1 | -6.088469 | -6.065721 | -0.592804 |
| 1 | -7.818900 | -7.734973 | -1.320773 |
| 1 | -8.864134 | -9.236330 | 0.395329  |
| 1 | -8.229200 | -8.204962 | 1.687360  |
| 1 | -9.451615 | -7.580049 | 0.566871  |
| 1 | -3.602475 | 6.297344  | 1.608348  |
| 1 | -0.811342 | 0.908162  | 3.567923  |
| 1 | -2.646835 | -2.007821 | -1.801100 |
| 1 | -5.538861 | 3.357552  | -3.710749 |
| 1 | -1.296298 | 2.425673  | 5.537561  |
| 1 | 0.200089  | 2.946190  | 4.761504  |
| 1 | -0.814246 | 4.124868  | 5.603944  |
| 1 | -2.117437 | 5.843599  | 5.053450  |
| 1 | -3.203341 | 6.466454  | 3.831310  |
| 1 | -1.217417 | 7.144821  | 2.426600  |
| 1 | -0.142337 | 6.526097  | 3.667242  |
| 1 | 0.516058  | -2.437085 | 2.491034  |
| 1 | 0.452583  | -0.880882 | 3.335462  |
| 1 | -0.769450 | -2.117232 | 3.660035  |



|    |           |           |           |
|----|-----------|-----------|-----------|
| 1  | -0.816098 | -3.145856 | -0.982342 |
| 1  | -0.526638 | -5.101626 | 0.379623  |
| 1  | -1.026423 | -4.188150 | 1.906027  |
| 1  | -4.545492 | -1.716048 | -5.082057 |
| 1  | -3.213127 | -2.261571 | -4.061433 |
| 1  | -4.880170 | -2.432288 | -3.495026 |
| 1  | -6.000880 | 0.052500  | -5.452326 |
| 1  | -6.006114 | 1.996584  | -6.863625 |
| 1  | -4.840400 | 2.883911  | -5.737270 |
| 1  | -6.234157 | 7.032279  | -2.970582 |
| 1  | -5.523691 | 5.839674  | -4.064567 |
| 1  | -7.005827 | 5.458472  | -3.187216 |
| 1  | -5.266272 | 8.091567  | -1.275092 |
| 1  | -4.205737 | 7.888528  | 0.102051  |
| 1  | -6.140783 | 6.962566  | 1.438851  |
| 1  | -7.191204 | 7.189259  | 0.052834  |
| 1  | -5.822502 | -8.767920 | 0.768313  |
| 1  | -6.563910 | -9.734244 | -0.516553 |
| 1  | -5.450305 | -8.417333 | -0.928906 |
| 6  | 3.079968  | -0.295429 | -0.420084 |
| 6  | 2.939693  | 0.423659  | 0.866206  |
| 6  | 2.625543  | 1.793075  | 0.897305  |
| 6  | 3.185498  | -0.219788 | 2.108894  |
| 6  | 2.555096  | 2.502117  | 2.096481  |
| 1  | 2.432171  | 2.309154  | -0.032418 |
| 6  | 3.142040  | 0.497217  | 3.308781  |
| 6  | 2.825327  | 1.857382  | 3.300697  |
| 1  | 2.303111  | 3.557878  | 2.076198  |
| 1  | 3.389318  | 0.008654  | 4.243897  |
| 1  | 2.803931  | 2.405118  | 4.238976  |
| 6  | 2.726234  | 0.146381  | -1.781902 |
| 8  | 3.217708  | -0.348693 | -2.794592 |
| 8  | 1.810827  | 1.125314  | -1.809231 |
| 6  | 1.398228  | 1.588783  | -3.120951 |
| 1  | 2.267437  | 2.020352  | -3.627881 |
| 1  | 1.061796  | 0.725821  | -3.701653 |
| 6  | 0.290806  | 2.604721  | -2.917069 |
| 1  | -0.567109 | 2.152831  | -2.409228 |
| 1  | 0.638678  | 3.456881  | -2.324333 |
| 1  | -0.045020 | 2.978852  | -3.890463 |
| 8  | 3.477757  | -1.549634 | 2.043110  |
| 6  | 3.727809  | -2.268123 | 3.249487  |
| 1  | 4.566158  | -1.841060 | 3.809897  |
| 1  | 2.835300  | -2.279258 | 3.887600  |
| 1  | 3.961091  | -3.287168 | 2.936710  |
| 77 | -3.155621 | 2.136893  | -0.084777 |
| 6  | -4.928870 | 1.601683  | 0.824496  |
| 1  | -5.216056 | 2.390211  | 1.526008  |
| 1  | -5.698844 | 1.485236  | 0.056428  |
| 1  | -4.781711 | 0.658573  | 1.358742  |

|   |           |           |           |
|---|-----------|-----------|-----------|
| 7 | 3.729593  | -1.446667 | -0.494995 |
| 7 | 4.260419  | -2.435127 | -0.665752 |
| 1 | -6.610411 | -1.080296 | -1.268984 |
| 1 | 1.334132  | -7.993616 | -3.250016 |
| 1 | 1.518605  | -6.549048 | -2.243769 |

-----  
**Q<sub>mutated</sub>-TS(B-C)<sub>Ir(Me)</sub>**  
 -----  
 -----

Number of imaginary frequencies: 12    Electronic energy:    HF=-4961.52424788  
 Zero-point correction=                    2.251588 (Hartree/Particle)  
 Thermal correction to Energy=            2.387470  
 Thermal correction to Enthalpy=         2.388414  
 Thermal correction to Gibbs Free Energy= 2.029536  
 Sum of electronic and zero-point Energies= -4959.272660  
 Sum of electronic and thermal Energies= -4959.136778  
 Sum of electronic and thermal Enthalpies= -4959.135834  
 Sum of electronic and thermal Free Energies= -4959.494712

.....  
 Cartesian Coordinates  
 .....

|   |           |           |           |
|---|-----------|-----------|-----------|
| 6 | -3.859231 | -4.293849 | -4.432443 |
| 6 | -4.774232 | -5.506741 | -4.643457 |
| 6 | -6.166742 | -5.179657 | -5.219520 |
| 6 | -6.924195 | -6.471345 | -5.562889 |
| 6 | -7.001400 | -4.300417 | -4.275573 |
| 6 | -4.026869 | 6.859658  | -3.836662 |
| 6 | -5.291913 | 6.189823  | -3.317680 |
| 8 | -6.315480 | 6.808609  | -3.049143 |
| 6 | -3.462470 | 7.960700  | -2.900561 |
| 6 | -4.343976 | 9.218077  | -2.869657 |
| 6 | -3.200822 | 7.422508  | -1.485475 |
| 7 | -5.209488 | 4.828276  | -3.141534 |
| 6 | -6.379315 | 4.050384  | -2.746574 |
| 6 | -6.656109 | 4.066084  | -1.228362 |
| 8 | -7.747063 | 3.711769  | -0.800264 |
| 6 | -6.256809 | 2.601870  | -3.233125 |
| 7 | -5.611062 | 4.449026  | -0.443345 |
| 6 | -5.681045 | 4.478081  | 1.004114  |
| 6 | -4.932310 | 3.306593  | 1.680577  |
| 6 | -5.519300 | 1.949302  | 1.358004  |
| 6 | -4.945000 | 1.122626  | 0.383256  |
| 6 | -6.682780 | 1.508033  | 2.005774  |
| 6 | -5.519875 | -0.110207 | 0.061623  |
| 6 | -7.259272 | 0.277904  | 1.688251  |
| 6 | -6.678178 | -0.536018 | 0.712821  |
| 6 | 0.989327  | 4.281734  | -4.719278 |
| 6 | 1.960390  | 4.617671  | -3.603089 |
| 8 | 1.830462  | 4.196023  | -2.454553 |

|   |           |           |           |
|---|-----------|-----------|-----------|
| 6 | -0.440457 | 4.085013  | -4.207021 |
| 7 | 3.008202  | 5.399406  | -3.971743 |
| 6 | 4.088003  | 5.657553  | -3.045846 |
| 6 | 3.113021  | 7.682086  | 1.746394  |
| 6 | 2.025813  | 7.530371  | 0.679070  |
| 6 | -0.683655 | 4.368300  | 6.685223  |
| 6 | -2.089117 | 3.960067  | 7.149519  |
| 6 | -2.615939 | 4.917482  | 8.228162  |
| 6 | -3.060664 | 3.881269  | 5.962140  |
| 6 | -5.854491 | -1.356691 | 6.028060  |
| 6 | -5.674975 | 0.145538  | 5.845892  |
| 8 | -4.261500 | 0.389189  | 5.875030  |
| 6 | -6.390817 | 0.953401  | 6.930483  |
| 6 | 4.370480  | -1.747141 | 4.848379  |
| 6 | 5.498848  | -1.873977 | 3.808286  |
| 6 | 6.396946  | -0.654783 | 3.770823  |
| 6 | 7.502744  | -0.549181 | 4.626773  |
| 6 | 6.122150  | 0.415054  | 2.906755  |
| 6 | 8.307261  | 0.591501  | 4.627201  |
| 6 | 6.925277  | 1.557941  | 2.900775  |
| 6 | 8.019578  | 1.651407  | 3.764237  |
| 6 | 6.285785  | -1.175279 | -3.126893 |
| 6 | 7.354589  | -0.105362 | -3.026116 |
| 8 | 7.212305  | 1.010786  | -3.522852 |
| 7 | 8.484157  | -0.475118 | -2.354919 |
| 6 | 9.573589  | 0.453870  | -2.093203 |
| 6 | 9.339177  | 1.338738  | -0.858781 |
| 6 | 10.461443 | 2.361882  | -0.593486 |
| 6 | 10.027090 | 3.360547  | 0.490031  |
| 6 | 11.790003 | 1.692297  | -0.205117 |
| 6 | -0.079320 | -4.808013 | 1.124601  |
| 6 | 1.188751  | -0.562562 | 3.080499  |
| 6 | 2.561807  | 1.041684  | -1.286975 |
| 6 | 1.436813  | -3.265879 | -3.209450 |
| 7 | 0.560393  | -2.525525 | 1.754185  |
| 6 | 0.120524  | -3.789522 | 2.051415  |
| 6 | -0.058374 | -3.921527 | 3.493173  |
| 6 | 0.293933  | -2.717379 | 4.042471  |
| 6 | 0.696197  | -1.855019 | 2.940868  |
| 6 | 0.301828  | -2.315271 | 5.487712  |
| 6 | -0.529063 | -5.163375 | 4.198221  |
| 6 | -2.063713 | -5.320249 | 4.254561  |
| 6 | -2.499673 | -6.611930 | 4.953169  |
| 7 | 1.675756  | -0.045239 | 0.728734  |
| 6 | 1.665717  | 0.269979  | 2.068325  |
| 6 | 2.246158  | 1.581792  | 2.270780  |
| 6 | 2.621068  | 2.046261  | 1.027724  |
| 6 | 2.264321  | 1.007882  | 0.070126  |
| 6 | 2.357030  | 2.278838  | 3.592760  |
| 6 | 3.229995  | 3.320576  | 0.653490  |

|   |           |            |           |
|---|-----------|------------|-----------|
| 6 | 4.097895  | 4.028251   | 1.395493  |
| 7 | 1.756121  | -1.180047  | -1.964061 |
| 6 | 2.363193  | 0.023934   | -2.220011 |
| 6 | 2.828724  | 0.057659   | -3.590194 |
| 6 | 2.493900  | -1.156748  | -4.153534 |
| 6 | 1.840607  | -1.935694  | -3.104189 |
| 6 | 3.551605  | 1.206781   | -4.229723 |
| 6 | 2.774229  | -1.542539  | -5.535306 |
| 6 | 2.072576  | -2.365433  | -6.332369 |
| 7 | 0.630187  | -3.667870  | -0.925163 |
| 6 | 0.871317  | -4.059415  | -2.216071 |
| 6 | 0.496858  | -5.455239  | -2.379433 |
| 6 | 0.053195  | -5.891933  | -1.158375 |
| 6 | 0.171504  | -4.762490  | -0.246095 |
| 6 | 0.612846  | -6.225706  | -3.661364 |
| 6 | -0.414534 | -7.267762  | -0.774527 |
| 6 | 0.695402  | -8.160723  | -0.177894 |
| 6 | 0.189726  | -9.552222  | 0.214866  |
| 1 | -6.741968 | 4.447824   | 1.265242  |
| 1 | -5.267766 | 5.428839   | 1.363888  |
| 1 | -4.272697 | 7.308998   | -4.807477 |
| 1 | -3.244865 | 6.110594   | -4.019142 |
| 1 | -0.289904 | 3.670940   | 5.935773  |
| 1 | -0.696115 | 5.369012   | 6.233659  |
| 1 | 0.020884  | 4.391158   | 7.524956  |
| 1 | -6.914895 | -1.627943  | 5.987181  |
| 1 | -5.327277 | -1.905313  | 5.240933  |
| 1 | -5.449769 | -1.673018  | 6.996281  |
| 1 | -2.866125 | -4.608621  | -4.090275 |
| 1 | -3.728358 | -3.734878  | -5.368227 |
| 1 | -4.259861 | -3.601841  | -3.684037 |
| 1 | 2.996767  | 8.617784   | 2.306083  |
| 1 | 3.079617  | 6.855772   | 2.464882  |
| 1 | 4.114506  | 7.689466   | 1.299343  |
| 1 | 3.737349  | -2.641776  | 4.845526  |
| 1 | 4.778452  | -1.615626  | 5.857651  |
| 1 | 3.735395  | -0.883982  | 4.624696  |
| 1 | 4.756495  | 6.407746   | -3.475637 |
| 1 | 3.685613  | 6.039908   | -2.104059 |
| 1 | 4.666547  | 4.751403   | -2.826824 |
| 1 | 1.341307  | 3.351783   | -5.187269 |
| 1 | 1.021685  | 5.053633   | -5.499134 |
| 1 | 5.412972  | -0.877736  | -2.536890 |
| 1 | 6.616594  | -2.160753  | -2.783198 |
| 1 | 9.675521  | 1.085183   | -2.981429 |
| 1 | 10.492288 | -0.133805  | -1.993542 |
| 1 | 0.996105  | -10.166373 | 0.631698  |
| 1 | -0.604575 | -9.488618  | 0.969313  |
| 1 | -0.221229 | -10.085345 | -0.651697 |
| 1 | -3.591824 | -6.698255  | 4.987829  |

|   |           |           |           |
|---|-----------|-----------|-----------|
| 1 | -2.112382 | -7.495953 | 4.431081  |
| 1 | -2.129661 | -6.650839 | 5.985396  |
| 1 | -4.901023 | -6.041416 | -3.689698 |
| 1 | -4.274275 | -6.213219 | -5.320845 |
| 1 | -6.014244 | -4.620023 | -6.156077 |
| 1 | -7.900747 | -6.253494 | -6.011509 |
| 1 | -6.359781 | -7.090552 | -6.270625 |
| 1 | -7.100618 | -7.073143 | -4.661460 |
| 1 | -7.986846 | -4.087922 | -4.706867 |
| 1 | -7.162837 | -4.805538 | -3.313734 |
| 1 | -6.518121 | -3.339261 | -4.070050 |
| 1 | -2.491459 | 8.243972  | -3.332444 |
| 1 | -3.887531 | 9.989803  | -2.237942 |
| 1 | -4.465761 | 9.637166  | -3.875915 |
| 1 | -5.340033 | 8.988727  | -2.482738 |
| 1 | -2.708190 | 8.180290  | -0.865798 |
| 1 | -4.142044 | 7.153491  | -0.989959 |
| 1 | -2.551323 | 6.537478  | -1.502581 |
| 1 | -4.399405 | 4.334651  | -3.491315 |
| 1 | -7.259806 | 4.519920  | -3.194876 |
| 1 | -7.132903 | 2.037731  | -2.904876 |
| 1 | -6.199889 | 2.563898  | -4.326714 |
| 1 | -5.367111 | 2.115526  | -2.814587 |
| 1 | -4.766166 | 4.752647  | -0.906212 |
| 1 | -4.959543 | 3.482974  | 2.765024  |
| 1 | -3.875754 | 3.338195  | 1.384685  |
| 1 | -4.039545 | 1.436790  | -0.130462 |
| 1 | -7.150275 | 2.142684  | 2.756226  |
| 1 | -5.052417 | -0.741256 | -0.688788 |
| 1 | -8.164908 | -0.041622 | 2.197635  |
| 1 | -7.121422 | -1.496680 | 0.465307  |
| 1 | -1.098110 | 3.756051  | -5.018892 |
| 1 | -0.459105 | 3.336357  | -3.410562 |
| 1 | -0.840570 | 5.019532  | -3.796347 |
| 1 | 3.127099  | 5.636165  | -4.945570 |
| 1 | 1.025272  | 7.547178  | 1.126900  |
| 1 | -2.021093 | 2.955602  | 7.593230  |
| 1 | -3.605217 | 4.610173  | 8.588368  |
| 1 | -1.941075 | 4.953067  | 9.091522  |
| 1 | -2.706603 | 5.938496  | 7.834489  |
| 1 | -4.063480 | 3.577268  | 6.291476  |
| 1 | -3.163131 | 4.857048  | 5.469685  |
| 1 | -2.708676 | 3.168940  | 5.204205  |
| 1 | -6.076250 | 0.432450  | 4.860305  |
| 1 | -4.123564 | 1.341864  | 5.755379  |
| 1 | -6.243578 | 2.031190  | 6.782102  |
| 1 | -7.470547 | 0.763768  | 6.917552  |
| 1 | -6.001825 | 0.689227  | 7.920463  |
| 1 | 5.053592  | -2.037102 | 2.819383  |
| 1 | 6.098174  | -2.765359 | 4.035290  |

|   |           |           |           |
|---|-----------|-----------|-----------|
| 1 | 7.736003  | -1.372724 | 5.299146  |
| 1 | 5.271282  | 0.352919  | 2.231776  |
| 1 | 9.159967  | 0.651421  | 5.299187  |
| 1 | 6.695474  | 2.370838  | 2.216963  |
| 1 | 8.642291  | 2.542358  | 3.764610  |
| 1 | 8.486901  | -1.363589 | -1.875258 |
| 1 | 9.203119  | 0.705853  | 0.030415  |
| 1 | 8.393122  | 1.871491  | -1.013758 |
| 1 | 10.625651 | 2.927069  | -1.524320 |
| 1 | 12.565422 | 2.443721  | -0.013900 |
| 1 | 11.672336 | 1.096849  | 0.709992  |
| 1 | 12.166871 | 1.027409  | -0.990524 |
| 1 | -0.433675 | -5.754581 | 1.517395  |
| 1 | 1.243665  | -0.174104 | 4.091708  |
| 1 | 3.037935  | 1.943164  | -1.651095 |
| 1 | 1.625805  | -3.751350 | -4.158694 |
| 1 | 1.287421  | -1.949246 | 5.801948  |
| 1 | -0.419179 | -1.512500 | 5.691848  |
| 1 | 0.041748  | -3.157136 | 6.136389  |
| 1 | -0.138105 | -5.171710 | 5.224017  |
| 1 | -0.100932 | -6.050987 | 3.712292  |
| 1 | -2.468283 | -5.288351 | 3.235351  |
| 1 | -2.489013 | -4.453113 | 4.777670  |
| 1 | 2.382912  | 3.364298  | 3.453356  |
| 1 | 1.509276  | 2.042155  | 4.246231  |
| 1 | 3.272362  | 1.998442  | 4.132065  |
| 1 | 2.939745  | 3.714044  | -0.320518 |
| 1 | 4.488719  | 4.977170  | 1.039781  |
| 1 | 4.464307  | 3.683072  | 2.357851  |
| 1 | 3.427775  | 1.196527  | -5.317598 |
| 1 | 3.170502  | 2.163161  | -3.859461 |
| 1 | 4.631133  | 1.187633  | -4.021371 |
| 1 | 3.651348  | -1.062201 | -5.969877 |
| 1 | 2.395958  | -2.558799 | -7.351200 |
| 1 | 1.155481  | -2.852222 | -6.015766 |
| 1 | 0.178852  | -7.225620 | -3.565679 |
| 1 | 0.098595  | -5.720514 | -4.489153 |
| 1 | 1.660148  | -6.352206 | -3.966733 |
| 1 | -0.833944 | -7.771824 | -1.655255 |
| 1 | -1.240205 | -7.194356 | -0.053335 |
| 1 | 1.129278  | -7.659751 | 0.697058  |
| 1 | 1.508977  | -8.251090 | -0.909398 |
| 1 | 9.826701  | 2.843809  | 1.437386  |
| 1 | 10.805947 | 4.110310  | 0.675041  |
| 1 | 9.111748  | 3.889502  | 0.199184  |
| 6 | -1.067880 | -1.178643 | -0.544786 |
| 6 | -2.170133 | -2.070084 | -0.049855 |
| 6 | -2.686253 | -3.055565 | -0.912759 |
| 6 | -2.696377 | -2.022846 | 1.268297  |
| 6 | -3.661541 | -3.963581 | -0.501996 |

|    |           |           |           |
|----|-----------|-----------|-----------|
| 1  | -2.286010 | -3.132254 | -1.914512 |
| 6  | -3.705471 | -2.908558 | 1.663226  |
| 6  | -4.180443 | -3.883085 | 0.787268  |
| 1  | -4.012621 | -4.721525 | -1.195985 |
| 1  | -4.115136 | -2.840729 | 2.663639  |
| 1  | -4.954473 | -4.570237 | 1.118472  |
| 6  | -1.446992 | -0.569579 | -1.894398 |
| 8  | -1.939160 | 0.533405  | -2.058728 |
| 8  | -1.205718 | -1.421604 | -2.902254 |
| 6  | -1.765698 | -1.061361 | -4.196436 |
| 1  | -1.790581 | -2.012690 | -4.731911 |
| 1  | -2.789673 | -0.711582 | -4.037186 |
| 6  | -0.945146 | -0.024219 | -4.946137 |
| 1  | -0.942683 | 0.926623  | -4.409367 |
| 1  | 0.085027  | -0.359280 | -5.086031 |
| 1  | -1.393801 | 0.133474  | -5.935050 |
| 8  | -2.202332 | -1.065357 | 2.091144  |
| 6  | -2.878655 | -0.760258 | 3.307078  |
| 1  | -3.929633 | -0.515854 | 3.124309  |
| 1  | -2.803025 | -1.585481 | 4.023005  |
| 1  | -2.367137 | 0.109463  | 3.718802  |
| 7  | -1.293758 | 0.411035  | 0.355339  |
| 7  | -0.805606 | 1.318918  | 0.772608  |
| 77 | 1.077837  | -1.816317 | -0.112685 |
| 6  | 3.018936  | -2.594213 | 0.169219  |
| 1  | 3.735990  | -1.770473 | 0.266282  |
| 1  | 3.052154  | -3.208737 | 1.076030  |
| 1  | 3.305985  | -3.212333 | -0.688114 |
| 1  | 5.961099  | -1.256219 | -4.167797 |
| 1  | 2.070970  | 8.343048  | -0.055956 |
| 1  | 2.124363  | 6.581897  | 0.138545  |

---

**Q<sub>mutated</sub>-C<sub>Ir</sub>(Me)**

---

Number of imaginary frequencies: 11    Electronic energy:    HF=-4961.56752721  
Zero-point correction=                    2.250725 (Hartree/Particle)  
Thermal correction to Energy=            2.388618  
Thermal correction to Enthalpy=         2.389562  
Thermal correction to Gibbs Free Energy=    2.026673  
Sum of electronic and zero-point Energies=    -4959.316803  
Sum of electronic and thermal Energies=    -4959.178909  
Sum of electronic and thermal Enthalpies=    -4959.177965  
Sum of electronic and thermal Free Energies=    -4959.540854

.....  
Cartesian Coordinates

.....  
6    2.449730    5.007372    -4.461189  
6    3.002234    6.309939    -5.053494  
6    4.378538    6.738907    -4.505202  
6    4.952868    7.899014    -5.332643

|   |           |           |           |
|---|-----------|-----------|-----------|
| 6 | 4.323633  | 7.117135  | -3.016828 |
| 6 | 6.657689  | -5.286618 | -3.418721 |
| 6 | 7.600391  | -4.178979 | -2.967792 |
| 8 | 8.794876  | -4.358445 | -2.758308 |
| 6 | 6.671675  | -6.544151 | -2.510997 |
| 6 | 7.969984  | -7.354336 | -2.643228 |
| 6 | 6.376985  | -6.189130 | -1.045473 |
| 7 | 7.014717  | -2.947852 | -2.791567 |
| 6 | 7.802685  | -1.776463 | -2.428196 |
| 6 | 7.992408  | -1.595609 | -0.907065 |
| 8 | 8.800679  | -0.776575 | -0.484965 |
| 6 | 7.197000  | -0.499467 | -3.022102 |
| 7 | 7.197469  | -2.365969 | -0.115184 |
| 6 | 7.232993  | -2.298034 | 1.332363  |
| 6 | 5.993892  | -1.620681 | 1.954609  |
| 6 | 5.773788  | -0.195828 | 1.487402  |
| 6 | 4.656007  | 0.143561  | 0.714241  |
| 6 | 6.700703  | 0.814785  | 1.795598  |
| 6 | 4.462027  | 1.450294  | 0.258418  |
| 6 | 6.510837  | 2.122838  | 1.344125  |
| 6 | 5.389213  | 2.444696  | 0.574521  |
| 6 | 1.066481  | -4.751217 | -4.436288 |
| 6 | 0.182215  | -5.289784 | -3.331237 |
| 8 | -0.042723 | -4.652655 | -2.302418 |
| 6 | 2.251241  | -3.943683 | -3.898708 |
| 7 | -0.361002 | -6.507039 | -3.591658 |
| 6 | -1.350339 | -7.109960 | -2.732019 |
| 6 | 0.191158  | -8.462131 | 2.150094  |
| 6 | 1.476633  | -7.631641 | 2.195042  |
| 6 | 2.450643  | -3.824129 | 6.989173  |
| 6 | 2.978284  | -2.380485 | 6.950515  |
| 6 | 4.076507  | -2.166180 | 8.002252  |
| 6 | 3.477997  | -2.003908 | 5.546987  |
| 6 | 5.165712  | 3.373406  | 6.121434  |
| 6 | 5.844274  | 2.421744  | 5.141957  |
| 8 | 4.809721  | 1.634809  | 4.539878  |
| 6 | 6.882821  | 1.526179  | 5.822426  |
| 6 | -4.482869 | -0.041675 | 4.863727  |
| 6 | -5.607260 | -0.488887 | 3.911155  |
| 6 | -5.744594 | -1.995654 | 3.837021  |
| 6 | -6.626079 | -2.682973 | 4.683061  |
| 6 | -4.962944 | -2.743687 | 2.944137  |
| 6 | -6.723006 | -4.075385 | 4.644661  |
| 6 | -5.056549 | -4.136076 | 2.899823  |
| 6 | -5.936257 | -4.807689 | 3.752956  |
| 6 | -5.885805 | -1.550759 | -3.094978 |
| 6 | -6.496582 | -2.933089 | -2.968753 |
| 8 | -5.945784 | -3.935128 | -3.420602 |
| 7 | -7.700154 | -2.977644 | -2.323452 |
| 6 | -8.376606 | -4.230083 | -2.016710 |



|   |            |           |           |
|---|------------|-----------|-----------|
| 6 | -7.863865  | -4.899567 | -0.731758 |
| 6 | -8.545844  | -6.241865 | -0.400866 |
| 6 | -7.788119  | -6.961070 | 0.725694  |
| 6 | -10.028205 | -6.072699 | -0.029267 |
| 6 | -2.632335  | 4.804515  | 0.866697  |
| 6 | -1.266616  | 0.684884  | 3.018855  |
| 6 | -1.722674  | -1.678382 | -1.198153 |
| 6 | -2.979196  | 2.472094  | -3.373941 |
| 7 | -1.891041  | 2.586130  | 1.606476  |
| 6 | -2.197568  | 3.901990  | 1.832653  |
| 6 | -2.039572  | 4.202092  | 3.250779  |
| 6 | -1.654301  | 3.035673  | 3.857361  |
| 6 | -1.576326  | 2.024602  | 2.813121  |
| 6 | -1.370632  | 2.785130  | 5.308946  |
| 6 | -2.243518  | 5.553830  | 3.874852  |
| 6 | -1.012816  | 6.480507  | 3.765788  |
| 6 | -1.256624  | 7.861827  | 4.381087  |
| 7 | -1.527072  | -0.172007 | 0.731617  |
| 6 | -1.261122  | -0.334354 | 2.066570  |
| 6 | -1.018622  | -1.734303 | 2.348617  |
| 6 | -1.163614  | -2.411412 | 1.155180  |
| 6 | -1.474434  | -1.408765 | 0.143874  |
| 6 | -0.653513  | -2.290216 | 3.691373  |
| 6 | -1.036426  | -3.840109 | 0.877383  |
| 6 | -1.343640  | -4.834982 | 1.726661  |
| 7 | -2.192664  | 0.594299  | -2.007759 |
| 6 | -2.069735  | -0.759509 | -2.189432 |
| 6 | -2.383952  | -1.095511 | -3.562429 |
| 6 | -2.684796  | 0.089023  | -4.202185 |
| 6 | -2.599223  | 1.141941  | -3.194103 |
| 6 | -2.389840  | -2.482886 | -4.132956 |
| 6 | -3.022576  | 0.222580  | -5.618295 |
| 6 | -2.736504  | 1.249704  | -6.434981 |
| 7 | -2.642284  | 3.351021  | -1.105205 |
| 6 | -3.009176  | 3.483709  | -2.417074 |
| 6 | -3.459889  | 4.845258  | -2.652485 |
| 6 | -3.359381  | 5.510493  | -1.456449 |
| 6 | -2.852455  | 4.550239  | -0.487334 |
| 6 | -3.943602  | 5.366175  | -3.973200 |
| 6 | -3.736482  | 6.932025  | -1.146932 |
| 6 | -5.159219  | 7.085311  | -0.565802 |
| 6 | -5.516448  | 8.540849  | -0.249797 |
| 1 | 8.139738   | -1.744683 | 1.588600  |
| 1 | 7.332768   | -3.311793 | 1.740987  |
| 1 | 6.959135   | -5.577183 | -4.433849 |
| 1 | 5.629829   | -4.906221 | -3.488857 |
| 1 | 1.642101   | -3.973170 | 6.263294  |
| 1 | 3.249575   | -4.538200 | 6.748556  |
| 1 | 2.062831   | -4.081193 | 7.982370  |
| 1 | 5.902345   | 4.021695  | 6.608509  |

|   |           |           |           |
|---|-----------|-----------|-----------|
| 1 | 4.436123  | 4.002466  | 5.601153  |
| 1 | 4.636909  | 2.806371  | 6.896570  |
| 1 | 1.489338  | 4.746067  | -4.921585 |
| 1 | 3.141960  | 4.174179  | -4.638159 |
| 1 | 2.286412  | 5.077270  | -3.381478 |
| 1 | 0.389715  | -9.520166 | 2.358059  |
| 1 | -0.536254 | -8.111473 | 2.891310  |
| 1 | -0.286974 | -8.404962 | 1.164678  |
| 1 | -4.408420 | 1.051649  | 4.889648  |
| 1 | -4.666090 | -0.399968 | 5.883771  |
| 1 | -3.517178 | -0.437051 | 4.533540  |
| 1 | -1.062423 | -8.131176 | -2.456609 |
| 1 | -1.418362 | -6.502776 | -1.828920 |
| 1 | -2.337052 | -7.138720 | -3.210701 |
| 1 | 0.436875  | -4.102191 | -5.061219 |
| 1 | 1.415415  | -5.563605 | -5.086664 |
| 1 | -5.008862 | -1.478322 | -2.444076 |
| 1 | -6.575374 | -0.741234 | -2.834106 |
| 1 | -8.213086 | -4.897643 | -2.868325 |
| 1 | -9.449980 | -4.020889 | -1.956678 |
| 1 | -6.530375 | 8.622385  | 0.158063  |
| 1 | -4.825482 | 8.969273  | 0.487146  |
| 1 | -5.467898 | 9.166783  | -1.149678 |
| 1 | -0.367883 | 8.497791  | 4.297616  |
| 1 | -2.084535 | 8.379721  | 3.880621  |
| 1 | -1.512127 | 7.784540  | 5.445375  |
| 1 | 2.283154  | 7.126016  | -4.885523 |
| 1 | 3.080785  | 6.196770  | -6.144086 |
| 1 | 5.060225  | 5.880214  | -4.611566 |
| 1 | 5.944976  | 8.194407  | -4.970625 |
| 1 | 5.048507  | 7.627407  | -6.390933 |
| 1 | 4.302302  | 8.781793  | -5.273282 |
| 1 | 5.317827  | 7.394534  | -2.646180 |
| 1 | 3.660880  | 7.979537  | -2.861587 |
| 1 | 3.953778  | 6.297401  | -2.391928 |
| 1 | 5.846685  | -7.175758 | -2.872117 |
| 1 | 7.918675  | -8.261889 | -2.029497 |
| 1 | 8.136636  | -7.662025 | -3.682863 |
| 1 | 8.833180  | -6.763133 | -2.328057 |
| 1 | 6.296930  | -7.095207 | -0.434141 |
| 1 | 7.182232  | -5.576110 | -0.622399 |
| 1 | 5.433042  | -5.637746 | -0.945486 |
| 1 | 6.051420  | -2.815193 | -3.068081 |
| 1 | 8.810559  | -1.930099 | -2.823937 |
| 1 | 7.805597  | 0.357309  | -2.724290 |
| 1 | 7.169405  | -0.555147 | -4.115643 |
| 1 | 6.178771  | -0.332835 | -2.648449 |
| 1 | 6.578327  | -3.022944 | -0.568267 |
| 1 | 6.116565  | -1.651550 | 3.046644  |
| 1 | 5.102570  | -2.219093 | 1.729639  |

|   |            |           |           |
|---|------------|-----------|-----------|
| 1 | 3.920456   | -0.616496 | 0.463420  |
| 1 | 7.593412   | 0.570654  | 2.366846  |
| 1 | 3.581633   | 1.674157  | -0.334321 |
| 1 | 7.246659   | 2.886147  | 1.583816  |
| 1 | 5.238954   | 3.462475  | 0.224668  |
| 1 | 2.806891   | -3.479836 | -4.720594 |
| 1 | 1.897578   | -3.159851 | -3.224294 |
| 1 | 2.939965   | -4.584225 | -3.335650 |
| 1 | -0.161505  | -6.941623 | -4.480773 |
| 1 | 1.953857   | -7.691682 | 3.180113  |
| 1 | 2.140852   | -1.710890 | 7.199155  |
| 1 | 4.433484   | -1.129126 | 7.999393  |
| 1 | 3.714798   | -2.395177 | 9.012151  |
| 1 | 4.939542   | -2.815578 | 7.803163  |
| 1 | 3.820328   | -0.962468 | 5.501839  |
| 1 | 4.318875   | -2.646606 | 5.251014  |
| 1 | 2.687375   | -2.131292 | 4.797006  |
| 1 | 6.345102   | 3.018039  | 4.362721  |
| 1 | 5.185106   | 1.211361  | 3.748592  |
| 1 | 7.346345   | 0.846454  | 5.097412  |
| 1 | 7.680997   | 2.120926  | 6.282999  |
| 1 | 6.407127   | 0.918670  | 6.601030  |
| 1 | -5.405943  | -0.085330 | 2.911208  |
| 1 | -6.556780  | -0.049592 | 4.243318  |
| 1 | -7.245313  | -2.119028 | 5.378165  |
| 1 | -4.274851  | -2.230387 | 2.276037  |
| 1 | -7.414393  | -4.587538 | 5.309490  |
| 1 | -4.441810  | -4.691967 | 2.196750  |
| 1 | -6.008297  | -5.891818 | 3.721993  |
| 1 | -8.029620  | -2.135978 | -1.872935 |
| 1 | -7.983762  | -4.210406 | 0.117092  |
| 1 | -6.786056  | -5.060828 | -0.855231 |
| 1 | -8.491657  | -6.875919 | -1.299748 |
| 1 | -10.486214 | -7.041395 | 0.203846  |
| 1 | -10.136038 | -5.433151 | 0.856828  |
| 1 | -10.612263 | -5.622190 | -0.839802 |
| 1 | -2.840271  | 5.812811  | 1.206837  |
| 1 | -1.042672  | 0.393247  | 4.039045  |
| 1 | -1.653823  | -2.715640 | -1.503483 |
| 1 | -3.340877  | 2.735766  | -4.360070 |
| 1 | -2.003348  | 1.984511  | 5.712649  |
| 1 | -0.327972  | 2.483561  | 5.474932  |
| 1 | -1.550476  | 3.681246  | 5.910156  |
| 1 | -2.502643  | 5.434782  | 4.934813  |
| 1 | -3.106779  | 6.053331  | 3.413850  |
| 1 | -0.729072  | 6.582473  | 2.710765  |
| 1 | -0.160983  | 5.996001  | 4.260909  |
| 1 | -0.091852  | -3.223302 | 3.580240  |
| 1 | -0.035123  | -1.589310 | 4.263318  |
| 1 | -1.540139  | -2.515454 | 4.300018  |

|    |           |           |           |
|----|-----------|-----------|-----------|
| 1  | -0.669713 | -4.107628 | -0.111937 |
| 1  | -1.209241 | -5.872786 | 1.435437  |
| 1  | -1.760725 | -4.658466 | 2.713512  |
| 1  | -2.241848 | -2.464705 | -5.217728 |
| 1  | -1.596134 | -3.094173 | -3.693030 |
| 1  | -3.341871 | -2.998458 | -3.938999 |
| 1  | -3.531255 | -0.637778 | -6.053995 |
| 1  | -3.034203 | 1.229541  | -7.479485 |
| 1  | -2.184733 | 2.123980  | -6.102983 |
| 1  | -4.129188 | 6.443646  | -3.932753 |
| 1  | -3.213871 | 5.186669  | -4.772904 |
| 1  | -4.880732 | 4.883907  | -4.281251 |
| 1  | -3.661934 | 7.538885  | -2.058707 |
| 1  | -3.014696 | 7.366426  | -0.441535 |
| 1  | -5.244987 | 6.473441  | 0.341432  |
| 1  | -5.880882 | 6.669644  | -1.281013 |
| 1  | -7.778850 | -6.354243 | 1.640193  |
| 1  | -8.254061 | -7.924535 | 0.966024  |
| 1  | -6.745697 | -7.151237 | 0.443798  |
| 6  | -0.085328 | 2.144120  | -0.704383 |
| 6  | 0.606316  | 3.379969  | -0.263867 |
| 6  | 0.575557  | 4.521475  | -1.079576 |
| 6  | 1.287568  | 3.445661  | 0.976541  |
| 6  | 1.144635  | 5.725624  | -0.658049 |
| 1  | 0.067563  | 4.465352  | -2.036668 |
| 6  | 1.883181  | 4.646690  | 1.381269  |
| 6  | 1.799379  | 5.781930  | 0.570742  |
| 1  | 1.079874  | 6.605328  | -1.291508 |
| 1  | 2.415008  | 4.698300  | 2.323895  |
| 1  | 2.261131  | 6.707568  | 0.904161  |
| 6  | 0.724537  | 1.472297  | -1.756846 |
| 8  | 1.566083  | 0.650901  | -1.431491 |
| 8  | 0.505243  | 1.885594  | -3.015030 |
| 6  | 1.432041  | 1.398221  | -4.026046 |
| 1  | 1.385407  | 2.158819  | -4.807646 |
| 1  | 2.435792  | 1.388744  | -3.593222 |
| 6  | 1.049187  | 0.027213  | -4.558200 |
| 1  | 1.092862  | -0.720908 | -3.762539 |
| 1  | 0.040756  | 0.036276  | -4.979721 |
| 1  | 1.754048  | -0.261370 | -5.348023 |
| 8  | 1.354223  | 2.286386  | 1.675559  |
| 6  | 2.037952  | 2.277950  | 2.924142  |
| 1  | 3.097713  | 2.521171  | 2.808805  |
| 1  | 1.572730  | 2.973183  | 3.634513  |
| 1  | 1.948382  | 1.259925  | 3.302691  |
| 7  | 2.542580  | -3.749013 | 0.183726  |
| 7  | 3.431542  | -3.560839 | -0.445486 |
| 77 | -1.960134 | 1.603240  | -0.208717 |
| 6  | -4.056089 | 1.237747  | 0.117165  |
| 1  | -4.195235 | 0.220537  | 0.505116  |

|   |           |           |           |
|---|-----------|-----------|-----------|
| 1 | -4.467482 | 1.952820  | 0.839186  |
| 1 | -4.614045 | 1.327730  | -0.821881 |
| 1 | -5.543095 | -1.405516 | -4.122222 |
| 1 | 2.203989  | -7.983350 | 1.453747  |
| 1 | 1.273229  | -6.574988 | 1.987836  |

---

**Q-<sup>5</sup>A<sub>Fe(cys)</sub>**

---

Number of imaginary frequencies: 8    Electronic energy:    HF=-4730.3868925  
Zero-point correction=                    2.046588 (Hartree/Particle)  
Thermal correction to Energy=            2.169481  
Thermal correction to Enthalpy=         2.170425  
Thermal correction to Gibbs Free Energy= 1.842507  
Sum of electronic and zero-point Energies= -4728.340304  
Sum of electronic and thermal Energies= -4728.217412  
Sum of electronic and thermal Enthalpies= -4728.216468  
Sum of electronic and thermal Free Energies= -4728.544385

.....  
Cartesian Coordinates

.....  

|   |           |           |           |
|---|-----------|-----------|-----------|
| 6 | -4.000396 | -6.261679 | 4.760397  |
| 6 | -4.766631 | -6.147920 | 3.436758  |
| 6 | -4.831229 | -4.726994 | 2.840743  |
| 6 | -5.449686 | -4.758341 | 1.434498  |
| 6 | -5.597597 | -3.747047 | 3.742647  |
| 6 | -6.876632 | -1.430399 | -4.892552 |
| 6 | -7.862781 | -0.900305 | -3.867448 |
| 8 | -8.489250 | 0.153995  | -4.038126 |
| 6 | -5.510864 | -0.695618 | -4.955829 |
| 6 | -5.645094 | 0.779210  | -5.358638 |
| 6 | -4.709267 | -0.857846 | -3.659100 |
| 7 | -8.041563 | -1.661570 | -2.751959 |
| 6 | -9.041880 | -1.363702 | -1.722801 |
| 6 | -8.537653 | -0.313304 | -0.697698 |
| 8 | -8.482098 | -0.561032 | 0.506039  |
| 6 | -9.475174 | -2.649115 | -1.024287 |
| 7 | -8.193908 | 0.872349  | -1.259220 |
| 6 | -7.706984 | 2.010692  | -0.498027 |
| 6 | -6.283394 | 2.458978  | -0.858520 |
| 6 | -5.135244 | 1.523534  | -0.510769 |
| 6 | -3.863406 | 1.802210  | -1.038519 |
| 6 | -5.272100 | 0.416418  | 0.337487  |
| 6 | -2.757723 | 1.013082  | -0.723120 |
| 6 | -4.166095 | -0.384353 | 0.642014  |
| 6 | -2.905599 | -0.090466 | 0.121953  |
| 6 | -1.419038 | -2.931268 | -4.149160 |
| 6 | -0.797611 | -1.769435 | -4.900962 |
| 8 | -1.462148 | -0.955814 | -5.544983 |

|    |           |           |           |
|----|-----------|-----------|-----------|
| 6  | -1.416958 | -2.739135 | -2.620968 |
| 7  | 0.556483  | -1.720381 | -4.822424 |
| 6  | 1.309862  | -0.671990 | -5.470664 |
| 6  | 0.054020  | 4.460991  | -5.179622 |
| 6  | 0.648752  | 3.558182  | -4.104749 |
| 8  | 1.739803  | 2.860581  | -4.715962 |
| 6  | -0.375404 | 2.580971  | -3.521776 |
| 6  | -2.619308 | 7.504282  | 0.598519  |
| 6  | -2.578129 | 5.972317  | 0.671267  |
| 6  | -3.985385 | 5.392973  | 0.874791  |
| 6  | -1.906539 | 5.376358  | -0.573822 |
| 6  | -6.248765 | 4.381636  | 6.682971  |
| 6  | -5.987895 | 3.207752  | 5.743792  |
| 8  | -5.483725 | 2.146321  | 6.558748  |
| 6  | -5.008201 | 3.560886  | 4.622609  |
| 6  | 3.705822  | 3.765449  | 4.109955  |
| 6  | 5.245728  | 3.739778  | 4.134392  |
| 6  | 5.866204  | 4.497962  | 2.978547  |
| 6  | 6.276208  | 5.830011  | 3.132040  |
| 6  | 6.013482  | 3.892769  | 1.720747  |
| 6  | 6.818831  | 6.544914  | 2.062284  |
| 6  | 6.555025  | 4.605261  | 0.648746  |
| 6  | 6.959823  | 5.932786  | 0.814939  |
| 6  | 3.962688  | -1.284535 | 3.405567  |
| 6  | 4.459720  | -2.727595 | 3.357042  |
| 8  | 4.138365  | -3.544829 | 4.227341  |
| 6  | 4.833614  | -0.166662 | 2.812827  |
| 16 | 5.043942  | -0.151906 | 0.971266  |
| 7  | 5.231994  | -3.064034 | 2.296200  |
| 6  | 5.624823  | -4.441303 | 2.063215  |
| 6  | 6.274255  | -4.580243 | 0.682154  |
| 6  | 6.582459  | -6.028456 | 0.257373  |
| 6  | 7.061419  | -6.066455 | -1.202421 |
| 6  | 7.605556  | -6.711490 | 1.178981  |
| 26 | 2.823927  | -0.073562 | -0.089379 |
| 6  | 0.485702  | -1.523617 | 2.068256  |
| 6  | 1.613264  | 3.045476  | 0.900850  |
| 6  | 4.199016  | 1.450504  | -2.877781 |
| 6  | 2.977526  | -3.115628 | -1.781143 |
| 7  | 1.273240  | 0.635882  | 1.222408  |
| 6  | 0.573429  | -0.125083 | 2.114655  |
| 6  | -0.072894 | 0.729721  | 3.110233  |
| 6  | 0.232818  | 2.021494  | 2.761840  |
| 6  | 1.077689  | 1.942407  | 1.574642  |
| 6  | -0.197004 | 3.292789  | 3.432079  |
| 6  | -0.899554 | 0.264934  | 4.278143  |
| 6  | -2.376530 | -0.027579 | 3.942003  |
| 6  | -3.209374 | -0.369946 | 5.181955  |
| 7  | 2.809988  | 1.911931  | -0.911633 |
| 6  | 2.417737  | 3.038889  | -0.247326 |

|   |           |           |           |
|---|-----------|-----------|-----------|
| 6 | 2.953984  | 4.225646  | -0.898897 |
| 6 | 3.681384  | 3.775639  | -1.982361 |
| 6 | 3.576274  | 2.313443  | -1.965004 |
| 6 | 2.719186  | 5.640953  | -0.467317 |
| 6 | 4.369223  | 4.545281  | -3.016340 |
| 6 | 5.030840  | 5.701598  | -2.848688 |
| 7 | 3.403351  | -0.725073 | -2.058005 |
| 6 | 4.121334  | 0.050209  | -2.924774 |
| 6 | 4.768676  | -0.782652 | -3.921204 |
| 6 | 4.384714  | -2.084827 | -3.656362 |
| 6 | 3.534374  | -2.020172 | -2.460626 |
| 6 | 5.638914  | -0.277880 | -5.033957 |
| 6 | 4.785426  | -3.256317 | -4.431139 |
| 6 | 4.099200  | -4.391620 | -4.645282 |
| 7 | 1.824072  | -1.970343 | 0.065088  |
| 6 | 2.183076  | -3.093223 | -0.627191 |
| 6 | 1.618256  | -4.278491 | 0.010843  |
| 6 | 0.914774  | -3.836971 | 1.102751  |
| 6 | 1.054671  | -2.381197 | 1.116250  |
| 6 | 1.802071  | -5.690678 | -0.461589 |
| 6 | 0.199092  | -4.664808 | 2.133549  |
| 6 | 1.128636  | -5.184192 | 3.253161  |
| 6 | 0.373233  | -5.952919 | 4.341181  |
| 1 | 3.322679  | 3.315279  | 3.188989  |
| 1 | 3.292047  | 3.207655  | 4.958689  |
| 1 | 3.332756  | 4.795994  | 4.163105  |
| 1 | 3.788491  | -1.078694 | 4.470040  |
| 1 | 2.977768  | -1.267579 | 2.925986  |
| 1 | 4.740064  | -5.090601 | 2.136103  |
| 1 | 6.308298  | -4.767877 | 2.858296  |
| 1 | 1.059145  | -6.320471 | 5.112965  |
| 1 | -0.161853 | -6.818285 | 3.926966  |
| 1 | -0.369128 | -5.313064 | 4.836730  |
| 1 | -4.240195 | -0.631207 | 4.907611  |
| 1 | -3.242948 | 0.474382  | 5.883077  |
| 1 | -2.789983 | -1.227204 | 5.723507  |
| 1 | -3.948600 | -7.304809 | 5.094139  |
| 1 | -2.971124 | -5.898021 | 4.653764  |
| 1 | -4.476413 | -5.685089 | 5.561424  |
| 1 | -1.612860 | 7.926592  | 0.490522  |
| 1 | -3.213271 | 7.837559  | -0.263371 |
| 1 | -3.070455 | 7.937116  | 1.500257  |
| 1 | -0.885618 | -3.857769 | -4.402290 |
| 1 | -2.445200 | -3.032140 | -4.514162 |
| 1 | 2.367959  | -0.939580 | -5.451968 |
| 1 | 0.977872  | -0.576125 | -6.508991 |
| 1 | 1.184093  | 0.305618  | -4.993361 |
| 1 | -0.335880 | 3.858459  | -6.008637 |
| 1 | -0.766103 | 5.062768  | -4.771415 |
| 1 | 0.819716  | 5.135977  | -5.576767 |

|   |            |           |           |
|---|------------|-----------|-----------|
| 1 | -5.793055  | -6.522384 | 3.572073  |
| 1 | -4.296022  | -6.812894 | 2.698797  |
| 1 | -3.797028  | -4.361219 | 2.743948  |
| 1 | -5.460636  | -3.759049 | 0.982931  |
| 1 | -4.888787  | -5.423451 | 0.766557  |
| 1 | -6.487109  | -5.118033 | 1.471868  |
| 1 | -5.642296  | -2.749495 | 3.289440  |
| 1 | -6.631598  | -4.084985 | 3.895746  |
| 1 | -5.129932  | -3.641679 | 4.727504  |
| 1 | -6.694412  | -2.499701 | -4.722380 |
| 1 | -4.946823  | -1.202224 | -5.751143 |
| 1 | -4.651141  | 1.224558  | -5.475825 |
| 1 | -6.181768  | 0.886964  | -6.308940 |
| 1 | -6.195338  | 1.353075  | -4.605711 |
| 1 | -3.695527  | -0.470176 | -3.795949 |
| 1 | -5.169889  | -0.324521 | -2.819811 |
| 1 | -4.619061  | -1.915502 | -3.377321 |
| 1 | -7.430077  | -2.451392 | -2.596347 |
| 1 | -9.889631  | -0.916227 | -2.255638 |
| 1 | -10.242204 | -2.430818 | -0.277850 |
| 1 | -9.875452  | -3.361803 | -1.752948 |
| 1 | -8.634655  | -3.107974 | -0.492753 |
| 1 | -8.315338  | 0.958708  | -2.268116 |
| 1 | -7.784756  | 1.743553  | 0.558194  |
| 1 | -6.118776  | 3.423626  | -0.355413 |
| 1 | -6.246660  | 2.685082  | -1.933825 |
| 1 | -3.739933  | 2.650873  | -1.708528 |
| 1 | -6.239880  | 0.155585  | 0.754628  |
| 1 | -1.782337  | 1.253035  | -1.136058 |
| 1 | -4.296403  | -1.242864 | 1.297084  |
| 1 | -2.044136  | -0.702776 | 0.372332  |
| 1 | -1.911384  | -3.583797 | -2.127515 |
| 1 | -0.401720  | -2.669248 | -2.216208 |
| 1 | -1.950691  | -1.825876 | -2.339314 |
| 1 | 1.036747   | -2.305870 | -4.152585 |
| 1 | 1.035036   | 4.189781  | -3.289862 |
| 1 | 2.205196   | 2.372313  | -4.014992 |
| 1 | 0.090786   | 1.959574  | -2.747446 |
| 1 | -1.211035  | 3.122356  | -3.059434 |
| 1 | -0.773145  | 1.919702  | -4.300748 |
| 1 | -1.971297  | 5.692841  | 1.545819  |
| 1 | -3.959274  | 4.299525  | 0.943462  |
| 1 | -4.448113  | 5.781152  | 1.791035  |
| 1 | -4.639588  | 5.660548  | 0.033326  |
| 1 | -1.833404  | 4.285607  | -0.503184 |
| 1 | -2.479878  | 5.618530  | -1.479315 |
| 1 | -0.892386  | 5.771135  | -0.708747 |
| 1 | -6.933782  | 4.083206  | 7.483272  |
| 1 | -6.947181  | 2.901860  | 5.291285  |
| 1 | -5.293011  | 1.391155  | 5.980603  |



|   |           |           |           |
|---|-----------|-----------|-----------|
| 1 | -4.835652 | 2.701091  | 3.962969  |
| 1 | -5.392387 | 4.379323  | 4.002077  |
| 1 | -4.043345 | 3.866223  | 5.043610  |
| 1 | 5.581559  | 2.696028  | 4.109621  |
| 1 | 5.600714  | 4.163260  | 5.083509  |
| 1 | 6.172533  | 6.310164  | 4.103884  |
| 1 | 5.708697  | 2.857755  | 1.571978  |
| 1 | 7.135210  | 7.576016  | 2.204839  |
| 1 | 6.657137  | 4.119549  | -0.317586 |
| 1 | 7.387806  | 6.482500  | -0.020159 |
| 1 | 5.839219  | -0.209678 | 3.248903  |
| 1 | 4.392264  | 0.788349  | 3.116859  |
| 1 | 5.351713  | -2.364843 | 1.557380  |
| 1 | 7.200411  | -3.987167 | 0.652103  |
| 1 | 5.599344  | -4.133052 | -0.060330 |
| 1 | 5.642353  | -6.600105 | 0.316790  |
| 1 | 7.242326  | -7.096521 | -1.535398 |
| 1 | 6.325290  | -5.615528 | -1.878435 |
| 1 | 8.001059  | -5.509971 | -1.318253 |
| 1 | 7.816511  | -7.734565 | 0.842446  |
| 1 | 8.555234  | -6.159491 | 1.180262  |
| 1 | 7.252787  | -6.768624 | 2.214271  |
| 1 | -0.086878 | -1.995050 | 2.861208  |
| 1 | 1.378554  | 4.020223  | 1.317600  |
| 1 | 4.820321  | 1.920753  | -3.634300 |
| 1 | 3.213025  | -4.096598 | -2.177537 |
| 1 | 0.659098  | 3.935341  | 3.673365  |
| 1 | -0.868675 | 3.880942  | 2.791357  |
| 1 | -0.732634 | 3.093496  | 4.365928  |
| 1 | -0.867285 | 1.026666  | 5.068846  |
| 1 | -0.451336 | -0.636952 | 4.717956  |
| 1 | -2.425387 | -0.852373 | 3.220857  |
| 1 | -2.808022 | 0.841778  | 3.430314  |
| 1 | 2.822691  | 6.327751  | -1.314449 |
| 1 | 1.717184  | 5.772657  | -0.042222 |
| 1 | 3.442457  | 5.955322  | 0.297436  |
| 1 | 4.308654  | 4.130026  | -4.022699 |
| 1 | 5.484321  | 6.211960  | -3.694603 |
| 1 | 5.162663  | 6.158305  | -1.872337 |
| 1 | 6.101281  | -1.097987 | -5.591783 |
| 1 | 5.067445  | 0.322760  | -5.754895 |
| 1 | 6.444657  | 0.361624  | -4.652446 |
| 1 | 5.759626  | -3.171899 | -4.915073 |
| 1 | 4.521001  | -5.190022 | -5.249533 |
| 1 | 3.099387  | -4.556204 | -4.255877 |
| 1 | 1.154081  | -6.381912 | 0.087441  |
| 1 | 1.569689  | -5.797104 | -1.529380 |
| 1 | 2.836280  | -6.035908 | -0.325564 |
| 1 | -0.287240 | -5.524998 | 1.650447  |
| 1 | -0.614776 | -4.081292 | 2.585723  |

|   |           |           |           |
|---|-----------|-----------|-----------|
| 1 | 1.684372  | -4.351087 | 3.697651  |
| 1 | 1.891224  | -5.834123 | 2.804369  |
| 1 | -6.690345 | 5.223880  | 6.138867  |
| 1 | -5.310716 | 4.714622  | 7.141919  |
| 1 | -8.382849 | 2.860508  | -0.666063 |
| 1 | -7.376240 | -1.336637 | -5.864391 |

-----  
**Q-10SS<sup>TS</sup>(B-C)<sub>Fe(cys)</sub>**  
 -----

Number of imaginary frequencies: 11    Electronic energy:    HF=-5491.80824563  
 Zero-point correction=                    2.265324 (Hartree/Particle)  
 Thermal correction to Energy=            2.402938  
 Thermal correction to Enthalpy=         2.403882  
 Thermal correction to Gibbs Free Energy= 2.045853  
 Sum of electronic and zero-point Energies= -5489.542921  
 Sum of electronic and thermal Energies= -5489.405307  
 Sum of electronic and thermal Enthalpies= -5489.404363  
 Sum of electronic and thermal Free Energies= -5489.762393

.....  
 Cartesian Coordinates  
 .....

|   |           |           |           |
|---|-----------|-----------|-----------|
| 6 | 2.883618  | 6.174956  | -3.592629 |
| 6 | 2.403954  | 7.134862  | -2.497617 |
| 6 | 3.079378  | 8.521092  | -2.500475 |
| 6 | 2.387667  | 9.459463  | -1.499752 |
| 6 | 4.586052  | 8.440334  | -2.209683 |
| 6 | 5.764044  | -4.589314 | -4.368581 |
| 6 | 6.873251  | -3.679795 | -3.856523 |
| 8 | 8.025243  | -4.063367 | -3.679917 |
| 6 | 5.415026  | -5.770359 | -3.423693 |
| 6 | 6.548913  | -6.801503 | -3.325468 |
| 6 | 4.973086  | -5.280997 | -2.036664 |
| 7 | 6.507981  | -2.381462 | -3.581164 |
| 6 | 7.517451  | -1.388000 | -3.222710 |
| 6 | 8.032636  | -1.527988 | -1.774343 |
| 8 | 9.149622  | -1.126965 | -1.473997 |
| 6 | 6.978236  | 0.029246  | -3.447368 |
| 7 | 7.141393  | -2.052609 | -0.886543 |
| 6 | 7.472619  | -2.309301 | 0.503427  |
| 6 | 6.857883  | -1.300784 | 1.499670  |
| 6 | 7.433496  | 0.096120  | 1.404490  |
| 6 | 6.750751  | 1.115163  | 0.728950  |
| 6 | 8.673587  | 0.396592  | 1.986991  |
| 6 | 7.292512  | 2.399836  | 0.635144  |
| 6 | 9.218896  | 1.676753  | 1.894966  |
| 6 | 8.528536  | 2.685039  | 1.216734  |
| 6 | 0.214582  | -3.280739 | -4.355689 |
| 6 | -0.216304 | -4.443876 | -3.466607 |
| 8 | 0.568734  | -5.190265 | -2.876801 |
| 6 | 1.732079  | -3.158382 | -4.478497 |

|    |            |           |           |
|----|------------|-----------|-----------|
| 7  | -1.572662  | -4.604881 | -3.427191 |
| 6  | -2.208783  | -5.530948 | -2.517361 |
| 6  | -0.120284  | -7.664696 | 1.852803  |
| 6  | -0.030681  | -6.563783 | 0.787316  |
| 8  | 0.237342   | -7.191544 | -0.466225 |
| 6  | 1.038986   | -5.520828 | 1.120474  |
| 6  | 3.438198   | -3.958550 | 6.689452  |
| 6  | 2.594860   | -5.213273 | 6.959039  |
| 6  | 1.568065   | -5.441366 | 5.840073  |
| 6  | 3.487899   | -6.448062 | 7.149701  |
| 6  | 6.962933   | 2.913040  | 6.141160  |
| 6  | 6.173359   | 2.262610  | 5.008260  |
| 8  | 4.926099   | 2.961057  | 4.938409  |
| 6  | 5.956955   | 0.764922  | 5.237585  |
| 6  | -3.125356  | 0.835890  | 6.191515  |
| 6  | -3.922824  | 2.106452  | 5.841073  |
| 6  | -5.339214  | 1.812119  | 5.386336  |
| 6  | -6.382307  | 1.710901  | 6.318232  |
| 6  | -5.633095  | 1.608972  | 4.030124  |
| 6  | -7.683438  | 1.413100  | 5.909000  |
| 6  | -6.933510  | 1.312102  | 3.613894  |
| 6  | -7.961688  | 1.213504  | 4.554614  |
| 6  | -5.949617  | 0.514201  | -1.523539 |
| 6  | -7.151445  | 0.017495  | -0.726787 |
| 8  | -7.908554  | 0.756736  | -0.100868 |
| 6  | -5.237725  | 1.723969  | -0.908054 |
| 16 | -4.074084  | 1.330311  | 0.456172  |
| 7  | -7.384301  | -1.328712 | -0.844621 |
| 6  | -8.580058  | -1.971078 | -0.325253 |
| 6  | -9.712235  | -2.056310 | -1.362401 |
| 6  | -11.027715 | -2.655242 | -0.827623 |
| 6  | -12.154015 | -2.485267 | -1.858739 |
| 6  | -10.884169 | -4.132842 | -0.427773 |
| 26 | -1.941830  | 0.786278  | -0.378414 |
| 6  | -1.314036  | 4.109206  | -0.090594 |
| 6  | -0.974361  | 0.319328  | 2.873129  |
| 6  | -3.218828  | -2.353174 | -0.464321 |
| 6  | -2.759370  | 1.219561  | -3.684822 |
| 7  | -1.217459  | 1.967772  | 1.086991  |
| 6  | -1.060690  | 3.322828  | 1.025581  |
| 6  | -0.563144  | 3.840797  | 2.295423  |
| 6  | -0.406796  | 2.757702  | 3.114654  |
| 6  | -0.852235  | 1.598974  | 2.352066  |
| 6  | 0.138314   | 2.714196  | 4.510195  |
| 6  | -0.270414  | 5.284544  | 2.594506  |
| 6  | 1.108667   | 5.771984  | 2.101637  |
| 6  | 1.370012   | 7.242939  | 2.440479  |
| 7  | -1.977028  | -0.759076 | 0.917689  |
| 6  | -1.542786  | -0.768923 | 2.214516  |
| 6  | -1.841491  | -2.036656 | 2.849244  |

|   |           |           |           |
|---|-----------|-----------|-----------|
| 6 | -2.522983 | -2.784635 | 1.913771  |
| 6 | -2.591953 | -1.962076 | 0.709415  |
| 6 | -1.451144 | -2.428414 | 4.242232  |
| 6 | -3.052874 | -4.137848 | 2.016951  |
| 6 | -3.437425 | -4.784046 | 3.131372  |
| 7 | -2.698740 | -0.393347 | -1.845492 |
| 6 | -3.252181 | -1.635656 | -1.658733 |
| 6 | -3.868479 | -2.100087 | -2.883440 |
| 6 | -3.600999 | -1.142655 | -3.844273 |
| 6 | -2.928070 | -0.057022 | -3.151800 |
| 6 | -4.729656 | -3.320902 | -3.063328 |
| 6 | -3.988389 | -1.220263 | -5.249441 |
| 6 | -3.314415 | -0.726762 | -6.301219 |
| 7 | -1.987524 | 2.347517  | -1.652263 |
| 6 | -2.365486 | 2.340956  | -2.969886 |
| 6 | -2.345454 | 3.689078  | -3.513446 |
| 6 | -1.957174 | 4.512022  | -2.490448 |
| 6 | -1.736479 | 3.651920  | -1.334718 |
| 6 | -2.712309 | 4.051592  | -4.922223 |
| 6 | -1.824005 | 6.008658  | -2.497505 |
| 6 | -3.061196 | 6.745853  | -1.940163 |
| 6 | -2.896290 | 8.268878  | -1.943387 |
| 1 | 8.563455  | -2.289233 | 0.576716  |
| 1 | 7.132052  | -3.319774 | 0.761985  |
| 1 | 6.104456  | -4.992150 | -5.330916 |
| 1 | 4.850792  | -4.012805 | -4.562999 |
| 1 | 4.150260  | -3.772150 | 7.502819  |
| 1 | 4.014427  | -4.067927 | 5.761127  |
| 1 | 2.806787  | -3.068062 | 6.585202  |
| 1 | 7.960150  | 2.466859  | 6.224683  |
| 1 | 7.074377  | 3.986710  | 5.957915  |
| 1 | 6.437872  | 2.781652  | 7.094658  |
| 1 | 2.318422  | 5.236784  | -3.560506 |
| 1 | 2.747961  | 6.613085  | -4.590040 |
| 1 | 3.943886  | 5.921253  | -3.482305 |
| 1 | -0.409444 | -7.237358 | 2.819251  |
| 1 | -0.864865 | -8.414324 | 1.563246  |
| 1 | 0.847039  | -8.169553 | 1.963035  |
| 1 | -2.120021 | 1.087523  | 6.551612  |
| 1 | -3.630810 | 0.258882  | 6.975449  |
| 1 | -3.023286 | 0.192194  | 5.311726  |
| 1 | -3.115163 | -5.946160 | -2.970315 |
| 1 | -1.517664 | -6.346566 | -2.301351 |
| 1 | -2.472500 | -5.052730 | -1.564841 |
| 1 | -0.183071 | -2.350244 | -3.936251 |
| 1 | -0.248460 | -3.412315 | -5.343462 |
| 1 | -6.359356 | 0.807503  | -2.504812 |
| 1 | -5.249334 | -0.297193 | -1.706176 |
| 1 | -8.910999 | -1.377568 | 0.532438  |
| 1 | -8.304239 | -2.966004 | 0.041810  |

|   |           |           |           |
|---|-----------|-----------|-----------|
| 1 | -3.786710 | 8.768079  | -1.543559 |
| 1 | -2.039023 | 8.576881  | -1.330976 |
| 1 | -2.728445 | 8.649243  | -2.959400 |
| 1 | 2.354445  | 7.567195  | 2.081811  |
| 1 | 0.616096  | 7.897142  | 1.983675  |
| 1 | 1.339779  | 7.412951  | 3.524350  |
| 1 | 2.551612  | 6.669031  | -1.511751 |
| 1 | 1.319541  | 7.276455  | -2.604701 |
| 1 | 2.952452  | 8.950234  | -3.507426 |
| 1 | 2.835292  | 10.460937 | -1.514962 |
| 1 | 1.319228  | 9.564830  | -1.724127 |
| 1 | 2.474357  | 9.072372  | -0.475854 |
| 1 | 5.041724  | 9.438214  | -2.215756 |
| 1 | 4.767903  | 7.998505  | -1.220845 |
| 1 | 5.116084  | 7.830658  | -2.949389 |
| 1 | 4.549093  | -6.265507 | -3.884875 |
| 1 | 6.241959  | -7.645624 | -2.695897 |
| 1 | 6.809501  | -7.197010 | -4.315061 |
| 1 | 7.452863  | -6.356095 | -2.900928 |
| 1 | 4.644795  | -6.122693 | -1.416749 |
| 1 | 5.801343  | -4.787464 | -1.510901 |
| 1 | 4.131551  | -4.581606 | -2.106134 |
| 1 | 5.589762  | -2.060700 | -3.858210 |
| 1 | 8.402947  | -1.554068 | -3.843598 |
| 1 | 7.739790  | 0.757282  | -3.156032 |
| 1 | 6.726142  | 0.188070  | -4.502124 |
| 1 | 6.083693  | 0.215126  | -2.841071 |
| 1 | 6.279249  | -2.424900 | -1.260626 |
| 1 | 7.024426  | -1.701112 | 2.509509  |
| 1 | 5.771362  | -1.267393 | 1.349148  |
| 1 | 5.778208  | 0.910309  | 0.290863  |
| 1 | 9.218433  | -0.382829 | 2.516390  |
| 1 | 6.739924  | 3.176751  | 0.113070  |
| 1 | 10.182128 | 1.888149  | 2.352869  |
| 1 | 8.950042  | 3.684584  | 1.146361  |
| 1 | 1.989031  | -2.313185 | -5.126682 |
| 1 | 2.173070  | -2.982066 | -3.492789 |
| 1 | 2.177466  | -4.070607 | -4.891401 |
| 1 | -2.115500 | -3.799617 | -3.714546 |
| 1 | -1.006938 | -6.051237 | 0.747509  |
| 1 | 0.386701  | -6.497502 | -1.139582 |
| 1 | 1.056757  | -4.731582 | 0.359641  |
| 1 | 0.838593  | -5.050649 | 2.091515  |
| 1 | 2.028735  | -5.993174 | 1.156224  |
| 1 | 2.041063  | -5.050854 | 7.896353  |
| 1 | 0.941892  | -6.318153 | 6.044952  |
| 1 | 0.904888  | -4.575839 | 5.723516  |
| 1 | 2.067783  | -5.608932 | 4.876940  |
| 1 | 2.892053  | -7.340645 | 7.376247  |
| 1 | 4.064728  | -6.656564 | 6.238902  |

|   |            |           |           |
|---|------------|-----------|-----------|
| 1 | 4.201955   | -6.302763 | 7.969830  |
| 1 | 6.729365   | 2.397392  | 4.067015  |
| 1 | 4.388795   | 2.551895  | 4.241673  |
| 1 | 5.384121   | 0.322801  | 4.412395  |
| 1 | 6.913309   | 0.231603  | 5.295494  |
| 1 | 5.403001   | 0.597240  | 6.168817  |
| 1 | -3.390930  | 2.652131  | 5.052107  |
| 1 | -3.949291  | 2.765936  | 6.719372  |
| 1 | -6.172454  | 1.873037  | 7.374749  |
| 1 | -4.847189  | 1.685952  | 3.281944  |
| 1 | -8.479951  | 1.343720  | 6.647137  |
| 1 | -7.138866  | 1.165859  | 2.556081  |
| 1 | -8.975401  | 0.987561  | 4.232173  |
| 1 | -5.993445  | 2.397951  | -0.490440 |
| 1 | -4.699087  | 2.266100  | -1.689086 |
| 1 | -6.693604  | -1.890445 | -1.320134 |
| 1 | -9.371869  | -2.641004 | -2.231148 |
| 1 | -9.901661  | -1.037920 | -1.724820 |
| 1 | -11.309077 | -2.087047 | 0.072437  |
| 1 | -11.837245 | -4.534769 | -0.062408 |
| 1 | -10.576386 | -4.741231 | -1.289137 |
| 1 | -10.141809 | -4.277060 | 0.364624  |
| 1 | -1.152097  | 5.176399  | 0.013029  |
| 1 | -0.669515  | 0.174427  | 3.903359  |
| 1 | -3.717129  | -3.315190 | -0.454753 |
| 1 | -3.052360  | 1.364529  | -4.717220 |
| 1 | -0.511779  | 2.150434  | 5.189791  |
| 1 | 1.126912   | 2.235519  | 4.536270  |
| 1 | 0.254843   | 3.720565  | 4.924818  |
| 1 | -0.331289  | 5.450422  | 3.678502  |
| 1 | -1.050251  | 5.921506  | 2.153540  |
| 1 | 1.177233   | 5.619792  | 1.017066  |
| 1 | 1.888677   | 5.139715  | 2.543124  |
| 1 | -1.263772  | -3.506967 | 4.301342  |
| 1 | -0.542919  | -1.910479 | 4.569103  |
| 1 | -2.235584  | -2.197686 | 4.976692  |
| 1 | -3.142697  | -4.679233 | 1.075480  |
| 1 | -3.800047  | -5.807031 | 3.081237  |
| 1 | -3.431837  | -4.318595 | 4.111516  |
| 1 | -4.451792  | -3.905603 | -3.948774 |
| 1 | -4.686008  | -3.992780 | -2.202799 |
| 1 | -5.784897  | -3.040615 | -3.203749 |
| 1 | -4.904983  | -1.777827 | -5.451389 |
| 1 | -3.690684  | -0.847928 | -7.313488 |
| 1 | -2.363779  | -0.214530 | -6.186869 |
| 1 | -2.521183  | 5.110548  | -5.124132 |
| 1 | -2.140531  | 3.467238  | -5.654816 |
| 1 | -3.775238  | 3.866282  | -5.127703 |
| 1 | -1.639641  | 6.358324  | -3.522529 |
| 1 | -0.941298  | 6.310532  | -1.916224 |

|   |            |           |           |
|---|------------|-----------|-----------|
| 1 | -3.259839  | 6.392640  | -0.920653 |
| 1 | -3.939635  | 6.463552  | -2.535086 |
| 1 | -11.922133 | -3.027956 | -2.785061 |
| 1 | -13.106349 | -2.873533 | -1.476577 |
| 1 | -12.299773 | -1.430197 | -2.118948 |
| 6 | 0.345353   | 0.347984  | -1.041137 |
| 6 | 1.390656   | 0.951305  | -0.151295 |
| 6 | 1.871025   | 2.264377  | -0.339559 |
| 6 | 1.942942   | 0.265403  | 0.975523  |
| 6 | 2.857990   | 2.846243  | 0.457564  |
| 1 | 1.451291   | 2.850107  | -1.141368 |
| 6 | 2.949469   | 0.838970  | 1.763455  |
| 6 | 3.417860   | 2.129961  | 1.508311  |
| 1 | 3.183484   | 3.861508  | 0.245104  |
| 1 | 3.362746   | 0.277995  | 2.594348  |
| 1 | 4.209788   | 2.559038  | 2.118098  |
| 6 | 0.423743   | 0.606853  | -2.501916 |
| 8 | 0.190212   | -0.214220 | -3.381046 |
| 8 | 0.768869   | 1.888817  | -2.851071 |
| 6 | 0.878726   | 2.164201  | -4.256083 |
| 1 | 0.083894   | 1.638150  | -4.789177 |
| 1 | 0.712985   | 3.242524  | -4.336836 |
| 6 | 2.248829   | 1.773261  | -4.798209 |
| 1 | 3.046320   | 2.270978  | -4.235406 |
| 1 | 2.387329   | 0.690951  | -4.723898 |
| 1 | 2.337111   | 2.063626  | -5.852870 |
| 8 | 1.441435   | -0.970709 | 1.265771  |
| 6 | 2.008649   | -1.728946 | 2.308646  |
| 1 | 3.077336   | -1.925684 | 2.136498  |
| 1 | 1.891602   | -1.237470 | 3.285228  |
| 1 | 1.465310   | -2.675150 | 2.315322  |
| 7 | 0.673431   | -1.359872 | -1.073445 |
| 7 | -0.085208  | -2.217015 | -1.166670 |

---

**W-1C<sup>SSS</sup>TS(C-D)<sub>Fe(his)</sub>**

---

Number of imaginary frequencies: 1    Electronic energy:    HF=-2835.7237206  
Zero-point correction=                    0.893707 (Hartree/Particle)  
Thermal correction to Energy=            0.950916  
Thermal correction to Enthalpy=         0.951861  
Thermal correction to Gibbs Free Energy= 0.801880  
Sum of electronic and zero-point Energies= -2834.815587  
Sum of electronic and thermal Energies= -2834.758378  
Sum of electronic and thermal Enthalpies= -2834.757433  
Sum of electronic and thermal Free Energies= -2834.907414

.....  
Cartesian Coordinates  
.....

|   |           |           |           |
|---|-----------|-----------|-----------|
| 6 | 3.555716  | -3.237684 | -0.959380 |
| 6 | 2.257595  | -2.703115 | -0.598801 |
| 7 | 2.255939  | -1.339812 | -0.672671 |
| 6 | 3.500641  | -0.983396 | -1.094508 |
| 6 | 4.336310  | -2.161418 | -1.280416 |
| 6 | 1.167638  | -3.484589 | -0.252024 |
| 6 | -0.097010 | -3.021763 | 0.086882  |
| 7 | -0.468589 | -1.715271 | 0.145888  |
| 6 | -1.781811 | -1.708482 | 0.510108  |
| 6 | -2.261099 | -3.065111 | 0.704714  |
| 6 | -1.206622 | -3.886008 | 0.434867  |
| 6 | -2.567973 | -0.569334 | 0.610936  |
| 6 | -2.168120 | 0.725533  | 0.304754  |
| 7 | -0.905108 | 1.087097  | -0.051298 |
| 6 | -0.940509 | 2.425726  | -0.281457 |
| 6 | -2.275881 | 2.945147  | -0.075857 |
| 6 | -3.046101 | 1.881907  | 0.288098  |
| 6 | 0.148786  | 3.218047  | -0.619440 |
| 6 | 1.445967  | 2.777553  | -0.812516 |
| 7 | 1.829201  | 1.470940  | -0.811962 |
| 6 | 3.143288  | 1.461162  | -1.164775 |
| 6 | 3.632999  | 2.808511  | -1.369968 |
| 6 | 2.579695  | 3.640175  | -1.124306 |
| 6 | 3.923065  | 0.320529  | -1.315694 |
| 1 | -0.031137 | 4.280296  | -0.739534 |
| 1 | 4.945919  | 0.465305  | -1.647933 |
| 1 | 1.309636  | -4.560981 | -0.257157 |
| 1 | -3.598563 | -0.707232 | 0.919957  |
| 6 | -4.534729 | 1.862134  | 0.449418  |
| 1 | -4.857515 | 1.032757  | 1.087196  |
| 1 | -4.876973 | 2.782508  | 0.936859  |
| 6 | -5.204731 | 1.743247  | -0.940820 |
| 1 | -4.916826 | 0.788664  | -1.397931 |
| 1 | -4.866169 | 2.558153  | -1.583639 |
| 6 | -6.702162 | 1.819978  | -0.864554 |
| 8 | -7.412471 | 2.716758  | -1.237888 |
| 8 | -7.229926 | 0.710176  | -0.267974 |
| 1 | -8.193186 | 0.827699  | -0.240545 |
| 6 | -3.662074 | -3.475748 | 1.040855  |
| 1 | -4.111951 | -2.799085 | 1.775007  |
| 1 | -3.642276 | -4.463593 | 1.512165  |
| 6 | -4.581692 | -3.565401 | -0.202830 |
| 1 | -4.045525 | -4.021452 | -1.037542 |
| 1 | -5.453201 | -4.182957 | 0.040895  |
| 6 | -5.097794 | -2.217370 | -0.643042 |
| 8 | -4.805122 | -1.641455 | -1.670189 |
| 8 | -5.941113 | -1.712864 | 0.267362  |
| 1 | -6.294320 | -0.855119 | -0.046132 |
| 6 | -1.143894 | -5.381292 | 0.462302  |
| 1 | -2.091939 | -5.819866 | 0.786985  |



|   |           |           |           |
|---|-----------|-----------|-----------|
| 1 | -0.913939 | -5.790938 | -0.528626 |
| 1 | -0.364247 | -5.736176 | 1.147702  |
| 6 | -2.677980 | 4.374575  | -0.259860 |
| 1 | -2.533373 | 4.702755  | -1.296041 |
| 1 | -3.730735 | 4.532166  | -0.006298 |
| 1 | -2.079500 | 5.038095  | 0.376076  |
| 6 | 3.931846  | -4.684845 | -0.928852 |
| 1 | 3.453810  | -5.203312 | -0.090866 |
| 1 | 3.633188  | -5.203689 | -1.848600 |
| 1 | 5.015274  | -4.798842 | -0.823764 |
| 6 | 5.044633  | 3.164411  | -1.712639 |
| 1 | 5.733801  | 2.848305  | -0.920147 |
| 1 | 5.368448  | 2.678500  | -2.640917 |
| 1 | 5.163623  | 4.243934  | -1.839678 |
| 6 | 5.736692  | -2.128800 | -1.698256 |
| 6 | 6.349151  | -3.044694 | -2.455016 |
| 1 | 6.320878  | -1.274652 | -1.355699 |
| 1 | 7.402460  | -2.953510 | -2.702576 |
| 1 | 5.818859  | -3.897338 | -2.869179 |
| 6 | 2.595591  | 5.104158  | -1.141314 |
| 6 | 1.971293  | 5.898728  | -0.266680 |
| 1 | 3.198591  | 5.566641  | -1.922829 |
| 1 | 2.040023  | 6.979807  | -0.346056 |
| 1 | 1.398745  | 5.494837  | 0.563862  |
| 6 | 1.194394  | 0.164832  | 1.668847  |
| 6 | 1.230559  | 1.533839  | 2.237979  |
| 6 | 0.719001  | -0.905745 | 2.581948  |
| 6 | 0.087049  | 2.228713  | 2.628164  |
| 6 | 2.459792  | 2.192893  | 2.327922  |
| 8 | -0.330409 | -0.815290 | 3.179911  |
| 8 | 1.521790  | -1.979586 | 2.606210  |
| 6 | 0.184555  | 3.549722  | 3.060362  |
| 1 | -0.873826 | 1.731054  | 2.578193  |
| 6 | 2.575604  | 3.507692  | 2.738296  |
| 8 | 3.581125  | 1.487456  | 1.943195  |
| 6 | 1.417731  | 4.192919  | 3.102231  |
| 1 | -0.715843 | 4.076268  | 3.361197  |
| 1 | 3.553782  | 3.974237  | 2.771468  |
| 6 | 3.384857  | 0.139612  | 2.034859  |
| 1 | 1.488060  | 5.225245  | 3.431282  |
| 1 | 3.271529  | -0.247739 | 3.048879  |
| 1 | 4.114283  | -0.402526 | 1.432245  |
| 1 | 2.402922  | -0.166278 | 1.325216  |
| 7 | 0.097282  | -0.339323 | -2.252220 |
| 6 | -1.110487 | -0.667231 | -2.658792 |
| 6 | 0.860212  | -0.169955 | -3.381893 |
| 7 | -1.156834 | -0.715346 | -4.009105 |
| 1 | -1.961238 | -0.875124 | -2.026555 |
| 6 | 0.095687  | -0.400389 | -4.488670 |
| 1 | 1.901553  | 0.104518  | -3.312117 |

|    |           |           |           |
|----|-----------|-----------|-----------|
| 1  | -1.972243 | -0.943377 | -4.554066 |
| 1  | 0.320024  | -0.370303 | -5.542719 |
| 6  | 0.999195  | -3.150391 | 3.251894  |
| 1  | -0.069551 | -3.219746 | 3.033696  |
| 1  | 1.516837  | -3.977789 | 2.761518  |
| 6  | 1.264843  | -3.122414 | 4.745641  |
| 1  | 0.726699  | -2.293081 | 5.211650  |
| 1  | 0.923628  | -4.057376 | 5.202615  |
| 1  | 2.335228  | -3.011905 | 4.947235  |
| 26 | 0.684607  | -0.116797 | -0.298173 |

\*w-TS(C-D)<sub>Fe</sub> for wB97XD

---

**W-<sup>10SS</sup>TS(C-D)<sub>Fe(his)</sub>**

---

Number of imaginary frequencies: 1    Electronic energy:    HF=-2835.7000511  
Zero-point correction=                    0.890104 (Hartree/Particle)  
Thermal correction to Energy=            0.947841  
Thermal correction to Enthalpy=         0.948785  
Thermal correction to Gibbs Free Energy= 0.797305  
Sum of electronic and zero-point Energies= -2834.809947  
Sum of electronic and thermal Energies= -2834.752210  
Sum of electronic and thermal Enthalpies= -2834.751266  
Sum of electronic and thermal Free Energies= -2834.902746

.....  
Cartesian Coordinates

.....  

|   |           |           |           |
|---|-----------|-----------|-----------|
| 6 | 3.541019  | -3.271398 | -0.891451 |
| 6 | 2.234481  | -2.736966 | -0.577602 |
| 7 | 2.235690  | -1.370852 | -0.657866 |
| 6 | 3.497210  | -1.018745 | -1.031391 |
| 6 | 4.333225  | -2.196680 | -1.184611 |
| 6 | 1.141480  | -3.519894 | -0.265974 |
| 6 | -0.119871 | -3.045466 | 0.059221  |
| 7 | -0.471159 | -1.734117 | 0.131567  |
| 6 | -1.785719 | -1.715858 | 0.495016  |
| 6 | -2.282722 | -3.064480 | 0.670898  |
| 6 | -1.238927 | -3.896474 | 0.390618  |
| 6 | -2.556330 | -0.570960 | 0.604917  |
| 6 | -2.137177 | 0.713775  | 0.298276  |
| 7 | -0.871651 | 1.064750  | -0.074348 |
| 6 | -0.899445 | 2.406640  | -0.298664 |
| 6 | -2.223307 | 2.932993  | -0.079949 |
| 6 | -2.999483 | 1.874860  | 0.290137  |
| 6 | 0.185188  | 3.198880  | -0.645301 |
| 6 | 1.474772  | 2.748051  | -0.825660 |
| 7 | 1.847370  | 1.436707  | -0.802732 |
| 6 | 3.166392  | 1.415980  | -1.131272 |
| 6 | 3.667312  | 2.756453  | -1.346375 |
| 6 | 2.616369  | 3.597539  | -1.132223 |

|   |           |           |           |
|---|-----------|-----------|-----------|
| 6 | 3.939641  | 0.273604  | -1.258653 |
| 1 | 0.008579  | 4.260850  | -0.766115 |
| 1 | 4.971998  | 0.404692  | -1.563728 |
| 1 | 1.280040  | -4.595989 | -0.271525 |
| 1 | -3.586407 | -0.694357 | 0.919338  |
| 6 | -4.485993 | 1.874444  | 0.470273  |
| 1 | -4.815191 | 1.037418  | 1.094125  |
| 1 | -4.805728 | 2.789500  | 0.981887  |
| 6 | -5.172970 | 1.797330  | -0.914733 |
| 1 | -4.906591 | 0.848419  | -1.395706 |
| 1 | -4.827762 | 2.620857  | -1.542926 |
| 6 | -6.667673 | 1.901457  | -0.814509 |
| 8 | -7.360914 | 2.834446  | -1.125085 |
| 8 | -7.211333 | 0.771108  | -0.274713 |
| 1 | -8.170946 | 0.907773  | -0.219776 |
| 6 | -3.688215 | -3.460517 | 1.004558  |
| 1 | -4.130496 | -2.782475 | 1.741891  |
| 1 | -3.678755 | -4.450125 | 1.472002  |
| 6 | -4.606695 | -3.534651 | -0.240904 |
| 1 | -4.075561 | -3.997501 | -1.075172 |
| 1 | -5.488100 | -4.138564 | 0.000196  |
| 6 | -5.097023 | -2.175809 | -0.676907 |
| 8 | -4.772133 | -1.590513 | -1.689365 |
| 8 | -5.951868 | -1.671813 | 0.221838  |
| 1 | -6.289872 | -0.805679 | -0.085208 |
| 6 | -1.194399 | -5.392373 | 0.404924  |
| 1 | -2.158259 | -5.821777 | 0.692536  |
| 1 | -0.935609 | -5.795517 | -0.581319 |
| 1 | -0.443740 | -5.761292 | 1.114490  |
| 6 | -2.611282 | 4.368599  | -0.242919 |
| 1 | -2.451199 | 4.715807  | -1.270373 |
| 1 | -3.665570 | 4.529603  | 0.000905  |
| 1 | -2.015096 | 5.011662  | 0.415512  |
| 6 | 3.914289  | -4.718576 | -0.842161 |
| 1 | 3.428905  | -5.226099 | -0.002051 |
| 1 | 3.623041  | -5.246075 | -1.759217 |
| 1 | 4.996311  | -4.831447 | -0.725833 |
| 6 | 5.089360  | 3.098274  | -1.654967 |
| 1 | 5.746366  | 2.806441  | -0.826993 |
| 1 | 5.443557  | 2.582661  | -2.555473 |
| 1 | 5.214258  | 4.173144  | -1.811162 |
| 6 | 5.750085  | -2.167450 | -1.545938 |
| 6 | 6.376959  | -3.070610 | -2.305321 |
| 1 | 6.330612  | -1.332936 | -1.153270 |
| 1 | 7.440223  | -2.990051 | -2.510009 |
| 1 | 5.849479  | -3.902927 | -2.762519 |
| 6 | 2.636589  | 5.061612  | -1.175372 |
| 6 | 2.017753  | 5.870234  | -0.310448 |
| 1 | 3.237453  | 5.507730  | -1.967761 |
| 1 | 2.089622  | 6.949678  | -0.406918 |

|    |           |           |           |
|----|-----------|-----------|-----------|
| 1  | 1.452016  | 5.480083  | 0.531336  |
| 6  | 1.190314  | 0.125182  | 1.616537  |
| 6  | 1.219879  | 1.511111  | 2.171819  |
| 6  | 0.601034  | -0.887526 | 2.533685  |
| 6  | 0.075449  | 2.189098  | 2.604430  |
| 6  | 2.440310  | 2.205843  | 2.240821  |
| 8  | -0.409806 | -0.752854 | 3.193178  |
| 8  | 1.339345  | -2.018738 | 2.552773  |
| 6  | 0.131384  | 3.513227  | 3.026013  |
| 1  | -0.869157 | 1.657984  | 2.593845  |
| 6  | 2.508020  | 3.534505  | 2.642385  |
| 8  | 3.622686  | 1.609080  | 1.869949  |
| 6  | 1.346476  | 4.194227  | 3.027982  |
| 1  | -0.777726 | 4.012039  | 3.349100  |
| 1  | 3.474017  | 4.028447  | 2.650652  |
| 6  | 3.679542  | 0.250122  | 2.081605  |
| 1  | 1.397672  | 5.231489  | 3.347319  |
| 1  | 3.621559  | -0.053413 | 3.131026  |
| 1  | 4.466155  | -0.206695 | 1.488206  |
| 1  | 2.407969  | -0.162141 | 1.566502  |
| 7  | 0.091152  | -0.359221 | -2.297663 |
| 6  | -1.103365 | -0.727466 | -2.708175 |
| 6  | 0.840815  | -0.121878 | -3.423260 |
| 7  | -1.154096 | -0.735872 | -4.058517 |
| 1  | -1.943867 | -0.984898 | -2.079744 |
| 6  | 0.081245  | -0.352452 | -4.533419 |
| 1  | 1.869944  | 0.194886  | -3.348000 |
| 1  | -1.962905 | -0.977680 | -4.607993 |
| 1  | 0.298276  | -0.282169 | -5.587105 |
| 6  | 0.791481  | -3.124448 | 3.272088  |
| 1  | -0.291284 | -3.147176 | 3.120144  |
| 1  | 1.235779  | -4.004398 | 2.798580  |
| 6  | 1.137286  | -3.053830 | 4.749312  |
| 1  | 0.669325  | -2.176718 | 5.203036  |
| 1  | 0.774131  | -3.949442 | 5.265333  |
| 1  | 2.221378  | -2.990560 | 4.888083  |
| 26 | 0.708602  | -0.135990 | -0.259461 |

---

**W-<sup>3</sup>TS(C-D)<sub>Fe(his)</sub>**

---

Number of imaginary frequencies: 1    Electronic energy:    HF=-2835.6866358  
Zero-point correction=                    0.890068 (Hartree/Particle)  
Thermal correction to Energy=            0.947954  
Thermal correction to Enthalpy=         0.948898  
Thermal correction to Gibbs Free Energy= 0.795684  
Sum of electronic and zero-point Energies= -2834.801235  
Sum of electronic and thermal Energies= -2834.743349  
Sum of electronic and thermal Enthalpies= -2834.742405  
Sum of electronic and thermal Free Energies= -2834.895619

.....  
 Cartesian Coordinates  
 .....

|   |           |           |           |
|---|-----------|-----------|-----------|
| 6 | 3.650053  | -3.178894 | -0.830303 |
| 6 | 2.327836  | -2.665568 | -0.541958 |
| 7 | 2.306698  | -1.303411 | -0.621261 |
| 6 | 3.564988  | -0.930492 | -0.976134 |
| 6 | 4.427948  | -2.090431 | -1.110057 |
| 6 | 1.240341  | -3.466843 | -0.252903 |
| 6 | -0.035154 | -3.022027 | 0.054084  |
| 7 | -0.434206 | -1.719881 | 0.113555  |
| 6 | -1.750092 | -1.743968 | 0.476341  |
| 6 | -2.199889 | -3.104319 | 0.659962  |
| 6 | -1.127969 | -3.903686 | 0.386437  |
| 6 | -2.560394 | -0.626189 | 0.581048  |
| 6 | -2.171768 | 0.664655  | 0.269707  |
| 7 | -0.911067 | 1.033666  | -0.098854 |
| 6 | -0.959786 | 2.374440  | -0.322628 |
| 6 | -2.294667 | 2.880164  | -0.107061 |
| 6 | -3.054282 | 1.810840  | 0.260742  |
| 6 | 0.109968  | 3.183503  | -0.668082 |
| 6 | 1.412580  | 2.761483  | -0.841311 |
| 7 | 1.826889  | 1.463468  | -0.809849 |
| 6 | 3.155289  | 1.484149  | -1.117580 |
| 6 | 3.610794  | 2.836190  | -1.337363 |
| 6 | 2.528589  | 3.643251  | -1.142653 |
| 6 | 3.971306  | 0.371185  | -1.216863 |
| 1 | -0.086389 | 4.241080  | -0.794501 |
| 1 | 5.003752  | 0.534126  | -1.505910 |
| 1 | 1.399427  | -4.540038 | -0.253252 |
| 1 | -3.586050 | -0.779691 | 0.895609  |
| 6 | -4.539788 | 1.781307  | 0.445366  |
| 1 | -4.847886 | 0.945593  | 1.081833  |
| 1 | -4.877313 | 2.695825  | 0.946182  |
| 6 | -5.230867 | 1.670488  | -0.935128 |
| 1 | -4.940091 | 0.724933  | -1.408540 |
| 1 | -4.912909 | 2.497655  | -1.572918 |
| 6 | -6.727552 | 1.731424  | -0.827451 |
| 8 | -7.449377 | 2.641660  | -1.140144 |
| 8 | -7.234641 | 0.588994  | -0.277551 |
| 1 | -8.197510 | 0.698013  | -0.217567 |
| 6 | -3.592406 | -3.542597 | 0.996181  |
| 1 | -4.052740 | -2.877654 | 1.734287  |
| 1 | -3.552155 | -4.530708 | 1.464844  |
| 6 | -4.511260 | -3.645200 | -0.247010 |
| 1 | -3.969123 | -4.092964 | -1.082446 |
| 1 | -5.373249 | -4.275285 | -0.002684 |
| 6 | -5.044458 | -2.302585 | -0.684097 |
| 8 | -4.743578 | -1.711497 | -1.700458 |
| 8 | -5.907993 | -1.820823 | 0.218701  |

|   |           |           |           |
|---|-----------|-----------|-----------|
| 1 | -6.272226 | -0.965443 | -0.088674 |
| 6 | -1.035677 | -5.397111 | 0.416329  |
| 1 | -1.990521 | -5.854416 | 0.690152  |
| 1 | -0.745400 | -5.800665 | -0.560793 |
| 1 | -0.287200 | -5.733724 | 1.143912  |
| 6 | -2.700153 | 4.311382  | -0.259923 |
| 1 | -2.527169 | 4.673606  | -1.279969 |
| 1 | -3.760318 | 4.455227  | -0.031653 |
| 1 | -2.122110 | 4.951373  | 0.417480  |
| 6 | 4.048098  | -4.618845 | -0.769360 |
| 1 | 3.556946  | -5.132223 | 0.063873  |
| 1 | 3.783271  | -5.154780 | -1.689565 |
| 1 | 5.129669  | -4.711537 | -0.632830 |
| 6 | 5.024557  | 3.226247  | -1.626637 |
| 1 | 5.673996  | 2.983178  | -0.777341 |
| 1 | 5.418124  | 2.703085  | -2.506027 |
| 1 | 5.109880  | 4.300953  | -1.808145 |
| 6 | 5.850133  | -2.032155 | -1.445433 |
| 6 | 6.509957  | -2.924335 | -2.189705 |
| 1 | 6.405008  | -1.184375 | -1.044136 |
| 1 | 7.575010  | -2.822435 | -2.374498 |
| 1 | 6.008727  | -3.769464 | -2.652965 |
| 6 | 2.504406  | 5.107072  | -1.200251 |
| 6 | 1.860696  | 5.906992  | -0.345565 |
| 1 | 3.094348  | 5.561664  | -1.996015 |
| 1 | 1.903085  | 6.986827  | -0.454187 |
| 1 | 1.304728  | 5.510855  | 0.499943  |
| 6 | 1.216707  | 0.158984  | 1.663908  |
| 6 | 1.071325  | 1.540482  | 2.201500  |
| 6 | 0.684889  | -0.913565 | 2.538858  |
| 6 | -0.143647 | 2.083681  | 2.636592  |
| 6 | 2.203572  | 2.378113  | 2.248366  |
| 8 | -0.332910 | -0.872957 | 3.203175  |
| 8 | 1.493316  | -1.998121 | 2.522022  |
| 6 | -0.249843 | 3.412231  | 3.031497  |
| 1 | -1.015814 | 1.440668  | 2.642594  |
| 6 | 2.105123  | 3.712667  | 2.631577  |
| 8 | 3.449297  | 1.936724  | 1.888820  |
| 6 | 0.874156  | 4.235390  | 3.010423  |
| 1 | -1.212055 | 3.803013  | 3.349771  |
| 1 | 3.004740  | 4.319645  | 2.627132  |
| 6 | 3.684993  | 0.580125  | 2.105995  |
| 1 | 0.801270  | 5.277263  | 3.310962  |
| 1 | 3.769050  | 0.322319  | 3.167956  |
| 1 | 4.517745  | 0.246019  | 1.491472  |
| 1 | 2.531142  | 0.025322  | 1.692219  |
| 7 | 0.167239  | -0.386963 | -2.322646 |
| 6 | -1.031054 | -0.720112 | -2.753323 |
| 6 | 0.964883  | -0.248586 | -3.431724 |
| 7 | -1.037527 | -0.801345 | -4.100932 |

|    |           |           |           |
|----|-----------|-----------|-----------|
| 1  | -1.899287 | -0.910637 | -2.138658 |
| 6  | 0.230504  | -0.503040 | -4.552877 |
| 1  | 2.005220  | 0.023110  | -3.336343 |
| 1  | -1.837095 | -1.040207 | -4.665301 |
| 1  | 0.483092  | -0.499720 | -5.600928 |
| 6  | 1.024998  | -3.151252 | 3.220227  |
| 1  | -0.055617 | -3.242439 | 3.076522  |
| 1  | 1.522451  | -3.990668 | 2.725653  |
| 6  | 1.377245  | -3.090578 | 4.696577  |
| 1  | 0.855743  | -2.256530 | 5.172544  |
| 1  | 1.078700  | -4.019479 | 5.195053  |
| 1  | 2.455692  | -2.957494 | 4.828951  |
| 26 | 0.709960  | -0.116683 | -0.283452 |

---

**W-1CSSS<sup>TS</sup>(C-D)<sub>Fe(his)</sub>**

---

Number of imaginary frequencies: 1    Electronic energy:    HF=-3047.6562772  
Zero-point correction=                    0.856948 (Hartree/Particle)  
Thermal correction to Energy=            0.913370  
Thermal correction to Enthalpy=         0.914315  
Thermal correction to Gibbs Free Energy= 0.767098  
Sum of electronic and zero-point Energies= -3046.799329  
Sum of electronic and thermal Energies= -3046.742907  
Sum of electronic and thermal Enthalpies= -3046.741963  
Sum of electronic and thermal Free Energies= -3046.889180

.....  
Cartesian Coordinates

.....  

|    |           |           |           |
|----|-----------|-----------|-----------|
| 6  | 2.837535  | 1.314420  | 3.375408  |
| 6  | 1.969579  | 2.289501  | 2.893990  |
| 6  | 0.747406  | 1.938185  | 2.325318  |
| 6  | 0.366979  | 0.599768  | 2.257100  |
| 6  | 1.224753  | -0.353266 | 2.812473  |
| 6  | 2.456523  | -0.025711 | 3.348918  |
| 6  | -0.858063 | 0.139609  | 1.565961  |
| 8  | 0.818289  | -1.669850 | 2.769724  |
| 6  | -0.538814 | -1.778765 | 2.611480  |
| 26 | -0.836760 | -0.083056 | -0.521854 |
| 7  | -2.464796 | 1.092183  | -0.679055 |
| 6  | -2.480103 | 2.442317  | -0.768722 |
| 6  | -3.848639 | 2.936516  | -0.826463 |
| 6  | -4.655071 | 1.832151  | -0.773038 |
| 6  | -3.765335 | 0.691131  | -0.695083 |
| 6  | -1.350731 | 3.251736  | -0.831579 |
| 6  | -0.036266 | 2.819958  | -0.806925 |
| 7  | 0.364255  | 1.530043  | -0.660557 |
| 6  | 1.718766  | 1.551843  | -0.659003 |
| 6  | 2.217461  | 2.910833  | -0.827079 |

|    |           |           |           |
|----|-----------|-----------|-----------|
| 6  | 1.116213  | 3.705128  | -0.907964 |
| 6  | -4.195499 | -0.628326 | -0.656235 |
| 6  | -3.385290 | -1.751334 | -0.584128 |
| 7  | -2.032190 | -1.724106 | -0.454409 |
| 6  | -1.626879 | -3.021368 | -0.391644 |
| 6  | -2.760582 | -3.916641 | -0.442668 |
| 6  | -3.867849 | -3.127222 | -0.586858 |
| 6  | 2.525278  | 0.439235  | -0.475542 |
| 6  | 2.083843  | -0.865123 | -0.319221 |
| 7  | 0.789076  | -1.268661 | -0.361709 |
| 6  | 0.811548  | -2.626928 | -0.264313 |
| 6  | 2.174897  | -3.107566 | -0.115296 |
| 6  | 2.967829  | -2.003001 | -0.135013 |
| 6  | -0.304915 | -3.447287 | -0.286496 |
| 6  | -2.137398 | 0.602623  | 2.150629  |
| 8  | -3.031882 | -0.382502 | 2.342864  |
| 8  | -2.364310 | 1.771159  | 2.381860  |
| 1  | -0.134306 | -4.518717 | -0.223982 |
| 1  | -5.265836 | -0.798272 | -0.686768 |
| 1  | -1.513769 | 4.319679  | -0.941197 |
| 1  | 3.595742  | 0.597096  | -0.480679 |
| 1  | 0.089320  | 2.690997  | 1.908739  |
| 1  | 2.248549  | 3.338524  | 2.938839  |
| 1  | 3.099465  | -0.811401 | 3.730808  |
| 1  | 3.814770  | 1.587016  | 3.759076  |
| 1  | -1.130477 | -1.490911 | 3.482344  |
| 1  | -0.874719 | -1.145360 | 1.574522  |
| 1  | -0.803570 | -2.752458 | 2.197405  |
| 6  | 0.848436  | -0.506862 | -3.436203 |
| 1  | 1.272057  | -1.427912 | -3.016558 |
| 1  | 0.877570  | -0.587364 | -4.529788 |
| 1  | 1.496432  | 0.327093  | -3.140705 |
| 16 | -0.874765 | -0.243667 | -2.900632 |
| 6  | 1.025184  | 5.188792  | -1.083123 |
| 1  | 2.015010  | 5.654833  | -1.114688 |
| 1  | 0.504030  | 5.448905  | -2.012524 |
| 1  | 0.468558  | 5.652880  | -0.259199 |
| 6  | 2.562812  | -4.544050 | 0.041017  |
| 1  | 2.253410  | -5.137268 | -0.828420 |
| 1  | 3.646284  | -4.658921 | 0.149485  |
| 1  | 2.090253  | -4.992004 | 0.924108  |
| 6  | -2.678739 | -5.410903 | -0.414213 |
| 1  | -2.123019 | -5.768375 | 0.461945  |
| 1  | -3.673545 | -5.866444 | -0.389341 |
| 1  | -2.164027 | -5.796392 | -1.303152 |
| 6  | -6.149454 | 1.766618  | -0.746487 |
| 1  | -6.571320 | 1.607711  | -1.747771 |
| 1  | -6.502590 | 0.945366  | -0.112191 |
| 1  | -6.569027 | 2.700607  | -0.357240 |
| 6  | -4.222791 | 4.345636  | -0.878162 |



|   |           |           |           |
|---|-----------|-----------|-----------|
| 6 | -5.300472 | 4.860047  | -1.481974 |
| 1 | -3.550322 | 5.033418  | -0.364903 |
| 1 | -5.508931 | 5.925775  | -1.443655 |
| 1 | -5.989146 | 4.244492  | -2.053482 |
| 6 | -5.248002 | -3.594221 | -0.719225 |
| 6 | -6.197278 | -3.080514 | -1.509238 |
| 1 | -5.506461 | -4.470286 | -0.121575 |
| 1 | -7.196817 | -3.506340 | -1.530475 |
| 1 | -6.000422 | -2.244416 | -2.173583 |
| 6 | 4.455575  | -1.916665 | 0.000739  |
| 6 | 5.151211  | -1.766703 | -1.375957 |
| 1 | 4.839132  | -2.819626 | 0.490350  |
| 1 | 4.735848  | -1.068342 | 0.636893  |
| 1 | 4.861802  | -2.596635 | -2.024562 |
| 1 | 4.841048  | -0.828216 | -1.843001 |
| 6 | 3.660575  | 3.313356  | -0.936360 |
| 6 | 4.496284  | 3.151805  | 0.357685  |
| 1 | 3.701131  | 4.363915  | -1.241415 |
| 1 | 4.144469  | 2.750833  | -1.741580 |
| 1 | 5.183106  | 4.003739  | 0.455236  |
| 1 | 3.857670  | 3.148646  | 1.242106  |
| 6 | 6.638813  | -1.750291 | -1.194945 |
| 8 | 7.311899  | -0.789462 | -0.863824 |
| 8 | 7.210252  | -2.950829 | -1.373303 |
| 1 | 8.153836  | -2.833455 | -1.175088 |
| 6 | 5.378588  | 1.924357  | 0.449405  |
| 8 | 5.632661  | 1.338039  | 1.480528  |
| 8 | 5.904158  | 1.575119  | -0.731628 |
| 1 | 6.458398  | 0.767999  | -0.615135 |
| 6 | -4.356176 | 0.038362  | 2.679782  |
| 6 | -5.221993 | -1.203596 | 2.722038  |
| 1 | -4.699575 | 0.746517  | 1.920325  |
| 1 | -4.334821 | 0.557689  | 3.644276  |
| 1 | -6.253164 | -0.930436 | 2.971285  |
| 1 | -5.214094 | -1.703422 | 1.749414  |
| 1 | -4.857386 | -1.907715 | 3.477421  |

---

**W-<sup>10SS</sup>TS(C-D) Fe(his)**

---

Number of imaginary frequencies: 1    Electronic energy:    HF=-3047.667639  
Zero-point correction=                    0.853726 (Hartree/Particle)  
Thermal correction to Energy=            0.910506  
Thermal correction to Enthalpy=         0.911450  
Thermal correction to Gibbs Free Energy= 0.763415  
Sum of electronic and zero-point Energies= -3046.813913  
Sum of electronic and thermal Energies= -3046.757133  
Sum of electronic and thermal Enthalpies= -3046.756189  
Sum of electronic and thermal Free Energies= -3046.904224

Cartesian Coordinates

|    |           |           |           |
|----|-----------|-----------|-----------|
| 6  | 2.893530  | 1.209769  | 3.285518  |
| 6  | 1.975238  | 2.185974  | 2.904511  |
| 6  | 0.743329  | 1.819527  | 2.372858  |
| 6  | 0.379692  | 0.476738  | 2.218844  |
| 6  | 1.287056  | -0.486147 | 2.702876  |
| 6  | 2.537095  | -0.131069 | 3.198942  |
| 6  | -0.868033 | 0.036696  | 1.543124  |
| 8  | 0.998083  | -1.828776 | 2.674332  |
| 6  | -0.354071 | -2.139495 | 2.737158  |
| 26 | -0.850694 | -0.092395 | -0.524793 |
| 7  | -2.498563 | 1.065127  | -0.654205 |
| 6  | -2.519723 | 2.417152  | -0.686954 |
| 6  | -3.886998 | 2.904480  | -0.747892 |
| 6  | -4.688817 | 1.795156  | -0.759454 |
| 6  | -3.798293 | 0.658208  | -0.708985 |
| 6  | -1.399426 | 3.239486  | -0.709643 |
| 6  | -0.085002 | 2.817161  | -0.710377 |
| 7  | 0.336731  | 1.526780  | -0.630527 |
| 6  | 1.692752  | 1.568788  | -0.642801 |
| 6  | 2.166773  | 2.938182  | -0.762051 |
| 6  | 1.053775  | 3.718956  | -0.787752 |
| 6  | -4.221078 | -0.659198 | -0.710558 |
| 6  | -3.395349 | -1.767698 | -0.626624 |
| 7  | -2.043560 | -1.721450 | -0.493553 |
| 6  | -1.619603 | -3.009376 | -0.408210 |
| 6  | -2.739660 | -3.917877 | -0.449214 |
| 6  | -3.856708 | -3.145648 | -0.612038 |
| 6  | 2.519019  | 0.468553  | -0.511196 |
| 6  | 2.082527  | -0.837772 | -0.373675 |
| 7  | 0.790086  | -1.244090 | -0.415175 |
| 6  | 0.812567  | -2.601172 | -0.304053 |
| 6  | 2.176279  | -3.075740 | -0.154890 |
| 6  | 2.967542  | -1.971080 | -0.186353 |
| 6  | -0.295605 | -3.424506 | -0.311330 |
| 6  | -2.101521 | 0.609771  | 2.107088  |
| 8  | -3.084693 | -0.322676 | 2.217541  |
| 8  | -2.288214 | 1.763148  | 2.453845  |
| 1  | -0.119463 | -4.493146 | -0.229554 |
| 1  | -5.288175 | -0.840566 | -0.759485 |
| 1  | -1.572074 | 4.309124  | -0.766812 |
| 1  | 3.586569  | 0.638565  | -0.518264 |
| 1  | 0.039523  | 2.575444  | 2.044401  |
| 1  | 2.223478  | 3.240408  | 3.000765  |
| 1  | 3.212595  | -0.919978 | 3.515834  |
| 1  | 3.881002  | 1.484443  | 3.643760  |
| 1  | -0.812986 | -1.916068 | 3.707135  |
| 1  | -0.901381 | -1.204388 | 1.865887  |
| 1  | -0.527651 | -3.144850 | 2.362079  |

|    |           |           |           |
|----|-----------|-----------|-----------|
| 6  | 0.815395  | -0.145790 | -3.451890 |
| 1  | 1.422571  | -0.953590 | -3.028599 |
| 1  | 0.816750  | -0.245707 | -4.543114 |
| 1  | 1.286071  | 0.808473  | -3.191157 |
| 16 | -0.903468 | -0.223953 | -2.863241 |
| 6  | 0.940138  | 5.208226  | -0.879356 |
| 1  | 1.923376  | 5.687369  | -0.907231 |
| 1  | 0.394119  | 5.513371  | -1.780241 |
| 1  | 0.398636  | 5.615591  | -0.016795 |
| 6  | 2.563679  | -4.506554 | 0.042704  |
| 1  | 2.207259  | -5.135906 | -0.781801 |
| 1  | 3.650386  | -4.623685 | 0.101536  |
| 1  | 2.133944  | -4.905254 | 0.969750  |
| 6  | -2.641209 | -5.409653 | -0.381181 |
| 1  | -2.115851 | -5.736705 | 0.524697  |
| 1  | -3.631765 | -5.874542 | -0.381578 |
| 1  | -2.090042 | -5.812071 | -1.240204 |
| 6  | -6.182780 | 1.720729  | -0.753570 |
| 1  | -6.590485 | 1.570365  | -1.761798 |
| 1  | -6.536756 | 0.891627  | -0.130656 |
| 1  | -6.611129 | 2.648021  | -0.359041 |
| 6  | -4.268308 | 4.313380  | -0.740123 |
| 6  | -5.323490 | 4.848269  | -1.364290 |
| 1  | -3.626331 | 4.975836  | -0.159492 |
| 1  | -5.547340 | 5.908053  | -1.279492 |
| 1  | -5.979544 | 4.255274  | -1.995221 |
| 6  | -5.233157 | -3.627461 | -0.736605 |
| 6  | -6.172642 | -3.152717 | -1.561062 |
| 1  | -5.494493 | -4.475027 | -0.101129 |
| 1  | -7.171558 | -3.579920 | -1.575789 |
| 1  | -5.969079 | -2.344775 | -2.257852 |
| 6  | 4.452754  | -1.874498 | -0.029340 |
| 6  | 5.167676  | -1.710155 | -1.394049 |
| 1  | 4.835330  | -2.776630 | 0.460753  |
| 1  | 4.712905  | -1.028117 | 0.617731  |
| 1  | 4.904406  | -2.549690 | -2.042880 |
| 1  | 4.849724  | -0.780228 | -1.871505 |
| 6  | 3.604664  | 3.359866  | -0.871063 |
| 6  | 4.460414  | 3.115774  | 0.395818  |
| 1  | 3.631741  | 4.427729  | -1.109546 |
| 1  | 4.074405  | 2.853437  | -1.720459 |
| 1  | 5.091935  | 3.993198  | 0.589469  |
| 1  | 3.830270  | 2.976349  | 1.276017  |
| 6  | 6.653900  | -1.669519 | -1.199661 |
| 8  | 7.333791  | -0.673099 | -1.028650 |
| 8  | 7.213859  | -2.888428 | -1.175014 |
| 1  | 8.155341  | -2.750747 | -0.980523 |
| 6  | 5.416149  | 1.941079  | 0.361597  |
| 8  | 5.778390  | 1.331692  | 1.345379  |
| 8  | 5.867620  | 1.661091  | -0.868911 |

|   |           |           |           |
|---|-----------|-----------|-----------|
| 1 | 6.466575  | 0.879677  | -0.815121 |
| 6 | -4.353592 | 0.163246  | 2.631530  |
| 6 | -5.297929 | -1.022864 | 2.673143  |
| 1 | -4.696932 | 0.926469  | 1.924287  |
| 1 | -4.263848 | 0.642012  | 3.613478  |
| 1 | -6.298164 | -0.699746 | 2.983913  |
| 1 | -5.368342 | -1.491213 | 1.686981  |
| 1 | -4.939225 | -1.776021 | 3.382554  |

---

**W-<sup>3</sup>TS(C-D)<sub>Fe(his)</sub>**

---

Number of imaginary frequencies: 1    Electronic energy:    HF=-3047.6628451  
Zero-point correction=                    0.853385 (Hartree/Particle)  
Thermal correction to Energy=            0.910306  
Thermal correction to Enthalpy=         0.911250  
Thermal correction to Gibbs Free Energy= 0.761755  
Sum of electronic and zero-point Energies= -3046.809460  
Sum of electronic and thermal Energies= -3046.752539  
Sum of electronic and thermal Enthalpies= -3046.751595  
Sum of electronic and thermal Free Energies= -3046.901090

---

Cartesian Coordinates

---

|    |           |           |           |
|----|-----------|-----------|-----------|
| 6  | 2.923589  | 1.150956  | 3.257636  |
| 6  | 1.998860  | 2.132573  | 2.906924  |
| 6  | 0.755869  | 1.773233  | 2.396432  |
| 6  | 0.387053  | 0.432286  | 2.232170  |
| 6  | 1.303437  | -0.538702 | 2.686748  |
| 6  | 2.563310  | -0.188497 | 3.162288  |
| 6  | -0.868964 | -0.001463 | 1.575576  |
| 8  | 1.015859  | -1.880211 | 2.652768  |
| 6  | -0.340671 | -2.198130 | 2.731334  |
| 26 | -0.854581 | -0.086453 | -0.558900 |
| 7  | -2.496290 | 1.073143  | -0.647625 |
| 6  | -2.518413 | 2.425604  | -0.660444 |
| 6  | -3.885978 | 2.912887  | -0.708543 |
| 6  | -4.688101 | 1.804438  | -0.733980 |
| 6  | -3.798891 | 0.666203  | -0.703223 |
| 6  | -1.400327 | 3.250627  | -0.679311 |
| 6  | -0.086797 | 2.825874  | -0.689068 |
| 7  | 0.331166  | 1.534099  | -0.627237 |
| 6  | 1.689843  | 1.574942  | -0.640761 |
| 6  | 2.165200  | 2.945160  | -0.746088 |
| 6  | 1.053592  | 3.727334  | -0.758402 |
| 6  | -4.225402 | -0.647344 | -0.721110 |
| 6  | -3.401784 | -1.760524 | -0.649119 |
| 7  | -2.051487 | -1.714929 | -0.520637 |
| 6  | -1.628112 | -3.003270 | -0.436591 |
| 6  | -2.748103 | -3.910829 | -0.475984 |

|    |           |           |           |
|----|-----------|-----------|-----------|
| 6  | -3.865348 | -3.137175 | -0.635719 |
| 6  | 2.514766  | 0.475887  | -0.521042 |
| 6  | 2.076009  | -0.832780 | -0.389765 |
| 7  | 0.784705  | -1.236549 | -0.436995 |
| 6  | 0.804233  | -2.595186 | -0.324673 |
| 6  | 2.165935  | -3.070054 | -0.168020 |
| 6  | 2.958789  | -1.966034 | -0.197947 |
| 6  | -0.303797 | -3.416864 | -0.337148 |
| 6  | -2.094281 | 0.588889  | 2.127659  |
| 8  | -3.095154 | -0.330202 | 2.217468  |
| 8  | -2.272468 | 1.742305  | 2.483285  |
| 1  | -0.127682 | -4.485441 | -0.253748 |
| 1  | -5.293221 | -0.824510 | -0.768263 |
| 1  | -1.573846 | 4.320639  | -0.721441 |
| 1  | 3.582424  | 0.644851  | -0.526198 |
| 1  | 0.046143  | 2.533497  | 2.091292  |
| 1  | 2.250155  | 3.185726  | 3.010552  |
| 1  | 3.243788  | -0.981698 | 3.457646  |
| 1  | 3.918327  | 1.420187  | 3.599929  |
| 1  | -0.766023 | -2.021449 | 3.727045  |
| 1  | -0.899066 | -1.274284 | 1.925779  |
| 1  | -0.505608 | -3.201150 | 2.343790  |
| 6  | 0.784094  | 0.063748  | -3.475065 |
| 1  | 1.510185  | -0.638821 | -3.051784 |
| 1  | 0.790645  | -0.043702 | -4.565361 |
| 1  | 1.103650  | 1.080367  | -3.222914 |
| 16 | -0.895401 | -0.277978 | -2.869829 |
| 6  | 0.940977  | 5.217683  | -0.829429 |
| 1  | 1.924459  | 5.696298  | -0.856351 |
| 1  | 0.389927  | 5.535534  | -1.722863 |
| 1  | 0.404594  | 5.613242  | 0.041728  |
| 6  | 2.550865  | -4.499650 | 0.041967  |
| 1  | 2.186405  | -5.137486 | -0.772343 |
| 1  | 3.637636  | -4.619054 | 0.093819  |
| 1  | 2.127179  | -4.885120 | 0.977327  |
| 6  | -2.651030 | -5.402641 | -0.406508 |
| 1  | -2.126877 | -5.729005 | 0.500285  |
| 1  | -3.642002 | -5.866606 | -0.407079 |
| 1  | -2.099652 | -5.806665 | -1.264631 |
| 6  | -6.182025 | 1.730707  | -0.721001 |
| 1  | -6.594796 | 1.587201  | -1.728110 |
| 1  | -6.532710 | 0.897590  | -0.101648 |
| 1  | -6.607632 | 2.655455  | -0.317884 |
| 6  | -4.267031 | 4.321705  | -0.676910 |
| 6  | -5.321233 | 4.866476  | -1.293943 |
| 1  | -3.626038 | 4.973733  | -0.083629 |
| 1  | -5.546100 | 5.924482  | -1.191627 |
| 1  | -5.975963 | 4.283459  | -1.935547 |
| 6  | -5.242825 | -3.616544 | -0.755781 |
| 6  | -6.186492 | -3.135650 | -1.571962 |

|   |           |           |           |
|---|-----------|-----------|-----------|
| 1 | -5.501876 | -4.467364 | -0.123778 |
| 1 | -7.186157 | -3.561149 | -1.583213 |
| 1 | -5.986083 | -2.323829 | -2.265193 |
| 6 | 4.442555  | -1.869469 | -0.027167 |
| 6 | 5.170413  | -1.704209 | -1.384679 |
| 1 | 4.820650  | -2.771493 | 0.466198  |
| 1 | 4.695411  | -1.023393 | 0.623234  |
| 1 | 4.915959  | -2.546504 | -2.033928 |
| 1 | 4.854306  | -0.776919 | -1.868212 |
| 6 | 3.603724  | 3.364726  | -0.855296 |
| 6 | 4.463784  | 3.098376  | 0.404001  |
| 1 | 3.632985  | 4.435752  | -1.078810 |
| 1 | 4.067342  | 2.868726  | -1.714135 |
| 1 | 5.085245  | 3.977331  | 0.621237  |
| 1 | 3.836100  | 2.928969  | 1.280780  |
| 6 | 6.655448  | -1.659325 | -1.180924 |
| 8 | 7.339599  | -0.658983 | -1.056520 |
| 8 | 7.209097  | -2.878228 | -1.093675 |
| 1 | 8.149732  | -2.735913 | -0.898636 |
| 6 | 5.431769  | 1.934983  | 0.340624  |
| 8 | 5.814491  | 1.318474  | 1.312214  |
| 8 | 5.867517  | 1.671977  | -0.899272 |
| 1 | 6.473186  | 0.894774  | -0.860260 |
| 6 | -4.357660 | 0.170307  | 2.630426  |
| 6 | -5.320358 | -1.001680 | 2.655934  |
| 1 | -4.687594 | 0.946431  | 1.930638  |
| 1 | -4.266416 | 0.637624  | 3.617860  |
| 1 | -6.317189 | -0.666852 | 2.965523  |
| 1 | -5.393448 | -1.459712 | 1.665050  |
| 1 | -4.976074 | -1.767250 | 3.359169  |

---

**W-<sup>1</sup>CSSS\*TS(C-D)<sub>Fe</sub>**

---

Number of imaginary frequencies: 1    Electronic energy:    HF=-2609.5220952  
Zero-point correction=                    0.816893 (Hartree/Particle)  
Thermal correction to Energy=            0.870382  
Thermal correction to Enthalpy=         0.871326  
Thermal correction to Gibbs Free Energy= 0.727229  
Sum of electronic and zero-point Energies= -2608.705202  
Sum of electronic and thermal Energies= -2608.651714  
Sum of electronic and thermal Enthalpies= -2608.650769  
Sum of electronic and thermal Free Energies= -2608.794866

.....  
Cartesian Coordinates

.....  
6        3.523039   -3.268377   -1.318352  
6        2.218931   -2.729475   -0.997993  
7        2.227748   -1.362450   -1.052084

|   |           |           |           |
|---|-----------|-----------|-----------|
| 6 | 3.497173  | -1.013352 | -1.414893 |
| 6 | 4.324436  | -2.194487 | -1.591576 |
| 6 | 1.115325  | -3.508466 | -0.696353 |
| 6 | -0.158468 | -3.035742 | -0.424249 |
| 7 | -0.525977 | -1.721368 | -0.408337 |
| 6 | -1.847269 | -1.706257 | -0.060279 |
| 6 | -2.334348 | -3.051472 | 0.155270  |
| 6 | -1.278653 | -3.883296 | -0.085528 |
| 6 | -2.614440 | -0.561473 | 0.068996  |
| 6 | -2.169932 | 0.730399  | -0.151498 |
| 7 | -0.882700 | 1.080331  | -0.446220 |
| 6 | -0.881109 | 2.440528  | -0.557363 |
| 6 | -2.208373 | 2.973971  | -0.342141 |
| 6 | -3.013722 | 1.906184  | -0.085540 |
| 6 | 0.229178  | 3.231337  | -0.798628 |
| 6 | 1.515580  | 2.767772  | -1.009345 |
| 7 | 1.859950  | 1.450414  | -1.094975 |
| 6 | 3.188712  | 1.429053  | -1.408164 |
| 6 | 3.713402  | 2.767675  | -1.516829 |
| 6 | 2.674268  | 3.611873  | -1.241465 |
| 6 | 3.950911  | 0.283931  | -1.577907 |
| 1 | 0.078318  | 4.303600  | -0.836077 |
| 1 | 4.987749  | 0.420228  | -1.866103 |
| 1 | 1.253322  | -4.584783 | -0.689111 |
| 1 | -3.648896 | -0.686579 | 0.366126  |
| 6 | -4.500602 | 1.901328  | 0.094412  |
| 1 | -4.812872 | 1.090871  | 0.761054  |
| 1 | -4.821219 | 2.834398  | 0.571646  |
| 6 | -5.208097 | 1.756506  | -1.271603 |
| 1 | -4.952424 | 0.787362  | -1.718006 |
| 1 | -4.880586 | 2.546286  | -1.950522 |
| 6 | -6.704267 | 1.843683  | -1.170510 |
| 8 | -7.427854 | 2.650293  | -1.693101 |
| 8 | -7.217252 | 0.863514  | -0.366659 |
| 1 | -8.181787 | 0.975428  | -0.368217 |
| 6 | -3.725539 | -3.441562 | 0.559274  |
| 1 | -4.099893 | -2.780249 | 1.347582  |
| 1 | -3.691612 | -4.442939 | 0.999419  |
| 6 | -4.743895 | -3.471045 | -0.605158 |
| 1 | -4.284221 | -3.860719 | -1.515435 |
| 1 | -5.575840 | -4.129028 | -0.326960 |
| 6 | -5.349590 | -2.124595 | -0.924180 |
| 8 | -5.317482 | -1.572267 | -2.000618 |
| 8 | -5.963731 | -1.598506 | 0.149057  |
| 1 | -6.376302 | -0.748961 | -0.113451 |
| 6 | -1.219061 | -5.377417 | -0.017905 |
| 1 | -2.179743 | -5.807126 | 0.278522  |
| 1 | -0.952085 | -5.808911 | -0.989697 |
| 1 | -0.467312 | -5.715614 | 0.705899  |
| 6 | -2.564029 | 4.425288  | -0.409225 |

|    |           |           |           |
|----|-----------|-----------|-----------|
| 1  | -2.376666 | 4.836882  | -1.407724 |
| 1  | -3.619740 | 4.590817  | -0.175992 |
| 1  | -1.968446 | 5.010851  | 0.301517  |
| 6  | 3.883491  | -4.719523 | -1.301921 |
| 1  | 3.385294  | -5.245598 | -0.480610 |
| 1  | 3.596320  | -5.220361 | -2.234899 |
| 1  | 4.963327  | -4.845475 | -1.178514 |
| 6  | 5.140451  | 3.109492  | -1.805619 |
| 1  | 5.800958  | 2.737916  | -1.013051 |
| 1  | 5.476799  | 2.666534  | -2.750327 |
| 1  | 5.284357  | 4.191222  | -1.871623 |
| 6  | 5.740362  | -2.170787 | -1.957443 |
| 6  | 6.359345  | -3.069013 | -2.728956 |
| 1  | 6.328111  | -1.343790 | -1.559448 |
| 1  | 7.422015  | -2.991144 | -2.937495 |
| 1  | 5.825656  | -3.891942 | -3.195535 |
| 6  | 2.728674  | 5.074428  | -1.179922 |
| 6  | 2.117952  | 5.839050  | -0.270326 |
| 1  | 3.349753  | 5.559169  | -1.932939 |
| 1  | 2.216011  | 6.920381  | -0.294150 |
| 1  | 1.527983  | 5.409434  | 0.534564  |
| 6  | 1.137947  | 0.021040  | 1.499913  |
| 6  | 1.234924  | 1.358337  | 2.096716  |
| 6  | 0.612677  | -1.084192 | 2.318782  |
| 6  | 0.081738  | 2.054136  | 2.473663  |
| 6  | 2.468688  | 2.023677  | 2.167798  |
| 8  | -0.516179 | -1.015519 | 2.761496  |
| 8  | 1.408051  | -2.154466 | 2.385436  |
| 6  | 0.164892  | 3.377818  | 2.896409  |
| 1  | -0.876477 | 1.552188  | 2.404357  |
| 6  | 2.555791  | 3.339939  | 2.589384  |
| 8  | 3.616424  | 1.377291  | 1.787446  |
| 6  | 1.395808  | 4.022696  | 2.948792  |
| 1  | -0.742021 | 3.899897  | 3.184807  |
| 1  | 3.530723  | 3.813378  | 2.626259  |
| 6  | 3.541966  | -0.003987 | 1.866499  |
| 1  | 1.462990  | 5.054758  | 3.279307  |
| 1  | 3.521455  | -0.381989 | 2.894386  |
| 1  | 4.343648  | -0.443385 | 1.271782  |
| 1  | 2.592648  | -0.367854 | 1.310359  |
| 6  | 0.814903  | -3.355207 | 2.911225  |
| 1  | -0.220724 | -3.410004 | 2.566013  |
| 1  | 1.389747  | -4.158737 | 2.445937  |
| 6  | 0.903985  | -3.398266 | 4.424977  |
| 1  | 0.310519  | -2.592591 | 4.864704  |
| 1  | 0.516079  | -4.353985 | 4.792699  |
| 1  | 1.942401  | -3.297575 | 4.755583  |
| 26 | 0.705185  | -0.129092 | -0.574509 |

---

W-<sup>10</sup>STS(C-D)<sub>Fe</sub>



-----

|                                              |                             |                  |
|----------------------------------------------|-----------------------------|------------------|
| Number of imaginary frequencies: 1           | Electronic energy:          | HF=-2609.5261606 |
| Zero-point correction=                       | 0.815680 (Hartree/Particle) |                  |
| Thermal correction to Energy=                | 0.868501                    |                  |
| Thermal correction to Enthalpy=              | 0.869446                    |                  |
| Thermal correction to Gibbs Free Energy=     | 0.729096                    |                  |
| Sum of electronic and zero-point Energies=   | -2608.710480                |                  |
| Sum of electronic and thermal Energies=      | -2608.657659                |                  |
| Sum of electronic and thermal Enthalpies=    | -2608.656715                |                  |
| Sum of electronic and thermal Free Energies= | -2608.797065                |                  |

.....

Cartesian Coordinates

.....

|   |           |           |           |
|---|-----------|-----------|-----------|
| 6 | 3.617337  | -3.228950 | -1.236606 |
| 6 | 2.294691  | -2.717997 | -0.974040 |
| 7 | 2.279494  | -1.345276 | -0.986243 |
| 6 | 3.568475  | -0.975173 | -1.258201 |
| 6 | 4.418717  | -2.136223 | -1.420155 |
| 6 | 1.196903  | -3.520872 | -0.741852 |
| 6 | -0.071295 | -3.060818 | -0.449631 |
| 7 | -0.431284 | -1.743473 | -0.371897 |
| 6 | -1.750910 | -1.753065 | -0.010263 |
| 6 | -2.230027 | -3.105383 | 0.172733  |
| 6 | -1.182081 | -3.923787 | -0.127089 |
| 6 | -2.536464 | -0.624635 | 0.107500  |
| 6 | -2.123247 | 0.661123  | -0.184429 |
| 7 | -0.845889 | 1.023331  | -0.524926 |
| 6 | -0.884393 | 2.383945  | -0.674055 |
| 6 | -2.217202 | 2.890796  | -0.471909 |
| 6 | -2.991882 | 1.814967  | -0.158259 |
| 6 | 0.206570  | 3.200182  | -0.900954 |
| 6 | 1.507392  | 2.761599  | -1.021409 |
| 7 | 1.880323  | 1.445967  | -1.025231 |
| 6 | 3.223941  | 1.452058  | -1.277376 |
| 6 | 3.722864  | 2.798989  | -1.414154 |
| 6 | 2.654300  | 3.625676  | -1.228676 |
| 6 | 4.014069  | 0.325713  | -1.394211 |
| 1 | 0.029907  | 4.266185  | -0.976179 |
| 1 | 5.062053  | 0.476144  | -1.629541 |
| 1 | 1.343278  | -4.595179 | -0.775325 |
| 1 | -3.564292 | -0.760702 | 0.421876  |
| 6 | -4.474296 | 1.792442  | 0.054094  |
| 1 | -4.763585 | 0.981760  | 0.730048  |
| 1 | -4.793747 | 2.723348  | 0.536148  |
| 6 | -5.208030 | 1.636752  | -1.296526 |
| 1 | -4.950888 | 0.668993  | -1.745001 |
| 1 | -4.904302 | 2.428500  | -1.984186 |
| 6 | -6.702795 | 1.707160  | -1.163812 |
| 8 | -7.446341 | 2.502493  | -1.675185 |

|   |           |           |           |
|---|-----------|-----------|-----------|
| 8 | -7.185747 | 0.724391  | -0.345261 |
| 1 | -8.151451 | 0.823837  | -0.324218 |
| 6 | -3.608688 | -3.514603 | 0.598769  |
| 1 | -3.982594 | -2.854361 | 1.388018  |
| 1 | -3.549768 | -4.511763 | 1.045852  |
| 6 | -4.641594 | -3.571638 | -0.551368 |
| 1 | -4.189833 | -3.972224 | -1.460911 |
| 1 | -5.464608 | -4.230885 | -0.251249 |
| 6 | -5.257871 | -2.233258 | -0.882050 |
| 8 | -5.222790 | -1.686215 | -1.961274 |
| 8 | -5.881351 | -1.706931 | 0.185231  |
| 1 | -6.307451 | -0.866152 | -0.083567 |
| 6 | -1.118080 | -5.418793 | -0.118742 |
| 1 | -0.833957 | -5.811070 | -1.102099 |
| 1 | -0.378597 | -5.782832 | 0.605133  |
| 1 | -2.083008 | -5.860906 | 0.143537  |
| 6 | -2.605065 | 4.331579  | -0.573447 |
| 1 | -2.383057 | 4.738457  | -1.566484 |
| 1 | -3.673891 | 4.472547  | -0.389760 |
| 1 | -2.056774 | 4.935804  | 0.159573  |
| 6 | 3.996445  | -4.675479 | -1.247349 |
| 1 | 3.478287  | -5.229938 | -0.457858 |
| 1 | 3.749238  | -5.153767 | -2.203256 |
| 1 | 5.072662  | -4.790030 | -1.088597 |
| 6 | 5.154799  | 3.162679  | -1.641343 |
| 1 | 5.776922  | 2.842042  | -0.797262 |
| 1 | 5.552910  | 2.688628  | -2.546029 |
| 1 | 5.276549  | 4.243926  | -1.746172 |
| 6 | 5.855048  | -2.083370 | -1.694071 |
| 6 | 6.524711  | -2.933698 | -2.476893 |
| 1 | 6.410544  | -1.279870 | -1.211074 |
| 1 | 7.597596  | -2.842133 | -2.615560 |
| 1 | 6.024277  | -3.730363 | -3.019899 |
| 6 | 2.663917  | 5.091075  | -1.224395 |
| 6 | 1.999142  | 5.867416  | -0.364225 |
| 1 | 3.295871  | 5.566094  | -1.974380 |
| 1 | 2.065806  | 6.949709  | -0.423513 |
| 1 | 1.396652  | 5.448103  | 0.437268  |
| 6 | 1.126295  | 0.062357  | 1.374349  |
| 6 | 0.989410  | 1.420797  | 1.966214  |
| 6 | 0.570530  | -1.061287 | 2.178361  |
| 6 | -0.238101 | 1.971339  | 2.353318  |
| 6 | 2.132383  | 2.226728  | 2.112394  |
| 8 | -0.461102 | -1.031430 | 2.817359  |
| 8 | 1.371678  | -2.142994 | 2.120964  |
| 6 | -0.332360 | 3.276662  | 2.818714  |
| 1 | -1.125367 | 1.354987  | 2.268528  |
| 6 | 2.048566  | 3.540258  | 2.562579  |
| 8 | 3.381243  | 1.769641  | 1.773124  |
| 6 | 0.811329  | 4.068697  | 2.909240  |

|    |           |           |           |
|----|-----------|-----------|-----------|
| 1  | -1.300720 | 3.676008  | 3.104642  |
| 1  | 2.959587  | 4.125049  | 2.633720  |
| 6  | 3.578735  | 0.414329  | 1.928731  |
| 1  | 0.745038  | 5.092963  | 3.265200  |
| 1  | 3.534440  | 0.065367  | 2.965061  |
| 1  | 4.428923  | 0.075804  | 1.343465  |
| 1  | 2.385702  | -0.104069 | 1.378189  |
| 6  | 0.885887  | -3.329920 | 2.755410  |
| 1  | -0.190302 | -3.411102 | 2.579371  |
| 1  | 1.395459  | -4.143644 | 2.232780  |
| 6  | 1.204145  | -3.336123 | 4.240041  |
| 1  | 0.672634  | -2.524881 | 4.743622  |
| 1  | 0.892345  | -4.286388 | 4.686761  |
| 1  | 2.279498  | -3.213811 | 4.403923  |
| 26 | 0.763286  | -0.133274 | -0.515074 |

---

**W-<sup>3</sup>TS(C-D)<sub>Fe</sub>**

---

Number of imaginary frequencies: 1    Electronic energy:    HF=-2609.5256022  
Zero-point correction=                    0.819583 (Hartree/Particle)  
Thermal correction to Energy=            0.871791  
Thermal correction to Enthalpy=         0.872735  
Thermal correction to Gibbs Free Energy= 0.734230  
Sum of electronic and zero-point Energies= -2608.706020  
Sum of electronic and thermal Energies= -2608.653811  
Sum of electronic and thermal Enthalpies= -2608.652867  
Sum of electronic and thermal Free Energies= -2608.791372

.....  
Cartesian Coordinates

.....

|   |           |           |           |
|---|-----------|-----------|-----------|
| 6 | 3.570455  | -3.236820 | -1.305048 |
| 6 | 2.262710  | -2.711920 | -0.982309 |
| 7 | 2.262414  | -1.342123 | -1.004746 |
| 6 | 3.535824  | -0.980295 | -1.350073 |
| 6 | 4.370486  | -2.152680 | -1.543746 |
| 6 | 1.160152  | -3.500727 | -0.702566 |
| 6 | -0.108992 | -3.036630 | -0.402897 |
| 7 | -0.472691 | -1.721938 | -0.338984 |
| 6 | -1.792584 | -1.722201 | 0.013790  |
| 6 | -2.275826 | -3.076564 | 0.204031  |
| 6 | -1.225396 | -3.898346 | -0.075860 |
| 6 | -2.573342 | -0.586809 | 0.134223  |
| 6 | -2.156131 | 0.706622  | -0.134358 |
| 7 | -0.877338 | 1.067169  | -0.449655 |
| 6 | -0.903255 | 2.423289  | -0.605959 |
| 6 | -2.239703 | 2.940371  | -0.412530 |
| 6 | -3.023271 | 1.868110  | -0.110585 |
| 6 | 0.200412  | 3.225482  | -0.840809 |
| 6 | 1.499742  | 2.779068  | -0.995059 |
| 7 | 1.865700  | 1.464063  | -1.035525 |

|   |           |           |           |
|---|-----------|-----------|-----------|
| 6 | 3.199286  | 1.460631  | -1.332057 |
| 6 | 3.706725  | 2.807509  | -1.457427 |
| 6 | 2.650780  | 3.639182  | -1.220445 |
| 6 | 3.978342  | 0.324908  | -1.488188 |
| 1 | 0.033721  | 4.293982  | -0.912336 |
| 1 | 5.017116  | 0.474804  | -1.763282 |
| 1 | 1.298651  | -4.576895 | -0.729096 |
| 1 | -3.605198 | -0.723318 | 0.436988  |
| 6 | -4.509678 | 1.846362  | 0.072921  |
| 1 | -4.810897 | 1.038114  | 0.747100  |
| 1 | -4.841479 | 2.779575  | 0.542540  |
| 6 | -5.217425 | 1.680864  | -1.290507 |
| 1 | -4.948647 | 0.711446  | -1.728476 |
| 1 | -4.901871 | 2.469215  | -1.976719 |
| 6 | -6.714467 | 1.747211  | -1.188948 |
| 8 | -7.451105 | 2.533984  | -1.723655 |
| 8 | -7.211831 | 0.771953  | -0.369423 |
| 1 | -8.178006 | 0.868306  | -0.372639 |
| 6 | -3.661293 | -3.480980 | 0.612871  |
| 1 | -4.043137 | -2.820165 | 1.397998  |
| 1 | -3.614054 | -4.479697 | 1.058301  |
| 6 | -4.680582 | -3.530578 | -0.549833 |
| 1 | -4.218171 | -3.927244 | -1.455708 |
| 1 | -5.508114 | -4.190680 | -0.263599 |
| 6 | -5.293946 | -2.191428 | -0.883077 |
| 8 | -5.258527 | -1.646979 | -1.963524 |
| 8 | -5.920231 | -1.662609 | 0.181719  |
| 1 | -6.340632 | -0.820178 | -0.090755 |
| 6 | -1.163616 | -5.393648 | -0.057296 |
| 1 | -2.121597 | -5.833528 | 0.233449  |
| 1 | -0.905100 | -5.793732 | -1.044801 |
| 1 | -0.405271 | -5.755263 | 0.648411  |
| 6 | -2.624522 | 4.380733  | -0.536258 |
| 1 | -2.437576 | 4.759180  | -1.547917 |
| 1 | -3.685394 | 4.532904  | -0.317191 |
| 1 | -2.047599 | 5.005661  | 0.156341  |
| 6 | 3.937607  | -4.686533 | -1.322662 |
| 1 | 3.428486  | -5.237560 | -0.524745 |
| 1 | 3.668486  | -5.162969 | -2.273680 |
| 1 | 5.015888  | -4.811607 | -1.184770 |
| 6 | 5.132207  | 3.164374  | -1.735857 |
| 1 | 5.793727  | 2.797578  | -0.941721 |
| 1 | 5.478420  | 2.726878  | -2.679747 |
| 1 | 5.265447  | 4.247691  | -1.798961 |
| 6 | 5.789307  | -2.113695 | -1.896550 |
| 6 | 6.422608  | -2.994509 | -2.676628 |
| 1 | 6.367351  | -1.288470 | -1.480857 |
| 1 | 7.486410  | -2.904471 | -2.874323 |
| 1 | 5.900102  | -3.814219 | -3.161092 |
| 6 | 2.678175  | 5.103142  | -1.181916 |

|    |           |           |           |
|----|-----------|-----------|-----------|
| 6  | 2.030735  | 5.869542  | -0.299303 |
| 1  | 3.309723  | 5.588754  | -1.925633 |
| 1  | 2.109639  | 6.952093  | -0.335781 |
| 1  | 1.426345  | 5.440751  | 0.495563  |
| 6  | 1.167630  | 0.063008  | 1.413426  |
| 6  | 1.124204  | 1.421444  | 2.010432  |
| 6  | 0.632742  | -1.053899 | 2.236080  |
| 6  | -0.045322 | 2.089811  | 2.360370  |
| 6  | 2.338267  | 2.086868  | 2.183342  |
| 8  | -0.431782 | -0.988623 | 2.807165  |
| 8  | 1.430940  | -2.131810 | 2.222167  |
| 6  | 0.021058  | 3.395092  | 2.844925  |
| 1  | -0.998318 | 1.588189  | 2.241980  |
| 6  | 2.428892  | 3.385885  | 2.642574  |
| 8  | 3.469763  | 1.381613  | 1.815578  |
| 6  | 1.245233  | 4.044922  | 2.973462  |
| 1  | -0.897053 | 3.906317  | 3.116644  |
| 1  | 3.398730  | 3.860619  | 2.738578  |
| 6  | 3.244315  | 0.043475  | 1.865658  |
| 1  | 1.287601  | 5.064976  | 3.342773  |
| 1  | 3.078535  | -0.378532 | 2.856984  |
| 1  | 3.968081  | -0.505011 | 1.260375  |
| 1  | 2.293207  | -0.239460 | 1.009693  |
| 6  | 0.892611  | -3.332997 | 2.798431  |
| 1  | -0.170640 | -3.389133 | 2.552289  |
| 1  | 1.421448  | -4.136003 | 2.280604  |
| 6  | 1.124234  | -3.376826 | 4.297180  |
| 1  | 0.575738  | -2.570712 | 4.791068  |
| 1  | 0.771857  | -4.332098 | 4.700090  |
| 1  | 2.189820  | -3.278998 | 4.528482  |
| 26 | 0.723750  | -0.119478 | -0.546925 |

-----  
**1CSSS<sup>+</sup>TS(C-D)<sub>Fe</sub>**  
 -----

Number of imaginary frequencies: 1    Electronic energy:    HF=-2610.2775955  
 Zero-point correction=                    0.807751 (Hartree/Particle)  
 Thermal correction to Energy=            0.861551  
 Thermal correction to Enthalpy=         0.862495  
 Thermal correction to Gibbs Free Energy= 0.718544  
 Sum of electronic and zero-point Energies= -2609.469844  
 Sum of electronic and thermal Energies= -2609.416045  
 Sum of electronic and thermal Enthalpies= -2609.415101  
 Sum of electronic and thermal Free Energies= -2609.559052

-----  
 Cartesian Coordinates  
 -----

|   |          |           |           |
|---|----------|-----------|-----------|
| 6 | 3.523516 | -3.254025 | -1.432751 |
| 6 | 2.238254 | -2.722375 | -1.034162 |
| 7 | 2.249962 | -1.344155 | -1.028091 |

|   |           |           |           |
|---|-----------|-----------|-----------|
| 6 | 3.515079  | -0.986913 | -1.432735 |
| 6 | 4.331067  | -2.166788 | -1.690377 |
| 6 | 1.132037  | -3.505482 | -0.726846 |
| 6 | -0.129843 | -3.037747 | -0.390112 |
| 7 | -0.483603 | -1.713045 | -0.287858 |
| 6 | -1.815716 | -1.713448 | 0.048009  |
| 6 | -2.314774 | -3.073754 | 0.189726  |
| 6 | -1.260578 | -3.900121 | -0.098564 |
| 6 | -2.595980 | -0.571357 | 0.170405  |
| 6 | -2.174184 | 0.727257  | -0.088496 |
| 7 | -0.881059 | 1.089057  | -0.381220 |
| 6 | -0.911763 | 2.449624  | -0.572796 |
| 6 | -2.258655 | 2.964756  | -0.416498 |
| 6 | -3.049068 | 1.889625  | -0.109132 |
| 6 | 0.188985  | 3.247645  | -0.853977 |
| 6 | 1.488799  | 2.800662  | -1.045595 |
| 7 | 1.860026  | 1.479441  | -1.044350 |
| 6 | 3.179397  | 1.465563  | -1.434634 |
| 6 | 3.666919  | 2.807897  | -1.668904 |
| 6 | 2.619463  | 3.655445  | -1.396914 |
| 6 | 3.949901  | 0.321528  | -1.605460 |
| 1 | 0.014009  | 4.310194  | -0.968689 |
| 1 | 4.968775  | 0.466134  | -1.946836 |
| 1 | 1.257039  | -4.581215 | -0.785309 |
| 1 | -3.635602 | -0.709841 | 0.442500  |
| 6 | -4.540891 | 1.878563  | 0.068043  |
| 1 | -4.850940 | 1.069196  | 0.737027  |
| 1 | -4.862718 | 2.812251  | 0.545471  |
| 6 | -5.282883 | 1.733328  | -1.291770 |
| 1 | -5.035383 | 0.767300  | -1.747274 |
| 1 | -4.975162 | 2.529264  | -1.973220 |
| 6 | -6.779357 | 1.827902  | -1.143117 |
| 8 | -7.504352 | 2.705666  | -1.544358 |
| 8 | -7.292379 | 0.761847  | -0.437241 |
| 1 | -8.257135 | 0.902008  | -0.386384 |
| 6 | -3.708933 | -3.490865 | 0.571336  |
| 1 | -4.118977 | -2.828554 | 1.341213  |
| 1 | -3.656285 | -4.484565 | 1.029424  |
| 6 | -4.725039 | -3.578394 | -0.605206 |
| 1 | -4.250571 | -3.984971 | -1.500828 |
| 1 | -5.539875 | -4.250142 | -0.307262 |
| 6 | -5.359120 | -2.252742 | -0.968757 |
| 8 | -5.271919 | -1.693591 | -2.043328 |
| 8 | -6.062703 | -1.748055 | 0.070593  |
| 1 | -6.474060 | -0.899910 | -0.211918 |
| 6 | -1.226193 | -5.399493 | -0.140479 |
| 1 | -2.157264 | -5.834249 | 0.235589  |
| 1 | -1.083132 | -5.773414 | -1.163097 |
| 1 | -0.406525 | -5.806535 | 0.465330  |
| 6 | -2.657408 | 4.400407  | -0.587884 |

|    |           |           |           |
|----|-----------|-----------|-----------|
| 1  | -2.533890 | 4.736126  | -1.625892 |
| 1  | -3.705124 | 4.561047  | -0.315518 |
| 1  | -2.049083 | 5.066429  | 0.036975  |
| 6  | 3.875523  | -4.708902 | -1.506426 |
| 1  | 3.328359  | -5.295858 | -0.760796 |
| 1  | 3.646412  | -5.141835 | -2.490289 |
| 1  | 4.946159  | -4.856965 | -1.330613 |
| 6  | 5.063415  | 3.158207  | -2.086858 |
| 1  | 5.799646  | 2.863276  | -1.327231 |
| 1  | 5.345521  | 2.655218  | -3.020683 |
| 1  | 5.174641  | 4.234946  | -2.243071 |
| 6  | 5.728174  | -2.124169 | -2.110497 |
| 6  | 6.383546  | -3.042872 | -2.838003 |
| 1  | 6.289387  | -1.244509 | -1.794709 |
| 1  | 7.435422  | -2.915414 | -3.077343 |
| 1  | 5.898922  | -3.927621 | -3.238204 |
| 6  | 2.648868  | 5.116366  | -1.456863 |
| 6  | 2.016972  | 5.967996  | -0.634626 |
| 1  | 3.282980  | 5.540954  | -2.235974 |
| 1  | 2.112488  | 7.042456  | -0.764176 |
| 1  | 1.415530  | 5.626779  | 0.202846  |
| 6  | 1.242673  | 0.055576  | 1.509919  |
| 6  | 1.227240  | 1.405140  | 2.144560  |
| 6  | 0.685066  | -1.050632 | 2.341506  |
| 6  | 0.077557  | 2.086454  | 2.554570  |
| 6  | 2.461967  | 2.027126  | 2.381504  |
| 8  | -0.365753 | -0.962342 | 2.944392  |
| 8  | 1.473219  | -2.152386 | 2.343206  |
| 6  | 0.183575  | 3.341209  | 3.163844  |
| 1  | -0.890695 | 1.627246  | 2.402161  |
| 6  | 2.594548  | 3.274567  | 2.966934  |
| 8  | 3.583864  | 1.321955  | 1.941929  |
| 6  | 1.428844  | 3.939553  | 3.360988  |
| 1  | -0.719569 | 3.851324  | 3.486307  |
| 1  | 3.580690  | 3.700323  | 3.119196  |
| 6  | 3.355151  | -0.011838 | 1.952236  |
| 1  | 1.501363  | 4.915215  | 3.832710  |
| 1  | 3.178619  | -0.478366 | 2.919833  |
| 1  | 4.021572  | -0.550450 | 1.279643  |
| 1  | 2.260008  | -0.242772 | 1.004828  |
| 6  | 0.958062  | -3.314776 | 3.038716  |
| 1  | -0.120659 | -3.365401 | 2.877844  |
| 1  | 1.438354  | -4.158357 | 2.537842  |
| 6  | 1.299624  | -3.272110 | 4.520716  |
| 1  | 0.802966  | -2.427316 | 5.006133  |
| 1  | 0.961641  | -4.194742 | 5.006928  |
| 1  | 2.381341  | -3.184867 | 4.671695  |
| 26 | 0.728487  | -0.106354 | -0.487098 |

---

<sup>10</sup>SS<sup>TS(C-D)</sup><sub>Fe</sub>

-----

|                                              |                             |                  |
|----------------------------------------------|-----------------------------|------------------|
| Number of imaginary frequencies: 1           | Electronic energy:          | HF=-2610.2859227 |
| Zero-point correction=                       | 0.804937 (Hartree/Particle) |                  |
| Thermal correction to Energy=                | 0.858994                    |                  |
| Thermal correction to Enthalpy=              | 0.859938                    |                  |
| Thermal correction to Gibbs Free Energy=     | 0.715324                    |                  |
| Sum of electronic and zero-point Energies=   | -2609.480985                |                  |
| Sum of electronic and thermal Energies=      | -2609.426928                |                  |
| Sum of electronic and thermal Enthalpies=    | -2609.425984                |                  |
| Sum of electronic and thermal Free Energies= | -2609.570599                |                  |

.....

Cartesian Coordinates

.....

|   |           |           |           |
|---|-----------|-----------|-----------|
| 6 | 3.534460  | -3.257397 | -1.395760 |
| 6 | 2.240246  | -2.732047 | -1.028691 |
| 7 | 2.240864  | -1.351677 | -1.026565 |
| 6 | 3.517459  | -0.992229 | -1.391833 |
| 6 | 4.342197  | -2.166444 | -1.631378 |
| 6 | 1.141352  | -3.523821 | -0.733978 |
| 6 | -0.116489 | -3.055411 | -0.395168 |
| 7 | -0.466779 | -1.728151 | -0.299550 |
| 6 | -1.797021 | -1.729672 | 0.048835  |
| 6 | -2.292769 | -3.086308 | 0.206751  |
| 6 | -1.241411 | -3.914344 | -0.087781 |
| 6 | -2.579316 | -0.591085 | 0.156221  |
| 6 | -2.158187 | 0.699485  | -0.130708 |
| 7 | -0.865525 | 1.059745  | -0.442674 |
| 6 | -0.902067 | 2.424333  | -0.628691 |
| 6 | -2.245882 | 2.933301  | -0.472179 |
| 6 | -3.032600 | 1.856643  | -0.156677 |
| 6 | 0.193687  | 3.231293  | -0.891361 |
| 6 | 1.494653  | 2.786175  | -1.051009 |
| 7 | 1.863808  | 1.462831  | -1.038926 |
| 6 | 3.191526  | 1.451645  | -1.397361 |
| 6 | 3.683450  | 2.792968  | -1.620595 |
| 6 | 2.630381  | 3.639937  | -1.373629 |
| 6 | 3.961932  | 0.310440  | -1.558583 |
| 1 | 0.016874  | 4.293686  | -1.001298 |
| 1 | 4.987895  | 0.451180  | -1.878470 |
| 1 | 1.272706  | -4.598592 | -0.786049 |
| 1 | -3.616093 | -0.724813 | 0.439322  |
| 6 | -4.522923 | 1.845327  | 0.032636  |
| 1 | -4.827085 | 1.041359  | 0.710385  |
| 1 | -4.840105 | 2.782280  | 0.506167  |
| 6 | -5.274319 | 1.689784  | -1.320559 |
| 1 | -5.032229 | 0.719155  | -1.769286 |
| 1 | -4.970584 | 2.479106  | -2.011443 |
| 6 | -6.769912 | 1.788227  | -1.161915 |
| 8 | -7.495979 | 2.661426  | -1.570313 |
| 8 | -7.278161 | 0.731945  | -0.438721 |



|   |           |           |           |
|---|-----------|-----------|-----------|
| 1 | -8.242492 | 0.872959  | -0.381353 |
| 6 | -3.681342 | -3.500294 | 0.610716  |
| 1 | -4.083261 | -2.826915 | 1.375066  |
| 1 | -3.619728 | -4.485989 | 1.084290  |
| 6 | -4.709906 | -3.609512 | -0.553029 |
| 1 | -4.245624 | -4.034550 | -1.445436 |
| 1 | -5.522411 | -4.273351 | -0.232642 |
| 6 | -5.342942 | -2.288442 | -0.934590 |
| 8 | -5.250973 | -1.741636 | -2.015195 |
| 8 | -6.047109 | -1.770570 | 0.097435  |
| 1 | -6.459604 | -0.926421 | -0.195372 |
| 6 | -1.204613 | -5.413754 | -0.116467 |
| 1 | -2.135636 | -5.845606 | 0.262438  |
| 1 | -1.059963 | -5.796234 | -1.135538 |
| 1 | -0.385561 | -5.812664 | 0.495096  |
| 6 | -2.646434 | 4.368884  | -0.638362 |
| 1 | -2.489439 | 4.718660  | -1.666841 |
| 1 | -3.703381 | 4.520077  | -0.399553 |
| 1 | -2.063194 | 5.027349  | 0.017470  |
| 6 | 3.895278  | -4.710498 | -1.457725 |
| 1 | 3.350541  | -5.294801 | -0.708433 |
| 1 | 3.671436  | -5.151784 | -2.438960 |
| 1 | 4.966111  | -4.849075 | -1.277441 |
| 6 | 5.090411  | 3.144487  | -1.998378 |
| 1 | 5.799423  | 2.869812  | -1.206305 |
| 1 | 5.407881  | 2.626078  | -2.911953 |
| 1 | 5.198865  | 4.218930  | -2.170781 |
| 6 | 5.750690  | -2.119448 | -2.013058 |
| 6 | 6.414791  | -3.023893 | -2.749664 |
| 1 | 6.309796  | -1.254184 | -1.657142 |
| 1 | 7.473349  | -2.901137 | -2.959964 |
| 1 | 5.930966  | -3.892535 | -3.184945 |
| 6 | 2.654312  | 5.101654  | -1.432881 |
| 6 | 2.017965  | 5.944262  | -0.605517 |
| 1 | 3.285203  | 5.530799  | -2.211954 |
| 1 | 2.106606  | 7.019985  | -0.729078 |
| 1 | 1.423448  | 5.593633  | 0.233156  |
| 6 | 1.197145  | 0.051515  | 1.428576  |
| 6 | 1.119270  | 1.391601  | 2.089314  |
| 6 | 0.662233  | -1.069762 | 2.269433  |
| 6 | -0.080963 | 1.955490  | 2.556685  |
| 6 | 2.296864  | 2.146665  | 2.286580  |
| 8 | -0.375261 | -1.039943 | 2.905814  |
| 8 | 1.499305  | -2.139108 | 2.268491  |
| 6 | -0.110796 | 3.210995  | 3.161017  |
| 1 | -0.993327 | 1.383299  | 2.444287  |
| 6 | 2.277307  | 3.410269  | 2.875918  |
| 8 | 3.528384  | 1.675816  | 1.867049  |
| 6 | 1.067609  | 3.947592  | 3.310685  |
| 1 | -1.055690 | 3.612855  | 3.516375  |

|    |           |           |           |
|----|-----------|-----------|-----------|
| 1  | 3.215363  | 3.943297  | 2.995024  |
| 6  | 3.688529  | 0.307351  | 1.938489  |
| 1  | 1.050092  | 4.927789  | 3.779703  |
| 1  | 3.647726  | -0.111975 | 2.947755  |
| 1  | 4.503126  | -0.029031 | 1.303919  |
| 1  | 2.440617  | -0.143279 | 1.374279  |
| 6  | 1.076208  | -3.288948 | 3.033816  |
| 1  | -0.005017 | -3.404684 | 2.928302  |
| 1  | 1.579473  | -4.132429 | 2.554121  |
| 6  | 1.476627  | -3.161923 | 4.497100  |
| 1  | 0.955579  | -2.322035 | 4.964924  |
| 1  | 1.211238  | -4.077478 | 5.039064  |
| 1  | 2.556935  | -3.008056 | 4.593675  |
| 26 | 0.750030  | -0.116457 | -0.458405 |

---

**<sup>3</sup>TS(C-D)<sub>Fe</sub>**

---

Number of imaginary frequencies: 1    Electronic energy:    HF=-2610.2645737  
Zero-point correction=                    0.805572 (Hartree/Particle)  
Thermal correction to Energy=            0.860170  
Thermal correction to Enthalpy=         0.861114  
Thermal correction to Gibbs Free Energy=    0.712814  
Sum of electronic and zero-point Energies=    -2609.459001  
Sum of electronic and thermal Energies=    -2609.404404  
Sum of electronic and thermal Enthalpies=    -2609.403460  
Sum of electronic and thermal Free Energies=   -2609.551760

.....  
Cartesian Coordinates

.....

|   |           |           |           |
|---|-----------|-----------|-----------|
| 6 | 3.376195  | -3.358799 | -1.514735 |
| 6 | 2.112888  | -2.789519 | -1.096903 |
| 7 | 2.158203  | -1.414591 | -1.132474 |
| 6 | 3.416772  | -1.091610 | -1.572168 |
| 6 | 4.197558  | -2.296505 | -1.825508 |
| 6 | 1.000262  | -3.535652 | -0.729511 |
| 6 | -0.244460 | -3.028025 | -0.386228 |
| 7 | -0.575874 | -1.695342 | -0.327007 |
| 6 | -1.906468 | -1.651583 | 0.010956  |
| 6 | -2.431213 | -2.995886 | 0.192335  |
| 6 | -1.392582 | -3.853104 | -0.061906 |
| 6 | -2.658303 | -0.489792 | 0.121235  |
| 6 | -2.196135 | 0.797679  | -0.115402 |
| 7 | -0.892737 | 1.126690  | -0.396646 |
| 6 | -0.869588 | 2.491626  | -0.547852 |
| 6 | -2.197613 | 3.046816  | -0.371481 |
| 6 | -3.026681 | 1.990645  | -0.102217 |
| 6 | 0.257549  | 3.253040  | -0.822301 |
| 6 | 1.532322  | 2.758145  | -1.057477 |
| 7 | 1.854544  | 1.425667  | -1.108245 |
| 6 | 3.159315  | 1.367337  | -1.538120 |

|   |           |           |           |
|---|-----------|-----------|-----------|
| 6 | 3.689739  | 2.696846  | -1.747702 |
| 6 | 2.686654  | 3.575504  | -1.415920 |
| 6 | 3.883735  | 0.202722  | -1.756492 |
| 1 | 0.126271  | 4.324873  | -0.899840 |
| 1 | 4.896024  | 0.320183  | -2.125258 |
| 1 | 1.100295  | -4.614912 | -0.749354 |
| 1 | -3.700762 | -0.599773 | 0.392987  |
| 6 | -4.517840 | 2.022070  | 0.075599  |
| 1 | -4.849580 | 1.222817  | 0.746504  |
| 1 | -4.812564 | 2.965149  | 0.551440  |
| 6 | -5.264090 | 1.894724  | -1.283783 |
| 1 | -5.043022 | 0.922069  | -1.738728 |
| 1 | -4.935371 | 2.681463  | -1.966162 |
| 6 | -6.757433 | 2.030352  | -1.133179 |
| 8 | -7.456684 | 2.932461  | -1.525654 |
| 8 | -7.300050 | 0.973083  | -0.436590 |
| 1 | -8.260224 | 1.140832  | -0.382075 |
| 6 | -3.835606 | -3.369536 | 0.581535  |
| 1 | -4.224922 | -2.687579 | 1.344980  |
| 1 | -3.809246 | -4.359023 | 1.050417  |
| 6 | -4.856376 | -3.440988 | -0.592220 |
| 1 | -4.394764 | -3.866636 | -1.485702 |
| 1 | -5.686680 | -4.089967 | -0.286738 |
| 6 | -5.458974 | -2.102912 | -0.965037 |
| 8 | -5.363664 | -1.555843 | -2.044959 |
| 8 | -6.142897 | -1.570806 | 0.073837  |
| 1 | -6.532701 | -0.714038 | -0.213337 |
| 6 | -1.386397 | -5.353369 | -0.048570 |
| 1 | -2.325243 | -5.755901 | 0.343323  |
| 1 | -1.251464 | -5.767200 | -1.056727 |
| 1 | -0.574176 | -5.752220 | 0.572204  |
| 6 | -2.542136 | 4.501369  | -0.492176 |
| 1 | -2.408827 | 4.867230  | -1.518640 |
| 1 | -3.582311 | 4.691246  | -0.210384 |
| 1 | -1.907610 | 5.121564  | 0.153185  |
| 6 | 3.695589  | -4.822325 | -1.552955 |
| 1 | 3.161544  | -5.373359 | -0.771290 |
| 1 | 3.425398  | -5.280734 | -2.514524 |
| 1 | 4.768179  | -4.987159 | -1.406956 |
| 6 | 5.087045  | 3.006164  | -2.193762 |
| 1 | 5.829639  | 2.666880  | -1.459538 |
| 1 | 5.327048  | 2.516593  | -3.146185 |
| 1 | 5.232536  | 4.081826  | -2.327218 |
| 6 | 5.583334  | -2.295350 | -2.283668 |
| 6 | 6.195353  | -3.245606 | -3.008195 |
| 1 | 6.173210  | -1.422822 | -2.002886 |
| 1 | 7.242727  | -3.149466 | -3.279556 |
| 1 | 5.678244  | -4.126677 | -3.374532 |
| 6 | 2.770134  | 5.035817  | -1.428853 |
| 6 | 2.209398  | 5.876967  | -0.546828 |

|    |           |           |           |
|----|-----------|-----------|-----------|
| 1  | 3.382327  | 5.464474  | -2.223030 |
| 1  | 2.338193  | 6.951585  | -0.641777 |
| 1  | 1.638678  | 5.524094  | 0.307214  |
| 6  | 1.269706  | -0.005021 | 1.602898  |
| 6  | 1.518082  | 1.308196  | 2.230496  |
| 6  | 0.615399  | -1.011554 | 2.460892  |
| 6  | 0.473189  | 2.138461  | 2.667750  |
| 6  | 2.834036  | 1.798899  | 2.360883  |
| 8  | -0.512800 | -0.818928 | 2.884349  |
| 8  | 1.316973  | -2.152645 | 2.638289  |
| 6  | 0.741143  | 3.400279  | 3.205311  |
| 1  | -0.545291 | 1.780765  | 2.579756  |
| 6  | 3.109171  | 3.048574  | 2.896546  |
| 8  | 3.887440  | 1.019674  | 1.907566  |
| 6  | 2.052173  | 3.861479  | 3.316647  |
| 1  | -0.086225 | 4.016642  | 3.545919  |
| 1  | 4.143367  | 3.365632  | 2.984025  |
| 6  | 3.621439  | -0.336335 | 1.929143  |
| 1  | 2.260638  | 4.839265  | 3.741048  |
| 1  | 3.558351  | -0.773389 | 2.930379  |
| 1  | 4.301994  | -0.865067 | 1.260193  |
| 1  | 2.559539  | -0.509147 | 1.377636  |
| 6  | 0.638375  | -3.221640 | 3.344501  |
| 1  | -0.411519 | -3.225242 | 3.043793  |
| 1  | 1.122201  | -4.130332 | 2.978186  |
| 6  | 0.787880  | -3.075614 | 4.851435  |
| 1  | 0.289483  | -2.167250 | 5.201206  |
| 1  | 0.330997  | -3.935136 | 5.355845  |
| 1  | 1.844415  | -3.033250 | 5.137411  |
| 26 | 0.674634  | -0.130375 | -0.576284 |

**Optimised geometries where cyclohexene is used as a substrate for intermolecular C-H insertion**

-----  
**1C5SS<sup>+</sup>TS(C-D)<sub>Fe(his)</sub>**  
 -----

Number of imaginary frequencies: 1    Electronic energy:    HF=-2110.173879  
 Zero-point correction=                    0.670953 (Hartree/Particle)  
 Thermal correction to Energy=            0.711705  
 Thermal correction to Enthalpy=         0.712649  
 Thermal correction to Gibbs Free Energy= 0.598901  
 Sum of electronic and zero-point Energies= -2109.502926  
 Sum of electronic and thermal Energies= -2109.462174  
 Sum of electronic and thermal Enthalpies= -2109.461230  
 Sum of electronic and thermal Free Energies= -2109.574978

-----  
 Cartesian Coordinates  
 -----

|    |          |           |           |
|----|----------|-----------|-----------|
| 26 | 0.935767 | -0.190751 | 0.176390  |
| 7  | 1.600767 | -0.339301 | -1.732500 |

|   |           |           |           |
|---|-----------|-----------|-----------|
| 6 | 2.231993  | 0.637117  | -2.454719 |
| 6 | 1.532816  | -1.435266 | -2.550750 |
| 6 | 2.562676  | 0.148775  | -3.778163 |
| 6 | 2.116341  | -1.133836 | -3.843216 |
| 1 | 3.060343  | 0.729198  | -4.545352 |
| 1 | 2.178796  | -1.829020 | -4.671568 |
| 7 | 0.577772  | -2.189954 | 0.181832  |
| 6 | 0.250082  | -2.959266 | 1.267260  |
| 6 | 0.670814  | -3.050280 | -0.879847 |
| 6 | 0.120710  | -4.348433 | 0.878269  |
| 6 | 0.370727  | -4.403192 | -0.458768 |
| 1 | -0.132744 | -5.159649 | 1.550149  |
| 1 | 0.368528  | -5.268696 | -1.110135 |
| 7 | 0.415879  | -0.083483 | 2.126426  |
| 6 | 0.409707  | 1.035466  | 2.922316  |
| 6 | 0.110214  | -1.139472 | 2.949436  |
| 6 | 0.051733  | 0.682339  | 4.279233  |
| 6 | -0.123454 | -0.670134 | 4.297940  |
| 1 | -0.027580 | 1.382543  | 5.102127  |
| 1 | -0.379607 | -1.303304 | 5.138919  |
| 7 | 1.471066  | 1.761217  | 0.223120  |
| 6 | 1.311299  | 2.639676  | 1.261473  |
| 6 | 2.140464  | 2.445063  | -0.757742 |
| 6 | 1.872908  | 3.930455  | 0.918545  |
| 6 | 2.399786  | 3.805259  | -0.331407 |
| 1 | 1.882405  | 4.796162  | 1.569991  |
| 1 | 2.920960  | 4.550585  | -0.920137 |
| 6 | -1.077942 | 0.281380  | -0.682973 |
| 6 | 2.507420  | 1.922616  | -1.996930 |
| 6 | 0.779066  | 2.316206  | 2.509315  |
| 6 | 1.071763  | -2.693164 | -2.166832 |
| 6 | 0.036069  | -2.474883 | 2.555713  |
| 1 | 0.728933  | 3.110074  | 3.249957  |
| 1 | 3.027724  | 2.589185  | -2.679512 |
| 1 | 1.088104  | -3.478481 | -2.917646 |
| 1 | -0.217644 | -3.201893 | 3.322825  |
| 1 | -1.649371 | 0.718413  | 0.382965  |
| 6 | -1.941809 | -0.824730 | -1.166059 |
| 6 | -2.389948 | -0.957577 | -2.501587 |
| 6 | -2.372195 | -1.803533 | -0.239636 |
| 6 | -3.216588 | -2.013548 | -2.880371 |
| 1 | -2.062040 | -0.240158 | -3.242012 |
| 6 | -3.216569 | -2.842807 | -0.617542 |
| 1 | -2.037901 | -1.737005 | 0.786486  |
| 6 | -3.643668 | -2.957181 | -1.943179 |
| 1 | -3.533351 | -2.095289 | -3.917410 |
| 1 | -3.528699 | -3.574946 | 0.122880  |
| 1 | -4.293671 | -3.775412 | -2.243205 |
| 6 | -0.960111 | 1.447554  | -1.609421 |
| 8 | -1.140120 | 2.657178  | -1.013739 |

|   |           |           |           |
|---|-----------|-----------|-----------|
| 8 | -0.686505 | 1.361697  | -2.795606 |
| 6 | -0.987675 | 3.806229  | -1.874424 |
| 1 | 0.042627  | 3.836449  | -2.238502 |
| 1 | -1.646046 | 3.691638  | -2.742018 |
| 6 | -1.330356 | 5.039633  | -1.058361 |
| 1 | -1.226281 | 5.935820  | -1.680795 |
| 1 | -2.361269 | 4.997876  | -0.689946 |
| 1 | -0.655493 | 5.133029  | -0.202332 |
| 6 | -2.643940 | 1.385390  | 1.098932  |
| 6 | -3.804015 | 1.872933  | 0.248912  |
| 6 | -2.989296 | 0.455671  | 2.165676  |
| 6 | -4.883840 | 0.805639  | 0.016595  |
| 1 | -3.444522 | 2.280775  | -0.697128 |
| 1 | -4.242533 | 2.725806  | 0.794570  |
| 6 | -4.221674 | -0.089321 | 2.280417  |
| 1 | -2.230624 | 0.225876  | 2.905456  |
| 6 | -5.356862 | 0.182755  | 1.336885  |
| 1 | -5.732676 | 1.250310  | -0.516159 |
| 1 | -4.482057 | 0.017950  | -0.626582 |
| 1 | -4.431258 | -0.728255 | 3.137683  |
| 1 | -6.073477 | 0.850260  | 1.845546  |
| 1 | -5.911470 | -0.745892 | 1.146001  |
| 1 | -1.925816 | 2.158808  | 1.371576  |
| 7 | 2.871393  | -0.642115 | 0.786173  |
| 6 | 3.610017  | -0.031240 | 1.778911  |
| 6 | 3.639408  | -1.586576 | 0.275235  |
| 6 | 4.842589  | -0.620133 | 1.865222  |
| 1 | 3.202640  | 0.784092  | 2.355017  |
| 1 | 3.363491  | -2.253843 | -0.526059 |
| 1 | 5.692327  | -0.433802 | 2.503211  |
| 1 | 5.604597  | -2.239868 | 0.689201  |
| 7 | 4.845371  | -1.609836 | 0.899868  |

-----  
<sup>10SS</sup>TS(C-D) Fe(his)  
 -----

Number of imaginary frequencies: 1    Electronic energy:    HF=-2110.1737557  
 Zero-point correction=                    0.670112 (Hartree/Particle)  
 Thermal correction to Energy=            0.711145  
 Thermal correction to Enthalpy=         0.712089  
 Thermal correction to Gibbs Free Energy= 0.596093  
 Sum of electronic and zero-point Energies= -2109.503644  
 Sum of electronic and thermal Energies= -2109.462610  
 Sum of electronic and thermal Enthalpies= -2109.461666  
 Sum of electronic and thermal Free Energies= -2109.577663

.....  
 Cartesian Coordinates  
 .....

|    |          |           |           |
|----|----------|-----------|-----------|
| 26 | 0.844535 | -0.144978 | 0.208331  |
| 7  | 1.229724 | -1.695893 | -1.034939 |
| 6  | 1.747981 | -1.628482 | -2.303602 |

|   |           |           |           |
|---|-----------|-----------|-----------|
| 6 | 0.972391  | -3.021631 | -0.798890 |
| 6 | 1.798137  | -2.947731 | -2.892498 |
| 6 | 1.324087  | -3.813054 | -1.954955 |
| 1 | 2.161204  | -3.164818 | -3.889433 |
| 1 | 1.212733  | -4.887918 | -2.023623 |
| 7 | 0.149366  | -1.432039 | 1.595138  |
| 6 | -0.319885 | -1.119877 | 2.844619  |
| 6 | 0.088162  | -2.799549 | 1.496394  |
| 6 | -0.714987 | -2.321017 | 3.545769  |
| 6 | -0.454025 | -3.364079 | 2.710234  |
| 1 | -1.122457 | -2.345639 | 4.548938  |
| 1 | -0.608098 | -4.421820 | 2.883805  |
| 7 | 0.707585  | 1.362716  | 1.531526  |
| 6 | 1.183760  | 2.643287  | 1.388266  |
| 6 | 0.131723  | 1.309857  | 2.777443  |
| 6 | 0.859989  | 3.429452  | 2.555352  |
| 6 | 0.199766  | 2.604707  | 3.415013  |
| 1 | 1.121275  | 4.471910  | 2.689228  |
| 1 | -0.191153 | 2.829950  | 4.399573  |
| 7 | 1.855574  | 1.088840  | -1.067417 |
| 6 | 2.228957  | 2.387495  | -0.834337 |
| 6 | 2.345450  | 0.769367  | -2.307971 |
| 6 | 2.972072  | 2.904770  | -1.961053 |
| 6 | 3.033971  | 1.902568  | -2.881816 |
| 1 | 3.382410  | 3.905162  | -2.024438 |
| 1 | 3.503980  | 1.910550  | -3.857394 |
| 6 | -0.936593 | 0.151332  | -0.703980 |
| 6 | 2.254025  | -0.481734 | -2.908790 |
| 6 | 1.915274  | 3.118055  | 0.306046  |
| 6 | 0.464473  | -3.543622 | 0.385323  |
| 6 | -0.358004 | 0.160267  | 3.390447  |
| 1 | 2.262267  | 4.146429  | 0.352370  |
| 1 | 2.658364  | -0.584780 | -3.911390 |
| 1 | 0.331707  | -4.620055 | 0.438258  |
| 1 | -0.755823 | 0.262824  | 4.396186  |
| 1 | -1.805488 | 0.733825  | 0.202908  |
| 6 | -1.710584 | -1.062725 | -1.136843 |
| 6 | -1.781657 | -1.514967 | -2.473003 |
| 6 | -2.430549 | -1.800244 | -0.174545 |
| 6 | -2.532456 | -2.639794 | -2.815697 |
| 1 | -1.244800 | -0.974665 | -3.239720 |
| 6 | -3.189287 | -2.917091 | -0.521241 |
| 1 | -2.410076 | -1.482211 | 0.859669  |
| 6 | -3.245455 | -3.348299 | -1.847522 |
| 1 | -2.560249 | -2.960103 | -3.854857 |
| 1 | -3.737405 | -3.449981 | 0.252454  |
| 1 | -3.834599 | -4.220187 | -2.121541 |
| 6 | -0.826596 | 1.240082  | -1.733631 |
| 8 | -0.878647 | 2.485650  | -1.187542 |
| 8 | -0.704784 | 1.091150  | -2.938972 |

|   |           |           |           |
|---|-----------|-----------|-----------|
| 6 | -0.797904 | 3.581305  | -2.120200 |
| 1 | 0.191978  | 3.577901  | -2.586770 |
| 1 | -1.537738 | 3.431362  | -2.913241 |
| 6 | -1.053716 | 4.863461  | -1.347222 |
| 1 | -0.986978 | 5.724883  | -2.021807 |
| 1 | -2.051612 | 4.857613  | -0.895957 |
| 1 | -0.317244 | 4.989766  | -0.547692 |
| 6 | -2.835551 | 1.493208  | 0.763752  |
| 6 | -3.832376 | 1.886378  | -0.320874 |
| 6 | -3.422646 | 0.781102  | 1.896635  |
| 6 | -4.916607 | 0.821769  | -0.547364 |
| 1 | -3.320366 | 2.108503  | -1.260853 |
| 1 | -4.309725 | 2.829987  | -0.007163 |
| 6 | -4.693690 | 0.319115  | 1.912634  |
| 1 | -2.799694 | 0.641473  | 2.775174  |
| 6 | -5.646255 | 0.469713  | 0.757666  |
| 1 | -5.634544 | 1.173397  | -1.298545 |
| 1 | -4.450030 | -0.083028 | -0.949898 |
| 1 | -5.072482 | -0.160868 | 2.814441  |
| 1 | -6.386485 | 1.249691  | 1.005564  |
| 1 | -6.229065 | -0.453213 | 0.629602  |
| 1 | -2.152900 | 2.295855  | 1.047018  |
| 7 | 2.858084  | -0.557910 | 1.078281  |
| 6 | 3.222315  | -0.529132 | 2.408063  |
| 6 | 3.942016  | -0.886922 | 0.402615  |
| 6 | 4.548510  | -0.846330 | 2.532494  |
| 1 | 2.506551  | -0.284308 | 3.177081  |
| 1 | 4.004533  | -0.997142 | -0.669071 |
| 1 | 5.198097  | -0.930860 | 3.389785  |
| 1 | 5.930378  | -1.328749 | 0.969527  |
| 7 | 4.993616  | -1.071683 | 1.243260  |

---

**<sup>3</sup>TS(C-D) Fe(his)**

---

Number of imaginary frequencies: 1    Electronic energy:    HF=-2110.173677  
Zero-point correction=                    0.668646 (Hartree/Particle)  
Thermal correction to Energy=            0.711449  
Thermal correction to Enthalpy=         0.712393  
Thermal correction to Gibbs Free Energy= 0.584425  
Sum of electronic and zero-point Energies= -2109.505030  
Sum of electronic and thermal Energies= -2109.462228  
Sum of electronic and thermal Enthalpies= -2109.461284  
Sum of electronic and thermal Free Energies= -2109.589252

.....  
Cartesian Coordinates

.....

|    |          |           |           |
|----|----------|-----------|-----------|
| 26 | 1.362397 | -0.149713 | 0.079491  |
| 7  | 1.698138 | 0.545207  | -1.783198 |
| 6  | 1.925088 | 1.844422  | -2.162779 |
| 6  | 1.774861 | -0.201025 | -2.930869 |



|   |           |           |           |
|---|-----------|-----------|-----------|
| 6 | 2.159586  | 1.919833  | -3.587549 |
| 6 | 2.063888  | 0.650120  | -4.064495 |
| 1 | 2.354739  | 2.833586  | -4.134743 |
| 1 | 2.167330  | 0.304344  | -5.085556 |
| 7 | 1.168954  | -2.031329 | -0.635387 |
| 6 | 0.901612  | -3.176369 | 0.076515  |
| 6 | 1.319713  | -2.424464 | -1.940632 |
| 6 | 0.884988  | -4.322196 | -0.803821 |
| 6 | 1.143168  | -3.854092 | -2.056594 |
| 1 | 0.694888  | -5.341532 | -0.490677 |
| 1 | 1.207647  | -4.411222 | -2.983172 |
| 7 | 0.903004  | -0.832793 | 1.929863  |
| 6 | 0.815751  | -0.083422 | 3.077168  |
| 6 | 0.678325  | -2.135169 | 2.309069  |
| 6 | 0.528003  | -0.934079 | 4.208699  |
| 6 | 0.443259  | -2.209154 | 3.732313  |
| 1 | 0.407483  | -0.587966 | 5.228030  |
| 1 | 0.239646  | -3.120881 | 4.280556  |
| 7 | 1.422443  | 1.745305  | 0.778061  |
| 6 | 1.250091  | 2.142728  | 2.080470  |
| 6 | 1.687308  | 2.887898  | 0.064919  |
| 6 | 1.407454  | 3.575480  | 2.191314  |
| 6 | 1.681801  | 4.038808  | 0.939750  |
| 1 | 1.321795  | 4.137560  | 3.113308  |
| 1 | 1.867488  | 5.057982  | 0.623728  |
| 6 | -1.854482 | 0.348051  | -0.757934 |
| 6 | 1.933464  | 2.938713  | -1.304577 |
| 6 | 0.973216  | 1.298343  | 3.151106  |
| 6 | 1.605013  | -1.578645 | -3.008860 |
| 6 | 0.679418  | -3.231296 | 1.449453  |
| 1 | 0.871087  | 1.756775  | 4.130819  |
| 1 | 2.135169  | 3.913273  | -1.740247 |
| 1 | 1.693375  | -2.034028 | -3.991104 |
| 1 | 0.484056  | -4.207253 | 1.885374  |
| 1 | -2.321208 | 0.509273  | 0.660309  |
| 6 | -2.639166 | -0.724845 | -1.322902 |
| 6 | -3.470831 | -0.577239 | -2.465423 |
| 6 | -2.558175 | -2.007237 | -0.722923 |
| 6 | -4.173344 | -1.659473 | -2.978450 |
| 1 | -3.518316 | 0.388239  | -2.957382 |
| 6 | -3.291983 | -3.079658 | -1.220782 |
| 1 | -1.901402 | -2.135995 | 0.129605  |
| 6 | -4.096930 | -2.910251 | -2.350653 |
| 1 | -4.791827 | -1.534201 | -3.863520 |
| 1 | -3.219617 | -4.053586 | -0.744475 |
| 1 | -4.656483 | -3.752128 | -2.750824 |
| 6 | -1.846924 | 1.660210  | -1.369818 |
| 8 | -2.097071 | 2.705846  | -0.536694 |
| 8 | -1.499376 | 1.811567  | -2.539182 |
| 6 | -1.896255 | 4.015507  | -1.106134 |

|   |           |           |           |
|---|-----------|-----------|-----------|
| 1 | -0.877153 | 4.077608  | -1.498056 |
| 1 | -2.585816 | 4.152153  | -1.946951 |
| 6 | -2.137519 | 5.032028  | -0.004435 |
| 1 | -2.003963 | 6.046385  | -0.397937 |
| 1 | -3.155052 | 4.950145  | 0.392770  |
| 1 | -1.429450 | 4.882809  | 0.816899  |
| 6 | -2.936855 | 0.745996  | 1.673004  |
| 6 | -4.306256 | 1.366405  | 1.405583  |
| 6 | -2.981445 | -0.535699 | 2.414436  |
| 6 | -5.354372 | 0.308089  | 1.029492  |
| 1 | -4.222452 | 2.132523  | 0.629575  |
| 1 | -4.627472 | 1.883874  | 2.323181  |
| 6 | -4.119198 | -1.225930 | 2.611871  |
| 1 | -2.043032 | -0.918374 | 2.808142  |
| 6 | -5.467115 | -0.778259 | 2.110311  |
| 1 | -6.330386 | 0.782451  | 0.869082  |
| 1 | -5.070292 | -0.160124 | 0.080108  |
| 1 | -4.087052 | -2.146179 | 3.194681  |
| 1 | -6.057809 | -0.406661 | 2.964380  |
| 1 | -6.025726 | -1.642312 | 1.724730  |
| 1 | -2.229263 | 1.459626  | 2.108834  |
| 7 | 3.709969  | -0.459293 | 0.476160  |
| 6 | 4.757265  | 0.375766  | 0.151786  |
| 6 | 4.246905  | -1.509741 | 1.062055  |
| 6 | 5.943961  | -0.182273 | 0.549710  |
| 1 | 4.581577  | 1.318378  | -0.345515 |
| 1 | 3.702702  | -2.362096 | 1.442652  |
| 1 | 6.967902  | 0.151030  | 0.478156  |
| 1 | 6.238803  | -2.061260 | 1.532582  |
| 7 | 5.601439  | -1.389419 | 1.131148  |

---

**W-<sup>1</sup>CSST<sub>S</sub>(C-D) Fe<sub>(his)</sub>**

---

Number of imaginary frequencies: 1    Electronic energy:    HF=-2109.5647421  
Zero-point correction=                    0.681971 (Hartree/Particle)  
Thermal correction to Energy=            0.721340  
Thermal correction to Enthalpy=         0.722284  
Thermal correction to Gibbs Free Energy= 0.612859  
Sum of electronic and zero-point Energies= -2108.882771  
Sum of electronic and thermal Energies= -2108.843402  
Sum of electronic and thermal Enthalpies= -2108.842458  
Sum of electronic and thermal Free Energies= -2108.951883

.....  
Cartesian Coordinates

.....  
26      0.905774 -0.285140 0.160558  
7        1.495199 -0.405386 -1.758941  
6        2.207010 0.527441 -2.447612  
6        1.248087 -1.419647 -2.633228

|   |           |           |           |
|---|-----------|-----------|-----------|
| 6 | 2.416272  | 0.093260  | -3.811936 |
| 6 | 1.805915  | -1.109028 | -3.932400 |
| 1 | 2.948411  | 0.657900  | -4.566826 |
| 1 | 1.738059  | -1.747229 | -4.804279 |
| 7 | 0.334177  | -2.219853 | 0.080297  |
| 6 | -0.049122 | -2.998374 | 1.130680  |
| 6 | 0.261641  | -3.010221 | -1.024819 |
| 6 | -0.378963 | -4.330279 | 0.674743  |
| 6 | -0.201893 | -4.332560 | -0.669172 |
| 1 | -0.714335 | -5.139116 | 1.311747  |
| 1 | -0.356088 | -5.144269 | -1.368662 |
| 7 | 0.404846  | -0.206554 | 2.110561  |
| 6 | 0.502429  | 0.869162  | 2.944234  |
| 6 | 0.012143  | -1.257766 | 2.887286  |
| 6 | 0.120527  | 0.498575  | 4.286814  |
| 6 | -0.173779 | -0.827382 | 4.252952  |
| 1 | 0.106343  | 1.169896  | 5.136257  |
| 1 | -0.482486 | -1.468576 | 5.069087  |
| 7 | 1.631943  | 1.587488  | 0.286853  |
| 6 | 1.546952  | 2.436531  | 1.347783  |
| 6 | 2.348392  | 2.238740  | -0.669048 |
| 6 | 2.218312  | 3.682261  | 1.048584  |
| 6 | 2.729085  | 3.553653  | -0.201094 |
| 1 | 2.299527  | 4.522901  | 1.726567  |
| 1 | 3.308255  | 4.270845  | -0.769256 |
| 6 | -1.037948 | 0.427841  | -0.626265 |
| 6 | 2.635807  | 1.744207  | -1.936373 |
| 6 | 0.984697  | 2.122963  | 2.579189  |
| 6 | 0.643486  | -2.626072 | -2.305496 |
| 6 | -0.187028 | -2.559790 | 2.440512  |
| 1 | 1.003805  | 2.891507  | 3.347132  |
| 1 | 3.205085  | 2.388033  | -2.601187 |
| 1 | 0.515301  | -3.352585 | -3.102739 |
| 1 | -0.504911 | -3.291605 | 3.178240  |
| 1 | -1.399578 | 0.864211  | 0.471810  |
| 6 | -2.007078 | -0.595734 | -1.063340 |
| 6 | -2.481070 | -0.715260 | -2.381655 |
| 6 | -2.490035 | -1.507884 | -0.107629 |
| 6 | -3.408402 | -1.696040 | -2.714289 |
| 1 | -2.100360 | -0.047718 | -3.143468 |
| 6 | -3.433180 | -2.469767 | -0.438381 |
| 1 | -2.111381 | -1.458127 | 0.903619  |
| 6 | -3.901156 | -2.568345 | -1.746389 |
| 1 | -3.752445 | -1.775228 | -3.741919 |
| 1 | -3.784230 | -3.158356 | 0.324926  |
| 1 | -4.630348 | -3.328296 | -2.013122 |
| 6 | -0.809533 | 1.578845  | -1.537080 |
| 8 | -0.744232 | 2.766259  | -0.901973 |
| 8 | -0.645479 | 1.489977  | -2.738148 |
| 6 | -0.475193 | 3.905091  | -1.721912 |

|   |           |           |           |
|---|-----------|-----------|-----------|
| 1 | 0.540919  | 3.820635  | -2.118012 |
| 1 | -1.168502 | 3.911444  | -2.569105 |
| 6 | -0.637331 | 5.128911  | -0.845304 |
| 1 | -0.435105 | 6.034754  | -1.426012 |
| 1 | -1.656910 | 5.192206  | -0.450426 |
| 1 | 0.063561  | 5.087513  | -0.006947 |
| 6 | -2.359324 | 1.632891  | 1.085001  |
| 6 | -3.462012 | 2.225511  | 0.233184  |
| 6 | -2.802201 | 0.735024  | 2.145366  |
| 6 | -4.613317 | 1.257700  | -0.053225 |
| 1 | -3.059901 | 2.640128  | -0.691670 |
| 1 | -3.839215 | 3.085417  | 0.809405  |
| 6 | -4.060393 | 0.265370  | 2.201685  |
| 1 | -2.085212 | 0.452969  | 2.907712  |
| 6 | -5.143502 | 0.604314  | 1.224357  |
| 1 | -5.420461 | 1.797582  | -0.559577 |
| 1 | -4.274516 | 0.480341  | -0.740499 |
| 1 | -4.338245 | -0.368824 | 3.041811  |
| 1 | -5.857463 | 1.269601  | 1.735000  |
| 1 | -5.706523 | -0.303895 | 0.976889  |
| 1 | -1.580687 | 2.342338  | 1.369140  |
| 7 | 2.749729  | -0.952146 | 0.716321  |
| 6 | 3.547327  | -0.481517 | 1.730411  |
| 6 | 3.408334  | -1.932047 | 0.140720  |
| 6 | 4.709729  | -1.195047 | 1.764265  |
| 1 | 3.224275  | 0.335403  | 2.357159  |
| 1 | 3.053349  | -2.514651 | -0.695893 |
| 1 | 5.577801  | -1.135668 | 2.400754  |
| 1 | 5.292672  | -2.804474 | 0.486784  |
| 7 | 4.605106  | -2.115901 | 0.744237  |

---

**W-<sup>10SS</sup>TS(C-D) Fe(his)**

---

Number of imaginary frequencies: 1    Electronic energy:    HF=-2109.5620107  
Zero-point correction=                    0.679451 (Hartree/Particle)  
Thermal correction to Energy=            0.719362  
Thermal correction to Enthalpy=         0.720306  
Thermal correction to Gibbs Free Energy= 0.608629  
Sum of electronic and zero-point Energies= -2108.882560  
Sum of electronic and thermal Energies= -2108.842648  
Sum of electronic and thermal Enthalpies= -2108.841704  
Sum of electronic and thermal Free Energies= -2108.953382

.....  
Cartesian Coordinates

.....

|    |          |           |           |
|----|----------|-----------|-----------|
| 26 | 0.817721 | -0.210980 | 0.232695  |
| 7  | 1.067981 | -1.804211 | -0.966440 |
| 6  | 1.572182 | -1.804143 | -2.234152 |
| 6  | 0.651159 | -3.080422 | -0.724609 |
| 6  | 1.458797 | -3.118375 | -2.816777 |

|   |           |           |           |
|---|-----------|-----------|-----------|
| 6 | 0.895019  | -3.912970 | -1.874985 |
| 1 | 1.779164  | -3.378818 | -3.817250 |
| 1 | 0.646991  | -4.964321 | -1.937926 |
| 7 | -0.049859 | -1.379254 | 1.605745  |
| 6 | -0.565621 | -0.982998 | 2.803223  |
| 6 | -0.262890 | -2.723542 | 1.527154  |
| 6 | -1.143065 | -2.107414 | 3.496781  |
| 6 | -0.946379 | -3.191384 | 2.705892  |
| 1 | -1.623887 | -2.055752 | 4.465142  |
| 1 | -1.237277 | -4.218507 | 2.883555  |
| 7 | 0.777957  | 1.327399  | 1.498982  |
| 6 | 1.374501  | 2.545032  | 1.343851  |
| 6 | 0.124076  | 1.375785  | 2.697105  |
| 6 | 1.051498  | 3.403642  | 2.454098  |
| 6 | 0.265804  | 2.680646  | 3.291202  |
| 1 | 1.395538  | 4.423888  | 2.565327  |
| 1 | -0.170320 | 2.980365  | 4.235384  |
| 7 | 1.964787  | 0.881415  | -1.036099 |
| 6 | 2.469677  | 2.128814  | -0.814460 |
| 6 | 2.415001  | 0.504495  | -2.266839 |
| 6 | 3.267427  | 2.553869  | -1.938454 |
| 6 | 3.218965  | 1.550156  | -2.849422 |
| 1 | 3.777411  | 3.506100  | -2.009186 |
| 1 | 3.682738  | 1.500970  | -3.826057 |
| 6 | -0.874959 | 0.220122  | -0.690403 |
| 6 | 2.190659  | -0.729638 | -2.855782 |
| 6 | 2.202708  | 2.911508  | 0.295258  |
| 6 | 0.063872  | -3.525846 | 0.446919  |
| 6 | -0.507689 | 0.305908  | 3.311160  |
| 1 | 2.647745  | 3.901481  | 0.331330  |
| 1 | 2.570188  | -0.883197 | -3.861018 |
| 1 | -0.205878 | -4.575551 | 0.503427  |
| 1 | -0.961785 | 0.483145  | 4.281672  |
| 1 | -1.669429 | 0.925680  | 0.184150  |
| 6 | -1.737832 | -0.941443 | -1.074087 |
| 6 | -1.756079 | -1.495580 | -2.364201 |
| 6 | -2.565336 | -1.530875 | -0.107145 |
| 6 | -2.561741 | -2.590039 | -2.661302 |
| 1 | -1.128480 | -1.063425 | -3.131897 |
| 6 | -3.380049 | -2.615482 | -0.407611 |
| 1 | -2.579828 | -1.126150 | 0.896835  |
| 6 | -3.381159 | -3.157227 | -1.689486 |
| 1 | -2.545400 | -3.001554 | -3.667106 |
| 1 | -4.010210 | -3.039104 | 0.370088  |
| 1 | -4.012335 | -4.008827 | -1.928791 |
| 6 | -0.655051 | 1.251724  | -1.746551 |
| 8 | -0.501243 | 2.481889  | -1.212675 |
| 8 | -0.613247 | 1.077197  | -2.949377 |
| 6 | -0.295792 | 3.548985  | -2.134359 |
| 1 | 0.684022  | 3.429418  | -2.608947 |

|   |           |           |           |
|---|-----------|-----------|-----------|
| 1 | -1.055132 | 3.499803  | -2.921556 |
| 6 | -0.390975 | 4.838569  | -1.344928 |
| 1 | -0.231038 | 5.698255  | -2.003906 |
| 1 | -1.379150 | 4.932670  | -0.883111 |
| 1 | 0.360437  | 4.858815  | -0.550263 |
| 6 | -2.596803 | 1.806475  | 0.695512  |
| 6 | -3.480572 | 2.287690  | -0.443515 |
| 6 | -3.340469 | 1.166006  | 1.779887  |
| 6 | -4.543260 | 1.253175  | -0.823435 |
| 1 | -2.882593 | 2.551067  | -1.318888 |
| 1 | -3.973947 | 3.216338  | -0.115308 |
| 6 | -4.608191 | 0.733778  | 1.649442  |
| 1 | -2.833908 | 1.037372  | 2.731162  |
| 6 | -5.404310 | 0.853918  | 0.380330  |
| 1 | -5.179840 | 1.647254  | -1.623642 |
| 1 | -4.045676 | 0.364187  | -1.221606 |
| 1 | -5.108905 | 0.288145  | 2.507436  |
| 1 | -6.204751 | 1.593584  | 0.539623  |
| 1 | -5.913884 | -0.096536 | 0.174567  |
| 1 | -1.856029 | 2.538032  | 1.024718  |
| 7 | 2.695802  | -0.775884 | 1.150391  |
| 6 | 3.000769  | -0.782855 | 2.488847  |
| 6 | 3.769626  | -1.185808 | 0.516002  |
| 6 | 4.286472  | -1.206164 | 2.661326  |
| 1 | 2.272011  | -0.483098 | 3.226487  |
| 1 | 3.859610  | -1.293179 | -0.554761 |
| 1 | 4.891099  | -1.347548 | 3.542668  |
| 1 | 5.683543  | -1.789592 | 1.155369  |
| 7 | 4.762535  | -1.459064 | 1.393092  |

---

**W-<sup>3</sup>TS(C-D) Fe(his)**

---

Number of imaginary frequencies: 1    Electronic energy:    HF=-2109.5539804  
Zero-point correction=                    0.679144 (Hartree/Particle)  
Thermal correction to Energy=            0.719294  
Thermal correction to Enthalpy=         0.720238  
Thermal correction to Gibbs Free Energy= 0.606672  
Sum of electronic and zero-point Energies= -2108.874836  
Sum of electronic and thermal Energies= -2108.834686  
Sum of electronic and thermal Enthalpies= -2108.833742  
Sum of electronic and thermal Free Energies= -2108.947308

---

Cartesian Coordinates

---

|    |          |           |           |
|----|----------|-----------|-----------|
| 26 | 0.871640 | -0.189552 | 0.243597  |
| 7  | 1.166850 | -1.782200 | -0.941947 |
| 6  | 1.681891 | -1.805538 | -2.204220 |
| 6  | 0.782859 | -3.062185 | -0.665276 |
| 6  | 1.610350 | -3.137638 | -2.750194 |
| 6  | 1.061502 | -3.920011 | -1.789604 |

|   |           |           |           |
|---|-----------|-----------|-----------|
| 1 | 1.945811  | -3.417179 | -3.740384 |
| 1 | 0.842286  | -4.979051 | -1.824628 |
| 7 | -0.002341 | -1.327678 | 1.633961  |
| 6 | -0.566808 | -0.926808 | 2.809374  |
| 6 | -0.177681 | -2.677444 | 1.568589  |
| 6 | -1.128660 | -2.054894 | 3.504014  |
| 6 | -0.877355 | -3.145406 | 2.736136  |
| 1 | -1.640504 | -2.002032 | 4.456091  |
| 1 | -1.145793 | -4.177247 | 2.921546  |
| 7 | 0.721473  | 1.378403  | 1.480180  |
| 6 | 1.276276  | 2.607510  | 1.293416  |
| 6 | 0.041224  | 1.445211  | 2.662571  |
| 6 | 0.906732  | 3.491790  | 2.370392  |
| 6 | 0.129116  | 2.772008  | 3.217005  |
| 1 | 1.213426  | 4.526659  | 2.451703  |
| 1 | -0.336373 | 3.087858  | 4.141539  |
| 7 | 1.966017  | 0.898875  | -1.051007 |
| 6 | 2.406274  | 2.175610  | -0.849251 |
| 6 | 2.436905  | 0.523707  | -2.276875 |
| 6 | 3.186336  | 2.616365  | -1.978916 |
| 6 | 3.189312  | 1.596860  | -2.873534 |
| 1 | 3.647912  | 3.591660  | -2.065973 |
| 1 | 3.656390  | 1.554781  | -3.848765 |
| 6 | -0.915675 | 0.196828  | -0.686253 |
| 6 | 2.269046  | -0.726498 | -2.846937 |
| 6 | 2.100804  | 2.972662  | 0.239572  |
| 6 | 0.192761  | -3.492289 | 0.509374  |
| 6 | -0.568237 | 0.373227  | 3.291077  |
| 1 | 2.506067  | 3.980057  | 0.249576  |
| 1 | 2.659978  | -0.883927 | -3.846896 |
| 1 | -0.050163 | -4.547166 | 0.586685  |
| 1 | -1.055299 | 0.556873  | 4.243972  |
| 1 | -1.798141 | 0.916792  | 0.179714  |
| 6 | -1.693823 | -1.018251 | -1.068479 |
| 6 | -1.658499 | -1.602791 | -2.345588 |
| 6 | -2.513878 | -1.624591 | -0.104010 |
| 6 | -2.401531 | -2.743260 | -2.631185 |
| 1 | -1.038316 | -1.156038 | -3.111234 |
| 6 | -3.267157 | -2.755426 | -0.394031 |
| 1 | -2.572617 | -1.192582 | 0.887564  |
| 6 | -3.211526 | -3.328012 | -1.661329 |
| 1 | -2.343890 | -3.177710 | -3.625866 |
| 1 | -3.894627 | -3.190186 | 0.379701  |
| 1 | -3.793952 | -4.216022 | -1.892059 |
| 6 | -0.696506 | 1.201680  | -1.764123 |
| 8 | -0.595783 | 2.447540  | -1.250270 |
| 8 | -0.622369 | 1.010289  | -2.963705 |
| 6 | -0.417634 | 3.504887  | -2.187397 |
| 1 | 0.567520  | 3.408157  | -2.656688 |
| 1 | -1.171250 | 3.420989  | -2.977248 |

|   |           |           |           |
|---|-----------|-----------|-----------|
| 6 | -0.555268 | 4.803533  | -1.419047 |
| 1 | -0.421944 | 5.657498  | -2.091347 |
| 1 | -1.546479 | 4.872331  | -0.959570 |
| 1 | 0.193733  | 4.860654  | -0.623685 |
| 6 | -2.720196 | 1.737744  | 0.672090  |
| 6 | -3.612658 | 2.188790  | -0.475788 |
| 6 | -3.467038 | 1.074635  | 1.749261  |
| 6 | -4.608542 | 1.097354  | -0.877861 |
| 1 | -3.012527 | 2.486642  | -1.339723 |
| 1 | -4.164730 | 3.086109  | -0.154624 |
| 6 | -4.708843 | 0.584124  | 1.595774  |
| 1 | -2.976630 | 0.972252  | 2.713342  |
| 6 | -5.479850 | 0.661137  | 0.306310  |
| 1 | -5.243814 | 1.449314  | -1.698847 |
| 1 | -4.052782 | 0.232785  | -1.253818 |
| 1 | -5.207707 | 0.116942  | 2.443555  |
| 1 | -6.319335 | 1.361646  | 0.439365  |
| 1 | -5.936859 | -0.313956 | 0.091347  |
| 1 | -2.037966 | 2.516259  | 1.023977  |
| 7 | 2.729219  | -0.663700 | 1.206699  |
| 6 | 3.023938  | -0.595468 | 2.545828  |
| 6 | 3.814470  | -1.086769 | 0.599450  |
| 6 | 4.315176  | -0.986202 | 2.746784  |
| 1 | 2.283926  | -0.270770 | 3.261302  |
| 1 | 3.912215  | -1.246796 | -0.464024 |
| 1 | 4.916832  | -1.071310 | 3.637308  |
| 1 | 5.733060  | -1.621423 | 1.280896  |
| 7 | 4.804423  | -1.295732 | 1.495228  |

-----

**<sup>1</sup>CSSTs(C-D)<sub>Fe</sub>**

-----

Number of imaginary frequencies: 1    Electronic energy:    HF=-1883.9429274  
Zero-point correction=                    0.598220 (Hartree/Particle)  
Thermal correction to Energy=            0.633954  
Thermal correction to Enthalpy=         0.634898  
Thermal correction to Gibbs Free Energy= 0.531627  
Sum of electronic and zero-point Energies= -1883.344707  
Sum of electronic and thermal Energies= -1883.308973  
Sum of electronic and thermal Enthalpies= -1883.308029  
Sum of electronic and thermal Free Energies= -1883.411301

-----

Cartesian Coordinates

-----

|    |           |          |           |
|----|-----------|----------|-----------|
| 26 | -0.521347 | 0.684655 | 0.925930  |
| 7  | -0.213311 | 2.566958 | 0.270496  |
| 6  | -1.068075 | 3.337023 | -0.483212 |
| 6  | 0.937289  | 3.311022 | 0.392596  |
| 6  | -0.428401 | 4.572542 | -0.874278 |
| 6  | 0.817387  | 4.556435 | -0.330429 |



|   |           |           |           |
|---|-----------|-----------|-----------|
| 1 | -0.896474 | 5.347351  | -1.468593 |
| 1 | 1.588488  | 5.314801  | -0.384298 |
| 7 | 1.202424  | 0.806228  | 1.985844  |
| 6 | 1.703584  | -0.115972 | 2.877069  |
| 6 | 2.136178  | 1.814405  | 1.940592  |
| 6 | 2.982537  | 0.316119  | 3.391751  |
| 6 | 3.250511  | 1.516749  | 2.809208  |
| 1 | 3.573410  | -0.229258 | 4.117480  |
| 1 | 4.109377  | 2.160385  | 2.954112  |
| 7 | -1.002165 | -0.981997 | 1.959771  |
| 6 | -2.192047 | -1.676864 | 1.920425  |
| 6 | -0.196011 | -1.690074 | 2.825202  |
| 6 | -2.108746 | -2.872583 | 2.724218  |
| 6 | -0.869265 | -2.879482 | 3.289303  |
| 1 | -2.914151 | -3.584349 | 2.857672  |
| 1 | -0.447361 | -3.599030 | 3.980318  |
| 7 | -2.476286 | 0.856749  | 0.377740  |
| 6 | -3.493585 | -0.039661 | 0.615657  |
| 6 | -3.057772 | 1.894268  | -0.313355 |
| 6 | -4.738525 | 0.445593  | 0.066434  |
| 6 | -4.466438 | 1.647921  | -0.512297 |
| 1 | -5.688428 | -0.070108 | 0.137276  |
| 1 | -5.145450 | 2.322407  | -1.019021 |
| 6 | 0.180944  | -0.129269 | -0.792947 |
| 6 | -2.392626 | 3.028358  | -0.757991 |
| 6 | -3.352356 | -1.244020 | 1.290781  |
| 6 | 2.035006  | 2.962831  | 1.166352  |
| 6 | 1.067080  | -1.292854 | 3.249270  |
| 1 | -4.234438 | -1.871348 | 1.386153  |
| 1 | -2.964531 | 3.750394  | -1.333290 |
| 1 | 2.865327  | 3.662202  | 1.198572  |
| 1 | 1.578082  | -1.933968 | 3.962744  |
| 1 | 0.388353  | -1.272116 | -0.414835 |
| 6 | 1.478532  | 0.368017  | -1.352351 |
| 6 | 1.586847  | 1.081473  | -2.567341 |
| 6 | 2.678806  | 0.089908  | -0.661480 |
| 6 | 2.828329  | 1.485744  | -3.056403 |
| 1 | 0.687965  | 1.329193  | -3.114924 |
| 6 | 3.918786  | 0.478865  | -1.163195 |
| 1 | 2.634296  | -0.438479 | 0.281038  |
| 6 | 4.003696  | 1.181301  | -2.366765 |
| 1 | 2.873875  | 2.042901  | -3.989051 |
| 1 | 4.819451  | 0.242200  | -0.601836 |
| 1 | 4.969139  | 1.494068  | -2.756518 |
| 6 | -0.959527 | -0.208955 | -1.766148 |
| 8 | -1.684071 | -1.355150 | -1.647721 |
| 8 | -1.257320 | 0.647539  | -2.580448 |
| 6 | -2.834248 | -1.461581 | -2.515985 |
| 1 | -3.536577 | -0.661506 | -2.268683 |
| 1 | -2.511770 | -1.316327 | -3.552273 |

|   |           |           |           |
|---|-----------|-----------|-----------|
| 6 | -3.446227 | -2.833931 | -2.299031 |
| 1 | -4.332795 | -2.949297 | -2.932729 |
| 1 | -2.738634 | -3.630371 | -2.554812 |
| 1 | -3.747457 | -2.961894 | -1.254746 |
| 6 | 0.647458  | -2.804699 | -0.606900 |
| 6 | 0.768438  | -3.168379 | -2.066392 |
| 6 | 1.793669  | -3.040513 | 0.229557  |
| 6 | 2.183378  | -2.961805 | -2.626160 |
| 1 | 0.024400  | -2.632540 | -2.658349 |
| 1 | 0.489854  | -4.235219 | -2.136501 |
| 6 | 2.989282  | -3.430770 | -0.283361 |
| 1 | 1.676405  | -2.920056 | 1.300894  |
| 6 | 3.243882  | -3.637720 | -1.746110 |
| 1 | 2.237799  | -3.350188 | -3.649373 |
| 1 | 2.394733  | -1.889770 | -2.678169 |
| 1 | 3.804178  | -3.657121 | 0.402814  |
| 1 | 3.273756  | -4.724695 | -1.936674 |
| 1 | 4.247182  | -3.272064 | -2.001767 |
| 1 | -0.333110 | -2.938541 | -0.156126 |

---

**<sup>10</sup>SS<sup>+</sup>TS(C-D)<sub>Fe</sub>**

---

Number of imaginary frequencies: 1    Electronic energy:    HF=-1883.9519413  
Zero-point correction=                    0.596982 (Hartree/Particle)  
Thermal correction to Energy=            0.632936  
Thermal correction to Enthalpy=         0.633880  
Thermal correction to Gibbs Free Energy= 0.530247  
Sum of electronic and zero-point Energies= -1883.354960  
Sum of electronic and thermal Energies= -1883.319005  
Sum of electronic and thermal Enthalpies= -1883.318061  
Sum of electronic and thermal Free Energies= -1883.421694

---

Cartesian Coordinates

---

|    |           |           |           |
|----|-----------|-----------|-----------|
| 26 | -0.537506 | 0.675679  | 0.911056  |
| 7  | 0.032354  | 2.556537  | 0.466213  |
| 6  | -0.621802 | 3.442504  | -0.360441 |
| 6  | 1.232121  | 3.161212  | 0.768975  |
| 6  | 0.186708  | 4.613948  | -0.590977 |
| 6  | 1.335273  | 4.442336  | 0.117145  |
| 1  | -0.111112 | 5.456434  | -1.202294 |
| 1  | 2.181070  | 5.112068  | 0.206681  |
| 7  | 1.083147  | 0.507052  | 2.095787  |
| 6  | 1.422024  | -0.567570 | 2.888015  |
| 6  | 2.122495  | 1.401274  | 2.233851  |
| 6  | 2.700544  | -0.351445 | 3.518857  |
| 6  | 3.132569  | 0.875006  | 3.116257  |
| 1  | 3.180371  | -1.048498 | 4.194403  |
| 1  | 4.043023  | 1.393567  | 3.389008  |
| 7  | -1.321219 | -0.949351 | 1.798395  |

|   |           |           |           |
|---|-----------|-----------|-----------|
| 6 | -2.598615 | -1.452727 | 1.672345  |
| 6 | -0.654116 | -1.853704 | 2.597874  |
| 6 | -2.721485 | -2.708557 | 2.367566  |
| 6 | -1.511192 | -2.961823 | 2.937080  |
| 1 | -3.628865 | -3.296965 | 2.421003  |
| 1 | -1.218118 | -3.800741 | 3.555727  |
| 7 | -2.398949 | 1.139303  | 0.239236  |
| 6 | -3.552324 | 0.395079  | 0.365226  |
| 6 | -2.757541 | 2.238465  | -0.508506 |
| 6 | -4.651329 | 1.042231  | -0.307563 |
| 6 | -4.153717 | 2.182093  | -0.860987 |
| 1 | -5.665215 | 0.663103  | -0.337515 |
| 1 | -4.673020 | 2.933948  | -1.441581 |
| 6 | 0.170072  | -0.094017 | -0.769440 |
| 6 | -1.914610 | 3.288075  | -0.837464 |
| 6 | -3.647173 | -0.821909 | 1.020929  |
| 6 | 2.205018  | 2.631792  | 1.601934  |
| 6 | 0.628842  | -1.686126 | 3.097391  |
| 1 | -4.615404 | -1.313634 | 1.033505  |
| 1 | -2.317402 | 4.079912  | -1.461346 |
| 1 | 3.097332  | 3.225998  | 1.772919  |
| 1 | 1.018950  | -2.463730 | 3.747666  |
| 1 | 0.511724  | -1.425254 | -0.517263 |
| 6 | 1.450166  | 0.485661  | -1.288079 |
| 6 | 1.522576  | 1.368804  | -2.388627 |
| 6 | 2.666711  | 0.118539  | -0.676743 |
| 6 | 2.750078  | 1.845600  | -2.847319 |
| 1 | 0.609381  | 1.670830  | -2.881666 |
| 6 | 3.892422  | 0.589745  | -1.144260 |
| 1 | 2.651105  | -0.560483 | 0.166298  |
| 6 | 3.943666  | 1.458957  | -2.235004 |
| 1 | 2.769681  | 2.524586  | -3.696593 |
| 1 | 4.808755  | 0.273584  | -0.651467 |
| 1 | 4.897727  | 1.829300  | -2.601813 |
| 6 | -0.951081 | -0.243493 | -1.759645 |
| 8 | -1.701908 | -1.352082 | -1.530737 |
| 8 | -1.197599 | 0.507589  | -2.688944 |
| 6 | -2.782325 | -1.579065 | -2.460417 |
| 1 | -3.517121 | -0.775774 | -2.350137 |
| 1 | -2.389092 | -1.530877 | -3.480818 |
| 6 | -3.378752 | -2.940165 | -2.149030 |
| 1 | -4.214976 | -3.143532 | -2.827652 |
| 1 | -2.634284 | -3.733383 | -2.274629 |
| 1 | -3.749056 | -2.977615 | -1.119949 |
| 6 | 0.745227  | -2.785930 | -0.630098 |
| 6 | 0.852870  | -3.152669 | -2.106052 |
| 6 | 1.906498  | -3.161156 | 0.175062  |
| 6 | 2.273437  | -2.959924 | -2.658278 |
| 1 | 0.133646  | -2.583467 | -2.701860 |
| 1 | 0.562402  | -4.211255 | -2.211513 |

|   |           |           |           |
|---|-----------|-----------|-----------|
| 6 | 3.071143  | -3.600804 | -0.353579 |
| 1 | 1.808094  | -3.096223 | 1.255091  |
| 6 | 3.310366  | -3.737280 | -1.833139 |
| 1 | 2.313775  | -3.274165 | -3.708355 |
| 1 | 2.524989  | -1.894283 | -2.633962 |
| 1 | 3.876666  | -3.904673 | 0.313986  |
| 1 | 3.288356  | -4.807427 | -2.100708 |
| 1 | 4.325355  | -3.396984 | -2.081425 |
| 1 | -0.213432 | -3.048615 | -0.178321 |

-----  
<sup>3</sup>TS(C-D)<sub>Fe</sub>  
 -----

Number of imaginary frequencies: 1    Electronic energy:    HF=-1883.9554463  
 Zero-point correction=                    0.596852 (Hartree/Particle)  
 Thermal correction to Energy=            0.633515  
 Thermal correction to Enthalpy=         0.634459  
 Thermal correction to Gibbs Free Energy= 0.524879  
 Sum of electronic and zero-point Energies= -1883.358595  
 Sum of electronic and thermal Energies= -1883.321931  
 Sum of electronic and thermal Enthalpies= -1883.320987  
 Sum of electronic and thermal Free Energies= -1883.430568

-----  
 Cartesian Coordinates  
 -----

|    |           |           |           |
|----|-----------|-----------|-----------|
| 26 | -0.894792 | 0.933253  | 0.917332  |
| 7  | -1.895266 | 1.947291  | -0.504462 |
| 6  | -3.110001 | 1.627169  | -1.062812 |
| 6  | -1.472708 | 3.079368  | -1.156476 |
| 6  | -3.459312 | 2.578598  | -2.091201 |
| 6  | -2.438483 | 3.474439  | -2.156240 |
| 1  | -4.367352 | 2.545428  | -2.679814 |
| 1  | -2.336305 | 4.334589  | -2.806061 |
| 7  | 0.463381  | 2.420894  | 1.019522  |
| 6  | 1.497171  | 2.553426  | 1.918881  |
| 6  | 0.566603  | 3.495838  | 0.170313  |
| 6  | 2.270674  | 3.735582  | 1.624568  |
| 6  | 1.697146  | 4.316018  | 0.534011  |
| 1  | 3.132933  | 4.066789  | 2.189896  |
| 1  | 1.992096  | 5.222553  | 0.020282  |
| 7  | -0.039849 | 0.067976  | 2.529130  |
| 6  | -0.438677 | -1.093369 | 3.148495  |
| 6  | 1.054766  | 0.513312  | 3.235967  |
| 6  | 0.435394  | -1.396158 | 4.256305  |
| 6  | 1.358398  | -0.394516 | 4.315577  |
| 1  | 0.333371  | -2.256289 | 4.906479  |
| 1  | 2.168438  | -0.265681 | 5.022703  |
| 7  | -2.406950 | -0.399430 | 1.008999  |
| 6  | -2.480921 | -1.505279 | 1.821108  |
| 6  | -3.560248 | -0.405715 | 0.259522  |
| 6  | -3.701481 | -2.233654 | 1.566630  |

|   |           |           |           |
|---|-----------|-----------|-----------|
| 6 | -4.376526 | -1.545721 | 0.603305  |
| 1 | -4.000464 | -3.137570 | 2.083039  |
| 1 | -5.339727 | -1.771753 | 0.162955  |
| 6 | 0.403401  | -0.443146 | -1.050313 |
| 6 | -3.895636 | 0.540905  | -0.701848 |
| 6 | -1.553322 | -1.848621 | 2.798448  |
| 6 | -0.314914 | 3.788981  | -0.864243 |
| 6 | 1.775637  | 1.668347  | 2.953444  |
| 1 | -1.748257 | -2.746831 | 3.377333  |
| 1 | -4.839660 | 0.411884  | -1.222986 |
| 1 | -0.107745 | 4.672895  | -1.460179 |
| 1 | 2.622713  | 1.897599  | 3.593538  |
| 1 | 0.911122  | -1.556489 | -0.254273 |
| 6 | 1.580193  | 0.138713  | -1.675698 |
| 6 | 1.762384  | 0.237073  | -3.080742 |
| 6 | 2.609874  | 0.639268  | -0.840099 |
| 6 | 2.908782  | 0.814783  | -3.611364 |
| 1 | 0.975345  | -0.111785 | -3.739228 |
| 6 | 3.770539  | 1.186981  | -1.378017 |
| 1 | 2.475465  | 0.591154  | 0.233265  |
| 6 | 3.921994  | 1.281257  | -2.763823 |
| 1 | 3.022701  | 0.896930  | -4.689179 |
| 1 | 4.547740  | 1.560846  | -0.717284 |
| 1 | 4.820683  | 1.724953  | -3.184865 |
| 6 | -0.646935 | -0.989989 | -1.913045 |
| 8 | -1.053481 | -2.248029 | -1.606482 |
| 8 | -1.193386 | -0.312204 | -2.775663 |
| 6 | -2.176296 | -2.744392 | -2.367950 |
| 1 | -3.026145 | -2.073276 | -2.217888 |
| 1 | -1.920456 | -2.728163 | -3.432992 |
| 6 | -2.475799 | -4.148542 | -1.875738 |
| 1 | -3.321681 | -4.564675 | -2.434725 |
| 1 | -1.614087 | -4.809919 | -2.016138 |
| 1 | -2.737154 | -4.134768 | -0.813137 |
| 6 | 1.386023  | -2.622786 | 0.133832  |
| 6 | 1.798049  | -3.542504 | -1.011841 |
| 6 | 2.485806  | -2.245544 | 1.044603  |
| 6 | 3.173273  | -3.175984 | -1.590185 |
| 1 | 1.029289  | -3.540317 | -1.789061 |
| 1 | 1.833438  | -4.568965 | -0.613873 |
| 6 | 3.780685  | -2.484091 | 0.761613  |
| 1 | 2.218467  | -1.763092 | 1.980547  |
| 6 | 4.253955  | -3.155901 | -0.498955 |
| 1 | 3.449264  | -3.884551 | -2.380466 |
| 1 | 3.118299  | -2.186819 | -2.057515 |
| 1 | 4.539732  | -2.216665 | 1.496210  |
| 1 | 4.567993  | -4.183925 | -0.252008 |
| 1 | 5.160034  | -2.656333 | -0.868134 |
| 1 | 0.493298  | -2.972466 | 0.661589  |

W- <sup>1</sup>CSSTs(C-D) Fe

-----  
Number of imaginary frequencies: 1    Electronic energy:    HF=-1883.3847599  
Zero-point correction=                    0.607417 (Hartree/Particle)  
Thermal correction to Energy=            0.642255  
Thermal correction to Enthalpy=         0.643199  
Thermal correction to Gibbs Free Energy= 0.543408  
Sum of electronic and zero-point Energies= -1882.777343  
Sum of electronic and thermal Energies= -1882.742505  
Sum of electronic and thermal Enthalpies= -1882.741561  
Sum of electronic and thermal Free Energies= -1882.841352  
-----

Cartesian Coordinates

-----  
26    -0.367509   0.698549   1.072661  
7      -0.908239   2.422574   0.209559  
6      -2.161676   2.797309   -0.180950  
6      -0.073321   3.411437   -0.224597  
6      -2.118032   4.057781   -0.885322  
6      -0.818484   4.431248   -0.927212  
1      -2.981244   4.568216   -1.292315  
1      -0.384670   5.319490   -1.367984  
7      1.455336   1.479457   1.425528  
6      2.459905   0.947294   2.186910  
6      1.977927   2.606888   0.862708  
6      3.644235   1.768493   2.109430  
6      3.349761   2.790945   1.271130  
1      4.572350   1.566994   2.629001  
1      3.982502   3.611557   0.958719  
7      0.104825   -0.873634   2.237415  
6      -0.699686   -1.938342   2.544272  
6      1.291602   -1.106826   2.879293  
6      0.008535   -2.884871   3.367873  
6      1.243994   -2.361653   3.584993  
1      -0.408236   -3.808481   3.749130  
1      2.052177   -2.768754   4.179346  
7      -2.291060   0.124785   1.117001  
6      -2.781954   -1.071233   1.560859  
6      -3.367496   0.814679   0.639032  
6      -4.208607   -1.140008   1.354779  
6      -4.574854   0.039011   0.793808  
1      -4.835733   -1.977004   1.635218  
1      -5.564608   0.370537   0.506307  
6      0.061691   -0.144152   -0.833147  
6      -3.315120   2.063949   0.036001  
6      -2.035565   -2.058184   2.184136  
6      1.282869   3.484363   0.044268  
6      2.389564   -0.256154   2.867181  
1      -2.557237   -2.958862   2.495529  
1      -4.250820   2.486813   -0.318082

|   |           |           |           |
|---|-----------|-----------|-----------|
| 1 | 1.828871  | 4.331979  | -0.358759 |
| 1 | 3.266946  | -0.567247 | 3.427124  |
| 1 | 0.045325  | -1.207247 | -0.342033 |
| 6 | 1.397070  | 0.176891  | -1.375919 |
| 6 | 1.605668  | 0.907151  | -2.558832 |
| 6 | 2.531461  | -0.281475 | -0.681553 |
| 6 | 2.892881  | 1.139786  | -3.029505 |
| 1 | 0.752530  | 1.301576  | -3.094721 |
| 6 | 3.813963  | -0.059860 | -1.163110 |
| 1 | 2.399136  | -0.798518 | 0.258609  |
| 6 | 4.003328  | 0.647361  | -2.347276 |
| 1 | 3.027983  | 1.713415  | -3.942334 |
| 1 | 4.666998  | -0.422484 | -0.596424 |
| 1 | 5.005462  | 0.831842  | -2.723704 |
| 6 | -1.115067 | 0.038347  | -1.722549 |
| 8 | -2.035576 | -0.940601 | -1.588034 |
| 8 | -1.284109 | 0.965758  | -2.487878 |
| 6 | -3.211956 | -0.815660 | -2.391162 |
| 1 | -3.785069 | 0.048078  | -2.042474 |
| 1 | -2.920312 | -0.630017 | -3.429714 |
| 6 | -3.990145 | -2.105637 | -2.240912 |
| 1 | -4.910174 | -2.058362 | -2.832248 |
| 1 | -3.399931 | -2.959624 | -2.590426 |
| 1 | -4.256716 | -2.266442 | -1.192701 |
| 6 | 0.082677  | -2.648216 | -0.849425 |
| 6 | 0.133645  | -2.898822 | -2.333301 |
| 6 | 1.203713  | -3.103842 | -0.067512 |
| 6 | 1.536107  | -2.778722 | -2.935310 |
| 1 | -0.580116 | -2.263624 | -2.858981 |
| 1 | -0.239409 | -3.929724 | -2.453873 |
| 6 | 2.350119  | -3.504632 | -0.655607 |
| 1 | 1.112054  | -3.114792 | 1.012974  |
| 6 | 2.576580  | -3.562171 | -2.132503 |
| 1 | 1.516540  | -3.134741 | -3.970211 |
| 1 | 1.827222  | -1.727371 | -2.967804 |
| 1 | 3.155371  | -3.869943 | -0.020870 |
| 1 | 2.576856  | -4.625408 | -2.421177 |
| 1 | 3.583947  | -3.192205 | -2.357404 |
| 1 | -0.903323 | -2.720308 | -0.391961 |

---

**W- <sup>10</sup>SS<sup>TS</sup>(C-D)<sub>Fe</sub>**

---

Number of imaginary frequencies: 1    Electronic energy:    HF=-1883.3940076  
Zero-point correction=                    0.604802 (Hartree/Particle)  
Thermal correction to Energy=            0.639886  
Thermal correction to Enthalpy=         0.640831  
Thermal correction to Gibbs Free Energy= 0.540077  
Sum of electronic and zero-point Energies= -1882.789206  
Sum of electronic and thermal Energies= -1882.754121  
Sum of electronic and thermal Enthalpies= -1882.753177

Sum of electronic and thermal Free Energies= -1882.853931

.....  
Cartesian Coordinates  
.....

|    |           |           |           |
|----|-----------|-----------|-----------|
| 26 | -0.436229 | 0.681835  | 0.982888  |
| 7  | 0.443135  | 2.442528  | 0.632619  |
| 6  | -0.035576 | 3.443618  | -0.169187 |
| 6  | 1.734286  | 2.798242  | 0.922683  |
| 6  | 0.973435  | 4.445340  | -0.389880 |
| 6  | 2.071067  | 4.048159  | 0.296873  |
| 1  | 0.835518  | 5.336045  | -0.988617 |
| 1  | 3.031950  | 4.538239  | 0.379927  |
| 7  | 1.142665  | 0.143606  | 2.076236  |
| 6  | 1.322100  | -1.053126 | 2.717561  |
| 6  | 2.322612  | 0.820742  | 2.235897  |
| 6  | 2.642062  | -1.134460 | 3.282034  |
| 6  | 3.261594  | 0.035683  | 2.988556  |
| 1  | 3.023521  | -1.980304 | 3.839031  |
| 1  | 4.262635  | 0.354280  | 3.247861  |
| 7  | -1.457779 | -0.861108 | 1.715729  |
| 6  | -2.789849 | -1.142248 | 1.563128  |
| 6  | -0.932042 | -1.945750 | 2.370563  |
| 6  | -3.100117 | -2.440364 | 2.096819  |
| 6  | -1.942371 | -2.944916 | 2.590845  |
| 1  | -4.085833 | -2.887151 | 2.096171  |
| 1  | -1.774202 | -3.893631 | 3.083565  |
| 7  | -2.177214 | 1.476827  | 0.352864  |
| 6  | -3.432216 | 0.932243  | 0.442302  |
| 6  | -2.337293 | 2.637552  | -0.356197 |
| 6  | -4.400752 | 1.776460  | -0.206472 |
| 6  | -3.716201 | 2.827701  | -0.719377 |
| 1  | -5.461579 | 1.568761  | -0.259831 |
| 1  | -4.093927 | 3.670786  | -1.282596 |
| 6  | 0.141170  | -0.072663 | -0.726224 |
| 6  | -1.327930 | 3.531960  | -0.653143 |
| 6  | -3.726964 | -0.293254 | 1.004576  |
| 6  | 2.609257  | 2.058734  | 1.692742  |
| 6  | 0.364682  | -2.043767 | 2.836361  |
| 1  | -4.760917 | -0.624026 | 0.985209  |
| 1  | -1.580256 | 4.394342  | -1.261582 |
| 1  | 3.603428  | 2.462323  | 1.854585  |
| 1  | 0.640971  | -2.949631 | 3.367639  |
| 1  | 0.249979  | -1.446584 | -0.544963 |
| 6  | 1.495768  | 0.347159  | -1.184296 |
| 6  | 1.707561  | 1.348214  | -2.147079 |
| 6  | 2.624901  | -0.278371 | -0.635631 |
| 6  | 2.995515  | 1.696896  | -2.537696 |
| 1  | 0.854226  | 1.849617  | -2.583360 |
| 6  | 3.910582  | 0.062118  | -1.037526 |
| 1  | 2.492636  | -1.051629 | 0.110979  |



|   |           |           |           |
|---|-----------|-----------|-----------|
| 6 | 4.104772  | 1.056008  | -1.991769 |
| 1 | 3.130254  | 2.479447  | -3.279363 |
| 1 | 4.760431  | -0.450191 | -0.594739 |
| 1 | 5.108065  | 1.329573  | -2.306382 |
| 6 | -0.981823 | 0.009294  | -1.706941 |
| 8 | -1.919933 | -0.924652 | -1.458457 |
| 8 | -1.080537 | 0.784346  | -2.637842 |
| 6 | -3.029000 | -0.961573 | -2.356415 |
| 1 | -3.634434 | -0.060748 | -2.211036 |
| 1 | -2.658951 | -0.952951 | -3.386436 |
| 6 | -3.804577 | -2.225850 | -2.049522 |
| 1 | -4.678094 | -2.300379 | -2.705152 |
| 1 | -3.176183 | -3.108574 | -2.205321 |
| 1 | -4.143552 | -2.227599 | -1.009631 |
| 6 | 0.251945  | -2.791584 | -0.748148 |
| 6 | 0.236386  | -3.031152 | -2.248746 |
| 6 | 1.405551  | -3.385790 | -0.071017 |
| 6 | 1.617223  | -2.814665 | -2.873673 |
| 1 | -0.504586 | -2.393694 | -2.737455 |
| 1 | -0.086162 | -4.069793 | -2.421775 |
| 6 | 2.506922  | -3.800336 | -0.723212 |
| 1 | 1.359993  | -3.487699 | 1.008888  |
| 6 | 2.682045  | -3.697099 | -2.212430 |
| 1 | 1.578628  | -3.017971 | -3.949575 |
| 1 | 1.898176  | -1.763321 | -2.758589 |
| 1 | 3.318731  | -4.256760 | -0.159496 |
| 1 | 2.654583  | -4.712387 | -2.638059 |
| 1 | 3.682822  | -3.306701 | -2.438393 |
| 1 | -0.706142 | -2.974842 | -0.256460 |

---

**W- <sup>3</sup>TS(C-D) Fe**

---

Number of imaginary frequencies: 1    Electronic energy:    HF=-1883.392883  
Zero-point correction=                    0.605307 (Hartree/Particle)  
Thermal correction to Energy=            0.640683  
Thermal correction to Enthalpy=         0.641628  
Thermal correction to Gibbs Free Energy= 0.538318  
Sum of electronic and zero-point Energies= -1882.787576  
Sum of electronic and thermal Energies= -1882.752200  
Sum of electronic and thermal Enthalpies= -1882.751255  
Sum of electronic and thermal Free Energies= -1882.854565

---

Cartesian Coordinates

---

|    |           |          |           |
|----|-----------|----------|-----------|
| 26 | -0.446181 | 0.774280 | 1.076564  |
| 7  | -1.027322 | 2.416376 | 0.076879  |
| 6  | -2.279811 | 2.713635 | -0.379074 |
| 6  | -0.219869 | 3.421341 | -0.370677 |
| 6  | -2.261053 | 3.937941 | -1.146544 |
| 6  | -0.979353 | 4.368939 | -1.155212 |

|   |           |           |           |
|---|-----------|-----------|-----------|
| 1 | -3.128015 | 4.385906  | -1.614191 |
| 1 | -0.566628 | 5.252992  | -1.623609 |
| 7 | 1.321912  | 1.669553  | 1.469486  |
| 6 | 2.331675  | 1.199255  | 2.262050  |
| 6 | 1.821597  | 2.773609  | 0.839019  |
| 6 | 3.493397  | 2.040602  | 2.144462  |
| 6 | 3.180357  | 3.011582  | 1.248067  |
| 1 | 4.423911  | 1.889965  | 2.676720  |
| 1 | 3.799712  | 3.824911  | 0.892798  |
| 7 | 0.046167  | -0.709438 | 2.332044  |
| 6 | -0.727788 | -1.786863 | 2.666733  |
| 6 | 1.211957  | -0.853313 | 3.033897  |
| 6 | -0.015422 | -2.655658 | 3.572480  |
| 6 | 1.184055  | -2.069105 | 3.810939  |
| 1 | -0.409339 | -3.575878 | 3.984420  |
| 1 | 1.984117  | -2.408752 | 4.456103  |
| 7 | -2.362345 | 0.129524  | 1.086245  |
| 6 | -2.806715 | -1.072368 | 1.557448  |
| 6 | -3.440665 | 0.730139  | 0.501255  |
| 6 | -4.207385 | -1.234872 | 1.268155  |
| 6 | -4.605423 | -0.107096 | 0.622562  |
| 1 | -4.802099 | -2.096070 | 1.545600  |
| 1 | -5.591259 | 0.144681  | 0.252812  |
| 6 | 0.092811  | -0.147936 | -0.942161 |
| 6 | -3.411700 | 1.945682  | -0.169617 |
| 6 | -2.039814 | -1.987504 | 2.265988  |
| 6 | 1.119461  | 3.571803  | -0.053040 |
| 6 | 2.281127  | 0.029283  | 3.005813  |
| 1 | -2.529807 | -2.897797 | 2.599060  |
| 1 | -4.344316 | 2.303528  | -0.595416 |
| 1 | 1.645289  | 4.416584  | -0.487365 |
| 1 | 3.153604  | -0.223982 | 3.600878  |
| 1 | 0.223998  | -1.504864 | -0.556189 |
| 6 | 1.391059  | 0.188570  | -1.518183 |
| 6 | 1.565833  | 0.735909  | -2.805816 |
| 6 | 2.536830  | -0.055966 | -0.735904 |
| 6 | 2.837759  | 1.019853  | -3.280986 |
| 1 | 0.694180  | 0.958327  | -3.408998 |
| 6 | 3.808124  | 0.198868  | -1.229304 |
| 1 | 2.412911  | -0.456968 | 0.261352  |
| 6 | 3.962206  | 0.740013  | -2.503033 |
| 1 | 2.956690  | 1.455400  | -4.268796 |
| 1 | 4.675676  | -0.004598 | -0.609189 |
| 1 | 4.955295  | 0.956111  | -2.886899 |
| 6 | -1.091391 | -0.136645 | -1.832645 |
| 8 | -1.883564 | -1.209781 | -1.683296 |
| 8 | -1.377396 | 0.796474  | -2.558888 |
| 6 | -3.096762 | -1.209278 | -2.443034 |
| 1 | -3.720373 | -0.377084 | -2.104369 |
| 1 | -2.860013 | -1.048415 | -3.499666 |

|   |           |           |           |
|---|-----------|-----------|-----------|
| 6 | -3.765326 | -2.546149 | -2.205269 |
| 1 | -4.708071 | -2.596076 | -2.759376 |
| 1 | -3.123372 | -3.367963 | -2.538574 |
| 1 | -3.978715 | -2.675854 | -1.140562 |
| 6 | 0.347315  | -2.721896 | -0.615819 |
| 6 | 0.428477  | -3.243924 | -2.041374 |
| 6 | 1.537556  | -3.009673 | 0.204736  |
| 6 | 1.812018  | -3.036182 | -2.665179 |
| 1 | -0.350406 | -2.785291 | -2.655186 |
| 1 | 0.202589  | -4.319878 | -2.003307 |
| 6 | 2.700019  | -3.409859 | -0.329993 |
| 1 | 1.453079  | -2.876482 | 1.278434  |
| 6 | 2.921955  | -3.636059 | -1.797503 |
| 1 | 1.837498  | -3.482171 | -3.665419 |
| 1 | 1.997303  | -1.966327 | -2.793183 |
| 1 | 3.535395  | -3.627702 | 0.333396  |
| 1 | 3.000271  | -4.720813 | -1.968864 |
| 1 | 3.893048  | -3.216792 | -2.089156 |
| 1 | -0.595328 | -2.965637 | -0.118453 |

---

**Conf1**

---

|                                              |                             |                   |
|----------------------------------------------|-----------------------------|-------------------|
| Number of imaginary frequencies: 11          | Electronic energy:          | HF=-5382.32996648 |
| Zero-point correction=                       | 2.261473 (Hartree/Particle) |                   |
| Thermal correction to Energy=                | 2.394744                    |                   |
| Thermal correction to Enthalpy=              | 2.395688                    |                   |
| Thermal correction to Gibbs Free Energy=     | 2.052514                    |                   |
| Sum of electronic and zero-point Energies=   | -5380.068494                |                   |
| Sum of electronic and thermal Energies=      | -5379.935223                |                   |
| Sum of electronic and thermal Enthalpies=    | -5379.934278                |                   |
| Sum of electronic and thermal Free Energies= | -5380.277452                |                   |

---

Cartesian Coordinates

---

|   |          |           |           |
|---|----------|-----------|-----------|
| 6 | 3.206294 | 6.629563  | -3.731618 |
| 6 | 2.153051 | 7.670162  | -3.333022 |
| 6 | 1.886598 | 8.765573  | -4.385306 |
| 6 | 0.695647 | 9.639720  | -3.963957 |
| 6 | 3.124156 | 9.636189  | -4.653647 |
| 6 | 6.191664 | -4.114068 | -4.393527 |
| 6 | 7.283009 | -3.198724 | -3.855742 |
| 8 | 8.436604 | -3.569574 | -3.666328 |
| 6 | 5.862824 | -5.327486 | -3.483658 |
| 6 | 7.013160 | -6.342651 | -3.414358 |
| 6 | 5.413288 | -4.885103 | -2.083344 |
| 7 | 6.893837 | -1.908639 | -3.573156 |
| 6 | 7.877048 | -0.900431 | -3.187245 |
| 6 | 8.306413 | -0.979335 | -1.707015 |
| 8 | 9.352462 | -0.454213 | -1.345526 |
| 6 | 7.357604 | 0.507923  | -3.496991 |

|    |            |           |           |
|----|------------|-----------|-----------|
| 7  | 7.431158   | -1.605534 | -0.873523 |
| 6  | 7.702552   | -1.819538 | 0.535800  |
| 6  | 6.815287   | -0.983274 | 1.484562  |
| 6  | 7.052045   | 0.509664  | 1.399690  |
| 6  | 6.189902   | 1.339099  | 0.670343  |
| 6  | 8.151735   | 1.095902  | 2.043905  |
| 6  | 6.419585   | 2.714695  | 0.585144  |
| 6  | 8.385418   | 2.468918  | 1.961722  |
| 6  | 7.518058   | 3.284492  | 1.230380  |
| 6  | 0.631966   | -2.844843 | -4.585066 |
| 6  | 0.166074   | -3.967144 | -3.664248 |
| 8  | 0.925805   | -4.583915 | -2.903906 |
| 6  | 2.147509   | -2.654686 | -4.574808 |
| 7  | -1.157020  | -4.231776 | -3.760740 |
| 6  | -1.838415  | -5.111186 | -2.834886 |
| 6  | 0.103589   | -7.228026 | 1.610397  |
| 6  | 0.934247   | -6.585780 | 0.496424  |
| 8  | 0.053011   | -6.363105 | -0.602726 |
| 6  | 2.120891   | -7.459074 | 0.074876  |
| 6  | 3.456181   | -3.494206 | 6.571312  |
| 6  | 2.321854   | -4.529425 | 6.589621  |
| 6  | 2.054122   | -5.083129 | 5.182631  |
| 6  | 2.624205   | -5.661406 | 7.582447  |
| 6  | 6.949953   | 3.401915  | 6.146951  |
| 6  | 5.542599   | 3.231694  | 5.585916  |
| 8  | 4.647157   | 3.721596  | 6.588995  |
| 6  | 5.230647   | 1.778263  | 5.225388  |
| 6  | -3.118180  | 1.253599  | 5.829510  |
| 6  | -3.647297  | 2.644972  | 5.434597  |
| 6  | -5.146710  | 2.659068  | 5.215071  |
| 6  | -6.018105  | 3.046924  | 6.242573  |
| 6  | -5.694379  | 2.250944  | 3.989265  |
| 6  | -7.402376  | 3.028137  | 6.058551  |
| 6  | -7.078097  | 2.230085  | 3.804536  |
| 6  | -7.937313  | 2.617762  | 4.835772  |
| 6  | -5.656015  | 0.907523  | -1.983282 |
| 6  | -7.004627  | 0.213604  | -1.885828 |
| 8  | -7.984698  | 0.568749  | -2.545674 |
| 6  | -5.201803  | 1.743322  | -0.757816 |
| 16 | -4.332719  | 0.828599  | 0.584777  |
| 7  | -7.056334  | -0.876695 | -1.060888 |
| 6  | -8.311077  | -1.595644 | -0.880008 |
| 6  | -8.659724  | -2.507188 | -2.067599 |
| 6  | -10.048726 | -3.166721 | -1.971870 |
| 6  | -10.394046 | -3.885129 | -3.285415 |
| 6  | -10.165276 | -4.135303 | -0.783545 |
| 26 | -1.904262  | 0.365543  | -0.033524 |
| 6  | -1.431592  | 3.732715  | -0.291248 |
| 6  | -0.999295  | 0.479980  | 3.250967  |
| 6  | -3.250000  | -2.701296 | 0.411984  |

|   |           |           |           |
|---|-----------|-----------|-----------|
| 6 | -2.588927 | 0.209649  | -3.391483 |
| 7 | -1.354177 | 1.835823  | 1.251900  |
| 6 | -1.185954 | 3.155574  | 0.951496  |
| 6 | -0.648323 | 3.875113  | 2.102014  |
| 6 | -0.466512 | 2.941521  | 3.086199  |
| 6 | -0.939176 | 1.674024  | 2.542701  |
| 6 | 0.133929  | 3.128660  | 4.447721  |
| 6 | -0.310545 | 5.339578  | 2.130944  |
| 6 | 1.068697  | 5.676246  | 1.523663  |
| 6 | 1.382476  | 7.175614  | 1.549924  |
| 7 | -2.033377 | -0.903796 | 1.522580  |
| 6 | -1.563852 | -0.708949 | 2.790458  |
| 6 | -1.801036 | -1.882230 | 3.612589  |
| 6 | -2.487024 | -2.775149 | 2.819702  |
| 6 | -2.611184 | -2.138125 | 1.510379  |
| 6 | -1.330824 | -2.063373 | 5.023427  |
| 6 | -2.957904 | -4.119539 | 3.124030  |
| 6 | -3.284559 | -4.619918 | 4.328195  |
| 7 | -2.652757 | -1.029584 | -1.288203 |
| 6 | -3.284433 | -2.175362 | -0.877355 |
| 6 | -3.953523 | -2.809438 | -1.990027 |
| 6 | -3.622672 | -2.079229 | -3.114736 |
| 6 | -2.845781 | -0.934649 | -2.635416 |
| 6 | -4.854180 | -4.002341 | -1.872237 |
| 6 | -4.013829 | -2.403036 | -4.480371 |
| 6 | -3.369526 | -2.104857 | -5.625550 |
| 7 | -1.981276 | 1.708665  | -1.553343 |
| 6 | -2.245191 | 1.452454  | -2.871065 |
| 6 | -2.215289 | 2.683677  | -3.646965 |
| 6 | -1.945654 | 3.692276  | -2.759322 |
| 6 | -1.787853 | 3.057563  | -1.455560 |
| 6 | -2.490282 | 2.778470  | -5.119055 |
| 6 | -1.885677 | 5.171267  | -3.020981 |
| 6 | -3.196128 | 5.912733  | -2.677522 |
| 6 | -3.116510 | 7.419196  | -2.943306 |
| 1 | 8.756265  | -1.571883 | 0.688392  |
| 1 | 7.566459  | -2.884053 | 0.766315  |
| 1 | 6.539458  | -4.484116 | -5.366440 |
| 1 | 5.268456  | -3.548847 | -4.574181 |
| 1 | 3.627701  | -3.069926 | 7.568370  |
| 1 | 4.397266  | -3.952132 | 6.237701  |
| 1 | 3.228146  | -2.666778 | 5.888808  |
| 1 | 7.697198  | 3.102995  | 5.403866  |
| 1 | 7.126342  | 4.447012  | 6.422214  |
| 1 | 7.078329  | 2.785258  | 7.044213  |
| 1 | 3.299030  | 5.854806  | -2.963411 |
| 1 | 2.934787  | 6.133152  | -4.671754 |
| 1 | 4.197055  | 7.078419  | -3.866831 |
| 1 | 0.722376  | -7.421995 | 2.493975  |
| 1 | -0.718450 | -6.566247 | 1.901148  |

|   |           |           |           |
|---|-----------|-----------|-----------|
| 1 | -0.322171 | -8.178000 | 1.265002  |
| 1 | -2.043083 | 1.282713  | 6.038563  |
| 1 | -3.626263 | 0.889650  | 6.731733  |
| 1 | -3.290334 | 0.531314  | 5.027182  |
| 1 | -2.828062 | -5.337847 | -3.235397 |
| 1 | -1.281084 | -6.044251 | -2.727771 |
| 1 | -1.944883 | -4.665362 | -1.842160 |
| 1 | 0.147953  | -1.921312 | -4.255924 |
| 1 | 0.275119  | -3.059908 | -5.602101 |
| 1 | -5.749764 | 1.573693  | -2.849369 |
| 1 | -4.892211 | 0.169421  | -2.214561 |
| 1 | -9.123738 | -0.869051 | -0.745769 |
| 1 | -8.224687 | -2.174607 | 0.045643  |
| 1 | -4.059180 | 7.919692  | -2.692853 |
| 1 | -2.323287 | 7.887229  | -2.345756 |
| 1 | -2.900181 | 7.626505  | -3.999615 |
| 1 | 2.366851  | 7.387352  | 1.115395  |
| 1 | 0.637415  | 7.746498  | 0.981282  |
| 1 | 1.380919  | 7.564327  | 2.576310  |
| 1 | 2.449795  | 8.149762  | -2.388019 |
| 1 | 1.206861  | 7.151592  | -3.124767 |
| 1 | 1.617823  | 8.261779  | -5.327372 |
| 1 | 0.470006  | 10.399527 | -4.722278 |
| 1 | -0.208253 | 9.038279  | -3.811190 |
| 1 | 0.909178  | 10.163935 | -3.022839 |
| 1 | 2.905355  | 10.409811 | -5.399852 |
| 1 | 3.449071  | 10.143872 | -3.735326 |
| 1 | 3.969737  | 9.048076  | -5.026542 |
| 1 | 5.005462  | -5.823592 | -3.960061 |
| 1 | 6.720380  | -7.209225 | -2.809086 |
| 1 | 7.279328  | -6.705621 | -4.414733 |
| 1 | 7.909663  | -5.894720 | -2.977246 |
| 1 | 5.095341  | -5.748479 | -1.487896 |
| 1 | 6.235137  | -4.399286 | -1.540894 |
| 1 | 4.564284  | -4.192582 | -2.132784 |
| 1 | 5.974677  | -1.601608 | -3.861646 |
| 1 | 8.796003  | -1.090099 | -3.749951 |
| 1 | 8.106289  | 1.242725  | -3.191097 |
| 1 | 7.163724  | 0.626070  | -4.569110 |
| 1 | 6.433543  | 0.719447  | -2.945169 |
| 1 | 6.634594  | -2.062485 | -1.295671 |
| 1 | 7.019561  | -1.332677 | 2.506047  |
| 1 | 5.759464  | -1.205286 | 1.286655  |
| 1 | 5.318495  | 0.907175  | 0.185765  |
| 1 | 8.833938  | 0.468083  | 2.613703  |
| 1 | 5.734136  | 3.340787  | 0.019286  |
| 1 | 9.245499  | 2.901735  | 2.466666  |
| 1 | 7.696488  | 4.354825  | 1.166964  |
| 1 | 2.435925  | -1.861347 | -5.274588 |
| 1 | 2.480764  | -2.370001 | -3.573144 |

|   |            |           |           |
|---|------------|-----------|-----------|
| 1 | 2.667041   | -3.576661 | -4.858656 |
| 1 | -1.732940  | -3.594373 | -4.296963 |
| 1 | 1.318495   | -5.621588 | 0.867667  |
| 1 | 0.500748   | -5.827376 | -1.289239 |
| 1 | 2.686186   | -6.976461 | -0.732012 |
| 1 | 2.807722   | -7.633343 | 0.912973  |
| 1 | 1.765666   | -8.429063 | -0.293403 |
| 1 | 1.407587   | -4.019625 | 6.928501  |
| 1 | 1.228194   | -5.804485 | 5.187426  |
| 1 | 1.789716   | -4.283524 | 4.480919  |
| 1 | 2.942619   | -5.595412 | 4.788992  |
| 1 | 1.800884   | -6.384800 | 7.625306  |
| 1 | 3.531049   | -6.206988 | 7.288091  |
| 1 | 2.784227   | -5.273246 | 8.596083  |
| 1 | 5.451782   | 3.847270  | 4.674709  |
| 1 | 3.743323   | 3.586071  | 6.263560  |
| 1 | 4.206391   | 1.679981  | 4.842690  |
| 1 | 5.910161   | 1.411792  | 4.447157  |
| 1 | 5.326290   | 1.138188  | 6.110555  |
| 1 | -3.137683  | 2.970620  | 4.519999  |
| 1 | -3.387203  | 3.367456  | 6.220477  |
| 1 | -5.605849  | 3.370948  | 7.197234  |
| 1 | -5.047203  | 1.948369  | 3.166214  |
| 1 | -8.060641  | 3.337117  | 6.867973  |
| 1 | -7.478251  | 1.910146  | 2.845879  |
| 1 | -9.014670  | 2.603478  | 4.686869  |
| 1 | -6.069703  | 2.250881  | -0.317652 |
| 1 | -4.536144  | 2.528795  | -1.128098 |
| 1 | -6.297471  | -0.980227 | -0.390859 |
| 1 | -7.891083  | -3.286576 | -2.171446 |
| 1 | -8.617825  | -1.889317 | -2.970786 |
| 1 | -10.787860 | -2.363461 | -1.826893 |
| 1 | -11.159384 | -4.598815 | -0.748033 |
| 1 | -9.425507  | -4.943281 | -0.866021 |
| 1 | -10.002114 | -3.632602 | 0.175991  |
| 1 | -1.287295  | 4.805167  | -0.370262 |
| 1 | -0.635036  | 0.493358  | 4.271195  |
| 1 | -3.761839  | -3.644655 | 0.566897  |
| 1 | -2.836254  | 0.173053  | -4.444544 |
| 1 | -0.539614  | 2.799386  | 5.247964  |
| 1 | 1.063257   | 2.550990  | 4.552850  |
| 1 | 0.374478   | 4.180598  | 4.634607  |
| 1 | -0.335956  | 5.703914  | 3.166766  |
| 1 | -1.081557  | 5.912537  | 1.596900  |
| 1 | 1.104793   | 5.305281  | 0.491364  |
| 1 | 1.842534   | 5.123418  | 2.072942  |
| 1 | -1.127474  | -3.121101 | 5.226310  |
| 1 | -0.409853  | -1.501205 | 5.213492  |
| 1 | -2.073696  | -1.728540 | 5.761093  |
| 1 | -3.049798  | -4.786901 | 2.266859  |

|   |            |           |           |
|---|------------|-----------|-----------|
| 1 | -3.605204  | -5.653051 | 4.431479  |
| 1 | -3.270656  | -4.022946 | 5.234475  |
| 1 | -5.182107  | -4.365421 | -2.850925 |
| 1 | -4.369133  | -4.840649 | -1.358029 |
| 1 | -5.753678  | -3.748861 | -1.298207 |
| 1 | -4.921489  | -3.000880 | -4.567823 |
| 1 | -3.769111  | -2.420267 | -6.585249 |
| 1 | -2.442778  | -1.538701 | -5.648020 |
| 1 | -2.276124  | 3.781824  | -5.501917 |
| 1 | -1.882061  | 2.068679  | -5.694842 |
| 1 | -3.540785  | 2.557469  | -5.351347 |
| 1 | -1.647658  | 5.351291  | -4.078399 |
| 1 | -1.064221  | 5.626043  | -2.447648 |
| 1 | -3.444283  | 5.731023  | -1.624483 |
| 1 | -4.014494  | 5.472796  | -3.261841 |
| 1 | -9.683768  | -4.699002 | -3.484835 |
| 1 | -11.399343 | -4.324190 | -3.249755 |
| 1 | -10.356036 | -3.195054 | -4.136547 |
| 6 | -0.122138  | 0.069825  | -0.327058 |
| 6 | 0.980127   | -0.172066 | 0.652103  |
| 6 | 1.804096   | 0.930841  | 0.972212  |
| 6 | 1.252868   | -1.395195 | 1.313977  |
| 6 | 2.803887   | 0.859894  | 1.938902  |
| 1 | 1.612870   | 1.872999  | 0.471079  |
| 6 | 2.277535   | -1.464167 | 2.269622  |
| 6 | 3.039689   | -0.348702 | 2.599328  |
| 1 | 3.399809   | 1.739690  | 2.164995  |
| 1 | 2.450362   | -2.427485 | 2.740785  |
| 1 | 3.821499   | -0.426421 | 3.350655  |
| 6 | 0.460555   | 0.275860  | -1.686223 |
| 8 | 0.522150   | -0.611148 | -2.520621 |
| 8 | 0.967130   | 1.509531  | -1.903289 |
| 6 | 1.531885   | 1.729886  | -3.211826 |
| 1 | 2.331750   | 1.001067  | -3.384033 |
| 1 | 0.754590   | 1.558636  | -3.962427 |
| 6 | 2.045093   | 3.156086  | -3.248417 |
| 1 | 1.226751   | 3.860800  | -3.073833 |
| 1 | 2.810558   | 3.315607  | -2.481291 |
| 1 | 2.488100   | 3.371303  | -4.227456 |
| 8 | 0.573531   | -2.559613 | 1.120436  |
| 6 | 0.325449   | -2.982528 | -0.224501 |
| 1 | -0.360458  | -2.311830 | -0.743811 |
| 1 | 1.264497   | -3.051181 | -0.784980 |
| 1 | -0.121454  | -3.972653 | -0.144904 |

---

**Conf2**

---

Number of imaginary frequencies: 8    Electronic energy:    HF=-5382.3246545  
Zero-point correction=                    2.260429 (Hartree/Particle)  
Thermal correction to Energy=            2.396879



|                                              |              |
|----------------------------------------------|--------------|
| Thermal correction to Enthalpy=              | 2.397823     |
| Thermal correction to Gibbs Free Energy=     | 2.038162     |
| Sum of electronic and zero-point Energies=   | -5380.064225 |
| Sum of electronic and thermal Energies=      | -5379.927775 |
| Sum of electronic and thermal Enthalpies=    | -5379.926831 |
| Sum of electronic and thermal Free Energies= | -5380.286492 |

.....  
 Cartesian Coordinates  
 .....

|   |           |           |           |
|---|-----------|-----------|-----------|
| 6 | 2.179310  | 6.821458  | -3.591402 |
| 6 | 0.984254  | 7.219859  | -4.465936 |
| 6 | 0.267669  | 6.045898  | -5.163450 |
| 6 | -1.014440 | 6.533426  | -5.854884 |
| 6 | 1.174335  | 5.320445  | -6.170041 |
| 6 | 7.077798  | -3.210682 | -3.976103 |
| 6 | 7.985748  | -2.092028 | -3.484581 |
| 8 | 9.198731  | -2.216970 | -3.356149 |
| 6 | 7.160073  | -4.512243 | -3.135238 |
| 6 | 8.489762  | -5.256289 | -3.329253 |
| 6 | 6.875602  | -4.248453 | -1.649018 |
| 7 | 7.349900  | -0.913742 | -3.163743 |
| 6 | 8.108870  | 0.266435  | -2.763262 |
| 6 | 8.483905  | 0.291470  | -1.266202 |
| 8 | 9.344821  | 1.064992  | -0.864630 |
| 6 | 7.356309  | 1.550606  | -3.127538 |
| 7 | 7.775847  | -0.553845 | -0.469474 |
| 6 | 7.964624  | -0.634000 | 0.965632  |
| 6 | 6.825587  | 0.026856  | 1.777119  |
| 6 | 6.722152  | 1.520847  | 1.560181  |
| 6 | 5.798173  | 2.058909  | 0.654781  |
| 6 | 7.583835  | 2.398948  | 2.233906  |
| 6 | 5.750097  | 3.435109  | 0.415749  |
| 6 | 7.531932  | 3.774294  | 2.005716  |
| 6 | 6.615713  | 4.297377  | 1.090536  |
| 6 | 1.390584  | -2.970168 | -4.381773 |
| 6 | 1.082346  | -4.158174 | -3.476639 |
| 8 | 1.911360  | -4.626570 | -2.683919 |
| 6 | 2.802901  | -3.042547 | -4.969594 |
| 7 | -0.169591 | -4.647534 | -3.607869 |
| 6 | -0.693243 | -5.629675 | -2.682875 |
| 6 | 1.432081  | -7.318037 | 1.860893  |
| 6 | 1.840675  | -6.222454 | 0.869629  |
| 8 | 1.500873  | -6.679430 | -0.435376 |
| 6 | 3.334758  | -5.893218 | 0.964487  |
| 6 | 3.868753  | -2.992413 | 6.875265  |
| 6 | 3.645538  | -4.511800 | 6.884448  |
| 6 | 3.182467  | -5.013199 | 5.508437  |
| 6 | 4.909586  | -5.251422 | 7.347076  |
| 6 | 6.073547  | 4.417839  | 6.462757  |
| 6 | 4.767806  | 3.690422  | 6.161560  |

|    |           |           |           |
|----|-----------|-----------|-----------|
| 8  | 4.041015  | 3.646323  | 7.393959  |
| 6  | 4.995560  | 2.285124  | 5.601421  |
| 6  | -3.422770 | 0.479569  | 5.828866  |
| 6  | -4.620345 | 1.366747  | 5.439844  |
| 6  | -5.908675 | 0.582383  | 5.293603  |
| 6  | -6.740207 | 0.358828  | 6.400670  |
| 6  | -6.278478 | 0.037324  | 4.055047  |
| 6  | -7.911001 | -0.392370 | 6.281858  |
| 6  | -7.449295 | -0.714656 | 3.935671  |
| 6  | -8.269254 | -0.933560 | 5.044976  |
| 6  | -5.563436 | -0.393520 | -2.061453 |
| 6  | -6.640400 | -1.462636 | -2.130193 |
| 8  | -7.405805 | -1.575669 | -3.091651 |
| 6  | -5.587163 | 0.544166  | -0.824280 |
| 16 | -4.513125 | 0.036045  | 0.584204  |
| 7  | -6.701987 | -2.326858 | -1.071419 |
| 6  | -7.762252 | -3.325404 | -1.011715 |
| 6  | -7.487052 | -4.560398 | -1.884785 |
| 6  | -8.663464 | -5.551502 | -1.970758 |
| 6  | -8.375151 | -6.639018 | -3.017100 |
| 6  | -9.001990 | -6.188851 | -0.613171 |
| 26 | -1.937134 | 0.661019  | -0.005562 |
| 6  | -3.220433 | 3.783158  | -0.401765 |
| 6  | -1.128414 | 1.354186  | 3.202466  |
| 6  | -2.078769 | -2.648692 | 0.700409  |
| 6  | -2.317169 | 0.037390  | -3.307161 |
| 7  | -2.133311 | 2.273007  | 1.174484  |
| 6  | -2.751961 | 3.447006  | 0.864796  |
| 6  | -2.760777 | 4.338852  | 2.020377  |
| 6  | -2.089632 | 3.681660  | 3.016756  |
| 6  | -1.724067 | 2.377915  | 2.474145  |
| 6  | -1.790897 | 4.153223  | 4.408885  |
| 6  | -3.370396 | 5.712837  | 2.050325  |
| 6  | -2.447747 | 6.823458  | 1.502994  |
| 6  | -3.111379 | 8.204410  | 1.509512  |
| 7  | -1.561229 | -0.453281 | 1.614303  |
| 6  | -1.097100 | 0.011175  | 2.815554  |
| 6  | -0.759694 | -1.093050 | 3.689426  |
| 6  | -1.126128 | -2.246152 | 3.019493  |
| 6  | -1.620567 | -1.814401 | 1.716990  |
| 6  | -0.110165 | -0.969506 | 5.034164  |
| 6  | -1.008728 | -3.638177 | 3.427052  |
| 6  | -0.894111 | -4.128071 | 4.675335  |
| 7  | -2.025807 | -1.011565 | -1.126063 |
| 6  | -2.305300 | -2.255341 | -0.615691 |
| 6  | -2.786858 | -3.128067 | -1.659440 |
| 6  | -2.650217 | -2.432238 | -2.847021 |
| 6  | -2.218658 | -1.082214 | -2.470201 |
| 6  | -3.464062 | -4.441186 | -1.403160 |
| 6  | -2.990112 | -2.943335 | -4.167749 |

|   |           |           |           |
|---|-----------|-----------|-----------|
| 6 | -2.471778 | -2.588563 | -5.360744 |
| 7 | -2.584729 | 1.730109  | -1.557274 |
| 6 | -2.552535 | 1.334687  | -2.866703 |
| 6 | -3.004876 | 2.419499  | -3.730703 |
| 6 | -3.354028 | 3.451868  | -2.904246 |
| 6 | -3.067174 | 3.004135  | -1.544291 |
| 6 | -3.101985 | 2.338707  | -5.225053 |
| 6 | -3.955082 | 4.779486  | -3.269545 |
| 6 | -5.491208 | 4.826648  | -3.118449 |
| 6 | -6.083009 | 6.192560  | -3.480280 |
| 1 | 8.916624  | -0.142639 | 1.182225  |
| 1 | 8.050214  | -1.688701 | 1.256017  |
| 1 | 7.370856  | -3.435995 | -5.009845 |
| 1 | 6.033960  | -2.872657 | -4.007919 |
| 1 | 4.161598  | -2.624671 | 7.866483  |
| 1 | 4.664760  | -2.719279 | 6.169771  |
| 1 | 2.960556  | -2.457904 | 6.572213  |
| 1 | 6.666683  | 4.537780  | 5.549586  |
| 1 | 5.869846  | 5.408327  | 6.882636  |
| 1 | 6.663200  | 3.851146  | 7.192866  |
| 1 | 2.594365  | 7.693945  | -3.072946 |
| 1 | 1.878168  | 6.093414  | -2.827479 |
| 1 | 2.989831  | 6.376499  | -4.180347 |
| 1 | 1.626862  | -7.000314 | 2.891177  |
| 1 | 0.365526  | -7.543908 | 1.758052  |
| 1 | 1.996299  | -8.237131 | 1.662090  |
| 1 | -2.517025 | 1.081931  | 5.962782  |
| 1 | -3.620467 | -0.051943 | 6.768545  |
| 1 | -3.223720 | -0.264005 | 5.051869  |
| 1 | -1.690034 | -5.924453 | -3.012063 |
| 1 | -0.050335 | -6.513755 | -2.663321 |
| 1 | -0.747596 | -5.239006 | -1.662582 |
| 1 | 1.292903  | -2.068133 | -3.764575 |
| 1 | 0.642874  | -2.895948 | -5.179202 |
| 1 | -5.696271 | 0.193665  | -2.977430 |
| 1 | -4.590050 | -0.875587 | -2.123661 |
| 1 | -8.696587 | -2.858561 | -1.348001 |
| 1 | -7.887001 | -3.610608 | 0.038676  |
| 1 | -7.173575 | 6.198105  | -3.367520 |
| 1 | -5.677546 | 6.984410  | -2.837189 |
| 1 | -5.853735 | 6.463246  | -4.519225 |
| 1 | -2.435435 | 8.976171  | 1.122054  |
| 1 | -4.016490 | 8.212126  | 0.888938  |
| 1 | -3.406993 | 8.498931  | 2.524781  |
| 1 | 1.310878  | 7.943318  | -5.229149 |
| 1 | 0.252216  | 7.748102  | -3.839533 |
| 1 | -0.024527 | 5.324044  | -4.386189 |
| 1 | -1.552008 | 5.701890  | -6.326132 |
| 1 | -1.696051 | 7.009089  | -5.139868 |
| 1 | -0.784243 | 7.268316  | -6.638730 |

|   |           |           |           |
|---|-----------|-----------|-----------|
| 1 | 0.641228  | 4.490634  | -6.649149 |
| 1 | 1.505986  | 6.005553  | -6.962713 |
| 1 | 2.069997  | 4.904622  | -5.694830 |
| 1 | 6.355762  | -5.157263 | -3.515670 |
| 1 | 8.487129  | -6.195999 | -2.763604 |
| 1 | 8.651793  | -5.501792 | -4.386160 |
| 1 | 9.333285  | -4.646114 | -2.996117 |
| 1 | 6.843736  | -5.188271 | -1.086702 |
| 1 | 7.659109  | -3.622408 | -1.203539 |
| 1 | 5.907194  | -3.751564 | -1.506577 |
| 1 | 6.375385  | -0.801852 | -3.408472 |
| 1 | 9.067099  | 0.236959  | -3.290129 |
| 1 | 7.940076  | 2.414170  | -2.800430 |
| 1 | 7.198808  | 1.616062  | -4.209825 |
| 1 | 6.382880  | 1.595414  | -2.623163 |
| 1 | 7.111729  | -1.170328 | -0.916062 |
| 1 | 7.009762  | -0.188335 | 2.838200  |
| 1 | 5.874787  | -0.456663 | 1.519532  |
| 1 | 5.105516  | 1.397578  | 0.138869  |
| 1 | 8.309092  | 1.998403  | 2.939352  |
| 1 | 5.030374  | 3.833183  | -0.294700 |
| 1 | 8.210996  | 4.436147  | 2.537401  |
| 1 | 6.574930  | 5.367883  | 0.907333  |
| 1 | 3.051621  | -2.119635 | -5.505572 |
| 1 | 3.530836  | -3.195394 | -4.167472 |
| 1 | 2.900154  | -3.879334 | -5.671151 |
| 1 | -0.838076 | -4.113859 | -4.152355 |
| 1 | 1.267055  | -5.310016 | 1.112027  |
| 1 | 1.699405  | -5.975464 | -1.085922 |
| 1 | 3.606797  | -5.122068 | 0.233174  |
| 1 | 3.601919  | -5.524556 | 1.962812  |
| 1 | 3.931347  | -6.787930 | 0.749024  |
| 1 | 2.845256  | -4.729603 | 7.607965  |
| 1 | 3.010919  | -6.096831 | 5.517995  |
| 1 | 2.249843  | -4.529388 | 5.195044  |
| 1 | 3.941266  | -4.804406 | 4.742075  |
| 1 | 4.744995  | -6.335054 | 7.390811  |
| 1 | 5.742990  | -5.069903 | 6.655151  |
| 1 | 5.226542  | -4.918621 | 8.343314  |
| 1 | 4.201583  | 4.278570  | 5.419290  |
| 1 | 3.215101  | 3.165702  | 7.227345  |
| 1 | 4.040237  | 1.782042  | 5.402634  |
| 1 | 5.551700  | 2.319536  | 4.657544  |
| 1 | 5.557247  | 1.677538  | 6.320938  |
| 1 | -4.391584 | 1.874522  | 4.495835  |
| 1 | -4.752186 | 2.147836  | 6.201805  |
| 1 | -6.468010 | 0.782780  | 7.366475  |
| 1 | -5.659556 | 0.201337  | 3.172317  |
| 1 | -8.544325 | -0.550463 | 7.152437  |
| 1 | -7.716513 | -1.124537 | 2.964792  |

|   |           |           |           |
|---|-----------|-----------|-----------|
| 1 | -9.182151 | -1.516911 | 4.946940  |
| 1 | -6.616822 | 0.646471  | -0.456849 |
| 1 | -5.278902 | 1.539040  | -1.157666 |
| 1 | -6.124323 | -2.115202 | -0.259640 |
| 1 | -6.595374 | -5.084054 | -1.510407 |
| 1 | -7.251107 | -4.196207 | -2.890652 |
| 1 | -9.546936 | -4.988206 | -2.309564 |
| 1 | -9.833847 | -6.898523 | -0.706779 |
| 1 | -8.138830 | -6.739949 | -0.215711 |
| 1 | -9.289934 | -5.440418 | 0.133154  |
| 1 | -3.662412 | 4.765969  | -0.524788 |
| 1 | -0.797707 | 1.589074  | 4.208349  |
| 1 | -2.246716 | -3.692445 | 0.942152  |
| 1 | -2.450287 | -0.143499 | -4.365993 |
| 1 | -2.190360 | 3.467938  | 5.167207  |
| 1 | -0.709811 | 4.235563  | 4.587830  |
| 1 | -2.226425 | 5.140087  | 4.596499  |
| 1 | -3.654661 | 5.968657  | 3.080080  |
| 1 | -4.306520 | 5.714766  | 1.475049  |
| 1 | -2.136871 | 6.561832  | 0.483681  |
| 1 | -1.528478 | 6.849988  | 2.103142  |
| 1 | 0.606107  | -1.785284 | 5.191832  |
| 1 | 0.433897  | -0.023815 | 5.129736  |
| 1 | -0.835545 | -1.015061 | 5.858210  |
| 1 | -1.019415 | -4.362312 | 2.612514  |
| 1 | -0.804875 | -5.197913 | 4.842422  |
| 1 | -0.921258 | -3.500187 | 5.559614  |
| 1 | -3.679638 | -4.985659 | -2.326620 |
| 1 | -2.876202 | -5.104180 | -0.758340 |
| 1 | -4.421756 | -4.263075 | -0.899271 |
| 1 | -3.735631 | -3.739458 | -4.172959 |
| 1 | -2.823296 | -3.050526 | -6.279081 |
| 1 | -1.709500 | -1.821409 | -5.462230 |
| 1 | -3.363813 | 3.308670  | -5.660632 |
| 1 | -2.154083 | 2.017756  | -5.676578 |
| 1 | -3.868404 | 1.619649  | -5.544889 |
| 1 | -3.696637 | 5.030039  | -4.307349 |
| 1 | -3.513117 | 5.573774  | -2.651502 |
| 1 | -5.759211 | 4.564839  | -2.087135 |
| 1 | -5.933927 | 4.047405  | -3.752197 |
| 1 | -7.496323 | -7.233121 | -2.732053 |
| 1 | -9.222032 | -7.329351 | -3.121427 |
| 1 | -8.174184 | -6.199135 | -4.001125 |
| 6 | -0.200667 | 1.061012  | -0.440412 |
| 6 | 0.883590  | 0.169064  | -0.882764 |
| 6 | 1.015627  | -1.120074 | -0.332898 |
| 6 | 1.900525  | 0.576469  | -1.801290 |
| 6 | 2.106294  | -1.942850 | -0.607302 |
| 1 | 0.258996  | -1.454436 | 0.358715  |
| 6 | 2.992134  | -0.249036 | -2.087557 |

|   |           |           |           |
|---|-----------|-----------|-----------|
| 6 | 3.097160  | -1.504938 | -1.480743 |
| 1 | 2.170123  | -2.926498 | -0.154338 |
| 1 | 3.749440  | 0.074515  | -2.794023 |
| 1 | 3.940066  | -2.149266 | -1.717879 |
| 6 | 0.251242  | 2.495059  | -0.344923 |
| 8 | -0.172185 | 3.460582  | -0.942930 |
| 8 | 1.270088  | 2.576044  | 0.568305  |
| 6 | 1.886614  | 3.864243  | 0.746242  |
| 1 | 2.935750  | 3.641517  | 0.960097  |
| 1 | 1.815575  | 4.421391  | -0.192383 |
| 6 | 1.256211  | 4.646744  | 1.888490  |
| 1 | 0.207116  | 4.864917  | 1.675041  |
| 1 | 1.307482  | 4.075588  | 2.821336  |
| 1 | 1.792250  | 5.593816  | 2.031773  |
| 8 | 1.722236  | 1.789705  | -2.390283 |
| 6 | 2.706824  | 2.294836  | -3.268045 |
| 1 | 3.683987  | 2.390070  | -2.773043 |
| 1 | 2.816656  | 1.661971  | -4.159572 |
| 1 | 2.355259  | 3.283306  | -3.568540 |

---

**Conf3**

---

Number of imaginary frequencies: 13    Electronic energy:    HF=-5382.30501543  
Zero-point correction=                    2.260410 (Hartree/Particle)  
Thermal correction to Energy=            2.392461  
Thermal correction to Enthalpy=         2.393405  
Thermal correction to Gibbs Free Energy= 2.053764  
Sum of electronic and zero-point Energies= -5380.044605  
Sum of electronic and thermal Energies= -5379.912554  
Sum of electronic and thermal Enthalpies= -5379.911610  
Sum of electronic and thermal Free Energies= -5380.251251

---

Cartesian Coordinates

---

|   |          |           |           |
|---|----------|-----------|-----------|
| 6 | 3.374570 | 7.318053  | -2.878258 |
| 6 | 2.390751 | 8.329666  | -2.279199 |
| 6 | 2.523847 | 9.767644  | -2.819898 |
| 6 | 1.376566 | 10.646952 | -2.299510 |
| 6 | 3.883135 | 10.398908 | -2.480500 |
| 6 | 6.090513 | -3.334378 | -4.858980 |
| 6 | 7.234917 | -2.487488 | -4.321369 |
| 8 | 8.409127 | -2.839158 | -4.366699 |
| 6 | 5.996925 | -4.748983 | -4.225976 |
| 6 | 7.127336 | -5.676563 | -4.696287 |
| 6 | 5.925320 | -4.688396 | -2.692166 |
| 7 | 6.860509 | -1.293796 | -3.749020 |
| 6 | 7.840674 | -0.345968 | -3.235684 |
| 6 | 8.182992 | -0.533320 | -1.741842 |
| 8 | 9.092884 | 0.117819  | -1.237867 |
| 6 | 7.392094 | 1.099165  | -3.481420 |

|    |            |           |           |
|----|------------|-----------|-----------|
| 7  | 7.413549   | -1.427809 | -1.070198 |
| 6  | 7.586147   | -1.722601 | 0.338585  |
| 6  | 6.398194   | -1.277543 | 1.210261  |
| 6  | 6.126795   | 0.215398  | 1.247160  |
| 6  | 4.848082   | 0.709560  | 0.959843  |
| 6  | 7.124215   | 1.129414  | 1.622304  |
| 6  | 4.557508   | 2.072397  | 1.068546  |
| 6  | 6.845068   | 2.493968  | 1.713130  |
| 6  | 5.558042   | 2.970065  | 1.443466  |
| 6  | 0.570842   | -1.898916 | -4.953549 |
| 6  | -0.227132  | -3.180549 | -4.814420 |
| 8  | -0.088585  | -4.128018 | -5.588022 |
| 6  | 0.356540   | -1.266801 | -6.337787 |
| 7  | -1.095819  | -3.190528 | -3.769721 |
| 6  | -1.984531  | -4.299001 | -3.533249 |
| 6  | -0.165246  | -7.012578 | 0.630908  |
| 6  | 0.848523   | -5.909181 | 0.312593  |
| 8  | 1.009618   | -5.746807 | -1.102699 |
| 6  | 2.236237   | -6.224878 | 0.861392  |
| 6  | 3.206982   | -4.028025 | 6.063195  |
| 6  | 2.716876   | -5.255100 | 6.846872  |
| 6  | 1.710792   | -6.071491 | 6.022307  |
| 6  | 3.896932   | -6.126671 | 7.301330  |
| 6  | 6.883542   | 2.767806  | 6.556224  |
| 6  | 5.622466   | 1.931981  | 6.360792  |
| 8  | 5.115450   | 1.658643  | 7.672846  |
| 6  | 5.889913   | 0.637435  | 5.590202  |
| 6  | -3.230808  | 0.953675  | 5.851279  |
| 6  | -3.801002  | 2.326295  | 5.446617  |
| 6  | -5.298693  | 2.289212  | 5.217215  |
| 6  | -6.190758  | 2.609350  | 6.250537  |
| 6  | -5.822136  | 1.899149  | 3.975286  |
| 6  | -7.572046  | 2.541324  | 6.055977  |
| 6  | -7.202999  | 1.829332  | 3.779921  |
| 6  | -8.083016  | 2.149166  | 4.816851  |
| 6  | -5.657793  | 1.666469  | -1.971975 |
| 6  | -7.025046  | 0.998116  | -1.979721 |
| 8  | -7.961352  | 1.429299  | -2.659631 |
| 6  | -5.057865  | 2.133719  | -0.621764 |
| 16 | -4.369379  | 0.853772  | 0.522264  |
| 7  | -7.138494  | -0.145412 | -1.246644 |
| 6  | -8.393159  | -0.881982 | -1.225661 |
| 6  | -8.610943  | -1.738134 | -2.484245 |
| 6  | -9.989808  | -2.421054 | -2.560328 |
| 6  | -10.191730 | -3.074950 | -3.935981 |
| 6  | -10.203288 | -3.451481 | -1.439350 |
| 26 | -1.870391  | 0.226821  | 0.088558  |
| 6  | -1.000794  | 3.513392  | -0.206689 |
| 6  | -1.203233  | 0.354357  | 3.431210  |
| 6  | -3.355244  | -2.814774 | 0.498530  |

|   |           |           |           |
|---|-----------|-----------|-----------|
| 6 | -2.664088 | 0.164960  | -3.249707 |
| 7 | -1.292658 | 1.676892  | 1.380890  |
| 6 | -0.949024 | 2.958518  | 1.066487  |
| 6 | -0.461866 | 3.665569  | 2.246203  |
| 6 | -0.482885 | 2.759463  | 3.268813  |
| 6 | -1.021863 | 1.525740  | 2.710444  |
| 6 | -0.019886 | 2.944343  | 4.683120  |
| 6 | 0.022981  | 5.088005  | 2.272782  |
| 6 | 1.494089  | 5.254984  | 1.834184  |
| 6 | 1.966475  | 6.711969  | 1.874061  |
| 7 | -2.206652 | -1.008697 | 1.669817  |
| 6 | -1.786351 | -0.820664 | 2.956914  |
| 6 | -2.034142 | -2.004801 | 3.756929  |
| 6 | -2.655747 | -2.910419 | 2.921585  |
| 6 | -2.744366 | -2.260561 | 1.618097  |
| 6 | -1.640119 | -2.198761 | 5.190083  |
| 6 | -3.106856 | -4.268395 | 3.190764  |
| 6 | -3.425953 | -4.813845 | 4.378030  |
| 7 | -2.733521 | -1.126231 | -1.175883 |
| 6 | -3.425281 | -2.237006 | -0.764687 |
| 6 | -4.270929 | -2.733132 | -1.827853 |
| 6 | -4.044874 | -1.927393 | -2.919663 |
| 6 | -3.077387 | -0.922607 | -2.481197 |
| 6 | -5.176540 | -3.923606 | -1.725859 |
| 6 | -4.699386 | -2.044506 | -4.223885 |
| 6 | -4.149785 | -1.867242 | -5.435364 |
| 7 | -1.744118 | 1.538900  | -1.444759 |
| 6 | -2.047391 | 1.307910  | -2.758477 |
| 6 | -1.804108 | 2.497197  | -3.562365 |
| 6 | -1.389340 | 3.468477  | -2.693295 |
| 6 | -1.361150 | 2.847720  | -1.372781 |
| 6 | -2.036879 | 2.596004  | -5.040916 |
| 6 | -1.105505 | 4.915306  | -2.986414 |
| 6 | -2.323205 | 5.837144  | -2.756011 |
| 6 | -2.025694 | 7.309731  | -3.055162 |
| 1 | 8.508593  | -1.222477 | 0.642910  |
| 1 | 7.736721  | -2.802825 | 0.466829  |
| 1 | 6.247094  | -3.441725 | -5.940245 |
| 1 | 5.132303  | -2.817532 | -4.729948 |
| 1 | 3.896416  | -3.419453 | 6.661302  |
| 1 | 3.739489  | -4.337234 | 5.154114  |
| 1 | 2.369276  | -3.388925 | 5.760086  |
| 1 | 7.305246  | 3.060661  | 5.587888  |
| 1 | 6.655907  | 3.673083  | 7.128615  |
| 1 | 7.637974  | 2.194294  | 7.108812  |
| 1 | 3.175892  | 6.309117  | -2.498800 |
| 1 | 3.288933  | 7.283080  | -3.971966 |
| 1 | 4.414973  | 7.559709  | -2.633670 |
| 1 | -0.283668 | -7.139044 | 1.713709  |
| 1 | -1.152301 | -6.768994 | 0.216552  |



|   |           |           |           |
|---|-----------|-----------|-----------|
| 1 | 0.161684  | -7.965295 | 0.197575  |
| 1 | -2.162856 | 1.018287  | 6.079557  |
| 1 | -3.741787 | 0.581335  | 6.749565  |
| 1 | -3.376349 | 0.225215  | 5.052355  |
| 1 | -2.940291 | -4.185543 | -4.055390 |
| 1 | -1.498731 | -5.205835 | -3.905799 |
| 1 | -2.181747 | -4.395154 | -2.462283 |
| 1 | 1.624931  | -2.165625 | -4.844597 |
| 1 | 0.335474  | -1.183231 | -4.161088 |
| 1 | -5.773211 | 2.541604  | -2.623309 |
| 1 | -4.944954 | 0.992932  | -2.457622 |
| 1 | -9.218563 | -0.163775 | -1.141253 |
| 1 | -8.394914 | -1.503727 | -0.323792 |
| 1 | -2.909912 | 7.936723  | -2.890905 |
| 1 | -1.223291 | 7.692588  | -2.410712 |
| 1 | -1.707383 | 7.448461  | -4.096562 |
| 1 | 3.013969  | 6.803222  | 1.562007  |
| 1 | 1.364273  | 7.343285  | 1.207976  |
| 1 | 1.883266  | 7.129214  | 2.885801  |
| 1 | 2.504612  | 8.348575  | -1.184868 |
| 1 | 1.366977  | 7.979664  | -2.471210 |
| 1 | 2.438898  | 9.718302  | -3.917160 |
| 1 | 1.434679  | 11.663084 | -2.708604 |
| 1 | 0.399162  | 10.230072 | -2.570732 |
| 1 | 1.410975  | 10.727421 | -1.204870 |
| 1 | 3.949904  | 11.421406 | -2.871989 |
| 1 | 4.027414  | 10.450097 | -1.392831 |
| 1 | 4.718951  | 9.829409  | -2.901234 |
| 1 | 5.047272  | -5.168533 | -4.586060 |
| 1 | 7.001269  | -6.679263 | -4.269844 |
| 1 | 7.125542  | -5.774638 | -5.788875 |
| 1 | 8.103954  | -5.286278 | -4.397969 |
| 1 | 5.762996  | -5.687798 | -2.273075 |
| 1 | 6.862475  | -4.302496 | -2.271022 |
| 1 | 5.099388  | -4.052979 | -2.348083 |
| 1 | 5.898936  | -0.992402 | -3.829745 |
| 1 | 8.775943  | -0.540320 | -3.768847 |
| 1 | 8.135660  | 1.781461  | -3.063664 |
| 1 | 7.284019  | 1.295795  | -4.553302 |
| 1 | 6.433918  | 1.304154  | -2.986513 |
| 1 | 6.698451  | -1.914843 | -1.591865 |
| 1 | 6.591975  | -1.642264 | 2.230315  |
| 1 | 5.494773  | -1.799266 | 0.871209  |
| 1 | 4.055687  | 0.029152  | 0.662116  |
| 1 | 8.130112  | 0.776295  | 1.835263  |
| 1 | 3.542990  | 2.411324  | 0.878111  |
| 1 | 7.634281  | 3.185482  | 1.999089  |
| 1 | 5.338606  | 4.031469  | 1.529147  |
| 1 | 1.017734  | -0.404255 | -6.480866 |
| 1 | 0.562513  | -2.001992 | -7.121760 |

|   |            |           |           |
|---|------------|-----------|-----------|
| 1 | -0.676688  | -0.920118 | -6.463723 |
| 1 | -1.215802  | -2.352504 | -3.217724 |
| 1 | 0.499579   | -4.962364 | 0.755312  |
| 1 | 0.156774   | -5.476648 | -1.479053 |
| 1 | 2.945677   | -5.444416 | 0.567035  |
| 1 | 2.216249   | -6.282303 | 1.955808  |
| 1 | 2.596305   | -7.181712 | 0.464452  |
| 1 | 2.198478   | -4.893946 | 7.748096  |
| 1 | 1.343148   | -6.938558 | 6.584868  |
| 1 | 0.842401   | -5.465923 | 5.736117  |
| 1 | 2.174692   | -6.446414 | 5.099677  |
| 1 | 3.554991   | -6.985773 | 7.891634  |
| 1 | 4.449993   | -6.516546 | 6.436191  |
| 1 | 4.602594   | -5.555145 | 7.916763  |
| 1 | 4.886996   | 2.531556  | 5.797520  |
| 1 | 4.310090   | 1.127921  | 7.566776  |
| 1 | 4.969636   | 0.046231  | 5.486949  |
| 1 | 6.259373   | 0.847147  | 4.579939  |
| 1 | 6.630524   | 0.026378  | 6.121213  |
| 1 | -3.297223  | 2.664090  | 4.533432  |
| 1 | -3.569806  | 3.059917  | 6.231398  |
| 1 | -5.797527  | 2.919676  | 7.217786  |
| 1 | -5.158118  | 1.652294  | 3.146621  |
| 1 | -8.247069  | 2.798615  | 6.869758  |
| 1 | -7.583489  | 1.526371  | 2.807755  |
| 1 | -9.158143  | 2.097774  | 4.659845  |
| 1 | -5.819373  | 2.696121  | -0.066433 |
| 1 | -4.257163  | 2.842455  | -0.858680 |
| 1 | -6.373897  | -0.373186 | -0.610639 |
| 1 | -7.820611  | -2.500460 | -2.546639 |
| 1 | -8.491178  | -1.075000 | -3.348285 |
| 1 | -10.754543 | -1.636636 | -2.448233 |
| 1 | -11.187233 | -3.929981 | -1.524936 |
| 1 | -9.443808  | -4.243709 | -1.489418 |
| 1 | -10.143345 | -2.996642 | -0.444580 |
| 1 | -0.721820  | 4.557664  | -0.300109 |
| 1 | -0.886162  | 0.366644  | 4.465662  |
| 1 | -3.886113  | -3.750841 | 0.635507  |
| 1 | -2.972513  | 0.179896  | -4.287462 |
| 1 | -0.821961  | 2.770546  | 5.410906  |
| 1 | 0.796393   | 2.251981  | 4.929798  |
| 1 | 0.355323   | 3.959641  | 4.847183  |
| 1 | -0.087968  | 5.495574  | 3.286599  |
| 1 | -0.611892  | 5.715003  | 1.631147  |
| 1 | 1.611950   | 4.851423  | 0.820113  |
| 1 | 2.129735   | 4.637166  | 2.481936  |
| 1 | -1.347116  | -3.240857 | 5.369799  |
| 1 | -0.797095  | -1.557718 | 5.470491  |
| 1 | -2.459982  | -1.972279 | 5.885913  |
| 1 | -3.189001  | -4.911772 | 2.314531  |

|   |            |           |           |
|---|------------|-----------|-----------|
| 1 | -3.734488  | -5.853728 | 4.444306  |
| 1 | -3.423310  | -4.250015 | 5.304899  |
| 1 | -5.766381  | -4.054771 | -2.637785 |
| 1 | -4.612013  | -4.854649 | -1.571374 |
| 1 | -5.874539  | -3.830442 | -0.884910 |
| 1 | -5.751588  | -2.328782 | -4.185611 |
| 1 | -4.743455  | -1.979878 | -6.338324 |
| 1 | -3.098685  | -1.630698 | -5.570449 |
| 1 | -1.673657  | 3.549285  | -5.438998 |
| 1 | -1.526192  | 1.792892  | -5.587670 |
| 1 | -3.104068  | 2.523666  | -5.290534 |
| 1 | -0.776015  | 5.023493  | -4.028965 |
| 1 | -0.269081  | 5.275919  | -2.370171 |
| 1 | -2.663447  | 5.727276  | -1.718752 |
| 1 | -3.152575  | 5.489188  | -3.385012 |
| 1 | -9.449453  | -3.866715 | -4.105784 |
| 1 | -11.186823 | -3.530167 | -4.021435 |
| 1 | -10.084904 | -2.341055 | -4.743491 |
| 6 | -0.157318  | -0.363755 | -0.035594 |
| 6 | 0.780568   | -0.764064 | -1.133930 |
| 6 | 1.019362   | -2.131978 | -1.340253 |
| 6 | 1.662132   | 0.165589  | -1.740327 |
| 6 | 2.111274   | -2.589092 | -2.080357 |
| 1 | 0.364060   | -2.849444 | -0.859324 |
| 6 | 2.753292   | -0.289375 | -2.491576 |
| 6 | 2.984578   | -1.659946 | -2.637795 |
| 1 | 2.261742   | -3.658247 | -2.194712 |
| 1 | 3.436202   | 0.424244  | -2.939695 |
| 1 | 3.846060   | -1.998405 | -3.206856 |
| 6 | 0.715346   | -0.587248 | 1.178390  |
| 8 | 1.473567   | 0.250441  | 1.629748  |
| 8 | 0.641446   | -1.857651 | 1.638889  |
| 6 | 1.434805   | -2.180974 | 2.801930  |
| 1 | 1.352116   | -1.360754 | 3.520236  |
| 1 | 0.944709   | -3.066544 | 3.213499  |
| 6 | 2.889845   | -2.456621 | 2.452968  |
| 1 | 2.963935   | -3.188243 | 1.641212  |
| 1 | 3.388378   | -1.534204 | 2.149378  |
| 1 | 3.411741   | -2.858681 | 3.329145  |
| 8 | 1.416584   | 1.478836  | -1.489539 |
| 6 | 2.239246   | 2.454860  | -2.099936 |
| 1 | 3.278790   | 2.382475  | -1.752334 |
| 1 | 2.212176   | 2.377205  | -3.195366 |
| 1 | 1.821841   | 3.416782  | -1.798660 |

---

**Conf4**

---

|                                    |                             |                   |
|------------------------------------|-----------------------------|-------------------|
| Number of imaginary frequencies:10 | Electronic energy:          | HF=-5382.32543821 |
| Zero-point correction=             | 2.260978 (Hartree/Particle) |                   |
| Thermal correction to Energy=      | 2.395718                    |                   |

|                                              |              |
|----------------------------------------------|--------------|
| Thermal correction to Enthalpy=              | 2.396662     |
| Thermal correction to Gibbs Free Energy=     | 2.044978     |
| Sum of electronic and zero-point Energies=   | -5380.064460 |
| Sum of electronic and thermal Energies=      | -5379.929721 |
| Sum of electronic and thermal Enthalpies=    | -5379.928776 |
| Sum of electronic and thermal Free Energies= | -5380.280461 |

.....  
 Cartesian Coordinates  
 .....

|   |           |           |           |
|---|-----------|-----------|-----------|
| 6 | 2.487692  | 7.040085  | -3.236384 |
| 6 | 1.572806  | 8.022221  | -2.495022 |
| 6 | 2.195083  | 9.402932  | -2.204589 |
| 6 | 1.137329  | 10.363839 | -1.640738 |
| 6 | 3.402192  | 9.315796  | -1.257840 |
| 6 | 6.493586  | -3.282479 | -4.710060 |
| 6 | 7.534315  | -2.259586 | -4.277816 |
| 8 | 8.742360  | -2.445843 | -4.388236 |
| 6 | 6.642232  | -4.667195 | -4.025495 |
| 6 | 7.872300  | -5.441126 | -4.522623 |
| 6 | 6.632711  | -4.548734 | -2.494044 |
| 7 | 7.025280  | -1.106949 | -3.727009 |
| 6 | 7.883484  | -0.009157 | -3.301999 |
| 6 | 8.207653  | -0.008272 | -1.790894 |
| 8 | 8.992031  | 0.818778  | -1.335359 |
| 6 | 7.301232  | 1.348270  | -3.712752 |
| 7 | 7.578367  | -0.958359 | -1.050755 |
| 6 | 7.881460  | -1.198921 | 0.347921  |
| 6 | 6.681309  | -1.056488 | 1.296865  |
| 6 | 6.102068  | 0.338036  | 1.450805  |
| 6 | 4.713169  | 0.517486  | 1.467370  |
| 6 | 6.922703  | 1.461398  | 1.638386  |
| 6 | 4.148936  | 1.777314  | 1.679203  |
| 6 | 6.364934  | 2.722874  | 1.851297  |
| 6 | 4.976477  | 2.884240  | 1.879476  |
| 6 | 0.835292  | -2.560324 | -4.726256 |
| 6 | 0.472821  | -3.798580 | -3.919289 |
| 8 | 1.308070  | -4.424366 | -3.257835 |
| 6 | 2.099377  | -2.772059 | -5.567964 |
| 7 | -0.831148 | -4.157696 | -3.980901 |
| 6 | -1.363267 | -5.177085 | -3.106383 |
| 6 | 0.873874  | -7.396129 | 1.146411  |
| 6 | 1.681420  | -6.097560 | 1.044517  |
| 8 | 2.408512  | -6.020759 | -0.187426 |
| 6 | 2.717349  | -5.985401 | 2.159208  |
| 6 | 3.953082  | -3.703288 | 6.310714  |
| 6 | 3.762464  | -4.843485 | 7.321218  |
| 6 | 2.665110  | -5.813282 | 6.859311  |
| 6 | 5.083842  | -5.584360 | 7.573805  |
| 6 | 6.745288  | 3.517989  | 6.328906  |
| 6 | 5.555847  | 2.625902  | 5.990621  |

|    |           |           |           |
|----|-----------|-----------|-----------|
| 8  | 4.674124  | 2.691327  | 7.117960  |
| 6  | 5.969397  | 1.183515  | 5.693569  |
| 6  | -3.068869 | 0.408622  | 6.009955  |
| 6  | -4.108200 | 1.485487  | 5.646912  |
| 6  | -5.508090 | 0.923043  | 5.503726  |
| 6  | -6.357494 | 0.824996  | 6.615330  |
| 6  | -5.969384 | 0.458247  | 4.263217  |
| 6  | -7.635217 | 0.274557  | 6.498451  |
| 6  | -7.247279 | -0.092764 | 4.145347  |
| 6  | -8.084468 | -0.187851 | 5.259351  |
| 6  | -5.731498 | 0.359012  | -1.768826 |
| 6  | -6.966475 | -0.526390 | -1.774793 |
| 8  | -7.923737 | -0.333799 | -2.528880 |
| 6  | -5.454092 | 1.149021  | -0.463400 |
| 16 | -4.328590 | 0.307794  | 0.724215  |
| 7  | -6.943769 | -1.590982 | -0.914864 |
| 6  | -8.104327 | -2.466111 | -0.807876 |
| 6  | -8.214798 | -3.471001 | -1.966046 |
| 6  | -9.511422 | -4.302974 | -1.961393 |
| 6  | -9.629082 | -5.122784 | -3.255519 |
| 6  | -9.623427 | -5.220336 | -0.732662 |
| 26 | -1.902282 | 0.486909  | -0.167976 |
| 6  | -2.348995 | 3.859974  | -0.361252 |
| 6  | -0.794919 | 0.790523  | 3.029004  |
| 6  | -2.468838 | -2.826413 | 0.336906  |
| 6  | -2.793955 | 0.174897  | -3.444212 |
| 7  | -1.657957 | 2.027456  | 1.098511  |
| 6  | -1.934755 | 3.338480  | 0.862146  |
| 6  | -1.656704 | 4.142697  | 2.049580  |
| 6  | -1.142668 | 3.281227  | 2.980018  |
| 6  | -1.163743 | 1.955925  | 2.370529  |
| 6  | -0.676590 | 3.581596  | 4.374158  |
| 6  | -1.930583 | 5.615754  | 2.190034  |
| 6  | -0.820831 | 6.545146  | 1.655066  |
| 6  | -1.163459 | 8.029635  | 1.817768  |
| 7  | -1.549930 | -0.812019 | 1.350333  |
| 6  | -1.012102 | -0.510041 | 2.570895  |
| 6  | -0.845100 | -1.708808 | 3.367736  |
| 6  | -1.378001 | -2.744154 | 2.622738  |
| 6  | -1.823598 | -2.147916 | 1.366188  |
| 6  | -0.252083 | -1.776237 | 4.741585  |
| 6  | -1.543907 | -4.147724 | 2.967642  |
| 6  | -0.878810 | -4.864094 | 3.893608  |
| 7  | -2.441232 | -1.052985 | -1.361803 |
| 6  | -2.793478 | -2.298325 | -0.908929 |
| 6  | -3.482584 | -3.029706 | -1.946750 |
| 6  | -3.405194 | -2.256786 | -3.089929 |
| 6  | -2.782409 | -0.996396 | -2.679413 |
| 6  | -4.216982 | -4.319612 | -1.731372 |
| 6  | -3.890507 | -2.644046 | -4.407916 |

|   |           |           |           |
|---|-----------|-----------|-----------|
| 6 | -3.429346 | -2.256037 | -5.613152 |
| 7 | -2.407594 | 1.776279  | -1.632695 |
| 6 | -2.668452 | 1.463151  | -2.937777 |
| 6 | -2.929544 | 2.670468  | -3.711524 |
| 6 | -2.855690 | 3.715186  | -2.832073 |
| 6 | -2.524634 | 3.132807  | -1.534403 |
| 6 | -3.243479 | 2.697440  | -5.177597 |
| 6 | -3.105581 | 5.173985  | -3.091532 |
| 6 | -4.538454 | 5.629804  | -2.739914 |
| 6 | -4.768926 | 7.122161  | -2.998158 |
| 1 | 8.679708  | -0.501228 | 0.609670  |
| 1 | 8.290104  | -2.213681 | 0.454406  |
| 1 | 6.594503  | -3.409703 | -5.795815 |
| 1 | 5.480885  | -2.901328 | -4.526413 |
| 1 | 4.711516  | -2.988195 | 6.651878  |
| 1 | 4.277002  | -4.093864 | 5.337113  |
| 1 | 3.019100  | -3.151081 | 6.150729  |
| 1 | 7.444612  | 3.563421  | 5.487031  |
| 1 | 6.406504  | 4.533592  | 6.558811  |
| 1 | 7.276028  | 3.127862  | 7.205473  |
| 1 | 1.956869  | 6.108623  | -3.460588 |
| 1 | 2.834302  | 7.464666  | -4.187575 |
| 1 | 3.375168  | 6.780525  | -2.647869 |
| 1 | 0.311297  | -7.430924 | 2.086554  |
| 1 | 0.154469  | -7.474233 | 0.321445  |
| 1 | 1.539855  | -8.265956 | 1.098524  |
| 1 | -2.075153 | 0.853495  | 6.143396  |
| 1 | -3.340110 | -0.100819 | 6.942902  |
| 1 | -2.999973 | -0.344471 | 5.219084  |
| 1 | -2.361863 | -5.454169 | -3.446088 |
| 1 | -0.716951 | -6.059171 | -3.145327 |
| 1 | -1.418120 | -4.832190 | -2.068369 |
| 1 | 1.009473  | -1.758230 | -3.999456 |
| 1 | -0.002628 | -2.245636 | -5.359318 |
| 1 | -5.886332 | 1.059230  | -2.597572 |
| 1 | -4.864408 | -0.248196 | -2.007887 |
| 1 | -9.011165 | -1.847574 | -0.793124 |
| 1 | -8.036510 | -2.984919 | 0.154605  |
| 1 | -5.793386 | 7.418333  | -2.743572 |
| 1 | -4.085507 | 7.739324  | -2.400649 |
| 1 | -4.601562 | 7.373947  | -4.053498 |
| 1 | -0.362342 | 8.671834  | 1.431765  |
| 1 | -2.084201 | 8.285006  | 1.278334  |
| 1 | -1.318147 | 8.288092  | 2.873083  |
| 1 | 1.245234  | 7.572909  | -1.545229 |
| 1 | 0.659585  | 8.169591  | -3.088304 |
| 1 | 2.547469  | 9.815797  | -3.163460 |
| 1 | 1.557510  | 11.361359 | -1.462601 |
| 1 | 0.289527  | 10.473076 | -2.327829 |
| 1 | 0.742970  | 9.994513  | -0.684572 |

|   |           |           |           |
|---|-----------|-----------|-----------|
| 1 | 3.823857  | 10.310117 | -1.066205 |
| 1 | 3.107439  | 8.888699  | -0.289871 |
| 1 | 4.203248  | 8.691221  | -1.667539 |
| 1 | 5.747659  | -5.234904 | -4.317485 |
| 1 | 7.913321  | -6.433228 | -4.056424 |
| 1 | 7.834711  | -5.582833 | -5.609970 |
| 1 | 8.794690  | -4.902996 | -4.289050 |
| 1 | 6.638126  | -5.540047 | -2.027369 |
| 1 | 7.520409  | -4.011020 | -2.136439 |
| 1 | 5.736339  | -4.026844 | -2.136576 |
| 1 | 6.025812  | -0.953224 | -3.750032 |
| 1 | 8.845691  | -0.166157 | -3.798231 |
| 1 | 7.952948  | 2.143827  | -3.344585 |
| 1 | 7.222032  | 1.421065  | -4.802383 |
| 1 | 6.304906  | 1.500374  | -3.278664 |
| 1 | 7.004316  | -1.626251 | -1.546277 |
| 1 | 7.013552  | -1.422638 | 2.280551  |
| 1 | 5.886303  | -1.743517 | 0.979466  |
| 1 | 4.046239  | -0.326808 | 1.316597  |
| 1 | 8.003890  | 1.361090  | 1.600664  |
| 1 | 3.067586  | 1.871471  | 1.664032  |
| 1 | 7.017454  | 3.581927  | 1.989109  |
| 1 | 4.546541  | 3.868801  | 2.047332  |
| 1 | 2.422522  | -1.833660 | -6.031863 |
| 1 | 2.908411  | -3.150886 | -4.935891 |
| 1 | 1.928874  | -3.504572 | -6.365720 |
| 1 | -1.495351 | -3.534200 | -4.421724 |
| 1 | 0.988431  | -5.247466 | 1.126315  |
| 1 | 1.794421  | -5.837108 | -0.918093 |
| 1 | 3.270931  | -5.044786 | 2.073082  |
| 1 | 2.232773  | -6.016406 | 3.141159  |
| 1 | 3.435123  | -6.812172 | 2.093897  |
| 1 | 3.438951  | -4.398672 | 8.274625  |
| 1 | 2.504397  | -6.614497 | 7.591305  |
| 1 | 1.709751  | -5.294796 | 6.714206  |
| 1 | 2.936246  | -6.283357 | 5.904616  |
| 1 | 4.960726  | -6.378881 | 8.320231  |
| 1 | 5.452591  | -6.049765 | 6.650051  |
| 1 | 5.862150  | -4.901059 | 7.935035  |
| 1 | 5.051155  | 3.033644  | 5.099743  |
| 1 | 3.907812  | 2.131703  | 6.916889  |
| 1 | 5.090674  | 0.562993  | 5.475842  |
| 1 | 6.624842  | 1.135730  | 4.816960  |
| 1 | 6.491197  | 0.750904  | 6.555760  |
| 1 | -3.808004 | 1.964071  | 4.707307  |
| 1 | -4.104109 | 2.265598  | 6.420899  |
| 1 | -6.014054 | 1.188711  | 7.582913  |
| 1 | -5.336812 | 0.530105  | 3.378189  |
| 1 | -8.280228 | 0.211718  | 7.372467  |
| 1 | -7.584382 | -0.442673 | 3.172805  |

|   |            |           |           |
|---|------------|-----------|-----------|
| 1 | -9.080627  | -0.613910 | 5.162944  |
| 1 | -6.399130  | 1.372675  | 0.048279  |
| 1 | -5.014416  | 2.111172  | -0.741155 |
| 1 | -6.206065  | -1.605192 | -0.213802 |
| 1 | -7.347010  | -4.146364 | -1.950904 |
| 1 | -8.161347  | -2.895435 | -2.896321 |
| 1 | -10.357102 | -3.598246 | -1.935093 |
| 1 | -10.549182 | -5.808895 | -0.762371 |
| 1 | -8.782628  | -5.926508 | -0.696130 |
| 1 | -9.622862  | -4.654844 | 0.205579  |
| 1 | -2.510259  | 4.931561  | -0.413208 |
| 1 | -0.381798  | 0.903467  | 4.024955  |
| 1 | -2.736055  | -3.862917 | 0.511573  |
| 1 | -3.105894  | 0.088320  | -4.476944 |
| 1 | -1.242108  | 3.015392  | 5.125417  |
| 1 | 0.382885   | 3.326609  | 4.513131  |
| 1 | -0.788957  | 4.644502  | 4.611538  |
| 1 | -2.099504  | 5.853965  | 3.248890  |
| 1 | -2.871170  | 5.863185  | 1.678615  |
| 1 | -0.640265  | 6.319983  | 0.596011  |
| 1 | 0.117292   | 6.321320  | 2.180334  |
| 1 | 0.794636   | -2.113493 | 4.715954  |
| 1 | -0.264618  | -0.803335 | 5.240800  |
| 1 | -0.802878  | -2.483059 | 5.373645  |
| 1 | -2.315439  | -4.673936 | 2.405300  |
| 1 | -1.132036  | -5.905673 | 4.071907  |
| 1 | -0.069316  | -4.454554 | 4.488207  |
| 1 | -4.559199  | -4.760988 | -2.672193 |
| 1 | -3.608349  | -5.073208 | -1.217879 |
| 1 | -5.104614  | -4.146475 | -1.110423 |
| 1 | -4.697740  | -3.377052 | -4.403018 |
| 1 | -3.876338  | -2.635239 | -6.527637 |
| 1 | -2.614746  | -1.546771 | -5.729830 |
| 1 | -3.308816  | 3.723884  | -5.552919 |
| 1 | -2.473866  | 2.179654  | -5.764924 |
| 1 | -4.200751  | 2.206422  | -5.398539 |
| 1 | -2.915480  | 5.398790  | -4.149833 |
| 1 | -2.389635  | 5.785350  | -2.523936 |
| 1 | -4.741117  | 5.397216  | -1.686852 |
| 1 | -5.252665  | 5.034645  | -3.323458 |
| 1 | -8.804997  | -5.844459 | -3.337992 |
| 1 | -10.569061 | -5.688498 | -3.287547 |
| 1 | -9.593516  | -4.475319 | -4.139579 |
| 6 | -0.173119  | 0.489082  | -0.690158 |
| 6 | 0.521748   | 1.332484  | -1.708381 |
| 6 | 0.530375   | 0.919393  | -3.047158 |
| 6 | 1.248512   | 2.497106  | -1.370631 |
| 6 | 1.225956   | 1.624940  | -4.032415 |
| 1 | -0.042659  | 0.039628  | -3.313045 |
| 6 | 1.950576   | 3.202989  | -2.355304 |



|   |          |           |           |
|---|----------|-----------|-----------|
| 6 | 1.940974 | 2.766258  | -3.682584 |
| 1 | 1.200751 | 1.280152  | -5.063040 |
| 1 | 2.516919 | 4.087981  | -2.091017 |
| 1 | 2.494146 | 3.326377  | -4.432616 |
| 6 | 0.808058 | -0.499938 | -0.140079 |
| 8 | 1.555447 | -0.279821 | 0.796767  |
| 8 | 0.795343 | -1.652008 | -0.842454 |
| 6 | 1.678695 | -2.705754 | -0.387188 |
| 1 | 1.725912 | -2.673309 | 0.703439  |
| 1 | 1.186768 | -3.621278 | -0.710151 |
| 6 | 3.061154 | -2.605431 | -1.012245 |
| 1 | 2.982492 | -2.651593 | -2.102228 |
| 1 | 3.564852 | -1.680065 | -0.714972 |
| 1 | 3.652583 | -3.467738 | -0.682646 |
| 8 | 1.220144 | 2.866277  | -0.057730 |
| 6 | 1.791866 | 4.109951  | 0.299479  |
| 1 | 2.879201 | 4.115025  | 0.147541  |
| 1 | 1.341102 | 4.934629  | -0.268386 |
| 1 | 1.569483 | 4.241873  | 1.359358  |

---

**Conf5**

---

Number of imaginary frequencies: 9    Electronic energy:    HF=-5382.3285664  
Zero-point correction=                    2.261258 (Hartree/Particle)  
Thermal correction to Energy=            2.396630  
Thermal correction to Enthalpy=         2.397574  
Thermal correction to Gibbs Free Energy= 2.042544  
Sum of electronic and zero-point Energies= -5380.067309  
Sum of electronic and thermal Energies= -5379.931936  
Sum of electronic and thermal Enthalpies= -5379.930992  
Sum of electronic and thermal Free Energies= -5380.286022

---

Cartesian Coordinates

---

|   |          |           |           |
|---|----------|-----------|-----------|
| 6 | 2.880477 | 7.086332  | -3.015320 |
| 6 | 1.660950 | 7.785715  | -3.627332 |
| 6 | 1.345138 | 7.388984  | -5.083609 |
| 6 | 0.010514 | 8.003451  | -5.531971 |
| 6 | 2.469912 | 7.777281  | -6.055885 |
| 6 | 6.391860 | -3.397846 | -4.607187 |
| 6 | 7.441393 | -2.477610 | -3.999127 |
| 8 | 8.616007 | -2.800229 | -3.856308 |
| 6 | 6.168688 | -4.718703 | -3.823678 |
| 6 | 7.369997 | -5.670789 | -3.918494 |
| 6 | 5.772300 | -4.454265 | -2.363497 |
| 7 | 6.986246 | -1.243653 | -3.591859 |
| 6 | 7.916019 | -0.224391 | -3.114329 |
| 6 | 8.345821 | -0.408378 | -1.643504 |
| 8 | 9.359512 | 0.140940  | -1.229675 |
| 6 | 7.326769 | 1.177668  | -3.305237 |

|    |            |           |           |
|----|------------|-----------|-----------|
| 7  | 7.505866   | -1.154269 | -0.874689 |
| 6  | 7.785470   | -1.476161 | 0.512377  |
| 6  | 6.858596   | -0.768861 | 1.525955  |
| 6  | 7.032346   | 0.734094  | 1.582355  |
| 6  | 6.135253   | 1.592072  | 0.932651  |
| 6  | 8.107333   | 1.302007  | 2.282368  |
| 6  | 6.307288   | 2.977942  | 0.978697  |
| 6  | 8.283353   | 2.685108  | 2.331286  |
| 6  | 7.381774   | 3.529342  | 1.677951  |
| 6  | 0.775873   | -2.390652 | -4.712539 |
| 6  | 0.364041   | -3.637995 | -3.943261 |
| 8  | 1.163647   | -4.309857 | -3.275205 |
| 6  | 2.234914   | -2.437015 | -5.172072 |
| 7  | -0.954004  | -3.930474 | -4.030992 |
| 6  | -1.580392  | -4.921305 | -3.180781 |
| 6  | 0.461677   | -7.324529 | 1.069859  |
| 6  | 1.243127   | -6.479597 | 0.059482  |
| 8  | 0.375169   | -6.247296 | -1.049029 |
| 6  | 2.536293   | -7.165259 | -0.394117 |
| 6  | 3.624460   | -3.883393 | 6.356424  |
| 6  | 2.555078   | -4.973193 | 6.191205  |
| 6  | 2.361535   | -5.339342 | 4.712622  |
| 6  | 2.897491   | -6.213736 | 7.029222  |
| 6  | 6.774296   | 3.186324  | 6.558398  |
| 6  | 5.376135   | 2.964528  | 5.992333  |
| 8  | 4.459615   | 3.308549  | 7.036174  |
| 6  | 5.161016   | 1.526646  | 5.516598  |
| 6  | -3.176006  | 0.582907  | 6.005169  |
| 6  | -3.789240  | 1.971451  | 5.745410  |
| 6  | -5.283832  | 1.912711  | 5.501394  |
| 6  | -6.190389  | 2.138528  | 6.546702  |
| 6  | -5.789756  | 1.596543  | 4.231284  |
| 6  | -7.568308  | 2.050401  | 6.336810  |
| 6  | -7.166914  | 1.506410  | 4.020437  |
| 6  | -8.061329  | 1.732427  | 5.069693  |
| 6  | -5.690186  | 0.804229  | -1.819865 |
| 6  | -7.012341  | 0.058766  | -1.761122 |
| 8  | -8.033058  | 0.464899  | -2.321046 |
| 6  | -5.272721  | 1.591501  | -0.548507 |
| 16 | -4.316377  | 0.648300  | 0.710723  |
| 7  | -6.992979  | -1.137413 | -1.093058 |
| 6  | -8.219088  | -1.913769 | -0.954407 |
| 6  | -8.595893  | -2.675092 | -2.235220 |
| 6  | -9.964283  | -3.380064 | -2.171905 |
| 6  | -10.345536 | -3.937496 | -3.551965 |
| 6  | -10.010353 | -4.492599 | -1.111751 |
| 26 | -1.873962  | 0.414180  | 0.034531  |
| 6  | -1.640260  | 3.810361  | 0.211684  |
| 6  | -0.996550  | 0.174507  | 3.323173  |
| 6  | -3.041083  | -2.757186 | 0.086214  |

|   |           |           |           |
|---|-----------|-----------|-----------|
| 6 | -2.562057 | 0.639453  | -3.317585 |
| 7 | -1.419986 | 1.742763  | 1.500298  |
| 6 | -1.337780 | 3.097703  | 1.368595  |
| 6 | -0.843239 | 3.699902  | 2.602699  |
| 6 | -0.604386 | 2.664119  | 3.465042  |
| 6 | -0.999148 | 1.447466  | 2.765506  |
| 6 | -0.014669 | 2.717081  | 4.842958  |
| 6 | -0.595493 | 5.167159  | 2.815289  |
| 6 | 0.756729  | 5.660684  | 2.256636  |
| 6 | 0.980083  | 7.160858  | 2.473073  |
| 7 | -1.928050 | -1.045386 | 1.420814  |
| 6 | -1.486362 | -0.979278 | 2.711744  |
| 6 | -1.667817 | -2.254027 | 3.383496  |
| 6 | -2.292833 | -3.080742 | 2.476856  |
| 6 | -2.438529 | -2.297720 | 1.251495  |
| 6 | -1.208062 | -2.576065 | 4.772479  |
| 6 | -2.690658 | -4.475951 | 2.608307  |
| 6 | -3.009175 | -5.133962 | 3.736458  |
| 7 | -2.531636 | -0.859516 | -1.389266 |
| 6 | -3.099049 | -2.081815 | -1.131102 |
| 6 | -3.720039 | -2.611082 | -2.324314 |
| 6 | -3.412032 | -1.734934 | -3.347278 |
| 6 | -2.718251 | -0.610944 | -2.717848 |
| 6 | -4.595410 | -3.828089 | -2.369352 |
| 6 | -3.755699 | -1.914208 | -4.752082 |
| 6 | -3.092847 | -1.450136 | -5.829142 |
| 7 | -2.045779 | 1.930414  | -1.302336 |
| 6 | -2.326838 | 1.828780  | -2.636920 |
| 6 | -2.441106 | 3.150005  | -3.237337 |
| 6 | -2.229232 | 4.051966  | -2.228112 |
| 6 | -1.969268 | 3.266690  | -1.026625 |
| 6 | -2.771585 | 3.412034  | -4.676963 |
| 6 | -2.299233 | 5.552142  | -2.287725 |
| 6 | -3.646455 | 6.131206  | -1.803933 |
| 6 | -3.691966 | 7.661214  | -1.862035 |
| 1 | 8.826099  | -1.193565 | 0.691951  |
| 1 | 7.699523  | -2.561936 | 0.648337  |
| 1 | 6.728341  | -3.639517 | -5.623501 |
| 1 | 5.430613  | -2.876802 | -4.701744 |
| 1 | 3.741503  | -3.592943 | 7.407838  |
| 1 | 4.600729  | -4.236918 | 5.997884  |
| 1 | 3.366362  | -2.983228 | 5.785905  |
| 1 | 7.532398  | 3.000658  | 5.789826  |
| 1 | 6.881196  | 4.215639  | 6.916392  |
| 1 | 6.954174  | 2.509958  | 7.402215  |
| 1 | 3.002839  | 7.364050  | -1.962111 |
| 1 | 2.770972  | 5.995220  | -3.058311 |
| 1 | 3.809840  | 7.348270  | -3.533652 |
| 1 | 1.072774  | -7.531709 | 1.955761  |
| 1 | -0.442303 | -6.795898 | 1.388735  |

|   |           |           |           |
|---|-----------|-----------|-----------|
| 1 | 0.164939  | -8.278118 | 0.616570  |
| 1 | -2.107057 | 0.657446  | 6.234535  |
| 1 | -3.669208 | 0.095425  | 6.855750  |
| 1 | -3.292153 | -0.061567 | 5.129421  |
| 1 | -2.547098 | -5.191316 | -3.609655 |
| 1 | -0.955387 | -5.814657 | -3.135042 |
| 1 | -1.727091 | -4.558293 | -2.159595 |
| 1 | 0.629008  | -1.539834 | -4.038142 |
| 1 | 0.104344  | -2.244625 | -5.567882 |
| 1 | -5.809151 | 1.512167  | -2.648857 |
| 1 | -4.896783 | 0.110826  | -2.086087 |
| 1 | -9.043914 | -1.237430 | -0.692733 |
| 1 | -8.074988 | -2.604690 | -0.117076 |
| 1 | -4.659093 | 8.045151  | -1.516977 |
| 1 | -2.912519 | 8.106711  | -1.230408 |
| 1 | -3.534618 | 8.026169  | -2.885513 |
| 1 | 1.947335  | 7.484941  | 2.070647  |
| 1 | 0.198644  | 7.753226  | 1.980244  |
| 1 | 0.961309  | 7.415586  | 3.540457  |
| 1 | 1.799697  | 8.876580  | -3.578052 |
| 1 | 0.780292  | 7.563205  | -3.009228 |
| 1 | 1.236672  | 6.293493  | -5.111715 |
| 1 | -0.247179 | 7.696644  | -6.552918 |
| 1 | -0.810517 | 7.698556  | -4.872090 |
| 1 | 0.059594  | 9.100667  | -5.517244 |
| 1 | 2.217288  | 7.488503  | -7.083381 |
| 1 | 2.634182  | 8.863540  | -6.047642 |
| 1 | 3.419879  | 7.294432  | -5.802103 |
| 1 | 5.313346  | -5.205971 | -4.312175 |
| 1 | 7.153419  | -6.611318 | -3.397341 |
| 1 | 7.599988  | -5.911295 | -4.963824 |
| 1 | 8.264353  | -5.221844 | -3.478104 |
| 1 | 5.519595  | -5.391276 | -1.854448 |
| 1 | 6.599564  | -3.992500 | -1.808680 |
| 1 | 4.894683  | -3.799404 | -2.296133 |
| 1 | 6.048852  | -0.961383 | -3.844759 |
| 1 | 8.844013  | -0.319057 | -3.685973 |
| 1 | 8.035980  | 1.920003  | -2.931114 |
| 1 | 7.130492  | 1.378147  | -4.364553 |
| 1 | 6.391221  | 1.293580  | -2.744271 |
| 1 | 6.739185  | -1.618421 | -1.341818 |
| 1 | 7.072362  | -1.202634 | 2.512606  |
| 1 | 5.814214  | -1.015446 | 1.298745  |
| 1 | 5.281723  | 1.172256  | 0.407345  |
| 1 | 8.815840  | 0.652025  | 2.792067  |
| 1 | 5.595439  | 3.625706  | 0.473113  |
| 1 | 9.125244  | 3.103661  | 2.877256  |
| 1 | 7.515241  | 4.607384  | 1.716628  |
| 1 | 2.528508  | -1.481553 | -5.621385 |
| 1 | 2.886818  | -2.640997 | -4.317160 |

|   |            |           |           |
|---|------------|-----------|-----------|
| 1 | 2.401272   | -3.228884 | -5.911965 |
| 1 | -1.560565  | -3.252535 | -4.475935 |
| 1 | 1.499318   | -5.519812 | 0.537676  |
| 1 | 0.807721   | -5.651868 | -1.694148 |
| 1 | 3.066262   | -6.543190 | -1.126129 |
| 1 | 3.212492   | -7.342905 | 0.451794  |
| 1 | 2.309012   | -8.127704 | -0.868247 |
| 1 | 1.602281   | -4.567901 | 6.563352  |
| 1 | 1.579835   | -6.098128 | 4.587359  |
| 1 | 2.070977   | -4.464844 | 4.118883  |
| 1 | 3.289859   | -5.742348 | 4.285291  |
| 1 | 2.119048   | -6.981413 | 6.941752  |
| 1 | 3.844055   | -6.660676 | 6.696199  |
| 1 | 3.004348   | -5.962432 | 8.091837  |
| 1 | 5.233669   | 3.643788  | 5.134583  |
| 1 | 3.563601   | 3.142761  | 6.703186  |
| 1 | 4.141866   | 1.389047  | 5.132287  |
| 1 | 5.855938   | 1.271985  | 4.707953  |
| 1 | 5.309544   | 0.825502  | 6.346468  |
| 1 | -3.291124  | 2.421466  | 4.878367  |
| 1 | -3.585504  | 2.623775  | 6.605715  |
| 1 | -5.811151  | 2.390048  | 7.536269  |
| 1 | -5.115290  | 1.421258  | 3.393463  |
| 1 | -8.254545  | 2.233576  | 7.161106  |
| 1 | -7.534101  | 1.260378  | 3.027387  |
| 1 | -9.133680  | 1.664832  | 4.900735  |
| 1 | -6.165205  | 2.006488  | -0.063110 |
| 1 | -4.670871  | 2.444930  | -0.874756 |
| 1 | -6.213009  | -1.291786 | -0.459610 |
| 1 | -7.815018  | -3.413769 | -2.468114 |
| 1 | -8.605809  | -1.946757 | -3.052987 |
| 1 | -10.714963 | -2.622049 | -1.899232 |
| 1 | -10.991114 | -4.984748 | -1.098737 |
| 1 | -9.255728  | -5.262689 | -1.322402 |
| 1 | -9.821109  | -4.109444 | -0.103065 |
| 1 | -1.577604  | 4.891910  | 0.271936  |
| 1 | -0.645597  | 0.084150  | 4.344414  |
| 1 | -3.501881  | -3.738056 | 0.122553  |
| 1 | -2.812351  | 0.717380  | -4.368004 |
| 1 | -0.666732  | 2.253151  | 5.592536  |
| 1 | 0.946891   | 2.185786  | 4.882076  |
| 1 | 0.164005   | 3.750199  | 5.159293  |
| 1 | -0.636606  | 5.396986  | 3.888495  |
| 1 | -1.403255  | 5.754120  | 2.355959  |
| 1 | 0.807805   | 5.425808  | 1.185738  |
| 1 | 1.566087   | 5.090761  | 2.732345  |
| 1 | -0.957218  | -3.639663 | 4.856039  |
| 1 | -0.317696  | -1.997763 | 5.043284  |
| 1 | -1.975898  | -2.363248 | 5.529728  |
| 1 | -2.727804  | -5.039962 | 1.676060  |

|   |            |           |           |
|---|------------|-----------|-----------|
| 1 | -3.271314  | -6.188189 | 3.709021  |
| 1 | -3.045935  | -4.649479 | 4.707001  |
| 1 | -4.776903  | -4.165124 | -3.394592 |
| 1 | -4.169190  | -4.672616 | -1.817095 |
| 1 | -5.571686  | -3.605638 | -1.921001 |
| 1 | -4.630454  | -2.537940 | -4.938553 |
| 1 | -3.446315  | -1.663036 | -6.834154 |
| 1 | -2.194068  | -0.846104 | -5.745481 |
| 1 | -2.710852  | 4.479333  | -4.913691 |
| 1 | -2.087151  | 2.884641  | -5.354438 |
| 1 | -3.787481  | 3.078703  | -4.927311 |
| 1 | -2.123010  | 5.889968  | -3.318630 |
| 1 | -1.490212  | 5.992635  | -1.686601 |
| 1 | -3.834895  | 5.789532  | -0.778625 |
| 1 | -4.453234  | 5.709183  | -2.416906 |
| 1 | -9.625462  | -4.699949 | -3.878719 |
| 1 | -11.338280 | -4.405192 | -3.534648 |
| 1 | -10.357690 | -3.145465 | -4.309990 |
| 6 | -0.075521  | 0.279611  | -0.280039 |
| 6 | 1.024738   | -0.044984 | 0.682058  |
| 6 | 1.784329   | 1.039244  | 1.179543  |
| 6 | 1.351017   | -1.334760 | 1.171646  |
| 6 | 2.770924   | 0.879964  | 2.149074  |
| 1 | 1.549644   | 2.033655  | 0.818211  |
| 6 | 2.362815   | -1.489543 | 2.131125  |
| 6 | 3.060901   | -0.397482 | 2.634638  |
| 1 | 3.314643   | 1.747329  | 2.512975  |
| 1 | 2.575660   | -2.500971 | 2.465047  |
| 1 | 3.833590   | -0.543579 | 3.385271  |
| 6 | 0.549641   | 0.730115  | -1.563802 |
| 8 | 0.732449   | -0.015815 | -2.511060 |
| 8 | 0.991951   | 2.010307  | -1.549402 |
| 6 | 1.857663   | 2.409630  | -2.636032 |
| 1 | 2.443214   | 3.233117  | -2.216588 |
| 1 | 2.527435   | 1.577158  | -2.872390 |
| 6 | 1.091439   | 2.855898  | -3.871821 |
| 1 | 0.533114   | 2.019009  | -4.297819 |
| 1 | 0.383814   | 3.651327  | -3.621851 |
| 1 | 1.796093   | 3.230648  | -4.625559 |
| 8 | 0.734096   | -2.493402 | 0.807309  |
| 6 | 0.550512   | -2.760724 | -0.585484 |
| 1 | -0.156468  | -2.067360 | -1.044589 |
| 1 | 1.508901   | -2.715763 | -1.115639 |
| 1 | 0.157988   | -3.775446 | -0.636527 |

---

**Conf6**

---

Number of imaginary frequencies: 9    Electronic energy:    HF=-5382.3285647  
Zero-point correction=                    2.261243 (Hartree/Particle)  
Thermal correction to Energy=            2.396630

|                                              |              |
|----------------------------------------------|--------------|
| Thermal correction to Enthalpy=              | 2.397574     |
| Thermal correction to Gibbs Free Energy=     | 2.041750     |
| Sum of electronic and zero-point Energies=   | -5380.067322 |
| Sum of electronic and thermal Energies=      | -5379.931935 |
| Sum of electronic and thermal Enthalpies=    | -5379.930991 |
| Sum of electronic and thermal Free Energies= | -5380.286815 |

.....  
 Cartesian Coordinates  
 .....

|   |           |           |           |
|---|-----------|-----------|-----------|
| 6 | 2.870335  | 7.093171  | -3.007004 |
| 6 | 1.650165  | 7.790961  | -3.619536 |
| 6 | 1.337324  | 7.396099  | -5.076964 |
| 6 | 0.001832  | 8.008126  | -5.526066 |
| 6 | 2.462503  | 7.788884  | -6.046965 |
| 6 | 6.391364  | -3.385297 | -4.615024 |
| 6 | 7.440442  | -2.464710 | -4.006710 |
| 8 | 8.615618  | -2.786076 | -3.865713 |
| 6 | 6.171022  | -4.707810 | -3.833509 |
| 6 | 7.373447  | -5.658154 | -3.931597 |
| 6 | 5.776274  | -4.446383 | -2.372339 |
| 7 | 6.984179  | -1.231975 | -3.596978 |
| 6 | 7.913117  | -0.212382 | -3.118557 |
| 6 | 8.343764  | -0.397772 | -1.648154 |
| 8 | 9.356896  | 0.152328  | -1.233988 |
| 6 | 7.322454  | 1.189350  | -3.307482 |
| 7 | 7.505178  | -1.145919 | -0.880057 |
| 6 | 7.785612  | -1.469266 | 0.506488  |
| 6 | 6.858086  | -0.764549 | 1.521265  |
| 6 | 7.030469  | 0.738465  | 1.580350  |
| 6 | 6.132559  | 1.596843  | 0.932320  |
| 6 | 8.104994  | 1.306021  | 2.281364  |
| 6 | 6.303294  | 2.982780  | 0.981067  |
| 6 | 8.279711  | 2.689183  | 2.332993  |
| 6 | 7.377281  | 3.533832  | 1.681378  |
| 6 | 0.774374  | -2.383575 | -4.716237 |
| 6 | 0.364109  | -3.632418 | -3.948597 |
| 8 | 1.164800  | -4.304893 | -3.282455 |
| 6 | 2.232476  | -2.429128 | -5.178877 |
| 7 | -0.953843 | -3.925640 | -4.035594 |
| 6 | -1.578632 | -4.918679 | -3.186791 |
| 6 | 0.467949  | -7.325694 | 1.059539  |
| 6 | 1.247927  | -6.478387 | 0.049997  |
| 8 | 0.378897  | -6.244805 | -1.057394 |
| 6 | 2.541289  | -7.162189 | -0.405802 |
| 6 | 3.629876  | -3.888696 | 6.349248  |
| 6 | 2.579753  | -4.993183 | 6.159961  |
| 6 | 2.498886  | -5.434220 | 4.691435  |
| 6 | 2.862747  | -6.187777 | 7.082608  |
| 6 | 6.772769  | 3.183891  | 6.559412  |
| 6 | 5.377592  | 2.960332  | 5.986688  |

|    |            |           |           |
|----|------------|-----------|-----------|
| 8  | 4.455528   | 3.312703  | 7.022828  |
| 6  | 5.163086   | 1.519562  | 5.519484  |
| 6  | -3.175207  | 0.571327  | 6.007512  |
| 6  | -3.786545  | 1.961455  | 5.751719  |
| 6  | -5.281051  | 1.905341  | 5.506550  |
| 6  | -6.188017  | 2.131022  | 6.551525  |
| 6  | -5.786549  | 1.591803  | 4.235613  |
| 6  | -7.565924  | 2.045335  | 6.340504  |
| 6  | -7.163681  | 1.504097  | 4.023633  |
| 6  | -8.058512  | 1.729974  | 5.072572  |
| 6  | -5.693455  | 0.800843  | -1.815969 |
| 6  | -7.015150  | 0.054653  | -1.756572 |
| 8  | -8.037303  | 0.462013  | -2.312931 |
| 6  | -5.275407  | 1.587500  | -0.544402 |
| 16 | -4.317515  | 0.643890  | 0.713317  |
| 7  | -6.993689  | -1.143665 | -1.092293 |
| 6  | -8.219235  | -1.920823 | -0.953015 |
| 6  | -8.598687  | -2.678606 | -2.235135 |
| 6  | -9.966909  | -3.383818 | -2.170895 |
| 6  | -10.350944 | -3.937615 | -3.551645 |
| 6  | -10.010753 | -4.499147 | -1.113588 |
| 26 | -1.875508  | 0.412842  | 0.035553  |
| 6  | -1.643412  | 3.808452  | 0.222267  |
| 6  | -0.996776  | 0.164141  | 3.323225  |
| 6  | -3.041171  | -2.759201 | 0.078458  |
| 6  | -2.564588  | 0.647177  | -3.315814 |
| 7  | -1.421616  | 1.737352  | 1.504998  |
| 6  | -1.339896  | 3.092669  | 1.376981  |
| 6  | -0.844571  | 3.691589  | 2.612359  |
| 6  | -0.604713  | 2.653483  | 3.471636  |
| 6  | -0.999801  | 1.438662  | 2.769086  |
| 6  | -0.013695  | 2.702882  | 4.849127  |
| 6  | -0.597025  | 5.158320  | 2.828804  |
| 6  | 0.754741   | 5.653672  | 2.270665  |
| 6  | 0.977873   | 7.153312  | 2.490989  |
| 7  | -1.928506  | -1.050631 | 1.417674  |
| 6  | -1.486736  | -0.987970 | 2.708742  |
| 6  | -1.668180  | -2.264522 | 3.377120  |
| 6  | -2.293270  | -3.088767 | 2.468329  |
| 6  | -2.438896  | -2.302561 | 1.244997  |
| 6  | -1.208221  | -2.590119 | 4.765209  |
| 6  | -2.691311  | -4.484296 | 2.596177  |
| 6  | -3.012263  | -5.144287 | 3.722447  |
| 7  | -2.532668  | -0.857309 | -1.391836 |
| 6  | -3.099239  | -2.080743 | -1.137165 |
| 6  | -3.719394  | -2.607268 | -2.332054 |
| 6  | -3.411758  | -1.728045 | -3.352497 |
| 6  | -2.719295  | -0.605155 | -2.719740 |
| 6  | -4.594354  | -3.824436 | -2.381055 |
| 6  | -3.754721  | -1.903741 | -4.757946 |



|   |           |           |           |
|---|-----------|-----------|-----------|
| 6 | -3.091444 | -1.436405 | -5.833313 |
| 7 | -2.048887 | 1.932674  | -1.296931 |
| 6 | -2.330409 | 1.834722  | -2.631687 |
| 6 | -2.445832 | 3.157626  | -3.228203 |
| 6 | -2.233978 | 4.056776  | -2.216475 |
| 6 | -1.972952 | 3.268175  | -1.017391 |
| 6 | -2.777229 | 3.423592  | -4.666896 |
| 6 | -2.304814 | 5.557077  | -2.271683 |
| 6 | -3.651892 | 6.134062  | -1.785022 |
| 6 | -3.698178 | 7.664218  | -1.838561 |
| 1 | 8.825918  | -1.185535 | 0.686147  |
| 1 | 7.701132  | -2.555334 | 0.641019  |
| 1 | 6.726769  | -3.624727 | -5.632222 |
| 1 | 5.429268  | -2.865414 | -4.707310 |
| 1 | 3.668032  | -3.546555 | 7.390837  |
| 1 | 4.631307  | -4.251801 | 6.080960  |
| 1 | 3.410608  | -3.019215 | 5.718104  |
| 1 | 7.535052  | 2.992238  | 5.796469  |
| 1 | 6.879022  | 4.215380  | 6.911283  |
| 1 | 6.946827  | 2.512816  | 7.408657  |
| 1 | 2.990673  | 7.369420  | -1.953176 |
| 1 | 2.763210  | 6.001900  | -3.051922 |
| 1 | 3.799854  | 7.357921  | -3.523633 |
| 1 | 1.080088  | -7.534114 | 1.944459  |
| 1 | -0.436094 | -6.798313 | 1.380286  |
| 1 | 0.171488  | -8.278671 | 0.604791  |
| 1 | -2.106442 | 0.643753  | 6.238455  |
| 1 | -3.669997 | 0.081638  | 6.855908  |
| 1 | -3.291105 | -0.070139 | 5.129529  |
| 1 | -2.544818 | -5.189869 | -3.616101 |
| 1 | -0.952031 | -5.810953 | -3.142243 |
| 1 | -1.726078 | -4.557342 | -2.165103 |
| 1 | 0.628874  | -1.534053 | -4.039929 |
| 1 | 0.101137  | -2.235857 | -5.569933 |
| 1 | -5.813567 | 1.509362  | -2.644302 |
| 1 | -4.899847 | 0.108135  | -2.083370 |
| 1 | -9.043707 | -1.245554 | -0.687468 |
| 1 | -8.072939 | -2.614118 | -0.118036 |
| 1 | -4.665234 | 8.046656  | -1.491646 |
| 1 | -2.918477 | 8.108211  | -1.206190 |
| 1 | -3.541743 | 8.032284  | -2.861062 |
| 1 | 1.944804  | 7.478699  | 2.088846  |
| 1 | 0.195993  | 7.746810  | 2.000223  |
| 1 | 0.959694  | 7.405172  | 3.559062  |
| 1 | 1.786454  | 8.882040  | -3.568151 |
| 1 | 0.769121  | 7.565456  | -3.003073 |
| 1 | 1.231562  | 6.300399  | -5.107203 |
| 1 | -0.253589 | 7.702749  | -6.548014 |
| 1 | -0.819398 | 7.699803  | -4.868030 |
| 1 | 0.048118  | 9.105429  | -5.509027 |

|   |           |           |           |
|---|-----------|-----------|-----------|
| 1 | 2.212086  | 7.501223  | -7.075315 |
| 1 | 2.624025  | 8.875537  | -6.036637 |
| 1 | 3.413318  | 7.307999  | -5.792633 |
| 1 | 5.315659  | -5.195360 | -4.321685 |
| 1 | 7.158805  | -6.599870 | -3.411788 |
| 1 | 7.602333  | -5.896550 | -4.977654 |
| 1 | 8.267806  | -5.208799 | -3.491636 |
| 1 | 5.525443  | -5.384578 | -1.864546 |
| 1 | 6.603691  | -3.984496 | -1.817856 |
| 1 | 4.897920  | -3.792744 | -2.302694 |
| 1 | 6.046149  | -0.950487 | -3.848386 |
| 1 | 8.840932  | -0.305469 | -3.690746 |
| 1 | 8.031086  | 1.931885  | -2.932660 |
| 1 | 7.125600  | 1.390973  | -4.366470 |
| 1 | 6.386989  | 1.303662  | -2.746042 |
| 1 | 6.738798  | -1.610268 | -1.347480 |
| 1 | 7.072208  | -1.199813 | 2.507180  |
| 1 | 5.813938  | -1.011700 | 1.293602  |
| 1 | 5.279407  | 1.177244  | 0.406230  |
| 1 | 8.814172  | 0.655700  | 2.789701  |
| 1 | 5.590938  | 3.630915  | 0.476670  |
| 1 | 9.121231  | 3.107471  | 2.879735  |
| 1 | 7.509730  | 4.611922  | 1.722134  |
| 1 | 2.525256  | -1.472766 | -5.626805 |
| 1 | 2.886184  | -2.635001 | -4.325796 |
| 1 | 2.397207  | -3.219442 | -5.920797 |
| 1 | -1.561254 | -3.247009 | -4.478313 |
| 1 | 1.503732  | -5.519208 | 0.529651  |
| 1 | 0.810643  | -5.648277 | -1.702051 |
| 1 | 3.070102  | -6.538451 | -1.137229 |
| 1 | 3.218308  | -7.340621 | 0.439269  |
| 1 | 2.314430  | -8.124039 | -0.881342 |
| 1 | 1.600315  | -4.576727 | 6.438750  |
| 1 | 1.731449  | -6.204088 | 4.546970  |
| 1 | 2.249957  | -4.592274 | 4.034966  |
| 1 | 3.458129  | -5.850814 | 4.355122  |
| 1 | 2.095743  | -6.964507 | 6.976058  |
| 1 | 3.833274  | -6.643906 | 6.844418  |
| 1 | 2.888535  | -5.882800 | 8.136161  |
| 1 | 5.241190  | 3.633943  | 5.123533  |
| 1 | 3.561187  | 3.146423  | 6.685607  |
| 1 | 4.145910  | 1.380793  | 5.130423  |
| 1 | 5.862169  | 1.258528  | 4.716475  |
| 1 | 5.305967  | 0.823824  | 6.354874  |
| 1 | -3.287291 | 2.413607  | 4.886440  |
| 1 | -3.582587 | 2.610802  | 6.614214  |
| 1 | -5.809113 | 2.380491  | 7.541737  |
| 1 | -5.111814 | 1.416639  | 3.397993  |
| 1 | -8.252471 | 2.228357  | 7.164576  |
| 1 | -7.530502 | 1.260039  | 3.029963  |

|   |            |           |           |
|---|------------|-----------|-----------|
| 1 | -9.130841  | 1.664270  | 4.902733  |
| 1 | -6.167755  | 2.001646  | -0.058043 |
| 1 | -4.674288  | 2.441480  | -0.870551 |
| 1 | -6.212735  | -1.299028 | -0.460322 |
| 1 | -7.818290  | -3.416643 | -2.471685 |
| 1 | -8.610351  | -1.948052 | -3.050893 |
| 1 | -10.717055 | -2.626557 | -1.894689 |
| 1 | -10.991446 | -4.991412 | -1.099900 |
| 1 | -9.256490  | -5.268612 | -1.327788 |
| 1 | -9.819512  | -4.118632 | -0.104280 |
| 1 | -1.581127  | 4.889851  | 0.285524  |
| 1 | -0.645283  | 0.070887  | 4.344033  |
| 1 | -3.501553  | -3.740356 | 0.112279  |
| 1 | -2.815003  | 0.727862  | -4.366004 |
| 1 | -0.665230  | 2.237446  | 5.598216  |
| 1 | 0.947671   | 2.171080  | 4.886056  |
| 1 | 0.165644   | 3.735184  | 5.167766  |
| 1 | -0.637569  | 5.385235  | 3.902650  |
| 1 | -1.405192  | 5.746337  | 2.371545  |
| 1 | 0.805211   | 5.421679  | 1.199108  |
| 1 | 1.564533   | 5.082674  | 2.744345  |
| 1 | -0.960860  | -3.654669 | 4.846951  |
| 1 | -0.315630  | -2.015194 | 5.035943  |
| 1 | -1.974654  | -2.375863 | 5.523472  |
| 1 | -2.726481  | -5.046535 | 1.662772  |
| 1 | -3.274270  | -6.198486 | 3.692677  |
| 1 | -3.051097  | -4.661408 | 4.693724  |
| 1 | -4.771506  | -4.161269 | -3.407130 |
| 1 | -4.170370  | -4.669007 | -1.827202 |
| 1 | -5.572556  | -3.602126 | -1.936817 |
| 1 | -4.629122  | -2.527329 | -4.946556 |
| 1 | -3.444201  | -1.646658 | -6.839135 |
| 1 | -2.192919  | -0.832320 | -5.747366 |
| 1 | -2.717573  | 4.491635  | -4.900525 |
| 1 | -2.092647  | 2.898806  | -5.346246 |
| 1 | -3.792942  | 3.090079  | -4.917736 |
| 1 | -2.129699  | 5.897971  | -3.301767 |
| 1 | -1.495467  | 5.996245  | -1.670029 |
| 1 | -3.839302  | 5.789273  | -0.760571 |
| 1 | -4.458989  | 5.713461  | -2.398556 |
| 1 | -9.631515  | -4.699180 | -3.881876 |
| 1 | -11.343637 | -4.405386 | -3.533544 |
| 1 | -10.364663 | -3.143585 | -4.307549 |
| 6 | -0.077090  | 0.280276  | -0.280339 |
| 6 | 1.023978   | -0.044654 | 0.680770  |
| 6 | 1.782847   | 1.039620  | 1.179283  |
| 6 | 1.351585   | -1.334750 | 1.168622  |
| 6 | 2.769988   | 0.880038  | 2.148185  |
| 1 | 1.547140   | 2.034262  | 0.819260  |
| 6 | 2.363720   | -1.489699 | 2.127707  |

|   |           |           |           |
|---|-----------|-----------|-----------|
| 6 | 3.061170  | -0.397739 | 2.632195  |
| 1 | 3.313199  | 1.747407  | 2.512838  |
| 1 | 2.577129  | -2.501367 | 2.460703  |
| 1 | 3.834367  | -0.544057 | 3.382266  |
| 6 | 0.547092  | 0.732932  | -1.563813 |
| 8 | 0.730180  | -0.011601 | -2.512102 |
| 8 | 0.988222  | 2.013528  | -1.547994 |
| 6 | 1.852838  | 2.415112  | -2.634643 |
| 1 | 2.438119  | 3.238393  | -2.214413 |
| 1 | 2.523027  | 1.583485  | -2.872781 |
| 6 | 1.085313  | 2.862735  | -3.869133 |
| 1 | 0.527187  | 2.026127  | -4.295967 |
| 1 | 0.377375  | 3.657306  | -3.617328 |
| 1 | 1.789084  | 3.239120  | -4.622882 |
| 8 | 0.735930  | -2.493628 | 0.802960  |
| 6 | 0.550899  | -2.758821 | -0.590050 |
| 1 | -0.157550 | -2.065587 | -1.047066 |
| 1 | 1.508558  | -2.711769 | -1.121338 |
| 1 | 0.159555  | -3.773943 | -0.642252 |

---

**Conf7**

---

Number of imaginary frequencies: 9    Electronic energy:    HF=-5382.3290052  
Zero-point correction=                    2.261596 (Hartree/Particle)  
Thermal correction to Energy=            2.396679  
Thermal correction to Enthalpy=        2.397624  
Thermal correction to Gibbs Free Energy=    2.045693  
Sum of electronic and zero-point Energies=    -5380.067409  
Sum of electronic and thermal Energies=    -5379.932326  
Sum of electronic and thermal Enthalpies=   -5379.931382  
Sum of electronic and thermal Free Energies=   -5380.283313

---

Cartesian Coordinates

---

|   |          |           |           |
|---|----------|-----------|-----------|
| 6 | 2.765869 | 7.597304  | -1.172004 |
| 6 | 1.477757 | 7.370935  | -1.972243 |
| 6 | 1.649330 | 7.421156  | -3.503727 |
| 6 | 0.364805 | 6.953991  | -4.204528 |
| 6 | 2.066487 | 8.812719  | -4.004594 |
| 6 | 6.498585 | -2.185918 | -5.062607 |
| 6 | 7.534661 | -1.390832 | -4.280430 |
| 8 | 8.723791 | -1.689683 | -4.247412 |
| 6 | 6.372167 | -3.669753 | -4.626797 |
| 6 | 7.602154 | -4.504440 | -5.013208 |
| 6 | 6.053127 | -3.797478 | -3.129585 |
| 7 | 7.047827 | -0.310754 | -3.581159 |
| 6 | 7.948247 | 0.592410  | -2.871361 |
| 6 | 8.375750 | 0.082063  | -1.479211 |
| 8 | 9.344756 | 0.577664  | -0.916911 |
| 6 | 7.328840 | 1.988633  | -2.744393 |

|    |           |           |           |
|----|-----------|-----------|-----------|
| 7  | 7.590698  | -0.891602 | -0.942577 |
| 6  | 7.818196  | -1.452592 | 0.374853  |
| 6  | 6.813959  | -0.954863 | 1.441655  |
| 6  | 6.888008  | 0.536805  | 1.685686  |
| 6  | 5.990455  | 1.415853  | 1.065672  |
| 6  | 7.889881  | 1.077291  | 2.505176  |
| 6  | 6.104179  | 2.797332  | 1.241744  |
| 6  | 7.998663  | 2.455238  | 2.694778  |
| 6  | 7.107701  | 3.321904  | 2.057707  |
| 6  | 0.864305  | -1.282801 | -4.999655 |
| 6  | 0.446521  | -2.657690 | -4.496631 |
| 8  | 1.241512  | -3.429014 | -3.934916 |
| 6  | 2.227891  | -1.310014 | -5.698229 |
| 7  | -0.848145 | -2.963901 | -4.702579 |
| 6  | -1.450896 | -4.137411 | -4.108853 |
| 6  | 0.610079  | -7.406115 | -0.492044 |
| 6  | 1.260541  | -6.619814 | -1.632270 |
| 8  | 0.336772  | -5.605655 | -2.013231 |
| 6  | 1.617550  | -7.508593 | -2.828931 |
| 6  | 3.666686  | -5.199261 | 5.472823  |
| 6  | 3.053596  | -6.601539 | 5.600486  |
| 6  | 2.428860  | -7.057807 | 4.273785  |
| 6  | 4.094754  | -7.614809 | 6.098807  |
| 6  | 6.671987  | 1.695456  | 7.309623  |
| 6  | 5.352718  | 1.107555  | 6.820925  |
| 8  | 4.663576  | 0.645926  | 7.987579  |
| 6  | 5.553207  | -0.023750 | 5.810960  |
| 6  | -3.219793 | -0.893609 | 6.068190  |
| 6  | -4.158303 | 0.323041  | 5.963617  |
| 6  | -5.593261 | -0.067708 | 5.672792  |
| 6  | -6.489498 | -0.333750 | 6.718014  |
| 6  | -6.043250 | -0.203819 | 4.351079  |
| 6  | -7.802723 | -0.729579 | 6.456703  |
| 6  | -7.356365 | -0.600347 | 4.088767  |
| 6  | -8.240496 | -0.865074 | 5.137281  |
| 6  | -5.684472 | 1.054014  | -1.530065 |
| 6  | -6.942394 | 0.237786  | -1.776653 |
| 8  | -7.862001 | 0.632967  | -2.498910 |
| 6  | -5.388652 | 1.456552  | -0.062488 |
| 16 | -4.340561 | 0.271330  | 0.878892  |
| 7  | -6.985423 | -0.992064 | -1.181703 |
| 6  | -8.163877 | -1.834722 | -1.332614 |
| 6  | -8.225766 | -2.552369 | -2.691025 |
| 6  | -9.532608 | -3.329377 | -2.939600 |
| 6  | -9.590575 | -3.834813 | -4.389405 |
| 6  | -9.725726 | -4.495550 | -1.956424 |
| 26 | -1.869637 | 0.564926  | 0.126533  |
| 6  | -2.166429 | 3.916562  | 0.700489  |
| 6  | -0.893467 | 0.082450  | 3.347999  |
| 6  | -2.520201 | -2.756068 | -0.173023 |

|   |           |           |           |
|---|-----------|-----------|-----------|
| 6 | -2.679301 | 1.054196  | -3.150229 |
| 7 | -1.629793 | 1.765925  | 1.728375  |
| 6 | -1.820864 | 3.111643  | 1.783813  |
| 6 | -1.540533 | 3.613946  | 3.125751  |
| 6 | -1.124595 | 2.535064  | 3.856845  |
| 6 | -1.193063 | 1.382794  | 2.966029  |
| 6 | -0.697722 | 2.489678  | 5.294700  |
| 6 | -1.690601 | 5.043558  | 3.567903  |
| 6 | -0.476846 | 5.943528  | 3.252021  |
| 6 | -0.685866 | 7.397889  | 3.686540  |
| 7 | -1.603548 | -1.057801 | 1.308634  |
| 6 | -1.113135 | -1.064829 | 2.584581  |
| 6 | -0.977891 | -2.422293 | 3.074509  |
| 6 | -1.479769 | -3.242289 | 2.082786  |
| 6 | -1.875204 | -2.356190 | 0.992640  |
| 6 | -0.366222 | -2.818554 | 4.383674  |
| 6 | -1.568571 | -4.693998 | 2.023361  |
| 6 | -1.575562 | -5.564237 | 3.049978  |
| 7 | -2.413016 | -0.633353 | -1.403418 |
| 6 | -2.814772 | -1.937189 | -1.257577 |
| 6 | -3.518570 | -2.378656 | -2.438015 |
| 6 | -3.399567 | -1.363458 | -3.368455 |
| 6 | -2.733461 | -0.259588 | -2.672956 |
| 6 | -4.284088 | -3.664714 | -2.532917 |
| 6 | -3.876741 | -1.418946 | -4.742777 |
| 6 | -3.395995 | -0.774069 | -5.824975 |
| 7 | -2.279200 | 2.180162  | -1.013384 |
| 6 | -2.518222 | 2.186040  | -2.359506 |
| 6 | -2.717502 | 3.547665  | -2.839205 |
| 6 | -2.625170 | 4.359642  | -1.742102 |
| 6 | -2.345495 | 3.482675  | -0.608697 |
| 6 | -3.011778 | 3.921114  | -4.261766 |
| 6 | -2.827290 | 5.846431  | -1.660798 |
| 6 | -4.251826 | 6.254643  | -1.226531 |
| 6 | -4.434444 | 7.772986  | -1.135893 |
| 1 | 8.836821  | -1.175421 | 0.658150  |
| 1 | 7.766421  | -2.546854 | 0.312166  |
| 1 | 6.794114  | -2.149398 | -6.119015 |
| 1 | 5.512377  | -1.709573 | -4.989197 |
| 1 | 4.082284  | -4.855893 | 6.428254  |
| 1 | 4.479811  | -5.194661 | 4.734694  |
| 1 | 2.919850  | -4.465844 | 5.146713  |
| 1 | 7.237515  | 2.120403  | 6.473179  |
| 1 | 6.488099  | 2.484074  | 8.046644  |
| 1 | 7.280235  | 0.917332  | 7.785514  |
| 1 | 2.582114  | 7.486269  | -0.096889 |
| 1 | 3.537324  | 6.868589  | -1.452688 |
| 1 | 3.183692  | 8.598386  | -1.330872 |
| 1 | 1.271108  | -8.208226 | -0.143745 |
| 1 | 0.387682  | -6.744968 | 0.351439  |

|   |           |           |           |
|---|-----------|-----------|-----------|
| 1 | -0.330372 | -7.854444 | -0.834525 |
| 1 | -2.197576 | -0.581233 | 6.313664  |
| 1 | -3.560660 | -1.585538 | 6.848501  |
| 1 | -3.188654 | -1.438208 | 5.119521  |
| 1 | -2.463662 | -4.240657 | -4.498495 |
| 1 | -0.875733 | -5.028404 | -4.374911 |
| 1 | -1.479714 | -4.071518 | -3.019239 |
| 1 | 0.917638  | -0.633874 | -4.115853 |
| 1 | 0.096665  | -0.863582 | -5.660019 |
| 1 | -5.814293 | 1.955976  | -2.139571 |
| 1 | -4.832073 | 0.510111  | -1.928418 |
| 1 | -9.057744 | -1.206914 | -1.226143 |
| 1 | -8.160002 | -2.556648 | -0.508614 |
| 1 | -5.453844 | 8.035442  | -0.829247 |
| 1 | -3.743058 | 8.213721  | -0.405988 |
| 1 | -4.242543 | 8.255391  | -2.103196 |
| 1 | 0.190394  | 8.016141  | 3.457183  |
| 1 | -1.550092 | 7.842928  | 3.177386  |
| 1 | -0.869481 | 7.467074  | 4.766421  |
| 1 | 0.723722  | 8.115119  | -1.674164 |
| 1 | 1.066400  | 6.390352  | -1.701844 |
| 1 | 2.450678  | 6.713252  | -3.769400 |
| 1 | 0.483227  | 6.952025  | -5.295393 |
| 1 | 0.088814  | 5.941035  | -3.890262 |
| 1 | -0.475333 | 7.619241  | -3.963832 |
| 1 | 2.186448  | 8.818931  | -5.095044 |
| 1 | 1.303549  | 9.561400  | -3.751256 |
| 1 | 3.015232  | 9.142391  | -3.566400 |
| 1 | 5.509810  | -4.064892 | -5.182099 |
| 1 | 7.454003  | -5.554913 | -4.734301 |
| 1 | 7.778986  | -4.466228 | -6.095196 |
| 1 | 8.501915  | -4.131196 | -4.517045 |
| 1 | 5.866910  | -4.843231 | -2.860243 |
| 1 | 6.893780  | -3.445337 | -2.518117 |
| 1 | 5.157188  | -3.224858 | -2.858045 |
| 1 | 6.092452  | -0.017015 | -3.734129 |
| 1 | 8.879669  | 0.650747  | -3.442339 |
| 1 | 8.013026  | 2.635807  | -2.190582 |
| 1 | 7.149127  | 2.424754  | -3.733336 |
| 1 | 6.379956  | 1.955796  | -2.195643 |
| 1 | 6.835069  | -1.248257 | -1.510340 |
| 1 | 7.022785  | -1.501577 | 2.371014  |
| 1 | 5.797103  | -1.233582 | 1.137256  |
| 1 | 5.189025  | 1.017533  | 0.447992  |
| 1 | 8.598193  | 0.410425  | 2.992649  |
| 1 | 5.405499  | 3.460006  | 0.737928  |
| 1 | 8.784103  | 2.852127  | 3.333103  |
| 1 | 7.194346  | 4.396300  | 2.197720  |
| 1 | 2.568744  | -0.295022 | -5.930182 |
| 1 | 2.965906  | -1.792901 | -5.050421 |

|   |            |           |           |
|---|------------|-----------|-----------|
| 1 | 2.184894   | -1.876953 | -6.635546 |
| 1 | -1.474163  | -2.250964 | -5.056393 |
| 1 | 2.186950   | -6.159231 | -1.250024 |
| 1 | 0.759259   | -4.981405 | -2.638472 |
| 1 | 2.057654   | -6.909225 | -3.635171 |
| 1 | 2.340177   | -8.286256 | -2.550335 |
| 1 | 0.716059   | -7.994884 | -3.220539 |
| 1 | 2.249849   | -6.549885 | 6.350578  |
| 1 | 1.977169   | -8.053074 | 4.368623  |
| 1 | 1.647112   | -6.367419 | 3.935834  |
| 1 | 3.189116   | -7.112024 | 3.483040  |
| 1 | 3.653760   | -8.611121 | 6.226727  |
| 1 | 4.922570   | -7.707374 | 5.382879  |
| 1 | 4.521647   | -7.309599 | 7.062253  |
| 1 | 4.767995   | 1.910213  | 6.339844  |
| 1 | 3.832172   | 0.242392  | 7.692833  |
| 1 | 4.588921   | -0.433473 | 5.483365  |
| 1 | 6.079419   | 0.331067  | 4.917383  |
| 1 | 6.133323   | -0.836591 | 6.264004  |
| 1 | -3.791232  | 0.984405  | 5.170053  |
| 1 | -4.116508  | 0.892459  | 6.902637  |
| 1 | -6.154562  | -0.224979 | 7.748807  |
| 1 | -5.374348  | 0.005705  | 3.515869  |
| 1 | -8.483648  | -0.926991 | 7.282136  |
| 1 | -7.682855  | -0.696048 | 3.056254  |
| 1 | -9.263672  | -1.169942 | 4.929069  |
| 1 | -6.330742  | 1.599473  | 0.482638  |
| 1 | -4.886711  | 2.428171  | -0.078368 |
| 1 | -6.260080  | -1.208364 | -0.500590 |
| 1 | -7.369702  | -3.236376 | -2.783712 |
| 1 | -8.112425  | -1.784752 | -3.464215 |
| 1 | -10.368147 | -2.626184 | -2.798013 |
| 1 | -10.656938 | -5.037644 | -2.164799 |
| 1 | -8.898539  | -5.213949 | -2.037164 |
| 1 | -9.768687  | -4.154869 | -0.916164 |
| 1 | -2.271159  | 4.979887  | 0.888187  |
| 1 | -0.530542  | -0.059667 | 4.359976  |
| 1 | -2.823943  | -3.794444 | -0.243955 |
| 1 | -2.977530  | 1.220635  | -4.177071 |
| 1 | -1.328421  | 1.815133  | 5.888011  |
| 1 | 0.336641   | 2.134905  | 5.402398  |
| 1 | -0.751889  | 3.480494  | 5.757586  |
| 1 | -1.875524  | 5.075844  | 4.650172  |
| 1 | -2.584189  | 5.482177  | 3.102390  |
| 1 | -0.269773  | 5.902100  | 2.174857  |
| 1 | 0.410646   | 5.530880  | 3.750010  |
| 1 | 0.196960   | -3.753752 | 4.276712  |
| 1 | 0.324324   | -2.052178 | 4.751016  |
| 1 | -1.118317  | -2.984552 | 5.167597  |
| 1 | -1.630397  | -5.112082 | 1.018760  |



|   |            |           |           |
|---|------------|-----------|-----------|
| 1 | -1.630891  | -6.633909 | 2.866981  |
| 1 | -1.560639  | -5.250469 | 4.088572  |
| 1 | -4.667853  | -3.842728 | -3.541973 |
| 1 | -3.679424  | -4.535337 | -2.252673 |
| 1 | -5.146043  | -3.640961 | -1.854680 |
| 1 | -4.699195  | -2.114368 | -4.913128 |
| 1 | -3.844332  | -0.921048 | -6.803396 |
| 1 | -2.568767  | -0.071724 | -5.772221 |
| 1 | -3.009782  | 5.007498  | -4.397892 |
| 1 | -2.270284  | 3.500834  | -4.953790 |
| 1 | -3.995009  | 3.552273  | -4.583902 |
| 1 | -2.613337  | 6.302382  | -2.636910 |
| 1 | -2.103017  | 6.287911  | -0.961449 |
| 1 | -4.477901  | 5.792487  | -0.257355 |
| 1 | -4.973619  | 5.833026  | -1.937933 |
| 1 | -8.773724  | -4.541251 | -4.590420 |
| 1 | -10.535479 | -4.353808 | -4.595683 |
| 1 | -9.496716  | -3.006786 | -5.101925 |
| 6 | -0.108740  | 0.660087  | -0.259840 |
| 6 | 0.666581   | 1.760321  | -0.910592 |
| 6 | 0.718061   | 1.839627  | -2.307530 |
| 6 | 1.467499   | 2.659448  | -0.162583 |
| 6 | 1.547932   | 2.755999  | -2.961614 |
| 1 | 0.092079   | 1.166580  | -2.882250 |
| 6 | 2.299407   | 3.577053  | -0.815393 |
| 6 | 2.344011   | 3.618057  | -2.213388 |
| 1 | 1.566576   | 2.788484  | -4.047967 |
| 1 | 2.909891   | 4.264695  | -0.240293 |
| 1 | 3.001111   | 4.331041  | -2.705466 |
| 6 | 0.882726   | -0.417821 | 0.075969  |
| 8 | 1.592924   | -0.426647 | 1.063432  |
| 8 | 0.975751   | -1.327159 | -0.922127 |
| 6 | 2.075756   | -2.267335 | -0.821193 |
| 1 | 2.205037   | -2.623166 | -1.845299 |
| 1 | 2.966407   | -1.716191 | -0.499395 |
| 6 | 1.775636   | -3.415460 | 0.129588  |
| 1 | 1.591197   | -3.045145 | 1.139966  |
| 1 | 0.908235   | -3.981463 | -0.218193 |
| 1 | 2.638801   | -4.094127 | 0.158810  |
| 8 | 1.358648   | 2.563615  | 1.188721  |
| 6 | 2.195097   | 3.355426  | 2.006633  |
| 1 | 3.256178   | 3.125933  | 1.842437  |
| 1 | 2.024641   | 4.428921  | 1.845979  |
| 1 | 1.924431   | 3.102773  | 3.032616  |

---

**$\omega$ -Substrate**

-----  
Number of imaginary frequencies: 0    Electronic energy:    HF=-761.259606  
Zero-point correction=                    0.222793 (Hartree/Particle)  
Thermal correction to Energy=            0.238203  
Thermal correction to Enthalpy=         0.239147  
Thermal correction to Gibbs Free Energy= 0.178723  
Sum of electronic and zero-point Energies= -761.036813  
Sum of electronic and thermal Energies= -761.021403  
Sum of electronic and thermal Enthalpies= -761.020459  
Sum of electronic and thermal Free Energies= -761.080883  
.....

Cartesian Coordinates

-----  
6    -3.567523   -1.528803   0.055952  
6    -2.495284   -2.363628   0.340252  
6    -1.209510   -1.836284   0.410958  
6    -0.973775   -0.478931   0.185416  
6    -2.069945   0.354493   -0.118987  
6    -3.360074   -0.170150   -0.171237  
6    0.398391   0.060813   0.248314  
7    0.601906   1.269816   0.720688  
7    0.785248   2.307511   1.127951  
8    -1.773443   1.660333   -0.348978  
6    -2.819898   2.541178   -0.687540  
6    1.600702   -0.670683   -0.160975  
8    2.710847   0.076544   -0.006020  
8    1.608018   -1.806375   -0.584720  
1    -0.367356   -2.483005   0.624155  
1    -2.652845   -3.423142   0.513529  
1    -4.205681   0.468621   -0.398208  
1    -4.576328   -1.927373   0.005944  
1    -2.352901   3.514650   -0.840913  
1    -3.322753   2.228876   -1.611480  
1    -3.558550   2.617022   0.120515  
6    3.942301   -0.555701   -0.378552  
1    4.068727   -1.466418   0.214911  
1    3.887241   -0.849709   -1.431077  
6    5.053690   0.441726   -0.127451  
1    6.016752   -0.001337   -0.399577  
1    4.906680   1.345756   -0.725594  
1    5.089112   0.726572   0.928160  
-----

**ω-A<sub>Ir</sub>(Me)**

-----  
Number of imaginary frequencies: 0    Electronic energy:    HF=-1978.9348032  
Zero-point correction=                    0.644697 (Hartree/Particle)  
Thermal correction to Energy=            0.686457  
Thermal correction to Enthalpy=         0.687402  
Thermal correction to Gibbs Free Energy= 0.569519  
Sum of electronic and zero-point Energies= -1978.290106  
-----

Sum of electronic and thermal Energies= -1978.248346  
Sum of electronic and thermal Enthalpies= -1978.247402  
Sum of electronic and thermal Free Energies= -1978.365284

.....  
Cartesian Coordinates  
.....

|    |           |           |           |
|----|-----------|-----------|-----------|
| 6  | -4.094519 | -2.878333 | 0.138152  |
| 6  | -2.716566 | -2.463837 | -0.012640 |
| 7  | -2.640105 | -1.097746 | -0.073456 |
| 6  | -3.916649 | -0.623765 | 0.049953  |
| 6  | -4.842805 | -1.734376 | 0.181247  |
| 6  | -1.632421 | -3.324006 | -0.091310 |
| 6  | -0.305895 | -2.970076 | -0.272506 |
| 7  | 0.162206  | -1.690311 | -0.387493 |
| 6  | 1.516646  | -1.777118 | -0.561950 |
| 6  | 1.921094  | -3.170923 | -0.578392 |
| 6  | 0.791112  | -3.907800 | -0.386626 |
| 6  | 2.369968  | -0.692344 | -0.683126 |
| 6  | 2.018696  | 0.647730  | -0.632534 |
| 7  | 0.743820  | 1.121018  | -0.492853 |
| 6  | 0.823668  | 2.486808  | -0.493699 |
| 6  | 2.203159  | 2.898895  | -0.639140 |
| 6  | 2.944476  | 1.759199  | -0.720554 |
| 6  | -0.247187 | 3.353148  | -0.350081 |
| 6  | -1.576707 | 3.004191  | -0.174208 |
| 7  | -2.050969 | 1.720942  | -0.160802 |
| 6  | -3.410465 | 1.798640  | -0.020387 |
| 6  | -3.821868 | 3.181206  | 0.038456  |
| 6  | -2.684582 | 3.934859  | -0.032771 |
| 77 | -0.939590 | 0.013763  | -0.227976 |
| 6  | -4.269179 | 0.714587  | 0.076663  |
| 1  | -0.027057 | 4.413887  | -0.391829 |
| 1  | -5.322932 | 0.941407  | 0.202013  |
| 1  | -1.844847 | -4.385288 | -0.012102 |
| 1  | 3.420073  | -0.913477 | -0.836014 |
| 6  | -0.645904 | 0.040394  | 1.796196  |
| 1  | -1.343123 | -0.658747 | 2.267568  |
| 1  | 0.384592  | -0.259958 | 2.008663  |
| 1  | -0.822515 | 1.053773  | 2.169239  |
| 6  | 4.437206  | 1.639964  | -0.751893 |
| 1  | 4.748208  | 0.743865  | -1.298862 |
| 1  | 4.869321  | 2.493176  | -1.286771 |
| 6  | 5.002377  | 1.597503  | 0.685915  |
| 1  | 4.632100  | 0.702730  | 1.201699  |
| 1  | 4.676374  | 2.477681  | 1.243510  |
| 6  | 6.503930  | 1.572824  | 0.724900  |
| 8  | 7.236982  | 2.389862  | 1.216851  |
| 8  | 7.009374  | 0.467602  | 0.098342  |
| 1  | 7.975881  | 0.515075  | 0.179341  |
| 6  | 3.319349  | -3.684276 | -0.758169 |

|   |           |           |           |
|---|-----------|-----------|-----------|
| 1 | 3.833744  | -3.142760 | -1.559049 |
| 1 | 3.265946  | -4.726129 | -1.087886 |
| 6 | 4.186204  | -3.636469 | 0.522835  |
| 1 | 3.592496  | -3.884399 | 1.404685  |
| 1 | 4.991863  | -4.374379 | 0.428491  |
| 6 | 4.853050  | -2.303078 | 0.764764  |
| 8 | 4.743922  | -1.629121 | 1.764205  |
| 8 | 5.619249  | -1.943598 | -0.279096 |
| 1 | 6.069124  | -1.100253 | -0.061761 |
| 6 | 0.634370  | -5.393458 | -0.300649 |
| 1 | 1.590212  | -5.908595 | -0.427459 |
| 1 | 0.227097  | -5.692697 | 0.672418  |
| 1 | -0.049894 | -5.768420 | -1.070947 |
| 6 | 2.666578  | 4.321344  | -0.649681 |
| 1 | 2.427785  | 4.824539  | 0.294921  |
| 1 | 3.748492  | 4.388722  | -0.794352 |
| 1 | 2.186686  | 4.891970  | -1.453250 |
| 6 | -4.560357 | -4.298613 | 0.178648  |
| 1 | -3.994631 | -4.923603 | -0.520489 |
| 1 | -4.445554 | -4.735861 | 1.178381  |
| 1 | -5.618569 | -4.363023 | -0.091090 |
| 6 | -5.235387 | 3.643410  | 0.198756  |
| 1 | -5.871233 | 3.275200  | -0.615019 |
| 1 | -5.666128 | 3.282559  | 1.140373  |
| 1 | -5.297225 | 4.734696  | 0.207808  |
| 6 | -6.293601 | -1.587791 | 0.295198  |
| 6 | -7.094645 | -2.355279 | 1.039484  |
| 1 | -6.742099 | -0.780096 | -0.282804 |
| 1 | -8.168445 | -2.195723 | 1.054677  |
| 1 | -6.705821 | -3.148684 | 1.671325  |
| 6 | -2.602454 | 5.397333  | 0.027834  |
| 6 | -1.696531 | 6.102365  | 0.710690  |
| 1 | -3.375018 | 5.939176  | -0.517147 |
| 1 | -1.712419 | 7.187934  | 0.705730  |
| 1 | -0.929860 | 5.623510  | 1.313662  |

-----  
 $\omega$  -**B**<sub>Ir(Me)</sub>  
 -----

Number of imaginary frequencies: 0    Electronic energy:    HF=-2740.251031  
 Zero-point correction=                    0.870200 (Hartree/Particle)  
 Thermal correction to Energy=            0.928321  
 Thermal correction to Enthalpy=         0.929265  
 Thermal correction to Gibbs Free Energy= 0.775762  
 Sum of electronic and zero-point Energies= -2739.380831  
 Sum of electronic and thermal Energies= -2739.322710  
 Sum of electronic and thermal Enthalpies= -2739.321766  
 Sum of electronic and thermal Free Energies= -2739.475269

.....  
 Cartesian Coordinates  
 .....

|    |           |           |           |
|----|-----------|-----------|-----------|
| 6  | 3.766197  | -3.115576 | -1.364544 |
| 6  | 3.510126  | -1.726794 | -1.067904 |
| 7  | 2.163685  | -1.516591 | -0.943444 |
| 6  | 1.547660  | -2.714812 | -1.171905 |
| 6  | 2.550656  | -3.741923 | -1.392256 |
| 6  | 4.491963  | -0.765881 | -0.865652 |
| 6  | 4.295041  | 0.547295  | -0.473885 |
| 7  | 3.076667  | 1.131630  | -0.267613 |
| 6  | 3.312233  | 2.426603  | 0.100712  |
| 6  | 4.736905  | 2.677987  | 0.148216  |
| 6  | 5.350909  | 1.512634  | -0.220291 |
| 6  | 2.329605  | 3.361121  | 0.393335  |
| 6  | 0.960285  | 3.158648  | 0.360180  |
| 7  | 0.341724  | 1.993888  | 0.007079  |
| 6  | -1.003431 | 2.209744  | 0.118725  |
| 6  | -1.248892 | 3.561699  | 0.587169  |
| 6  | -0.029704 | 4.152287  | 0.724883  |
| 77 | 1.253882  | 0.258230  | -0.521622 |
| 7  | -0.561802 | -0.630593 | -0.716556 |
| 6  | -1.777230 | -0.026551 | -0.592853 |
| 6  | -2.828429 | -0.972504 | -0.904279 |
| 6  | -2.222240 | -2.157853 | -1.189474 |
| 6  | -0.796814 | -1.930725 | -1.069265 |
| 6  | -1.982404 | 1.278837  | -0.175019 |
| 6  | 0.176111  | -2.895416 | -1.264057 |
| 8  | -3.662040 | -2.676966 | 1.927115  |
| 6  | -2.961166 | -1.564474 | 2.232185  |
| 8  | -3.485890 | -0.490949 | 2.450107  |
| 6  | -1.517190 | -1.835288 | 2.266455  |
| 7  | -1.231578 | -3.083695 | 1.957230  |
| 7  | -1.090179 | -4.170478 | 1.686165  |
| 6  | -0.461833 | -0.842411 | 2.551142  |
| 6  | -0.791816 | 0.450051  | 2.966879  |
| 6  | 0.188494  | 1.406799  | 3.217721  |
| 6  | 1.526346  | 1.094743  | 3.045065  |
| 6  | 1.889214  | -0.187051 | 2.634252  |
| 6  | 0.911041  | -1.155241 | 2.405213  |
| 8  | 1.198266  | -2.430731 | 2.049643  |
| 6  | 2.541722  | -2.862540 | 2.064910  |
| 1  | -0.165749 | -3.890146 | -1.525959 |
| 1  | -3.011112 | 1.584706  | -0.028606 |
| 1  | 2.667151  | 4.352882  | 0.676667  |
| 1  | 5.518361  | -1.083637 | -1.018273 |
| 1  | -1.835556 | 0.709923  | 3.073821  |
| 1  | -0.110215 | 2.405572  | 3.518686  |
| 1  | 2.935964  | -0.427481 | 2.492536  |
| 1  | 2.298264  | 1.840902  | 3.202106  |
| 1  | 2.521302  | -3.904792 | 1.743686  |
| 1  | 3.157377  | -2.288528 | 1.366041  |
| 1  | 2.962415  | -2.789224 | 3.076075  |

|   |           |           |           |
|---|-----------|-----------|-----------|
| 6 | 1.204730  | 0.729060  | -2.509931 |
| 1 | 0.433002  | 1.486154  | -2.681364 |
| 1 | 2.182058  | 1.118973  | -2.812206 |
| 1 | 0.972261  | -0.171792 | -3.087053 |
| 6 | -5.089693 | -2.557308 | 1.943300  |
| 1 | -5.434840 | -3.348339 | 1.273479  |
| 1 | -5.373894 | -1.585945 | 1.533417  |
| 6 | -5.638428 | -2.735936 | 3.347405  |
| 1 | -5.292191 | -1.926453 | 3.995454  |
| 1 | -6.732973 | -2.715104 | 3.324912  |
| 1 | -5.317591 | -3.692916 | 3.769620  |
| 6 | 5.127525  | -3.715349 | -1.523356 |
| 1 | 5.067658  | -4.780080 | -1.763418 |
| 1 | 5.690340  | -3.220953 | -2.323768 |
| 1 | 5.716349  | -3.619271 | -0.602825 |
| 6 | 5.363286  | 3.967961  | 0.571719  |
| 1 | 6.393220  | 3.804789  | 0.902647  |
| 1 | 5.389924  | 4.695724  | -0.248896 |
| 1 | 4.810866  | 4.426769  | 1.398749  |
| 6 | 2.308708  | -5.176276 | -1.561602 |
| 6 | 1.400721  | -5.893726 | -0.892610 |
| 1 | 2.955963  | -5.690559 | -2.271372 |
| 1 | 1.291350  | -6.959486 | -1.069190 |
| 1 | 0.753144  | -5.450197 | -0.140575 |
| 6 | 6.779499  | 1.215712  | -0.316086 |
| 6 | 7.722632  | 2.061946  | -0.739709 |
| 1 | 7.084037  | 0.214205  | -0.012681 |
| 1 | 8.768262  | 1.770490  | -0.761814 |
| 1 | 7.481913  | 3.058737  | -1.097818 |
| 6 | -2.844682 | -3.471976 | -1.537482 |
| 1 | -3.935349 | -3.398818 | -1.573554 |
| 1 | -2.502940 | -3.833752 | -2.514105 |
| 1 | -2.587111 | -4.235449 | -0.793984 |
| 6 | -4.281044 | -0.625324 | -0.984018 |
| 1 | -4.889438 | -1.526842 | -0.850877 |
| 1 | -4.559719 | 0.060951  | -0.177198 |
| 6 | -2.593692 | 4.165349  | 0.866433  |
| 1 | -2.455986 | 5.022826  | 1.532174  |
| 1 | -3.227725 | 3.458651  | 1.412525  |
| 6 | -3.350448 | 4.655887  | -0.390714 |
| 1 | -2.661700 | 5.099903  | -1.112142 |
| 1 | -4.073718 | 5.421512  | -0.085627 |
| 6 | -4.611248 | 0.013400  | -2.349771 |
| 1 | -4.007047 | 0.917792  | -2.490981 |
| 1 | -4.385816 | -0.683051 | -3.160148 |
| 6 | -4.141465 | 3.576857  | -1.095906 |
| 8 | -4.017447 | 3.271750  | -2.263046 |
| 8 | -5.019319 | 2.996698  | -0.270495 |
| 1 | -5.560154 | 2.341071  | -0.775002 |
| 6 | -6.045904 | 0.445295  | -2.424511 |

|   |           |           |           |
|---|-----------|-----------|-----------|
| 8 | -6.585094 | 1.216374  | -1.648411 |
| 8 | -6.727662 | -0.107043 | -3.430495 |
| 1 | -7.628077 | 0.257314  | -3.393092 |
| 6 | 0.303581  | 5.542134  | 1.167557  |
| 1 | 0.839192  | 6.090260  | 0.383275  |
| 1 | -0.595721 | 6.114230  | 1.410558  |
| 1 | 0.944584  | 5.535860  | 2.057378  |

-----  
 **$\omega$  -TS(B-C)<sub>Ir(Me)</sub>**  
 -----

Number of imaginary frequencies: 1    Electronic energy:    HF=-2740.2119109  
 Zero-point correction=                    0.866483 (Hartree/Particle)  
 Thermal correction to Energy=            0.924401  
 Thermal correction to Enthalpy=         0.925345  
 Thermal correction to Gibbs Free Energy=    0.774438  
 Sum of electronic and zero-point Energies=    -2739.345428  
 Sum of electronic and thermal Energies=    -2739.287510  
 Sum of electronic and thermal Enthalpies=   -2739.286566  
 Sum of electronic and thermal Free Energies=   -2739.437473

-----  
 Cartesian Coordinates  
 -----

|    |           |           |           |
|----|-----------|-----------|-----------|
| 6  | 3.382166  | -3.411032 | -1.017923 |
| 6  | 2.089474  | -2.846771 | -0.695447 |
| 7  | 2.144121  | -1.482341 | -0.777987 |
| 6  | 3.404039  | -1.153806 | -1.184685 |
| 6  | 4.198292  | -2.360386 | -1.335761 |
| 6  | 0.952713  | -3.587443 | -0.409736 |
| 6  | -0.323133 | -3.096072 | -0.172924 |
| 7  | -0.664850 | -1.778880 | -0.128929 |
| 6  | -2.009436 | -1.714649 | 0.093012  |
| 6  | -2.544134 | -3.057060 | 0.227809  |
| 6  | -1.496441 | -3.913890 | 0.054160  |
| 6  | -2.749598 | -0.544389 | 0.168185  |
| 6  | -2.283282 | 0.749213  | -0.014504 |
| 7  | -0.991737 | 1.091998  | -0.278297 |
| 6  | -0.949608 | 2.442486  | -0.432116 |
| 6  | -2.271200 | 2.997379  | -0.235325 |
| 6  | -3.100075 | 1.947045  | 0.020881  |
| 6  | 0.178770  | 3.186943  | -0.744697 |
| 6  | 1.454900  | 2.699287  | -0.974090 |
| 7  | 1.809244  | 1.384026  | -0.945570 |
| 6  | 3.106041  | 1.300306  | -1.351998 |
| 6  | 3.616569  | 2.622308  | -1.637171 |
| 6  | 2.605662  | 3.500661  | -1.366601 |
| 77 | 0.595120  | -0.191628 | -0.466928 |
| 6  | 3.846265  | 0.131650  | -1.456177 |
| 1  | 0.042241  | 4.256419  | -0.851775 |
| 1  | 4.865953  | 0.232737  | -1.813372 |
| 1  | 1.062588  | -4.667411 | -0.414459 |

|   |           |           |           |
|---|-----------|-----------|-----------|
| 1 | -3.803442 | -0.651253 | 0.396814  |
| 6 | 0.908308  | 0.114029  | 1.692175  |
| 6 | 0.973193  | 1.511897  | 2.209278  |
| 6 | -0.207602 | 2.123830  | 2.649777  |
| 6 | 2.130136  | 2.318278  | 2.111863  |
| 6 | -0.254384 | 3.476660  | 2.970651  |
| 1 | -1.110363 | 1.531418  | 2.700283  |
| 6 | 2.091525  | 3.662856  | 2.475122  |
| 6 | 0.897085  | 4.244338  | 2.890725  |
| 1 | -1.195136 | 3.916939  | 3.285043  |
| 1 | 2.985100  | 4.271478  | 2.408059  |
| 1 | 0.880060  | 5.298998  | 3.150468  |
| 6 | 0.055710  | -0.840533 | 2.498220  |
| 8 | -1.084782 | -0.589237 | 2.820633  |
| 8 | 0.630227  | -2.024514 | 2.716074  |
| 8 | 3.256650  | 1.710008  | 1.677613  |
| 6 | 4.455407  | 2.446538  | 1.600269  |
| 1 | 5.194248  | 1.756404  | 1.189861  |
| 1 | 4.350655  | 3.304222  | 0.926357  |
| 1 | 4.778982  | 2.787213  | 2.592134  |
| 7 | 3.406436  | -1.286277 | 1.817860  |
| 7 | 2.561861  | -0.630558 | 2.096201  |
| 6 | 0.057457  | -0.346700 | -2.482963 |
| 1 | -1.024389 | -0.498536 | -2.575136 |
| 1 | 0.328110  | 0.567741  | -3.024448 |
| 1 | 0.568511  | -1.197302 | -2.950229 |
| 6 | -4.589398 | 1.978082  | 0.174354  |
| 1 | -4.935957 | 1.153197  | 0.805174  |
| 1 | -4.893713 | 2.902035  | 0.679448  |
| 6 | -5.273134 | 1.903135  | -1.209520 |
| 1 | -5.028274 | 0.947608  | -1.689752 |
| 1 | -4.915958 | 2.712563  | -1.849113 |
| 6 | -6.768447 | 2.019762  | -1.130319 |
| 8 | -7.463632 | 2.874433  | -1.613782 |
| 8 | -7.318687 | 1.004839  | -0.397342 |
| 1 | -8.280075 | 1.140596  | -0.406482 |
| 6 | -3.975289 | -3.416375 | 0.497980  |
| 1 | -4.392060 | -2.780189 | 1.285845  |
| 1 | -4.007997 | -4.437995 | 0.888597  |
| 6 | -4.895843 | -3.353886 | -0.744043 |
| 1 | -4.369140 | -3.690842 | -1.638836 |
| 1 | -5.753943 | -4.016634 | -0.578484 |
| 6 | -5.466421 | -1.983556 | -1.024107 |
| 8 | -5.382178 | -1.385076 | -2.072560 |
| 8 | -6.119111 | -1.496654 | 0.044971  |
| 1 | -6.510086 | -0.630604 | -0.195674 |
| 6 | -1.485397 | -5.410332 | 0.075070  |
| 1 | -2.480817 | -5.818641 | 0.269266  |
| 1 | -1.145624 | -5.817519 | -0.884471 |
| 1 | -0.812057 | -5.796835 | 0.849988  |



|   |           |           |           |
|---|-----------|-----------|-----------|
| 6 | -2.597377 | 4.454330  | -0.318603 |
| 1 | -2.401911 | 4.852423  | -1.321272 |
| 1 | -3.649593 | 4.643716  | -0.087499 |
| 1 | -1.989029 | 5.032169  | 0.387651  |
| 6 | 3.715852  | -4.867177 | -0.958501 |
| 1 | 3.221651  | -5.353484 | -0.110504 |
| 1 | 3.403690  | -5.394508 | -1.868653 |
| 1 | 4.795023  | -5.009119 | -0.847808 |
| 6 | 5.014250  | 2.917858  | -2.080281 |
| 1 | 5.748225  | 2.594597  | -1.331162 |
| 1 | 5.254649  | 2.398248  | -3.014994 |
| 1 | 5.163207  | 3.988586  | -2.242995 |
| 6 | 5.609932  | -2.374179 | -1.715842 |
| 6 | 6.203620  | -3.303591 | -2.469942 |
| 1 | 6.215355  | -1.548524 | -1.342301 |
| 1 | 7.265762  | -3.253098 | -2.689369 |
| 1 | 5.648931  | -4.127266 | -2.909980 |
| 6 | 2.679969  | 4.961632  | -1.432881 |
| 6 | 2.129657  | 5.809746  | -0.558427 |
| 1 | 3.265512  | 5.372771  | -2.254816 |
| 1 | 2.240112  | 6.883431  | -0.677785 |
| 1 | 1.570850  | 5.459656  | 0.305277  |
| 6 | -0.217430 | -3.042609 | 3.269199  |
| 1 | -0.522173 | -2.742254 | 4.276543  |
| 1 | -1.113492 | -3.125284 | 2.649045  |
| 6 | 0.585157  | -4.325758 | 3.272248  |
| 1 | 1.475397  | -4.232969 | 3.901565  |
| 1 | -0.028399 | -5.146670 | 3.656852  |
| 1 | 0.904038  | -4.569355 | 2.254428  |

---

$\omega$  -C<sub>Ir</sub>(Me)

---

Number of imaginary frequencies: 0    Electronic energy:    HF=-2740.2371944  
Zero-point correction=                    0.865609 (Hartree/Particle)  
Thermal correction to Energy=            0.925299  
Thermal correction to Enthalpy=         0.926243  
Thermal correction to Gibbs Free Energy= 0.769338  
Sum of electronic and zero-point Energies= -2739.371585  
Sum of electronic and thermal Energies= -2739.311895  
Sum of electronic and thermal Enthalpies= -2739.310951  
Sum of electronic and thermal Free Energies= -2739.467856

---

Cartesian Coordinates

---

|   |          |           |           |
|---|----------|-----------|-----------|
| 6 | 3.209476 | -3.200208 | -1.409501 |
| 6 | 1.942514 | -2.662208 | -0.964600 |
| 7 | 1.974892 | -1.300821 | -1.028864 |
| 6 | 3.187371 | -0.938755 | -1.530857 |
| 6 | 3.978018 | -2.130474 | -1.783952 |
| 6 | 0.848794 | -3.424513 | -0.578238 |

|    |           |           |           |
|----|-----------|-----------|-----------|
| 6  | -0.415654 | -2.954196 | -0.253887 |
| 7  | -0.775404 | -1.644935 | -0.190232 |
| 6  | -2.111409 | -1.596340 | 0.082200  |
| 6  | -2.621890 | -2.948729 | 0.229388  |
| 6  | -1.568710 | -3.789331 | 0.018047  |
| 6  | -2.863131 | -0.437097 | 0.192768  |
| 6  | -2.405949 | 0.868348  | 0.066274  |
| 7  | -1.118183 | 1.231369  | -0.165472 |
| 6  | -1.060541 | 2.590274  | -0.176664 |
| 6  | -2.385423 | 3.127635  | 0.048769  |
| 6  | -3.220629 | 2.059081  | 0.191998  |
| 6  | 0.080492  | 3.350109  | -0.398430 |
| 6  | 1.343662  | 2.879817  | -0.727752 |
| 7  | 1.669718  | 1.569491  | -0.899545 |
| 6  | 2.923063  | 1.521939  | -1.426529 |
| 6  | 3.448281  | 2.861741  | -1.556875 |
| 6  | 2.485052  | 3.708597  | -1.084217 |
| 77 | 0.469207  | -0.042235 | -0.487914 |
| 6  | 3.611042  | 0.361522  | -1.755112 |
| 1  | -0.039133 | 4.427086  | -0.369192 |
| 1  | 4.591925  | 0.488679  | -2.201342 |
| 1  | 0.979101  | -4.501652 | -0.588961 |
| 1  | -3.911764 | -0.559286 | 0.436065  |
| 6  | 0.809008  | 0.156146  | 1.484391  |
| 6  | 1.570058  | 1.233698  | 2.108235  |
| 6  | 0.895062  | 2.255579  | 2.789977  |
| 6  | 2.961594  | 1.359809  | 1.890842  |
| 6  | 1.557850  | 3.419856  | 3.163181  |
| 1  | -0.169923 | 2.142848  | 2.962591  |
| 6  | 3.625464  | 2.521153  | 2.277033  |
| 6  | 2.915164  | 3.550214  | 2.893521  |
| 1  | 1.015172  | 4.218401  | 3.658892  |
| 1  | 4.687719  | 2.637627  | 2.098377  |
| 1  | 3.441655  | 4.457787  | 3.173720  |
| 6  | -0.153476 | -0.507637 | 2.413436  |
| 8  | -1.178461 | -0.012717 | 2.832197  |
| 8  | 0.251962  | -1.748405 | 2.683598  |
| 8  | 3.563071  | 0.282083  | 1.352137  |
| 6  | 4.957271  | 0.309289  | 1.160290  |
| 1  | 5.212774  | -0.656982 | 0.723604  |
| 1  | 5.248852  | 1.106345  | 0.464960  |
| 1  | 5.485406  | 0.436835  | 2.113624  |
| 7  | 3.250765  | -3.122977 | 1.939421  |
| 7  | 3.232767  | -2.324349 | 2.697762  |
| 6  | -0.173070 | 0.031442  | -2.512848 |
| 1  | -1.176442 | -0.397835 | -2.622672 |
| 1  | -0.197472 | 1.066924  | -2.873448 |
| 1  | 0.518703  | -0.536505 | -3.148083 |
| 6  | -4.711981 | 2.068822  | 0.323318  |
| 1  | -5.054379 | 1.233842  | 0.943437  |

|   |           |           |           |
|---|-----------|-----------|-----------|
| 1 | -5.036738 | 2.983865  | 0.831037  |
| 6 | -5.374794 | 1.993278  | -1.070700 |
| 1 | -5.113446 | 1.043423  | -1.553814 |
| 1 | -5.017511 | 2.809540  | -1.701502 |
| 6 | -6.872546 | 2.092347  | -1.013347 |
| 8 | -7.570495 | 2.935550  | -1.512351 |
| 8 | -7.421604 | 1.075314  | -0.282128 |
| 1 | -8.384296 | 1.199571  | -0.307576 |
| 6 | -4.039882 | -3.327773 | 0.539564  |
| 1 | -4.443172 | -2.699594 | 1.341021  |
| 1 | -4.047990 | -4.351205 | 0.926664  |
| 6 | -4.996340 | -3.272458 | -0.675524 |
| 1 | -4.493328 | -3.608236 | -1.584272 |
| 1 | -5.845556 | -3.939345 | -0.483644 |
| 6 | -5.579994 | -1.904328 | -0.940423 |
| 8 | -5.517232 | -1.300514 | -1.987115 |
| 8 | -6.214460 | -1.424804 | 0.143045  |
| 1 | -6.611892 | -0.558551 | -0.086959 |
| 6 | -1.542662 | -5.285648 | 0.010210  |
| 1 | -2.508556 | -5.707554 | 0.300593  |
| 1 | -1.302689 | -5.670126 | -0.988206 |
| 1 | -0.788623 | -5.681066 | 0.700995  |
| 6 | -2.715432 | 4.586564  | 0.070116  |
| 1 | -2.522158 | 5.052134  | -0.903454 |
| 1 | -3.768069 | 4.755374  | 0.313846  |
| 1 | -2.111853 | 5.121156  | 0.812951  |
| 6 | 3.571302  | -4.650023 | -1.391429 |
| 1 | 3.172448  | -5.143086 | -0.498881 |
| 1 | 3.179125  | -5.179381 | -2.268781 |
| 1 | 4.658191  | -4.774258 | -1.387998 |
| 6 | 4.814358  | 3.196864  | -2.065917 |
| 1 | 5.598009  | 2.771637  | -1.425972 |
| 1 | 4.971560  | 2.803813  | -3.077125 |
| 1 | 4.972295  | 4.278082  | -2.097141 |
| 6 | 5.348165  | -2.115939 | -2.293943 |
| 6 | 5.889440  | -3.032607 | -3.101376 |
| 1 | 5.968879  | -1.276241 | -1.980997 |
| 1 | 6.924751  | -2.957810 | -3.419515 |
| 1 | 5.314688  | -3.868689 | -3.488853 |
| 6 | 2.582229  | 5.163011  | -0.950583 |
| 6 | 2.112093  | 5.874669  | 0.077982  |
| 1 | 3.107517  | 5.685458  | -1.749576 |
| 1 | 2.225405  | 6.954170  | 0.110557  |
| 1 | 1.624986  | 5.398176  | 0.924536  |
| 6 | -0.666882 | -2.573525 | 3.414184  |
| 1 | -0.821304 | -2.148676 | 4.410886  |
| 1 | -1.625194 | -2.571490 | 2.886630  |
| 6 | -0.061026 | -3.959304 | 3.467332  |
| 1 | 0.884583  | -3.953370 | 4.017328  |
| 1 | -0.749147 | -4.650689 | 3.963785  |

1 0.131442 -4.319807 2.452615

---

$\omega$  -TS(C-P)<sub>IR(Me)</sub>

---

Number of imaginary frequencies: 1    Electronic energy:    HF=-2630.8045366  
Zero-point correction=                    0.854123 (Hartree/Particle)  
Thermal correction to Energy=            0.909102  
Thermal correction to Enthalpy=         0.910046  
Thermal correction to Gibbs Free Energy= 0.764742  
Sum of electronic and zero-point Energies= -2629.950414  
Sum of electronic and thermal Energies= -2629.895435  
Sum of electronic and thermal Enthalpies= -2629.894491  
Sum of electronic and thermal Free Energies= -2630.039794

---

Cartesian Coordinates

---

6 3.511580 -3.248880 -1.120076  
6 2.191928 -2.729308 -0.837079  
7 2.214732 -1.362857 -0.877440  
6 3.484332 -0.985307 -1.199949  
6 4.317338 -2.165986 -1.354233  
6 1.071102 -3.502525 -0.573246  
6 -0.208400 -3.045032 -0.291714  
7 -0.585905 -1.737771 -0.232761  
6 -1.910003 -1.709296 0.089765  
6 -2.394978 -3.065688 0.270567  
6 -1.340806 -3.893573 0.019329  
6 -2.676376 -0.559023 0.203195  
6 -2.257751 0.745139 -0.019201  
7 -0.984127 1.123341 -0.320411  
6 -0.981418 2.475886 -0.466619  
6 -2.316905 2.991616 -0.253998  
6 -3.108257 1.918945 0.029757  
6 0.135815 3.259178 -0.721871  
6 1.437304 2.814708 -0.881764  
7 1.817490 1.505943 -0.914827  
6 3.148029 1.473798 -1.208014  
6 3.653881 2.822880 -1.335853  
6 2.600274 3.660964 -1.110128  
77 0.617939 -0.116310 -0.561924  
6 3.915563 0.325930 -1.349144  
1 -0.022408 4.328411 -0.795637  
1 4.956831 0.471840 -1.615029  
1 1.206693 -4.578861 -0.590685  
1 -3.713214 -0.692809 0.488225  
6 0.111788 -0.213573 -2.586773  
1 -0.959976 -0.411634 -2.701669  
1 0.345613 0.732244 -3.088728  
1 0.666783 -1.018525 -3.082419  
6 -4.593265 1.902626 0.219458

|   |           |           |           |
|---|-----------|-----------|-----------|
| 1 | -4.891781 | 1.089093  | 0.887594  |
| 1 | -4.917606 | 2.831528  | 0.700659  |
| 6 | -5.309169 | 1.752792  | -1.140718 |
| 1 | -5.042153 | 0.790317  | -1.593809 |
| 1 | -5.001872 | 2.549861  | -1.819298 |
| 6 | -6.805639 | 1.809218  | -1.032466 |
| 8 | -7.549381 | 2.586752  | -1.570681 |
| 8 | -7.294218 | 0.836572  | -0.205251 |
| 1 | -8.257052 | 0.926034  | -0.208132 |
| 6 | -3.791161 | -3.462143 | 0.647867  |
| 1 | -4.172468 | -2.819220 | 1.447050  |
| 1 | -3.763270 | -4.473281 | 1.063292  |
| 6 | -4.794766 | -3.458246 | -0.528554 |
| 1 | -4.323714 | -3.812887 | -1.446368 |
| 1 | -5.625724 | -4.130049 | -0.284612 |
| 6 | -5.413438 | -2.110248 | -0.812650 |
| 8 | -5.417524 | -1.549910 | -1.885523 |
| 8 | -5.999021 | -1.596930 | 0.281460  |
| 1 | -6.431071 | -0.754674 | 0.038493  |
| 6 | -1.284779 | -5.388011 | 0.049554  |
| 1 | -2.250660 | -5.822340 | 0.316781  |
| 1 | -1.001189 | -5.793537 | -0.927614 |
| 1 | -0.547149 | -5.745863 | 0.777165  |
| 6 | -2.691620 | 4.435880  | -0.348443 |
| 1 | -2.517628 | 4.826984  | -1.356516 |
| 1 | -3.746529 | 4.592183  | -0.110337 |
| 1 | -2.098213 | 5.043886  | 0.343563  |
| 6 | 3.881572  | -4.696945 | -1.104880 |
| 1 | 3.345386  | -5.236178 | -0.318136 |
| 1 | 3.646185  | -5.185529 | -2.057409 |
| 1 | 4.953754  | -4.817105 | -0.928560 |
| 6 | 5.081953  | 3.172802  | -1.603794 |
| 1 | 5.732520  | 2.810682  | -0.799963 |
| 1 | 5.434115  | 2.724777  | -2.539247 |
| 1 | 5.218715  | 4.253905  | -1.675490 |
| 6 | 5.745348  | -2.131262 | -1.665492 |
| 6 | 6.405054  | -3.028163 | -2.403554 |
| 1 | 6.306393  | -1.292605 | -1.254266 |
| 1 | 7.473315  | -2.937618 | -2.570428 |
| 1 | 5.899814  | -3.860790 | -2.882635 |
| 6 | 2.636904  | 5.124586  | -1.079253 |
| 6 | 1.988240  | 5.899016  | -0.205341 |
| 1 | 3.274340  | 5.601368  | -1.822972 |
| 1 | 2.072147  | 6.980177  | -0.248743 |
| 1 | 1.379730  | 5.475573  | 0.588482  |
| 6 | 1.091944  | 0.059616  | 1.590698  |
| 6 | 1.138666  | 1.415391  | 2.174917  |
| 6 | 0.507716  | -1.024233 | 2.414314  |
| 6 | -0.004109 | 2.143306  | 2.500838  |
| 6 | 2.381868  | 2.038671  | 2.313235  |

|   |           |           |          |
|---|-----------|-----------|----------|
| 8 | -0.587443 | -0.921392 | 2.921923 |
| 8 | 1.263531  | -2.131401 | 2.434947 |
| 6 | 0.112706  | 3.463287  | 2.930877 |
| 1 | -0.973944 | 1.671186  | 2.400272 |
| 6 | 2.515899  | 3.351392  | 2.720919 |
| 8 | 3.496382  | 1.297484  | 1.969055 |
| 6 | 1.361025  | 4.069705  | 3.028653 |
| 1 | -0.783906 | 4.018637  | 3.185597 |
| 1 | 3.503072  | 3.792113  | 2.795594 |
| 6 | 3.266315  | -0.042673 | 2.060744 |
| 1 | 1.445291  | 5.100833  | 3.355892 |
| 1 | 3.100186  | -0.430218 | 3.067279 |
| 1 | 3.992040  | -0.608232 | 1.474834 |
| 1 | 2.293524  | -0.319871 | 1.321506 |
| 6 | 0.645591  | -3.314032 | 2.970291 |
| 1 | -0.403054 | -3.326630 | 2.662822 |
| 1 | 1.170543  | -4.134847 | 2.477110 |
| 6 | 0.786328  | -3.375401 | 4.478961 |
| 1 | 0.240358  | -2.552023 | 4.944215 |
| 1 | 0.374689  | -4.317661 | 4.852316 |
| 1 | 1.837945  | -3.319515 | 4.773975 |

-----  
 $\omega$  -<sup>5</sup>A<sub>Fe(his)</sub>  
 -----

Number of imaginary frequencies: 1    Electronic energy:    HF=-2183.9142918  
 Zero-point correction=                    0.676437 (Hartree/Particle)  
 Thermal correction to Energy=            0.721804  
 Thermal correction to Enthalpy=         0.722749  
 Thermal correction to Gibbs Free Energy=    0.591105  
 Sum of electronic and zero-point Energies=    -2183.237855  
 Sum of electronic and thermal Energies=    -2183.192487  
 Sum of electronic and thermal Enthalpies=   -2183.191543  
 Sum of electronic and thermal Free Energies=   -2183.323187

-----  
 Cartesian Coordinates  
 -----

|   |           |           |           |
|---|-----------|-----------|-----------|
| 6 | -1.642063 | -3.449653 | -0.670214 |
| 6 | -0.344663 | -2.795661 | -0.638072 |
| 7 | -0.514756 | -1.448141 | -0.497489 |
| 6 | -1.851171 | -1.210238 | -0.427454 |
| 6 | -2.578750 | -2.464174 | -0.545000 |
| 6 | 0.881422  | -3.449152 | -0.730950 |
| 6 | 2.158715  | -2.876856 | -0.721219 |
| 7 | 2.411227  | -1.549973 | -0.570358 |
| 6 | 3.755910  | -1.370545 | -0.659273 |
| 6 | 4.404529  | -2.661044 | -0.876133 |
| 6 | 3.403863  | -3.598698 | -0.892284 |
| 6 | 4.394628  | -0.138170 | -0.513002 |
| 6 | 3.807080  | 1.120176  | -0.361653 |
| 7 | 2.464453  | 1.365985  | -0.313440 |

|   |           |           |           |
|---|-----------|-----------|-----------|
| 6 | 2.297232  | 2.703052  | -0.148912 |
| 6 | 3.595477  | 3.355497  | -0.099504 |
| 6 | 4.537561  | 2.364181  | -0.236121 |
| 6 | 1.062400  | 3.353116  | -0.015250 |
| 6 | -0.203743 | 2.778432  | -0.028060 |
| 7 | -0.450300 | 1.443310  | -0.126617 |
| 6 | -1.796437 | 1.276953  | -0.141277 |
| 6 | -2.456054 | 2.574057  | -0.022229 |
| 6 | -1.465546 | 3.507715  | 0.045669  |
| 6 | -1.584825 | 4.995896  | 0.145315  |
| 6 | -3.939619 | 2.780502  | -0.044903 |
| 6 | -4.500693 | 2.715817  | -1.468557 |
| 6 | -6.002023 | 2.852791  | -1.505417 |
| 8 | -6.725539 | 2.981101  | -0.546129 |
| 6 | -2.441813 | 0.046382  | -0.261966 |
| 6 | 6.025264  | 2.505880  | -0.303232 |
| 6 | 3.796353  | 4.797513  | 0.034166  |
| 6 | 4.804711  | 5.391818  | 0.679420  |
| 6 | 3.518638  | -5.074456 | -1.113433 |
| 6 | 5.834639  | -2.914680 | -1.065363 |
| 6 | 6.682894  | -2.154226 | -1.763870 |
| 6 | -4.069724 | -2.597937 | -0.478238 |
| 6 | -4.579178 | -2.545818 | 0.965165  |
| 6 | -6.082166 | -2.631188 | 1.054061  |
| 8 | -6.842811 | -2.735784 | 0.121472  |
| 6 | -1.851455 | -4.924889 | -0.811450 |
| 8 | -6.475315 | 2.813227  | -2.766268 |
| 8 | -6.509733 | -2.576342 | 2.331387  |
| 1 | 1.098033  | 4.431684  | 0.107418  |
| 1 | -3.528062 | 0.066819  | -0.239673 |
| 1 | 0.841032  | -4.529180 | -0.845646 |
| 1 | 5.479007  | -0.162925 | -0.517945 |
| 1 | 6.464861  | 1.779755  | -0.994879 |
| 1 | 6.301393  | 3.508679  | -0.644069 |
| 1 | 6.494437  | 2.350379  | 0.676545  |
| 1 | 4.563460  | -5.395641 | -1.143604 |
| 1 | 3.014967  | -5.639482 | -0.320047 |
| 1 | 3.058470  | -5.368663 | -2.064457 |
| 1 | -1.395656 | -5.305699 | -1.732959 |
| 1 | -1.401375 | -5.472981 | 0.025063  |
| 1 | -2.914900 | -5.178633 | -0.838631 |
| 1 | -2.627915 | 5.309470  | 0.245009  |
| 1 | -1.036458 | 5.383602  | 1.012027  |
| 1 | -1.174108 | 5.487111  | -0.745011 |
| 1 | 3.047419  | 5.430853  | -0.440911 |
| 1 | 4.887731  | 6.473941  | 0.712832  |
| 1 | 5.563657  | 4.824428  | 1.210233  |
| 1 | 6.219559  | -3.827305 | -0.609746 |
| 1 | 7.731035  | -2.423016 | -1.854028 |
| 1 | 6.355924  | -1.260531 | -2.287918 |

|    |           |           |           |
|----|-----------|-----------|-----------|
| 1  | -4.442842 | 2.026439  | 0.570787  |
| 1  | -4.201551 | 3.745829  | 0.399553  |
| 1  | -4.064521 | 3.502346  | -2.095621 |
| 1  | -4.230893 | 1.770117  | -1.954238 |
| 1  | -7.440059 | 2.896528  | -2.696804 |
| 1  | -4.393653 | -3.536638 | -0.938143 |
| 1  | -4.554348 | -1.804487 | -1.057869 |
| 1  | -4.151228 | -3.363225 | 1.557896  |
| 1  | -4.257411 | -1.622747 | 1.462349  |
| 1  | -7.478466 | -2.629051 | 2.294677  |
| 7  | 1.136802  | -0.312387 | 2.031487  |
| 6  | 1.978143  | -1.111383 | 2.648597  |
| 6  | 0.446489  | 0.365091  | 3.006726  |
| 7  | 1.858383  | -0.978877 | 3.989048  |
| 1  | 2.672725  | -1.779394 | 2.160247  |
| 6  | 0.881883  | -0.037221 | 4.235845  |
| 1  | -0.307972 | 1.091818  | 2.744685  |
| 1  | 2.393273  | -1.477906 | 4.681497  |
| 1  | 0.599347  | 0.248861  | 5.236243  |
| 26 | 0.985930  | -0.073903 | -0.131483 |

---

$\omega$ -<sup>10</sup>SSC<sub>Fe(cys)</sub>

---

Number of imaginary frequencies: 0    Electronic energy:    HF=-3157.1760494  
Zero-point correction=                    0.863942 (Hartree/Particle)  
Thermal correction to Energy=            0.926258  
Thermal correction to Enthalpy=        0.927202  
Thermal correction to Gibbs Free Energy= 0.760961  
Sum of electronic and zero-point Energies= -3156.312108  
Sum of electronic and thermal Energies= -3156.249791  
Sum of electronic and thermal Enthalpies= -3156.248847  
Sum of electronic and thermal Free Energies= -3156.415088

---

Cartesian Coordinates

---

|    |           |           |           |
|----|-----------|-----------|-----------|
| 6  | -0.796161 | -3.793127 | 3.373636  |
| 6  | 0.445812  | -3.249245 | 3.078041  |
| 6  | 0.522210  | -2.017233 | 2.430221  |
| 6  | -0.624585 | -1.313453 | 2.054671  |
| 6  | -1.873084 | -1.850010 | 2.427848  |
| 6  | -1.959983 | -3.088372 | 3.062606  |
| 6  | -0.538237 | -0.084740 | 1.239866  |
| 8  | -2.951731 | -1.072619 | 2.145955  |
| 6  | -4.227542 | -1.578598 | 2.428872  |
| 26 | -0.572466 | -0.132703 | -0.717501 |
| 7  | -2.037698 | 1.228749  | -0.918893 |
| 6  | -1.919934 | 2.571800  | -1.051876 |
| 6  | -3.224516 | 3.183730  | -1.240692 |
| 6  | -4.131439 | 2.159223  | -1.224400 |
| 6  | -3.365749 | 0.946220  | -1.033705 |



|    |           |           |           |
|----|-----------|-----------|-----------|
| 6  | -0.722824 | 3.274667  | -1.054289 |
| 6  | 0.525359  | 2.707112  | -0.892429 |
| 7  | 0.770453  | 1.373887  | -0.770783 |
| 6  | 2.109330  | 1.247964  | -0.593325 |
| 6  | 2.744127  | 2.554652  | -0.565081 |
| 6  | 1.756004  | 3.465960  | -0.771593 |
| 6  | -3.935992 | -0.314719 | -0.995705 |
| 6  | -3.263027 | -1.514315 | -0.830417 |
| 7  | -1.916423 | -1.642981 | -0.727987 |
| 6  | -1.658115 | -2.973223 | -0.647182 |
| 6  | -2.882810 | -3.733411 | -0.673465 |
| 6  | -3.900448 | -2.824708 | -0.784306 |
| 6  | 2.794317  | 0.051567  | -0.459472 |
| 6  | 2.232253  | -1.215866 | -0.488023 |
| 7  | 0.910588  | -1.491180 | -0.599441 |
| 6  | 0.793113  | -2.844635 | -0.539160 |
| 6  | 2.097404  | -3.462912 | -0.396427 |
| 6  | 2.998958  | -2.445947 | -0.361640 |
| 6  | -0.395896 | -3.544435 | -0.561631 |
| 6  | 0.082448  | 1.054473  | 1.931272  |
| 8  | -0.666595 | 2.176590  | 1.887551  |
| 8  | 1.173556  | 1.038014  | 2.479374  |
| 1  | -0.341398 | -4.625869 | -0.490138 |
| 1  | -5.005701 | -0.372163 | -1.154349 |
| 1  | -0.768582 | 4.350514  | -1.190101 |
| 1  | 3.869646  | 0.110940  | -0.322716 |
| 1  | 1.486931  | -1.592648 | 2.175090  |
| 1  | 1.358160  | -3.782082 | 3.332265  |
| 1  | -2.925093 | -3.509999 | 3.321454  |
| 1  | -0.874144 | -4.760602 | 3.863715  |
| 1  | -4.931773 | -0.820213 | 2.081246  |
| 1  | -4.422196 | -2.515236 | 1.891755  |
| 1  | -4.370975 | -1.737610 | 3.508123  |
| 16 | -0.480854 | -0.399797 | -3.065211 |
| 6  | -0.296568 | 1.249732  | -3.810145 |
| 1  | -1.153514 | 1.892253  | -3.578581 |
| 1  | 0.611052  | 1.752652  | -3.458653 |
| 1  | -0.231757 | 1.141032  | -4.898681 |
| 6  | 1.840843  | 4.959717  | -0.801541 |
| 1  | 1.432479  | 5.365961  | -1.734856 |
| 1  | 1.271412  | 5.407948  | 0.023271  |
| 1  | 2.876595  | 5.302645  | -0.714903 |
| 6  | 2.326625  | -4.935968 | -0.277070 |
| 1  | 1.800943  | -5.341112 | 0.596573  |
| 1  | 1.957863  | -5.472494 | -1.159721 |
| 1  | 3.390021  | -5.169518 | -0.165880 |
| 6  | -5.622593 | 2.232463  | -1.302560 |
| 1  | -5.990559 | 2.034101  | -2.317555 |
| 1  | -6.088139 | 1.500116  | -0.634315 |
| 1  | -5.973891 | 3.227289  | -1.009934 |

|   |           |           |           |
|---|-----------|-----------|-----------|
| 6 | -2.962209 | -5.220016 | -0.529420 |
| 1 | -2.363363 | -5.730401 | -1.293140 |
| 1 | -2.580063 | -5.532454 | 0.450655  |
| 1 | -3.992016 | -5.580058 | -0.612774 |
| 6 | -5.324516 | -3.151261 | -0.845758 |
| 6 | -6.356868 | -2.451460 | -0.360763 |
| 1 | -5.553631 | -4.101146 | -1.330769 |
| 1 | -7.375120 | -2.811301 | -0.478796 |
| 1 | -6.227561 | -1.515034 | 0.172402  |
| 6 | -3.456509 | 4.618713  | -1.370199 |
| 6 | -4.422297 | 5.203619  | -2.087690 |
| 1 | -2.770569 | 5.264483  | -0.820731 |
| 1 | -4.532780 | 6.284311  | -2.102942 |
| 1 | -5.113027 | 4.629245  | -2.698213 |
| 6 | 4.492278  | -2.519135 | -0.273052 |
| 6 | 5.148461  | -2.279380 | -1.636356 |
| 1 | 4.807652  | -3.495956 | 0.107098  |
| 1 | 4.875270  | -1.783373 | 0.443964  |
| 1 | 4.783840  | -3.010309 | -2.368997 |
| 1 | 4.868643  | -1.300549 | -2.041999 |
| 6 | 4.176748  | 2.789986  | -0.202752 |
| 6 | 4.358885  | 2.688276  | 1.316249  |
| 1 | 4.510717  | 3.775419  | -0.545148 |
| 1 | 4.834752  | 2.065175  | -0.694030 |
| 1 | 3.790357  | 3.473191  | 1.828723  |
| 1 | 3.937074  | 1.748690  | 1.694936  |
| 6 | 6.650411  | -2.373471 | -1.591815 |
| 8 | 7.320634  | -2.718295 | -0.645924 |
| 8 | 7.212339  | -2.030009 | -2.771476 |
| 1 | 8.169760  | -2.120644 | -2.641855 |
| 6 | 5.797926  | 2.780498  | 1.744162  |
| 8 | 6.761813  | 2.841336  | 1.014950  |
| 8 | 5.927210  | 2.786489  | 3.088764  |
| 1 | 6.881806  | 2.823276  | 3.259019  |
| 6 | -0.052130 | 3.346202  | 2.414513  |
| 6 | -1.053686 | 4.477507  | 2.293568  |
| 1 | 0.861008  | 3.555685  | 1.845033  |
| 1 | 0.239918  | 3.173413  | 3.456091  |
| 1 | -0.614687 | 5.412744  | 2.659519  |
| 1 | -1.348600 | 4.608126  | 1.248509  |
| 1 | -1.953676 | 4.262027  | 2.877402  |
| 7 | -3.506428 | 1.864148  | 2.799307  |
| 7 | -4.264475 | 1.879929  | 2.000406  |

---

**M06-A<sub>Ir</sub>(Me)**

---

Number of imaginary frequencies: 0    Electronic energy:    HF=-1978.1796225  
Zero-point correction=                    0.634596 (Hartree/Particle)  
Thermal correction to Energy=            0.676988  
Thermal correction to Enthalpy=        0.677933

|                                              |              |
|----------------------------------------------|--------------|
| Thermal correction to Gibbs Free Energy=     | 0.558493     |
| Sum of electronic and zero-point Energies=   | -1977.545026 |
| Sum of electronic and thermal Energies=      | -1977.502634 |
| Sum of electronic and thermal Enthalpies=    | -1977.501690 |
| Sum of electronic and thermal Free Energies= | -1977.621129 |

.....  
 Cartesian Coordinates  
 .....

|    |           |           |           |
|----|-----------|-----------|-----------|
| 6  | -4.041205 | -3.012147 | -0.004472 |
| 6  | -2.680364 | -2.545994 | -0.103121 |
| 7  | -2.653067 | -1.175136 | -0.117481 |
| 6  | -3.948625 | -0.749950 | -0.007858 |
| 6  | -4.836118 | -1.893976 | 0.060381  |
| 6  | -1.558857 | -3.362859 | -0.171614 |
| 6  | -0.239380 | -2.956969 | -0.291608 |
| 7  | 0.178524  | -1.653216 | -0.358613 |
| 6  | 1.542786  | -1.679482 | -0.465819 |
| 6  | 2.006119  | -3.050236 | -0.480812 |
| 6  | 0.901576  | -3.843673 | -0.368745 |
| 6  | 2.359555  | -0.562036 | -0.554491 |
| 6  | 1.955182  | 0.764135  | -0.526172 |
| 7  | 0.661656  | 1.187986  | -0.383377 |
| 6  | 0.690498  | 2.557647  | -0.366260 |
| 6  | 2.049802  | 3.020699  | -0.525694 |
| 6  | 2.833720  | 1.906418  | -0.632958 |
| 6  | -0.415642 | 3.378891  | -0.206679 |
| 6  | -1.735801 | 2.979414  | -0.053239 |
| 7  | -2.162727 | 1.679134  | -0.096108 |
| 6  | -3.527962 | 1.698959  | 0.020356  |
| 6  | -3.991652 | 3.058221  | 0.118788  |
| 6  | -2.879324 | 3.860786  | 0.100845  |
| 77 | -0.990280 | 0.008772  | -0.196241 |
| 6  | -4.344806 | 0.577066  | 0.060787  |
| 1  | -0.233840 | 4.451829  | -0.226139 |
| 1  | -5.412480 | 0.763367  | 0.172548  |
| 1  | -1.733937 | -4.437639 | -0.128476 |
| 1  | 3.429141  | -0.743046 | -0.647572 |
| 6  | -0.867078 | 0.003289  | 1.848172  |
| 1  | -1.882390 | 0.082493  | 2.257630  |
| 1  | -0.399399 | -0.935578 | 2.171803  |
| 1  | -0.263258 | 0.863559  | 2.164938  |
| 6  | 4.316696  | 1.845930  | -0.792034 |
| 1  | 4.609373  | 0.984923  | -1.412160 |
| 1  | 4.672499  | 2.743097  | -1.319716 |
| 6  | 5.048116  | 1.759289  | 0.561540  |
| 1  | 4.821339  | 0.804014  | 1.051082  |
| 1  | 4.712308  | 2.581905  | 1.205344  |
| 6  | 6.522468  | 1.926450  | 0.348681  |
| 8  | 7.101923  | 2.975739  | 0.233819  |
| 8  | 7.178184  | 0.739605  | 0.226041  |

|   |           |           |           |
|---|-----------|-----------|-----------|
| 1 | 8.110859  | 0.963232  | 0.052900  |
| 6 | 3.447247  | -3.433483 | -0.546743 |
| 1 | 3.955048  | -2.811848 | -1.296723 |
| 1 | 3.549301  | -4.468602 | -0.898208 |
| 6 | 4.161690  | -3.283690 | 0.816273  |
| 1 | 3.561513  | -2.623901 | 1.461501  |
| 1 | 4.252869  | -4.243907 | 1.334517  |
| 6 | 5.530249  | -2.661042 | 0.751890  |
| 8 | 6.535933  | -3.094274 | 1.256614  |
| 8 | 5.493626  | -1.488403 | 0.084615  |
| 1 | 6.366468  | -1.050420 | 0.155146  |
| 6 | 0.822206  | -5.329261 | -0.321115 |
| 1 | 1.816167  | -5.786819 | -0.393879 |
| 1 | 0.368491  | -5.682191 | 0.616146  |
| 1 | 0.213375  | -5.732627 | -1.143005 |
| 6 | 2.461578  | 4.451198  | -0.547798 |
| 1 | 2.183534  | 4.966495  | 0.383079  |
| 1 | 3.546955  | 4.557815  | -0.665120 |
| 1 | 1.983909  | 5.001876  | -1.370634 |
| 6 | -4.457604 | -4.440037 | -0.032728 |
| 1 | -3.802479 | -5.040236 | -0.677464 |
| 1 | -4.439381 | -4.900778 | 0.966495  |
| 1 | -5.482493 | -4.536292 | -0.413623 |
| 6 | -5.417477 | 3.458940  | 0.264453  |
| 1 | -6.032076 | 3.086621  | -0.567535 |
| 1 | -5.857351 | 3.061657  | 1.190691  |
| 1 | -5.527710 | 4.548763  | 0.297786  |
| 6 | -6.283975 | -1.802160 | 0.138430  |
| 6 | -7.098279 | -2.680380 | 0.734550  |
| 1 | -6.735380 | -0.928996 | -0.340821 |
| 1 | -8.177338 | -2.543248 | 0.725909  |
| 1 | -6.721047 | -3.547850 | 1.273826  |
| 6 | -2.866896 | 5.312113  | 0.217301  |
| 6 | -1.955002 | 6.055285  | 0.853428  |
| 1 | -3.715135 | 5.827767  | -0.241659 |
| 1 | -2.040087 | 7.139106  | 0.890042  |
| 1 | -1.114539 | 5.613188  | 1.386757  |

---

**M06-B<sub>Ir</sub>(Me)**

---

Number of imaginary frequencies: 1    Electronic energy:    HF=-2739.2358889  
Zero-point correction=                    0.856192 (Hartree/Particle)  
Thermal correction to Energy=            0.914296  
Thermal correction to Enthalpy=         0.915240  
Thermal correction to Gibbs Free Energy= 0.761242  
Sum of electronic and zero-point Energies= -2738.379697  
Sum of electronic and thermal Energies= -2738.321593  
Sum of electronic and thermal Enthalpies= -2738.320649  
Sum of electronic and thermal Free Energies= -2738.474647

---

### Cartesian Coordinates

|    |           |           |           |
|----|-----------|-----------|-----------|
| 6  | 3.522576  | -2.910543 | -1.965283 |
| 6  | 3.405985  | -1.637799 | -1.301710 |
| 7  | 2.085594  | -1.290204 | -1.191552 |
| 6  | 1.352901  | -2.289087 | -1.771113 |
| 6  | 2.245184  | -3.340313 | -2.225858 |
| 6  | 4.474334  | -0.897883 | -0.807148 |
| 6  | 4.413952  | 0.304517  | -0.117924 |
| 7  | 3.264312  | 0.990833  | 0.159760  |
| 6  | 3.630335  | 2.142016  | 0.806228  |
| 6  | 5.062543  | 2.178563  | 0.975215  |
| 6  | 5.556927  | 1.038569  | 0.389651  |
| 6  | 2.750027  | 3.135121  | 1.222638  |
| 6  | 1.375054  | 3.158115  | 1.043102  |
| 7  | 0.647403  | 2.178100  | 0.425693  |
| 6  | -0.656767 | 2.583454  | 0.436603  |
| 6  | -0.765376 | 3.871584  | 1.091396  |
| 6  | 0.495898  | 4.227738  | 1.470899  |
| 77 | 1.368268  | 0.448491  | -0.385720 |
| 7  | -0.527177 | -0.106168 | -0.895506 |
| 6  | -1.665339 | 0.622305  | -0.696845 |
| 6  | -2.801366 | -0.090563 | -1.236163 |
| 6  | -2.319491 | -1.239822 | -1.796400 |
| 6  | -0.890878 | -1.243490 | -1.565786 |
| 6  | -1.723705 | 1.865045  | -0.082642 |
| 6  | -0.023585 | -2.252489 | -1.960096 |
| 8  | -4.109497 | -4.034186 | 1.993289  |
| 6  | -3.310509 | -3.062738 | 2.479431  |
| 8  | -3.596162 | -2.357117 | 3.422266  |
| 6  | -2.061330 | -2.968274 | 1.718549  |
| 7  | -1.948040 | -3.802366 | 0.710248  |
| 7  | -1.855224 | -4.527561 | -0.159864 |
| 6  | -0.980573 | -2.012436 | 2.004463  |
| 6  | -1.276512 | -0.753642 | 2.539929  |
| 6  | -0.272485 | 0.158966  | 2.827438  |
| 6  | 1.052786  | -0.164932 | 2.550837  |
| 6  | 1.374996  | -1.411504 | 2.012868  |
| 6  | 0.365454  | -2.343927 | 1.757936  |
| 8  | 0.597882  | -3.588459 | 1.274346  |
| 6  | 1.929546  | -4.046164 | 1.204754  |
| 1  | -0.461858 | -3.095202 | -2.493100 |
| 1  | -2.707031 | 2.326003  | -0.004260 |
| 1  | 3.188647  | 3.998279  | 1.722974  |
| 1  | 5.467511  | -1.308021 | -0.988267 |
| 1  | -2.315299 | -0.506638 | 2.741099  |
| 1  | -0.523333 | 1.135755  | 3.238033  |
| 1  | 2.416262  | -1.657097 | 1.815698  |
| 1  | 1.851909  | 0.544195  | 2.762979  |
| 1  | 1.876802  | -5.076990 | 0.842895  |

|   |           |           |           |
|---|-----------|-----------|-----------|
| 1 | 2.529035  | -3.454893 | 0.498164  |
| 1 | 2.405189  | -4.026964 | 2.196893  |
| 6 | 1.581818  | 1.352941  | -2.212249 |
| 1 | 0.991465  | 2.279017  | -2.226682 |
| 1 | 2.643730  | 1.578921  | -2.378993 |
| 1 | 1.219974  | 0.666835  | -2.989797 |
| 6 | -5.351669 | -4.228899 | 2.683564  |
| 1 | -6.002847 | -4.706172 | 1.943201  |
| 1 | -5.768790 | -3.249876 | 2.947589  |
| 6 | -5.165145 | -5.094409 | 3.906265  |
| 1 | -4.528260 | -4.588794 | 4.640554  |
| 1 | -6.134005 | -5.300888 | 4.377211  |
| 1 | -4.702568 | -6.051511 | 3.637102  |
| 6 | 4.805894  | -3.617881 | -2.228060 |
| 1 | 4.642148  | -4.562797 | -2.758585 |
| 1 | 5.489289  | -3.008546 | -2.836449 |
| 1 | 5.337486  | -3.858372 | -1.295480 |
| 6 | 5.809306  | 3.244826  | 1.695366  |
| 1 | 6.754616  | 2.853992  | 2.093500  |
| 1 | 6.060279  | 4.093515  | 1.041327  |
| 1 | 5.230873  | 3.646679  | 2.537497  |
| 6 | 1.867338  | -4.621191 | -2.805771 |
| 6 | 0.817679  | -5.366405 | -2.441993 |
| 1 | 2.535038  | -5.010876 | -3.579312 |
| 1 | 0.612966  | -6.321469 | -2.921171 |
| 1 | 0.142369  | -5.067289 | -1.639926 |
| 6 | 6.931589  | 0.577389  | 0.297993  |
| 6 | 8.019125  | 1.352071  | 0.215004  |
| 1 | 7.074644  | -0.506833 | 0.297846  |
| 1 | 9.016322  | 0.919820  | 0.170290  |
| 1 | 7.954922  | 2.437571  | 0.159680  |
| 6 | -3.065029 | -2.289913 | -2.542575 |
| 1 | -4.147555 | -2.113479 | -2.512792 |
| 1 | -2.768193 | -2.316129 | -3.601316 |
| 1 | -2.879107 | -3.293576 | -2.135539 |
| 6 | -4.211052 | 0.397657  | -1.207032 |
| 1 | -4.905197 | -0.455678 | -1.229443 |
| 1 | -4.415732 | 0.939519  | -0.271156 |
| 6 | -2.046183 | 4.628563  | 1.219231  |
| 1 | -1.965730 | 5.373898  | 2.021507  |
| 1 | -2.847216 | 3.943179  | 1.527168  |
| 6 | -2.450140 | 5.333214  | -0.095552 |
| 1 | -1.873906 | 4.895097  | -0.925639 |
| 1 | -2.210289 | 6.401561  | -0.075467 |
| 6 | -4.532160 | 1.326496  | -2.394544 |
| 1 | -3.892070 | 2.215790  | -2.351857 |
| 1 | -4.347050 | 0.793733  | -3.335910 |
| 6 | -3.897805 | 5.195968  | -0.494850 |
| 8 | -4.598935 | 6.090674  | -0.898367 |
| 8 | -4.304537 | 3.916504  | -0.411329 |

|   |           |          |           |
|---|-----------|----------|-----------|
| 1 | -5.202483 | 3.813355 | -0.806653 |
| 6 | -5.965108 | 1.756412 | -2.323891 |
| 8 | -6.396730 | 2.725576 | -1.729881 |
| 8 | -6.782746 | 0.898982 | -2.948329 |
| 1 | -7.689436 | 1.227810 | -2.807584 |
| 6 | 0.946750  | 5.465476 | 2.164177  |
| 1 | 1.653072  | 6.041014 | 1.548603  |
| 1 | 0.102489  | 6.126361 | 2.394323  |
| 1 | 1.457264  | 5.241911 | 3.111954  |

-----  
**M06-TS(B-C)<sub>Ir(Me)</sub>**  
 -----

Number of imaginary frequencies: 1    Electronic energy:    HF=-2739.2103201  
 Zero-point correction=                    0.853326 (Hartree/Particle)  
 Thermal correction to Energy=            0.911463  
 Thermal correction to Enthalpy=         0.912407  
 Thermal correction to Gibbs Free Energy= 0.762790  
 Sum of electronic and zero-point Energies= -2738.356994  
 Sum of electronic and thermal Energies= -2738.298857  
 Sum of electronic and thermal Enthalpies= -2738.297913  
 Sum of electronic and thermal Free Energies= -2738.447531

-----  
 Cartesian Coordinates  
 -----

|    |           |           |           |
|----|-----------|-----------|-----------|
| 6  | 3.398373  | -3.370139 | -1.083153 |
| 6  | 2.113699  | -2.821337 | -0.729218 |
| 7  | 2.156035  | -1.452147 | -0.798347 |
| 6  | 3.406231  | -1.110773 | -1.233384 |
| 6  | 4.203196  | -2.307373 | -1.414750 |
| 6  | 0.984234  | -3.572564 | -0.429387 |
| 6  | -0.294448 | -3.096724 | -0.170508 |
| 7  | -0.650617 | -1.780741 | -0.121308 |
| 6  | -1.996445 | -1.732198 | 0.109303  |
| 6  | -2.512761 | -3.077245 | 0.253526  |
| 6  | -1.454363 | -3.924916 | 0.071410  |
| 6  | -2.751082 | -0.568722 | 0.179955  |
| 6  | -2.301864 | 0.732255  | -0.006234 |
| 7  | -1.009794 | 1.092200  | -0.254199 |
| 6  | -0.987221 | 2.444191  | -0.421528 |
| 6  | -2.317891 | 2.978892  | -0.246499 |
| 6  | -3.135461 | 1.914620  | 0.008688  |
| 6  | 0.133795  | 3.200181  | -0.741103 |
| 6  | 1.419924  | 2.730658  | -0.968778 |
| 7  | 1.790567  | 1.417910  | -0.943657 |
| 6  | 3.084421  | 1.348580  | -1.371329 |
| 6  | 3.576230  | 2.673190  | -1.656929 |
| 6  | 2.556610  | 3.544178  | -1.368380 |
| 77 | 0.596360  | -0.177502 | -0.460158 |
| 6  | 3.831041  | 0.183953  | -1.496980 |
| 1  | -0.018320 | 4.271130  | -0.861160 |

|   |           |           |           |
|---|-----------|-----------|-----------|
| 1 | 4.846441  | 0.298233  | -1.875395 |
| 1 | 1.103280  | -4.656150 | -0.445637 |
| 1 | -3.809576 | -0.687383 | 0.405778  |
| 6 | 0.931513  | 0.108914  | 1.732927  |
| 6 | 0.918085  | 1.489107  | 2.273032  |
| 6 | -0.277266 | 2.017473  | 2.782606  |
| 6 | 2.018778  | 2.373057  | 2.156221  |
| 6 | -0.393860 | 3.355373  | 3.143896  |
| 1 | -1.138361 | 1.362218  | 2.863231  |
| 6 | 1.912910  | 3.701106  | 2.563682  |
| 6 | 0.703497  | 4.196510  | 3.041810  |
| 1 | -1.348077 | 3.728069  | 3.511680  |
| 1 | 2.770416  | 4.364342  | 2.482223  |
| 1 | 0.632561  | 5.242995  | 3.335559  |
| 6 | 0.142855  | -0.917547 | 2.495960  |
| 8 | -1.013850 | -0.755762 | 2.821338  |
| 8 | 0.797507  | -2.069140 | 2.680476  |
| 8 | 3.166288  | 1.852702  | 1.665304  |
| 6 | 4.321755  | 2.652247  | 1.617288  |
| 1 | 5.109539  | 2.011534  | 1.207413  |
| 1 | 4.182357  | 3.520124  | 0.953758  |
| 1 | 4.615166  | 2.996666  | 2.620449  |
| 7 | 3.474865  | -1.157333 | 1.680721  |
| 7 | 2.633531  | -0.539552 | 2.067276  |
| 6 | 0.032011  | -0.318750 | -2.475997 |
| 1 | 0.286559  | 0.612102  | -3.002709 |
| 1 | 0.557196  | -1.160662 | -2.949905 |
| 1 | -1.050728 | -0.487389 | -2.550924 |
| 6 | -4.622104 | 1.920058  | 0.132721  |
| 1 | -4.970699 | 1.085191  | 0.757877  |
| 1 | -4.957366 | 2.838369  | 0.638046  |
| 6 | -5.274664 | 1.835406  | -1.258633 |
| 1 | -5.000842 | 0.879200  | -1.733299 |
| 1 | -4.914251 | 2.648833  | -1.898948 |
| 6 | -6.766984 | 1.921505  | -1.221418 |
| 8 | -7.470712 | 2.728727  | -1.768530 |
| 8 | -7.308905 | 0.933547  | -0.445482 |
| 1 | -8.274794 | 1.052819  | -0.489167 |
| 6 | -3.929894 | -3.455448 | 0.539466  |
| 1 | -4.348906 | -2.832483 | 1.342148  |
| 1 | -3.942590 | -4.483427 | 0.925799  |
| 6 | -4.866140 | -3.397457 | -0.683421 |
| 1 | -4.351403 | -3.736778 | -1.589407 |
| 1 | -5.721159 | -4.065876 | -0.504392 |
| 6 | -5.443915 | -2.035629 | -0.955394 |
| 8 | -5.363675 | -1.426216 | -1.997594 |
| 8 | -6.100006 | -1.563973 | 0.118838  |
| 1 | -6.500737 | -0.700326 | -0.128111 |
| 6 | -1.427807 | -5.413536 | 0.109370  |
| 1 | -1.069633 | -5.838183 | -0.839314 |



|   |           |           |           |
|---|-----------|-----------|-----------|
| 1 | -0.760278 | -5.790461 | 0.899622  |
| 1 | -2.423484 | -5.833359 | 0.295250  |
| 6 | -2.670872 | 4.420973  | -0.350141 |
| 1 | -2.502508 | 4.812659  | -1.363824 |
| 1 | -3.725168 | 4.597265  | -0.103405 |
| 1 | -2.064074 | 5.032496  | 0.334124  |
| 6 | 3.747058  | -4.815443 | -1.032149 |
| 1 | 3.235526  | -5.323437 | -0.203246 |
| 1 | 3.473445  | -5.346474 | -1.956436 |
| 1 | 4.827357  | -4.947834 | -0.890637 |
| 6 | 4.958482  | 2.988362  | -2.110288 |
| 1 | 5.713021  | 2.671189  | -1.374141 |
| 1 | 5.203402  | 2.480205  | -3.053766 |
| 1 | 5.094977  | 4.064557  | -2.268238 |
| 6 | 5.596392  | -2.307046 | -1.826162 |
| 6 | 6.213602  | -3.270193 | -2.519746 |
| 1 | 6.182260  | -1.431473 | -1.532869 |
| 1 | 7.270391  | -3.197216 | -2.767170 |
| 1 | 5.685292  | -4.147553 | -2.889584 |
| 6 | 2.627148  | 4.997030  | -1.412123 |
| 6 | 2.033519  | 5.841279  | -0.559430 |
| 1 | 3.261419  | 5.420133  | -2.196228 |
| 1 | 2.152670  | 6.917937  | -0.661619 |
| 1 | 1.430392  | 5.488934  | 0.278004  |
| 6 | 0.032853  | -3.148533 | 3.234480  |
| 1 | -0.338677 | -2.852128 | 4.224458  |
| 1 | -0.839308 | -3.328577 | 2.589880  |
| 6 | 0.950905  | -4.341470 | 3.292832  |
| 1 | 1.811612  | -4.147446 | 3.943994  |
| 1 | 0.415543  | -5.217328 | 3.678798  |
| 1 | 1.330662  | -4.575385 | 2.288701  |

-----  
**M06-C<sub>Ir(Me)</sub>**  
 -----

Number of imaginary frequencies: 0    Electronic energy:    HF=-2739.2286384  
 Zero-point correction=                    0.851597 (Hartree/Particle)  
 Thermal correction to Energy=            0.911934  
 Thermal correction to Enthalpy=         0.912878  
 Thermal correction to Gibbs Free Energy= 0.755238  
 Sum of electronic and zero-point Energies= -2738.377041  
 Sum of electronic and thermal Energies= -2738.316705  
 Sum of electronic and thermal Enthalpies= -2738.315760  
 Sum of electronic and thermal Free Energies= -2738.473401

-----  
 Cartesian Coordinates  
 -----

|   |          |           |           |
|---|----------|-----------|-----------|
| 6 | 3.173283 | -3.341240 | -1.250970 |
| 6 | 1.917736 | -2.747350 | -0.867326 |
| 7 | 1.998661 | -1.389206 | -0.985508 |
| 6 | 3.236997 | -1.085868 | -1.465927 |

|    |           |           |           |
|----|-----------|-----------|-----------|
| 6  | 3.992565  | -2.309155 | -1.649050 |
| 6  | 0.782997  | -3.455090 | -0.481100 |
| 6  | -0.476548 | -2.932197 | -0.224545 |
| 7  | -0.788534 | -1.605589 | -0.225700 |
| 6  | -2.133378 | -1.498831 | -0.022361 |
| 6  | -2.702132 | -2.822664 | 0.137745  |
| 6  | -1.673765 | -3.713262 | 0.017723  |
| 6  | -2.849360 | -0.310580 | 0.037901  |
| 6  | -2.337063 | 0.976011  | -0.073285 |
| 7  | -1.032369 | 1.286917  | -0.294032 |
| 6  | -0.924323 | 2.644460  | -0.323794 |
| 6  | -2.227885 | 3.232218  | -0.106538 |
| 6  | -3.103551 | 2.194491  | 0.056264  |
| 6  | 0.250326  | 3.355190  | -0.543788 |
| 6  | 1.507195  | 2.832466  | -0.830655 |
| 7  | 1.792048  | 1.505540  | -0.949017 |
| 6  | 3.057072  | 1.393664  | -1.447898 |
| 6  | 3.628307  | 2.706439  | -1.615795 |
| 6  | 2.683753  | 3.606378  | -1.190913 |
| 77 | 0.521962  | -0.053996 | -0.528403 |
| 6  | 3.708246  | 0.196165  | -1.719980 |
| 1  | 0.168319  | 4.440791  | -0.553106 |
| 1  | 4.707152  | 0.276160  | -2.148612 |
| 1  | 0.876971  | -4.540104 | -0.440119 |
| 1  | -3.920683 | -0.392594 | 0.210170  |
| 6  | 0.847297  | 0.206215  | 1.467389  |
| 6  | 1.736878  | 1.180514  | 2.070251  |
| 6  | 1.203230  | 2.283754  | 2.759196  |
| 6  | 3.138408  | 1.130288  | 1.862288  |
| 6  | 2.006520  | 3.353247  | 3.131763  |
| 1  | 0.128642  | 2.306036  | 2.933987  |
| 6  | 3.943883  | 2.197446  | 2.252327  |
| 6  | 3.370966  | 3.309355  | 2.865164  |
| 1  | 1.569297  | 4.216817  | 3.629199  |
| 1  | 5.017255  | 2.169903  | 2.081473  |
| 1  | 4.010056  | 4.143881  | 3.149743  |
| 6  | -0.242373 | -0.251836 | 2.364613  |
| 8  | -1.211923 | 0.398293  | 2.696990  |
| 8  | -0.026262 | -1.522163 | 2.724508  |
| 8  | 3.609089  | -0.018771 | 1.344195  |
| 6  | 4.999074  | -0.201498 | 1.253573  |
| 1  | 5.145651  | -1.217822 | 0.872741  |
| 1  | 5.456767  | 0.512777  | 0.550233  |
| 1  | 5.478061  | -0.103894 | 2.239485  |
| 7  | 2.834535  | -3.083278 | 2.112810  |
| 7  | 2.845371  | -2.303573 | 2.896713  |
| 6  | -0.040974 | -0.004539 | -2.582927 |
| 1  | -1.027244 | -0.468562 | -2.728781 |
| 1  | -0.083757 | 1.034683  | -2.938808 |
| 1  | 0.702244  | -0.548591 | -3.184524 |

|   |           |           |           |
|---|-----------|-----------|-----------|
| 6 | -4.574552 | 2.267342  | 0.296368  |
| 1 | -4.899439 | 1.460403  | 0.970482  |
| 1 | -4.823745 | 3.211670  | 0.802236  |
| 6 | -5.387038 | 2.189594  | -1.010647 |
| 1 | -5.264850 | 1.201515  | -1.471719 |
| 1 | -5.024222 | 2.956850  | -1.706044 |
| 6 | -6.828849 | 2.483002  | -0.725880 |
| 8 | -7.321669 | 3.578319  | -0.639312 |
| 8 | -7.563290 | 1.358842  | -0.497786 |
| 1 | -8.463722 | 1.664674  | -0.284623 |
| 6 | -4.161092 | -3.074588 | 0.329199  |
| 1 | -4.559955 | -2.357646 | 1.060618  |
| 1 | -4.320458 | -4.068945 | 0.766978  |
| 6 | -4.959154 | -2.963734 | -0.990808 |
| 1 | -4.352510 | -2.414694 | -1.727191 |
| 1 | -5.172170 | -3.948415 | -1.419633 |
| 6 | -6.260064 | -2.213647 | -0.887294 |
| 8 | -7.334506 | -2.591668 | -1.283344 |
| 8 | -6.071720 | -1.001266 | -0.326780 |
| 1 | -6.904817 | -0.488965 | -0.372697 |
| 6 | -1.722501 | -5.200935 | 0.058745  |
| 1 | -2.730111 | -5.562739 | 0.296855  |
| 1 | -1.437843 | -5.641330 | -0.907714 |
| 1 | -1.037530 | -5.617518 | 0.811760  |
| 6 | -2.506943 | 4.694342  | -0.088602 |
| 1 | -2.253127 | 5.165312  | -1.049010 |
| 1 | -3.566708 | 4.901140  | 0.104278  |
| 1 | -1.922722 | 5.213024  | 0.684884  |
| 6 | 3.490106  | -4.791373 | -1.161160 |
| 1 | 2.980734  | -5.261182 | -0.309626 |
| 1 | 3.191671  | -5.342710 | -2.065646 |
| 1 | 4.569302  | -4.944242 | -1.031484 |
| 6 | 5.011621  | 2.977612  | -2.093388 |
| 1 | 5.768489  | 2.600934  | -1.388348 |
| 1 | 5.210419  | 2.498621  | -3.062425 |
| 1 | 5.192564  | 4.052206  | -2.211692 |
| 6 | 5.367991  | -2.358556 | -2.114352 |
| 6 | 5.947018  | -3.369750 | -2.772151 |
| 1 | 5.977590  | -1.475423 | -1.899990 |
| 1 | 6.993725  | -3.324270 | -3.064609 |
| 1 | 5.396232  | -4.260704 | -3.068885 |
| 6 | 2.839041  | 5.050452  | -1.105435 |
| 6 | 2.331380  | 5.836027  | -0.149196 |
| 1 | 3.456619  | 5.512945  | -1.880479 |
| 1 | 2.500144  | 6.910787  | -0.153099 |
| 1 | 1.758172  | 5.429054  | 0.683743  |
| 6 | -1.078553 | -2.163631 | 3.456617  |
| 1 | -1.242755 | -1.629872 | 4.402269  |
| 1 | -2.004118 | -2.091035 | 2.866320  |
| 6 | -0.649374 | -3.592580 | 3.659615  |

|   |           |           |          |
|---|-----------|-----------|----------|
| 1 | 0.258662  | -3.647910 | 4.272554 |
| 1 | -1.439325 | -4.166970 | 4.157604 |
| 1 | -0.434191 | -4.057326 | 2.687836 |

-----  
**M06-TS(C-P)<sub>Ir(Me)</sub>**  
 -----

Number of imaginary frequencies: 1    Electronic energy:    HF=-2629.7348728  
 Zero-point correction=                    0.841658 (Hartree/Particle)  
 Thermal correction to Energy=            0.897629  
 Thermal correction to Enthalpy=         0.898574  
 Thermal correction to Gibbs Free Energy= 0.750567  
 Sum of electronic and zero-point Energies= -2628.893215  
 Sum of electronic and thermal Energies= -2628.837243  
 Sum of electronic and thermal Enthalpies= -2628.836299  
 Sum of electronic and thermal Free Energies= -2628.984306

.....  
 Cartesian Coordinates  
 .....

|    |           |           |           |
|----|-----------|-----------|-----------|
| 6  | 3.484903  | -3.412438 | -0.958435 |
| 6  | 2.197099  | -2.830761 | -0.670752 |
| 7  | 2.263774  | -1.467182 | -0.793878 |
| 6  | 3.533657  | -1.159972 | -1.195111 |
| 6  | 4.319811  | -2.374995 | -1.298641 |
| 6  | 1.048421  | -3.549820 | -0.362190 |
| 6  | -0.225442 | -3.040952 | -0.149410 |
| 7  | -0.558722 | -1.717407 | -0.192075 |
| 6  | -1.902642 | -1.631686 | 0.029547  |
| 6  | -2.445935 | -2.956996 | 0.243137  |
| 6  | -1.405793 | -3.833754 | 0.130424  |
| 6  | -2.641926 | -0.456895 | 0.039705  |
| 6  | -2.166465 | 0.828639  | -0.181414 |
| 7  | -0.865791 | 1.150766  | -0.439261 |
| 6  | -0.809155 | 2.501667  | -0.616309 |
| 6  | -2.127443 | 3.071533  | -0.452010 |
| 6  | -2.969819 | 2.032291  | -0.168950 |
| 6  | 0.346998  | 3.232930  | -0.862095 |
| 6  | 1.634051  | 2.734978  | -1.002538 |
| 7  | 1.960635  | 1.407365  | -1.000401 |
| 6  | 3.277665  | 1.311530  | -1.357996 |
| 6  | 3.829258  | 2.630686  | -1.548798 |
| 6  | 2.820325  | 3.522773  | -1.288539 |
| 77 | 0.702757  | -0.155229 | -0.581787 |
| 6  | 3.994686  | 0.122805  | -1.467582 |
| 1  | 0.231699  | 4.310048  | -0.969862 |
| 1  | 5.028649  | 0.212763  | -1.799513 |
| 1  | 1.150916  | -4.634058 | -0.312007 |
| 1  | -3.709645 | -0.553514 | 0.228720  |
| 6  | 0.241999  | -0.334285 | -2.604184 |
| 1  | -0.806055 | -0.643846 | -2.724395 |
| 1  | 0.388841  | 0.633646  | -3.104956 |

|   |           |           |           |
|---|-----------|-----------|-----------|
| 1 | 0.895442  | -1.086666 | -3.070224 |
| 6 | -4.441545 | 2.089533  | 0.073271  |
| 1 | -4.747731 | 1.331791  | 0.810482  |
| 1 | -4.711376 | 3.066291  | 0.501725  |
| 6 | -5.254622 | 1.887957  | -1.220122 |
| 1 | -5.113974 | 0.866240  | -1.594504 |
| 1 | -4.907306 | 2.600381  | -1.978722 |
| 6 | -6.701141 | 2.178308  | -0.956353 |
| 8 | -7.216050 | 3.266816  | -0.974465 |
| 8 | -7.410138 | 1.067600  | -0.613247 |
| 1 | -8.315838 | 1.373777  | -0.424401 |
| 6 | -3.897117 | -3.229570 | 0.460264  |
| 1 | -4.307071 | -2.483570 | 1.154256  |
| 1 | -4.032918 | -4.201861 | 0.951965  |
| 6 | -4.701969 | -3.207804 | -0.860243 |
| 1 | -4.113268 | -2.679422 | -1.625715 |
| 1 | -4.889028 | -4.218491 | -1.237859 |
| 6 | -6.021860 | -2.488978 | -0.785516 |
| 8 | -7.091327 | -2.919119 | -1.139781 |
| 8 | -5.859371 | -1.238590 | -0.304997 |
| 1 | -6.708395 | -0.755374 | -0.367381 |
| 6 | -1.421061 | -5.317814 | 0.247039  |
| 1 | -2.431338 | -5.693875 | 0.449242  |
| 1 | -1.071079 | -5.803184 | -0.675371 |
| 1 | -0.769960 | -5.672378 | 1.060435  |
| 6 | -2.440315 | 4.522497  | -0.564667 |
| 1 | -2.216150 | 4.910033  | -1.568768 |
| 1 | -3.499957 | 4.725929  | -0.366808 |
| 1 | -1.848316 | 5.119791  | 0.145270  |
| 6 | 3.808815  | -4.860540 | -0.852129 |
| 1 | 3.237533  | -5.344960 | -0.049506 |
| 1 | 3.588701  | -5.407351 | -1.781418 |
| 1 | 4.876012  | -5.004718 | -0.638963 |
| 6 | 5.245575  | 2.915502  | -1.907262 |
| 1 | 5.945127  | 2.526608  | -1.152957 |
| 1 | 5.521822  | 2.454108  | -2.866275 |
| 1 | 5.429061  | 3.992670  | -1.991970 |
| 6 | 5.726144  | -2.410355 | -1.660478 |
| 6 | 6.360572  | -3.415440 | -2.275038 |
| 1 | 6.310350  | -1.523034 | -1.400477 |
| 1 | 7.425656  | -3.360764 | -2.489196 |
| 1 | 5.840819  | -4.310378 | -2.612942 |
| 6 | 2.923275  | 4.974417  | -1.274632 |
| 6 | 2.292084  | 5.793373  | -0.425525 |
| 1 | 3.607296  | 5.414206  | -2.005754 |
| 1 | 2.430529  | 6.871362  | -0.476168 |
| 1 | 1.643898  | 5.415303  | 0.366156  |
| 6 | 1.123098  | 0.120020  | 1.726106  |
| 6 | 1.074489  | 1.479621  | 2.244382  |
| 6 | 0.394774  | -0.915940 | 2.480373  |

|   |           |           |          |
|---|-----------|-----------|----------|
| 6 | -0.114646 | 2.214246  | 2.378279 |
| 6 | 2.249294  | 2.118630  | 2.677559 |
| 8 | -0.739386 | -0.778951 | 2.889645 |
| 8 | 1.109658  | -2.052165 | 2.584683 |
| 6 | -0.089961 | 3.538504  | 2.789374 |
| 1 | -1.052575 | 1.729263  | 2.119820 |
| 6 | 2.296898  | 3.440467  | 3.090062 |
| 8 | 3.358181  | 1.309248  | 2.877891 |
| 6 | 1.112885  | 4.165304  | 3.120143 |
| 1 | -1.026255 | 4.092467  | 2.844521 |
| 1 | 3.246108  | 3.867850  | 3.404389 |
| 6 | 3.501538  | 0.346512  | 1.977103 |
| 1 | 1.124710  | 5.207523  | 3.433443 |
| 1 | 4.047355  | -0.524365 | 2.344656 |
| 1 | 3.665760  | 0.658850  | 0.938066 |
| 1 | 2.216007  | -0.219924 | 1.489398 |
| 6 | 0.430409  | -3.172364 | 3.168429 |
| 1 | -0.598623 | -3.200681 | 2.784958 |
| 1 | 0.971386  | -4.046302 | 2.785500 |
| 6 | 0.463371  | -3.110160 | 4.676685 |
| 1 | -0.100835 | -2.242992 | 5.036916 |
| 1 | 0.014744  | -4.014806 | 5.105563 |
| 1 | 1.495718  | -3.034526 | 5.039902 |

---

**M06-<sup>5</sup>A<sub>Fe(cys)</sub>**

---

Number of imaginary frequencies: 0    Electronic energy:    HF=-2395.189857  
Zero-point correction=                    0.630786 (Hartree/Particle)  
Thermal correction to Energy=            0.676574  
Thermal correction to Enthalpy=         0.677519  
Thermal correction to Gibbs Free Energy= 0.545985  
Sum of electronic and zero-point Energies= -2394.559071  
Sum of electronic and thermal Energies= -2394.513282  
Sum of electronic and thermal Enthalpies= -2394.512338  
Sum of electronic and thermal Free Energies= -2394.643872

---

Cartesian Coordinates

---

|    |           |           |           |
|----|-----------|-----------|-----------|
| 26 | 1.013773  | -0.111179 | 0.414920  |
| 7  | 2.387114  | -1.505460 | -0.470429 |
| 6  | 2.126590  | -2.821678 | -0.693103 |
| 6  | 3.355637  | -3.553290 | -0.885770 |
| 6  | 4.374064  | -2.631033 | -0.807153 |
| 6  | 3.734762  | -1.351271 | -0.524188 |
| 6  | 0.851015  | -3.393222 | -0.736831 |
| 6  | -0.367892 | -2.733806 | -0.598502 |
| 7  | -0.509273 | -1.400607 | -0.369318 |
| 6  | -1.841439 | -1.151508 | -0.315802 |
| 6  | -2.592925 | -2.379699 | -0.517217 |
| 6  | -1.668850 | -3.372009 | -0.687304 |

|    |           |           |           |
|----|-----------|-----------|-----------|
| 6  | -2.410582 | 0.107765  | -0.117113 |
| 6  | -1.735733 | 1.321018  | 0.029641  |
| 7  | -0.386355 | 1.463461  | 0.052819  |
| 6  | -0.132830 | 2.793665  | 0.173916  |
| 6  | -1.376186 | 3.540625  | 0.234825  |
| 6  | -2.380869 | 2.617863  | 0.152333  |
| 6  | 1.135690  | 3.367185  | 0.220177  |
| 6  | 2.360982  | 2.704296  | 0.108220  |
| 6  | 3.666923  | 3.347390  | 0.166020  |
| 6  | 4.593680  | 2.337310  | 0.034809  |
| 6  | 3.835761  | 1.112397  | -0.101381 |
| 7  | 2.499649  | 1.367948  | -0.052215 |
| 6  | 4.402935  | -0.147905 | -0.294823 |
| 1  | 0.807017  | -4.469736 | -0.913075 |
| 1  | 5.489508  | -0.202478 | -0.268366 |
| 1  | 1.171551  | 4.448849  | 0.357156  |
| 1  | -3.501752 | 0.152642  | -0.101648 |
| 16 | 1.104348  | -0.469877 | 2.755182  |
| 6  | 1.665140  | -2.218511 | 2.758222  |
| 1  | 2.646803  | -2.326838 | 2.276337  |
| 1  | 1.750603  | -2.568609 | 3.795136  |
| 1  | 0.953189  | -2.869835 | 2.232890  |
| 6  | -1.488386 | 5.022153  | 0.341783  |
| 1  | -0.970585 | 5.407737  | 1.232311  |
| 1  | -1.042739 | 5.529517  | -0.527186 |
| 1  | -2.536155 | 5.344916  | 0.407066  |
| 6  | -1.903327 | -4.826298 | -0.908783 |
| 1  | -1.435788 | -5.180635 | -1.839567 |
| 1  | -1.483681 | -5.434699 | -0.093587 |
| 1  | -2.974998 | -5.058529 | -0.971164 |
| 6  | 3.451348  | -5.011493 | -1.173454 |
| 1  | 2.922139  | -5.608657 | -0.416643 |
| 1  | 3.005057  | -5.265733 | -2.146848 |
| 1  | 4.493257  | -5.354849 | -1.197756 |
| 6  | 6.075819  | 2.453947  | -0.032023 |
| 1  | 6.544239  | 2.406965  | 0.963452  |
| 1  | 6.519421  | 1.648410  | -0.632875 |
| 1  | 6.373332  | 3.412614  | -0.480422 |
| 6  | 5.787167  | -2.909886 | -0.999211 |
| 6  | 6.711705  | -2.105876 | -1.540053 |
| 1  | 6.111964  | -3.908554 | -0.688111 |
| 1  | 7.748086  | -2.425708 | -1.633904 |
| 1  | 6.465641  | -1.118341 | -1.927922 |
| 6  | 3.878629  | 4.775714  | 0.288165  |
| 6  | 4.963894  | 5.398455  | 0.769125  |
| 1  | 3.051285  | 5.404514  | -0.054940 |
| 1  | 5.020490  | 6.485275  | 0.797237  |
| 1  | 5.813179  | 4.855778  | 1.180585  |
| 6  | -4.078236 | -2.510373 | -0.460176 |
| 6  | -4.566591 | -2.683478 | 0.973819  |

|   |           |           |           |
|---|-----------|-----------|-----------|
| 1 | -4.420632 | -3.367840 | -1.058147 |
| 1 | -4.571670 | -1.632776 | -0.903342 |
| 1 | -4.103077 | -3.568143 | 1.438149  |
| 1 | -4.245756 | -1.840248 | 1.604470  |
| 6 | -3.851172 | 2.868088  | 0.097341  |
| 6 | -4.341354 | 2.989648  | -1.341188 |
| 1 | -4.112619 | 3.787659  | 0.640942  |
| 1 | -4.409725 | 2.065628  | 0.601024  |
| 1 | -3.807667 | 3.798431  | -1.865393 |
| 1 | -4.105661 | 2.080959  | -1.915903 |
| 6 | -6.054665 | -2.822031 | 1.080294  |
| 8 | -6.845693 | -2.821477 | 0.166160  |
| 8 | -6.450107 | -2.960150 | 2.364966  |
| 1 | -7.419759 | -3.032991 | 2.330338  |
| 6 | -5.812288 | 3.254512  | -1.450483 |
| 8 | -6.587044 | 3.410939  | -0.536622 |
| 8 | -6.211115 | 3.311319  | -2.741290 |
| 1 | -7.168929 | 3.479555  | -2.707631 |

-----  
**M06-<sup>5</sup>B<sub>Fe(cys)</sub>**  
 -----

Number of imaginary frequencies: 0    Electronic energy:    HF=-3156.2464063  
 Zero-point correction=                    0.853567 (Hartree/Particle)  
 Thermal correction to Energy=            0.915332  
 Thermal correction to Enthalpy=         0.916276  
 Thermal correction to Gibbs Free Energy= 0.751414  
 Sum of electronic and zero-point Energies= -3155.392840  
 Sum of electronic and thermal Energies= -3155.331075  
 Sum of electronic and thermal Enthalpies= -3155.330130  
 Sum of electronic and thermal Free Energies= -3155.494992

.....  
 Cartesian Coordinates  
 .....

|    |           |           |           |
|----|-----------|-----------|-----------|
| 6  | 7.133498  | -3.182998 | -1.096923 |
| 6  | 5.992814  | -3.685389 | -1.706997 |
| 6  | 4.937292  | -2.833361 | -2.015772 |
| 6  | 4.986056  | -1.469668 | -1.709743 |
| 6  | 6.143603  | -0.980015 | -1.063569 |
| 6  | 7.209926  | -1.829606 | -0.778964 |
| 6  | 3.847760  | -0.597740 | -2.025986 |
| 7  | 4.023011  | 0.696377  | -2.179247 |
| 7  | 4.136447  | 1.814808  | -2.341355 |
| 8  | 6.140386  | 0.339905  | -0.741995 |
| 6  | 7.209301  | 0.845825  | 0.014048  |
| 26 | -0.460892 | 0.516151  | 1.193390  |
| 7  | 0.925267  | 2.064552  | 0.655913  |
| 6  | 0.632854  | 3.368099  | 0.430227  |
| 6  | 1.850339  | 4.167790  | 0.429360  |
| 6  | 2.884360  | 3.286381  | 0.644504  |
| 6  | 2.277241  | 1.981916  | 0.797953  |



|    |           |           |           |
|----|-----------|-----------|-----------|
| 6  | -0.654952 | 3.873143  | 0.225578  |
| 6  | -1.833466 | 3.135201  | 0.136528  |
| 7  | -1.909773 | 1.783321  | 0.252367  |
| 6  | -3.206766 | 1.446271  | 0.041045  |
| 6  | -4.008519 | 2.636875  | -0.197541 |
| 6  | -3.146613 | 3.695323  | -0.142148 |
| 6  | 2.991789  | 0.813640  | 1.067988  |
| 6  | 2.487916  | -0.486428 | 1.146396  |
| 7  | 1.193518  | -0.819977 | 0.900945  |
| 6  | 1.135871  | -2.179279 | 0.855992  |
| 6  | 2.443384  | -2.747335 | 1.078557  |
| 6  | 3.290152  | -1.691223 | 1.321744  |
| 6  | -3.697372 | 0.141726  | -0.003693 |
| 6  | -2.962679 | -1.037952 | 0.126891  |
| 7  | -1.638258 | -1.108446 | 0.407800  |
| 6  | -1.306534 | -2.430046 | 0.409791  |
| 6  | -2.473571 | -3.243448 | 0.123549  |
| 6  | -3.510768 | -2.369322 | -0.060494 |
| 6  | -0.022130 | -2.925753 | 0.624108  |
| 6  | 2.452952  | -1.054011 | -2.187392 |
| 8  | 1.634148  | -0.024262 | -2.413391 |
| 8  | 2.104496  | -2.216208 | -2.141482 |
| 1  | 0.098009  | -4.009774 | 0.589886  |
| 1  | 4.073012  | 0.914872  | 1.167894  |
| 1  | -0.746343 | 4.953257  | 0.103596  |
| 1  | -4.761693 | 0.028428  | -0.202563 |
| 1  | 4.037207  | -3.220884 | -2.482949 |
| 1  | 5.917417  | -4.743301 | -1.953131 |
| 1  | 8.096297  | -1.443441 | -0.281825 |
| 1  | 7.970278  | -3.837892 | -0.857520 |
| 1  | 6.972636  | 1.894852  | 0.217129  |
| 1  | 7.308536  | 0.307449  | 0.968422  |
| 1  | 8.159759  | 0.791662  | -0.540029 |
| 6  | -0.318126 | -1.109836 | 3.947150  |
| 1  | 0.744848  | -1.276710 | 3.724706  |
| 1  | -0.475786 | -1.279791 | 5.020056  |
| 1  | -0.904884 | -1.853525 | 3.390874  |
| 16 | -0.832133 | 0.601946  | 3.524796  |
| 6  | -3.435096 | 5.145123  | -0.323440 |
| 1  | -4.501051 | 5.326249  | -0.513163 |
| 1  | -3.154821 | 5.729414  | 0.565281  |
| 1  | -2.875478 | 5.569122  | -1.170554 |
| 6  | -2.479288 | -4.730587 | 0.040643  |
| 1  | -1.782291 | -5.098579 | -0.726585 |
| 1  | -2.173255 | -5.189945 | 0.992113  |
| 1  | -3.475444 | -5.122623 | -0.203351 |
| 6  | 2.764290  | -4.198676 | 1.020369  |
| 1  | 2.225416  | -4.775301 | 1.786939  |
| 1  | 2.480760  | -4.613025 | 0.041199  |
| 1  | 3.836086  | -4.386307 | 1.160776  |

|   |           |           |           |
|---|-----------|-----------|-----------|
| 6 | 4.347912  | 3.554255  | 0.632762  |
| 1 | 4.768181  | 3.656632  | 1.645913  |
| 1 | 4.884811  | 2.735876  | 0.131396  |
| 1 | 4.569853  | 4.482394  | 0.089282  |
| 6 | 1.901189  | 5.597341  | 0.188864  |
| 6 | 2.817770  | 6.456497  | 0.654021  |
| 1 | 1.099509  | 6.002550  | -0.436154 |
| 1 | 2.779018  | 7.514416  | 0.400123  |
| 1 | 3.615767  | 6.143681  | 1.325986  |
| 6 | 4.690716  | -1.792333 | 1.689732  |
| 6 | 5.368608  | -0.962600 | 2.494862  |
| 1 | 5.223057  | -2.663649 | 1.293738  |
| 1 | 6.416742  | -1.148075 | 2.730745  |
| 1 | 4.898165  | -0.103941 | 2.972254  |
| 6 | -4.927075 | -2.677090 | -0.416807 |
| 6 | -5.900350 | -2.499572 | 0.768529  |
| 1 | -5.007119 | -3.712895 | -0.781905 |
| 1 | -5.270612 | -2.028426 | -1.238087 |
| 1 | -5.559077 | -3.105288 | 1.616360  |
| 1 | -5.927885 | -1.445521 | 1.069583  |
| 6 | -5.485268 | 2.621636  | -0.427576 |
| 6 | -5.902442 | 2.006242  | -1.781171 |
| 1 | -5.888690 | 3.641667  | -0.356968 |
| 1 | -5.962510 | 2.053467  | 0.382961  |
| 1 | -6.116283 | 2.772050  | -2.534899 |
| 1 | -5.063465 | 1.408187  | -2.171557 |
| 6 | -7.270971 | -2.926638 | 0.351979  |
| 8 | -8.093755 | -2.256571 | -0.244314 |
| 8 | -7.518298 | -4.215030 | 0.642903  |
| 1 | -8.401377 | -4.405220 | 0.278506  |
| 6 | -7.080928 | 1.066827  | -1.740188 |
| 8 | -7.970278 | 1.022075  | -2.558275 |
| 8 | -6.994338 | 0.220652  | -0.701074 |
| 1 | -7.679020 | -0.483852 | -0.756023 |
| 6 | 0.228744  | -0.332610 | -2.473100 |
| 6 | -0.502368 | 0.963538  | -2.691710 |
| 1 | -0.064818 | -0.802684 | -1.526277 |
| 1 | 0.066422  | -1.057758 | -3.282868 |
| 1 | -1.585523 | 0.784369  | -2.681059 |
| 1 | -0.278248 | 1.663218  | -1.877420 |
| 1 | -0.225512 | 1.423818  | -3.649382 |

---

**M06-<sup>3</sup>TS(B-C)<sub>Fe(cys)</sub>**

---

Number of imaginary frequencies: 1    Electronic energy:    HF=-3156.170865  
Zero-point correction=                    0.852971 (Hartree/Particle)  
Thermal correction to Energy=            0.913071  
Thermal correction to Enthalpy=        0.914016  
Thermal correction to Gibbs Free Energy= 0.759291  
Sum of electronic and zero-point Energies= -3155.317894

|                                              |              |
|----------------------------------------------|--------------|
| Sum of electronic and thermal Energies=      | -3155.257794 |
| Sum of electronic and thermal Enthalpies=    | -3155.256849 |
| Sum of electronic and thermal Free Energies= | -3155.411574 |

.....  
 Cartesian Coordinates  
 .....

|    |           |           |           |
|----|-----------|-----------|-----------|
| 6  | -0.112058 | -4.125408 | 2.990659  |
| 6  | 0.946851  | -3.244116 | 2.839440  |
| 6  | 0.707853  | -1.929191 | 2.450190  |
| 6  | -0.577447 | -1.435313 | 2.181484  |
| 6  | -1.641881 | -2.364293 | 2.337823  |
| 6  | -1.407863 | -3.676441 | 2.748646  |
| 6  | -0.806768 | -0.049904 | 1.692804  |
| 7  | -2.264630 | 0.481878  | 2.551926  |
| 7  | -3.142763 | 1.119213  | 2.195441  |
| 8  | -2.895075 | -1.918778 | 2.066785  |
| 6  | -3.991331 | -2.736986 | 2.340205  |
| 26 | -0.713888 | 0.086497  | -0.590184 |
| 7  | -2.245795 | 1.352472  | -0.625792 |
| 6  | -2.198278 | 2.709958  | -0.624717 |
| 6  | -3.535491 | 3.275382  | -0.613872 |
| 6  | -4.398034 | 2.211233  | -0.595440 |
| 6  | -3.574394 | 1.028212  | -0.623415 |
| 6  | -1.039932 | 3.471266  | -0.677569 |
| 6  | 0.243764  | 2.961298  | -0.644934 |
| 7  | 0.561608  | 1.640456  | -0.536436 |
| 6  | 1.922558  | 1.583057  | -0.546132 |
| 6  | 2.492056  | 2.909980  | -0.625063 |
| 6  | 1.439355  | 3.775003  | -0.694085 |
| 6  | -4.089423 | -0.251566 | -0.708988 |
| 6  | -3.337686 | -1.411736 | -0.829880 |
| 7  | -1.983016 | -1.466073 | -0.738590 |
| 6  | -1.645920 | -2.784639 | -0.806279 |
| 6  | -2.817863 | -3.603243 | -0.929385 |
| 6  | -3.889878 | -2.744236 | -0.980270 |
| 6  | 2.677646  | 0.426866  | -0.494317 |
| 6  | 2.160708  | -0.856911 | -0.489028 |
| 7  | 0.842994  | -1.174541 | -0.569400 |
| 6  | 0.793566  | -2.538188 | -0.629758 |
| 6  | 2.121873  | -3.106109 | -0.536829 |
| 6  | 2.978740  | -2.051377 | -0.435568 |
| 6  | -0.355322 | -3.292472 | -0.750986 |
| 6  | 0.166291  | 0.975133  | 2.155138  |
| 8  | -0.417049 | 2.187769  | 2.308812  |
| 8  | 1.361258  | 0.835919  | 2.357724  |
| 1  | -0.243870 | -4.376094 | -0.781121 |
| 1  | -5.171797 | -0.358888 | -0.700403 |
| 1  | -1.147978 | 4.552975  | -0.754038 |
| 1  | 3.759049  | 0.531288  | -0.466056 |
| 1  | 1.543087  | -1.245773 | 2.340956  |

|    |           |           |           |
|----|-----------|-----------|-----------|
| 1  | 1.972009  | -3.569309 | 3.020040  |
| 1  | -2.243271 | -4.362783 | 2.868742  |
| 1  | 0.053729  | -5.157274 | 3.301423  |
| 1  | -4.879260 | -2.153019 | 2.072738  |
| 1  | -3.983678 | -3.657675 | 1.731585  |
| 1  | -4.039727 | -3.013013 | 3.406977  |
| 6  | -2.114973 | 0.524915  | -3.609025 |
| 1  | -2.426653 | 1.526128  | -3.281919 |
| 1  | -2.041488 | 0.524080  | -4.704737 |
| 1  | -2.890885 | -0.195812 | -3.313687 |
| 16 | -0.491547 | 0.061732  | -2.927393 |
| 6  | 1.451675  | 5.262355  | -0.766214 |
| 1  | 2.475099  | 5.653534  | -0.829937 |
| 1  | 0.901555  | 5.635118  | -1.642265 |
| 1  | 0.982876  | 5.715926  | 0.121317  |
| 6  | 2.417509  | -4.563983 | -0.503924 |
| 1  | 1.938280  | -5.044205 | 0.363249  |
| 1  | 2.046332  | -5.077380 | -1.402844 |
| 1  | 3.496191  | -4.758447 | -0.440310 |
| 6  | -2.816595 | -5.091223 | -0.975884 |
| 1  | -2.278012 | -5.477255 | -1.853789 |
| 1  | -2.323083 | -5.512956 | -0.086342 |
| 1  | -3.835548 | -5.496592 | -1.017768 |
| 6  | -5.880111 | 2.215275  | -0.472418 |
| 1  | -6.388101 | 2.086855  | -1.441356 |
| 1  | -6.223694 | 1.405192  | 0.185054  |
| 1  | -6.228521 | 3.165038  | -0.045763 |
| 6  | -3.828153 | 4.695380  | -0.563413 |
| 6  | -4.914843 | 5.303958  | -1.055967 |
| 1  | -3.079445 | 5.318118  | -0.063665 |
| 1  | -5.060508 | 6.376870  | -0.943443 |
| 1  | -5.680894 | 4.761005  | -1.608223 |
| 6  | -5.284152 | -3.126195 | -1.125248 |
| 6  | -6.253891 | -2.452951 | -1.757369 |
| 1  | -5.549032 | -4.093748 | -0.683627 |
| 1  | -7.270443 | -2.839979 | -1.800564 |
| 1  | -6.062908 | -1.513936 | -2.274559 |
| 6  | 4.460098  | -2.071351 | -0.258529 |
| 6  | 5.236335  | -1.755167 | -1.555039 |
| 1  | 4.776518  | -3.062209 | 0.102573  |
| 1  | 4.766334  | -1.346142 | 0.510857  |
| 1  | 4.922574  | -2.445782 | -2.347055 |
| 1  | 5.027195  | -0.726229 | -1.871169 |
| 6  | 3.958886  | 3.187680  | -0.612589 |
| 6  | 4.633605  | 2.853314  | 0.736954  |
| 1  | 4.144208  | 4.242622  | -0.859150 |
| 1  | 4.441865  | 2.604250  | -1.408602 |
| 1  | 4.777528  | 3.745958  | 1.355808  |
| 1  | 3.974591  | 2.179398  | 1.309320  |
| 6  | 6.702137  | -1.899758 | -1.298774 |

|   |           |           |           |
|---|-----------|-----------|-----------|
| 8 | 7.442282  | -1.067517 | -0.808952 |
| 8 | 7.157834  | -3.126879 | -1.605511 |
| 1 | 8.095508  | -3.135011 | -1.341946 |
| 6 | 5.963778  | 2.152292  | 0.635267  |
| 8 | 6.940787  | 2.392393  | 1.305547  |
| 8 | 5.925135  | 1.165139  | -0.276673 |
| 1 | 6.749473  | 0.630385  | -0.262610 |
| 6 | 0.441568  | 3.249960  | 2.692360  |
| 6 | -0.421484 | 4.482296  | 2.809242  |
| 1 | 1.233395  | 3.377584  | 1.937968  |
| 1 | 0.937820  | 3.000274  | 3.641957  |
| 1 | 0.183741  | 5.358647  | 3.076076  |
| 1 | -0.926181 | 4.676296  | 1.852604  |
| 1 | -1.196814 | 4.344766  | 3.573044  |

---

**M06-10SSC<sub>Fe(cys)</sub>**

---

Number of imaginary frequencies: 0    Electronic energy:    HF=-3156.2127576  
Zero-point correction=                    0.851668 (Hartree/Particle)  
Thermal correction to Energy=            0.913756  
Thermal correction to Enthalpy=         0.914700  
Thermal correction to Gibbs Free Energy=    0.752316  
Sum of electronic and zero-point Energies=    -3155.361090  
Sum of electronic and thermal Energies=    -3155.299001  
Sum of electronic and thermal Enthalpies=   -3155.298057  
Sum of electronic and thermal Free Energies= -3155.460441

---

Cartesian Coordinates

---

|    |           |           |           |
|----|-----------|-----------|-----------|
| 6  | -0.980687 | -3.694972 | 3.510973  |
| 6  | 0.280123  | -3.181286 | 3.241804  |
| 6  | 0.399621  | -1.970380 | 2.564009  |
| 6  | -0.722422 | -1.253914 | 2.132716  |
| 6  | -1.993320 | -1.758475 | 2.479302  |
| 6  | -2.119800 | -2.978149 | 3.142858  |
| 6  | -0.567501 | -0.056862 | 1.298277  |
| 8  | -3.052434 | -0.970784 | 2.150170  |
| 6  | -4.334745 | -1.453507 | 2.435947  |
| 26 | -0.553859 | -0.139290 | -0.662840 |
| 7  | -2.024517 | 1.198964  | -0.948327 |
| 6  | -1.908435 | 2.545372  | -1.088489 |
| 6  | -3.197401 | 3.148361  | -1.369860 |
| 6  | -4.099081 | 2.111782  | -1.407926 |
| 6  | -3.343661 | 0.913141  | -1.146102 |
| 6  | -0.715555 | 3.252029  | -1.035193 |
| 6  | 0.531643  | 2.686245  | -0.851689 |
| 7  | 0.783082  | 1.350651  | -0.724683 |
| 6  | 2.131947  | 1.239342  | -0.577269 |
| 6  | 2.756959  | 2.544931  | -0.578686 |
| 6  | 1.755117  | 3.451536  | -0.760751 |

|    |           |           |           |
|----|-----------|-----------|-----------|
| 6  | -3.910841 | -0.349468 | -1.086906 |
| 6  | -3.236591 | -1.528229 | -0.826001 |
| 7  | -1.889440 | -1.638210 | -0.675225 |
| 6  | -1.630186 | -2.969024 | -0.544175 |
| 6  | -2.848328 | -3.735791 | -0.568840 |
| 6  | -3.870640 | -2.836208 | -0.736823 |
| 6  | 2.830492  | 0.050783  | -0.441007 |
| 6  | 2.267267  | -1.214021 | -0.414197 |
| 7  | 0.936832  | -1.480597 | -0.486006 |
| 6  | 0.818355  | -2.833830 | -0.405361 |
| 6  | 2.117707  | -3.455691 | -0.278738 |
| 6  | 3.027564  | -2.440910 | -0.280250 |
| 6  | -0.371316 | -3.536582 | -0.423505 |
| 6  | 0.125670  | 1.063999  | 1.945684  |
| 8  | -0.622024 | 2.188555  | 1.964553  |
| 8  | 1.253551  | 1.032277  | 2.409410  |
| 1  | -0.315443 | -4.620659 | -0.329531 |
| 1  | -4.972866 | -0.426837 | -1.302490 |
| 1  | -0.757467 | 4.332215  | -1.174176 |
| 1  | 3.913972  | 0.116989  | -0.340721 |
| 1  | 1.381831  | -1.563060 | 2.329527  |
| 1  | 1.176364  | -3.723280 | 3.543446  |
| 1  | -3.103300 | -3.376097 | 3.383123  |
| 1  | -1.093476 | -4.648618 | 4.027156  |
| 1  | -5.036693 | -0.692179 | 2.079685  |
| 1  | -4.542067 | -2.399518 | 1.909856  |
| 1  | -4.482686 | -1.601339 | 3.519116  |
| 16 | -0.414437 | -0.474667 | -2.992384 |
| 6  | 0.003183  | 1.124551  | -3.760259 |
| 1  | -0.778827 | 1.874619  | -3.573796 |
| 1  | 0.957172  | 1.521616  | -3.384988 |
| 1  | 0.091601  | 0.981579  | -4.845455 |
| 6  | 1.843141  | 4.938144  | -0.795731 |
| 1  | 1.391517  | 5.356619  | -1.707121 |
| 1  | 1.320958  | 5.401213  | 0.057271  |
| 1  | 2.887006  | 5.277258  | -0.761840 |
| 6  | 2.352727  | -4.921132 | -0.164307 |
| 1  | 1.831015  | -5.346402 | 0.706539  |
| 1  | 1.990230  | -5.464651 | -1.049398 |
| 1  | 3.420803  | -5.150234 | -0.053211 |
| 6  | -5.574953 | 2.179901  | -1.583850 |
| 1  | -5.878384 | 2.103034  | -2.639430 |
| 1  | -6.083798 | 1.371862  | -1.040580 |
| 1  | -5.964697 | 3.134985  | -1.204265 |
| 6  | -2.923259 | -5.206184 | -0.354315 |
| 1  | -2.284379 | -5.756711 | -1.059803 |
| 1  | -2.584766 | -5.470484 | 0.659716  |
| 1  | -3.946671 | -5.584978 | -0.466825 |
| 6  | -5.282588 | -3.171895 | -0.798552 |
| 6  | -6.341451 | -2.430590 | -0.443067 |

|   |           |           |           |
|---|-----------|-----------|-----------|
| 1 | -5.490800 | -4.184535 | -1.159577 |
| 1 | -7.352546 | -2.820582 | -0.546555 |
| 1 | -6.246827 | -1.428716 | -0.026505 |
| 6 | -3.424480 | 4.571241  | -1.524377 |
| 6 | -4.424415 | 5.162482  | -2.193209 |
| 1 | -2.695843 | 5.223696  | -1.033067 |
| 1 | -4.514388 | 6.246839  | -2.224656 |
| 1 | -5.165428 | 4.594925  | -2.753716 |
| 6 | 4.515481  | -2.539134 | -0.239561 |
| 6 | 5.111522  | -2.544545 | -1.642952 |
| 1 | 4.830186  | -3.453955 | 0.282983  |
| 1 | 4.955141  | -1.711542 | 0.336301  |
| 1 | 4.686972  | -3.368263 | -2.238764 |
| 1 | 4.837247  | -1.633036 | -2.195012 |
| 6 | 4.184491  | 2.810340  | -0.241970 |
| 6 | 4.352437  | 2.901733  | 1.272435  |
| 1 | 4.535125  | 3.745109  | -0.703997 |
| 1 | 4.847858  | 2.025985  | -0.632596 |
| 1 | 3.771423  | 3.744981  | 1.678534  |
| 1 | 3.921576  | 2.016344  | 1.767686  |
| 6 | 6.603374  | -2.684433 | -1.652001 |
| 8 | 7.316518  | -2.859359 | -0.692049 |
| 8 | 7.102520  | -2.602284 | -2.905335 |
| 1 | 8.065296  | -2.702213 | -2.806048 |
| 6 | 5.777781  | 3.061242  | 1.701867  |
| 8 | 6.750314  | 3.068078  | 0.983197  |
| 8 | 5.882311  | 3.208142  | 3.041068  |
| 1 | 6.836102  | 3.285274  | 3.217140  |
| 6 | 0.020979  | 3.354357  | 2.461274  |
| 6 | -0.983727 | 4.477252  | 2.391104  |
| 1 | 0.910599  | 3.561722  | 1.844438  |
| 1 | 0.375016  | 3.175485  | 3.486938  |
| 1 | -0.530335 | 5.426315  | 2.706279  |
| 1 | -1.352819 | 4.583743  | 1.361521  |
| 1 | -1.847620 | 4.268446  | 3.033762  |
| 7 | -3.622012 | 2.197714  | 2.158772  |
| 7 | -4.461202 | 1.713610  | 1.625897  |

---

**M06-<sup>1</sup>OSS<sup>r</sup>TS(C-D)<sub>Fe(cys)</sub>**

---

Number of imaginary frequencies: 1    Electronic energy:    HF=-3046.724714  
Zero-point correction=                    0.840839 (Hartree/Particle)  
Thermal correction to Energy=            0.898025  
Thermal correction to Enthalpy=         0.898969  
Thermal correction to Gibbs Free Energy= 0.751089  
Sum of electronic and zero-point Energies= -3045.883875  
Sum of electronic and thermal Energies= -3045.826689  
Sum of electronic and thermal Enthalpies= -3045.825745  
Sum of electronic and thermal Free Energies= -3045.973625

---

Cartesian Coordinates

|    |           |           |           |
|----|-----------|-----------|-----------|
| 6  | 3.027106  | 0.794259  | 3.367216  |
| 6  | 2.184047  | 1.847392  | 3.018137  |
| 6  | 0.934289  | 1.592949  | 2.464132  |
| 6  | 0.473223  | 0.285663  | 2.258226  |
| 6  | 1.309227  | -0.756263 | 2.707092  |
| 6  | 2.576083  | -0.512974 | 3.225431  |
| 6  | -0.797057 | -0.030346 | 1.574940  |
| 8  | 0.921681  | -2.073624 | 2.618208  |
| 6  | -0.442082 | -2.284325 | 2.679106  |
| 26 | -0.798198 | -0.075074 | -0.498802 |
| 7  | -2.442778 | 1.066174  | -0.586887 |
| 6  | -2.494637 | 2.422377  | -0.614197 |
| 6  | -3.867476 | 2.886741  | -0.653578 |
| 6  | -4.652215 | 1.759168  | -0.642714 |
| 6  | -3.743570 | 0.641875  | -0.610524 |
| 6  | -1.391960 | 3.265340  | -0.632720 |
| 6  | -0.072825 | 2.858101  | -0.618567 |
| 7  | 0.356394  | 1.568120  | -0.543681 |
| 6  | 1.713859  | 1.624032  | -0.597571 |
| 6  | 2.174127  | 2.995335  | -0.700689 |
| 6  | 1.051236  | 3.768744  | -0.703632 |
| 6  | -4.152639 | -0.680548 | -0.628294 |
| 6  | -3.312560 | -1.781904 | -0.620764 |
| 7  | -1.953290 | -1.721833 | -0.532984 |
| 6  | -1.518221 | -3.012931 | -0.494659 |
| 6  | -2.625410 | -3.927572 | -0.528197 |
| 6  | -3.760473 | -3.161986 | -0.637718 |
| 6  | 2.554536  | 0.527362  | -0.541158 |
| 6  | 2.139313  | -0.789087 | -0.436510 |
| 7  | 0.849104  | -1.211190 | -0.453997 |
| 6  | 0.902439  | -2.572779 | -0.403072 |
| 6  | 2.272898  | -3.030508 | -0.302121 |
| 6  | 3.047428  | -1.911140 | -0.310324 |
| 6  | -0.189779 | -3.416223 | -0.428125 |
| 6  | -1.983360 | 0.612979  | 2.153684  |
| 8  | -3.011588 | -0.269514 | 2.300546  |
| 8  | -2.101006 | 1.779343  | 2.483523  |
| 1  | 0.003914  | -4.488496 | -0.389013 |
| 1  | -5.222963 | -0.873399 | -0.644514 |
| 1  | -1.580438 | 4.336326  | -0.691550 |
| 1  | 3.625183  | 0.708225  | -0.571675 |
| 1  | 0.282493  | 2.411224  | 2.164398  |
| 1  | 2.506533  | 2.879569  | 3.162623  |
| 1  | 3.186344  | -1.367119 | 3.517250  |
| 1  | 4.027903  | 0.987395  | 3.750877  |
| 1  | -0.896070 | -2.032101 | 3.647737  |
| 1  | -0.925892 | -1.276137 | 1.817812  |
| 1  | -0.703369 | -3.263005 | 2.273772  |



|    |           |           |           |
|----|-----------|-----------|-----------|
| 6  | -2.271192 | 0.038266  | -3.534591 |
| 1  | -2.722253 | 0.999631  | -3.252034 |
| 1  | -2.192913 | 0.001182  | -4.629322 |
| 1  | -2.942907 | -0.768527 | -3.208247 |
| 16 | -0.603154 | -0.159961 | -2.829126 |
| 6  | 0.925181  | 5.249929  | -0.792792 |
| 1  | 1.906243  | 5.740589  | -0.819512 |
| 1  | 0.379603  | 5.558525  | -1.696725 |
| 1  | 0.376405  | 5.661975  | 0.066806  |
| 6  | 2.683722  | -4.453049 | -0.156324 |
| 1  | 2.315603  | -5.073148 | -0.986749 |
| 1  | 3.776278  | -4.557756 | -0.130509 |
| 1  | 2.286577  | -4.889704 | 0.772620  |
| 6  | -2.508380 | -5.411769 | -0.497370 |
| 1  | -1.938097 | -5.756082 | 0.378368  |
| 1  | -3.492957 | -5.894555 | -0.463171 |
| 1  | -1.989182 | -5.799042 | -1.386727 |
| 6  | -6.137287 | 1.664810  | -0.598668 |
| 1  | -6.585651 | 1.562022  | -1.599455 |
| 1  | -6.471034 | 0.800641  | -0.007239 |
| 1  | -6.567145 | 2.568254  | -0.144786 |
| 6  | -4.267289 | 4.280717  | -0.648972 |
| 6  | -5.390855 | 4.793475  | -1.168169 |
| 1  | -3.573063 | 4.971142  | -0.161420 |
| 1  | -5.613320 | 5.856169  | -1.089123 |
| 1  | -6.110510 | 4.183052  | -1.711911 |
| 6  | -5.120032 | -3.665201 | -0.740965 |
| 6  | -6.136882 | -3.140512 | -1.436823 |
| 1  | -5.309909 | -4.600890 | -0.204358 |
| 1  | -7.117892 | -3.612464 | -1.438477 |
| 1  | -6.020645 | -2.247924 | -2.049469 |
| 6  | 4.526519  | -1.800703 | -0.160763 |
| 6  | 5.239493  | -1.561469 | -1.508261 |
| 1  | 4.928201  | -2.723053 | 0.283662  |
| 1  | 4.783158  | -0.982900 | 0.531007  |
| 1  | 5.001657  | -2.389580 | -2.189658 |
| 1  | 4.896064  | -0.625264 | -1.964978 |
| 6  | 3.597839  | 3.438700  | -0.822252 |
| 6  | 4.504091  | 3.094263  | 0.378429  |
| 1  | 3.604428  | 4.527623  | -0.967573 |
| 1  | 4.047305  | 3.021269  | -1.734552 |
| 1  | 5.133545  | 3.963359  | 0.626285  |
| 1  | 3.915792  | 2.864933  | 1.275476  |
| 6  | 6.717833  | -1.489121 | -1.311275 |
| 8  | 7.403043  | -0.483405 | -1.276193 |
| 8  | 7.269564  | -2.698708 | -1.124360 |
| 1  | 8.212470  | -2.536638 | -0.943023 |
| 6  | 5.466230  | 1.948395  | 0.194864  |
| 8  | 5.807576  | 1.193893  | 1.081185  |
| 8  | 5.947837  | 1.865900  | -1.052724 |

|   |           |           |           |
|---|-----------|-----------|-----------|
| 1 | 6.555032  | 1.085861  | -1.089313 |
| 6 | -4.239843 | 0.287670  | 2.742985  |
| 6 | -5.243294 | -0.837753 | 2.801579  |
| 1 | -4.551313 | 1.079753  | 2.044373  |
| 1 | -4.098424 | 0.765311  | 3.723918  |
| 1 | -6.226634 | -0.465929 | 3.118218  |
| 1 | -5.346128 | -1.310356 | 1.815150  |
| 1 | -4.919660 | -1.610907 | 3.510218  |

-----  
**M06-<sup>5</sup>A<sub>Fe(his)</sub>**  
 -----

Number of imaginary frequencies: 0    Electronic energy:    HF=-2183.1626512  
 Zero-point correction=                    0.666249 (Hartree/Particle)  
 Thermal correction to Energy=            0.712885  
 Thermal correction to Enthalpy=         0.713829  
 Thermal correction to Gibbs Free Energy= 0.579596  
 Sum of electronic and zero-point Energies= -2182.496402  
 Sum of electronic and thermal Energies= -2182.449766  
 Sum of electronic and thermal Enthalpies= -2182.448822  
 Sum of electronic and thermal Free Energies= -2182.583056

.....  
 Cartesian Coordinates  
 .....

|   |           |           |           |
|---|-----------|-----------|-----------|
| 6 | -1.632420 | -3.438629 | -0.733803 |
| 6 | -0.344657 | -2.781984 | -0.694660 |
| 7 | -0.514960 | -1.434124 | -0.554585 |
| 6 | -1.856318 | -1.204508 | -0.480930 |
| 6 | -2.576306 | -2.453919 | -0.609262 |
| 6 | 0.885100  | -3.435385 | -0.774364 |
| 6 | 2.157570  | -2.860883 | -0.753552 |
| 7 | 2.405321  | -1.528486 | -0.605376 |
| 6 | 3.753659  | -1.355424 | -0.672945 |
| 6 | 4.405101  | -2.644094 | -0.878532 |
| 6 | 3.400984  | -3.582925 | -0.901012 |
| 6 | 4.392725  | -0.128544 | -0.500626 |
| 6 | 3.801476  | 1.127710  | -0.339384 |
| 7 | 2.456268  | 1.367916  | -0.305287 |
| 6 | 2.290408  | 2.703902  | -0.108623 |
| 6 | 3.583789  | 3.355627  | -0.033475 |
| 6 | 4.529325  | 2.362829  | -0.182004 |
| 6 | 1.056873  | 3.347599  | 0.038538  |
| 6 | -0.209362 | 2.770416  | 0.005766  |
| 7 | -0.451759 | 1.437392  | -0.138611 |
| 6 | -1.802426 | 1.274136  | -0.141594 |
| 6 | -2.458010 | 2.560571  | 0.030065  |
| 6 | -1.464084 | 3.494212  | 0.116054  |
| 6 | -1.592236 | 4.970695  | 0.259169  |
| 6 | -3.932540 | 2.786998  | 0.022957  |
| 6 | -4.469519 | 2.962004  | -1.393063 |
| 6 | -5.955154 | 3.173147  | -1.427910 |

|   |           |           |           |
|---|-----------|-----------|-----------|
| 8 | -6.690480 | 3.205690  | -0.470580 |
| 6 | -2.448439 | 0.047265  | -0.288193 |
| 6 | 6.009457  | 2.506331  | -0.238597 |
| 6 | 3.777913  | 4.785764  | 0.128219  |
| 6 | 4.832379  | 5.387323  | 0.691681  |
| 6 | 3.516424  | -5.051984 | -1.112980 |
| 6 | 5.825480  | -2.906775 | -1.050770 |
| 6 | 6.721374  | -2.117102 | -1.654198 |
| 6 | -4.058369 | -2.613664 | -0.540572 |
| 6 | -4.541979 | -2.777150 | 0.895927  |
| 6 | -6.031266 | -2.936688 | 0.993975  |
| 8 | -6.806371 | -2.956375 | 0.068723  |
| 6 | -1.845441 | -4.906130 | -0.873238 |
| 8 | -6.399760 | 3.329718  | -2.690209 |
| 8 | -6.428300 | -3.063067 | 2.276186  |
| 1 | 1.089314  | 4.425924  | 0.195980  |
| 1 | -3.539151 | 0.065443  | -0.257351 |
| 1 | 0.846713  | -4.520017 | -0.885816 |
| 1 | 5.480429  | -0.155701 | -0.479899 |
| 1 | 6.466646  | 1.744925  | -0.884066 |
| 1 | 6.288992  | 3.492525  | -0.632609 |
| 1 | 6.478206  | 2.412173  | 0.752754  |
| 1 | 4.561501  | -5.383350 | -1.102805 |
| 1 | 2.979571  | -5.619407 | -0.339344 |
| 1 | 3.092157  | -5.354990 | -2.081413 |
| 1 | -1.370845 | -5.303401 | -1.781806 |
| 1 | -1.422393 | -5.462447 | -0.023925 |
| 1 | -2.912603 | -5.155346 | -0.926598 |
| 1 | -2.639616 | 5.274910  | 0.379241  |
| 1 | -1.038952 | 5.348035  | 1.131204  |
| 1 | -1.196755 | 5.499349  | -0.620503 |
| 1 | 2.974854  | 5.421955  | -0.254206 |
| 1 | 4.895823  | 6.471819  | 0.749678  |
| 1 | 5.652975  | 4.827346  | 1.137072  |
| 1 | 6.174653  | -3.871101 | -0.669334 |
| 1 | 7.765048  | -2.412917 | -1.736330 |
| 1 | 6.443418  | -1.171124 | -2.116929 |
| 1 | -4.463764 | 1.955042  | 0.507504  |
| 1 | -4.192497 | 3.676147  | 0.614716  |
| 1 | -3.985305 | 3.814671  | -1.893901 |
| 1 | -4.226779 | 2.090686  | -2.020585 |
| 1 | -7.362899 | 3.453780  | -2.621135 |
| 1 | -4.383079 | -3.485068 | -1.126548 |
| 1 | -4.571254 | -1.755336 | -0.997433 |
| 1 | -4.068672 | -3.650057 | 1.372160  |
| 1 | -4.241848 | -1.918857 | 1.516405  |
| 1 | -7.396982 | -3.156305 | 2.247137  |
| 7 | 1.084424  | -0.338208 | 1.976080  |
| 6 | 1.910015  | -1.150566 | 2.596538  |
| 6 | 0.375572  | 0.323622  | 2.947770  |

|    |           |           |           |
|----|-----------|-----------|-----------|
| 7  | 1.762610  | -1.042395 | 3.938003  |
| 1  | 2.616041  | -1.816324 | 2.111059  |
| 6  | 0.782553  | -0.101276 | 4.179494  |
| 1  | -0.375363 | 1.059225  | 2.681746  |
| 1  | 2.282591  | -1.555657 | 4.635600  |
| 1  | 0.478876  | 0.168021  | 5.181328  |
| 26 | 0.980347  | -0.068159 | -0.174491 |

-----  
**M06-<sup>5</sup>B<sub>Fe(his)</sub>**  
 -----

Number of imaginary frequencies: 0    Electronic energy:    HF=-2944.2216418  
 Zero-point correction=                    0.890116 (Hartree/Particle)  
 Thermal correction to Energy=            0.951134  
 Thermal correction to Enthalpy=         0.952078  
 Thermal correction to Gibbs Free Energy= 0.792011  
 Sum of electronic and zero-point Energies= -2943.331526  
 Sum of electronic and thermal Energies= -2943.270508  
 Sum of electronic and thermal Enthalpies= -2943.269564  
 Sum of electronic and thermal Free Energies= -2943.429631

-----  
 Cartesian Coordinates  
 -----

|   |           |           |           |
|---|-----------|-----------|-----------|
| 6 | 2.571846  | 3.553322  | 1.226697  |
| 6 | 2.202549  | 2.156098  | 1.226185  |
| 7 | 0.898668  | 2.017232  | 0.850599  |
| 6 | 0.417483  | 3.260099  | 0.585170  |
| 6 | 1.467152  | 4.249881  | 0.801200  |
| 6 | 3.073888  | 1.105280  | 1.510747  |
| 6 | 2.849014  | -0.262703 | 1.340278  |
| 7 | 1.688204  | -0.815091 | 0.893427  |
| 6 | 1.882004  | -2.163046 | 0.813181  |
| 6 | 3.226866  | -2.494253 | 1.219574  |
| 6 | 3.829891  | -1.305542 | 1.575024  |
| 6 | 0.908145  | -3.090697 | 0.425514  |
| 6 | -0.412511 | -2.829728 | 0.069759  |
| 7 | -0.964384 | -1.585996 | 0.005783  |
| 6 | -2.259832 | -1.741266 | -0.380721 |
| 6 | -2.564227 | -3.153663 | -0.543243 |
| 6 | -1.409920 | -3.833329 | -0.270526 |
| 7 | -1.708321 | 1.233267  | -0.148388 |
| 6 | -2.891814 | 0.676456  | -0.527870 |
| 6 | -3.857053 | 1.718886  | -0.801721 |
| 6 | -3.229891 | 2.911502  | -0.548431 |
| 6 | -1.880158 | 2.586334  | -0.139451 |
| 6 | -3.147840 | -0.694268 | -0.626823 |
| 6 | -0.898163 | 3.521477  | 0.196817  |
| 8 | 5.929123  | -1.567654 | -1.140988 |
| 6 | 5.247164  | -0.403592 | -1.175561 |
| 8 | 5.694247  | 0.642565  | -0.747535 |
| 6 | 3.926039  | -0.575594 | -1.793753 |

|   |           |           |           |
|---|-----------|-----------|-----------|
| 7 | 3.657832  | -1.833723 | -2.088892 |
| 7 | 3.510574  | -2.938905 | -2.301148 |
| 6 | 2.967588  | 0.506894  | -2.076041 |
| 6 | 3.367800  | 1.845348  | -2.005059 |
| 6 | 2.480156  | 2.885182  | -2.262090 |
| 6 | 1.166050  | 2.604367  | -2.604053 |
| 6 | 0.739059  | 1.282392  | -2.691288 |
| 6 | 1.624119  | 0.239311  | -2.427821 |
| 8 | 1.266237  | -1.068242 | -2.487320 |
| 6 | 0.010769  | -1.398103 | -3.034650 |
| 1 | -1.185198 | 4.570628  | 0.136371  |
| 1 | -4.152821 | -0.974857 | -0.939696 |
| 1 | 1.213424  | -4.137592 | 0.420406  |
| 1 | 4.072550  | 1.391902  | 1.839208  |
| 1 | 4.394268  | 2.066273  | -1.731235 |
| 1 | 2.821525  | 3.916452  | -2.178860 |
| 1 | -0.296098 | 1.066825  | -2.944872 |
| 1 | 0.456808  | 3.407858  | -2.799031 |
| 1 | -0.046611 | -2.490888 | -3.023507 |
| 1 | -0.813533 | -0.998137 | -2.427224 |
| 1 | -0.075487 | -1.032175 | -4.069279 |
| 6 | 7.267670  | -1.510870 | -0.634816 |
| 1 | 7.464898  | -2.523934 | -0.266070 |
| 1 | 7.302971  | -0.820279 | 0.215347  |
| 6 | 8.233739  | -1.103744 | -1.721192 |
| 1 | 8.025253  | -0.080875 | -2.055647 |
| 1 | 9.264593  | -1.137819 | -1.347568 |
| 1 | 8.157308  | -1.777265 | -2.583210 |
| 6 | 3.941497  | 4.065771  | 1.501083  |
| 1 | 3.987077  | 5.159795  | 1.446984  |
| 1 | 4.303236  | 3.765012  | 2.494885  |
| 1 | 4.661357  | 3.669496  | 0.768540  |
| 6 | 3.831781  | -3.853545 | 1.186973  |
| 1 | 4.914571  | -3.788766 | 1.011630  |
| 1 | 3.689801  | -4.400921 | 2.131285  |
| 1 | 3.401040  | -4.467109 | 0.385357  |
| 6 | 1.408541  | 5.680170  | 0.546005  |
| 6 | 0.714384  | 6.293135  | -0.420451 |
| 1 | 2.033502  | 6.301094  | 1.194732  |
| 1 | 0.747554  | 7.374231  | -0.537785 |
| 1 | 0.115147  | 5.740846  | -1.143332 |
| 6 | 5.181266  | -1.074468 | 2.054768  |
| 6 | 5.925097  | -1.931205 | 2.765636  |
| 1 | 5.620247  | -0.107145 | 1.791928  |
| 1 | 6.939747  | -1.676794 | 3.067002  |
| 1 | 5.546408  | -2.897340 | 3.095712  |
| 6 | -3.786834 | 4.288859  | -0.652187 |
| 1 | -4.825516 | 4.281665  | -1.006332 |
| 1 | -3.777583 | 4.804133  | 0.319059  |
| 1 | -3.206282 | 4.913887  | -1.346276 |

|    |           |           |           |
|----|-----------|-----------|-----------|
| 6  | -5.266067 | 1.496637  | -1.241625 |
| 1  | -5.630072 | 2.366861  | -1.808127 |
| 1  | -5.329428 | 0.633981  | -1.922307 |
| 6  | -3.924197 | -3.673000 | -0.876569 |
| 1  | -3.862095 | -4.711607 | -1.228289 |
| 1  | -4.341765 | -3.096375 | -1.713266 |
| 6  | -4.889992 | -3.597241 | 0.327123  |
| 1  | -4.472526 | -2.898424 | 1.070329  |
| 1  | -4.994422 | -4.565243 | 0.828700  |
| 6  | -6.214787 | 1.250908  | -0.051520 |
| 1  | -5.904461 | 0.346802  | 0.485858  |
| 1  | -6.172460 | 2.109275  | 0.631174  |
| 6  | -6.276514 | -3.081064 | 0.034902  |
| 8  | -7.300412 | -3.551839 | 0.466568  |
| 8  | -6.233277 | -1.967913 | -0.717574 |
| 1  | -7.127613 | -1.555931 | -0.773296 |
| 6  | -7.614616 | 1.064088  | -0.549551 |
| 8  | -8.131471 | 0.011186  | -0.870054 |
| 8  | -8.264503 | 2.228340  | -0.681234 |
| 1  | -9.138252 | 2.016403  | -1.057437 |
| 6  | -1.167818 | -5.302391 | -0.287184 |
| 1  | -0.859713 | -5.674985 | 0.700402  |
| 1  | -2.067463 | -5.857469 | -0.579808 |
| 1  | -0.368921 | -5.574960 | -0.991806 |
| 7  | -0.819651 | 0.048381  | 2.629261  |
| 6  | -0.594140 | 0.933298  | 3.573233  |
| 6  | -1.617691 | -0.923065 | 3.180781  |
| 7  | -1.216927 | 0.573219  | 4.720630  |
| 1  | 0.004394  | 1.830357  | 3.456794  |
| 6  | -1.876634 | -0.615850 | 4.485538  |
| 1  | -1.943011 | -1.774113 | 2.591781  |
| 1  | -1.197412 | 1.083544  | 5.592211  |
| 1  | -2.452031 | -1.115240 | 5.252405  |
| 26 | -0.076292 | 0.201457  | 0.585785  |

---

**M06-<sup>1</sup>CSS<sup>T</sup>S(B-C)<sub>Fe(his)</sub>**

---

Number of imaginary frequencies: 1    Electronic energy:    HF=-2944.1499078  
Zero-point correction=                    0.889657 (Hartree/Particle)  
Thermal correction to Energy=            0.950554  
Thermal correction to Enthalpy=        0.951498  
Thermal correction to Gibbs Free Energy= 0.794483  
Sum of electronic and zero-point Energies= -2943.260251  
Sum of electronic and thermal Energies= -2943.199354  
Sum of electronic and thermal Enthalpies= -2943.198410  
Sum of electronic and thermal Free Energies= -2943.355425

---

Cartesian Coordinates

---

|   |          |           |           |
|---|----------|-----------|-----------|
| 6 | 3.321439 | -3.610822 | -0.583853 |
|---|----------|-----------|-----------|

|   |           |           |           |
|---|-----------|-----------|-----------|
| 6 | 2.079681  | -2.952539 | -0.263260 |
| 7 | 2.159391  | -1.604050 | -0.502884 |
| 6 | 3.416968  | -1.393266 | -0.995676 |
| 6 | 4.159634  | -2.635846 | -1.067120 |
| 6 | 0.926942  | -3.626235 | 0.119035  |
| 6 | -0.323658 | -3.048966 | 0.259136  |
| 7 | -0.584510 | -1.714064 | 0.140435  |
| 6 | -1.936438 | -1.592298 | 0.271702  |
| 6 | -2.552717 | -2.883907 | 0.498583  |
| 6 | -1.540870 | -3.797803 | 0.500498  |
| 6 | -2.643006 | -0.402086 | 0.229022  |
| 6 | -2.093651 | 0.853759  | 0.030049  |
| 7 | -0.773343 | 1.106410  | -0.196407 |
| 6 | -0.684142 | 2.453492  | -0.400281 |
| 6 | -1.978673 | 3.083439  | -0.264419 |
| 6 | -2.862654 | 2.079814  | 0.009419  |
| 6 | 0.470756  | 3.134078  | -0.748119 |
| 6 | 1.708717  | 2.548596  | -0.965387 |
| 7 | 1.964143  | 1.213637  | -0.874593 |
| 6 | 3.240133  | 1.045761  | -1.326554 |
| 6 | 3.827048  | 2.308386  | -1.702926 |
| 6 | 2.884307  | 3.265542  | -1.434757 |
| 6 | 3.916385  | -0.162609 | -1.392837 |
| 1 | 0.391285  | 4.206719  | -0.912242 |
| 1 | 4.927165  | -0.140242 | -1.798708 |
| 1 | 0.996214  | -4.706955 | 0.243557  |
| 1 | -3.720654 | -0.454039 | 0.370949  |
| 6 | 1.035416  | 0.172120  | 1.691849  |
| 6 | 1.096860  | 1.589897  | 2.177651  |
| 6 | -0.078004 | 2.200170  | 2.634748  |
| 6 | 2.251057  | 2.404287  | 2.097699  |
| 6 | -0.127717 | 3.545308  | 2.984536  |
| 1 | -0.981187 | 1.602840  | 2.693393  |
| 6 | 2.209206  | 3.744974  | 2.478696  |
| 6 | 1.018620  | 4.320568  | 2.909251  |
| 1 | -1.071031 | 3.975434  | 3.316847  |
| 1 | 3.108453  | 4.352955  | 2.418534  |
| 1 | 1.001425  | 5.373303  | 3.188550  |
| 6 | 0.209576  | -0.749121 | 2.560910  |
| 8 | -0.924191 | -0.497347 | 2.903907  |
| 8 | 0.827253  | -1.899382 | 2.865204  |
| 8 | 3.391203  | 1.815288  | 1.665543  |
| 6 | 4.573918  | 2.568013  | 1.578060  |
| 1 | 5.335975  | 1.879309  | 1.198044  |
| 1 | 4.464881  | 3.406792  | 0.872573  |
| 1 | 4.886040  | 2.949331  | 2.562437  |
| 7 | 3.529944  | -1.130032 | 1.866552  |
| 7 | 2.652016  | -0.484027 | 2.079432  |
| 6 | -4.336405 | 2.192676  | 0.218921  |
| 1 | -4.688917 | 1.446209  | 0.946766  |

|   |           |           |           |
|---|-----------|-----------|-----------|
| 1 | -4.578505 | 3.178981  | 0.642312  |
| 6 | -5.128968 | 2.026226  | -1.092439 |
| 1 | -5.023470 | 1.000399  | -1.466842 |
| 1 | -4.732630 | 2.725399  | -1.839829 |
| 6 | -6.567111 | 2.380334  | -0.864500 |
| 8 | -7.021469 | 3.495763  | -0.840326 |
| 8 | -7.350800 | 1.295081  | -0.614772 |
| 1 | -8.244144 | 1.644028  | -0.442035 |
| 6 | -4.024946 | -3.091865 | 0.631418  |
| 1 | -4.443032 | -2.326139 | 1.298663  |
| 1 | -4.231977 | -4.056333 | 1.114580  |
| 6 | -4.751597 | -3.039139 | -0.731634 |
| 1 | -4.106378 | -2.515326 | -1.453933 |
| 1 | -4.937074 | -4.040996 | -1.133220 |
| 6 | -6.057025 | -2.290900 | -0.736019 |
| 8 | -7.099852 | -2.679713 | -1.202149 |
| 8 | -5.911447 | -1.065076 | -0.193179 |
| 1 | -6.737705 | -0.556069 | -0.320173 |
| 6 | -1.611769 | -5.272738 | 0.692438  |
| 1 | -2.642998 | -5.606836 | 0.861167  |
| 1 | -1.230550 | -5.820688 | -0.181481 |
| 1 | -1.015246 | -5.601689 | 1.557045  |
| 6 | -2.230202 | 4.545316  | -0.389022 |
| 1 | -1.629426 | 5.116375  | 0.335003  |
| 1 | -1.967673 | 4.923840  | -1.387479 |
| 1 | -3.285221 | 4.792084  | -0.215376 |
| 6 | 3.606245  | -5.056555 | -0.373225 |
| 1 | 3.080819  | -5.447031 | 0.508083  |
| 1 | 3.303690  | -5.677306 | -1.230718 |
| 1 | 4.681367  | -5.220608 | -0.222706 |
| 6 | 5.218054  | 2.494842  | -2.199912 |
| 1 | 5.423956  | 3.545717  | -2.436032 |
| 1 | 5.965063  | 2.179235  | -1.455229 |
| 1 | 5.410891  | 1.906843  | -3.108636 |
| 6 | 5.533372  | -2.751933 | -1.523576 |
| 6 | 6.092202  | -3.827433 | -2.091490 |
| 1 | 6.161759  | -1.868425 | -1.380886 |
| 1 | 7.140711  | -3.830161 | -2.381688 |
| 1 | 5.524307  | -4.730755 | -2.309180 |
| 6 | 3.057774  | 4.705061  | -1.556108 |
| 6 | 2.547640  | 5.637491  | -0.741238 |
| 1 | 3.706379  | 5.038659  | -2.371683 |
| 1 | 2.746426  | 6.694694  | -0.905741 |
| 1 | 1.936818  | 5.378900  | 0.124582  |
| 6 | 0.038810  | -2.880789 | 3.555026  |
| 1 | -0.976243 | -2.876109 | 3.137840  |
| 1 | 0.518523  | -3.833729 | 3.301670  |
| 6 | 0.036872  | -2.628933 | 5.043336  |
| 1 | -0.460950 | -1.680081 | 5.271538  |
| 1 | -0.499025 | -3.432234 | 5.563942  |



|    |           |           |           |
|----|-----------|-----------|-----------|
| 1  | 1.061552  | -2.591897 | 5.432926  |
| 7  | 0.234503  | -0.515910 | -2.259874 |
| 6  | 0.587884  | -1.545707 | -2.997941 |
| 6  | -0.492673 | 0.316670  | -3.077069 |
| 7  | 0.115654  | -1.413163 | -4.260597 |
| 1  | 1.176398  | -2.390658 | -2.660638 |
| 6  | -0.577432 | -0.224068 | -4.327125 |
| 1  | -0.903385 | 1.246526  | -2.704130 |
| 1  | 0.259154  | -2.068220 | -5.015280 |
| 1  | -1.052512 | 0.118308  | -5.235587 |
| 26 | 0.722515  | -0.232556 | -0.267799 |

-----  
**M06-<sup>1</sup>OSSC<sub>Fe(his)</sub>**  
 -----

Number of imaginary frequencies: 0    Electronic energy:    HF=-2834.7278582  
 Zero-point correction=                    0.881753 (Hartree/Particle)  
 Thermal correction to Energy=            0.940918  
 Thermal correction to Enthalpy=         0.941862  
 Thermal correction to Gibbs Free Energy= 0.787428  
 Sum of electronic and zero-point Energies= -2833.846105  
 Sum of electronic and thermal Energies= -2833.786940  
 Sum of electronic and thermal Enthalpies= -2833.785996  
 Sum of electronic and thermal Free Energies= -2833.940430

.....  
 Cartesian Coordinates  
 .....

|   |           |           |           |
|---|-----------|-----------|-----------|
| 6 | 3.368743  | -3.393324 | -0.645198 |
| 6 | 2.088146  | -2.792874 | -0.374547 |
| 7 | 2.129121  | -1.438390 | -0.571228 |
| 6 | 3.398446  | -1.161894 | -0.987973 |
| 6 | 4.193511  | -2.371121 | -1.048991 |
| 6 | 0.952457  | -3.517017 | -0.044556 |
| 6 | -0.305871 | -2.976584 | 0.148925  |
| 7 | -0.605855 | -1.646800 | 0.081384  |
| 6 | -1.950149 | -1.563174 | 0.298744  |
| 6 | -2.519272 | -2.875035 | 0.525302  |
| 6 | -1.488274 | -3.762051 | 0.436177  |
| 6 | -2.684813 | -0.392234 | 0.328216  |
| 6 | -2.172181 | 0.878876  | 0.131663  |
| 7 | -0.872817 | 1.167807  | -0.169075 |
| 6 | -0.808563 | 2.527848  | -0.286270 |
| 6 | -2.103799 | 3.121505  | -0.062072 |
| 6 | -2.957399 | 2.087921  | 0.207394  |
| 6 | 0.333201  | 3.256941  | -0.573760 |
| 6 | 1.586488  | 2.715595  | -0.795310 |
| 7 | 1.865250  | 1.380774  | -0.799392 |
| 6 | 3.154989  | 1.273582  | -1.229215 |
| 6 | 3.724391  | 2.572573  | -1.492784 |
| 6 | 2.758231  | 3.487410  | -1.170240 |
| 6 | 3.864882  | 0.090091  | -1.347415 |

|   |           |           |           |
|---|-----------|-----------|-----------|
| 1 | 0.235351  | 4.337649  | -0.653074 |
| 1 | 4.886503  | 0.160242  | -1.719403 |
| 1 | 1.051096  | -4.599337 | 0.037121  |
| 1 | -3.749603 | -0.471327 | 0.536067  |
| 6 | 0.941515  | 0.137990  | 1.512241  |
| 6 | 1.423899  | 1.388514  | 2.116589  |
| 6 | 0.513390  | 2.313089  | 2.630252  |
| 6 | 2.797201  | 1.693072  | 2.157706  |
| 6 | 0.941071  | 3.552746  | 3.101649  |
| 1 | -0.544092 | 2.050435  | 2.630097  |
| 6 | 3.227885  | 2.933498  | 2.620990  |
| 6 | 2.294341  | 3.862775  | 3.080458  |
| 1 | 0.214939  | 4.268934  | 3.482912  |
| 1 | 4.286199  | 3.182658  | 2.635333  |
| 1 | 2.642571  | 4.830922  | 3.438616  |
| 6 | 0.351175  | -0.811232 | 2.485488  |
| 8 | -0.706103 | -0.621129 | 3.048867  |
| 8 | 1.123315  | -1.888039 | 2.676601  |
| 8 | 3.623043  | 0.698750  | 1.748249  |
| 6 | 4.997327  | 0.966608  | 1.683198  |
| 1 | 5.466828  | 0.062995  | 1.281414  |
| 1 | 5.208952  | 1.814386  | 1.010937  |
| 1 | 5.418030  | 1.182601  | 2.677749  |
| 6 | -4.419140 | 2.163530  | 0.500750  |
| 1 | -4.716982 | 1.385961  | 1.219968  |
| 1 | -4.654384 | 3.129281  | 0.972389  |
| 6 | -5.277372 | 2.026295  | -0.772043 |
| 1 | -5.174425 | 1.014592  | -1.184263 |
| 1 | -4.935102 | 2.756458  | -1.516236 |
| 6 | -6.707645 | 2.343539  | -0.456558 |
| 8 | -7.193615 | 3.445076  | -0.422069 |
| 8 | -7.437437 | 1.240185  | -0.134288 |
| 1 | -8.327302 | 1.564819  | 0.094650  |
| 6 | -3.973730 | -3.123630 | 0.749431  |
| 1 | -4.364259 | -2.382777 | 1.459965  |
| 1 | -4.123370 | -4.102197 | 1.224820  |
| 6 | -4.790880 | -3.063422 | -0.561686 |
| 1 | -4.204918 | -2.518406 | -1.317787 |
| 1 | -4.987747 | -4.062538 | -0.964437 |
| 6 | -6.105846 | -2.338742 | -0.460574 |
| 8 | -7.177181 | -2.747287 | -0.835628 |
| 8 | -5.936422 | -1.109490 | 0.067815  |
| 1 | -6.781586 | -0.618031 | 0.025390  |
| 6 | -1.506332 | -5.242135 | 0.597925  |
| 1 | -2.515794 | -5.609405 | 0.819826  |
| 1 | -1.162279 | -5.760286 | -0.308863 |
| 1 | -0.850402 | -5.568402 | 1.419664  |
| 6 | -2.389291 | 4.582263  | -0.102869 |
| 1 | -2.156138 | 5.017778  | -1.084931 |
| 1 | -3.445548 | 4.794464  | 0.104369  |

|    |           |           |           |
|----|-----------|-----------|-----------|
| 1  | -1.788686 | 5.131037  | 0.637911  |
| 6  | 3.701449  | -4.832113 | -0.459851 |
| 1  | 3.132251  | -5.277278 | 0.366684  |
| 1  | 3.491779  | -5.434057 | -1.357472 |
| 1  | 4.768879  | -4.955151 | -0.234053 |
| 6  | 5.113066  | 2.822621  | -1.969140 |
| 1  | 5.868150  | 2.437290  | -1.267081 |
| 1  | 5.305535  | 2.336928  | -2.936737 |
| 1  | 5.306292  | 3.894778  | -2.091506 |
| 6  | 5.596218  | -2.415949 | -1.422796 |
| 6  | 6.238655  | -3.452871 | -1.973736 |
| 1  | 6.172916  | -1.507200 | -1.227189 |
| 1  | 7.301604  | -3.400743 | -2.199260 |
| 1  | 5.729061  | -4.377229 | -2.241192 |
| 6  | 2.885838  | 4.937560  | -1.175065 |
| 6  | 2.366818  | 5.766102  | -0.261705 |
| 1  | 3.493463  | 5.366136  | -1.977480 |
| 1  | 2.517904  | 6.841810  | -0.327868 |
| 1  | 1.806392  | 5.396156  | 0.598148  |
| 6  | 0.558393  | -2.915187 | 3.498787  |
| 1  | 0.359066  | -2.509674 | 4.499831  |
| 1  | -0.409130 | -3.213465 | 3.066109  |
| 6  | 1.544179  | -4.053737 | 3.524697  |
| 1  | 2.503416  | -3.730745 | 3.946476  |
| 1  | 1.159232  | -4.882772 | 4.131031  |
| 1  | 1.728941  | -4.419013 | 2.505208  |
| 7  | 0.172333  | -0.345657 | -2.375995 |
| 6  | 0.692046  | -1.231765 | -3.194350 |
| 6  | -0.708190 | 0.400183  | -3.120211 |
| 7  | 0.181712  | -1.090523 | -4.442375 |
| 1  | 1.432188  | -1.977257 | -2.926115 |
| 6  | -0.717910 | -0.047057 | -4.410308 |
| 1  | -1.273947 | 1.206819  | -2.669154 |
| 1  | 0.425615  | -1.647852 | -5.248367 |
| 1  | -1.264582 | 0.270938  | -5.287045 |
| 26 | 0.651398  | -0.121670 | -0.267960 |

---

**M06-1<sup>OSS</sup>TS(C-D)<sub>Fe(his)</sub>**

---

Number of imaginary frequencies: 1    Electronic energy:    HF=-2834.7006627  
Zero-point correction=                    0.876703 (Hartree/Particle)  
Thermal correction to Energy=            0.934675  
Thermal correction to Enthalpy=         0.935619  
Thermal correction to Gibbs Free Energy= 0.785426  
Sum of electronic and zero-point Energies= -2833.823960  
Sum of electronic and thermal Energies= -2833.765988  
Sum of electronic and thermal Enthalpies= -2833.765043  
Sum of electronic and thermal Free Energies= -2833.915236

---

Cartesian Coordinates

.....

|   |           |           |           |
|---|-----------|-----------|-----------|
| 6 | 3.048524  | -3.637771 | -0.885123 |
| 6 | 1.851470  | -2.937515 | -0.498335 |
| 7 | 1.986560  | -1.586394 | -0.684336 |
| 6 | 3.235159  | -1.412194 | -1.204926 |
| 6 | 3.918925  | -2.681878 | -1.346670 |
| 6 | 0.703932  | -3.568964 | -0.054638 |
| 6 | -0.480035 | -2.933702 | 0.277856  |
| 7 | -0.677686 | -1.582051 | 0.289604  |
| 6 | -1.990000 | -1.404356 | 0.628951  |
| 6 | -2.642333 | -2.675891 | 0.832089  |
| 6 | -1.690407 | -3.634711 | 0.624706  |
| 6 | -2.623655 | -0.176882 | 0.712569  |
| 6 | -2.035173 | 1.044573  | 0.433935  |
| 7 | -0.737692 | 1.230082  | 0.052429  |
| 6 | -0.601479 | 2.570116  | -0.159400 |
| 6 | -1.838478 | 3.263327  | 0.106319  |
| 6 | -2.738703 | 2.305559  | 0.471822  |
| 6 | 0.552217  | 3.211987  | -0.577310 |
| 6 | 1.748226  | 2.587213  | -0.871228 |
| 7 | 1.937454  | 1.234306  | -0.867503 |
| 6 | 3.194204  | 1.037707  | -1.364061 |
| 6 | 3.833038  | 2.292158  | -1.674143 |
| 6 | 2.941919  | 3.273504  | -1.333368 |
| 6 | 3.796887  | -0.194249 | -1.547391 |
| 1 | 0.510409  | 4.291825  | -0.700091 |
| 1 | 4.796037  | -0.200825 | -1.979474 |
| 1 | 0.719073  | -4.656818 | 0.002050  |
| 1 | -3.673819 | -0.171502 | 1.003882  |
| 6 | -4.207207 | 2.446018  | 0.681990  |
| 1 | -4.567347 | 1.773550  | 1.474460  |
| 1 | -4.473139 | 3.459828  | 1.009604  |
| 6 | -4.936054 | 2.130696  | -0.624642 |
| 1 | -4.598408 | 1.170341  | -1.042201 |
| 1 | -4.671013 | 2.882062  | -1.386383 |
| 6 | -6.425877 | 2.139673  | -0.482320 |
| 8 | -7.071947 | 2.759438  | 0.321379  |
| 8 | -7.017906 | 1.337572  | -1.413389 |
| 1 | -7.978473 | 1.411617  | -1.263260 |
| 6 | -4.093111 | -2.904264 | 1.094108  |
| 1 | -4.553703 | -2.056159 | 1.620482  |
| 1 | -4.218340 | -3.770961 | 1.758688  |
| 6 | -4.882871 | -3.191409 | -0.200554 |
| 1 | -4.344910 | -3.933910 | -0.802499 |
| 1 | -5.875570 | -3.584007 | 0.053685  |
| 6 | -5.059876 | -1.950914 | -1.029940 |
| 8 | -4.363888 | -1.606516 | -1.961294 |
| 8 | -6.101127 | -1.229200 | -0.588862 |
| 1 | -6.215400 | -0.441565 | -1.161588 |
| 6 | -1.827063 | -5.115267 | 0.710813  |

|   |           |           |           |
|---|-----------|-----------|-----------|
| 1 | -2.821851 | -5.409078 | 1.068892  |
| 1 | -1.673179 | -5.602725 | -0.263130 |
| 1 | -1.090995 | -5.549758 | 1.403527  |
| 6 | -2.033786 | 4.733679  | -0.017614 |
| 1 | -1.865354 | 5.087679  | -1.044823 |
| 1 | -3.049561 | 5.031087  | 0.271367  |
| 1 | -1.332896 | 5.284497  | 0.627726  |
| 6 | 3.269641  | -5.103138 | -0.753104 |
| 1 | 2.751992  | -5.514125 | 0.123125  |
| 1 | 2.913104  | -5.660934 | -1.632469 |
| 1 | 4.339621  | -5.324052 | -0.645002 |
| 6 | 5.224628  | 2.438378  | -2.179858 |
| 1 | 5.956313  | 2.068232  | -1.446843 |
| 1 | 5.386268  | 1.873935  | -3.109238 |
| 1 | 5.470670  | 3.487596  | -2.380866 |
| 6 | 5.276666  | -2.837617 | -1.839408 |
| 6 | 5.767494  | -3.906772 | -2.477053 |
| 1 | 5.951344  | -1.995091 | -1.663728 |
| 1 | 6.807956  | -3.945299 | -2.792393 |
| 1 | 5.148366  | -4.765279 | -2.732492 |
| 6 | 3.164046  | 4.710250  | -1.400298 |
| 6 | 2.714705  | 5.620886  | -0.529163 |
| 1 | 3.792006  | 5.054798  | -2.227244 |
| 1 | 2.942656  | 6.677460  | -0.655398 |
| 1 | 2.139654  | 5.340360  | 0.353848  |
| 6 | 1.301464  | 0.048626  | 1.612250  |
| 6 | 1.654969  | 1.400562  | 2.112857  |
| 6 | 0.553660  | -0.782729 | 2.588994  |
| 6 | 0.711756  | 2.308060  | 2.608443  |
| 6 | 2.992229  | 1.832398  | 2.070179  |
| 8 | -0.425587 | -0.428574 | 3.212013  |
| 8 | 1.102301  | -2.012647 | 2.715501  |
| 6 | 1.074933  | 3.597423  | 2.983064  |
| 1 | -0.321235 | 1.977805  | 2.693086  |
| 6 | 3.367119  | 3.120669  | 2.423428  |
| 8 | 3.985317  | 0.985433  | 1.623014  |
| 6 | 2.399969  | 4.012640  | 2.873730  |
| 1 | 0.315600  | 4.279556  | 3.363862  |
| 1 | 4.416375  | 3.399341  | 2.345494  |
| 6 | 3.779613  | -0.332973 | 1.908109  |
| 1 | 2.688904  | 5.023843  | 3.157579  |
| 1 | 3.690829  | -0.580583 | 2.972942  |
| 1 | 4.395185  | -0.988661 | 1.291969  |
| 1 | 2.393556  | -0.501911 | 1.466998  |
| 7 | -0.152959 | -0.306802 | -2.209191 |
| 6 | -1.276777 | -0.913034 | -2.531551 |
| 6 | 0.237054  | 0.402353  | -3.319755 |
| 7 | -1.626608 | -0.625145 | -3.804518 |
| 1 | -1.882584 | -1.542282 | -1.891318 |
| 6 | -0.668308 | 0.217930  | -4.325580 |

|    |           |           |           |
|----|-----------|-----------|-----------|
| 1  | 1.142530  | 0.997955  | -3.310768 |
| 1  | -2.479045 | -0.939992 | -4.246962 |
| 1  | -0.716254 | 0.594101  | -5.337879 |
| 6  | 0.382717  | -2.943922 | 3.526959  |
| 1  | -0.693842 | -2.803642 | 3.361219  |
| 1  | 0.671864  | -3.929560 | 3.139580  |
| 6  | 0.740543  | -2.789486 | 4.986323  |
| 1  | 0.423005  | -1.806828 | 5.352228  |
| 1  | 0.243847  | -3.560163 | 5.589201  |
| 1  | 1.823874  | -2.885692 | 5.131621  |
| 26 | 0.653308  | -0.166869 | -0.225989 |
